# Supplementary material
Source: PubMed Central journal article supplement (PMC5805144)
Supplement: NIHMS887106-supplement-Table_1.pdf [file NIHMS887106-supplement-Table_1.pdf]

| gene_id       | locus                     | Bitter (average RPKM) | Sweet (average RPKM) |
|---------------|---------------------------|-----------------------|----------------------|
| Rn45s         | chr17:39979941-39985774   | 11081.73              | 11014.91333          |
| Malat1        | chr19:5795689-5802671     | 8897.063333           | 7926.053333          |
| Gnat3         | chr5:17468387-17525486    | 7032.633333           | 2164.426667          |
| Tas2r118      | chr6:23919160-23920060    | 2652.88               | 191.8672             |
| Calm2         | chr17:87832740-87846275   | 2226.073333           | 3029.243333          |
| Rpl41         | chr10:127985165-127986224 | 1771.656667           | 2455.086667          |
| Gng13         | chr17:25854116-25856047   | 1757.043333           | 1246.152667          |
| Gnb3          | chr6:124784257-124790293  | 1753.483333           | 1222.204333          |
| Anxa4         | chr6:86686833-86743578    | 1438.023333           | 2047.956667          |
| Plcb2         | chr2:118533252-118554174  | 1243.376667           | 2301.21              |
| Neat1         | chr19:5842301-5845478     | 1127.253333           | 193.3866667          |
| Lars2         | chr9:123276057-123371782  | 1064.750667           | 1201.365667          |
| Mir546        | chr10:126435495-126435616 | 1050.851333           | 1725.506667          |
| Actb          | chr5:143664794-143668403  | 960.833               | 964.2713333          |
| Trpm5         | chr7:150257433-150280547  | 907.8946667           | 552.342              |
| Ptma          | chr1:88423310-88427273    | 898.272               | 697.176              |
| Tas2r138      | chr6:40562313-40563309    | 853.021               | 32.84176667          |
| Egr1          | chr18:35020860-35024610   | 842.4353333           | 623.5863333          |
| Hsp90b1       | chr10:86153585-86168189   | 836.2936667           | 903.8106667          |
| Atp5b         | chr10:127520362-127527444 | 812.847               | 1005.606667          |
| Eef1a1        | chr9:78326260-78329531    | 812.1783333           | 1517.136667          |
| Krt19         | chr11:100002125-100007233 | 811.4086667           | 402.8933333          |
| Hsp90ab1      | chr17:45704726-45710210   | 783.2853333           | 887.2616667          |
| Tuba1a        | chr15:98780277-98783932   | 740.1193333           | 717.1663333          |
| Ivns1abp      | chr1:153191627-153211575  | 736.6293333           | 648.361              |
| Ubb           | chr11:62365005-62366714   | 736.4526667           | 578.777              |
| Ywhaz         | chr15:36700015-36726684   | 714.8866667           | 884.6103333          |
| Ywhae         | chr11:75546388-75579343   | 683.512               | 786.1296667          |
| Ddx17         | chr15:79358125-79377171   | 645.323               | 319.7683333          |
| Tas2r105      | chr6:131636578-131637481  | 639.2                 | 1.99852              |
| Tas2r104      | chr6:131634853-131635762  | 628.9263333           | 1.587863333          |
| Snora31       | chr14:76247729-76247841   | 628.362               | 828.7993333          |
| Ubc           | chr5:125866334-125870387  | 615.645               | 523.7923333          |
| DOH4S114      | chr18:33596672-33623683   | 612.9513333           | 240.8843333          |
| Mir703        | chr5:98904574-98904683    | 609.818               | 1724.046667          |
| Tas2r139      | chr6:42090934-42091894    | 603.1676667           | 4.094214333          |
| Cap1          | chr4:122536470-122563124  | 602.3873333           | 302.0773333          |
| Krt18         | chr15:101858646-101862457 | 593.306               | 722.623              |
| Fth1          | chr19:10057192-10059582   | 575.3666667           | 439.3153333          |
| Crip1         | chr12:114390222-114392090 | 569.939               | 757.862              |
| Expi          | chr11:83522505-83524862   | 554.7303333           | 886.8227             |
| Rab7          | chr6:87950428-87963684    | 549.8746667           | 556.115              |
| Hspa8         | chr9:40609355-40613282    | 529.692               | 689.7173333          |
| Sod1          | chr16:90220986-90226569   | 526.4346667           | 487.8916667          |
| Capns1        | chr7:30971960-30980067    | 524.9466667           | 380.213              |
| 1810046K07Rik | chr9:51097790-51137022    | 524.6036667           | 318.1033333          |
| Avil          | chr10:126437764-126458050 | 519                   | 236.564              |
| Plac8         | chr5:100982751-101001224  | 509.697               | 84.4809              |
| Cdkn1a        | chr17:29227930-29237667   | 506.5236667           | 322.4053333          |
| Lrmp          | chr6:145070258-145123448  | 506.051               | 844.743              |
| Myl12b        | chr17:71323302-71339856   | 504.7273333           | 348.9333333          |

|          |                           |             |             |
|----------|---------------------------|-------------|-------------|
| Gm1821   | chr14:46703701-46704632   | 500.0256667 | 377.867     |
| Rpl32    | chr6:115755531-115758761  | 493.5656667 | 771.273     |
| H3f3a    | chr1:182732698-182743734  | 487.7883333 | 507.393     |
| Plk2     | chr13:111185251-111191051 | 484.6296667 | 267.9846667 |
| Cited2   | chr10:174430333-17445480  | 475.734     | 136.5236667 |
| Actg1    | chr11:120207003-120209798 | 470.9776667 | 550.7906667 |
| Atp1b1   | chr1:166367397-166388486  | 468.7873333 | 523.8493333 |
| Uqcr10   | chr11:4601970-4604347     | 464.0006667 | 480.2733333 |
| Fos      | chr12:86814850-86818219   | 463.666     | 380.088     |
| Rps24    | chr14:25309902-25315368   | 456.5613333 | 483.558     |
| Tas2r106 | chr6:131627977-131628904  | 444.279     | 3.561313    |
| Rpl36al  | chr12:70283720-70285054   | 432.2136667 | 480.463     |
| Tmsb4x   | chrX:163645025-163647150  | 417.4736667 | 280.123     |
| Rps9     | chr7:3655642-3658499      | 415.3216667 | 602.3116667 |
| Ascl2    | chr7:150152726-150155169  | 413.4346667 | 261.8766667 |
| Cox6a1   | chr5:115795662-115798964  | 408.5853333 | 435.269     |
| Abhd2    | chr7:86418151-86506487    | 407.8676667 | 365.3783333 |
| Pou2f3   | chr9:42932021-43013838    | 400.4706667 | 487.7493333 |
| Zfp36    | chr7:29161802-29164247    | 400.326     | 356.4213333 |
| Xist     | chrX:100655711-100678572  | 400.1325367 | 262.726629  |
| Rpl4     | chr9:64021193-64026369    | 390.601     | 724.4983333 |
| Rps15    | chr10:79755175-79756859   | 388.125     | 608.0516667 |
| B3gnt2   | chr11:22734738-22760336   | 386.8513333 | 135.9708    |
| Gnas     | chr2:174109820-174172243  | 381.4046667 | 758.4666667 |
| Mt4      | chr8:96661103-96662931    | 378.094     | 1496.04     |
| Jun      | chr4:94715726-94718913    | 376         | 266.3463333 |
| Eif1     | chr11:100181309-100183410 | 375.222     | 260.061     |
| Fxyd6    | chr9:45178267-45204242    | 370.0483333 | 833.5923333 |
| Rpl39    | chrX:34622514-34625179    | 366.5736667 | 661.568     |
| Tsc22d1  | chr14:76815627-76907573   | 361.706     | 284.7336667 |
| Lpgat1   | chr1:193541902-193608134  | 361.5143333 | 92.88363333 |
| Tas2r108 | chr6:40443590-40444484    | 361.278     | 56.31576667 |
| Cd24a    | chr10:43298974-43304071   | 355.925     | 486.7363333 |
| Mir686   | chr14:55235513-55235622   | 352.7253333 | 233.2923333 |
| Krtdap   | chr7:31572923-31576102    | 349.7616667 | 972.7366667 |
| Ost4     | chr5:31208890-31210161    | 349.7283333 | 312.046     |
| Commd1   | chr11:22799727-22882284   | 347.2063333 | 71.28666667 |
| Krt8     | chr15:101827141-101834773 | 343.419     | 317.6756667 |
| Eya1     | chr1:14159038-14300280    | 341.9906667 | 81.05386667 |
| Mrfap1   | chr5:37186105-37187993    | 341.6116667 | 338.5916667 |
| Rps5     | chr7:13507659-13512035    | 336.0936667 | 493.9926667 |
| H3f3b    | chr11:115883274-115885818 | 332.0766667 | 268.6443333 |
| Sprr1a   | chr3:92287875-92289803    | 331.8743333 | 559.4126667 |
| Hepacam2 | chr6:3407088-3444498      | 325.8413333 | 408.479     |
| Lgals9   | chr11:78776480-78798426   | 322.0203333 | 36.91263667 |
| Nlk      | chr11:78380669-78510927   | 321.923     | 135.5087    |
| Dusp1    | chr17:26642535-26645417   | 320.221     | 631.668     |
| Gapdh    | chr6:125111869-125115601  | 317.0856667 | 241.1106667 |
| F11r     | chr1:173367691-173394724  | 316.9516667 | 121.9442333 |
| Anp32b   | chr4:46463988-46485395    | 316.341     | 247.5886667 |
| Slitrk6  | chr14:111147799-111154371 | 315.555     | 160.5536667 |
| Cox6c    | chr15:35861730-35868001   | 315.219     | 186.2573333 |

|               |                           |             |             |
|---------------|---------------------------|-------------|-------------|
| Uqcrh         | chr4:115739569-115747675  | 309.4806667 | 228.8106667 |
| Hspa5         | chr2:34627609-34632049    | 307.5923333 | 596.2036667 |
| Ppia          | chr11:6315872-6319813     | 307.0636667 | 397.1726667 |
| Car7          | chr8:107064706-107074243  | 303.971     | 73.98273333 |
| Cox8a         | chr19:7289647-7292106     | 303.6456667 | 550.0833333 |
| Suox          | chr10:128106942-128110974 | 303.1823333 | 104.9872333 |
| Sh3bgrl       | chrX:106290745-106357806  | 302.4083333 | 80.43036667 |
| Prom2         | chr2:127352688-127367153  | 301.902     | 244.5353333 |
| Rpl10a        | chr17:28465415-28467978   | 300.8006667 | 485.6163333 |
| Arf3          | chr15:98568056-98593549   | 300.256     | 232.1333333 |
| Atf3          | chr1:192994175-193007212  | 300.222     | 154.901     |
| Ero1lb        | chr13:12658149-12701795   | 300.1246667 | 342.7026667 |
| Atf4          | chr15:80085613-80087971   | 296.815     | 314.547     |
| Dsp           | chr13:38243162-38290446   | 295.0686667 | 443.6033333 |
| Eef2          | chr10:80639375-80645254   | 294.9473333 | 411.623     |
| Snora30       | chr7:134671410-134671517  | 294.549     | 330.2573333 |
| Tas2r116      | chr6:132805455-132806373  | 293.7426667 | 0.315149667 |
| Kctd12        | chr14:103375797-103381854 | 292.4736667 | 213.6403333 |
| Ftl1          | chr7:52713313-52715256    | 292.3463333 | 262.6713333 |
| 2700089E24Rik | chr6:133055256-133057764  | 290.3796667 | 13.30001333 |
| Pfn1          | chr11:70465348-70468152   | 290.0363333 | 252.0923333 |
| Ddx5          | chr11:106641669-106649808 | 289.9533333 | 432.794     |
| Sepw1         | chr7:16502556-16507720    | 288.6556667 | 124.7421    |
| Anxa1         | chr19:20447923-20465161   | 287.7946667 | 280.5866667 |
| Srrm2         | chr17:23940153-23961710   | 287.0093333 | 270.7443333 |
| Ptms          | chr6:124863692-124867964  | 285.7906667 | 237.7293333 |
| Rnasek        | chr11:70051624-70053354   | 285.485     | 297.4723333 |
| Epcam         | chr17:88035318-88050467   | 283.2936667 | 283.0593333 |
| Uba52         | chr8:73032164-73034266    | 283.2853333 | 335.9986667 |
| Krt13         | chr11:99978909-99982809   | 279.512     | 1117.507    |
| Tas2r137      | chr6:40441236-40442238    | 279.189     | 52.9053     |
| Rps21         | chr2:179992083-179993149  | 277.6736667 | 425.1583333 |
| Dazap2        | chr15:100446092-100451192 | 275.3183333 | 234.0163333 |
| 2310001H17Rik | chr6:129182640-129188500  | 273.615     | 31.67216667 |
| Atp5e         | chr2:174286575-174289602  | 271.4056667 | 462.4396667 |
| Psip1         | chr4:83101584-83132294    | 271.276     | 224.6443333 |
| Snora21       | chr11:97642952-97643080   | 270.118     | 140.862     |
| Aplp2         | chr9:30957141-31019400    | 268.6676667 | 287.162     |
| Atp5k         | chr5:108862271-108863397  | 266.7933333 | 191.5076667 |
| Tas2r117      | chr6:132752918-132753911  | 266.3143333 | 0.883096667 |
| Gclc          | chr9:77602341-77642296    | 262.639     | 204.3023333 |
| S100a6        | chr3:90416815-90418336    | 262.2566667 | 264.883     |
| Aldoa         | chr7:133938747-133943961  | 255.0443333 | 154.5243333 |
| Gnai2         | chr9:107516468-107537673  | 254.6626667 | 210.739     |
| Cox4i1        | chr8:123192189-123198109  | 253.3353333 | 291.783     |
| Ociad2        | chr5:73713437-73729878    | 253.1496667 | 84.85986667 |
| Krt6a         | chr15:101520358-101524736 | 252.7163333 | 581.832     |
| Hnrnp1        | chr11:50191220-50200030   | 252.5216667 | 266.002     |
| 2410006H16Rik | chr11:62416378-62418308   | 249.1493333 | 219.5766667 |
| Calm1         | chr12:101437750-101448016 | 248.9413333 | 398.4016667 |
| Tpt1          | chr14:76245062-76248110   | 248.719     | 277.923     |
| Prnp          | chr2:131735663-131764167  | 248.6653333 | 315.547     |

|               |                           |             |             |
|---------------|---------------------------|-------------|-------------|
| Ly6g6c        | chr17:35204269-35206993   | 248.2076667 | 321.9821    |
| Hnrnpa2b1     | chr6:51410433-51419893    | 247.672     | 277.4726667 |
| Ccdc28b       | chr4:129296517-129301152  | 247.2203333 | 94.3186     |
| Rpl38         | chr11:114529856-114533645 | 247.0196667 | 192.0511667 |
| Dynlrb1       | chr2:155062268-155076013  | 246.6633333 | 348.6906667 |
| Lcp1          | chr14:75530929-75630649   | 245.2843333 | 147.273     |
| Rps3a         | chr3:85941861-85946590    | 245.1173333 | 256.4506667 |
| 1700003M07Rik | chr4:129637617-129642382  | 245.1133333 | 3.89726     |
| Tpm1          | chr9:66870399-66897020    | 244.309     | 262.3476667 |
| Rplp2-ps1     | chr12:76731911-76732736   | 243.904     | 336.9536667 |
| Ifitm2        | chr7:148140737-148141860  | 243.1783333 | 336.302     |
| Tbca          | chr13:95558897-95612854   | 242.3826667 | 217.2113333 |
| Hist1h4d      | chr13:23673470-23673782   | 242.338     | 134.6751    |
| Gdi1          | chrX:71550350-71557206    | 242.162     | 225.0006667 |
| Lima1         | chr15:99608898-99705887   | 241.9553333 | 162.632     |
| Perp          | chr10:18564876-18576878   | 240.9476667 | 538.7763333 |
| Ano7          | chr1:95270472-95300079    | 239.055     | 208.1476667 |
| Cox6b1        | chr7:31401992-31411170    | 237.968     | 243.155     |
| H2-D1         | chr17:35400038-35404442   | 236.9823333 | 157.575     |
| Arf1          | chr11:59024913-59041769   | 233.5373333 | 188.2313333 |
| Snora24       | chr3:123210854-123210984  | 233.4283333 | 12.13753333 |
| Atpif1        | chr4:132086469-132089574  | 233.253     | 320.0263333 |
| Krt4          | chr15:101748965-101755166 | 232.6616667 | 885.625     |
| Hsbp1         | chr8:121868437-121872829  | 230.7803333 | 184.6256667 |
| Klf5          | chr14:99697909-99712628   | 229.7533333 | 170.5546667 |
| Srsf5         | chr12:82046490-82051494   | 229.7436667 | 198.206     |
| Atp2a3        | chr11:72774670-72806545   | 229.2336667 | 312.597     |
| Tob1          | chr11:94072767-94076806   | 228.443     | 178.4233333 |
| Rps14         | chr18:60934249-60938200   | 226.7223333 | 350.4266667 |
| Rpl8          | chr15:76734500-76736748   | 225.6153333 | 243.716     |
| Arcp2         | chr1:74283123-74314787    | 224.7896667 | 209.0356667 |
| Gm9786        | chr10:80289440-80291962   | 223.224     | 168.3703333 |
| Rassf6        | chr5:91032101-91069513    | 222.5416667 | 76.99153333 |
| Cdh1          | chr8:109127267-109194146  | 222.315     | 304.1896667 |
| Spag11a       | chr8:19157886-19159578    | 222.3053333 | 0           |
| Tuba1b        | chr15:98761861-98764821   | 222.175     | 225.073     |
| Lamp1         | chr8:13159134-13175338    | 221.3663333 | 193.978     |
| Tas2r121      | chr6:132650107-132651025  | 221.0813333 | 0.139493667 |
| Chi3l1        | chr1:136078980-136086608  | 219.795     | 123.9319667 |
| Nupr1         | chr7:133766759-133768984  | 219.1026667 | 82.538      |
| Cfl1          | chr19:5490454-5494031     | 215.6093333 | 256.2643333 |
| Rps11         | chr7:52377757-52379759    | 214.3803333 | 350.1656667 |
| Mir708        | chr7:103397933-103398042  | 214.3763333 | 0           |
| Gnb1          | chr4:154865469-154933378  | 211.8363333 | 176.1713333 |
| Rplp1         | chr9:61761089-61762317    | 210.8086667 | 226.548     |
| Cpeb4         | chr11:31772210-31831577   | 210.772     | 302.1963333 |
| Gm10012       | chr17:26038800-26039172   | 210.1446667 | 151.918     |
| Nek2          | chr1:193645351-193656928  | 209.728     | 30.11813333 |
| Rps26         | chr10:128061584-128063562 | 209.267     | 330.626     |
| 2700029M09Rik | chr8:63369247-63386369    | 208.74      | 75.58633333 |
| Mir1192       | chr19:23223920-23224041   | 208.5485    | 193.451     |
| Msi2          | chr11:88152883-88579581   | 208.267     | 154.2666667 |

|               |                           |             |             |
|---------------|---------------------------|-------------|-------------|
| Slc2a1        | chr4:118781349-118809934  | 207.3926667 | 162.8796667 |
| Dad1          | chr14:54855159-54873604   | 206.5453333 | 135.7296667 |
| Gm6682        | chr12:4788975-4790318     | 206.216     | 232.9203333 |
| Rab1          | chr11:20101604-20126859   | 206.1776667 | 228.8206667 |
| Btg2          | chr1:135971441-135975732  | 206.1603333 | 208.2       |
| Bag1          | chr4:40883430-40895327    | 205.9883333 | 72.49603333 |
| Gsta4         | chr9:78039772-78057156    | 205.225     | 372.0553333 |
| Dap           | chr15:31154139-31204093   | 205.2226667 | 180.183     |
| Ank           | chr15:27396431-27524662   | 204.2436667 | 138.4593333 |
| Dstn          | chr2:143741066-143769060  | 204.091     | 363.5506667 |
| Cox17         | chr16:38347084-38352849   | 202.9216667 | 89.69176667 |
| Rpl29         | chr9:106331869-106333898  | 202.8963333 | 245.3086667 |
| Tas2r134      | chr2:51483030-51483927    | 202.3753333 | 5.351960667 |
| L1cam         | chrX:71099118-71126173    | 201.152     | 86.2428     |
| Vamp2         | chr11:68902029-68905883   | 200.7926667 | 133.4066667 |
| Slc38a2       | chr15:96517822-96530129   | 200.5593333 | 185.0293333 |
| Klf3          | chr5:65194761-65221368    | 199.8976667 | 222.1636667 |
| Tuba1c        | chr15:98860321-98868536   | 199.7383333 | 192.482     |
| Snrnp70       | chr7:52631823-52651017    | 199.4216667 | 151.631     |
| Rps4x         | chrX:99380281-99383710    | 198.352     | 400.5386667 |
| Ly6d          | chr15:74592485-74593997   | 197.9927    | 365.337     |
| Txn1          | chr4:57956244-57969283    | 197.982     | 169.188     |
| Eif4g2        | chr7:118211498-118226544  | 195.6733333 | 238.228     |
| Atp5a1        | chr18:78012506-78021607   | 194.1856667 | 185.7686667 |
| Snora33       | chr10:23505152-23505257   | 194.163     | 202.891     |
| Cnbp          | chr6:87792608-87801100    | 193.4106667 | 258.2023333 |
| Csda          | chr6:131314875-131338468  | 192.8373333 | 152.3406667 |
| Ndufb9        | chr15:58765364-58771044   | 192.8246667 | 167.0342333 |
| Akr1a1        | chr4:116309114-116324279  | 192.7906667 | 148.5726667 |
| Fetub         | chr16:22918454-22939841   | 192.5666667 | 141.1397333 |
| Rtn4          | chr11:29592897-29644414   | 191.3136667 | 125.7354333 |
| Gm5148        | chr3:37613111-37623282    | 191.2976667 | 257.0776667 |
| Gm5480        | chr16:5007380-5008401     | 190.8726667 | 139.901     |
| Srsf2         | chr11:116711210-116714408 | 190.222     | 264.545     |
| Ecm1          | chr3:95538070-95543492    | 189.5349    | 74.72363333 |
| Stk38         | chr17:29107829-29144882   | 188.0793333 | 77.19053333 |
| Tas2r131      | chr6:132906929-132907862  | 186.4833333 | 2.519983667 |
| 5033414D02Rik | chr19:29423166-29436361   | 185.523     | 109.2489333 |
| 2410022L05Rik | chr8:13884787-13890271    | 185.3866667 | 125.4953333 |
| Sec14l1       | chr11:116976485-117020582 | 184.412     | 138.7906667 |
| Atp5l         | chr9:44721330-44728825    | 184.1176667 | 183.1286667 |
| Cox7c         | chr13:86184402-86186400   | 184.089     | 147.412     |
| Ube2e3        | chr2:78709203-78760740    | 183.4786667 | 71.48133333 |
| Ethe1         | chr7:25372561-25393944    | 183.2986667 | 130.3756333 |
| Rps20         | chr4:3761619-3762747      | 181.878     | 395.4       |
| Myl6          | chr10:127927916-127930881 | 181.206     | 158.787     |
| Ctnnb1        | chr9:120842517-120869625  | 180.8093333 | 242.941     |
| Nedd8         | chr14:56281103-56290743   | 180.7793333 | 215.704     |
| Anxa2         | chr9:69301489-69339592    | 180.2756667 | 213.419     |
| Itm2b         | chr14:73762038-73785078   | 179.1213333 | 219.1843333 |
| Pabpc1        | chr15:36525412-36538728   | 179.0026667 | 272.342     |
| Rps17         | chr7:88487618-88490120    | 178.6776667 | 259.6633333 |

|               |                           |             |             |
|---------------|---------------------------|-------------|-------------|
| Srsf3         | chr17:29169604-29180317   | 177.0323333 | 220.3303333 |
| Fosb          | chr7:19888044-19895394    | 176.4931667 | 145.533     |
| Zfp207        | chr11:80196780-80219375   | 176.193     | 152.7246667 |
| Oaz1          | chr10:80289400-80292035   | 176.0856667 | 87.6917     |
| Dmxl2         | chr9:54212964-54349433    | 173.99      | 77.80496667 |
| Eif4a2        | chr16:23107551-23114205   | 173.65      | 230.785     |
| Tecr          | chr8:86095596-86118390    | 172.8573333 | 302.0536667 |
| Rps27l        | chr9:66793924-66797316    | 172.809     | 119.3682    |
| Tgm3          | chr2:129838109-129876135  | 172.1143333 | 219.614     |
| D730040F13Rik | chr4:56888884-56960301    | 171.6906667 | 49.40886667 |
| Snora41       | chr1:63225596-63225709    | 171.4783333 | 77.031      |
| Tas2r102      | chr6:132712148-132713192  | 170.2616667 | 1.673033667 |
| Pomp          | chr5:148672203-148687354  | 169.8806667 | 299.097     |
| Arpc5         | chr1:154613671-154622710  | 169.7493333 | 151.772     |
| Gm12070       | chr11:26685107-26687859   | 169.7036667 | 135.4053333 |
| Mif           | chr10:75322097-75322995   | 168.039     | 114.6922333 |
| Lyz2          | chr10:116714596-116719328 | 167.9797    | 433.9781333 |
| Tmem66        | chr8:35217616-35233901    | 166.837     | 115.1301    |
| Eif3a         | chr19:60837018-60866596   | 166.2066667 | 172.875     |
| Twsg1         | chr17:66272404-66300527   | 165.9453333 | 161.3653333 |
| Spag11b       | chr8:19140758-19143010    | 165.1983333 | 0.570884333 |
| Gm9846        | chr3:90016588-90017569    | 165.0417    | 292.902     |
| Rhoa          | chr9:108208535-108240270  | 164.856     | 178.399     |
| Smarca2       | chr19:26679649-26852811   | 164.533     | 202.706     |
| Basp1         | chr15:25293031-25343519   | 164.1713333 | 152.9656667 |
| Tspan13       | chr12:36741141-36769065   | 164.005     | 213.523     |
| Tmem50b       | chr16:91574752-91597925   | 163.78      | 393.0973333 |
| Hspb1         | chr5:136363788-136365433  | 163.722     | 205.8786667 |
| 2010107E04Rik | chr12:113199586-113205188 | 162.9891667 | 212.1503333 |
| Fezf1         | chr6:23195046-23198264    | 162.9546667 | 1.1872704   |
| Leng8         | chr7:4088657-4099775      | 162.54      | 108.2374    |
| Cat           | chr2:103294060-103325310  | 162.174     | 131.7866667 |
| Prrc2c        | chr1:164601915-164670687  | 161.4513333 | 135.9233333 |
| Dhrs1         | chr14:56357856-56364521   | 160.821     | 179.9298    |
| Six1          | chr12:74142813-74147699   | 160.808     | 234.851     |
| Smpdl3a       | chr10:57514349-57531636   | 160.7923333 | 37.41496667 |
| Atp5c1        | chr2:9977658-10002137     | 160.6986667 | 150.4566667 |
| Skp1a         | chr11:52045496-52060360   | 160.109     | 169.642     |
| lfitm3        | chr7:148195488-148196643  | 159.951     | 167.4413333 |
| Gcnt2         | chr13:40955136-41056261   | 159.465     | 23.07506667 |
| Anapc13       | chr9:102528625-102536574  | 158.8333333 | 195.4753333 |
| Rab2a         | chr4:8462790-8534849      | 156.8716667 | 202.2806667 |
| Mctp1         | chr13:76522408-77171071   | 156.1116667 | 87.92126667 |
| 4833423E24Rik | chr2:85324248-85359092    | 155.9836667 | 90.5057     |
| B230120H23Rik | chr2:72123693-72280667    | 155.7633333 | 69.48153333 |
| Pfdn5         | chr15:102156546-102161920 | 155.2808667 | 136.9760667 |
| Tas2r129      | chr6:132901119-132902082  | 154.8986667 | 0.044685333 |
| Cnfn          | chr7:26152634-26154743    | 154.5168333 | 368.0671    |
| Olfr461       | chr6:40494034-40494976    | 154.0423    | 63.82053333 |
| Ndufa4        | chr6:11850372-11857446    | 153.5429333 | 236.032     |
| Snhg1         | chr19:8797976-8800816     | 153.0112    | 217.694     |
| Rpl14         | chr9:120480633-120483770  | 152.428     | 233.8656667 |

|               |                           |             |             |
|---------------|---------------------------|-------------|-------------|
| Snora75       | chr1:88247744-88247860    | 152.1024667 | 78.14076667 |
| Hsp90aa1      | chr12:111929245-111934605 | 151.817     | 183.6463667 |
| Tcf25         | chr8:125897652-125928073  | 151.781     | 107.9976    |
| Tas2r113      | chr6:132843028-132843958  | 151.7733333 | 0.105871333 |
| Cuta          | chr17:27074916-27076423   | 150.9821667 | 126.7442667 |
| Satb2         | chr1:56850824-57028178    | 150.8993333 | 76.50846667 |
| Mrps21        | chr3:95666574-95674542    | 150.7883333 | 151.6316667 |
| Anxa6         | chr11:54792463-54846973   | 150.5016667 | 46.16126667 |
| Rps18         | chr17:34088943-34092586   | 150.4346667 | 261.4606667 |
| H2-K1         | chr17:34132956-34137278   | 150.194     | 178.7363333 |
| Cd164         | chr10:41239305-41250848   | 149.591     | 201.988     |
| Rps23         | chr13:91062726-91064337   | 149.5823333 | 202.324     |
| Ctnnd1        | chr2:84440937-84490897    | 149.241     | 177.533     |
| 2310003F16Rik | chr2:121282823-121284176  | 149.1879333 | 66.86226333 |
| Fbxo25        | chr8:13907805-13940521    | 148.1503333 | 34.53076333 |
| Rps10         | chr17:27767373-27772187   | 148.059     | 236.0353333 |
| Fam36a        | chr1:180249283-180252824  | 147.4953333 | 64.69406667 |
| Gabarap       | chr11:69804871-69808451   | 147.3884333 | 106.9737667 |
| Atp5j         | chr16:84828115-84835819   | 147.2819    | 127.4924    |
| Gm7534        | chr4:133746718-133758919  | 147.0183333 | 8.977533333 |
| Ttll10        | chr4:155408945-155424926  | 146.8643333 | 30.43376667 |
| Hint1         | chr11:54679939-54683998   | 146.7101    | 115.5678667 |
| Hspa4         | chr11:53073315-53113981   | 146.6033333 | 110.9742    |
| Klf7          | chr1:64082246-64167963    | 146.4736667 | 53.66183333 |
| Mpp6          | chr6:50060239-50148597    | 145.8201333 | 37.24656667 |
| Pla2g16       | chr19:7631948-7663035     | 145.342     | 43.57293333 |
| Atp1a1        | chr3:101380141-101408630  | 145.038     | 350.3636667 |
| Inpp5b        | chr4:124419121-124478755  | 144.782     | 158         |
| Gnb2l1        | chr11:48613861-48619743   | 144.1983333 | 238.6796667 |
| Plagl1        | chr10:12810593-12851501   | 144.0186667 | 176.2956667 |
| Krt17         | chr11:100117530-100122303 | 143.9204667 | 42.49933333 |
| Atp5g3        | chr2:73746506-73749351    | 143.3796667 | 167.5123333 |
| Srp14         | chr2:118301578-118305432  | 143.29      | 115.4119333 |
| Uqcrcq        | chr11:53242449-53244333   | 143.2703333 | 129.0910667 |
| Rpl36         | chr17:56752817-56753669   | 142.8666667 | 182.6116667 |
| Atp5d         | chr10:79605059-79608563   | 142.8653333 | 206.4116667 |
| Cdc42         | chr4:136875610-136913674  | 142.4936667 | 167.413     |
| Matk          | chr10:80720289-80725726   | 142.3976667 | 87.11763333 |
| Ywhah         | chr5:33361464-33370615    | 141.4993333 | 80.38136667 |
| Pdma7         | chr2:179771080-179777107  | 141.474     | 162.6173333 |
| S100a11       | chr3:93324417-93330210    | 141.3843333 | 383.5653333 |
| Rps6          | chr4:86500002-86503271    | 141.3543333 | 255.687     |
| Ehf           | chr2:103103589-103143353  | 140.9026667 | 61.2893     |
| Luc7l3        | chr11:94152452-94183225   | 140.784     | 97.54703333 |
| D4Wsu53e      | chr4:134479539-134483285  | 140.3216667 | 101.1872667 |
| Elf3          | chr1:137150150-137155049  | 140.2916667 | 104.9259667 |
| Pnn           | chr12:60167905-60175004   | 140.2476667 | 85.92126667 |
| Ik            | chr18:36904309-36917293   | 139.8426667 | 122.6356333 |
| 1810046J19Rik | chr11:98299021-98300302   | 139.3346667 | 206.4283333 |
| Tppp3         | chr8:107991391-107995322  | 138.8736667 | 249.7676667 |
| Gm5506        | chr4:149611432-149622982  | 138.614     | 64.87386667 |
| Hspa1a        | chr17:35106303-35109101   | 138.2346667 | 112.5477333 |

|               |                           |             |             |
|---------------|---------------------------|-------------|-------------|
| Fut2          | chr7:52903964-52921678    | 138.195     | 60.2511     |
| Fau           | chr19:6057887-6059524     | 138.0863333 | 185.4543333 |
| Upp1          | chr11:9018010-9036173     | 137.1049    | 102.3151    |
| Cd300lf       | chr11:114977527-114995306 | 137.0327667 | 15.68669667 |
| Cdadc1        | chr14:60178224-60216796   | 136.9253333 | 50.6563     |
| Rps3          | chr7:106626406-106632219  | 136.179     | 275.9533333 |
| Snora44       | chr4:131865867-131865984  | 136.1416667 | 0           |
| Rpl35         | chr2:38857100-38860651    | 136.129     | 161.095     |
| Fkbp1a        | chr2:151368234-151387427  | 135.924     | 164.9311333 |
| Cstb          | chr10:77888414-77890367   | 135.8273333 | 141.4155    |
| Gpx3          | chr11:54716354-54723889   | 135.762     | 185.9686667 |
| Pnrc1         | chr4:33332397-33335762    | 135.7556667 | 78.9192     |
| Hist1h1c      | chr13:23830675-23832236   | 135.2531667 | 53.37386667 |
| Fam25c        | chr14:35165067-35168579   | 135.1806667 | 261.8663333 |
| Krt5          | chr15:101537500-101543322 | 135.0313333 | 258.8473333 |
| Tmbim6        | chr15:99223377-99240480   | 134.9886667 | 139.448     |
| Klf6          | chr13:5860734-5869639     | 134.8958333 | 171.229     |
| Vamp8         | chr6:72335214-72340661    | 134.8549333 | 117.2702333 |
| Spnb2         | chr11:29999394-30119772   | 134.756     | 116.6315333 |
| Rbm39         | chr2:155972974-156005976  | 134.6033333 | 108.7697    |
| Polr1d        | chr5:147889116-147922935  | 134.2736667 | 131.4473333 |
| Aldh3a2       | chr11:61058256-61080629   | 134.1633333 | 75.32746667 |
| Bccip         | chr7:140901015-140912828  | 134.0727    | 46.75993333 |
| Ogt           | chrX:98835402-98879690    | 133.9306667 | 104.5524    |
| Ndufc2        | chr7:104548512-104556310  | 133.8456667 | 93.3295     |
| Mcl1          | chr3:95462642-95467101    | 132.9143333 | 111.9583333 |
| Rnh1          | chr7:148346224-148358750  | 132.8633333 | 85.4893     |
| Ly6e          | chr15:74785480-74790335   | 132.0524667 | 140.81      |
| Dbi           | chr1:122009856-122017673  | 131.9986667 | 343.8133333 |
| Edf1          | chr2:25413419-25417602    | 131.7243333 | 191.183     |
| Rrp1          | chr10:77863106-77875788   | 131.1763333 | 102.1991    |
| Rps28         | chr17:33959981-33961443   | 130.8283333 | 308.3306667 |
| B2m           | chr2:121973422-121978818  | 130.4572333 | 159.9866667 |
| Golga4        | chr9:118415435-118491637  | 130.3473333 | 79.3539     |
| App           | chr16:84954680-85173952   | 130.2996667 | 87.987      |
| Cul4a         | chr8:13105720-13147939    | 130.2743333 | 86.27356667 |
| 4933407C03Rik | chr8:119780918-119985405  | 130.051     | 102.9570667 |
| Cd81          | chr7:150238654-150253835  | 129.8726667 | 199.911     |
| Gm15772       | chr11:68715090-68718036   | 129.8707333 | 198.2363333 |
| Hnrnpu        | chr1:180258430-180267915  | 129.1946667 | 111.5592667 |
| Nfe2l2        | chr2:75513575-75542698    | 128.8591333 | 168.5633333 |
| 1500009L16Rik | chr10:83185609-83225507   | 128.5249    | 25.67653333 |
| Chmp2a        | chr7:13617354-13620126    | 128.4976667 | 79.60873333 |
| Bsg           | chr10:79167102-79174724   | 128.3027333 | 152.8056667 |
| Btg1          | chr10:96079634-96085445   | 128.2063333 | 158.852     |
| Rbm5          | chr9:107642825-107673333  | 128.0127667 | 103.4900333 |
| Cul3          | chr1:80263392-80337005    | 127.903     | 117.5764667 |
| Nrxn3         | chr12:89961319-91573373   | 127.7626667 | 17.65543333 |
| Ndufa3        | chr7:3568974-3571763      | 127.5869667 | 113.3256667 |
| Itpr3         | chr17:27194248-27259168   | 127.4406667 | 171.2756667 |
| Sfrs18        | chr4:21774729-21803622    | 127.339     | 80.8977     |
| Tas2r119      | chr15:32107043-32108049   | 127.269     | 3.037623667 |



|               |                           |             |             |
|---------------|---------------------------|-------------|-------------|
| Arhgdia       | chr11:120438548-120442934 | 127.0756667 | 109.9767667 |
| Gm12191       | chr15:34370260-34372988   | 126.7406667 | 228.0196667 |
| Kif1b         | chr4:148550429-148681807  | 125.4016667 | 92.76883333 |
| Cst3          | chr2:148697467-148701204  | 125.0543333 | 168.7073333 |
| Son           | chr16:91648068-91679437   | 124.844     | 138.8226667 |
| Capzb         | chr4:138748845-138847727  | 124.5473333 | 87.3736667  |
| Atxn2l        | chr7:133635221-133646816  | 124.2216333 | 104.1597333 |
| Psmc5         | chr11:106117498-106124426 | 123.7111    | 106.2181667 |
| Ier2          | chr8:87185229-87186751    | 123.4178333 | 92.68653333 |
| Cox7a2l       | chr17:83901256-83913673   | 123.3844667 | 199.586     |
| Mgll          | chr6:88674405-88778354    | 122.579     | 3.632346667 |
| Reep5         | chr18:34504539-34533069   | 122.321     | 32.62723333 |
| Nfe2l1        | chr11:96678727-96691282   | 122.293     | 91.1133     |
| Slc25a3       | chr10:90579322-90586708   | 122.187     | 154.2203333 |
| Hmgn1         | chr16:96343194-96349332   | 121.9521333 | 142.5       |
| Cox5a         | chr9:57369038-57380233    | 121.8876333 | 120.9291333 |
| Rpl18         | chr7:52973440-52976205    | 121.651     | 195.869     |
| Baz2b         | chr2:59737419-59963797    | 121.4516667 | 74.367      |
| Bola2         | chr7:133839513-133840207  | 121.3007667 | 71.96533333 |
| Chchd2        | chr5:130357031-130363340  | 121.0846667 | 142.0295667 |
| Spna2         | chr2:29821079-29886970    | 121.0013333 | 83.73176667 |
| 6820431F20Rik | chr8:19991155-20020278    | 120.7233333 | 101.9567667 |
| Calml4        | chr9:62705910-62723724    | 120.4713333 | 44.42766667 |
| Mbd2          | chr18:70727945-70785785   | 120.3736    | 80.46726667 |
| Ddx3x         | chrX:12858147-12871109    | 120.2493333 | 138.0488    |
| Dnajb1        | chr8:86132073-86135802    | 120.1758    | 205.3493333 |
| Clmn          | chr12:106001323-106103286 | 120.1736667 | 101.4894667 |
| Hnrnpab       | chr11:51413601-51420383   | 120.1434333 | 151.0093333 |
| Cox7a2        | chr9:79603047-79607660    | 120.1413333 | 110.1324667 |
| Slc25a5       | chrX:34335646-34338801    | 120.136     | 172.6053333 |
| Kif5b         | chr18:6201002-6241522     | 120.012     | 131.3781667 |
| H2afz         | chr3:137527562-137529886  | 119.4623333 | 88.80943333 |
| Mdh2          | chr5:136254518-136266256  | 119.3836667 | 153.8543333 |
| Clk1          | chr1:58468831-58480932    | 119.1515333 | 184.7386667 |
| Slc25a4       | chr8:47292697-47296363    | 119.097     | 103.5434667 |
| Sptlc2        | chr12:88648838-88729180   | 119.0896667 | 107.9955667 |
| Hap1          | chr11:100208640-100217455 | 119.048     | 47.89483333 |
| Hnrnp3        | chr10:62477411-62486597   | 118.9524    | 55.95453333 |
| Rpl13         | chr8:125626249-125629142  | 118.9152    | 149.5326667 |
| Ephb4         | chr5:137791336-137815750  | 118.6203333 | 98.52126667 |
| Serpnb6a      | chr13:34009786-34094663   | 118.3506667 | 37.02203333 |
| Hipk1         | chr3:103543737-103595198  | 118.0633333 | 77.66746667 |
| Rps25         | chr9:44215796-44218489    | 117.933     | 166.791     |
| Tas2r107      | chr6:131609175-131610102  | 117.846     | 0           |
| Mgea5         | chr19:45824748-45857781   | 117.5787    | 121.6146667 |
| 2300002M23Rik | chr17:35704429-35705890   | 117.5723333 | 45.44676667 |
| Snora47       | chr13:96100565-96100691   | 117.526     | 11.96113333 |
| Rpl19         | chr11:97888023-97891807   | 117.1066667 | 165.0046667 |
| Bpgm          | chr6:34426355-34455610    | 117.1059667 | 138.8283333 |
| Cbr2          | chr11:120590798-120593335 | 117.0854667 | 247.3937    |
| Flrt3         | chr2:140483933-140497212  | 117.0019    | 29.86106667 |
| Tnfaip8       | chr18:50139080-50252883   | 116.6280333 | 35.159      |

|               |                           |             |             |
|---------------|---------------------------|-------------|-------------|
| Arhgef2       | chr3:88420128-88451974    | 116.554     | 83.8006     |
| Tas2r109      | chr6:132930032-132930983  | 116.3148    | 0.205739    |
| Cetn3         | chr13:81922290-81936156   | 116.2407333 | 137.4696667 |
| Psmb4         | chr3:94688245-94690880    | 116.0316667 | 162.0256667 |
| Eif5a         | chr11:69730213-69735460   | 115.7552    | 214.8976667 |
| Vps25         | chr11:101115056-101120860 | 115.5982    | 66.53786667 |
| Espn          | chr4:151494984-151526316  | 115.2865667 | 71.92903333 |
| Tax1bp1       | chr6:52663722-52716773    | 115.2707    | 128.5546667 |
| Gm5506        | chr18:48204988-48208037   | 115.1022333 | 52.69056667 |
| Prdx2         | chr8:87493546-87498212    | 115.0906333 | 136.512     |
| Mll5          | chr5:22940246-23010047    | 114.887     | 91.64756667 |
| Tas2r143      | chr6:42350236-42351118    | 114.8487    | 20.062826   |
| Prrc2b        | chr2:32006667-32090057    | 114.6413333 | 92.3205     |
| Tas2r144      | chr6:42165326-42166286    | 114.5945667 | 0.089728    |
| Tmem65        | chr15:58613823-58654982   | 114.5553333 | 57.044      |
| Tmem59        | chr4:106851234-106873601  | 114.4073333 | 125.2986667 |
| 2510006D16Rik | chr4:129277950-129285123  | 114.4021667 | 86.38466667 |
| Atp2a2        | chr5:122903521-122952234  | 114.3424333 | 122.4271    |
| Tas1r3        | chr4:155233378-155237462  | 114.2756667 | 671.469     |
| Myeov2        | chr1:94533721-94538562    | 114.2169333 | 78.76116667 |
| Asna1         | chr8:87541829-87549177    | 114.1290333 | 61.76576667 |
| Eif3c         | chr7:133690424-133709880  | 114.1023333 | 83.02643333 |
| lfi27l1       | chr12:104672398-104678455 | 113.9343667 | 100.5709    |
| Rpl7          | chr1:16091375-16094514    | 113.8323    | 166.2323333 |
| Actr3         | chr1:127289481-127332304  | 113.556     | 82.02376667 |
| Cox7b         | chrX:103211038-103217789  | 113.5090667 | 122.9958    |
| Psmab6        | chr12:56499811-56519446   | 112.8377667 | 141.3779    |
| Eif3g         | chr9:20698792-20703034    | 112.3932667 | 125.9156667 |
| Cpe           | chr8:67071348-67171837    | 112.298     | 134.4226667 |
| Rps8          | chr4:116826440-116828737  | 112.2816667 | 146.8493333 |
| Gdpc1         | chr11:86847295-86887639   | 111.8022    | 97.00563333 |
| Ccdc104       | chr11:29121535-29147272   | 111.4936667 | 90.53313333 |
| Ostf1         | chr19:18654853-18706303   | 111.4227667 | 41.68606667 |
| Atp6v0d1      | chr8:108048369-108089940  | 111.28      | 92.02883333 |
| Rab10         | chr12:3247427-3309969     | 111.2033333 | 129.0126333 |
| Snhg3         | chr4:131907847-131909601  | 110.9203333 | 45.62676667 |
| Snord22       | chr19:8800355-8800481     | 110.6394667 | 293.3053333 |
| Papss1        | chr3:131227731-131306635  | 110.5238333 | 39.6188     |
| Dgki          | chr6:36796021-37249976    | 110.516     | 90.35496667 |
| Brd2          | chr17:34248963-34259552   | 110.4056667 | 125.369     |
| Baiap2l1      | chr5:145025393-145118981  | 110.3188333 | 19.041      |
| Ddx39b        | chr17:35378690-35390652   | 109.7804    | 92.7863     |
| Csde1         | chr3:102824468-102862112  | 109.6712    | 122.4096667 |
| Spint2        | chr7:30041348-30066996    | 109.6377667 | 131.2376667 |
| Atp5j2        | chr5:145944574-145952461  | 109.6124667 | 114.5051333 |
| Apobec1       | chr6:122527809-122552462  | 109.4942333 | 21.47015667 |
| Cct2          | chr10:116488053-116500870 | 109.4210333 | 124.4709333 |
| Psmb7         | chr2:38443565-38499426    | 109.3148667 | 150.189     |
| Rac1          | chr5:144266348-144288861  | 108.8175    | 153.847     |
| Ppp1ca        | chr19:4192173-4195419     | 108.8102    | 124.8541333 |
| Calr          | chr8:87365986-87370830    | 108.702     | 223.5266667 |
| Papola        | chr12:107022911-107077153 | 108.3156667 | 86.90046667 |

|               |                           |             |             |
|---------------|---------------------------|-------------|-------------|
| S100a1        | chr3:90314955-90318252    | 108.1206333 | 69.21124    |
| Pip5k1b       | chr19:24369285-24630317   | 108.0326667 | 90.24656667 |
| Lpcat4        | chr2:112079997-112087268  | 108.0087333 | 202.1573333 |
| Prox1         | chr1:191945657-191994559  | 107.9739    | 115.5866667 |
| Cadps2        | chr6:23212773-23789421    | 107.9299    | 283.519     |
| Fam49a        | chr12:12268944-12383167   | 107.9094333 | 40.12866667 |
| Sec24b        | chr3:129686102-129763825  | 107.3996667 | 67.2856     |
| Ptp4a2        | chr4:129497722-129527247  | 107.3886    | 156.7446667 |
| Rplp2         | chr7:148633548-148637241  | 107.3257333 | 158.414     |
| Alcam         | chr16:52249108-52453110   | 107.1187333 | 77.16306667 |
| 2810403A07Rik | chr3:88489715-88516855    | 106.8474333 | 65.59243333 |
| Prkar1a       | chr11:109512262-109530962 | 106.8186667 | 89.5021     |
| Atox1         | chr11:55260144-55274640   | 106.5927333 | 95.23076667 |
| Dctn3         | chr4:41661829-41670195    | 106.0630333 | 124.2293667 |
| Rexo2         | chr9:48276618-48288716    | 106.0284333 | 75.57816667 |
| Hsph1         | chr5:150419419-150438890  | 105.9827667 | 130.9726667 |
| Rpl7a         | chr2:26766326-26768831    | 105.8184667 | 165.5526667 |
| Ano10         | chr9:122084996-122203492  | 105.8015667 | 28.0666     |
| Fxyd3         | chr7:31855553-31861716    | 105.6855667 | 92.22593333 |
| Tubb4b        | chr2:25077677-25080222    | 105.3305    | 126.1213333 |
| Rpl11         | chr4:135605862-135609286  | 105.2647    | 159.9056667 |
| Hist2h2be     | chr3:96025043-96027661    | 105.1433667 | 51.6399     |
| Rtn3          | chr19:7500390-7557779     | 105.0566667 | 131.2356667 |
| Tagln2        | chr1:174430376-174437506  | 104.4584333 | 320.036     |
| Prpf38b       | chr3:108705724-108714622  | 104.3215333 | 99.0688     |
| Ddit4l        | chr3:137286635-137291296  | 104.2232333 | 45.3825     |
| BC031181      | chr18:75165553-75169587   | 103.9158667 | 139.2771    |
| Vps28         | chr15:76452517-76456457   | 103.8171333 | 73.4987     |
| Eif5b         | chr1:38054854-38112424    | 103.6306667 | 66.70733333 |
| Snora70       | chrX:71517830-71517959    | 103.5938667 | 165.6328667 |
| Ckmt1         | chr2:121184376-121189473  | 103.5198333 | 54.934      |
| Sort1         | chr3:108087049-108164429  | 103.4426    | 93.24256667 |
| Rpl37a        | chr1:72757833-72760387    | 102.9118    | 124.5443667 |
| Dpy30         | chr17:74698813-74723284   | 102.7056667 | 109.4006667 |
| Ssbp1         | chr6:40421413-40431822    | 102.7014333 | 65.34793333 |
| Higd2a        | chr13:54691591-54692508   | 102.6088333 | 116.467     |
| Myst3         | chr8:23970010-24053734    | 102.5387    | 61.70076667 |
| Atp6ap1       | chrX:71542435-71550060    | 102.3437667 | 101.6369333 |
| Cs            | chr10:127774887-127799535 | 102.3352333 | 82.2919     |
| Rsrc2         | chr5:124178438-124199421  | 102.1220333 | 96.44396667 |
| Ywhab         | chr2:163820932-163844323  | 102.0684333 | 121.382     |
| Sar1b         | chr11:51577164-51605455   | 102.008     | 57.63093333 |
| Atp6v1d       | chr12:79943968-79962625   | 101.9119667 | 59.8175     |
| Sumo1         | chr1:59696277-59727678    | 101.8571    | 88.00553333 |
| Gm12657       | chr4:94260340-94267010    | 101.6904667 | 108.5293333 |
| Atp6v1f       | chr6:29417782-29420509    | 101.5073667 | 58.3427     |
| Atat1         | chr17:36034540-36047013   | 101.403     | 41.5333     |
| Lin7c         | chr2:109731034-109741093  | 101.1710333 | 80.72556667 |
| Tsr1          | chr11:74711581-74722842   | 100.8873667 | 59.8936     |
| Prelid1       | chr13:55423415-55426633   | 100.6136333 | 87.98026667 |
| Rbm15b        | chr9:106786315-106789331  | 100.5661667 | 18.00831667 |
| Tpr           | chr1:152239967-152297065  | 100.3511333 | 105.5367333 |

|               |                           |             |             |
|---------------|---------------------------|-------------|-------------|
| Hspd1         | chr1:55134677-55144776    | 100.2593333 | 88.07866667 |
| Hspa4l        | chr3:40549534-40594287    | 100.2086667 | 61.74656667 |
| 1110007C09Rik | chr13:49298319-49311395   | 100.1614667 | 77.56596667 |
| Rab6a         | chr7:107756099-107789782  | 100.0337667 | 66.61443333 |
| Gatad2b       | chr3:90145575-90162042    | 99.87173333 | 96.29533333 |
| Rpl18a        | chr8:73418620-73421342    | 99.7618     | 199.6913333 |
| Rpl13a        | chr7:52380932-52384115    | 99.45043333 | 161.973     |
| Nrbp2         | chr15:75916023-75920443   | 99.4396     | 125.682     |
| Tmed9         | chr13:55694495-55699055   | 99.19766667 | 167.723     |
| Tmem176b      | chr6:48783810-48791373    | 99.16046667 | 214.602     |
| Scarna3b      | chr12:81492600-81492724   | 98.97633333 | 26.5166     |
| Dtna          | chr18:23573915-23818215   | 98.8932     | 34.8813     |
| AI848100      | chr1:163746242-163806792  | 98.53663333 | 56.155      |
| Psmb2         | chr4:126354886-126386959  | 98.32023333 | 131.8859    |
| Abhd14b       | chr9:106350970-106355249  | 98.29256667 | 13.49648    |
| Clta          | chr4:44025514-44045718    | 98.18443333 | 92.38896667 |
| Mrpl52        | chr14:55045745-55048587   | 98.17663333 | 107.9998667 |
| Heatr7b1      | chr1:90123594-90158864    | 97.93946667 | 17.88470333 |
| AI597468      | chr10:84565371-84580492   | 97.61426667 | 135.1233    |
| Atf7ip        | chr6:136467371-136555900  | 97.5955     | 119.3110333 |
| Pdcd6ip       | chr9:113560861-113617377  | 97.57733333 | 42.94616667 |
| Cldn7         | chr11:69778280-69781388   | 97.5229     | 69.7942     |
| Csnk1a1       | chr18:61715235-61747953   | 97.48963333 | 123.6286667 |
| Snora65       | chr2:32818820-32818938    | 97.26216667 | 85.38183333 |
| Akirin2       | chr4:34497863-34514157    | 97.23083333 | 44.21686667 |
| Cct6a         | chr5:130293260-130322231  | 97.1525     | 110.9210333 |
| Mtap1b        | chr13:100191418-100286557 | 97.0392     | 110.8243333 |
| Rpl10         | chrX:71516154-71518474    | 97.02383333 | 155.3956667 |
| Cfdp1         | chr8:114292372-114378210  | 97.00096667 | 78.8728     |
| Cpm           | chr10:117066555-117124408 | 96.9072     | 15.34846667 |
| Chchd10       | chr10:75398317-75400479   | 96.8673     | 67.71943333 |
| Il10          | chr1:132916421-132921547  | 96.65323333 | 23.3909     |
| Trim44        | chr2:102140275-102241057  | 96.5843     | 97.0436     |
| Mrpl30        | chr1:37947397-37955178    | 96.53286667 | 81.7688     |
| Msln          | chr17:25885557-25891272   | 96.52483333 | 58.97553333 |
| Eif5          | chr12:112776311-112784964 | 96.41276667 | 97.0233     |
| Ypel2         | chr11:86749926-86807264   | 96.13176667 | 85.1871     |
| Tra2a         | chr6:49193919-49214051    | 96.01773333 | 97.62306667 |
| Cyp2f2        | chr7:27904973-27918679    | 95.8223     | 385.4753    |
| Grcc10        | chr6:124689201-124691097  | 95.75553333 | 119.9968667 |
| Aldh3a1       | chr11:61022243-61031918   | 95.51233333 | 137.703     |
| Lrrfip1       | chr1:92895303-93025521    | 95.3671     | 60.80483333 |
| Mfsd6         | chr1:52713147-52784162    | 95.25106667 | 118.372     |
| Llph          | chr10:119664115-119669126 | 95.1257     | 50.13066667 |
| Rgs2          | chr1:145846467-145851279  | 94.97236667 | 47.55373333 |
| Kcnip3        | chr2:127282233-127347106  | 94.82793333 | 71.14736667 |
| Rab25         | chr3:88345950-88352201    | 94.79676667 | 117.2144    |
| Ctsl          | chr13:64464521-64471614   | 94.61696667 | 53.00416667 |
| Vdac1         | chr11:52174616-52202898   | 94.55776667 | 136.1296333 |
| Eif4a1        | chr11:69480437-69485925   | 94.42296667 | 141.2043333 |
| Ndufa7        | chr17:33961558-33975258   | 94.28036667 | 82.47226667 |
| Zfp609        | chr9:65539389-65675371    | 94.1163     | 54.47683333 |

|               |                           |             |             |
|---------------|---------------------------|-------------|-------------|
| A630073D07Rik | chr6:132575128-132577529  | 94.09416667 | 0           |
| Tas2r126      | chr6:42384533-42385460    | 94.0679     | 207.1616667 |
| Eef1b2        | chr1:63223404-63227060    | 93.96576667 | 113.6571    |
| Sec11a        | chr7:88060264-88092436    | 93.9265     | 45.46563333 |
| Gpx1          | chr9:108241410-108242673  | 93.90666667 | 98.44073333 |
| Pof1b         | chrX:109752035-109812260  | 93.75793333 | 68.69086667 |
| Actr2         | chr11:19962306-20012954   | 93.46093333 | 71.9141     |
| Itga3         | chr11:94905795-94938028   | 93.39373333 | 76.2701     |
| Snpc5         | chr9:64027103-64030495    | 93.22833333 | 53.1679     |
| Caprin1       | chr2:103603101-103637797  | 93.16903333 | 106.7198    |
| Tspan1        | chr4:115834485-115840203  | 93.0806     | 73.25893333 |
| Ceacam1       | chr7:26246720-26262644    | 93.02633333 | 53.93616667 |
| Serbp1        | chr6:67216972-67239296    | 92.86446667 | 88.45903333 |
| Ctsd          | chr7:149561820-149573775  | 92.8408     | 134.7513333 |
| Fam120a       | chr13:48974585-49063197   | 92.81286667 | 78.11656667 |
| Dusp11        | chr6:85892262-85911661    | 92.81046667 | 63.60803333 |
| Ncl           | chr1:88241293-88256030    | 92.66493333 | 82.17356667 |
| Ndufv3        | chr17:31657059-31668270   | 92.6271     | 142.0213333 |
| Ndfip1        | chr18:38578628-38624060   | 92.51496667 | 92.36993333 |
| Ctnna1        | chr18:35278565-35414429   | 92.35823333 | 119.4766667 |
| Rpl17         | chr18:75160130-75163035   | 92.33883333 | 129.9824    |
| Lamp2         | chrX:35758240-35809632    | 92.28313333 | 126.4636    |
| 1810019D21Rik | chr8:108659299-108662622  | 92.04846667 | 85.5545     |
| 4833439L19Rik | chr13:54652578-54666743   | 91.95403333 | 135.8854    |
| Rps27         | chr3:90016588-90017570    | 91.94926667 | 5.873362667 |
| Rpl3          | chr15:79908210-79913836   | 91.87586667 | 127.149     |
| Tbcb          | chr7:31009149-31017048    | 91.84856667 | 107.2016    |
| Etl4          | chr2:20211539-20732162    | 91.835      | 67.6122     |
| Eid1          | chr2:125498835-125501378  | 91.8313     | 94.8664     |
| Irf6          | chr1:194979305-194998229  | 91.7537     | 67.1495     |
| Rod1          | chr4:59484739-59562236    | 91.70063333 | 103.7822    |
| Enpp5         | chr17:44215794-44223510   | 91.6032     | 84.4483     |
| Gfra2         | chr14:71289936-71379645   | 91.49133333 | 102.5571667 |
| Fat1          | chr8:46035561-46137611    | 91.42466667 | 163.278     |
| Smarcc2       | chr10:127896291-127927230 | 91.3897     | 78.3519     |
| Calm4         | chr13:3837002-3837917     | 91.2499     | 148.5777    |
| Eif3i         | chr4:129269217-129277892  | 91.22473333 | 114.566     |
| Ric8b         | chr10:84380360-84479192   | 90.96466667 | 57.8422     |
| Stx4a         | chr7:134985321-134992479  | 90.70893333 | 66.1333     |
| H1f0          | chr15:78858641-78860930   | 90.68713333 | 123.8380667 |
| Dync1h1       | chr12:111839604-111905154 | 90.5938     | 92.00066667 |
| Nsfl1c        | chr2:151320043-151337040  | 90.5706     | 71.9083     |
| Prdx1         | chr4:116358203-116372605  | 90.55973333 | 131.178     |
| Adnp          | chr2:168006464-168032562  | 90.462      | 68.32753333 |
| Fis1          | chr5:137429144-137442104  | 90.46183333 | 55.11836667 |
| Syf2          | chr4:134486894-134493452  | 90.45896667 | 48.438      |
| Cebpg         | chr7:35831440-35841585    | 90.4088     | 48.79203333 |
| Pabpn1        | chr14:55512979-55517764   | 90.40266667 | 82.32183333 |
| Mir24-2       | chr8:86732713-86732820    | 90.30966667 | 0           |
| Trak1         | chr9:121276075-121384036  | 90.29463333 | 78.94763333 |
| Tpi1          | chr6:124760609-124764314  | 90.23346667 | 70.0063     |
| Atp5g2        | chr15:102493298-102501478 | 90.13803333 | 89.04923333 |

|               |                           |             |             |
|---------------|---------------------------|-------------|-------------|
| Dnm2          | chr9:21229351-21312203    | 90.02016667 | 50.50616667 |
| Pqlc3         | chr12:16995453-17006924   | 89.9191     | 31.637      |
| Pirt          | chr11:66725492-66742202   | 89.9047     | 155.0683333 |
| Trp53inp2     | chr2:155207591-155215583  | 89.89956667 | 91.3763     |
| Ppp3cc        | chr14:70617704-70689256   | 89.86943333 | 19.84647333 |
| Myo1d         | chr11:80295628-80593527   | 89.85853333 | 30.26146667 |
| Kctd13        | chr7:134072392-134089123  | 89.6597     | 77.94233333 |
| 6820431F20Rik | chr8:19863863-19893010    | 89.3626     | 72.41806667 |
| Cobll1        | chr2:64926395-65076683    | 89.33923333 | 53.1438     |
| Cmpk1         | chr4:114633217-114659833  | 89.21973333 | 105.2428333 |
| Pebp1         | chr5:117732659-117737573  | 89.05586667 | 94.01236667 |
| Tox3          | chr8:92771010-92872151    | 88.68233333 | 73.7732     |
| Pdia3         | chr2:121239637-121264422  | 88.549      | 239.2933333 |
| Rhob          | chr12:8504564-8506791     | 88.46093333 | 117.4033667 |
| Trappc3       | chr4:125939648-125953127  | 88.34676667 | 72.93203333 |
| Sfpq          | chr4:126698544-126714258  | 88.24836667 | 112.2654    |
| 4933437F05Rik | chr12:88562072-88579551   | 88.22013333 | 7.54835     |
| Rpl5          | chr5:108329546-108338024  | 88.03       | 168.6453333 |
| 1600029D21Rik | chr9:50302629-50313744    | 87.99973333 | 102.8618    |
| Gsto1         | chr19:47929478-47939278   | 87.8027     | 172.398     |
| Htatif2       | chr7:57014475-57029369    | 87.6792     | 37.96243333 |
| Dnajb11       | chr16:22857917-22879707   | 87.42136667 | 93.84453333 |
| Krcc1         | chr6:71222012-71235313    | 87.38936667 | 53.5644     |
| Bptf          | chr11:106894394-106993236 | 87.2813     | 41.32983333 |
| Trappc1       | chr11:69137487-69139295   | 87.2398     | 139.2369    |
| Dctn6         | chr8:35153476-35171565    | 87.22493333 | 75.50333333 |
| Pkp1          | chr1:137767971-137815601  | 87.0955     | 135.752     |
| Tas2r115      | chr6:132687071-132688004  | 87.05543333 | 0.139620667 |
| 1500032L24Rik | chr15:82176475-82179492   | 86.9425     | 161.8963333 |
| Oxct1         | chr15:3976427-4105344     | 86.90826667 | 53.29583333 |
| Ucp2          | chr7:107641853-107650682  | 86.8871     | 106.2558667 |
| 1810037I17Rik | chr3:122627314-122629112  | 86.86836667 | 61.7412     |
| Rpl9          | chr5:65779602-65782670    | 86.743      | 109.2770333 |
| Srrm1         | chr4:134876398-134909129  | 86.70916667 | 63.13403333 |
| Thoc7         | chr14:14781527-14793739   | 86.62383333 | 91.45956667 |
| Rbm25         | chr12:84973183-85024073   | 86.56223333 | 77.6026     |
| Lamtor2       | chr3:88353740-88356849    | 86.4948     | 49.51903333 |
| 0610009B22Rik | chr11:51498886-51502136   | 86.35203333 | 93.6067     |
| Crym          | chr7:127329897-127345502  | 86.26453333 | 81.2579     |
| Rpl23         | chr11:97638839-97643753   | 86.15423333 | 111.4276667 |
| Lasp1         | chr11:97660985-97700078   | 86.13783333 | 101.7141    |
| Clcn3         | chr8:63389185-63462108    | 86.08523333 | 54.44966667 |
| Epha7         | chr4:28740294-28894649    | 86.0749     | 137.354     |
| Polr2g        | chr19:8867618-8873047     | 86.03353333 | 61.1665     |
| Uba1          | chrX:20235546-20260305    | 85.86066667 | 86.8408     |
| Romo1         | chr2:155969888-155971530  | 85.85286667 | 111.6826667 |
| Mat2a         | chr6:72382792-72389552    | 85.79366667 | 85.98286667 |
| Ltc4s         | chr11:50049973-50051973   | 85.7108     | 109.8776    |
| Lipc          | chr9:70645934-70782615    | 85.68786667 | 148.513     |
| Lass2         | chr3:95119173-95127490    | 85.66923333 | 80.00953333 |
| Tas2r110      | chr6:132818025-132819027  | 85.65346667 | 0.37855     |
| Utp14b        | chr1:78654399-78664176    | 85.59886667 | 23.27327333 |

|               |                           |             |             |
|---------------|---------------------------|-------------|-------------|
| Selk          | chr14:30781565-30788260   | 85.4996     | 94.30966667 |
| Txnip         | chr3:96361879-96365780    | 85.3669     | 60.25836667 |
| Sdcbp         | chr4:6292826-6323269      | 85.23503333 | 60.80263333 |
| Cyc1          | chr15:76173952-76176364   | 85.16836667 | 58.71523333 |
| Spop          | chr11:95275396-95354724   | 85.0293     | 113.553     |
| Map1lc3b      | chr8:124114367-124121947  | 85.01533333 | 97.74303333 |
| Ccpg1         | chr9:72833357-72863806    | 84.95236667 | 117.5689333 |
| Fbxo2         | chr4:147534776-147540526  | 84.9421     | 14.1554     |
| Bclaf1        | chr10:20032274-20062307   | 84.8312     | 104.6463667 |
| Ap1s2         | chrX:160347091-160367478  | 84.72056667 | 41.88066667 |
| Pcolce2       | chr9:95538046-95595970    | 84.51053333 | 81.813      |
| Eif3h         | chr15:51618108-51697007   | 84.5054     | 95.27183333 |
| Gramd1b       | chr9:40105491-40263349    | 84.4917     | 44.55196667 |
| C030046I01Rik | chr10:79372797-79379675   | 84.3626     | 130.407     |
| Sec61a1       | chr6:88453600-88468794    | 84.35176667 | 51.68816667 |
| Dync1li2      | chr8:106941573-106966947  | 84.33303333 | 41.06363333 |
| Myo1e         | chr9:70055156-70247874    | 83.9177     | 49.13636667 |
| Atp6v1g1      | chr4:63205798-63211735    | 83.90833333 | 86.34946667 |
| Cyb5r1        | chr1:136302566-136308315  | 83.84753333 | 53.859      |
| Psme1         | chr14:56197330-56200364   | 83.78576667 | 104.0462333 |
| Klf4          | chr4:55540008-55545347    | 83.68403333 | 146.6803333 |
| Sf3b1         | chr1:55042012-55084322    | 83.59813333 | 85.33693333 |
| 2810008D09Rik | chr11:116938096-116940269 | 83.542      | 7.635003333 |
| 4930455F23Rik | chr1:166205728-166217978  | 83.5107     | 45.24466667 |
| Hnrnpf        | chr6:117850357-117875640  | 83.49243333 | 79.3958     |
| Tcp1          | chr17:13109330-13117933   | 83.25813333 | 99.58326667 |
| Atp5h         | chr11:115277010-115281233 | 83.10926667 | 94.8561     |
| Bdnf          | chr2:109514856-109567200  | 83.10103333 | 20.5132     |
| Ngfrap1       | chrX:132804791-132806517  | 83.09506667 | 44.20206667 |
| Hmgn5         | chrX:106199875-106208719  | 83.03953333 | 108.7092333 |
| Ywhaq         | chr12:21396189-21423297   | 83.03566667 | 110.3020667 |
| Ndufb3        | chr1:58643442-58652792    | 82.97116667 | 79.43983333 |
| Prrc2a        | chr17:35286030-35301822   | 82.9705     | 70.7138     |
| Anxa5         | chr3:36347845-36374809    | 82.95466667 | 76.8511     |
| Snhg12        | chr4:131864592-131866939  | 82.86836667 | 71.8343     |
| Lats1         | chr10:7401006-7436259     | 82.82876667 | 75.03943333 |
| Dnaja2        | chr8:88061538-88079170    | 82.828      | 80.0796     |
| Ewsr1         | chr11:4969690-4999080     | 82.7638     | 87.97956667 |
| Nedd4         | chr9:72510153-72597655    | 82.72863333 | 120.9915667 |
| Cops5         | chr1:10014911-10027979    | 82.2763     | 84.17756667 |
| Dynll1        | chr5:115747118-115750999  | 82.24053333 | 131.9259667 |
| Oxr1          | chr15:41279027-41692593   | 82.1632     | 46.27963333 |
| Eif4ebp2      | chr10:60895244-60915417   | 82.15753333 | 86.74563333 |
| Ckap4         | chr10:83989049-83996633   | 82.14583333 | 132.5443667 |
| Taf13         | chr3:108374616-108384986  | 82.1199     | 99.08916667 |
| Golph3        | chr15:12251250-12281022   | 82.07096667 | 79.9774     |
| Atrx          | chrX:102992955-103124711  | 81.80353333 | 94.81976667 |
| Fam171a1      | chr2:3035659-3145081      | 81.5516     | 33.8355     |
| Psma2         | chr13:14705508-14717940   | 81.48643333 | 99.37506667 |
| Rpl23a        | chr11:77994436-77997086   | 81.37606667 | 142.5341667 |
| Ahsa1         | chr12:88607677-88614902   | 81.15906667 | 44.4399     |
| Fus           | chr7:135110992-135125545  | 80.9303     | 84.50416667 |

|               |                           |             |             |
|---------------|---------------------------|-------------|-------------|
| Psenen        | chr7:31346884-31348203    | 80.86506667 | 68.79426667 |
| Atp6v0b       | chr4:117556934-117559934  | 80.7943     | 75.17876667 |
| Nrd1          | chr4:108673409-108734376  | 80.55353333 | 95.85883333 |
| Hist1h2bc     | chr13:23776067-23784349   | 80.51473333 | 75.45516667 |
| Cd9           | chr6:125410283-125444773  | 80.3881     | 209.481     |
| Mbnl2         | chr14:120674890-120830920 | 80.3643     | 57.2737     |
| Nono          | chrX:98624989-98643932    | 80.26526667 | 109.7265    |
| Aes           | chr10:81022304-81029109   | 80.2455     | 52.33593333 |
| Nav2          | chr7:56214442-56865458    | 80.19693333 | 125.0883333 |
| Arhgap1       | chr2:91490274-91512477    | 80.00573333 | 60.1689     |
| Hnrpd1        | chr5:100462597-100468241  | 79.90406667 | 70.49406667 |
| Picalm        | chr7:97278741-97357957    | 79.82793333 | 64.71226667 |
| Cstf3         | chr2:104430640-104505582  | 79.79033333 | 39.6934     |
| Ndufs6        | chr13:73457323-73465930   | 79.76686667 | 68.9769     |
| Slc9a9        | chr9:94570310-95130871    | 79.66473333 | 20.5659     |
| Vdac3         | chr8:23687546-23704285    | 79.57276667 | 90.76536667 |
| Brd4          | chr17:32333218-32421068   | 79.44976667 | 78.21803333 |
| Psmc6         | chr14:14944698-14953418   | 79.42986667 | 89.59083333 |
| Camk2d        | chr3:126299890-126547972  | 79.3954     | 29.2494     |
| Cltc          | chr11:86508154-86570994   | 79.38626667 | 94.0182     |
| Eif2s3y       | chrY:347054-365037        | 79.244821   | 61.8147393  |
| Zcrb1         | chr15:93216543-93228721   | 79.00846667 | 76.3936     |
| Rcbtb1        | chr14:59820064-59856102   | 78.95066667 | 48.27606667 |
| Ubap2l        | chr3:89803510-89856437    | 78.81906667 | 100.3043667 |
| Mdh1          | chr11:21456694-21471937   | 78.7837     | 86.03573333 |
| Cdk2ap1       | chr5:124795447-124804637  | 78.7382     | 84.7993     |
| Uqcrc2        | chr7:127778702-127803037  | 78.5908     | 45.09573333 |
| Xpa           | chr4:46188093-46209183    | 78.4573     | 54.18396667 |
| Wbp2          | chr11:115939886-115948278 | 78.435      | 46.77403333 |
| Anapc16       | chr10:59450656-59465860   | 78.41133333 | 40.0862     |
| Sfr1          | chr19:47806245-47810078   | 78.4077     | 78.44663333 |
| Snora81       | chr16:23110842-23111006   | 78.22183333 | 109.8517333 |
| Lsm14a        | chr7:35129738-35174559    | 77.97746667 | 73.86196667 |
| Tmem223       | chr19:8845485-8846965     | 77.6906     | 85.56906667 |
| Sltm          | chr9:70390584-70440039    | 77.6826     | 53.66876667 |
| 2500003M10Rik | chr3:90302879-90313365    | 77.60296667 | 68.2022     |
| Shroom3       | chr5:93112460-93394785    | 77.5733     | 41.45113333 |
| Senp6         | chr9:79914709-79992587    | 77.32986667 | 66.2279     |
| Cox5b         | chr1:36748331-36750233    | 77.3016     | 63.51683333 |
| Gabarapl2     | chr8:114464602-114476815  | 77.22486667 | 36.01546667 |
| Cript         | chr17:87424900-87435148   | 77.14883333 | 85.04873333 |
| Gas5          | chr1:162965296-162968668  | 77.13536667 | 114.0347333 |
| Ptpn6         | chr6:124670735-124688727  | 77.05403333 | 17.8288     |
| Bmx           | chrX:160630773-160696125  | 77.02286667 | 21.93306667 |
| Mir1940       | chr13:96100534-96100638   | 77.014      | 0           |
| Fam71a        | chr1:192986462-192988696  | 76.9934     | 15.4141     |
| Srp19         | chr18:34490798-34496253   | 76.95526667 | 37.7102     |
| Daam1         | chr12:72932064-73093354   | 76.93363333 | 65.039      |
| Mrp63         | chr14:58445075-58447582   | 76.88836667 | 18.79623333 |
| Tmc4          | chr7:3617355-3629155      | 76.85523333 | 109.7483333 |
| Ybx1          | chr4:118949931-118967118  | 76.85143333 | 84.56313333 |
| Dynlt1b       | chr17:6429259-6435443     | 76.82316667 | 107.2861667 |



|               |                              |             |             |
|---------------|------------------------------|-------------|-------------|
| Gm684         | chr9:51078362-51086659       | 76.77943333 | 56.4509     |
| Mlf2          | chr6:124881405-124886167     | 76.7429     | 56.94243333 |
| Zfp664        | chr5:125343074-125369000     | 76.70533333 | 90.94626667 |
| Atp5o         | chr16:91925467-91931875      | 76.64626667 | 85.3474     |
| Ctso          | chr3:81736537-81760647       | 76.62846667 | 39.90463333 |
| Hnrnmpm       | chr17:33783177-33822403      | 76.56216667 | 48.6349     |
| Sh3bgrl3      | chr4:133683320-133684668     | 76.54156667 | 91.46636667 |
| Pcbp2         | chr15:102301062-102330490    | 76.53486667 | 83.11103333 |
| Appl2         | chr10:83062778-83111409      | 76.43906667 | 66.01713333 |
| Hnrnpul2      | chr19:8893890-8908632        | 76.39786667 | 78.24746667 |
| Gm14005       | chr2:128124398-128255087     | 76.37183333 | 0.251544333 |
| Etfb          | chr7:50699512-50713152       | 76.2615     | 86.26776667 |
| Tacc2         | chr7:137720997-137908298     | 76.26003333 | 39.7379     |
| Tmem131       | chr1:36849033-36996372       | 76.2497     | 59.4164     |
| Nckap1        | chr2:80341451-80421122       | 76.24443333 | 58.6963     |
| Ssx2ip        | chr3:146067605-146103101     | 76.23026667 | 55.2348     |
| Ccdc47        | chr11:106060669-106077681    | 76.2038     | 71.5201     |
| Cyb5r3        | chr15:82983931-83002638      | 76.17236667 | 117.5505333 |
| Rpl6          | chr5:121654509-121659250     | 76.11503333 | 126.2995667 |
| Dapl1         | chr2:59322709-59343078       | 76.0339     | 92.8076     |
| Pfdn2         | chr1:173275829-173288301     | 76.01706667 | 45.22353333 |
| ldh3b         | chr2:130105044-130110187     | 75.99893333 | 74.77806667 |
| Arid1a        | chr4:133234922-133309526     | 75.88483333 | 74.0132     |
| Sdha          | chr13:74459702-74487688      | 75.84106667 | 53.63633333 |
| Gm10664       | chr8:67552315-67561235       | 75.57863333 | 83.13743333 |
| Chmp5         | chr4:40895585-40912335       | 75.57436667 | 43.02006667 |
| Shoc2         | chr19:54018795-54107768      | 75.56776667 | 81.43416667 |
| ltgb1         | chr8:131209553-131257479     | 75.50236667 | 96.16786667 |
| Lclat1        | chr17:73457324-73592706      | 75.47863333 | 23.5955     |
| Dusp10        | chr1:185858339-185899515     | 75.42943333 | 88.2911     |
| Clk4          | chr11:51076672-51095266      | 75.3836     | 90.07893333 |
| Ldha          | chr7:54101173-54110997       | 75.21963333 | 120.6138333 |
| Pnpla6        | chr8:3515383-3544267         | 75.21583333 | 28.09543333 |
| Snrpg         | chr6:86321533-86328896       | 75.02523333 | 83.1593     |
| Ythdc1        | chr5:87233514-87265682       | 75.00336667 | 51.08443333 |
| Lrch4         | chr5:138070350-138082327     | 74.9338     | 102.6365    |
| Rb1           | chr14:73595308-73725598      | 74.8578     | 44.13763333 |
| Anp32a        | chr9:62189149-62226609       | 74.66596667 | 72.56746667 |
| Lmo7          | chr14:102129144-102333910    | 74.4764     | 50.7835     |
| 1300002E11Rik | chr16:21794419-21809112      | 74.34303333 | 41.96216667 |
| Tmem159       | chr7:127245939-127264500     | 74.1516     | 43.9589     |
| Shfm1         | chr6:6508274-6528658         | 74.11196667 | 84.9124     |
| Bex4          | chrX:132673583-132674976     | 74.10796667 | 10.88142433 |
| Epb4.111      | chr2:156246787-156368950     | 74.0778     | 58.8712     |
| Cdh2          | chr18:16747385-16967558      | 74.06113333 | 8.566903333 |
|               | 1-Sep chr1:95375569-95406309 | 73.97226667 | 67.9835     |
| Canx          | chr11:50107458-50139175      | 73.90973333 | 135.935     |
| Tmem126a      | chr7:97599221-97605718       | 73.90726667 | 35.851      |
| Paip2         | chr18:35758320-35776839      | 73.9022     | 53.85596667 |
| Pkm2          | chr9:59504174-59527182       | 73.8836     | 111.7620667 |
| Dhx15         | chr5:52541447-52581758       | 73.71283333 | 83.81013333 |
| BC056474      | chr8:87604861-87606238       | 73.643      | 70.39906667 |

|               |                           |             |             |
|---------------|---------------------------|-------------|-------------|
| Trib1         | chr15:59480208-59488654   | 73.6428     | 43.39973333 |
| Bnip2         | chr9:69837307-69856124    | 73.63683333 | 61.21066667 |
| Cdh13         | chr8:120807654-121847348  | 73.57903333 | 164.1273333 |
| Prr13         | chr15:102289600-102293237 | 73.55373333 | 67.77643333 |
| Kdm4a         | chr4:117809608-117852648  | 73.52523333 | 17.43276667 |
| Hspa1b        | chr17:35093373-35096183   | 73.47803333 | 53.33436667 |
| Cux1          | chr5:136724004-137043301  | 73.4441     | 65.06663333 |
| Btf3          | chr13:99079851-99086961   | 73.38773333 | 70.27843333 |
| Atp2c1        | chr9:105313691-105423587  | 73.3486     | 62.71843333 |
| Ccdc129       | chr6:55787011-55928592    | 73.3127     | 41.97563333 |
| Arfgef1       | chr1:10127587-10222751    | 73.14696667 | 61.6244     |
| Ube2b         | chr11:51798647-51813968   | 73.10183333 | 75.68823333 |
| Defb4         | chr8:19198703-19201547    | 73.06046667 | 65.06956667 |
| 9530068E07Rik | chr11:52209929-52222225   | 72.91723333 | 62.50646667 |
| Swi5          | chr2:32134335-32143588    | 72.90973333 | 88.8885     |
| Krt6b         | chr15:101506453-101510720 | 72.90746667 | 112.1146333 |
| Dnajc1        | chr2:18127959-18314457    | 72.85903333 | 43.06383333 |
| Pcdh1         | chr18:38356347-38369416   | 72.84296667 | 52.46146667 |
| Nfatc1        | chr18:80802943-80909810   | 72.80786667 | 26.87333333 |
| Enah          | chr1:183834575-183950111  | 72.7731     | 23.69166667 |
| Clic6         | chr16:92498391-92541486   | 72.75876667 | 2.87804     |
| Pate2         | chr9:35477223-35480474    | 72.73263333 | 8.69049     |
| Cd151         | chr7:148653260-148657380  | 72.23026667 | 76.6326     |
| Nefl          | chr14:68701940-68705794   | 72.18283333 | 1.105376267 |
| Churc1        | chr12:77866559-77884165   | 72.13373333 | 40.24426667 |
| Mtap4         | chr9:109834277-109986458  | 72.11476667 | 57.34203333 |
| Rbbp6         | chr7:130114077-130146086  | 71.82836667 | 82.4278     |
| Eef1g         | chr19:9041530-9052670     | 71.77923333 | 138.6583333 |
| Hnrnpk        | chr13:58493311-58503877   | 71.7663     | 85.1801     |
| Slc6a6        | chr6:91634060-91709057    | 71.72883333 | 94.86666667 |
| Rps19bp1      | chr15:80091043-80094736   | 71.72683333 | 21.54617    |
| Ndufa2        | chr18:36902019-36904202   | 71.68946667 | 71.102      |
| Nek7          | chr1:140381290-140516273  | 71.59973333 | 57.33863333 |
| Ppp1r12a      | chr10:107599455-107714631 | 71.56166667 | 68.34493333 |
| Sun2          | chr15:79554497-79572966   | 71.4672     | 58.8777     |
| Gtf2f1        | chr17:57142824-57150711   | 71.46266667 | 63.11153333 |
| Zfx3          | chr8:111238543-111485536  | 71.4407     | 109.7166667 |
| Cct5          | chr15:31520638-31531559   | 71.40093333 | 106.8168333 |
| Ufc1          | chr1:173218694-173225113  | 71.39556667 | 58.51716667 |
| Adipor1       | chr1:136312043-136328918  | 71.36446667 | 43.56373333 |
| Acot13        | chr13:24909823-24923358   | 71.3171     | 59.68453333 |
| Rell1         | chr5:64300136-64360136    | 71.29693333 | 66.23946667 |
| Sdc4          | chr2:164249746-164268688  | 71.2424     | 77.7357     |
| Ep300         | chr15:81416643-81482507   | 71.17966667 | 52.0737     |
| Irgq          | chr7:25315666-25323619    | 71.1656     | 62.03493333 |
| Fnbp1l        | chr3:122241636-122322585  | 71.12783333 | 75.2279     |
| Etnk1         | chr6:143115749-143157066  | 71.092      | 36.2704     |
| Rbm28         | chr6:29073572-29114724    | 71.07696667 | 40.49836667 |
| Huwe1         | chrX:148237824-148369961  | 71.06946667 | 68.4515     |
| Jup           | chr11:100230169-100259104 | 70.9869     | 113.9054667 |
| St6gal2       | chr17:55585014-55638524   | 70.84826667 | 26.92866667 |
| Ubxn4         | chr1:130140757-130175954  | 70.80003333 | 49.09033333 |

|               |                           |             |             |
|---------------|---------------------------|-------------|-------------|
| lft20         | chr11:78349937-78354975   | 70.6458     | 126.0367667 |
| Wasf2         | chr4:132686547-132754245  | 70.51593333 | 63.07946667 |
| Rangap1       | chr15:81534677-81560349   | 70.43546667 | 98.09813333 |
| Fnbp1         | chr2:30881725-30997528    | 70.36143333 | 69.0045     |
| Uchl1         | chr5:67067359-67078473    | 70.31693333 | 23.22490667 |
| Hp1bp3        | chr4:137772541-137799085  | 70.28893333 | 82.12993333 |
| Gca           | chr2:62502383-62532166    | 70.2485     | 79.9561     |
| Obfc2b        | chr10:127838450-127846852 | 70.2101     | 20.8704     |
| Psemb6        | chr11:70338858-70341360   | 70.08883333 | 69.67476667 |
| Ccnt1         | chr15:98373641-98398067   | 70.01443333 | 29.68626667 |
| Pnpla3        | chr15:83998245-84019951   | 69.91376667 | 19.00016667 |
| Pik3r5        | chr11:68245626-68311348   | 69.85183333 | 3.97229     |
| Ak2           | chr4:128670508-128688773  | 69.7859     | 65.89686667 |
| Ppapdc2       | chr19:29038409-29041291   | 69.70993333 | 50.18773333 |
| Kcnq3         | chr15:65826476-66117786   | 69.67736667 | 168.8973333 |
| Snx1          | chr9:65935933-65972693    | 69.65063333 | 19.04893333 |
| Timm17a       | chr1:137198111-137210314  | 69.63733333 | 99.04303333 |
| lqgap1        | chr7:87856468-87948217    | 69.60733333 | 63.38813333 |
| Tas2r130      | chr6:131579909-131580848  | 69.5136     | 0.138471    |
| Tas2r135      | chr6:42355527-42356493    | 69.49473333 | 13.09451333 |
| Gtf2i         | chr5:134713703-134790616  | 69.4922     | 70.99573333 |
| Fryl          | chr5:73411429-73647857    | 69.3877     | 110.3776667 |
| Atp6v1e1      | chr6:120745261-120772703  | 69.3266     | 65.25706667 |
| Chd4          | chr6:125046180-125080519  | 69.321      | 65.8906     |
| Ccdc72        | chr9:108980501-108984895  | 69.30283333 | 50.11866667 |
| lfi30         | chr8:73286671-73290562    | 69.267      | 92.6845     |
| Ghitm         | chr14:37933631-37948508   | 69.21876667 | 50.78286667 |
| Efcab5        | chr11:76903416-77002470   | 69.04663333 | 10.18296    |
| Pdhb          | chr14:8998504-9005506     | 68.97753333 | 81.99836667 |
| Calhm2        | chr19:47206721-47212784   | 68.94923333 | 62.17203333 |
| Polr2j        | chr5:136592560-136598817  | 68.89083333 | 42.49553333 |
| Stard5        | chr7:90780526-90790838    | 68.7754     | 41.71783333 |
| Serp1         | chr3:58325892-58329806    | 68.73046667 | 61.54726667 |
| 1500012F01Rik | chr2:166888433-166891362  | 68.62673333 | 75.97073333 |
| Ppp2ca        | chr11:51912325-51936251   | 68.58943333 | 91.8801     |
| 2310036O22Rik | chr8:87550731-87554185    | 68.582      | 54.91403333 |
| Gsk3b         | chr16:38089086-38246165   | 68.54853333 | 84.56486667 |
| Paics         | chr5:77380435-77396531    | 68.5341     | 70.86193333 |
| Atxn7l1       | chr12:33987379-34053142   | 68.5027     | 25.6669     |
| Ezr           | chr17:6942479-6987129     | 68.38753333 | 184.276     |
| BC002163      | chr16:42955692-42956192   | 68.3759     | 33.9343     |
| Eif4b         | chr15:101904203-101927604 | 68.37583333 | 80.32503333 |
| Setd8         | chr5:124889938-124912316  | 68.10726667 | 78.26706667 |
| Polr2m        | chr9:71326243-71333790    | 68.07246667 | 61.88796667 |
| Hdgf          | chr3:87710242-87720054    | 68.05463333 | 56.67003333 |
| P4hb          | chr11:120421617-120434250 | 67.94743333 | 111.2941333 |
| Rrbp1         | chr2:143773130-143836999  | 67.9394     | 81.7996     |
| Ube2l3        | chr16:17152107-17201585   | 67.893      | 54.1187     |
| Use1          | chr8:73890746-73893631    | 67.87433333 | 39.6557     |
| Zmynd11       | chr13:9684081-9764560     | 67.81516667 | 37.98313333 |
| Wnk1          | chr6:119873986-119988673  | 67.805      | 99.4836     |
| Ndufa1        | chrX:34727583-34731233    | 67.7266     | 70.33483333 |

|               |                           |             |             |
|---------------|---------------------------|-------------|-------------|
| Psemb1        | chr17:15612684-15635240   | 67.6478     | 35.08626667 |
| Vps29         | chr5:122804421-122813296  | 67.62403333 | 94.61653333 |
| Dynlt1c       | chr17:6806495-6812609     | 67.53023333 | 81.14956667 |
| Nup88         | chr11:70756572-70783475   | 67.5278     | 49.62913333 |
| Cwc15         | chr9:14305062-14315064    | 67.43446667 | 53.95703333 |
| Gltp          | chr5:115119510-115140944  | 67.3944     | 125.9080333 |
| Srek1         | chr13:104531694-104554662 | 67.3536     | 68.66643333 |
| Hjurp         | chr1:90155430-90174154    | 67.24393333 | 19.1877     |
| 1110004F10Rik | chr7:123236893-123248724  | 67.228      | 47.3909     |
| Prpsap1       | chr11:116332129-116351660 | 67.2275     | 32.6018     |
| Gpx2          | chr12:77893321-77896541   | 67.22066667 | 75.95226667 |
| Nsmce1        | chr7:132611153-132635056  | 67.21613333 | 27.8092     |
| Dsg2          | chr18:20716616-20763027   | 67.20006667 | 77.12163333 |
| Msl1          | chr11:98657082-98669173   | 67.1972     | 58.4279     |
| Sap25         | chr5:138082700-138084130  | 67.15936667 | 78.82916667 |
| Litaf         | chr16:10959365-10993214   | 67.04136667 | 56.9938     |
| Dnajc21       | chr15:10376517-10400271   | 67.03993333 | 31.82416667 |
| Mtap6         | chr7:106415956-106485647  | 67.02726667 | 43.57596667 |
| Snhg5         | chr9:88415890-88417735    | 67.00826667 | 48.82593333 |
| Golgb1        | chr16:36885096-36933171   | 66.93746667 | 46.31066667 |
| Ppib          | chr9:65907975-65914436    | 66.92563333 | 95.53716667 |
| Slk           | chr19:47654508-47719736   | 66.8073     | 92.26343333 |
| Ndufs7        | chr10:79712196-79719537   | 66.68526667 | 46.42256667 |
| Vav1          | chr17:57418522-57468659   | 66.6659     | 16.02023333 |
| Crebbp        | chr16:4084047-4213404     | 66.66516667 | 73.46323333 |
| Brwd1         | chr16:96213698-96304035   | 66.6559     | 42.5422     |
| Leprel1       | chr16:25960408-26105870   | 66.63836667 | 13.90254667 |
| Cirbp         | chr10:79630585-79634398   | 66.61216667 | 54.28506667 |
| Ppm1g         | chr5:31505040-31522918    | 66.5733     | 47.286      |
| Fgf1          | chr18:38998326-39078353   | 66.50916667 | 53.22993333 |
| Spnb3         | chr19:4711222-4752352     | 66.4633     | 36.96353333 |
| Med27         | chr2:29202355-29380308    | 66.3884     | 45.60713333 |
| Ergic3        | chr2:155833860-155844015  | 66.384      | 119.4306333 |
| Nars          | chr18:64659300-64676211   | 66.38376667 | 40.59303333 |
| Uqcr11        | chr10:79865741-79869566   | 66.3636     | 83.5152     |
| Srsf11        | chr3:157673456-157699603  | 66.30013333 | 68.82903333 |
| Fnta          | chr8:27109193-27126073    | 66.28386667 | 43.84426667 |
| Ppp1cb        | chr5:32761342-32796085    | 66.2021     | 64.81703333 |
| Pls3          | chrX:73030992-73120509    | 66.1869     | 53.35083333 |
| Arl8a         | chr1:137043410-137052845  | 66.11633333 | 63.332      |
| Atp6v0c-ps2   | chr17:24300831-24306340   | 66.02786667 | 54.4965     |
| Gdi2          | chr13:3537320-3565507     | 65.96993333 | 83.4154     |
| Atp5g1        | chr11:95934106-95937008   | 65.96756667 | 65.52153333 |
| Zmynd8        | chr2:165609651-165710251  | 65.96636667 | 41.50953333 |
| Rnf7          | chr9:96371375-96379014    | 65.93933333 | 68.41603333 |
| Tmem30b       | chr12:74644100-74647382   | 65.93443333 | 59.18293333 |
| Btbd11        | chr10:84849558-85123037   | 65.90013333 | 74.0106     |
| St18          | chr1:6477311-6851021      | 65.73993333 | 116.5393333 |
| Fbrs          | chr7:134628734-134635027  | 65.6565     | 44.33336667 |
| Ndufa10       | chr1:94336295-94370335    | 65.59126667 | 90.712      |
| Atf5          | chr7:52067625-52072028    | 65.57653333 | 10.63082333 |
| Gas7          | chr11:67346499-67502494   | 65.49563333 | 30.15       |

|               |                           |             |             |
|---------------|---------------------------|-------------|-------------|
| Rnf14         | chr18:38456288-38477503   | 65.4949     | 39.4512     |
| Hbp1          | chr12:32611319-32635400   | 65.48813333 | 71.85323333 |
| Dynlt1a       | chr17:6310544-6317474     | 65.35906667 | 104.5909667 |
| Dbnl          | chr11:5688485-5700983     | 65.28573333 | 41.92033333 |
| Krt16         | chr11:100107405-100110216 | 65.24813333 | 149.7789667 |
| Ttc1          | chr11:43543507-43561475   | 65.1609     | 39.39293333 |
| Eprs          | chr1:187186973-187252234  | 65.15336667 | 35.71083333 |
| Smtn          | chr11:3417524-3439295     | 65.1071     | 45.48043333 |
| Selm          | chr11:3414704-3417354     | 65.08736667 | 82.19123333 |
| Fah           | chr7:91733669-91754452    | 65.03253333 | 11.14919667 |
| Acbd5         | chr2:22923720-22970032    | 64.931      | 39.00696667 |
| Rpl22l1       | chr3:28704432-28706337    | 64.85416667 | 103.2001333 |
| Ifi27l2a      | chr12:104680376-104681890 | 64.84413333 | 40.12235667 |
| Akap9         | chr5:3928185-4080204      | 64.8015     | 66.33886667 |
| Pgam1         | chr19:41986360-41993155   | 64.77866667 | 83.56296667 |
| Dynlt1c       | chr17:6648841-6654956     | 64.76516667 | 80.756      |
| Prpf4b        | chr13:34967362-34994747   | 64.69443333 | 76.58663333 |
| Dmkn          | chr7:31548774-31566085    | 64.6857     | 134.2366    |
| Ssr3          | chr3:65183578-65196475    | 64.6785     | 117.972     |
| Ndufb10       | chr17:24859011-24861333   | 64.67163333 | 48.38426667 |
| Zfp106        | chr2:120332565-120389567  | 64.62393333 | 36.7943     |
| Gatc          | chr5:115783250-115791170  | 64.62133333 | 43.61513333 |
| Arf4          | chr14:27457682-27476744   | 64.591      | 138.9943333 |
| Ppp3ca        | chr3:136333733-136598743  | 64.5745     | 52.46966667 |
| Anp32e        | chr3:95733179-95751310    | 64.5626     | 68.16516667 |
| Cope          | chr8:72826683-72836889    | 64.53026667 | 52.24026667 |
| Rbm3          | chrX:7716100-7722928      | 64.44816667 | 111.2651333 |
| Rad21         | chr15:51794149-51823306   | 64.37326667 | 54.4115     |
| Nxf1          | chr19:8831592-8845400     | 64.3705     | 82.88413333 |
| Rab14         | chr2:35035724-35056640    | 64.29446667 | 86.2149     |
| Morf4l2       | chrX:133267489-133278225  | 64.2476     | 71.9637     |
| Sf3b2         | chr19:5273920-5295455     | 64.2308     | 44.66253333 |
| Raly1         | chr3:13471654-14182287    | 64.1926     | 8.816763333 |
| Hnrnpul1      | chr7:26507057-26539739    | 64.1616     | 72.35896667 |
| Pea15a        | chr1:174126859-174136912  | 64.15286667 | 26.16036667 |
| Araf          | chrX:20425668-20437647    | 64.1345     | 59.2055     |
| Glud1         | chr14:35123912-35158219   | 64.11256667 | 75.20296667 |
| Top1          | chr2:160471632-160548499  | 64.07546667 | 53.7693     |
| Ndufb11       | chrX:20192451-20194690    | 64.06663333 | 59.61836667 |
| Zcchc6        | chr13:59873239-59924508   | 64.04856667 | 48.6539     |
| Mbd6          | chr10:126719011-126725827 | 64.02726667 | 27.69366667 |
| Zfp652        | chr11:95610380-95626027   | 64.02546667 | 40.38056667 |
| Dynlt3        | chrX:9231395-9240109      | 63.9942     | 98.13503333 |
| 1810012P15Rik | chr11:78640096-78657401   | 63.95696667 | 21.76413333 |
| Nsd1          | chr13:55311142-55419686   | 63.91313333 | 62.65326667 |
| Psmb5         | chr14:55232956-55236832   | 63.89333333 | 68.37176667 |
| Bax           | chr7:52717064-52722268    | 63.8805     | 18.93219    |
| Eif4g3        | chr4:137549370-137762994  | 63.84896667 | 57.5614     |
| Ap1ar         | chr3:127510182-127540410  | 63.8382     | 78.67813333 |
| Tmem85        | chr2:112203175-112208184  | 63.80153333 | 79.57403333 |
| Pnrc2         | chr4:135426840-135429761  | 63.75366667 | 71.81133333 |
| Luc7l2        | chr6:38501443-38559470    | 63.71203333 | 54.0087     |

|               |                                 |             |             |
|---------------|---------------------------------|-------------|-------------|
| Gm13253       | chr4:131775807-131776504        | 63.658      | 112.9238    |
| Zfp414        | chr17:33766036-33768659         | 63.6511     | 34.49773333 |
| Max           | chr12:78038255-78063235         | 63.54823333 | 55.13126667 |
| Psap          | chr10:59740375-59765348         | 63.4003     | 116.4462333 |
| Acsl4         | chrX:138752535-138825078        | 63.3574     | 30.6611     |
| Ufd1l         | chr16:18812386-18835354         | 63.34263333 | 22.82936667 |
| Usp15         | chr10:122550299-122633979       | 63.2986     | 36.49957667 |
| Dmrt2         | chr19:25746900-25753481         | 63.2413     | 58.92236667 |
| Phf20l1       | chr15:66409133-66476817         | 63.13476667 | 231.1636667 |
| Cdk4          | chr10:126500658-126504338       | 63.06056667 | 73.5542     |
| Al314976      | chr17:48549404-48556591         | 63.0485     | 29.84776667 |
| Kcnq1         | chr7:150293158-150612947        | 63.04626667 | 69.0787     |
| Rplp0         | chr5:116009475-116013738        | 63.0378     | 145.243     |
| Fkbp4         | chr6:128380124-128388649        | 63.0357     | 61.11843333 |
| Mllt4         | chr17:13897547-14042801         | 63.0333     | 49.32016667 |
| Tmem50a       | chr4:134453763-134470831        | 63.02656667 | 69.30053333 |
| Fcf1          | chr12:86311879-86324253         | 62.98146667 | 59.1494     |
| Trappc6b      | chr12:60144078-60162448         | 62.967      | 51.89423333 |
| Serpinc9e     | chr13:33341478-33352715         | 62.95003333 | 19.81334    |
| Terf2         | chr8:109593301-109620445        | 62.9313     | 19.70218    |
| Hsf1          | chr15:76307874-76331402         | 62.90403333 | 23.56366667 |
| Irf2bp2       | chr8:129112195-129117336        | 62.81646667 | 43.29876667 |
| Dctn2         | chr10:126703317-126719015       | 62.80596667 | 39.77446667 |
| Eps15         | chr4:108952879-109060421        | 62.79496667 | 18.14953333 |
| Rgs9          | chr11:109086668-109159495       | 62.6658     | 18.714      |
| Zcchc7        | chr4:44769430-44945086          | 62.49516667 | 65.92473333 |
| Ddit3         | chr10:126727848-126733344       | 62.44593333 | 46.63753333 |
| Cd44          | chr2:102651299-102741822        | 62.4326     | 655.3423333 |
| Rps19         | chr7:25669732-25674821          | 62.41933333 | 97.30496667 |
| Sat1          | chrX:151647681-151650952        | 62.34926667 | 59.99113333 |
| Rabggtb       | chr3:153570252-153575930        | 62.30693333 | 96.1727     |
| Kcnh7         | chr2:62541002-63022344          | 62.29033333 | 81.37956667 |
| Spin1         | chr13:51196266-51247915         | 62.28896667 | 61.425      |
| Chd6          | chr2:160772713-160934792        | 62.26466667 | 82.213      |
| Ncor1         | chr11:62129927-62270834         | 62.23256667 | 74.40496667 |
| Slc25a25      | chr2:32270006-32306990          | 62.22583333 | 64.5256     |
|               | 14-Sep chr3:144233390-144260640 | 62.2085     | 52.66053333 |
| BC005537      | chr13:24893525-24904768         | 62.20716667 | 64.677      |
| Fert2         | chr17:64245366-64488845         | 62.19416667 | 25.59403333 |
| Arglu1        | chr8:8666575-8690537            | 62.17633333 | 81.75323333 |
| Maged1        | chrX:91780812-91787413          | 62.1444     | 114.4538667 |
| Cd2ap         | chr17:42929899-43013373         | 62.13713333 | 51.6512     |
| Ccar1         | chr10:62206675-62255116         | 62.11843333 | 63.36143333 |
| Snx3          | chr10:42221859-42255175         | 62.06033333 | 45.96523333 |
| Egr2          | chr10:67000616-67004936         | 62.00183333 | 21.29413333 |
| Ssrp1         | chr2:84877357-84887268          | 61.9851     | 47.1598     |
| Dync1i2       | chr2:71049762-71101359          | 61.96026667 | 51.82936667 |
| Mapk13        | chr17:28906261-28915649         | 61.9116     | 43.51066667 |
| Psm1          | chr7:121408063-121419630        | 61.89763333 | 67.6782     |
| A630007B06Rik | chr19:56865452-56888173         | 61.89306667 | 44.98093333 |
| Glb1l2        | chr9:26570628-26614002          | 61.8789     | 29.94136667 |
| Atf6          | chr1:172634587-172797902        | 61.79306667 | 36.9129     |

|               |                           |             |             |
|---------------|---------------------------|-------------|-------------|
| St13          | chr15:81195473-81230124   | 61.59883333 | 53.40596667 |
| Rnf5          | chr17:34738043-34740506   | 61.5808     | 64.64946667 |
| Pigt          | chr2:164323024-164333801  | 61.43846667 | 78.95156667 |
| Pigb          | chr9:72863502-72887506    | 61.4353     | 72.08013333 |
| Gtf3c6        | chr10:39969008-39977471   | 61.40696667 | 59.79122667 |
| Pygl          | chr12:71291801-71328670   | 61.25743333 | 31.4708     |
| Ankhd1        | chr18:36720256-36818562   | 61.1984     | 53.903      |
| Dsc2          | chr18:20189298-20218006   | 61.1836     | 111.4126667 |
| Slmap         | chr14:27232660-27353226   | 61.17636667 | 64.87256667 |
| Ccnl1         | chr3:65750072-65762147    | 61.0494     | 74.55706667 |
| Pcbp1         | chr6:86474490-86476159    | 61.04896667 | 63.77023333 |
| Gzma          | chr13:113884034-113891189 | 60.97933333 | 13.84306933 |
| Fam103a1      | chr7:88907838-88914376    | 60.95523333 | 72.0038     |
| Psmc7         | chr8:110104279-110112382  | 60.9497     | 55.88343333 |
| Napepld       | chr5:21168720-21207163    | 60.92866667 | 21.18896667 |
| Mdm2          | chr10:117125960-117147772 | 60.86053333 | 59.0963     |
| Hspe1         | chr1:55144991-55148161    | 60.8056     | 62.95966667 |
| 2900064A13Rik | chr2:112295181-112307593  | 60.75603333 | 85.50643333 |
| Psme3         | chr11:101177564-101184844 | 60.70186667 | 51.26156667 |
| Shisa5        | chr9:108941140-108960280  | 60.69036667 | 77.9963     |
| Myl12a        | chr17:71343132-71351873   | 60.65603333 | 38.66353333 |
| Hnrnpa0       | chr13:58227239-58229917   | 60.62576667 | 72.00963333 |
| Zbtb38        | chr9:96585841-96632094    | 60.60323333 | 24.98353333 |
| Hdlbp         | chr1:95302516-95375385    | 60.5894     | 58.48933333 |
| Banf1         | chr19:5364639-5366645     | 60.57606667 | 81.21966667 |
| Por           | chr5:136165083-136211195  | 60.51526667 | 31.1733     |
| Tmem179b      | chr19:8847011-8848957     | 60.4916     | 35.8498     |
| Ss18          | chr18:14784137-14841423   | 60.4522     | 29.75403333 |
| Ociad1        | chr5:73684032-73705316    | 60.4454     | 62.3946     |
| Ube2j1        | chr4:33118399-33139339    | 60.42303333 | 21.654      |
| Tceb2         | chr17:23961706-23966076   | 60.34383333 | 124.9659    |
| Tmed2         | chr5:124990799-125000512  | 60.30176667 | 71.15086667 |
| Syng2         | chr11:117670980-117675600 | 60.29656667 | 72.95316667 |
| Erp29         | chr5:121894761-121902483  | 60.29636667 | 70.15063333 |
| Snx12         | chrX:98293124-98417902    | 60.2418     | 97.81416667 |
| Wac           | chr18:7868855-7929025     | 60.1535     | 47.66323333 |
| Clic1         | chr17:35187187-35195664   | 60.08743333 | 58.38876667 |
| Unc5b         | chr10:60225342-60294329   | 60.0865     | 33.8574     |
| Cldn3         | chr5:135462083-135463346  | 60.0313     | 55.09743333 |
| Serpina1e     | chr12:105185141-105195107 | 60.02586667 | 13.46042667 |
| Mapk10        | chr5:103336966-103640353  | 60.0037     | 6.735336667 |
| Atad1         | chr19:32747052-32786788   | 59.98563333 | 73.3788     |
| Snx2          | chr18:53336018-53380514   | 59.94773333 | 53.00233333 |
| Tnfrsf8       | chr4:144858878-144905050  | 59.92713333 | 60.2924     |
| Ggnbp2        | chr11:84645862-84684240   | 59.91906667 | 61.29436667 |
| Hmgn3         | chr9:83003548-83040214    | 59.9125     | 65.84583333 |
| Pdlim3        | chr8:46970838-47004900    | 59.88093333 | 18.01253333 |
| Ssb           | chr2:69699618-69709903    | 59.85416667 | 51.403      |
| Bag3          | chr7:135667096-135690493  | 59.839      | 57.7757     |
| Sec31a        | chr5:100790667-100845253  | 59.77736667 | 84.5217     |
| Eif3f         | chr7:116077928-116085456  | 59.7094     | 75.40516667 |
| Tubb2a        | chr13:34166146-34169877   | 59.68926667 | 69.41963333 |

|               |                           |             |             |
|---------------|---------------------------|-------------|-------------|
| Hprt          | chrX:50341254-50374837    | 59.68823333 | 63.07103333 |
| 2410004N09Rik | chr18:33954545-33955643   | 59.6797     | 37.29696667 |
| Cd274         | chr19:29441927-29462584   | 59.6552     | 15.34993333 |
| Ubxn1         | chr19:8946048-8950146     | 59.58743333 | 30.22106667 |
| Nrbp1         | chr5:31543290-31553935    | 59.5606     | 39.79593333 |
| Tfg           | chr16:56690441-56717563   | 59.53806667 | 61.23676667 |
| Armc10        | chr5:21151801-21168410    | 59.5284     | 34.94213333 |
| Naca          | chr10:127472401-127485693 | 59.52603333 | 75.66973333 |
| Tssc4         | chr7:150255272-150256992  | 59.44553333 | 28.44643333 |
| Bud31         | chr5:145901265-145908943  | 59.4355     | 56.9404     |
| Fabp5         | chr3:10012605-10016610    | 59.36183333 | 149.7307667 |
| Tardbp        | chr4:147986490-148001105  | 59.3473     | 42.48343333 |
| Cct7          | chr6:85401498-85418471    | 59.3306     | 60.5311     |
| Morn4         | chr19:42149428-42160860   | 59.31073333 | 68.85706667 |
| Smg7          | chr1:154684124-154749776  | 59.29806667 | 60.25223333 |
| Ccni          | chr5:93610958-93635521    | 59.29123333 | 78.91936667 |
| Ciz1          | chr2:32218529-32233833    | 59.28133333 | 42.18466667 |
| Fam117a       | chr11:95198331-95243186   | 59.21836667 | 30.77916667 |
| Nop56         | chr2:130100147-130105049  | 59.21483333 | 70.27003333 |
| Dnajc7        | chr11:100444149-100481482 | 59.04133333 | 54.3244     |
| Mtss1         | chr15:58772788-58913581   | 59.0348     | 47.11686667 |
| Gm12238       | chr11:55296207-55296331   | 59.02866667 | 0           |
| 0610031J06Rik | chr3:88128944-88132553    | 59.0014     | 61.72883333 |
| Emb           | chr13:118009379-118063222 | 58.98196667 | 72.6498     |
| Nfat5         | chr8:109817369-109903417  | 58.87343333 | 45.94123333 |
| Cdc123        | chr2:5715339-5766006      | 58.83173333 | 60.51253333 |
| Adh7          | chr3:137880736-137895006  | 58.82346667 | 94.59316667 |
| Setd3         | chr12:109344640-109417494 | 58.78823333 | 38.3529     |
| Tstd1         | chr1:173349163-173350483  | 58.78426667 | 9.473973333 |
| Zbtb20        | chr16:43247396-43619236   | 58.7565     | 22.74466667 |
| Ndufa9        | chr6:126771880-126799162  | 58.74806667 | 61.18546667 |
| Agap1         | chr1:91351385-91791857    | 58.66313333 | 56.8541     |
| Ndufc1        | chr3:51209400-51212877    | 58.6508     | 66.34323333 |
| Ccnl2         | chr4:155186597-155198652  | 58.64896667 | 68.03073333 |
| Rbmx          | chrX:54636524-54646213    | 58.566      | 32.1639     |
| Ubl7          | chr9:57758792-57777775    | 58.54653333 | 60.96556667 |
| Gpbp1         | chr13:112215887-112280249 | 58.48696667 | 54.91506667 |
| 1110032A03Rik | chr9:50570932-50576257    | 58.42676667 | 49.2667     |
| Hcn1          | chr13:118391126-118769835 | 58.38856667 | 48.7272     |
| Naa38         | chr6:18798634-18804052    | 58.36406667 | 37.33843333 |
| Copa          | chr1:174012659-174052463  | 58.27546667 | 58.21713333 |
| Ak4           | chr4:101091893-101140376  | 58.26876667 | 8.699326667 |
| Bcap31        | chrX:70931521-70961514    | 58.25336667 | 126.063     |
| D19Ertd737e   | chr19:60274488-60302600   | 58.25236667 | 24.50816667 |
| Etv6          | chr6:133985724-134220165  | 58.2506     | 96.4081     |
| Tmbim1        | chr1:74334820-74350910    | 58.23356667 | 79.9743     |
| Suv420h1      | chr19:3767420-3818303     | 58.2071     | 41.25283333 |
| Eif3k         | chr7:29756391-29766833    | 58.1542     | 77.14453333 |
| Map1lc3a      | chr2:155102099-155103809  | 58.151      | 31.1217     |
| Ngb           | chr12:88438480-88443489   | 58.05323333 | 62.1051     |
| S100a14       | chr3:90330770-90332757    | 58.04446667 | 131.6643667 |
| Twf1          | chr15:94408378-94420255   | 58.01733333 | 48.3028     |



|               |                           |             |             |
|---------------|---------------------------|-------------|-------------|
| Chd7          | chr4:8618067-8793956      | 57.99783333 | 47.65286667 |
| Ankrd11       | chr8:125407721-125566184  | 57.98176667 | 48.26126667 |
| Csnk2b        | chr17:35253139-35258392   | 57.97676667 | 90.38256667 |
| Setd5         | chr6:113027632-113103418  | 57.95056667 | 60.07556667 |
| Safb          | chr17:56724404-56745717   | 57.9283     | 36.4256     |
| Grina         | chr15:76077236-76080334   | 57.78676667 | 50.52286667 |
| Larp4b        | chr13:9093150-9172336     | 57.75896667 | 48.69996667 |
| Nr4a1         | chr15:101097276-101105225 | 57.7512     | 84.15503333 |
| Mll3          | chr5:24777611-25004601    | 57.73163333 | 50.76543333 |
| Rpl28         | chr7:4744566-4746149      | 57.709      | 76.44036667 |
| Erbp2ip       | chr13:104608865-104710594 | 57.69866667 | 50.6583     |
| Ech1          | chr7:29610356-29617258    | 57.67763333 | 34.95486667 |
| 5930434B04Rik | chr2:26865445-26876609    | 57.6504     | 54.75203333 |
| Ptges3        | chr10:127496037-127514310 | 57.64056667 | 56.26423333 |
| Tas2r124      | chr6:132704747-132705677  | 57.63413333 | 0.118274    |
| Mark2         | chr19:7349885-7416334     | 57.56683333 | 59.33316667 |
| Fam162a       | chr16:36043929-36071601   | 57.53943333 | 92.394      |
| Ypel3         | chr7:133920488-133924028  | 57.52136667 | 93.7715     |
| Serinc3       | chr2:163449008-163470879  | 57.4803     | 59.75346667 |
| Snora7a       | chr6:115757992-115758121  | 57.478      | 10.328      |
| Rpl37         | chr15:5066612-5069140     | 57.47473333 | 72.64916667 |
| Ap3m2         | chr8:23897825-23916126    | 57.46436667 | 17.28763333 |
| Mt2           | chr8:96696517-96697467    | 57.43466667 | 360.0712667 |
| Triobp        | chr15:78778153-78836299   | 57.4207     | 46.45813333 |
| 2610019E17Rik | chr17:24665195-24665689   | 57.41228    | 54.14453333 |
| Vezf1         | chr11:87881842-87898231   | 57.40026667 | 43.3172     |
| Klk11         | chr7:51029986-51034632    | 57.3709     | 68.24066667 |
| Tnip1         | chr11:54724288-54776442   | 57.36553333 | 53.8621     |
| Hsf2          | chr10:57206190-57232949   | 57.3442     | 39.17426667 |
| Rnf113a2      | chr12:85758149-85759528   | 57.29113333 | 43.29243333 |
| Mea1          | chr17:46818085-46820054   | 57.2691     | 43.6274     |
| Slmo2         | chr2:174290591-174298442  | 57.261      | 61.4779     |
| Ada           | chr2:163552319-163575913  | 57.24293333 | 128.6981667 |
| Calml3        | chr13:3802138-3803564     | 57.23893333 | 125.9125    |
| Sirt7         | chr11:120479685-120486316 | 57.2344     | 38.5132     |
| Atxn7l3b      | chr10:112362483-112366082 | 57.22896667 | 52.43583333 |
| Tomm22        | chr15:79501297-79503292   | 57.19436667 | 76.44133333 |
| Ssu72         | chr4:155078923-155107982  | 57.19293333 | 47.5806     |
| Atp6v0e       | chr17:26813340-26836591   | 57.1884     | 98.55286667 |
| Psmc1         | chr12:101350540-101361574 | 57.14643333 | 50.3165     |
| Utp3          | chr5:88983507-88985108    | 57.10653333 | 45.337      |
| Ltv1          | chr10:12898443-12912943   | 57.10196667 | 64.20133333 |
| Sar1a         | chr10:61143068-61156045   | 57.04836667 | 59.4795     |
| Ndufs2        | chr1:173164990-173177243  | 57.02873333 | 57.28226667 |
| Rpl15         | chr14:19100336-19103500   | 57.02303333 | 69.992      |
| Egr3          | chr14:70477251-70479964   | 57.02206667 | 14.35174    |
| Ankrd17       | chr5:90656190-90795211    | 56.96713333 | 54.27013333 |
| Trim29        | chr9:43118845-43144208    | 56.9041     | 48.8219     |
| Snrpd2        | chr7:19735186-19738075    | 56.87966667 | 39.55663333 |
| Tprgl         | chr4:153531594-153534793  | 56.85923333 | 49.54983333 |
| Tulp4         | chr17:6106829-6240637     | 56.85646667 | 56.6588     |
| Pja2          | chr17:64630354-64681223   | 56.73356667 | 63.6494     |

|               |                           |             |             |
|---------------|---------------------------|-------------|-------------|
| Ppp1r10       | chr17:36053855-36069228   | 56.73023333 | 38.2187     |
| Ensa          | chr3:95428901-95436039    | 56.7257     | 43.03966667 |
| Midn          | chr10:79611034-79621112   | 56.7132     | 64.1566     |
| Npm1          | chr11:33052497-33063206   | 56.60616667 | 66.8886     |
| Capn2         | chr1:184397389-184447614  | 56.57503333 | 49.3166     |
| Mrpl42        | chr10:94943439-94964561   | 56.55356667 | 71.22126667 |
| Cbr1          | chr16:93608081-93610594   | 56.52696667 | 30.76446667 |
| Kcmf1         | chr6:72791107-72849973    | 56.4917     | 48.44613333 |
| Rere          | chr4:149656024-149996075  | 56.48983333 | 41.7465     |
| Mtap1a        | chr2:121115337-121136568  | 56.48623333 | 46.10423333 |
| Copb2         | chr9:98464149-98488794    | 56.47783333 | 66.91836667 |
| Ccnt2         | chr1:129670740-129701414  | 56.39916667 | 29.32826667 |
| AV039307      | chr2:120676391-120692426  | 56.38106667 | 9.610503333 |
| Nov           | chr15:54577482-54585316   | 56.36893333 | 12.23736333 |
| Rpl24         | chr16:55966387-55971550   | 56.35276667 | 81.59236667 |
| Krt7          | chr15:101242833-101258237 | 56.33963333 | 115.6930333 |
| Smc3          | chr19:53674885-53720321   | 56.3237     | 57.88683333 |
| Aftph         | chr11:20585087-20641551   | 56.2802     | 64.40393333 |
| Aco2          | chr15:81702892-81745567   | 56.2609     | 66.27723333 |
| Abhd11        | chr5:135485021-135488045  | 56.09126667 | 25.1008     |
| Cops4         | chr5:100947327-100976821  | 56.05766667 | 71.4753     |
| Sf1           | chr19:6363689-6378038     | 56.0307     | 52.25033333 |
| Mtpn          | chr6:35458823-35489888    | 56.0033     | 59.6072     |
| Bloc1s1       | chr10:128356969-128360580 | 55.9947     | 45.9789     |
| Igfbp5        | chr1:72904638-72921439    | 55.93453333 | 143.16      |
| 6720401G13Rik | chrX:47908920-47988435    | 55.91653333 | 36.18513333 |
| Pisd-ps1      | chr11:3024023-3031947     | 55.911      | 67.19086667 |
| Mtcp1         | chrX:72650185-72661882    | 55.89806667 | 8.525394    |
| Ii25          | chr14:55551531-55554673   | 55.87143333 | 7.633623333 |
| Isca2         | chr12:86114219-86116039   | 55.86086667 | 86.9951     |
| Rps29         | chr12:70258708-70260173   | 55.82543333 | 56.2811     |
| Syne2         | chr12:76919304-77211915   | 55.805      | 37.6297     |
| Ncoa6         | chr2:155216391-155266519  | 55.75056667 | 72.51043333 |
| Nus1          | chr10:52137352-52159998   | 55.7503     | 21.56476667 |
| Enc1          | chr13:98011059-98022995   | 55.73783333 | 17.1633     |
| Cdk11b        | chr4:154998977-155024041  | 55.72973333 | 42.86403333 |
| Mt1           | chr8:96702988-96704227    | 55.71563333 | 145.1444    |
| Prpf8         | chr11:75300278-75322949   | 55.68296667 | 58.0172     |
| Hnnpnr        | chr4:135866890-135896593  | 55.6493     | 63.17496667 |
| C330021F23Rik | chr8:3567997-3584776      | 55.50753333 | 75.306      |
| 0610010O12Rik | chr18:36508277-36553024   | 55.4727     | 26.1549     |
| Capsl         | chr15:9365782-9395790     | 55.45376667 | 41.41809333 |
| Fam102a       | chr2:32390878-32425270    | 55.4162     | 52.47063333 |
| Mmadhc        | chr2:50135400-50152197    | 55.38306667 | 66.8019     |
| 1110021J02Rik | chr17:29832921-29853962   | 55.3541     | 29.29576667 |
| Bcl10         | chr3:145587341-145597247  | 55.34693333 | 41.96623333 |
| Bmpr2         | chr1:59821480-59927703    | 55.29086667 | 52.70193333 |
| Phpt1         | chr2:25428950-25430391    | 55.2855     | 34.76923333 |
| Itsn2         | chr12:4599813-4720758     | 55.26653333 | 50.5188     |
| Jak1          | chr4:100824578-100937887  | 55.2056     | 45.9039     |
| Tceal8        | chrX:132703522-132706790  | 55.1454     | 44.81556667 |
| Znr1          | chr17:37091302-37095373   | 55.11053333 | 42.81296667 |

|               |                           |             |             |
|---------------|---------------------------|-------------|-------------|
| Mef2d         | chr3:87946316-87973089    | 55.1068     | 54.48746667 |
| Carhsp1       | chr16:8658679-8672246     | 55.10086667 | 43.70133333 |
| Al661453      | chr17:47573587-47607587   | 55.08213333 | 59.58176667 |
| Tle4          | chr19:14522561-14672473   | 55.0821     | 67.14643333 |
| Csad          | chr15:102007428-102019474 | 55.06726667 | 15.59416667 |
| Rheb          | chr5:24308640-24348179    | 55.0641     | 64.8759     |
| Dnajb6        | chr5:30062437-30113018    | 55.00776667 | 69.9666     |
| Atp8a1        | chr5:68009379-68238670    | 54.89763333 | 47.67746667 |
| Arcn1         | chr9:44550227-44575891    | 54.89346667 | 43.82656667 |
| I7Rn6         | chr7:97067198-97089695    | 54.81913333 | 41.53873333 |
| Tspan3        | chr9:55983690-56008877    | 54.75383333 | 67.72253333 |
| Idh3g         | chrX:71024301-71032236    | 54.73806667 | 50.30443333 |
| Polr2a        | chr11:69547911-69571725   | 54.72386667 | 47.81096667 |
| Pcdhgb1       | chr18:37840111-38001524   | 54.68583333 | 24.00066667 |
| Ppp2r1a       | chr17:21082417-21102869   | 54.6082     | 73.3108     |
| Scamp4        | chr10:80065626-80078528   | 54.5994     | 102.2467667 |
| Zbtb7a        | chr10:80599015-80614402   | 54.5688     | 40.91303333 |
| Lage3         | chrX:71597500-71598957    | 54.52023333 | 45.64056667 |
| Rnaset2b      | chr17:7183208-7202542     | 54.50193333 | 29.1313     |
| Jmjd1c        | chr10:66590005-66719074   | 54.49266667 | 56.0163     |
| 1810013L24Rik | chr16:8830192-8859017     | 54.48863333 | 59.89933333 |
| Mir1931       | chr10:92625529-92625648   | 54.43866667 | 0           |
| Rad23b        | chr4:55362913-55405109    | 54.434      | 54.48953333 |
| Uso1          | chr5:92566963-92631821    | 54.40923333 | 60.67696667 |
| Ugt8a         | chr3:125568260-125641468  | 54.39586667 | 49.79343333 |
| Asb11         | chrX:160876032-160897032  | 54.3629     | 0.245282667 |
| Vmp1          | chr11:86397366-86497324   | 54.3563     | 51.3379     |
| Sh3glb1       | chr3:144351807-144383287  | 54.33993333 | 37.12056667 |
| Abi1          | chr2:22795508-22895760    | 54.29676667 | 51.87406667 |
| Lrrc56        | chr7:148380028-148395954  | 54.28426667 | 29.31773333 |
| Adi1          | chr12:29360071-29367039   | 54.26223333 | 69.37513333 |
| Amot          | chrX:141880966-141921589  | 54.2554     | 15.50645    |
| Cyp2g1        | chr7:27593945-27606216    | 54.1697     | 0.434093    |
| Mtch1         | chr17:29469020-29484849   | 54.133      | 62.00713333 |
| Ube2h         | chr6:30161288-30254539    | 54.11736667 | 46.5634     |
| Sin3b         | chr8:75247186-75282102    | 54.1152     | 49.227      |
| Srsf7         | chr17:80599419-80606645   | 54.11506667 | 66.13406667 |
| GlrX5         | chr12:106270898-106279120 | 54.11423333 | 50.65283333 |
| Atp6v1c1      | chr15:38591658-38622199   | 54.10356667 | 42.70523333 |
| Ptbp1         | chr10:79317349-79327178   | 54.0804     | 101.7242667 |
| Xbp1          | chr11:5420969-5425875     | 54.0196     | 110.8223667 |
| Ptgs1         | chr2:36085945-36107789    | 54.00063333 | 75.99306667 |
| Cd47          | chr16:49855766-49911796   | 53.95413333 | 46.1077     |
| Ctage5        | chr12:60230732-60291207   | 53.93913333 | 41.94133333 |
| Krt14         | chr11:100064475-100068824 | 53.83003333 | 117.1758667 |
| Cct4          | chr11:22890592-22903336   | 53.78786667 | 73.63896667 |
| Fip1l1        | chr5:74931506-74993149    | 53.7746     | 31.4238     |
| Rnf181        | chr6:72309707-72312375    | 53.75456667 | 42.6948     |
| Gm5918        | chr9:72827532-72833183    | 53.74886667 | 23.87363667 |
| Pkp4          | chr2:58998906-59193262    | 53.73066667 | 43.49096667 |
| Ank3          | chr10:68996455-69490184   | 53.7222     | 41.5343     |
| Coro1b        | chr19:4148662-4154035     | 53.72       | 42.3356     |

|            |                           |             |             |
|------------|---------------------------|-------------|-------------|
| Fam58b     | chr11:78564007-78565231   | 53.69723333 | 10.29856    |
| Ptprf      | chr4:117880817-117964002  | 53.69516667 | 40.69406667 |
| Ubl3       | chr5:149316206-149364364  | 53.6802     | 20.244      |
| Nktr       | chr9:121628298-121665959  | 53.6773     | 51.982      |
| G3bp2      | chr5:92481171-92512761    | 53.67653333 | 66.1573     |
| Commd6     | chr14:102032982-102039688 | 53.6713     | 40.64636667 |
| H2afy      | chr13:56174982-56236911   | 53.65036667 | 71.4695     |
| Hint2      | chr4:43667098-43669317    | 53.6318     | 64.41033333 |
| Ctdsp2     | chr10:126415772-126437031 | 53.62753333 | 53.0932     |
| Tpm4       | chr8:74659190-74677028    | 53.62196667 | 104.2445    |
| Arc3       | chr5:122841936-122856187  | 53.60513333 | 63.0905     |
| Git1       | chr11:77306913-77321276   | 53.57873333 | 49.30116667 |
| Psmc1      | chr1:87961193-88035870    | 53.5622     | 67.62813333 |
| Degs2      | chr12:109925001-109940516 | 53.5542     | 99.4099     |
| Zc3h11a    | chr1:135516447-135557957  | 53.50156667 | 79.47543333 |
| Leprotl1   | chr8:35198625-35209793    | 53.496      | 29.7894     |
| Cpsf7      | chr19:10599733-10622225   | 53.47043333 | 40.44533333 |
| Hspa9      | chr18:35097068-35114005   | 53.4042     | 46.75813333 |
| Pptc7      | chr5:122734406-122774290  | 53.39066667 | 58.48763333 |
| Prdx5      | chr19:6981308-6984135     | 53.37083333 | 61.81273333 |
| Srsf1      | chr11:87861172-87867259   | 53.33846667 | 47.89423333 |
| BC002163   | chr4:123389952-123395404  | 53.33703333 | 23.54016667 |
| Gltscr2    | chr7:16523184-16531457    | 53.30796667 | 62.29466667 |
| Ppp1r15a   | chr7:52778287-52781638    | 53.30636667 | 36.7967     |
| Cyb5       | chr18:85020805-85049255   | 53.27316667 | 85.53116667 |
| Slc44a2    | chr9:21125162-21159472    | 53.25803333 | 83.2038     |
| Gm10094    | chr14:58417054-58421167   | 53.24423333 | 25.40416667 |
| Kcnj2      | chr11:110927477-110938139 | 53.15723333 | 25.18796667 |
| Yy1        | chr12:110031520-110054842 | 53.15523333 | 34.2977     |
| C77080     | chr4:128896821-128925687  | 53.14303333 | 48.82023333 |
| Tmem60     | chr5:20388270-20392688    | 53.07196667 | 44.42763333 |
| Nfix       | chr8:87231497-87324239    | 53.02476667 | 91.30133333 |
| Spcs1      | chr14:31813011-31814852   | 53.00556667 | 47.48056667 |
| Mapk3      | chr7:133903139-133909330  | 52.98396667 | 46.53213333 |
| Mll2       | chr15:98662099-98701636   | 52.9217     | 42.6031     |
| Ahcyl1     | chr3:107466037-107499466  | 52.8938     | 41.90573333 |
| Phyh       | chr2:4840041-4859789      | 52.88946667 | 46.1867     |
| Psmc2      | chr5:21291100-21309602    | 52.8763     | 75.86466667 |
| Hnrnpa3    | chr2:75497315-75507464    | 52.81276667 | 57.03896667 |
| Cnpy1      | chr5:28532002-28564413    | 52.8067     | 118.0553333 |
| Eif4h      | chr5:135095745-135115198  | 52.77473333 | 57.02       |
| Brp44      | chr1:167391338-167411345  | 52.7527     | 73.7519     |
| Glo1       | chr17:30729806-30749604   | 52.7005     | 45.2197     |
| Zbed6      | chr1:135552455-135557462  | 52.62683333 | 52.62933333 |
| Nipbl      | chr15:8241224-8394463     | 52.62003333 | 54.74833333 |
| Tpm3       | chr3:89876572-89904824    | 52.61073333 | 64.94273333 |
| Hist2h2aa1 | chr3:96049460-96050038    | 52.60566667 | 30.19346667 |
| Ube2v1     | chr2:167433138-167457505  | 52.5874     | 51.9906     |
| Crip2      | chr12:114378446-114383717 | 52.56456667 | 49.9861     |
| Hist2h2aa1 | chr3:96043638-96044216    | 52.54923333 | 30.1866     |
| Rsph1      | chr17:31391964-31414301   | 52.50586667 | 13.45868    |
| Shc2       | chr10:79080682-79100663   | 52.47913333 | 36.84713333 |

|               |                           |             |             |
|---------------|---------------------------|-------------|-------------|
| Clint1        | chr11:45665465-45724127   | 52.4316     | 50.9496     |
| Hbxip         | chr3:107081775-107086999  | 52.3789     | 42.77434333 |
| Aff1          | chr5:104183180-104284341  | 52.35123333 | 54.66703333 |
| H47           | chr7:73224534-73234291    | 52.32866667 | 45.93973333 |
| Ubxn2a        | chr12:4885837-4914326     | 52.28946667 | 48.4413     |
| Add1          | chr5:34916362-34974954    | 52.25866667 | 56.21103333 |
| Slc9a3r1      | chr11:115024654-115042492 | 52.24253333 | 37.24156667 |
| Spib          | chr7:51781364-51787441    | 52.1678     | 125.6341667 |
| Abr           | chr11:76230235-76391229   | 52.1567     | 52.14273333 |
| Calhm1        | chr19:47215524-47218664   | 52.15506667 | 48.9399     |
| Arl6ip1       | chr7:125262403-125273139  | 52.08526667 | 76.22566667 |
| Sdhc          | chr1:173059287-173080734  | 52.06246667 | 53.4168     |
| Fras1         | chr5:96802973-97213747    | 52.04856667 | 11.18413    |
| Arl2          | chr19:6134388-6141137     | 52.04253333 | 68.6062     |
| Sbsn          | chr7:31536489-31541153    | 52.02873333 | 74.38253333 |
| Ddx6          | chr9:44412974-44448814    | 52.01376667 | 69.91166667 |
| Lass6         | chr2:68699613-68949347    | 51.9191     | 31.5715     |
| Sub1          | chr15:11911093-11925762   | 51.91526667 | 42.3772     |
| Inadl         | chr4:98062516-98386294    | 51.90253333 | 25.4555     |
| Tas1r1        | chr4:151402022-151412599  | 51.89763333 | 44.9992     |
| Sec61b        | chr4:47487532-47496105    | 51.84446667 | 27.69803333 |
| Rpl34         | chr3:130429748-130433226  | 51.83963333 | 102.1116333 |
| Rara          | chr11:98799009-98836256   | 51.82113333 | 22.4618     |
| Rnf38         | chr4:44139083-44181155    | 51.81886667 | 93.39726667 |
| Rpp21         | chr17:36392617-36394791   | 51.77356667 | 61.50396667 |
| Gng12         | chr6:66846390-66971355    | 51.7492     | 19.3288     |
| Ap1g1         | chr8:112302539-112388108  | 51.62766667 | 39.17786667 |
| Gtf3c1        | chr7:132784467-132851202  | 51.60776667 | 36.409      |
| Rps4y2        | chr6:148303177-148304118  | 51.5883     | 10.72487333 |
| Utrn          | chr10:12101985-12581533   | 51.58346667 | 41.12846667 |
| Sfn           | chr4:133156470-133158083  | 51.55633333 | 111.4027    |
| Top2b         | chr14:17197719-17263301   | 51.52063333 | 71.6932     |
| Polr2f        | chr15:78971796-78982197   | 51.49396667 | 43.9167     |
| Tug1          | chr11:3539796-3548811     | 51.46993333 | 81.9237     |
| 2810013P06Rik | chr8:125566474-125568502  | 51.43893333 | 23.55487667 |
| Lphn3         | chr5:81450617-82224755    | 51.41293333 | 50.21613333 |
| Scnn1a        | chr6:125271357-125294960  | 51.37103333 | 59.35516667 |
| Myo5b         | chr18:74602272-74931131   | 51.34503333 | 47.49746667 |
| Brd1          | chr15:88517464-88564649   | 51.30653333 | 34.14986667 |
| Arhgap12      | chr18:6024447-6136096     | 51.2706     | 21.89763333 |
| Mpp7          | chr18:7347959-7626861     | 51.24153333 | 34.10293333 |
| Sgtb          | chr13:104899869-104931521 | 51.19293333 | 17.9648     |
| 2810407C02Rik | chr3:58380579-58397466    | 51.18833333 | 61.014      |
| Dnajc5        | chr2:181255209-181286954  | 51.15906667 | 41.13806667 |
| Fam96a        | chr9:65974417-65986775    | 51.15553333 | 40.142      |
| Rer1          | chr4:154448220-154460406  | 51.12606667 | 27.42113333 |
| Fdx1l         | chr9:20871963-20877958    | 51.11676667 | 20.21102667 |
| Atg3          | chr16:45158941-45188651   | 51.11046667 | 26.64806667 |
| Smc1a         | chrX:148450970-148496516  | 51.09423333 | 44.32526667 |
| Pan3          | chr5:148242155-148360077  | 51.09113333 | 36.61436667 |
| Timm8b        | chr9:50412005-50413425    | 51.0849     | 56.01773333 |
| Snora23       | chr7:117189877-117190061  | 51.04846667 | 124.9977    |

|               |                           |             |             |
|---------------|---------------------------|-------------|-------------|
| Hnrnpc        | chr14:52693054-52723703   | 51.03536667 | 47.0362     |
| Bcl2l2        | chr14:55502261-55507071   | 50.98853333 | 18.97573333 |
| Gm5617        | chr9:48303449-48304077    | 50.97936667 | 29.902      |
| Hivep2        | chr10:13686184-13871184   | 50.9642     | 17.4745     |
| Kdm6a         | chrX:17739792-17856484    | 50.9565     | 94.41293333 |
| 1600020E01Rik | chr6:86477323-86514443    | 50.925      | 11.37241    |
| Rpl27a        | chr7:116662708-116665883  | 50.91816667 | 72.98856667 |
| Rpl35a        | chr16:33056538-33060274   | 50.89166667 | 53.87613333 |
| Sqstm1        | chr11:50013653-50024292   | 50.88676667 | 56.85586667 |
| Ogdh          | chr11:6191599-6259097     | 50.88146667 | 48.06746667 |
| Ankrd12       | chr17:66316840-66426386   | 50.78893333 | 38.6936     |
| Pttg1         | chr11:43233749-43239750   | 50.76093333 | 48.84326667 |
| 6720456B07Rik | chr6:113554765-113566945  | 50.75716667 | 63.5357     |
| Stk11         | chr10:79579280-79593215   | 50.74913333 | 60.52176667 |
| Lpin2         | chr17:71533317-71599158   | 50.74203333 | 48.37786667 |
| Gstk1         | chr6:42195933-42200440    | 50.74033333 | 12.23968333 |
| Ktn1          | chr14:48283430-48356239   | 50.72136667 | 69.23623333 |
| Gstz1         | chr12:88488114-88505673   | 50.68333333 | 72.85726667 |
| Mycbp         | chr4:123582255-123589493  | 50.66076667 | 52.3696     |
| Olf1414       | chr1:94407624-94415092    | 50.58573333 | 8.072306667 |
| Ndufa6        | chr15:82180568-82184721   | 50.53936667 | 30.7464     |
| Rnf20         | chr4:49644931-49669758    | 50.46856667 | 29.2654     |
| Ndufb6        | chr4:40217695-40226401    | 50.43986667 | 67.7054     |
| Lypd3         | chr7:25421588-25426137    | 50.43446667 | 110.6596667 |
| Mrpl54        | chr10:80727466-80729671   | 50.3772     | 44.38783333 |
| Pold3         | chr7:107230622-107270010  | 50.3744     | 22.58003333 |
| Apc           | chr18:34380637-34481844   | 50.36173333 | 56.67776667 |
| Tra2b         | chr16:22245813-22266002   | 50.3511     | 46.4594     |
| Far1          | chr7:120657375-120713972  | 50.20613333 | 19.09658667 |
| Ntng2         | chr2:29050340-29103560    | 50.19436667 | 38.05833333 |
| Sfxn3         | chr19:45122065-45130873   | 50.18946667 | 23.2265     |
| Panx1         | chr9:14810228-14849922    | 50.1322     | 29.11433333 |
| Ssr2          | chr3:88383592-88392335    | 50.1123     | 41.6316     |
| Mir698        | chr4:124421024-124421133  | 50.065      | 0           |
| Ndufb8        | chr19:44624743-44629905   | 50.0228     | 89.549      |
| Xkrx          | chrX:130683583-130696467  | 50.01446667 | 15.48900333 |
| Rbbp7         | chrX:159198303-159217022  | 50.01433333 | 59.1418     |
| Cul1          | chr6:47404322-47476138    | 49.9886     | 57.87936667 |
| Ube2e1        | chr14:19115242-19164358   | 49.98813333 | 42.8737     |
| Snw1          | chr12:88790859-88813249   | 49.8978     | 41.0598     |
| Gng5          | chr3:146162799-146168507  | 49.8515     | 59.4848     |
| H2afx         | chr9:44142797-44144156    | 49.849      | 25.45027667 |
| Mphosph8      | chr14:57287084-57316266   | 49.8422     | 39.16716667 |
| G6pc3         | chr11:102051012-102055396 | 49.82833333 | 58.3205     |
| Arid2         | chr15:96117952-96235894   | 49.81076667 | 48.23173333 |
| Set           | chr2:29917515-29928097    | 49.8072     | 68.5243     |
| Yipf6         | chrX:96133119-96144359    | 49.79506667 | 54.30446667 |
| Arl8b         | chr6:108733052-108773717  | 49.7855     | 52.64353333 |
| Gm6222        | chrX:100958255-100958884  | 49.78283333 | 56.01743333 |
| Pde4d         | chr13:109444370-110746177 | 49.77716667 | 20.76136667 |
| Erh           | chr12:81735009-81744848   | 49.71556667 | 64.43006667 |
| Etfa          | chr9:55302242-55360050    | 49.6749     | 66.41106667 |

|               |                           |             |             |
|---------------|---------------------------|-------------|-------------|
| Hpgds         | chr6:65067286-65094724    | 49.66663333 | 35.11076667 |
| BC005624      | chr2:30828352-30837461    | 49.6494     | 21.48423333 |
| Asns          | chr6:7625170-7643182      | 49.6432     | 31.2371     |
| Tnc           | chr4:63620818-63708049    | 49.62726667 | 1.225928    |
| Elf1          | chr14:79881000-79982283   | 49.61003333 | 43.4109     |
| Cyfip1        | chr7:63097440-63188003    | 49.6076     | 27.0149     |
| Psmid8        | chr7:29959205-29965692    | 49.5877     | 40.1074     |
| Esrp1         | chr4:11259184-11313930    | 49.5818     | 72.8814     |
| 1110058L19Rik | chr1:24002777-24012479    | 49.57483333 | 32.87421    |
| Inpp5j        | chr11:3394274-3404824     | 49.54683333 | 99.99256667 |
| Tm9sf4        | chr2:152987036-153036199  | 49.54296667 | 21.9941     |
| Vamp3         | chr4:150421413-150432062  | 49.52613333 | 46.169      |
| Copz1         | chr15:103103348-103130295 | 49.5246     | 54.5151     |
| Tcf20         | chr15:82639054-82742564   | 49.51513333 | 47.01733333 |
| Efha1         | chr14:58535116-58618099   | 49.4828     | 57.82266667 |
| Hexim1        | chr11:102977638-102981038 | 49.41803333 | 36.9005     |
| Rpl22         | chr4:151699986-151708180  | 49.39396667 | 70.06093333 |
| Dek           | chr13:47180135-47201589   | 49.33106667 | 47.6202     |
| Smurf2        | chr11:106681377-106782029 | 49.29976667 | 46.19973333 |
| Trip11        | chr12:103075581-103151381 | 49.27743333 | 49.33643333 |
| Cdk16         | chrX:20265618-20277003    | 49.2537     | 41.06303333 |
| Baz2a         | chr10:127529838-127566359 | 49.24196667 | 51.75203333 |
| Atn1          | chr6:124692561-124706505  | 49.24003333 | 35.57153333 |
| Ccndbp1       | chr2:120834143-120842648  | 49.22106667 | 75.78636667 |
| Rps16         | chr7:29135707-29137717    | 49.1957     | 68.47683333 |
| Elovl7        | chr13:109004597-109077301 | 49.19543333 | 28.56643333 |
| Ddx1          | chr12:13226112-13255980   | 49.17636667 | 35.00753333 |
| Ctcf          | chr8:108160437-108206822  | 49.16006667 | 34.93766667 |
| Tram1         | chr1:13554782-13579945    | 49.15463333 | 68.343      |
| D17Wsu92e     | chr17:27888179-27957487   | 49.07613333 | 57.67456667 |
| Psm4          | chr9:54798665-54805837    | 49.0607     | 84.6703     |
| Sri           | chr5:8046079-8069245      | 49.05516667 | 32.32336667 |
| Fam173a       | chr17:25927450-25929229   | 48.9268     | 47.28956667 |
| 2310045N01Rik | chr8:72663611-72671159    | 48.87163333 | 43.51546667 |
| Puf60         | chr15:75900611-75911376   | 48.85333333 | 33.4997     |
| Ndufb5        | chr3:32635984-32650481    | 48.84423333 | 98.60966667 |
| Sh2d7         | chr9:54386790-54392827    | 48.84383333 | 9.08166667  |
| 1700081L11Rik | chr11:104194542-104303605 | 48.83873333 | 51.3219     |
| Cnpy2         | chr10:127759514-127764243 | 48.8226     | 34.20633333 |
| Arf6          | chr12:70473136-70476967   | 48.81556667 | 50.2452     |
| Fgfr1op2      | chr6:146526432-146547720  | 48.78036667 | 28.2655     |
| Hyou1         | chr9:44187572-44200452    | 48.77213333 | 68.1429     |
| Tmed8         | chr12:88507191-88541179   | 48.7445     | 27.5827     |
| Tbl1x         | chrX:74756565-74905604    | 48.7207     | 43.7234     |
| B4galt5       | chr2:167123944-167174678  | 48.66683333 | 26.6352     |
| Slc3a2        | chr19:8781371-8797859     | 48.6215     | 24.49083333 |
| Sik3          | chr9:45820902-46032277    | 48.5839     | 31.8694     |
| Htatsf1       | chrX:54306746-54320359    | 48.5497     | 61.584      |
| Cops3         | chr11:59631305-59653269   | 48.53933333 | 43.55773333 |
| Ddt           | chr10:75233977-75236119   | 48.5203     | 52.19723333 |
| Tpd52         | chr3:8929435-9004515      | 48.4946     | 69.3843     |
| Brd7          | chr8:90856209-90886090    | 48.46283333 | 50.75923333 |

|               |                           |             |             |
|---------------|---------------------------|-------------|-------------|
| Tnks2         | chr19:36908721-36967967   | 48.45156667 | 72.04726667 |
| Madd          | chr2:90977516-91023204    | 48.4099     | 49.24826667 |
| Ccnk          | chr12:109417947-109441569 | 48.40663333 | 36.86583333 |
| Mrpl24        | chr3:87723465-87727355    | 48.40223333 | 43.6843     |
| Actn4         | chr7:29678272-29747299    | 48.40176667 | 71.30886667 |
| Gm6654        | chr6:146595698-146596324  | 48.34803333 | 65.74626667 |
| Zdhhc24       | chr19:4878667-4885397     | 48.3378     | 37.16366667 |
| Rpl31         | chr1:39424695-39428755    | 48.30266667 | 60.64203333 |
| Eif1b         | chr9:120401723-120404445  | 48.28846667 | 31.06841633 |
| Sdhd          | chr9:50404444-50411954    | 48.27243333 | 39.3112     |
| Csnk1d        | chr11:120823054-120852647 | 48.24566667 | 44.58236667 |
| Tspyl4        | chr10:34017226-34021126   | 48.2414     | 44.57223333 |
| Plekhg5       | chr4:151470827-151489509  | 48.13796667 | 29.02436667 |
| Kidins220     | chr12:25659796-25744562   | 48.13596667 | 50.07526667 |
| Taf15         | chr11:83286609-83320242   | 48.05096667 | 18.32684333 |
| Rnaset2a      | chr17:8321462-8340653     | 48.0454     | 22.5216     |
| Marveld2      | chr13:101365911-101386926 | 48.0384     | 28.17476667 |
| Fam98a        | chr17:75936425-75951286   | 47.93026667 | 32.94073333 |
| Cr1l          | chr1:196929981-196957764  | 47.9217     | 54.04603333 |
| Glg1          | chr8:113681457-113783102  | 47.8882     | 44.17653333 |
| Nme2          | chr11:93811128-93817321   | 47.8244     | 76.50066667 |
| Klhdc7a       | chr4:139518087-139523941  | 47.76466667 | 45.87873333 |
| Fbxo22        | chr9:55056741-55072240    | 47.7338     | 34.08923333 |
| Usp16         | chr16:87455229-87483758   | 47.71386667 | 38.85456667 |
| Krt84         | chr15:101355456-101363251 | 47.69110333 | 98.86061667 |
| Zfp871        | chr17:32902441-32925232   | 47.67783333 | 61.28906667 |
| Gpatch8       | chr11:102337229-102417472 | 47.63206667 | 39.6489     |
| Bcas2         | chr3:102975633-102983077  | 47.63133333 | 53.7982     |
| Chchd1        | chr14:21522248-21523647   | 47.62986667 | 37.29933333 |
| Spint1        | chr2:119063095-119075249  | 47.6055     | 75.5201     |
| Mrpl33        | chr5:31916323-31925017    | 47.6036     | 86.71833333 |
| Dnmt3a        | chr12:3806979-3914443     | 47.5837     | 42.75443333 |
| Emp2          | chr16:10281841-10314061   | 47.56663333 | 130.777     |
| Pafah1b1      | chr11:74487450-74537886   | 47.54026667 | 47.3312     |
| Cables2       | chr2:179993243-180008170  | 47.53636667 | 31.44443333 |
| Calcoco1      | chr15:102537207-102552609 | 47.5096     | 34.874      |
| Abhd16a       | chr17:35226235-35239932   | 47.4923     | 31.50123333 |
| Zfc3h1        | chr10:114822014-114869827 | 47.473      | 43.1038     |
| Pdzd11        | chrX:97818244-97821246    | 47.45833333 | 52.40083333 |
| Tet2          | chr3:133126640-133207354  | 47.43363333 | 40.01806667 |
| Spire2        | chr8:125856612-125893418  | 47.412      | 27.23963333 |
| Zbed3         | chr13:96095191-96107796   | 47.37946667 | 37.7508     |
| Fam48a        | chr3:54497026-54520759    | 47.37516667 | 45.69833333 |
| Taf2          | chr15:54846683-54903707   | 47.32983333 | 24.53083333 |
| Hsd17b10      | chrX:148436438-148438985  | 47.30426667 | 81.30416667 |
| Ash1l         | chr3:88769733-88883297    | 47.3014     | 55.50663333 |
| Ttbk2         | chr2:120558551-120676320  | 47.2963     | 13.34843    |
| Plekha6       | chr1:135142673-135200012  | 47.27853333 | 15.74403    |
| Stx12         | chr4:132409978-132440373  | 47.27046667 | 45.06986667 |
| 4732418C07Rik | chr4:115410677-115449932  | 47.24303333 | 43.17356667 |
| Srsf6         | chr2:162757243-162762856  | 47.18626667 | 66.9405     |
| Capza2        | chr6:17587097-17616536    | 47.1763     | 40.70993333 |



|               |                           |             |             |
|---------------|---------------------------|-------------|-------------|
| Tet3          | chr6:83312367-83391672    | 47.15966667 | 50.08966667 |
| Pcm1          | chr8:42325112-42419441    | 47.15056667 | 55.9201     |
| Pgm2l1        | chr7:107376116-107427382  | 47.12826667 | 68.1809     |
| Rala          | chr13:17972408-18036051   | 47.0157     | 41.09833333 |
| Ndufa8        | chr2:35891853-35904812    | 47.0097     | 44.69286667 |
| Nsf           | chr11:103683096-103815370 | 46.96466667 | 54.78893333 |
| Mapre2        | chr18:23910833-24052362   | 46.9395     | 34.51633333 |
| Gse1          | chr8:123012765-123105283  | 46.9321     | 58.6094     |
| Ube2q1        | chr3:89577530-89587919    | 46.9307     | 33.96083333 |
| Scaf11        | chr15:96242128-96291274   | 46.91676667 | 37.08686667 |
| Wdr26         | chr1:183103356-183142109  | 46.89626667 | 82.827      |
| Vdac2         | chr14:22650782-22665101   | 46.81616667 | 91.18963333 |
| Usf2          | chr7:31730266-31741822    | 46.8017     | 27.54336667 |
| Stx5a         | chr19:8815913-8830132     | 46.7558     | 33.4817     |
| Atp6v1a       | chr16:44085516-44139132   | 46.7511     | 55.2851     |
| Mll1          | chr9:44611437-44689357    | 46.71283333 | 47.3023     |
| Rsl1d1        | chr16:11193129-11203385   | 46.69516667 | 71.3757     |
| Magoh         | chr4:107552417-107560003  | 46.6941     | 72.56886667 |
| Suc1g2        | chr6:95424127-95668831    | 46.64816667 | 17.4115     |
| Pum2          | chr12:8680939-8759389     | 46.63443333 | 56.54493333 |
| 2900011O08Rik | chr16:13986729-14101587   | 46.6245     | 60.80666667 |
| Efcab1        | chr16:14906738-14924615   | 46.60246667 | 123.7503667 |
| Prdx6         | chr1:163170242-163181297  | 46.53343333 | 61.42056667 |
| Sec24c        | chr14:21493542-21514072   | 46.53306667 | 46.1212     |
| Pcf11         | chr7:99792221-99818422    | 46.52006667 | 43.76103333 |
| Raver1        | chr9:20878608-20896432    | 46.49223333 | 39.7521     |
| Ifit1         | chr19:34715378-34724499   | 46.45896667 | 6.94772     |
| Pafah1b3      | chr7:26080067-26082974    | 46.43486667 | 51.2175     |
| Trip12        | chr1:84717763-84835879    | 46.43326667 | 47.7097     |
| Mllt10        | chr2:17976863-18134017    | 46.42653333 | 35.74773333 |
| Acly          | chr11:100337665-100389314 | 46.3638     | 31.65936667 |
| Cab39         | chr1:87690021-87748152    | 46.3455     | 36.92996667 |
| Mir681        | chr12:70864821-70864931   | 46.34333333 | 31.9147     |
| Mir218-1      | chr5:48615180-48615290    | 46.34333333 | 0           |
| Eif3e         | chr15:43081585-43114282   | 46.3084     | 69.89483333 |
| Hdac1         | chr4:129193347-129219890  | 46.3006     | 34.45003333 |
| Ppm1b         | chr17:85356080-85423332   | 46.27346667 | 48.55533333 |
| Utp6          | chr11:79747457-79775889   | 46.25073333 | 34.64133333 |
| Psm12         | chr11:107340841-107359350 | 46.2196     | 61.21613333 |
| Hdac2         | chr10:36694349-36721694   | 46.21126667 | 57.55263333 |
| Med13         | chr11:86079216-86171027   | 46.18933333 | 54.42846667 |
| Drap1         | chr19:5422823-5424916     | 46.14213333 | 37.27199    |
| Plp2          | chrX:7245241-7248404      | 46.0935     | 95.0971     |
| Cops6         | chr5:138602329-138605212  | 46.06236667 | 70.8034     |
| Psm14         | chr3:94836626-94846467    | 45.97763333 | 49.55263333 |
| Mterfd3       | chr10:84582177-84590772   | 45.9663     | 23.2937     |
| Setd7         | chr3:51319239-51364745    | 45.9188     | 27.39053333 |
| Aldh1a1       | chr19:20676471-20717952   | 45.879      | 53.906455   |
| Usp8          | chr2:126533063-126585050  | 45.86593333 | 50.65166667 |
| Ndufb7        | chr8:86090656-86095522    | 45.84063333 | 67.8203     |
| Tnrc6b        | chr15:80541742-80771516   | 45.8262     | 37.22116667 |
| Tmem86b       | chr7:4579641-4582084      | 45.82126667 | 35.75843333 |

|               |                           |             |             |
|---------------|---------------------------|-------------|-------------|
| Paf1          | chr7:29178014-29184402    | 45.7934     | 24.3655     |
| Gstm1         | chr3:107815167-107820891  | 45.78783333 | 103.9859    |
| Ube2k         | chr5:65928499-65990228    | 45.78603333 | 47.32876667 |
| Rpsa          | chr9:120036883-120041487  | 45.73363333 | 62.6963     |
| Fam122a       | chr19:24550268-24551964   | 45.7291     | 55.00976667 |
| Hmox2         | chr16:4726360-4766249     | 45.6924     | 39.26326667 |
| 2400003C14Rik | chr8:112195220-112217194  | 45.6566     | 32.24736667 |
| Fibp          | chr19:5460606-5465052     | 45.546      | 25.44196667 |
| Gcfc1         | chr16:91014281-91044624   | 45.53233333 | 34.90443333 |
| Actr1b        | chr1:36756046-36766770    | 45.5255     | 36.69426667 |
| Mcee          | chr7:71537656-71557005    | 45.4575     | 57.1567     |
| Vapa          | chr17:65929392-65962895   | 45.43976667 | 41.3507     |
| Whsc2         | chr5:34240828-34278907    | 45.42966667 | 32.92473333 |
| Cltb          | chr13:54694299-54712633   | 45.41613333 | 17.56396333 |
| Lsm3          | chr6:91466028-91472614    | 45.406      | 35.63096667 |
| 1500011B03Rik | chr5:115258204-115263985  | 45.40406667 | 32.03963333 |
| Pdpk1         | chr17:24210646-24278561   | 45.39866667 | 49.21563333 |
| Ppm1k         | chr6:57456495-57485420    | 45.3977     | 15.13458    |
| M6pr          | chr6:122259027-122267695  | 45.35553333 | 51.10523333 |
| Scnm1         | chr3:94933640-94937934    | 45.3496     | 21.48726667 |
| Trp53bp2      | chr1:184339297-184392567  | 45.3303     | 41.63223333 |
| Bcl2l14       | chr6:134346346-134388742  | 45.2874     | 21.77873333 |
| Ppig          | chr2:69561144-69592116    | 45.273      | 33.5426     |
| Ccl27a        | chr4:41716342-41721049    | 45.2454     | 31.62596333 |
| Ilkap         | chr1:93272407-93295360    | 45.22193333 | 47.95233333 |
| Usp7          | chr16:8688814-8738435     | 45.21453333 | 39.75016667 |
| Zmat4         | chr8:24780132-25173577    | 45.18486667 | 10.19152667 |
| 1810010H24Rik | chr11:106889536-106891756 | 45.15593333 | 9.482324333 |
| Zfp330        | chr8:85287518-85298025    | 45.13406667 | 33.51826667 |
| 1810035L17Rik | chr12:88784845-88790874   | 45.11003333 | 61.541      |
| Bpnt1         | chr1:187156037-187181648  | 45.09586667 | 59.3039     |
| Gm15421       | chr5:22034038-22034848    | 45.086      | 87.73586667 |
| Tm9sf2        | chr14:122506303-122558825 | 45.07876667 | 45.8977     |
| Chd2          | chr7:80571537-80686632    | 45.07466667 | 34.19846667 |
| Nqo2          | chr13:34056527-34080334   | 45.05873333 | 16.13713333 |
| Camk2n1       | chr4:138011062-138016041  | 45.0565     | 58.55733333 |
| Acin1         | chr14:55260997-55305768   | 45.0564     | 35.59333333 |
| Tmem147       | chr7:31512719-31514553    | 45.0522     | 14.10608667 |
| Ssr4          | chrX:71032366-71036167    | 45.05066667 | 33.5298     |
| Ascc3         | chr10:50312474-50571008   | 45.02226667 | 30.13226667 |
| Dnm1l         | chr16:16312325-16359123   | 45.0104     | 53.06046667 |
| Ube2i         | chr17:25397455-25411255   | 44.99923333 | 54.02443333 |
| Ube2d3        | chr3:135101722-135130142  | 44.96716667 | 36.02323333 |
| Wbp1          | chr6:83069037-83071455    | 44.9529     | 78.43196667 |
| Nfatc3        | chr8:108583502-108654437  | 44.9004     | 43.92096667 |
| Rbm26         | chr14:105513735-105576544 | 44.89153333 | 31.91333333 |
| Prr14         | chr7:134615127-134620272  | 44.86153333 | 58.31806667 |
| Kras          | chr6:145165218-145198751  | 44.82666667 | 36.4358     |
| Pdcd6         | chr13:74440568-74454774   | 44.7859     | 44.19803333 |
| Phf3          | chr1:30859186-30920101    | 44.7621     | 45.43533333 |
| Herc1         | chr9:66198256-66356582    | 44.66833333 | 26.34166667 |
| Txndc17       | chr11:72021055-72023989   | 44.66823333 | 64.70683333 |

|               |                           |             |             |
|---------------|---------------------------|-------------|-------------|
| Ghr           | chr15:3267759-3533230     | 44.652      | 20.4038     |
| Drg1          | chr11:3149924-3166389     | 44.62683333 | 28.9325     |
| Dhx9          | chr1:155302887-155334790  | 44.6163     | 62.67183333 |
| Meis1         | chr11:18780430-18918972   | 44.61496667 | 12.30623333 |
| Zranb2        | chr3:157197360-157211303  | 44.61243333 | 43.0224     |
| Sprr3         | chr3:92260423-92262642    | 44.59356667 | 152.8585667 |
| Pds5a         | chr5:66006498-66089095    | 44.5852     | 41.31896667 |
| Stra13        | chr11:120572254-120575081 | 44.56296667 | 22.64083333 |
| Becn1         | chr11:101149580-101163581 | 44.52353333 | 38.56933333 |
| Arhgap8       | chr15:84550481-84602637   | 44.51986667 | 28.05703333 |
| Plagl2        | chr2:153053504-153067094  | 44.48823333 | 34.76336667 |
| Olfr1416      | chr1:94376257-94377196    | 44.48366667 | 0.256220333 |
| Ubap2         | chr4:41141347-41222168    | 44.48123333 | 37.8471     |
| Acadm         | chr3:153585322-153607396  | 44.4726     | 22.00793333 |
| Tlk1          | chr2:70550464-70663537    | 44.4724     | 52.72543333 |
| Ubr3          | chr2:69735302-69862070    | 44.46413333 | 44.99933333 |
| Baz1b         | chr5:135663192-135721999  | 44.43056667 | 33.87996667 |
| Ap2b1         | chr11:83116198-83218535   | 44.41696667 | 38.53366667 |
| Eppk1         | chr15:75931917-75950625   | 44.4051     | 77.63663333 |
| Wdr1          | chr5:38918051-38952834    | 44.39266667 | 36.1234     |
| Ahnak         | chr19:9063773-9151409     | 44.3756     | 132.1549333 |
| Cnot2         | chr10:115922216-116018567 | 44.33043333 | 36.80773333 |
| Ccdc59        | chr10:105278534-105284566 | 44.32896667 | 25.77656667 |
| Pura          | chr18:36440815-36447898   | 44.26243333 | 38.45056667 |
| Aff4          | chr11:53164268-53235332   | 44.2528     | 44.0858     |
| Yeats4        | chr10:116652196-116661563 | 44.24486667 | 23.80757667 |
| Tas2r136      | chr6:132727196-132728180  | 44.24326667 | 4.444239    |
| Vprbp         | chr9:106724306-106783323  | 44.23643333 | 16.0609     |
| Fam134b       | chr15:25773018-25903442   | 44.19273333 | 43.37346667 |
| Pogz          | chr3:94641488-94687489    | 44.1859     | 46.6593     |
| Scpep1        | chr11:88785333-88816756   | 44.15943333 | 22.33436667 |
| Gorasp2       | chr2:70499565-70529782    | 44.135      | 41.13873333 |
| 0610007C21Rik | chr5:31351012-31356996    | 44.13284    | 26.5659     |
| Atp1b3        | chr9:96233094-96264718    | 44.1073     | 85.67726667 |
| Aebp2         | chr6:140571183-140625939  | 44.1037     | 19.78926667 |
| Nol7          | chr13:43493744-43498227   | 44.09296667 | 43.7851     |
| Vcp           | chr4:42992835-43013379    | 44.09216667 | 52.20446667 |
| Nin           | chr12:71112421-71212912   | 44.0921     | 18.01973333 |
| Tsc22d3       | chrX:137074067-137135061  | 44.05433333 | 107.413     |
| Actr1a        | chr19:46451303-46470225   | 44.01083333 | 41.45193333 |
| Abcf1         | chr17:36093763-36106695   | 44.00266667 | 25.9559     |
| Stk24         | chr14:121685562-121778452 | 43.97826667 | 44.11373333 |
| Rmnd5a        | chr6:71338627-71390631    | 43.96316667 | 48.50446667 |
| Fundc1        | chrX:17133694-17149423    | 43.943      | 42.5638     |
| Snapin        | chr3:90291947-90294935    | 43.93276667 | 41.96076667 |
| Fxr1          | chr3:33919000-33968266    | 43.90833333 | 68.70313333 |
| Nacc1         | chr8:87194377-87211761    | 43.8832     | 38.84883333 |
| Akirin1       | chr4:123412437-123427542  | 43.83776667 | 27.645      |
| Ddb1          | chr19:10680114-10704311   | 43.7922     | 59.34756667 |
| Gab1          | chr8:83288332-83404378    | 43.74913333 | 83.2205     |
| Glt28d2       | chr3:85673767-85691440    | 43.71493333 | 36.98316667 |
| Rars          | chr11:35621882-35648030   | 43.6611     | 44.01083333 |

|               |                           |             |             |
|---------------|---------------------------|-------------|-------------|
| Pdxdc1        | chr16:13834022-13903228   | 43.6507     | 56.87666667 |
| Sumo2         | chr11:115384422-115397544 | 43.59456667 | 40.75723333 |
| Phlda1        | chr10:110943341-110945705 | 43.5669     | 48.60743333 |
| Erlin1        | chr19:44109432-44144275   | 43.5644     | 17.009      |
| 4932418E24Rik | chr2:26127166-26150077    | 43.54883333 | 40.24203333 |
| Ap3b1         | chr13:95128914-95336271   | 43.54626667 | 26.99056667 |
| Eif2s3x       | chrX:91434047-91457990    | 43.49723333 | 48.92196667 |
| Pak2          | chr16:32017948-32079359   | 43.49246667 | 30.9898     |
| Pts           | chr9:50329721-50336746    | 43.4602     | 25.00157333 |
| Stt3b         | chr9:115151699-115219539  | 43.41323333 | 48.89113333 |
| Ndufa13       | chr8:72418080-72426457    | 43.40216667 | 54.44126667 |
| Otub1         | chr19:7272695-7280774     | 43.2927     | 38.51836667 |
| Hpse2         | chr19:42863084-43462845   | 43.2887     | 0.293204    |
| Zfp91         | chr19:12841428-12870613   | 43.24966667 | 46.59833333 |
| Stip1         | chr19:7095185-7114516     | 43.21623333 | 42.2339     |
| Kcnh8         | chr17:52742087-53044544   | 43.20726667 | 20.1571     |
| Map2k7        | chr8:4238739-4247897      | 43.16073333 | 36.21143333 |
| Rsu1          | chr2:12998635-13192905    | 43.13293333 | 86.10426667 |
| Metap1        | chr3:138121923-138152346  | 43.1309     | 23.84803333 |
| Sh3glb2       | chr2:30200328-30214751    | 43.1212     | 74.8566     |
| Mfap1b        | chr2:121287401-121299759  | 43.10046667 | 40.16373333 |
| Pitpna        | chr11:75401609-75442280   | 43.00086667 | 31.83783333 |
| Ndufs4        | chr13:115078002-115178302 | 42.99053333 | 57.8968     |
| Mctp2         | chr7:79222715-79451481    | 42.98256667 | 24.78683333 |
| 4632427E13Rik | chr7:99889215-99889969    | 42.98123333 | 17.34840333 |
| Psmc14        | chr2:61549750-61638433    | 42.95546667 | 52.8        |
| Lsm12         | chr11:102024802-102046570 | 42.94986667 | 43.98593333 |
| Whsc1         | chr5:34185760-34240615    | 42.9095     | 27.27563333 |
| Csk           | chr9:57474452-57492987    | 42.90086667 | 30.5952     |
| Pink1         | chr4:137869324-137882211  | 42.89073333 | 32.77703333 |
| Lef1          | chr3:130813388-130926249  | 42.87426667 | 6.172656667 |
| D930015E06Rik | chr3:83702208-83844083    | 42.85163333 | 41.61813333 |
| Laptm4a       | chr12:8928112-8945547     | 42.83756667 | 66.76313333 |
| Rock1         | chr18:10064398-10181790   | 42.82856667 | 41.4991     |
| Dido1         | chr2:180392668-180444704  | 42.79576667 | 42.7334     |
| Lyg1          | chr1:38003582-38014604    | 42.77533333 | 134.2826967 |
| Arpc1a        | chr5:145844737-145869625  | 42.72983333 | 56.057      |
| R3hdm2        | chr10:126827366-126936440 | 42.72916667 | 50.59793333 |
| Gtf3c2        | chr5:31458378-31482517    | 42.71       | 35.1037     |
| Eps15l1       | chr8:74864895-74945373    | 42.67943333 | 52.14453333 |
| Sema3a        | chr5:13396783-13603485    | 42.64383333 | 3.281176667 |
| Kpna4         | chr3:68876142-68931014    | 42.61686667 | 46.72816667 |
| Rps7          | chr12:29315711-29320818   | 42.61443333 | 64.37673333 |
| Strbp         | chr2:37425387-37502805    | 42.61273333 | 54.02843333 |
| Reps1         | chr10:17775745-17844961   | 42.59966667 | 29.1223     |
| H2afj         | chr6:136756768-136758595  | 42.5918     | 26.20523333 |
| 1110004E09Rik | chr16:90926055-90935094   | 42.56633333 | 43.59903333 |
| 5730494N06Rik | chr2:132065227-132073524  | 42.55953333 | 82.52066667 |
| Cnn3          | chr3:121129458-121161123  | 42.5439     | 32.13553333 |
| Tmtc3         | chr10:99906535-99949981   | 42.5342     | 33.8886     |
| Zfhx2as       | chr14:55691927-55694711   | 42.5318     | 25.43106667 |
| Slpi          | chr2:164179805-164182243  | 42.52806667 | 101.4120667 |

|               |                           |             |             |
|---------------|---------------------------|-------------|-------------|
| Cdc42bpa      | chr1:181891219-182095733  | 42.5103     | 22.9444     |
| Spag7         | chr11:70477270-70482918   | 42.49976667 | 37.26996667 |
| Nt5c          | chr11:115351739-115353128 | 42.49613333 | 39.87486667 |
| Cnot1         | chr8:98243350-98331362    | 42.4895     | 48.8029     |
| Gnl2          | chr4:124707257-124732626  | 42.4736     | 31.31456    |
| Ylpm1         | chr12:86337270-86411465   | 42.467      | 41.3018     |
| Ppl           | chr16:5086383-5132574     | 42.45176667 | 63.11323333 |
| Zmym2         | chr14:57506631-57581416   | 42.43743333 | 60.40406667 |
| Odc1          | chr12:17551678-17558308   | 42.43633333 | 19.73402667 |
| Txndc16       | chr14:45754122-45839069   | 42.40936667 | 18.71353333 |
| Cops7a        | chr6:124908428-124915547  | 42.4086     | 42.5078     |
| Sike1         | chr3:102799662-102807837  | 42.40123333 | 31.1623     |
| 1110001J03Rik | chr6:38484860-38489449    | 42.3888     | 34.49738    |
| Smarca4       | chr9:21420612-21508674    | 42.3365     | 47.8046     |
| Psmc6         | chr14:45949498-45968746   | 42.31656667 | 50.56743333 |
| Arhgef1       | chr7:25688004-25711610    | 42.3095     | 30.55663333 |
| Rpl27         | chr11:101303558-101306910 | 42.2925     | 49.8857     |
| Purb          | chr11:6367601-6376079     | 42.27203333 | 52.11586667 |
| Hist2h2aa2    | chr3:96049503-96049896    | 42.2361     | 20.98406667 |
| Agtppbp1      | chr13:59550895-59658680   | 42.22743333 | 22.23043333 |
| Epc1          | chr18:6435948-6516085     | 42.21543333 | 44.05806667 |
| Yars          | chr4:128867038-128896851  | 42.14976667 | 15.5719     |
| Srrt          | chr5:137736931-137748902  | 42.1459     | 21.55033333 |
| Phb2          | chr6:124662306-124666963  | 42.1373     | 59.26256667 |
| Pphln1        | chr15:93228780-93322343   | 42.10526667 | 34.17376667 |
| Vac14         | chr8:113142537-113244299  | 42.08746667 | 30.31733333 |
| Bglap-rs1     | chr3:88172538-88173642    | 42.07848    | 47.30083333 |
| Vps26a        | chr10:61917590-61949553   | 42.06583333 | 49.39356667 |
| Cxadr         | chr16:78301935-78360030   | 42.04726667 | 39.06566667 |
| Cmtm4         | chr8:106872092-106919707  | 42.02346667 | 23.36183333 |
| Arhgap18      | chr10:26492317-26638454   | 42.0125     | 33.5032     |
| Casp8         | chr1:58852217-58904347    | 41.968      | 37.54846667 |
| Ppp1r15b      | chr1:135027742-135036377  | 41.94866667 | 33.36923333 |
| Btbd7         | chr12:104022857-104116616 | 41.93613333 | 34.2964     |
| Mir719        | chr14:60847642-60847752   | 41.928      | 0           |
| Nbr1          | chr11:101413420-101443265 | 41.90033333 | 48.4978     |
| Trim26        | chr17:36974085-36996325   | 41.84393333 | 31.38096667 |
| Nisch         | chr14:31984113-32020012   | 41.8405     | 51.0087     |
| Prkaca        | chr8:86496876-86520344    | 41.82603333 | 51.9018     |
| Ctsb          | chr14:63741298-63764760   | 41.82426667 | 33.9873     |
| Spg21         | chr9:65308743-65336277    | 41.8164     | 17.2822     |
| Vti1b         | chr12:80257003-80273445   | 41.8132     | 40.16833333 |
| Pbrm1         | chr14:31832323-31934778   | 41.79143333 | 49.87336667 |
| Wnt5a         | chr14:29318658-29338701   | 41.7477     | 3.977836667 |
| Etf1          | chr18:35062438-35091657   | 41.74736667 | 41.34563333 |
| Mtap7         | chr10:19868725-20001396   | 41.7296     | 25.5077     |
| Ccdc55        | chr11:76857793-76891937   | 41.72026667 | 32.4439     |
| Dpp8          | chr9:64880264-64930458    | 41.6905     | 54.51573333 |
| Safb2         | chr17:56702364-56724006   | 41.68706667 | 28.15066667 |
| 4933421O10Rik | chr4:33114113-33118298    | 41.64613333 | 11.27581    |
| Pdcd4         | chr19:53966720-54004351   | 41.62976667 | 73.84563333 |
| Ets2          | chr16:95924013-95942656   | 41.5769     | 30.1957     |

|               |                           |             |             |
|---------------|---------------------------|-------------|-------------|
| Strn3         | chr12:52709527-52792901   | 41.57486667 | 50.20296667 |
| Cas21         | chr4:148178500-148329001  | 41.5621     | 69.60706667 |
| 1810006K21Rik | chr19:10278691-10282314   | 41.55033333 | 189.5567    |
| Pfkfb3        | chr2:11393057-11475556    | 41.54443333 | 31.8997     |
| MacroD2       | chr2:140221165-142215786  | 41.50336667 | 7.791773333 |
| Med15         | chr16:17651313-17723023   | 41.478      | 25.86986667 |
| Srf           | chr17:46683787-46693111   | 41.46753333 | 63.33926667 |
| Rfk           | chr19:17468532-17475839   | 41.45183333 | 30.34973333 |
| Setd2         | chr9:110435100-110521137  | 41.43396667 | 37.4823     |
| Ndufaf2       | chr13:108842782-108948819 | 41.43203333 | 58.8272     |
| Scaf4         | chr16:90229384-90284670   | 41.4089     | 39.74606667 |
| Dpm3          | chr3:89070473-89070999    | 41.40793333 | 25.70637333 |
| Seh1l         | chr18:67934529-67955141   | 41.39726667 | 17.412      |
| Plscr1        | chr9:92145031-92167399    | 41.38176667 | 9.442566667 |
| Scarna3a      | chr1:161270437-161270555  | 41.37766667 | 28.17363333 |
| Eif4g1        | chr16:20672821-20692956   | 41.36923333 | 40.9796     |
| Nudt3         | chr17:27716335-27760397   | 41.28156667 | 30.37316667 |
| Rab5b         | chr10:128114238-128133324 | 41.21393333 | 28.63213333 |
| Ubr5          | chr15:37897082-38008608   | 41.2072     | 45.88223333 |
| Phc1          | chr6:122267748-122287033  | 41.20243333 | 42.7022     |
| Bex1          | chrX:132748510-132750052  | 41.20056667 | 13.31301267 |
| Ptn           | chr6:36665662-36761361    | 41.20006667 | 37.06316667 |
| Hist2h2aa2    | chr3:96043780-96044173    | 41.15053333 | 19.381      |
| Wbp5          | chrX:132779618-132781678  | 41.1273     | 43.92033333 |
| Hbegf         | chr18:36664580-36675459   | 41.0964     | 73.00353333 |
| Chkb          | chr15:89256779-89260358   | 41.05416667 | 31.2539     |
| Uba5          | chr9:103948917-103965451  | 41.05326667 | 21.8639     |
| Ube2r2        | chr4:41083053-41140403    | 41.03863333 | 67.8551     |
| Hmgb1         | chr5:149858803-149864613  | 41.0151     | 26.3629     |
| Zbtb4         | chr11:69579413-69597528   | 40.98793333 | 32.21316667 |
| Pgk1          | chrX:103382462-103399038  | 40.90886667 | 38.80966667 |
| Ube2d2        | chr18:35931212-35966826   | 40.90173333 | 64.30833333 |
| Prcp          | chr7:100023762-100083091  | 40.883      | 58.39706667 |
| Pttg1ip       | chr10:77044511-77061477   | 40.84353333 | 43.3079     |
| Dld           | chr12:32016426-32036302   | 40.8382     | 50.15253333 |
| Pdrg1         | chr2:152834625-152841119  | 40.7841     | 38.8971     |
| Frrs1         | chr3:116562484-116606668  | 40.77956667 | 31.01693333 |
| Arhgef12      | chr9:42771924-42913801    | 40.77763333 | 47.94436667 |
| Ndufa5        | chr6:24468665-24477687    | 40.77236667 | 31.35683333 |
| Zc3h13        | chr14:75684179-75744233   | 40.76296667 | 28.89123333 |
| Fhdc1         | chr3:84246117-84284361    | 40.7599     | 16.4303     |
| Dhx32         | chr7:140912617-140968486  | 40.75073333 | 29.87066667 |
| Raver2        | chr4:100741642-100824975  | 40.68516667 | 4.690436667 |
| Hectd1        | chr12:52844708-52930523   | 40.68103333 | 56.3786     |
| Mme           | chr3:63099793-63186153    | 40.6737     | 12.98286333 |
| Gak           | chr5:108998432-109058758  | 40.67233333 | 31.32803333 |
| Lmtk2         | chr5:144861304-144949073  | 40.66153333 | 29.71053333 |
| Gm11968       | chr11:6072510-6073334     | 40.6506     | 87.1867     |
| Ict1          | chr11:115265079-115272227 | 40.6498     | 42.81928    |
| Capg          | chr6:72494432-72512974    | 40.6333     | 16.09173667 |
| Scn2a1        | chr2:65508501-65605504    | 40.62453333 | 3.289512667 |
| Pmpcb         | chr5:21242977-21262970    | 40.60013333 | 31.7846     |

|               |                           |             |             |
|---------------|---------------------------|-------------|-------------|
| Smap2         | chr4:120640921-120689852  | 40.59986667 | 28.87433333 |
| Usp47         | chr7:119167019-119254900  | 40.59923333 | 40.71326667 |
| Klhdc2        | chr12:70397667-70411674   | 40.58863333 | 33.50086667 |
| Pld2          | chr11:70353665-70371612   | 40.57173333 | 20.26403333 |
| Tjp1          | chr7:72441050-72516130    | 40.53033333 | 24.3574     |
| Slc25a23      | chr17:57183133-57199286   | 40.51636667 | 35.3858     |
| Stx16         | chr2:173902551-173925272  | 40.4931     | 42.1646     |
| Auh           | chr13:52930478-53025046   | 40.48266667 | 68.23833333 |
| Psmc4         | chr7:28826720-28835111    | 40.4366     | 36.8003     |
| Ppp2r5c       | chr12:111685388-111821271 | 40.43506667 | 46.5243     |
| Glyr1         | chr16:5013994-5050003     | 40.4213     | 44.23236667 |
| Pa2g4         | chr10:127994821-128002990 | 40.41883333 | 82.14483333 |
| Dnajc8        | chr4:132091473-132109657  | 40.41176667 | 42.98083333 |
| Spnb1         | chr12:77681474-77811534   | 40.40233333 | 19.06315667 |
| Ndufs8        | chr19:3908869-3912717     | 40.38263333 | 44.54536667 |
| Zdhhc9        | chrX:45525147-45561879    | 40.37446667 | 43.85723333 |
| Tcta          | chr9:108205288-108208282  | 40.35483333 | 12.75293333 |
| Mars          | chr10:126733276-126748842 | 40.33623333 | 19.28014333 |
| G530011O06Rik | chrX:166412974-166416849  | 40.32696667 | 12.64273333 |
| AW555464      | chr12:113960384-113984802 | 40.3152     | 43.42213333 |
| Lrrc59        | chr11:94491137-94506530   | 40.2854     | 35.9865     |
| Id1           | chr2:152562009-152563146  | 40.2831     | 154.3913667 |
| Prdm2         | chr4:142697293-142802612  | 40.27643333 | 46.35856667 |
| Eef1d         | chr15:75725229-75739770   | 40.26046667 | 43.16323333 |
| Nme7          | chr1:166237805-166367427  | 40.25803333 | 40.39793333 |
| Atl3          | chr19:7568529-7613099     | 40.2363     | 49.52923333 |
| Elof1         | chr9:21917432-21918613    | 40.2266     | 35.7884     |
| Ubqln1        | chr13:58277516-58317014   | 40.2038     | 37.7327     |
| Pdia6         | chr12:17273400-17291576   | 40.19903333 | 75.98003333 |
| Orai3         | chr7:134913328-134918664  | 40.16933333 | 11.82506667 |
| Vamp4         | chr1:164500958-164529209  | 40.13146667 | 23.0279     |
| Sec62         | chr3:30691797-30720185    | 40.12826667 | 32.5971     |
| Kdm1a         | chr4:136106447-136158638  | 40.1226     | 65.68743333 |
| Rbm18         | chr2:35971598-35992224    | 40.1044     | 21.71646667 |
| Fam193a       | chr5:34712581-34829107    | 40.0514     | 25.4301     |
| Numa1         | chr7:109118356-109163473  | 40.0335     | 38.87826667 |
| Stap2         | chr17:56136501-56144991   | 40.02853333 | 26.4778     |
| Crct1         | chr3:92818126-92819608    | 40.0062     | 30.83394    |
| Hist2h4       | chr3:96066892-96067240    | 39.96408    | 43.00066667 |
| Sbds          | chr5:130721601-130731332  | 39.95876667 | 21.63836667 |
| 9130024F11Rik | chr1:57028312-57032040    | 39.9494     | 16.7579     |
| Hnrnp2        | chrX:131135824-131141593  | 39.93303333 | 23.5009     |
| Dopey2        | chr16:93712151-93810833   | 39.90236667 | 31.02326667 |
| Dnaja1        | chr4:40669500-40684184    | 39.8814     | 42.11173333 |
| Kif3b         | chr2:153117151-153159125  | 39.85973333 | 34.58653333 |
| Khdrbs1       | chr4:129380412-129419547  | 39.80863333 | 39.24283333 |
| 2310016M24Rik | chr15:99556048-99558567   | 39.79236667 | 19.73669    |
| Larp1         | chr11:57822565-57875534   | 39.7652     | 58.98033333 |
| Bloc1s2       | chr19:44213736-44220936   | 39.7643     | 34.18806667 |
| Pias1         | chr9:62727883-62828686    | 39.74903333 | 28.97056667 |
| Usp22         | chr11:60965282-60988561   | 39.70953333 | 38.73313333 |
| Rbm38         | chr2:172847402-172860232  | 39.7031     | 149.295     |

|               |                           |             |             |
|---------------|---------------------------|-------------|-------------|
| Pspc1         | chr14:57341285-57397153   | 39.6958     | 25.1536     |
| Sec16a        | chr2:26264950-26300736    | 39.65616667 | 37.67693333 |
| Tmem127       | chr2:127073710-127086500  | 39.63876667 | 32.19093333 |
| Tomm6         | chr17:47823593-47825335   | 39.60423333 | 43.76493333 |
| Itfg1         | chr8:88241455-88364848    | 39.59763333 | 57.89433333 |
| Kpnb1         | chr11:97021023-97049206   | 39.56336667 | 59.18213333 |
| Agps          | chr2:75670233-75769407    | 39.56226667 | 34.50683333 |
| Arl6          | chr16:59613146-59639165   | 39.55713333 | 38.91473333 |
| Emp1          | chr6:135312948-135333191  | 39.54103333 | 79.822      |
| Qrich1        | chr9:108419417-108462498  | 39.48893333 | 43.6578     |
| Ncoa1         | chr12:4247361-4484060     | 39.48426667 | 20.4988     |
| Dnajc15       | chr14:78226023-78274724   | 39.46493333 | 46.00893333 |
| Vta1          | chr10:14375138-14425295   | 39.4479     | 30.53333333 |
| Gls           | chr1:52220293-52290076    | 39.4441     | 47.19396667 |
| Gab2          | chr7:104230260-104457461  | 39.44336667 | 30.93703333 |
| Ppp1r3b       | chr8:36438794-36451191    | 39.42923333 | 3.32142     |
| Ppa2          | chr3:132973079-133041033  | 39.4217     | 31.83123    |
| Scp2          | chr4:107716434-107791152  | 39.4153     | 23.55983333 |
| Rbm6          | chr9:107675890-10775150   | 39.3985     | 35.32813333 |
| Atxn2         | chr5:122161617-122264959  | 39.38753333 | 35.27753333 |
| Rab11a        | chr9:64563106-64585563    | 39.36906667 | 51.84326667 |
| Bbs4          | chr9:59169772-59201315    | 39.3295     | 9.1852      |
| Arrdc1        | chr2:24780871-24790801    | 39.31906667 | 56.75193333 |
| Opa3          | chr7:19813737-19832166    | 39.2909     | 21.85226667 |
| C330006A16Rik | chr2:25992326-25996026    | 39.28776667 | 38.5123     |
| Ccng1         | chr11:40562053-40568788   | 39.2775     | 29.32706667 |
| 2010003O02Rik | chr4:40216611-40217254    | 39.264      | 17.6056     |
| Gbf1          | chr19:46227047-46361000   | 39.25356667 | 27.70993333 |
| Dmpk          | chr7:19669197-19679169    | 39.2419     | 82.48166667 |
| Tlr3          | chr8:46481018-46495893    | 39.24093333 | 6.490206667 |
| Zmiz1         | chr14:26278670-26486233   | 39.22843333 | 63.2589     |
| U2af1l4       | chr7:31348358-31350383    | 39.2216     | 25.512      |
| Atxn10        | chr15:85166810-85294266   | 39.1999     | 44.5832     |
| Bag6          | chr17:35272122-35284267   | 39.16276667 | 40.9254     |
| 1110038B12Rik | chr17:35087180-35089416   | 39.14893333 | 57.12863333 |
| Arid5b        | chr10:67558340-67741474   | 39.10936667 | 38.3248     |
| Wapal         | chr14:35487113-35559403   | 39.1092     | 52.66883333 |
| Grn           | chr11:102291635-102298123 | 39.0942     | 58.8881     |
| Smarcc1       | chr9:110034527-110142682  | 39.05046667 | 64.61706667 |
| Zranb1        | chr7:140141304-140175634  | 39.02633333 | 22.00573333 |
| 6330578E17Rik | chr1:37473929-37486948    | 39.02176667 | 52.59646667 |
| Snap23        | chr2:120393406-120426458  | 38.9949     | 43.96826667 |
| Gpkow         | chrX:7274259-7287385      | 38.96046667 | 24.97923333 |
| Smapi1        | chr1:23852465-23929128    | 38.9204     | 21.14836    |
| Luc7l         | chr17:26389854-26422451   | 38.8675     | 43.95873333 |
| Ppt1          | chr4:122513469-122536418  | 38.86353333 | 50.2652     |
| Mrpl48        | chr7:107697630-107756510  | 38.85816667 | 14.14066667 |
| Msh2          | chr17:88071896-88123053   | 38.85003333 | 41.28263333 |
| Cyp2j6        | chr4:96182828-96220342    | 38.8069     | 22.67933333 |
| Scamp1        | chr13:94971387-95055236   | 38.7638     | 54.92073333 |
| Afm           | chr5:90947974-90982570    | 38.76319133 | 1.785373333 |
| Pitpnc1       | chr11:107069205-107332034 | 38.75603333 | 42.9229     |



|               |                           |             |             |
|---------------|---------------------------|-------------|-------------|
| Kdm5b         | chr1:136456754-136529455  | 38.6836     | 54.7106     |
| Gipc2         | chr3:151756804-151828864  | 38.66536667 | 7.429333333 |
| Fbxl3         | chr14:103479455-103498726 | 38.64203333 | 44.1903     |
| Odf2          | chr2:29745239-29787266    | 38.63806667 | 44.08273333 |
| Faim          | chr9:98886791-98902438    | 38.6067     | 29.22213333 |
| Dynlt1c       | chr17:6853664-6860548     | 38.60136667 | 52.65593333 |
| Gm6548        | chr17:79249844-79251884   | 38.59783333 | 51.9314     |
| Klf2          | chr8:74842960-74845553    | 38.58346667 | 16.63349667 |
| Rfx7          | chr9:72380046-72470756    | 38.57983333 | 46.5308     |
| Ift81         | chr5:123000212-123064527  | 38.5344     | 24.78613333 |
| Mocs2         | chr13:115608444-115619628 | 38.50703333 | 53.7356     |
| Mapk1         | chr16:16983474-17047546   | 38.48786667 | 47.5921     |
| 2610016A17Rik | chr19:25745623-25746729   | 38.4877     | 8.190403333 |
| Kdm2a         | chr19:4316146-4397077     | 38.44973333 | 39.14233333 |
| Mir702        | chr5:137467302-137467411  | 38.44       | 0           |
| Nbea          | chr3:55429119-55987623    | 38.40876667 | 33.78356667 |
| Lrrc6         | chr15:66211419-66332472   | 38.4026     | 16.61543333 |
| Mrpl27        | chr11:94515104-94521401   | 38.40013333 | 44.78273333 |
| Rpph1         | chr14:51427121-51427446   | 38.378      | 49.56213333 |
| Arfip1        | chr3:84299985-84386547    | 38.35363333 | 42.8854     |
| Ppfia1        | chr7:151662659-151739634  | 38.34276667 | 37.57416667 |
| Arhgap4       | chrX:71139690-71156637    | 38.3098     | 4.05535     |
| Cmas          | chr6:142705205-142724234  | 38.28926667 | 69.79413333 |
| Hdac9         | chr12:35056361-35213754   | 38.2738     | 0.586974    |
| Dnajc2        | chr5:21263094-21290983    | 38.2661     | 27.99686667 |
| Timm9         | chr12:72224158-72237662   | 38.25016667 | 9.042108667 |
| Mrpl53        | chr6:83059101-83059926    | 38.24936667 | 33.9688     |
| Apbb2         | chr5:66689963-67010056    | 38.2298     | 14.6685     |
| Ifnar2        | chr16:91373027-91405832   | 38.22763333 | 17.52630667 |
| Sepp1         | chr15:3220766-3230508     | 38.2236     | 44.96473333 |
| Coro2b        | chr9:62267298-62384851    | 38.21166667 | 51.11576667 |
| Trim12a       | chr7:111448410-111464009  | 38.1943     | 14.83038333 |
| Esrp2         | chr8:108655082-108660874  | 38.1908     | 53.3377     |
| Upf3a         | chr8:13785614-13798537    | 38.1626     | 21.29337667 |
| Lsm7          | chr10:80315569-80317954   | 38.1437     | 35.55746667 |
| Acyp1         | chr12:86613347-86621385   | 38.14103333 | 40.0999     |
| Lrba          | chr3:86028611-86586616    | 38.09706667 | 36.59176667 |
| Map2k1        | chr9:64033599-64101412    | 38.09046667 | 36.50953333 |
| 1500011K16Rik | chr2:127617113-127618224  | 38.08973333 | 45.0157     |
| Tmem176a      | chr6:48791481-48795363    | 38.02043333 | 80.12866667 |
| Sbno1         | chr5:124818710-124875923  | 38.0003     | 42.3249     |
| Ralbp1        | chr17:66197768-66235095   | 37.98446667 | 42.08263333 |
| Il4ra         | chr7:132695795-132722988  | 37.97726667 | 23.36916667 |
| S100g         | chrX:159399923-159402531  | 37.95423333 | 51.9709     |
| Ckap5         | chr2:91386478-91460822    | 37.88046667 | 32.96103333 |
| Bri3          | chr5:145005305-145025442  | 37.85       | 20.3357     |
| Dyrk1a        | chr16:94791812-94917126   | 37.8487     | 27.9133     |
| Itrip1        | chr19:47969085-47993789   | 37.79766667 | 16.68896667 |
| A730098P11Rik | chr16:24529399-24534558   | 37.78243333 | 45.75893333 |
| Mycbp2        | chr14:103512627-103746017 | 37.77886667 | 37.83103333 |
| Hcfc1         | chrX:71188133-71211654    | 37.77106667 | 37.63136667 |
| R3hdm1        | chr1:129999882-130134312  | 37.7672     | 28.09936667 |

|          |                           |             |             |
|----------|---------------------------|-------------|-------------|
| Hist1h1e | chr13:23712496-23714427   | 37.7587     | 33.1299     |
| Krt75    | chr15:101393773-101404335 | 37.737      | 7.848285567 |
| Mrps16   | chr14:21210452-21212777   | 37.7325     | 10.05604667 |
| Upp2     | chr2:58607595-58643079    | 37.7269     | 0.4404033   |
| Dag1     | chr9:108108288-108166067  | 37.7221     | 72.3216     |
| Mamld1   | chrX:68303430-68407892    | 37.7219     | 15.05644333 |
| Ctsa     | chr2:164658372-164666532  | 37.6982     | 32.1501     |
| Them5    | chr3:94146020-94151274    | 37.67256667 | 135.4136    |
| Rai12    | chr11:69781726-69794737   | 37.65406667 | 40.2695     |
| Kdm3b    | chr18:34936661-34999024   | 37.63753333 | 46.53843333 |
| Gpi1     | chr7:34986345-35015324    | 37.62743333 | 45.47536667 |
| Cdc26    | chr4:62055622-62069657    | 37.624      | 34.22196667 |
| Rnf167   | chr11:70461090-70464916   | 37.6158     | 49.52333333 |
| Trafd1   | chr5:121821733-121835624  | 37.6107     | 31.423      |
| Slc12a7  | chr13:73901144-73954190   | 37.58836667 | 48.71676667 |
| Ubr2     | chr17:47065239-47147481   | 37.56433333 | 38.76126667 |
| Dip2b    | chr15:99869094-100049904  | 37.55636667 | 33.1394     |
| Irf3     | chr7:52253017-52258218    | 37.55303333 | 35.6097     |
| Tas2r103 | chr6:132986180-132987119  | 37.5372     | 0           |
| Slc7a1   | chr5:149138985-149211480  | 37.52526667 | 18.13706667 |
| Kcnj5    | chr9:32122367-32151822    | 37.52103333 | 20.6416     |
| Rock2    | chr12:16901783-16995080   | 37.5027     | 43.15786667 |
| Edil3    | chr13:88961076-89462830   | 37.50103333 | 9.32776     |
| Pdia4    | chr6:47746139-47763511    | 37.4994     | 46.38226667 |
| Trp53    | chr11:69393860-69405375   | 37.4952     | 40.58383333 |
| Atp6v1b2 | chr8:71612634-71637616    | 37.4658     | 56.6686     |
| Slc25a11 | chr11:70457528-70460541   | 37.4572     | 47.10746667 |
| Pdha1    | chrX:156560150-156576268  | 37.36343333 | 29.2808     |
| Zfand6   | chr7:91763563-91827861    | 37.3593     | 30.39416667 |
| Stau1    | chr2:166773641-166821778  | 37.3473     | 27.438      |
| Tab2     | chr10:7625445-7675921     | 37.32893333 | 49.22716667 |
| Ganab    | chr19:8972600-8991155     | 37.32513333 | 51.5252     |
| Cbx1     | chr11:96650449-96669954   | 37.31053333 | 30.48296667 |
| Rps2     | chr17:24857007-24858872   | 37.31023333 | 72.0032     |
| Nop10    | chr2:112102125-112103055  | 37.2949     | 54.61593333 |
| Coq2     | chr5:101083744-101103275  | 37.27963333 | 29.88446667 |
| Dynlt1c  | chr17:6600903-6607786     | 37.2715     | 45.96776667 |
| Asl      | chr5:130487372-130500201  | 37.22266667 | 24.9871     |
| Jag2     | chr12:114146800-114167706 | 37.21726667 | 40.26903333 |
| Ppil2    | chr16:17086648-17111345   | 37.20213333 | 29.93486667 |
| Pten     | chr19:32832066-32900650   | 37.18966667 | 37.0125     |
| Fbxo9    | chr9:77929305-77956860    | 37.1893     | 29.2572     |
| Gm94     | chr18:43936849-43952532   | 37.16596667 | 98.3743     |
| Larp1b   | chr3:40754552-40781715    | 37.1428     | 18.20417    |
| Rbpms    | chr8:34893115-35040313    | 37.12953333 | 8.722403333 |
| Aspscr1  | chr11:120534286-120570760 | 37.12646667 | 27.5514     |
| G6pdx    | chrX:71654824-71674500    | 37.1253     | 60.3473     |
| Pygo1    | chr9:72773456-72793822    | 37.1157     | 34.17266667 |
| Gatad1   | chr5:3639960-3647936      | 37.11403333 | 24.63206667 |
| Zcchc9   | chr13:91936137-91947301   | 37.11386667 | 33.60213333 |
| Ncbp2    | chr16:31948631-31958558   | 37.11173333 | 41.21336667 |
| Zc3h14   | chr12:99985177-100025984  | 37.10173333 | 27.1592     |

|               |                           |             |             |
|---------------|---------------------------|-------------|-------------|
| Calm3         | chr7:17500727-17509381    | 37.09273333 | 23.01720667 |
| Zfp386        | chr12:117285934-117299062 | 37.0776     | 25.97063333 |
| Nae1          | chr8:107034927-107058537  | 37.06923333 | 34.64943333 |
| Sap130        | chr18:31794036-31882715   | 37.06563333 | 28.7651     |
| Irf9          | chr14:56222821-56228867   | 37.0604     | 29.4783     |
| Hes6          | chr1:93308059-93309799    | 37.0588     | 188.3526667 |
| Ruvbl2        | chr7:52677267-52689834    | 37.0498     | 25.40455667 |
| Ndufb2        | chr6:39542581-39549470    | 37.02876667 | 41.01533333 |
| Rab18         | chr18:6765202-6790229     | 37.0286     | 36.9191     |
| Gtpbp2        | chr17:46297980-46306319   | 36.99836667 | 21.2274     |
| Ankrd37       | chr8:47082261-47085204    | 36.9311     | 60.41016667 |
| Arhgap5       | chr12:53617063-53668838   | 36.9265     | 24.50203333 |
| Exosc3        | chr4:45329501-45333475    | 36.92423333 | 15.62333333 |
| Cryba2        | chr1:74936517-74939709    | 36.87756667 | 31.65736667 |
| Nup205        | chr6:35127615-35197598    | 36.87613333 | 8.269483333 |
| Fam160a1      | chr3:85463984-85550131    | 36.8608     | 34.39436667 |
| Park7         | chr4:150271241-150284030  | 36.8443     | 63.71333333 |
| Dpagt1        | chr9:44134927-44141683    | 36.8171     | 11.62982333 |
| Gm608         | chr16:44173509-44227578   | 36.81153333 | 37.0302     |
| Ptpn18        | chr1:34516590-34530624    | 36.8009     | 25.93633333 |
| Taldo1        | chr7:148578058-148588875  | 36.79573333 | 34.42106667 |
| Brd8          | chr18:34758268-34784464   | 36.79286667 | 26.06513333 |
| Dctn4         | chr18:60685874-60718416   | 36.77323333 | 41.58796667 |
| Tmed4         | chr11:6170716-6174840     | 36.75586667 | 38.3945     |
| A930001N09Rik | chr17:26852594-26913571   | 36.73196667 | 25.61066667 |
| Tgfb3         | chr12:87397692-87419991   | 36.7256     | 64.07906667 |
| Strn          | chr17:79053303-79135900   | 36.7253     | 33.69393333 |
| Mknk2         | chr10:80128073-80134721   | 36.7052     | 26.63126667 |
| Krt15         | chr11:99993072-99997263   | 36.70106667 | 184.6412    |
| Zfml          | chr6:83864346-83936865    | 36.69663333 | 43.97003333 |
| Atp6v0c       | chr17:24300832-24306374   | 36.68366667 | 35.3813     |
| Rogdi         | chr16:5008821-5013646     | 36.67503333 | 52.57093333 |
| 9030625A04Rik | chr14:77424007-77436424   | 36.66946667 | 5.740933333 |
| Usp9x         | chrX:12648623-12750453    | 36.63366667 | 56.0496     |
| Klk14         | chr7:50945787-50950905    | 36.61733333 | 41.48156667 |
| Camta2        | chr11:70482964-70501607   | 36.59373333 | 36.30073333 |
| Mta2          | chr19:9016409-9026790     | 36.5864     | 39.5106     |
| Rab24         | chr13:55420583-55423341   | 36.5861     | 52.11783333 |
| Lsmd1         | chr11:69209292-69210173   | 36.58073333 | 66.2283     |
| Eif6          | chr2:155645572-155652661  | 36.578      | 35.06653333 |
| Whsc1l1       | chr8:26712777-26830139    | 36.55636667 | 36.86326667 |
| Bod1          | chr11:31565149-31571862   | 36.5371     | 36.8369     |
| Fyb           | chr15:6529870-6613312     | 36.5253     | 4.350273333 |
| Fkbp3         | chr12:66163418-66174925   | 36.51806667 | 68.6051     |
| Mkl2          | chr16:13256573-13417622   | 36.50033333 | 46.28146667 |
| Bmyc          | chr2:25562398-25563239    | 36.4963     | 51.13103333 |
| Tmsb10        | chr6:72907340-72908742    | 36.47603333 | 40.76713333 |
| Utp11l        | chr4:124356007-124370798  | 36.44443333 | 34.5675     |
| Lyst          | chr13:13682675-13869707   | 36.4288     | 11.01955667 |
| Alkbh6        | chr7:31093771-31099322    | 36.3854     | 42.85926667 |
| Pde4dip       | chr3:97493751-97692630    | 36.38076667 | 16.5603     |
| Stxbp1        | chr2:32643126-32702757    | 36.3784     | 37.23576667 |

|               |                           |             |             |
|---------------|---------------------------|-------------|-------------|
| Golga7        | chr8:24351797-24367552    | 36.37656667 | 34.35736667 |
| Morn2         | chr17:80689551-80696816   | 36.34716667 | 10.98197667 |
| Megf9         | chr4:70092960-70195962    | 36.3389     | 51.15106667 |
| Sesn3         | chr9:14080744-14130578    | 36.33206667 | 33.40203333 |
| Unc50         | chr1:37487016-37495969    | 36.32466667 | 43.46736667 |
| Atxn7l1       | chr12:33832550-33936022   | 36.32096667 | 8.089736667 |
| Fam50a        | chrX:71558371-71565488    | 36.3203     | 15.60125    |
| Syt12         | chr7:97497208-97558949    | 36.31793333 | 8.843273333 |
| Tspyl1        | chr10:34001995-34004691   | 36.2948     | 28.6096     |
| Nf2           | chr11:4665847-4749547     | 36.28613333 | 39.64676667 |
| Rab21         | chr10:114726917-114752647 | 36.2148     | 37.63876667 |
| Psmg4         | chr13:34254845-34270041   | 36.21106667 | 18.17812667 |
| Alg14         | chr3:120994734-121064929  | 36.1913     | 25.09165667 |
| Rps6kb1       | chr11:86312512-86358309   | 36.1884     | 29.59386667 |
| Hist2h3c1     | chr3:96050607-96052432    | 36.15273333 | 16.57989333 |
| Kctd18        | chr1:58011944-58026928    | 36.10483333 | 24.37237333 |
| Rap1a         | chr3:105531199-105604254  | 36.1022     | 29.50192667 |
| Eif2s2        | chr2:154697145-154718642  | 36.09436667 | 38.20336667 |
| Gm6251        | chr10:19928244-19928836   | 36.08346667 | 52.21573333 |
| Ubp1          | chr9:113840051-113886319  | 36.04826667 | 30.22346667 |
| Capn7         | chr14:32149909-32185169   | 36.03703333 | 32.5073     |
| Hist3h2a      | chr11:58768186-58770176   | 36.02916667 | 44.10983333 |
| Gsk3a         | chr7:26013277-26022870    | 36.02656667 | 33.0878     |
| Pacs1         | chr19:5133684-5273119     | 36.01823333 | 45.78433333 |
| Tnrc6c        | chr11:117515602-117624753 | 36.01166667 | 36.77113333 |
| Pdgfa         | chr5:139452928-139470907  | 36.00923333 | 47.25903333 |
| Vps53         | chr11:75859727-75993132   | 35.95413333 | 40.88373333 |
| 2310033P09Rik | chr11:59021862-59024236   | 35.9132     | 16.15451667 |
| Herc3         | chr6:58783693-58870390    | 35.90953333 | 27.43693333 |
| Mkrn1         | chr6:39347819-39370368    | 35.90506667 | 27.76503333 |
| Cdk13         | chr13:17807795-17896931   | 35.89956667 | 22.97753333 |
| Emd           | chrX:71500177-71503086    | 35.89896667 | 44.0332     |
| Gtf2a1        | chr12:92793701-92828927   | 35.8967     | 29.1573     |
| Ttc5          | chr14:51385089-51405193   | 35.87953333 | 22.5337     |
| Serp1b12      | chr1:108831025-108853657  | 35.86653333 | 88.44983333 |
| Rps19-ps3     | chr4:147195885-147196311  | 35.83986667 | 35.7195     |
| Rasl11b       | chr5:74591350-74595502    | 35.80516667 | 24.51782667 |
| Cbfb          | chr8:107694573-107741888  | 35.79476667 | 56.99823333 |
| Eif3l         | chr15:78905652-78924830   | 35.76036667 | 54.4125     |
| Pafah1b2      | chr9:45773393-45792954    | 35.7494     | 52.05146667 |
| 9130011J15Rik | chr8:75089096-75094947    | 35.7427     | 36.22883333 |
| Jph1          | chr1:16985020-17087970    | 35.71513333 | 13.85433333 |
| Mtdh          | chr15:34012473-34072140   | 35.71376667 | 42.16396667 |
| Cic           | chr7:26067197-26079167    | 35.6888     | 25.3897     |
| Nck1          | chr9:100395421-100446472  | 35.68876667 | 25.69619333 |
| Znrf1         | chr8:114060539-114149930  | 35.68186667 | 29.1081     |
| H2-T23        | chr17:36166921-36169646   | 35.67736667 | 31.89186667 |
| Tmbim4        | chr10:119645881-119661953 | 35.6511     | 38.72386667 |
| Acsl3         | chr1:78654399-78704318    | 35.64623333 | 26.45863333 |
| Chordc1       | chr9:18096710-18118444    | 35.64043333 | 31.32493333 |
| Nhp2l1        | chr15:81871774-81878028   | 35.5736     | 41.55106667 |
| Psen1         | chr12:85029512-85076149   | 35.54376667 | 39.23383333 |

|               |                           |             |             |
|---------------|---------------------------|-------------|-------------|
| Zfr           | chr15:12047605-12115205   | 35.5436     | 32.99583333 |
| Fam63b        | chr9:70446820-70504981    | 35.52053333 | 31.31276667 |
| E330033B04Rik | chr15:96098994-96105706   | 35.51723333 | 2.789303333 |
| Serinc1       | chr10:57235581-57252335   | 35.48576667 | 59.6229     |
| Pot1a         | chr6:25693734-25759226    | 35.47723333 | 20.75656667 |
| Rnps1         | chr17:24551619-24562842   | 35.46913333 | 41.12596667 |
| Tgfa          | chr6:86145244-86225443    | 35.4662     | 18.76212    |
| Gadd45b       | chr10:80392835-80394949   | 35.46126667 | 12.06971    |
| Pwwp2a        | chr11:43495499-43536135   | 35.42176667 | 16.8199     |
| Psme4         | chr11:30671774-30780361   | 35.4173     | 36.70476667 |
| Npdc1         | chr2:25258602-25265014    | 35.41013333 | 35.6831     |
| CrelD2        | chr15:88650075-88657111   | 35.40313333 | 59.5489     |
| Atp6v0e2      | chr6:48487567-48491799    | 35.39863333 | 32.4881     |
| Jtb           | chr3:90035518-90039762    | 35.39373333 | 38.64123333 |
| Riok3         | chr18:12287358-12315876   | 35.39373333 | 30.05286667 |
| Mical3        | chr6:120957257-121031627  | 35.3876     | 25.17193333 |
| Ccdc115       | chr1:34493514-34496517    | 35.37986667 | 46.4014     |
| NdrG3         | chr2:156753077-156817847  | 35.37113333 | 36.89996667 |
| Galnt1        | chr18:24363844-24445317   | 35.36813333 | 49.59356667 |
| 2510003E04Rik | chr10:62021217-62041205   | 35.36813333 | 25.04796667 |
| Chmp4b        | chr2:154482761-154520519  | 35.35803333 | 23.5443     |
| 2310004N24Rik | chr11:116060168-116076632 | 35.35036667 | 43.73346667 |
| Sel1l         | chr12:93044482-93087597   | 35.34693333 | 32.88133333 |
| 2810428I15Rik | chr8:73028194-73030638    | 35.34553333 | 27.02016667 |
| Nrcam         | chr12:45429871-45702833   | 35.3377     | 28.76253333 |
| Fbxo11        | chr17:88390198-88464625   | 35.33363333 | 31.25513333 |
| Stxbp2        | chr8:3631159-3643644      | 35.3283     | 35.42866667 |
| Scarb2        | chr5:92872898-92934634    | 35.3204     | 21.30193333 |
| Ctdnep1       | chr11:69794669-69804102   | 35.24246667 | 18.89413333 |
| Taf9          | chr13:101421297-101436368 | 35.23786667 | 56.6075     |
| Cdc25b        | chr2:131012683-131024247  | 35.22146667 | 54.66703333 |
| Blmh          | chr11:76759157-76800891   | 35.22103333 | 35.50613333 |
| Lrrc58        | chr16:37868485-37888943   | 35.2078     | 49.94756667 |
| Il6st         | chr13:113254277-113297068 | 35.1858     | 23.9439     |
| Tanc2         | chr11:105451299-105790617 | 35.16423333 | 47.90883333 |
| Farsb         | chr1:78421410-78485421    | 35.0984     | 25.9112     |
| Sra1          | chr18:36826840-36829965   | 35.07166667 | 35.2859     |
| Stat1         | chr1:52176281-52218709    | 35.06613333 | 22.03708    |
| Tcf12         | chr9:71692058-71959626    | 35.05773333 | 27.3055     |
| Gm5643        | chr15:103070884-103075386 | 35.0548     | 65.7667     |
| Cdk12         | chr11:98064618-98114854   | 35.04063333 | 45.0172     |
| Snx6          | chr12:55847343-55896649   | 35.03756667 | 45.693      |
| Stub1         | chr17:25967580-25970306   | 35.0368     | 37.2984     |
| Ttc25         | chr11:100406945-100433880 | 35.03556667 | 3.21787     |
| Ly6g6d        | chr17:35208292-35211409   | 35.02995333 | 26.46726667 |
| Dclk2         | chr3:86590071-86724806    | 35.02626667 | 28.02936667 |
| Pgd           | chr4:148524093-148540816  | 35.01723333 | 36.402      |
| 1700020I14Rik | chr2:119420031-119426480  | 34.97846667 | 36.66246667 |
| Parp12        | chr6:39036410-39068348    | 34.97583333 | 9.486603333 |
| Ddx50         | chr10:62078770-62113946   | 34.96513333 | 39.61503333 |
| Nucks1        | chr1:133807034-133832898  | 34.95843333 | 39.79286667 |
| Psd3          | chr8:70212980-70498473    | 34.94833333 | 36.10596667 |

|          |                           |             |             |
|----------|---------------------------|-------------|-------------|
| Fut8     | chr12:78339090-78576983   | 34.944      | 12.80272667 |
| Foxn3    | chr12:100433303-100688284 | 34.9349     | 26.6566     |
| Tst      | chr15:78229985-78236289   | 34.93253333 | 69.29726667 |
| Rfx3     | chr19:27836210-28085656   | 34.93226667 | 69.13943333 |
| Rbx1     | chr15:81296745-81306799   | 34.88046667 | 31.94093333 |
| Pcna     | chr2:132075021-132078916  | 34.84213333 | 39.65853333 |
| Nemf     | chr12:70412529-70458163   | 34.82353333 | 39.80033333 |
| Gm20300  | chr10:30323000-30326440   | 34.81086667 | 34.99036667 |
| Thap3    | chr4:151356746-151363095  | 34.7573     | 12.02893333 |
| Vkorc1   | chr7:135036576-135039131  | 34.74853333 | 23.8054     |
| Itgb1    | chr14:124059361-124373301 | 34.74846667 | 4.539136667 |
| Chd9     | chr8:93352733-93578407    | 34.74783333 | 36.85556667 |
| Rnf149   | chr1:39608143-39634192    | 34.72973333 | 38.46423333 |
| Nt5c3    | chr6:56832394-56873926    | 34.72563333 | 17.02156667 |
| Grsf1    | chr5:89088261-89105196    | 34.71586667 | 41.32753333 |
| Mei4     | chr9:81757350-81921098    | 34.69886667 | 4.004076667 |
| Ncstn    | chr1:173996143-174012880  | 34.67626667 | 43.83036667 |
| Rsad2    | chr12:27127607-27141317   | 34.67286667 | 3.833126667 |
| Marcks1  | chr4:129190824-129193225  | 34.64783333 | 41.50406667 |
| Prkci    | chr3:30894692-30951662    | 34.64383333 | 30.1045     |
| Hspa2    | chr12:77505162-77507923   | 34.63106667 | 41.7689     |
| Snx14    | chr9:88271584-88333789    | 34.62973333 | 18.65165333 |
| Lsr      | chr7:31742788-31758488    | 34.60716667 | 36.63123333 |
| B4galt6  | chr18:20843099-20904905   | 34.5982     | 19.0285     |
| Arc4     | chr6:113328106-113340441  | 34.5927     | 43.37216667 |
| Sap18    | chr14:58417025-58423817   | 34.53766667 | 15.78804667 |
| Pnpla2   | chr7:148641086-148646642  | 34.52096667 | 27.2413     |
| Smad4    | chr18:73798666-73863395   | 34.5195     | 32.03576667 |
| Rchy1    | chr5:92377929-92392094    | 34.51116667 | 18.54294    |
| Hn1      | chr11:115358666-115375684 | 34.50443333 | 53.9996     |
| Ptpn3    | chr4:57203712-57314709    | 34.4954     | 25.1706     |
| Slc25a17 | chr15:81149350-81191195   | 34.49506667 | 52.6346     |
| Brp44l   | chr17:8476677-8490526     | 34.4921     | 30.78203333 |
| Hadhb    | chr5:30481861-30511123    | 34.46753333 | 48.93333333 |
| Ccdc53   | chr10:87663841-87708903   | 34.43553333 | 42.9875     |
| H2-Ke6   | chr17:34162977-34165000   | 34.35203333 | 18.098      |
| Gstp1    | chr19:4035410-4037912     | 34.33563333 | 39.99886667 |
| Usp34    | chr11:23206894-23390560   | 34.3337     | 35.8228     |
| Cry1     | chr10:84594444-84647799   | 34.3144     | 11.06111667 |
| Prmt1    | chr7:52232124-52241790    | 34.2811     | 43.08223333 |
| Lnpep    | chr17:17664686-17761453   | 34.25273333 | 40.8846     |
| Ppip5k2  | chr1:99602622-99666669    | 34.24966667 | 20.1507     |
| Cxxc1    | chr18:74375865-74381145   | 34.24233333 | 36.78386667 |
| Cdc73    | chr1:145454628-145549814  | 34.23523333 | 37.86946667 |
| Sos2     | chr12:70684747-70782839   | 34.23033333 | 29.65636667 |
| Tmcc3    | chr10:93977601-94053699   | 34.2167     | 27.22016667 |
| Braf     | chr6:39553236-39675462    | 34.21063333 | 31.89573333 |
| Rbm17    | chr2:11507065-11524826    | 34.19386667 | 30.60296667 |
| Tubb5    | chr17:35970864-35975246   | 34.18336667 | 58.4392     |
| Tollip   | chr7:149067489-149088311  | 34.1667     | 15.11345    |
| Sgpp1    | chr12:76815234-76836716   | 34.15303333 | 57.78233333 |
| Ankrd13a | chr5:115225148-115255829  | 34.14683333 | 26.2136     |

|               |                           |             |             |
|---------------|---------------------------|-------------|-------------|
| Ulk1          | chr5:111213507-111239100  | 34.13793333 | 73.16633333 |
| C2cd2l        | chr9:44117319-44128365    | 34.13746667 | 29.7185     |
| Slc39a6       | chr18:24738381-24762318   | 34.1123     | 52.98426667 |
| Ppp4c         | chr7:133929381-133935985  | 34.1057     | 12.48614667 |
| Ppif          | chr14:26513655-26519952   | 34.10473333 | 59.7288     |
| Usp31         | chr7:128785534-128850767  | 34.0881     | 14.20595333 |
| Med1          | chr11:98013468-98054607   | 34.0741     | 38.84893333 |
| Commd4        | chr9:57002847-57006106    | 34.071      | 45.90476667 |
| Dlst          | chr12:86451782-86475041   | 34.06186667 | 25.71223333 |
| Tsnax         | chr8:127536896-127558092  | 34.04723333 | 36.13776667 |
| Taz           | chrX:71528035-71535490    | 34.03696667 | 25.36898    |
| Ndufs1        | chr1:63190165-63223396    | 34.02396667 | 25.37466667 |
| Srpk2         | chr5:23009173-23122389    | 34.01936667 | 21.5434     |
| Celf1         | chr2:90780553-90859654    | 33.95943333 | 32.77206667 |
| Ezh1          | chr11:101052428-101087764 | 33.94723333 | 13.72773333 |
| Cisd2         | chr3:135069375-135086397  | 33.93866667 | 21.31803333 |
| Cyb561        | chr11:105795017-105805461 | 33.93806667 | 51.11713333 |
| Fkbp8         | chr8:73051641-73059227    | 33.91666667 | 30.19346667 |
| Gpr108        | chr17:57374337-57387064   | 33.90743333 | 52.24616667 |
| Rcc2          | chr4:140257387-140279135  | 33.89496667 | 38.04983333 |
| Cdc37         | chr9:20942984-20954350    | 33.88673333 | 15.51159333 |
| Txn1          | chr18:63822454-63852013   | 33.86783333 | 30.6655     |
| Cmtm8         | chr9:114698462-114753270  | 33.86436667 | 12.85598    |
| Cldn25        | chr16:58728022-58734360   | 33.8506     | 53.96233333 |
| Fytd1         | chr16:32877869-32909049   | 33.84       | 60.04983333 |
| Usp12         | chr5:147546387-147606532  | 33.83086667 | 13.78744333 |
| Phf10         | chr17:15081999-15098237   | 33.8247     | 26.6637     |
| Fam168b       | chr1:34870062-34899895    | 33.82463333 | 40.29573333 |
| Cd74          | chr18:60963502-60972306   | 33.81331    | 40.44177897 |
| Clip1         | chr5:124029078-124134300  | 33.77833333 | 43.87906667 |
| Ssh2          | chr11:77029926-77273721   | 33.75816667 | 80.32793333 |
| Zfp169        | chr13:48583028-48608805   | 33.73856667 | 13.4825     |
| Cgn           | chr3:94563991-94590437    | 33.73796667 | 15.39889333 |
| 2610101N10Rik | chr9:95357312-95412415    | 33.73356667 | 29.1093     |
| Smek1         | chr12:102277618-102321912 | 33.7301     | 28.10413333 |
| Atf2          | chr2:73654578-73730685    | 33.727      | 37.6794     |
| Stk38l        | chr6:146673451-146727336  | 33.71656667 | 26.8208     |
| Hist1h4k      | chr13:21842062-21842374   | 33.70976667 | 6.05167667  |
| Dusp14        | chr11:83861546-83881859   | 33.7054     | 22.1042     |
| Junb          | chr8:87500807-87502647    | 33.6922     | 34.59446667 |
| Mga           | chr2:119722963-119795317  | 33.67453333 | 34.18483333 |
| Tmeff1        | chr4:48598064-48676003    | 33.67306667 | 26.57336667 |
| Ppp3cb        | chr14:21318535-21365795   | 33.6673     | 28.51473333 |
| A830007P12Rik | chr2:25048239-25052333    | 33.6657     | 18.64753333 |
| Rabgap1       | chr2:37298804-37421957    | 33.6656     | 60.13693333 |
| Poldip3       | chr15:82956407-82979766   | 33.6636     | 37.36596667 |
| Efcab4a       | chr7:148646992-148652501  | 33.64316667 | 16.09196    |
| Spata13       | chr14:61253565-61383393   | 33.634      | 4.056392    |
| Amn1          | chr6:149106098-149137234  | 33.62273333 | 18.60823333 |
| Pigq          | chr17:26063368-26078907   | 33.6098     | 23.97613333 |
| Ttc3          | chr16:94592345-94690828   | 33.6001     | 40.8311     |
| Ppp1r2-ps3    | chr19:30613365-30614169   | 33.59653333 | 28.80026667 |

|               |                               |             |             |
|---------------|-------------------------------|-------------|-------------|
| Gbbp11        | chr4:116230331-116266487      | 33.58096667 | 46.93776667 |
| Aimp1         | chr3:132323461-132346843      | 33.57876667 | 42.91293333 |
| Zfp445        | chr9:122758027-122775124      | 33.5757     | 42.4525     |
| Rnpepl1       | chr1:94807401-94817162        | 33.57556667 | 52.69926667 |
| Stat3         | chr11:100748123-100800825     | 33.5578     | 40.49163333 |
| Zmat3         | chr3:32233715-32264587        | 33.53986667 | 34.89276667 |
| Nras          | chr3:102862207-102871837      | 33.5255     | 58.66346667 |
| Rab11b        | chr17:33879428-33897431       | 33.51536667 | 35.0873     |
| Lars          | chr18:42362002-42421725       | 33.503      | 19.66086667 |
| 0610037P05Rik | chr16:14299336-14317425       | 33.50113333 | 43.51493333 |
| Flii          | chr11:60527650-60540723       | 33.49523333 | 30.49306667 |
| Cbl           | chr9:43957344-44042129        | 33.46156667 | 47.19753333 |
| Prkcsb        | chr9:21807478-21818666        | 33.4545     | 23.40296667 |
| Cisd3         | chr11:97547265-97549939       | 33.45146667 | 24.10496667 |
| Pgbd5         | chr8:126892948-126957836      | 33.424      | 31.31026667 |
| Ppp6c         | chr2:39052317-39081858        | 33.4101     | 63.58516667 |
| Nrip1         | chr16:76291106-76373294       | 33.38733333 | 27.57863333 |
| Fbxl16        | chr17:25946029-25958210       | 33.3695     | 13.62911667 |
| Rap2a         | chr14:120877682-120906414     | 33.36226667 | 28.8674     |
|               | 7-Sep chr11:53333237-53357598 | 33.35293333 | 22.53163333 |
| Khsrp         | chr17:57160471-57170930       | 33.346      | 30.09426667 |
| Supt16h       | chr14:52780093-52816914       | 33.34006667 | 39.17343333 |
| Art5          | chr7:109245392-109248743      | 33.30533333 | 1.3338136   |
| Svil          | chr18:5046586-5119291         | 33.28833333 | 41.81186667 |
| Sdf2          | chr11:78059247-78068998       | 33.2774     | 45.46343333 |
| Matr3         | chr18:35721811-35751699       | 33.2672     | 28.88806667 |
| Cldn4         | chr5:135420992-135422804      | 33.21823333 | 58.67513333 |
| Ptov1         | chr7:52118437-52125158        | 33.21023333 | 56.83493333 |
| Nme1          | chr11:93820238-93829835       | 33.19103333 | 35.35493333 |
| Tubb2b        | chr13:34218876-34222223       | 33.18866667 | 47.03113333 |
| D030016E14Rik | chr8:48575481-48618824        | 33.18633333 | 23.26486667 |
| Srebf1        | chr11:60012590-60034106       | 33.1843     | 26.92966667 |
| Lrp10         | chr14:55082983-55089128       | 33.15526667 | 27.58179667 |
| Kctd10        | chr5:114813580-114830514      | 33.1512     | 43.72146667 |
| Tor1aip2      | chr1:157882793-157915989      | 33.12686667 | 52.6306     |
| Eapp          | chr12:55774453-55796852       | 33.1261     | 36.0324     |
| Zmiz2         | chr11:6289366-6306165         | 33.11746667 | 46.77766667 |
| Thrap3        | chr4:125841326-125879954      | 33.11563333 | 31.51993333 |
| Adra1b        | chr11:43588107-43649834       | 33.10726667 | 0.039593667 |
| Trerf1        | chr17:47277890-47496407       | 33.0948     | 19.866      |
| Slc27a2       | chr2:126378759-126413979      | 33.09373333 | 20.77186667 |
| Hiat1         | chr3:116334084-116365595      | 33.08586667 | 44.97486667 |
| Dctn5         | chr7:129276554-129292558      | 33.07716667 | 55.42603333 |
| Tspyl3        | chr2:153048105-153051177      | 33.07616667 | 12.29245667 |
| Smad1         | chr8:81862297-81923367        | 33.06703333 | 25.68673333 |
| Stc2          | chr11:31259440-31270061       | 33.05186667 | 11.73753333 |
| Snrnp48       | chr13:38296807-38319532       | 33.02766667 | 19.0744     |
| Frg1          | chr8:42482807-42502472        | 33.0235     | 21.46073333 |
| Tnpo1         | chr13:99612035-99696339       | 33.02173333 | 29.6265     |
| Ccdc88a       | chr11:29273774-29410811       | 33.01886667 | 35.3759     |
| Supt6h        | chr11:78020250-78059205       | 33.01666667 | 30.91773333 |
| Crk           | chr11:75492811-75519594       | 32.99733333 | 32.99353333 |



|               |                           |             |             |
|---------------|---------------------------|-------------|-------------|
| Anxa11        | chr14:26661640-26706290   | 32.98896667 | 19.72907333 |
| Sec22b        | chr3:97705149-97726241    | 32.97883333 | 35.8715     |
| Api5          | chr2:94251883-94278304    | 32.97426667 | 46.86006667 |
| Med21         | chr6:146591100-146599122  | 32.9439     | 56.14276667 |
| Tcf4          | chr18:69504145-69847621   | 32.9265     | 114.59      |
| Pigp          | chr16:94580369-94592622   | 32.92266667 | 32.72323333 |
| Copb1         | chr7:121359072-121398194  | 32.9213     | 41.29773333 |
| 3110003A17Rik | chr10:17731066-17743058   | 32.90853333 | 21.1527     |
| Exoc4         | chr6:33199149-33922930    | 32.89546667 | 31.6685     |
| Man2a2        | chr7:87493982-87516261    | 32.87553333 | 57.01366667 |
| Cmtm6         | chr9:114640320-114658461  | 32.86553333 | 26.20486667 |
| Ppil4         | chr10:7512691-7542361     | 32.8622     | 28.50886667 |
| Ndrp1         | chr15:66760879-66801203   | 32.8622     | 25.6516     |
| Akr1e1        | chr13:4591735-4608410     | 32.8567     | 20.23061333 |
| Rab11fip4     | chr11:79404713-79507514   | 32.853      | 12.45118667 |
| Ypel5         | chr17:73186043-73200535   | 32.8252     | 31.75176667 |
| Pax9          | chr12:57796625-57812217   | 32.80916667 | 92.51346667 |
| Atl2          | chr17:80247731-80295463   | 32.7943     | 41.46996667 |
| Hagh          | chr17:24987434-25001395   | 32.7927     | 31.00326667 |
| Zc3h15        | chr2:83484734-83504773    | 32.78723333 | 29.35273333 |
| Zfp266        | chr9:20299512-20325863    | 32.7714     | 50.16323333 |
| Ubtf          | chr11:102165873-102180410 | 32.77056667 | 29.60216667 |
| Rybp          | chr6:100178558-100237352  | 32.7678     | 38.0444     |
| Snx9          | chr17:5841379-5930711     | 32.76613333 | 11.41300667 |
| Ceacam2       | chr7:26301060-26325023    | 32.75476667 | 12.0262     |
| Ap2s1         | chr7:17323792-17334639    | 32.75393333 | 37.8921     |
| Cdcp1         | chr9:123081402-123125156  | 32.7317     | 40.95953333 |
| Atp6v1h       | chr1:5073253-5152630      | 32.7276     | 40.433      |
| Snrpe         | chr1:135500447-135506857  | 32.7275     | 62.10056667 |
| Gm1337        | chr2:118524838-118529699  | 32.72673333 | 143.503     |
| Osbpl9        | chr4:108733749-108874877  | 32.71653333 | 16.10023333 |
| Phc2          | chr4:128331945-128430125  | 32.70903333 | 25.7156     |
| Gm20125       | chr10:16670899-16815588   | 32.66576667 | 0.135535667 |
| Snf8          | chr11:95896230-95908719   | 32.6591     | 16.94274    |
| Rnf6          | chr5:147020769-147033033  | 32.6562     | 22.42763333 |
| Ubl5          | chr9:20447761-20451233    | 32.64073333 | 34.01386667 |
| Ubr4          | chr4:138936573-139045447  | 32.60036667 | 33.86186667 |
| Gadd45a       | chr6:66985089-66987401    | 32.60003333 | 40.23026667 |
| Ppp6r3        | chr19:3454927-3575749     | 32.5976     | 45.84563333 |
| lars          | chr13:49777498-49829636   | 32.59743333 | 24.7494     |
| Ppp5c         | chr7:17589989-17613263    | 32.59283333 | 33.5138     |
| Cpped1        | chr16:11803813-11909516   | 32.58006667 | 32.17026667 |
| Med10         | chr13:69948759-69954972   | 32.56733333 | 19.7794     |
| Syn3          | chr10:85511490-85961641   | 32.56693333 | 13.93781    |
| Rpl36a        | chrX:131120192-131122601  | 32.56443333 | 60.3401     |
| Samm50        | chr15:84022662-84044733   | 32.55946667 | 27.55503333 |
| Hipk3         | chr2:104266638-104334646  | 32.5577     | 30.42583333 |
| Kpna6         | chr4:129321222-129350011  | 32.5442     | 35.77893333 |
| Leo1          | chr9:75289330-75314239    | 32.53106667 | 35.04233333 |
| Stox2         | chr8:48265401-48437702    | 32.52113333 | 113.503     |
| Rcor3         | chr1:193924342-193961669  | 32.5055     | 20.1491     |
| Dusp19        | chr2:80457370-80471818    | 32.49223333 | 24.65183333 |

|               |                               |             |             |
|---------------|-------------------------------|-------------|-------------|
| 4930427A07Rik | chr12:114394631-114403669     | 32.49056667 | 15.42066667 |
| Tmem191c      | chr16:17276392-17278754       | 32.481      | 34.18196667 |
| Akt2          | chr7:28376578-28424472        | 32.4804     | 27.4971     |
| Qtrt1         | chr9:21216280-21224723        | 32.44513333 | 13.71578667 |
| Cpt1a         | chr19:3323300-3385733         | 32.42503333 | 45.74796667 |
| Slc6a8        | chrX:70918471-70927839        | 32.4239     | 31.0717     |
| Mgst3         | chr1:169302514-169323928      | 32.41556667 | 42.56283333 |
| Lrrc8d        | chr5:106128987-106244234      | 32.34683333 | 20.9225     |
| Stx7          | chr10:23869122-23908765       | 32.34106667 | 30.4012     |
| Pak4          | chr7:29343837-29383203        | 32.34076667 | 24.9809     |
| Sos1          | chr17:80793091-80879793       | 32.3393     | 22.00713333 |
| Mzt1          | chr14:99433762-99445355       | 32.3314     | 18.32286667 |
|               | 5-Mar chr15:31385653-31460792 | 32.32833333 | 33.8704     |
| Agpat1        | chr17:34742805-34750394       | 32.315      | 33.25113333 |
| Birc6         | chr17:74927634-75103113       | 32.3093     | 35.58166667 |
| Chat          | chr14:33221388-33279095       | 32.30546667 | 0.738948467 |
| Bhlhe40       | chr6:108610622-108616919      | 32.2863     | 21.10523333 |
| 5730469M10Rik | chr14:41807028-41827064       | 32.27413333 | 58.74056667 |
| 9130017N09Rik | chr10:79283765-79293197       | 32.24876667 | 27.09996667 |
| Dnttip2       | chr3:121977331-121988189      | 32.24226667 | 34.49303333 |
| Iscu          | chr5:114222820-114228291      | 32.23126667 | 25.2515     |
| Phip          | chr9:82759765-82869096        | 32.20756667 | 29.2003     |
| Tas2r125      | chr6:132859668-132860604      | 32.18486667 | 0           |
| Pvrl2         | chr7:20301992-20334922        | 32.18216667 | 14.10041333 |
| Rps13         | chr7:123475020-123477704      | 32.1814     | 47.0519     |
| Gnpat         | chr8:127386932-127413957      | 32.1787     | 36.80173333 |
| Ctbp2         | chr7:140178693-140315166      | 32.164      | 17.6004     |
| 2900053A13Rik | chr8:3621550-3624235          | 32.16113333 | 9.40263     |
| Cnksr1        | chr4:133783956-133794314      | 32.16046667 | 19.9295     |
| Nucb1         | chr7:52748043-52765778        | 32.12553333 | 44.5241     |
| Ctdsp1        | chr1:74438182-74443859        | 32.11226667 | 23.84746667 |
| Clec2d        | chr6:129130632-129136553      | 32.08833333 | 18.40106667 |
| Foxj2         | chr6:122770201-122795384      | 32.07436667 | 18.38756667 |
| Rgs13         | chr1:145985796-146024502      | 32.06676667 | 4.137443333 |
| Vps39         | chr2:120142196-120178869      | 32.0634     | 24.3117     |
| Mdm4          | chr1:134886421-134921925      | 32.0505     | 45.66246667 |
| Cib1          | chr7:87372045-87377502        | 32.04683333 | 22.3554     |
| 3110056K07Rik | chr12:72092601-72116810       | 32.03491667 | 5.921423333 |
| Tcea1         | chr1:4847774-4887990          | 32.03083333 | 41.80626667 |
| Ubn2          | chr6:38383924-38462763        | 32.0124     | 33.60376667 |
| Clasp1        | chr1:120285634-120506039      | 32.00426667 | 24.62953333 |
| Itga6         | chr2:71625139-71694815        | 31.97336667 | 29.52596667 |
| Rabgap1l      | chr1:162149304-162723069      | 31.9611     | 23.33876667 |
| Arih1         | chr9:59236360-59334181        | 31.93883333 | 38.47293333 |
| 4930588N13Rik | chr5:150242280-150273195      | 31.92666667 | 3.641513333 |
| Epb4.1l5      | chr1:121441609-121545577      | 31.9036     | 25.84513333 |
| Rgs8          | chr1:155500166-155544795      | 31.89536667 | 52.963      |
| Clic5         | chr17:44325520-44417117       | 31.89246667 | 12.99       |
| Foxo3         | chr10:41905591-41996548       | 31.8915     | 36.20126667 |
| Plekhn1       | chr4:155595564-155602651      | 31.8828     | 30.55603333 |
| Ranbp9        | chr13:43498041-43576342       | 31.87453333 | 57.1009     |
| Krtcap2       | chr3:89050359-89053644        | 31.8505     | 24.43126667 |

|               |                           |             |             |
|---------------|---------------------------|-------------|-------------|
| Dvl1          | chr4:155221520-155233412  | 31.8358     | 137.717     |
| Bmi1          | chr2:18598644-18608256    | 31.8299     | 10.22604333 |
| Serpnb5       | chr1:108757756-108779925  | 31.82543333 | 66.63616667 |
| Phf8          | chrX:147955214-148068400  | 31.81983333 | 24.08273333 |
| Zyx           | chr6:42299826-42308394    | 31.8039     | 54.3168     |
| Brcc3         | chrX:72661966-72701040    | 31.79942333 | 27.76683333 |
| Hnrnp1        | chr7:29595908-29607285    | 31.79863333 | 38.54763333 |
| Ccdc12        | chr9:110559006-110614097  | 31.79136667 | 22.6385     |
| Sel1l3        | chr5:53498321-53604691    | 31.7638     | 21.55757    |
| Plekhb2       | chr1:34906803-34936430    | 31.75653333 | 35.05686667 |
| 2510039O18Rik | chr4:147315003-147321423  | 31.74326667 | 22.5186     |
| Deb1          | chr9:121619506-121622039  | 31.74284333 | 39.19780333 |
| Guk1          | chr11:58997356-59005454   | 31.7413     | 64.03066667 |
| Mrps18c       | chr5:101227777-101233486  | 31.72263333 | 16.96213333 |
| Kdelr2        | chr5:144165498-144182955  | 31.7033     | 51.19363333 |
| Klc1          | chr12:112997059-113044986 | 31.68193333 | 48.97396667 |
| Bcl2l11       | chr2:127951773-127988283  | 31.6801     | 17.05826667 |
| Nrxn1         | chr17:90432983-91492142   | 31.67773333 | 23.6653     |
| Ttc9c         | chr19:8883564-8893784     | 31.6609     | 24.47936667 |
| Ino80d        | chr1:63094374-63160841    | 31.652      | 30.9714     |
| Ppm1d         | chr11:85124755-85160573   | 31.64593333 | 36.02426667 |
| Acaa2         | chr18:74938865-74965861   | 31.6408     | 33.74033333 |
| Kcnq4         | chr4:120370077-120419781  | 31.6334     | 28.6125     |
| Ube3b         | chr5:114830615-114871175  | 31.628      | 22.9821     |
| Crcp          | chr5:130505175-130536653  | 31.61366667 | 23.73663333 |
| Xrcc4         | chr13:89988518-90229213   | 31.6132     | 28.2334     |
| BC031353      | chr9:74800859-74880275    | 31.60923333 | 56.72813333 |
| Ei24          | chr9:36586737-36604978    | 31.6021     | 44.31613333 |
| Stx19         | chr16:62814501-62822548   | 31.57926667 | 11.68242    |
| Prkag2        | chr5:24368552-24606460    | 31.56763333 | 19.26213333 |
| Rdh12         | chr12:80309900-80323648   | 31.5405     | 17.98503333 |
| Fam110c       | chr12:31758832-31764805   | 31.5388     | 14.36534667 |
| B230219D22Rik | chr13:55794484-55804861   | 31.51626667 | 26.801      |
| Stom          | chr2:35169509-35192529    | 31.50433333 | 12.52623667 |
| Egln3         | chr12:55279967-55304861   | 31.50046667 | 84.8848     |
| Mxd1          | chr6:86597038-86619153    | 31.49486667 | 23.50176667 |
| Zfp326        | chr5:106305586-106344837  | 31.47956667 | 39.02606667 |
| Pbx1          | chr1:170049494-170362389  | 31.47086667 | 68.125      |
| Hipk2         | chr6:38647838-38826189    | 31.46373333 | 43.0189     |
| Scd2          | chr19:44368165-44381352   | 31.46336667 | 59.24446667 |
| Skil          | chr3:30993982-31021499    | 31.4626     | 41.80183333 |
| Fdft1         | chr14:63763987-63796630   | 31.4352     | 73.23946667 |
| Tgoln1        | chr6:72558414-72566994    | 31.42373333 | 36.82596667 |
| Srp68         | chr11:116106479-116135531 | 31.4233     | 25.4479     |
| Bmp7          | chr2:172695188-172765794  | 31.4201     | 81.20473333 |
| Tspyl2        | chrX:148771394-148777027  | 31.41966667 | 27.93233333 |
| Srsf10        | chr4:135412006-135425814  | 31.4111     | 38.04803333 |
| Tom1l2        | chr11:60040215-60166407   | 31.41026667 | 29.59596667 |
| Ralgapa2      | chr2:146067034-146337740  | 31.4087     | 5.555083333 |
| Pawr          | chr10:107769244-107851447 | 31.4074     | 17.16       |
| Tubgcp3       | chr8:12614276-12672100    | 31.3794     | 30.22686667 |
| Dynll2        | chr11:87793026-87811800   | 31.36883333 | 39.7366     |

|               |                              |             |             |
|---------------|------------------------------|-------------|-------------|
| Hgsnat        | chr8:27054930-27087216       | 31.36583333 | 22.1068     |
| Ndufs3        | chr2:90734792-90744878       | 31.36373333 | 37.8868     |
| Mcmbp         | chr7:135839972-135883943     | 31.34376667 | 23.81583333 |
|               | 6-Sep chr9:25060039-25116156 | 31.30723333 | 31.99073333 |
| Tas2r114      | chr6:131639151-131640081     | 31.3012     | 0           |
| Arl3          | chr19:46605598-46647575      | 31.29786667 | 25.44338    |
| Sqle          | chr15:59146646-59162748      | 31.28526667 | 49.6486     |
| Tmem167b      | chr3:108359342-108365384     | 31.27946667 | 27.82036667 |
| Adss          | chr1:179693308-179726640     | 31.27246667 | 48.5836     |
| Akap11        | chr14:78892052-78936667      | 31.25083333 | 28.33756667 |
| Samd4b        | chr7:29184540-29221210       | 31.2371     | 35.34653333 |
| Fbxw2         | chr2:34659883-34681755       | 31.22916667 | 27.38206667 |
| Rnf128        | chrX:136097878-136207684     | 31.22733333 | 19.78196667 |
| Sdhb          | chr4:140517185-140535107     | 31.22286667 | 30.90843333 |
| Pax1          | chr2:147190729-147200784     | 31.20726667 | 37.39573333 |
| Rnf114        | chr2:167318144-167341666     | 31.19563333 | 49.50446667 |
| Tspan31       | chr10:126504345-126507317    | 31.1822     | 59.4663     |
| Srpk1         | chr17:28726536-28759399      | 31.15853333 | 59.14306667 |
| Nsun3         | chr16:62734677-62786542      | 31.15386667 | 9.927673333 |
| Smarce1       | chr11:99070361-99092331      | 31.1499     | 21.9445     |
| Cyld          | chr8:91220926-91275844       | 31.14986667 | 19.13016667 |
| Fxyd2         | chr9:45207791-45218361       | 31.11383333 | 5.261563333 |
| Pde2a         | chr7:108570204-108661343     | 31.09973333 | 11.17533667 |
| 0610007N19Rik | chr15:32170322-32174417      | 31.0908     | 3.90935     |
| Gigyf2        | chr1:89223572-89347385       | 31.0888     | 41.38383333 |
| Prkacb        | chr3:146392542-146475910     | 31.0693     | 18.31269    |
| Odz2          | chr11:35820170-36757745      | 31.06166667 | 13.31320667 |
| 1600012H06Rik | chr17:15080188-15082944      | 31.06013333 | 34.51243333 |
| Gosr2         | chr11:103538162-103559024    | 31.05886667 | 49.84066667 |
| Dcaf8         | chr1:174078145-174126524     | 31.05513333 | 26.99813333 |
| Sp3           | chr2:72774489-72818503       | 31.05083333 | 31.84403333 |
| Macf1         | chr4:123026875-123361603     | 31.048      | 38.30506667 |
| Dalrd3        | chr9:108472222-108475102     | 31.04566667 | 18.36343333 |
| 2310009A05Rik | chr9:72887524-72890582       | 31.02696667 | 42.0812     |
| Gbas          | chr5:130230949-130264201     | 31.01866667 | 25.48213333 |
| Slc50a1       | chr3:89072167-89074492       | 31.00806667 | 24.3647     |
| Fuca1         | chr4:135476640-135496215     | 30.9985     | 34.02623333 |
| Kctd3         | chr1:190794976-190831719     | 30.992      | 28.93103333 |
| Casc3         | chr11:98671121-98695121      | 30.9757     | 32.03146667 |
| Rdx           | chr9:51855254-51896843       | 30.97053333 | 38.7211     |
| Ints4         | chr7:104629465-104689908     | 30.96443333 | 34.20863333 |
| Acbd3         | chr1:182656173-182684335     | 30.96183333 | 37.96213333 |
| Usp19         | chr9:108393006-108404668     | 30.92126667 | 31.70633333 |
| Nipa2         | chr7:63186635-63217863       | 30.90796667 | 35.86863333 |
| Rnf34         | chr5:123300196-123318954     | 30.90576667 | 29.19353333 |
| Cse1l         | chr2:166731595-166771889     | 30.90293333 | 37.98676667 |
| Ykt6          | chr11:5855760-5867783        | 30.90263333 | 33.47877667 |
| Pfkip         | chr13:6579119-6647970        | 30.8688     | 5.4076      |
| Ubl4          | chrX:71611056-71613887       | 30.86016667 | 30.0997     |
| 3010026O09Rik | chr11:49988352-50013617      | 30.8538     | 27.67753333 |
| Gnb2          | chr5:137969356-137974457     | 30.84546667 | 31.17073333 |
| Clptm1        | chr7:20216928-20250379       | 30.84416667 | 36.7557     |

|               |                           |             |             |
|---------------|---------------------------|-------------|-------------|
| Ppdpf         | chr2:180922047-180923209  | 30.83333333 | 45.38453333 |
| Pcnp          | chr16:56015620-56029830   | 30.7776     | 34.81836667 |
| Pak1ip1       | chr13:41096378-41108402   | 30.76986667 | 18.63947667 |
| Ing4          | chr6:124989865-124999282  | 30.76833333 | 16.5812     |
| Serpinb3a     | chr1:108942163-108948880  | 30.75613333 | 98.24563333 |
| Nudc          | chr4:133088456-133101942  | 30.74813333 | 39.91146667 |
| Pacsin2       | chr15:83206036-83295036   | 30.7459     | 21.61113333 |
| Insig1        | chr5:28397951-28405202    | 30.73867667 | 58.9821     |
| Snrpd1        | chr18:10617793-10628228   | 30.7226     | 17.93482    |
| Gm5069        | chr1:182257099-182260680  | 30.70526667 | 27.93013333 |
| Lgals3bp      | chr11:118254065-118263245 | 30.70436667 | 34.77866667 |
| Lrp12         | chr15:39702148-39775303   | 30.6986     | 31.61086667 |
| Smek2         | chr11:29072906-29120797   | 30.6895     | 29.11786667 |
| Gba           | chr3:89006849-89012603    | 30.67666667 | 37.21633333 |
| Mapk6         | chr9:75234707-75257821    | 30.63206667 | 50.26433333 |
| Anapc4        | chr5:53225373-53257973    | 30.6164     | 17.12013333 |
| Ptpa          | chr2:130276013-130380036  | 30.61263333 | 15.42454    |
| Uspl1         | chr5:149996135-150027010  | 30.60366667 | 10.43213    |
| Exoc1         | chr5:76958347-76999310    | 30.59756667 | 19.19363333 |
| Mark3         | chr12:112812720-112894438 | 30.5919     | 26.23656667 |
| Psmc3         | chr2:90894172-90899595    | 30.57843333 | 32.01733333 |
| Fam120b       | chr17:15533165-15570545   | 30.57143333 | 20.76553333 |
| Phf12         | chr11:77796317-77844037   | 30.57056667 | 27.02023333 |
| Memo1         | chr17:74600039-74694203   | 30.55556667 | 23.13313333 |
| Rab11fip1     | chr8:28249244-28285118    | 30.55286667 | 37.0252     |
| Sin3a         | chr9:56919846-56976175    | 30.54163333 | 36.68976667 |
| Fam98b        | chr2:117075474-117097276  | 30.52266667 | 38.2779     |
| Tank          | chr2:61416642-61492226    | 30.51483333 | 34.5643     |
| Fh1           | chr1:177531508-177555766  | 30.4994     | 27.49043333 |
| Nmt2          | chr2:3201559-3243641      | 30.4915     | 18.09787    |
| Syncrip       | chr9:88344575-88377235    | 30.4838     | 32.44176667 |
| LOC100504703  | chr10:126507536-126508157 | 30.48135    | 7.54206     |
| Emg1          | chr6:124654387-124662196  | 30.47913333 | 15.92693333 |
| 0910001L09Rik | chr5:138696709-138700623  | 30.46486667 | 60.1077     |
| Slc24a4       | chr12:103367628-103504959 | 30.45146667 | 7.84035     |
| Mrps33        | chr6:39751806-39760935    | 30.43323333 | 57.40043333 |
| Pygb          | chr2:150612531-150657484  | 30.41723333 | 28.82443333 |
| Mob4          | chr1:55188088-55211743    | 30.41466667 | 44.97723333 |
| Taok1         | chr11:77342663-77421317   | 30.40926667 | 36.3406     |
| 2310044G17Rik | chr12:88287992-88306314   | 30.39963333 | 27.07623333 |
| Mrpl20        | chr4:155177726-155182938  | 30.39533333 | 12.81894    |
| Rufy1         | chr11:50202804-50244613   | 30.38826667 | 20.7552     |
| Cog3          | chr14:76102157-76154300   | 30.3828     | 19.16446667 |
| Fkbp2         | chr19:7052228-7054951     | 30.382      | 83.6682     |
| Oxsr1         | chr9:119147550-119231545  | 30.36326667 | 32.05766667 |
| Lonp2         | chr8:89147941-89240535    | 30.35633333 | 40.70986667 |
| R74862        | chr7:150218525-150239273  | 30.3379     | 24.40296667 |
| Wdr74         | chr19:8810328-8815114     | 30.32025333 | 23.07473333 |
| Strap         | chr6:137683602-137700451  | 30.31656667 | 35.04196667 |
| Acadl         | chr1:66877426-66909841    | 30.31276667 | 17.59766667 |
| Psm2          | chr16:20651724-20663487   | 30.30713333 | 28.64886667 |
| Pik3r3        | chr4:115894518-115975661  | 30.30403333 | 51.54313333 |

|               |                           |             |             |
|---------------|---------------------------|-------------|-------------|
| Asph          | chr4:9376231-9596309      | 30.28583333 | 35.2417     |
| Ralgapb       | chr2:158235588-158324989  | 30.27453333 | 29.36016667 |
| Snrpa         | chr7:27972024-27981290    | 30.26693333 | 57.92673333 |
| Mfap1a        | chr2:121318416-121332392  | 30.26693333 | 26.7391     |
| 0610009D07Rik | chr12:4824413-4834465     | 30.24483333 | 18.23469667 |
| 2610507B11Rik | chr11:78075255-78104127   | 30.2041     | 38.00426667 |
| Dram2         | chr3:106350744-106377763  | 30.19593333 | 18.85983333 |
| Jmjd8         | chr17:25965987-25968788   | 30.18463333 | 28.44303333 |
| Actn1         | chr12:81268528-81361358   | 30.179      | 42.86663333 |
| Ilf3          | chr9:21172446-21209805    | 30.17596667 | 27.71136667 |
| Zfhx4         | chr3:5218553-5415855      | 30.17066667 | 2.336056033 |
| Skiv2l2       | chr13:113657987-113717588 | 30.16556667 | 19.10753333 |
| Ppm1a         | chr12:73862197-73895927   | 30.1521     | 30.93466667 |
| Izumo4        | chr10:80165437-80168127   | 30.1405     | 23.1818     |
| Snrnp27       | chr6:86625162-86634485    | 30.13023333 | 42.187      |
| Lass5         | chr15:99566022-99602946   | 30.08143333 | 42.58336667 |
| Chic2         | chr5:75402448-75440651    | 30.06616667 | 13.25408    |
| Rnf19b        | chr4:128735514-128761770  | 30.05333333 | 13.19833333 |
| Smu1          | chr4:40682681-40704918    | 30.0452     | 21.8702     |
| Ralgapa1      | chr12:56703885-56922154   | 30.04363333 | 34.4876     |
| Eif4enif1     | chr11:3102355-3144591     | 30.04203333 | 29.76246667 |
| 4921513D23Rik | chr16:14109258-14159367   | 30.03993333 | 28.18446667 |
| Psme2         | chr14:56206276-56209938   | 30.039      | 18.6319     |
| Tbrg1         | chr9:37456766-37464897    | 30.00186667 | 17.5303     |
| Pmm2          | chr16:8637799-8657617     | 29.9881     | 9.265326667 |
| Gtf2a2        | chr9:69860356-69870654    | 29.98653333 | 43.47746667 |
| Dvl3          | chr16:20517136-20532260   | 29.97526667 | 51.74933333 |
| Ano6          | chr15:95621273-95805903   | 29.97223333 | 10.94439667 |
| Tex9          | chr9:72305861-72339766    | 29.95343333 | 23.13903333 |
| S100pbp       | chr4:128828068-128866726  | 29.94856667 | 8.864246667 |
| Myo6          | chr9:80012840-80159536    | 29.93503333 | 25.99636667 |
| 8430427H17Rik | chr2:153233196-153355707  | 29.93326667 | 21.10893333 |
| Snx7          | chr3:117484414-117571854  | 29.9315     | 16.71480333 |
| Sypl          | chr12:33638809-33664367   | 29.92623333 | 41.9049     |
| Mprrip        | chr11:59475996-59594362   | 29.92543333 | 16.47143333 |
| 1810031K17Rik | chr1:75131788-75138942    | 29.90946667 | 21.275      |
| Sun1          | chr5:139676590-139725793  | 29.90626667 | 32.4564     |
| Tmem208       | chr8:107850263-107852957  | 29.895      | 38.5736     |
| Ptplad1       | chr9:64834789-64869524    | 29.8898     | 38.42136667 |
| Fyco1         | chr9:123698627-123761020  | 29.88533333 | 35.2347     |
| Rsb1l1        | chr5:20398841-20457640    | 29.8804     | 14.36919333 |
| Nipsnap3b     | chr4:53024795-53034931    | 29.87213333 | 19.6118     |
| Fam192a       | chr8:97098840-97125626    | 29.86446667 | 29.26953333 |
| Ranbp1        | chr16:18240071-18248787   | 29.85926667 | 36.7809     |
| Eps8l2        | chr7:148524900-148548915  | 29.85146667 | 71.07333333 |
| Cops2         | chr2:125656039-125684754  | 29.81803333 | 29.0541     |
| Aig1          | chr10:13372514-13588636   | 29.8158     | 31.49363333 |
| Mecp2         | chrX:71272160-71330975    | 29.8119     | 44.40696667 |
| Bbs9          | chr9:22280158-22692724    | 29.80723333 | 18.9674     |
| Aup1          | chr6:83004646-83007676    | 29.79873333 | 19.37973333 |
| Srsf4         | chr4:131429553-131457640  | 29.79296667 | 22.56182667 |
| Wfdc2         | chr2:164388215-164394006  | 29.77590333 | 136.5561333 |

|               |                                |             |             |
|---------------|--------------------------------|-------------|-------------|
| Tmem30a       | chr9:79616747-79641237         | 29.76386667 | 36.67473333 |
| Cdc42bpb      | chr12:112531182-112615929      | 29.76313333 | 21.6242     |
| Skap2         | chr6:51809163-51962548         | 29.76073333 | 33.07003333 |
| Rab5c         | chr11:100576579-100599444      | 29.751      | 21.1391     |
| Bzw1          | chr1:58449979-58463392         | 29.7317     | 63.2594     |
| Snd1          | chr6:28430347-28838832         | 29.71876667 | 16.00803    |
| Zfp292        | chr4:34750358-34830197         | 29.71543333 | 30.48843333 |
| Upf3b         | chrX:34631828-34650317         | 29.70516667 | 24.88883333 |
| Trim28        | chr7:13609500-13616381         | 29.69586667 | 32.85516667 |
| Mapkapk5      | chr5:121975059-121995901       | 29.68686667 | 43.1513     |
| Fam100a       | chr16:4874778-4879851          | 29.68676667 | 22.28073333 |
| Naa35         | chr13:59686693-59736142        | 29.6813     | 41.4419     |
| Gtf2e2        | chr8:34842385-34887645         | 29.67246667 | 31.61643333 |
| Ywhag         | chr5:136384248-136410511       | 29.66866667 | 40.66886667 |
| Prpf38a       | chr4:108237471-108251941       | 29.6304     | 21.2094     |
| Ubn1          | chr16:5050160-5086378          | 29.58923333 | 35.18663333 |
| Smarcd2       | chr11:106124484-106134286      | 29.56276667 | 28.4877     |
| 2410015M20Rik | chr17:56746874-56749194        | 29.5478     | 62.0759     |
| Lrp6          | chr6:134396495-134516931       | 29.5449     | 23.01403333 |
| Stxbp3a       | chr3:108596097-108643420       | 29.5423     | 26.39636667 |
| Wdr47         | chr3:108394195-108448637       | 29.5391     | 15.17473333 |
| Prpf40a       | chr2:52997508-53050221         | 29.53526667 | 32.4583     |
| 2900010M23Rik | chr17:27259609-27270836        | 29.53436667 | 27.63589    |
| Krt10         | chr11:99246568-99250678        | 29.5267     | 16.61703333 |
| Usp36         | chr11:118120966-118151558      | 29.5129     | 23.84673333 |
| Tmem51        | chr4:141586907-141640219       | 29.51096667 | 20.89928667 |
| Errfi1        | chr4:150229199-150242989       | 29.50456667 | 41.53073333 |
| Mff           | chr1:82721492-82748964         | 29.4817     | 40.12403333 |
| Crtc2         | chr3:90058202-90068047         | 29.474      | 20.52096667 |
| Map4k4        | chr1:39957757-40083155         | 29.4739     | 29.86386667 |
| 9930021J03Rik | chr19:29788891-29880499        | 29.44813333 | 36.40496667 |
|               | 7-Mar chr6:116288140-116359558 | 29.43796667 | 31.29886667 |
| Ppp2cb        | chr8:34710092-34730276         | 29.43523333 | 39.93163333 |
| Wasl          | chr6:24563809-24614995         | 29.42916667 | 34.98846667 |
| Dnajb4        | chr3:151846918-151873263       | 29.42336667 | 38.20853333 |
| Med14         | chrX:12252496-12339099         | 29.41136667 | 36.97973333 |
| Pls1          | chr9:95653060-95745698         | 29.40646667 | 17.93693333 |
| Tmem181b-ps   | chr17:6438149-6450142          | 29.40403333 | 45.37316667 |
| Nptn          | chr9:58430046-58500686         | 29.40203333 | 61.6852     |
| Uqcrc1        | chr9:108838660-108851686       | 29.39736667 | 46.7859     |
| Rragc         | chr4:123594675-123614240       | 29.3922     | 32.6817     |
| Copg          | chr6:87837933-87863588         | 29.3605     | 27.9358     |
| Efh2          | chr4:141414056-141430835       | 29.35546667 | 21.83       |
| Sirt2         | chr7:29551770-29573684         | 29.35356667 | 67.62893333 |
| Ssna1         | chr2:25126558-25127938         | 29.3488     | 20.86563333 |
| Trio          | chr15:27660403-27955603        | 29.34426667 | 30.64403333 |
| Mrpl18        | chr17:13104220-13108957        | 29.3416     | 17.26726667 |
| Slc39a9       | chr12:81745201-81784329        | 29.34153333 | 23.60826667 |
| Crip3         | chr17:46565890-46568720        | 29.3301     | 6.1188      |
| Aga           | chr8:54597055-54608776         | 29.32193333 | 32.21393333 |
| Chmp2b        | chr16:65539377-65562942        | 29.31716667 | 24.36866667 |
| Jmj6          | chr11:116698745-116704763      | 29.31636667 | 10.47472667 |

|               |                           |             |             |
|---------------|---------------------------|-------------|-------------|
| Kif3a         | chr11:53380880-53417746   | 29.30376667 | 22.05423333 |
| Prmt2         | chr10:75669966-75700610   | 29.28743333 | 9.263626667 |
| 2510002D24Rik | chr16:18836672-18840206   | 29.2731     | 8.314543333 |
| Clk2          | chr3:88968726-88981009    | 29.2639     | 21.12933333 |
| Meaf6         | chr4:124762390-124787133  | 29.2623     | 38.71103333 |
| Cnot3         | chr7:3596870-3612711      | 29.24573333 | 26.15843333 |
| Gm4861        | chr3:137213008-137215586  | 29.24546667 | 5.660146667 |
| Tpd52l2       | chr2:181231957-181251462  | 29.23936667 | 22.2878     |
| Immt          | chr6:71781313-71825260    | 29.21196667 | 38.54513333 |
| Otud5         | chrX:7418956-7451984      | 29.20936667 | 30.48796667 |
| Zbtb10        | chr3:9250566-9285332      | 29.18946667 | 21.92616667 |
| Mef2a         | chr7:74378716-74517744    | 29.1889     | 33.05933333 |
| Rgnf          | chr13:98668549-98976120   | 29.1717     | 5.44139     |
| Ppm1h         | chr10:122115817-122382849 | 29.15203333 | 12.71462333 |
| Prr15l        | chr11:96790637-96796961   | 29.13353333 | 25.54723333 |
| Fbxw11        | chr11:32542874-32646814   | 29.12806667 | 29.035      |
| Hnrpll        | chr17:80428826-80461674   | 29.12503333 | 30.1442     |
| Scaf8         | chr17:3114971-3198859     | 29.09036667 | 31.31113333 |
| Ly6g6f        | chr17:35217482-35222540   | 29.06803333 | 6.321356667 |
| Rbm27         | chr18:42435006-42501194   | 29.06203333 | 30.33156667 |
| Gtf2h5        | chr17:6079827-6085485     | 29.03186667 | 31.97746667 |
| Llgl2         | chr11:115685371-115717094 | 29.02443333 | 16.3598     |
| Cdc42se1      | chr3:95032701-95040331    | 29.02356667 | 36.86613333 |
| Hpgd          | chr8:58773348-58799843    | 29.0198     | 19.88316067 |
| Rabac1        | chr7:25754768-25757747    | 29.01893333 | 39.4215     |
| Manf          | chr9:106789745-106794269  | 28.9952     | 37.26882333 |
| Zfp809        | chr9:22030146-22047798    | 28.9939     | 22.92279667 |
| Gnpda2        | chr5:69966240-69983524    | 28.9903     | 24.7602     |
| Pank1         | chr19:34885383-34953945   | 28.9894     | 25.8288     |
| Gusb          | chr5:130464890-130478698  | 28.98736667 | 16.85666667 |
| Wsb2          | chr5:117807313-117828598  | 28.95293333 | 30.99616667 |
| Ddx24         | chr12:104646185-104664077 | 28.9074     | 19.91173333 |
| Ythdf3        | chr3:16083182-16117038    | 28.90723333 | 24.5748     |
| Anapc5        | chr5:123237469-123271348  | 28.9059     | 53.75266667 |
| Vps13a        | chr19:16689855-16855423   | 28.90313333 | 25.84776667 |
| Sipa1l3       | chr7:30105396-30290479    | 28.9025     | 28.92356667 |
| Mier3         | chr13:112476385-112508802 | 28.89843333 | 21.22106667 |
| Mrps28        | chr3:8802145-8923857      | 28.89646667 | 31.05563333 |
| Neo1          | chr9:58722486-58884248    | 28.89406667 | 26.70383333 |
| Scarna8       | chr4:86232356-86232474    | 28.89356667 | 0           |
| Cct8          | chr16:87483569-87496114   | 28.88816667 | 43.2269     |
| Slc9a8        | chr2:167247220-167302498  | 28.88606667 | 15.76963333 |
| Dcakd         | chr11:102855369-102878461 | 28.85926667 | 31.83566667 |
| Cnst          | chr1:181476659-181557604  | 28.8567     | 22.60703333 |
| AA465934      | chr11:83105200-83108139   | 28.8476     | 69.21218333 |
| U2af2         | chr7:5013744-5031547      | 28.8261     | 30.02143333 |
| Ddx46         | chr13:55736387-55782617   | 28.82486667 | 26.95786667 |
| Actr8         | chr14:30791522-30806407   | 28.81243333 | 15.14356667 |
| Dlg1          | chr16:31663528-31873442   | 28.80593333 | 28.05986667 |
| 5730419I09Rik | chr6:142959439-143048627  | 28.80146667 | 18.54165333 |
| Rnf220        | chr4:116944068-117169520  | 28.7968     | 20.5316     |
| Prr15         | chr6:54277005-54280194    | 28.7966     | 10.94604333 |



|               |                           |             |             |
|---------------|---------------------------|-------------|-------------|
| Clk3          | chr9:57598517-57613667    | 28.78523333 | 25.81086667 |
| Zhx1          | chr15:57878557-57908044   | 28.77693333 | 26.96303333 |
| Mettl7a1      | chr15:100135247-100144779 | 28.77363333 | 31.3356     |
| Isyna1        | chr8:73118379-73121189    | 28.77286667 | 37.92013333 |
| Tmed10        | chr12:86681563-86715667   | 28.7598     | 33.9457     |
| Cachd1        | chr4:100449283-100676353  | 28.74923333 | 11.37919    |
| Dars          | chr1:130260283-130313993  | 28.7449     | 25.96106667 |
| Akap8         | chr17:32440620-32458098   | 28.7425     | 39.6491     |
| Uba2          | chr7:34925715-34953548    | 28.7285     | 29.3946     |
| Rpl21         | chr5:147644465-147648608  | 28.72686667 | 35.43363333 |
| Myh9          | chr15:77591018-77672545   | 28.7157     | 29.64466667 |
| Nav3          | chr10:109120494-109437275 | 28.70393333 | 0.283769367 |
| Gphn          | chr12:79327641-79785756   | 28.70136667 | 26.00016667 |
| Snora64       | chr17:24857733-24857850   | 28.6947     | 43.43103333 |
| Tmod3         | chr9:75345590-75407464    | 28.69456667 | 29.52416667 |
| D4Erttd22e    | chr4:140668929-140695711  | 28.693      | 17.30312    |
| Ppp2r1b       | chr9:50665039-50702334    | 28.68123333 | 38.5905     |
| Kif1a         | chr1:94912032-94998442    | 28.6786     | 42.0091     |
| Cxcl14        | chr13:56390005-56397912   | 28.67196667 | 7.707383333 |
| Psmb3         | chr11:97564747-97574814   | 28.66143333 | 28.9027     |
| Dusp22        | chr13:30751964-30803094   | 28.64793333 | 45.8488     |
| Gemin7        | chr7:20150297-20158692    | 28.64456667 | 7.786633333 |
| D8Erttd738e   | chr8:86770133-86773660    | 28.64076667 | 65.1582     |
| Minos1        | chr4:138657728-138687028  | 28.6403     | 35.58356667 |
| Snx17         | chr5:31495676-31501273    | 28.6372     | 17.39813333 |
| Rnasel        | chr1:155596555-155611351  | 28.6319     | 3.084461    |
| Pnkf          | chr1:74331607-74400266    | 28.62723333 | 39.22876667 |
| Trmt2b        | chrX:130757493-130811523  | 28.6222     | 21.26336667 |
| Atp2b1        | chr10:98377785-98488777   | 28.6004     | 18.6303     |
| Pja1          | chrX:96661072-96666074    | 28.58646667 | 31.15576667 |
| Osbpl2        | chr2:179854070-179897385  | 28.5864     | 27.8475     |
| Kdm4c         | chr4:73888400-74051768    | 28.56736667 | 17.51676667 |
| Pacs2         | chr12:114252718-114312612 | 28.5606     | 39.588      |
| Sdf4          | chr4:155367022-155387719  | 28.53106667 | 24.75296667 |
| Znhit1        | chr5:137458070-137463752  | 28.5169     | 22.84883667 |
| Gars          | chr6:54987994-55029498    | 28.51586667 | 24.48483333 |
| Uckl1         | chr2:181303858-181316678  | 28.48733333 | 19.12806667 |
| Txnrd1        | chr10:82296695-82360469   | 28.4789     | 37.08653333 |
| Hist1h2bm     | chr13:21813966-21814347   | 28.47123333 | 23.24498    |
| 2210013O21Rik | chrX:150158096-150175839  | 28.46833333 | 43.41156667 |
| AI413582      | chr17:27700713-27702672   | 28.4661     | 33.04603333 |
| B9d1          | chr11:61318673-61326429   | 28.46523333 | 33.7027     |
| Gbe1          | chr16:70314331-70569961   | 28.45506667 | 26.94663333 |
| D230025D16Rik | chr8:107749087-107776951  | 28.4443     | 23.1409     |
| Fam129b       | chr2:32731653-32780773    | 28.42523333 | 38.47806667 |
| Pisd-ps3      | chr11:3024029-3031945     | 28.42216667 | 17.92328133 |
| Bod1l         | chr5:42178777-42235554    | 28.4036     | 21.37256667 |
| Fam54b        | chr4:134081469-134091302  | 28.37686667 | 22.87706667 |
| Rad23a        | chr8:87358550-87364540    | 28.37226667 | 19.37686667 |
| Srp9          | chr1:184054867-184062546  | 28.36506667 | 19.8395     |
| Fndc3a        | chr14:72937759-73109810   | 28.36346667 | 36.65566667 |
| Apoa1bp       | chr3:87860444-87862417    | 28.36103333 | 24.70488667 |

|               |                           |             |             |
|---------------|---------------------------|-------------|-------------|
| Kat5          | chr19:5603013-5610094     | 28.35233333 | 19.0717     |
| 1810009A15Rik | chr19:8963392-8965230     | 28.3395     | 9.767596667 |
| Sik2          | chr9:50700905-50817178    | 28.33096667 | 35.43703333 |
| Peli1         | chr11:20991326-21050330   | 28.30896667 | 36.87546667 |
| Phf6          | chrX:50265442-50310120    | 28.30666667 | 20.2343     |
| Dpf2          | chr19:5897134-5912866     | 28.2995     | 41.18313333 |
| Zfp740        | chr15:102038697-102046032 | 28.2844     | 15.2895     |
| Gtdc1         | chr2:44419941-44717142    | 28.26346667 | 16.65998667 |
| Abca13        | chr11:9091944-9584262     | 28.25434667 | 16.1955     |
| Orc3          | chr4:34514029-34562191    | 28.25106667 | 21.9731     |
| Psma5         | chr3:108059843-108082870  | 28.25046667 | 21.44266667 |
| Irf7          | chr7:148449081-148452323  | 28.24823333 | 4.341893333 |
| Rnf130        | chr11:49838832-49918235   | 28.23973333 | 16.20421    |
| 1700019D03Rik | chr1:52981970-53009684    | 28.228      | 20.24686667 |
| Rraga         | chr4:86221576-86223187    | 28.2247     | 50.8892     |
| Phf5a         | chr15:81694945-81702322   | 28.19213333 | 21.0694     |
| Tars          | chr15:11313417-11329413   | 28.1793     | 14.9771     |
| Uqcrfs1       | chr13:30632180-30637185   | 28.1695     | 47.11946667 |
| Ppp1r2        | chr16:31251626-31275363   | 28.16723333 | 23.65319667 |
| Arcp5l        | chr2:38863658-38871392    | 28.1536     | 40.95936667 |
| Zfp280d       | chr9:72122705-72211578    | 28.15023333 | 47.36703333 |
| Clcc1         | chr3:108456830-108481758  | 28.14953333 | 22.9805     |
| Sec11c        | chr18:65960231-65977311   | 28.14526667 | 30.5893     |
| Rc3h2         | chr2:37225590-37278423    | 28.128      | 19.31953333 |
| Pcyt1b        | chrX:90900201-90995287    | 28.10853333 | 17.96243333 |
| Slc20a1       | chr2:129024508-129037348  | 28.0976     | 19.35032667 |
| Cpsf3         | chr12:21292157-21320917   | 28.0894     | 18.59513333 |
| Gltpd1        | chr4:155238831-155243549  | 28.08223333 | 34.33033333 |
| Gcap14        | chr14:37688121-37781950   | 28.0677     | 20.05296667 |
| Mlec          | chr5:115592989-115608185  | 28.06056667 | 41.04736667 |
| Abhd5         | chr9:122260733-122290641  | 28.0527     | 16.69143333 |
| Vps13c        | chr9:67688202-67843441    | 28.0403     | 18.8829     |
| Rdbp          | chr17:34987335-34993317   | 28.03986667 | 5.802659333 |
| Psmc13        | chr7:148068292-148084541  | 28.0226     | 30.45666667 |
| Polb          | chr8:23738590-23763909    | 28.01976667 | 34.37673333 |
| Fam114a2      | chr11:57296491-57332146   | 28.01336667 | 12.88166    |
| Egln1         | chr8:127432486-127473154  | 27.99346667 | 27.24386667 |
| Ftsjd2        | chr17:29797545-29840304   | 27.97763333 | 17.87836333 |
| Stag2         | chrX:39502588-39630352    | 27.9768     | 28.89473333 |
| 5430417L22Rik | chr2:118571497-118574543  | 27.97243333 | 57.83966667 |
| C030044B11Rik | chr13:49063480-49065274   | 27.96473333 | 31.27382667 |
| BC003965      | chr17:25321505-25324607   | 27.9578     | 16.78941333 |
| Ankrd10       | chr8:11611582-11635754    | 27.94103333 | 28.5302     |
| 2010107H07Rik | chr14:31937690-31942116   | 27.89576667 | 23.54093333 |
| Ext2          | chr2:93535787-93662725    | 27.89251    | 13.15762333 |
| Vasp          | chr7:19842278-19857203    | 27.89076667 | 29.48293333 |
| Mllt6         | chr11:97524725-97546772   | 27.88783333 | 18.61693333 |
| BC013529      | chr10:7487744-7500715     | 27.86633333 | 35.28926667 |
| Crot          | chr5:8966047-8997146      | 27.8644     | 34.99593333 |
| Klhdc10       | chr6:30351908-30405174    | 27.8634     | 18.1868     |
| Cdkl2         | chr5:92435100-92472044    | 27.8586     | 20.77924    |
| Las1l         | chrX:93130651-93152298    | 27.8583     | 22.26964333 |

|               |                           |             |             |
|---------------|---------------------------|-------------|-------------|
| Socs2         | chr10:94874123-94879491   | 27.835      | 27.36916667 |
| Ube2g1        | chr11:72420762-72499983   | 27.82106667 | 31.35876667 |
| Slc12a2       | chr18:58038331-58106475   | 27.80536667 | 22.3366     |
| Ap2m1         | chr16:20535576-20544126   | 27.80126667 | 24.3428     |
| Phactr4       | chr4:131911838-131978361  | 27.80066667 | 29.7728     |
| Camk2b        | chr11:5869668-5965751     | 27.79566667 | 49.13343333 |
| 5730508B09Rik | chr3:127572605-127599241  | 27.79403333 | 16.25823    |
| Ntan1         | chr16:13819369-13835543   | 27.79093333 | 38.40956667 |
| Tshz2         | chr2:169459145-169714004  | 27.789      | 45.34883333 |
| Ube4b         | chr4:148702524-148800740  | 27.76863333 | 30.6711     |
| Tppp          | chr13:74146866-74173201   | 27.7665     | 31.45436667 |
| C80913        | chr7:38745010-38804571    | 27.75773333 | 15.43234333 |
| Dpcd          | chr19:45635104-45652777   | 27.7553     | 10.79605667 |
| Hecw1         | chr13:14318704-14615493   | 27.75106667 | 13.37711667 |
| A730020E08Rik | chr6:61125597-61130804    | 27.73756667 | 0.139108333 |
| Syvn1         | chr19:6046575-6053718     | 27.72559667 | 33.82826667 |
| Usp25         | chr16:77014313-77117025   | 27.72286667 | 45.53813333 |
| Usp48         | chr4:137150103-137214452  | 27.70186667 | 22.61053333 |
| 2610008E11Rik | chr10:78527118-78560345   | 27.69736667 | 18.72503333 |
| Snx25         | chr8:47118614-47209500    | 27.69046667 | 21.764      |
| Chac1         | chr2:119176977-119180062  | 27.6621     | 0.520741267 |
| Mrpl32        | chr13:14702567-14705304   | 27.65176667 | 23.73543333 |
| Akap12        | chr10:5987069-6080212     | 27.64726667 | 13.2567     |
| Ccdc41        | chr10:94151534-94253081   | 27.62673333 | 14.58730333 |
| Exoc6b        | chr6:84568479-85019507    | 27.6194     | 27.76693333 |
| Rpn1          | chr6:88034466-88055298    | 27.614      | 31.60693333 |
| Cep350        | chr1:157692093-157820385  | 27.61326667 | 22.57103333 |
| Eif2ak1       | chr5:144578660-144663586  | 27.59006667 | 29.8352     |
| Sp1           | chr15:102236746-102266835 | 27.5791     | 34.0402     |
| Ap3d1         | chr10:80169722-80204956   | 27.57466667 | 27.24663333 |
| Cnot4         | chr6:34972064-35083737    | 27.57363333 | 34.44376667 |
| D5Erttd579e   | chr5:36943137-37087208    | 27.56666667 | 20.0418     |
| Gabarapl1     | chr6:129483209-129492349  | 27.56243333 | 40.10103333 |
| Rbbp8         | chr18:11791784-11901716   | 27.5561     | 18.8586     |
| Lman2         | chr13:55445193-55464144   | 27.5338     | 43.33703333 |
| Arid4a        | chr12:72116953-72200338   | 27.5291     | 16.74680333 |
| Tcerg1        | chr18:42671140-42735439   | 27.52746667 | 30.0865     |
| Nr1d1         | chr11:98629248-98636556   | 27.52243333 | 32.3807     |
| Pum1          | chr4:130219273-130337479  | 27.50866667 | 35.8886     |
| Tsg101        | chr7:54144396-54175300    | 27.5053     | 15.88916667 |
| Sdc1          | chr12:8778201-8800493     | 27.49276667 | 29.82356667 |
| Cct3          | chr3:88101037-88125689    | 27.48546667 | 28.35356667 |
| Pcgf3         | chr5:108890350-108932118  | 27.4821     | 13.33461333 |
| Lamtor3       | chr3:137581518-137591726  | 27.4734     | 20.7786     |
| Acss1         | chr2:150443846-150493976  | 27.4679     | 5.005973333 |
| Eif3d         | chr15:77789427-77801254   | 27.46153333 | 37.83896667 |
| Eif2a         | chr3:58329742-58361423    | 27.44663333 | 55.41463333 |
| Rps6kb2       | chr19:4156976-4163245     | 27.44193333 | 16.29276667 |
| Ddx42         | chr11:106078239-106110454 | 27.41043333 | 26.22586667 |
| Arhgef5       | chr6:43215642-43239319    | 27.40306667 | 26.24013333 |
| Got1          | chr19:43574242-43599095   | 27.39966667 | 10.93938    |
| Ate1          | chr7:137535007-137663475  | 27.38616667 | 17.0895     |

|               |                           |             |             |
|---------------|---------------------------|-------------|-------------|
| Zfp187        | chr13:21534043-21545596   | 27.3799     | 27.1733     |
| Mapk14        | chr17:28828286-28885350   | 27.36913333 | 34.98216667 |
| Bak1          | chr17:27156756-27165571   | 27.367      | 30.03706667 |
| 1300014I06Rik | chr13:34719709-34744550   | 27.3376     | 45.66463333 |
| Pcdhga10      | chr18:37906841-38001524   | 27.3319     | 6.34359     |
| Unc13b        | chr4:43071855-43277759    | 27.32086667 | 29.40893333 |
| Rcor1         | chr12:112278008-112351597 | 27.26626667 | 30.6237     |
| Sez6l2        | chr7:134094048-134114120  | 27.2567     | 12.3141     |
| Hdac5         | chr11:102057060-102091486 | 27.25583333 | 10.99038    |
| Isca1         | chr13:59856775-59871150   | 27.25436667 | 19.14596667 |
| Gnai3         | chr3:107910216-107949032  | 27.25354    | 45.37323333 |
| Larp7         | chr3:127239631-127256267  | 27.22836667 | 20.08733333 |
| Atp5f1        | chr3:105745780-105763166  | 27.21263333 | 29.3834     |
| Cacybp        | chr1:162132497-162143023  | 27.2123     | 32.93126667 |
| Ostc          | chr3:130398834-130412362  | 27.2101     | 30.03723333 |
| Ufsp2         | chr8:47060892-47082213    | 27.20603333 | 10.69966333 |
| Plcb4         | chr2:135567565-135838804  | 27.1947     | 21.90783333 |
| Hnrnpd        | chr5:100384954-100407957  | 27.18093333 | 22.96016667 |
| Srp72         | chr5:77403725-77428960    | 27.16286667 | 46.83576667 |
| Pcmt1         | chr10:7350033-7383382     | 27.15466667 | 12.06283333 |
| Mgst2         | chr3:51465114-51486597    | 27.14703333 | 31.91656667 |
| Uhmk1         | chr1:172129386-172145524  | 27.1413     | 29.90066667 |
| Atp11b        | chr3:35653059-35755198    | 27.1401     | 32.0358     |
| Suz12         | chr11:79806607-79847625   | 27.13673333 | 33.34403333 |
| Mta3          | chr17:84105502-84214245   | 27.12673333 | 54.6892     |
| Rab3b         | chr4:108551674-108615929  | 27.12286667 | 6.110153333 |
| Ccdc124       | chr8:73392125-73397389    | 27.122      | 33.4405     |
| Tm9sf3        | chr19:41285331-41338494   | 27.1187     | 33.59063333 |
| Med20         | chr17:47748544-47761367   | 27.1099     | 13.7227     |
| Dock7         | chr4:98603355-98787606    | 27.09913333 | 17.76052    |
| Nars2         | chr7:104100036-104213267  | 27.08953333 | 14.9057     |
| Anxa7         | chr14:21274482-21299355   | 27.0873     | 22.2059     |
| Cbx3          | chr6:51420614-51433703    | 27.0794     | 65.96683333 |
| Slc22a23      | chr13:34271026-34437051   | 27.07693333 | 19.30763333 |
| Gtpbp1        | chr15:79521325-79551909   | 27.07296667 | 19.85600667 |
| Hat1          | chr2:71227316-71279679    | 27.07113333 | 29.89886667 |
| Pgm1          | chr5:64484188-64519397    | 27.06736667 | 29.9692     |
| Limd1         | chr9:123387818-123430670  | 27.05436667 | 34.302      |
| Mrpl36        | chr13:73468456-73469626   | 27.0534     | 37.2128     |
| Pfdn1         | chr18:36563332-36614149   | 27.04853333 | 17.72856667 |
| Erlin2        | chr8:28134270-28149907    | 27.04746667 | 32.9518     |
| Rpf1          | chr3:146169309-146184387  | 27.04746667 | 25.43443333 |
| Fbxl14        | chr6:119429685-119433904  | 27.03936667 | 16.56563333 |
| Cyhr1         | chr15:76476196-76490538   | 27.03003333 | 38.22466667 |
| Pstpip2       | chr18:78033288-78121618   | 27.02816667 | 44.4755     |
| Epb4.1l4b     | chr4:57074597-57156028    | 27.01173333 | 46.53676667 |
| Fdx1          | chr9:51751411-51771638    | 26.99706667 | 18.38742667 |
| Ddrgk1        | chr2:130479818-130490381  | 26.99423333 | 24.0973     |
| Tas2r123      | chr6:132797159-132798161  | 26.99283333 | 3.387       |
| Snora34       | chr15:98350147-98350265   | 26.99093333 | 22.2648     |
| 2310021P13Rik | chr14:21526773-21542841   | 26.98856667 | 27.2756     |
| Tesc          | chr5:118477832-118511879  | 26.9881     | 29.13496667 |

|               |                           |             |             |
|---------------|---------------------------|-------------|-------------|
| A330102I10Rik | chr13:29106282-29132205   | 26.98056667 | 15.22116333 |
| Mcf2l         | chr8:12915892-13020509    | 26.97983333 | 33.02413333 |
| Cyth2         | chr7:53062006-53069686    | 26.9744     | 15.65852333 |
| Fam116a       | chr14:27399035-27451585   | 26.97373333 | 27.93843333 |
| Cenpb         | chr2:131003024-131005748  | 26.9734     | 24.3576     |
| Trim24        | chr6:37820810-37916289    | 26.9698     | 12.62761667 |
| 2900097C17Rik | chr2:156213798-156218715  | 26.96636667 | 45.80386667 |
| Stk25         | chr1:95517327-95532304    | 26.94496667 | 26.21903333 |
| Ola1          | chr2:72930857-73052504    | 26.9445     | 65.9064     |
| Usp33         | chr3:152009441-152056578  | 26.93356667 | 33.5821     |
| Atp6v0a1      | chr11:100870765-100925031 | 26.8992     | 36.44013333 |
| Gabpb2        | chr3:94985689-95021864    | 26.88736667 | 19.00488333 |
| Btbd1         | chr7:88936959-88974317    | 26.88296667 | 26.9353     |
| Gnptg         | chr17:25371261-25377061   | 26.87696667 | 59.44316667 |
| Spn           | chr4:141023804-141094512  | 26.87643333 | 22.9845     |
| Rprd1b        | chr2:157854529-157903056  | 26.87053333 | 16.6128     |
| Neur1a        | chr19:47253309-47333931   | 26.86563333 | 22.54666667 |
| Gpr115        | chr17:42793839-42829233   | 26.85476667 | 2.28299     |
| Hdac8         | chrX:99479978-99700487    | 26.84966667 | 9.135813333 |
| Med6          | chr12:82674550-82695945   | 26.8469     | 13.27331    |
| Cpne3         | chr4:19446398-19497251    | 26.83583333 | 27.24186667 |
| Mid1ip1       | chrX:10294490-10296828    | 26.82593333 | 18.08105667 |
| Ddx47         | chr6:134961629-134973794  | 26.82323333 | 42.25703333 |
| Snhg6         | chr1:9932105-9934199      | 26.79586667 | 17.93865333 |
| Nagk          | chr6:83745050-83752550    | 26.7926     | 24.98563333 |
| Dcaf11        | chr14:56178865-56188902   | 26.78046667 | 20.44096667 |
| Gm15800       | chr5:121670227-121818586  | 26.7786     | 21.6768     |
| Fam32a        | chr8:74743628-74747674    | 26.7785     | 46.96353333 |
| Smg1          | chr7:125274825-125387151  | 26.7767     | 25.4225     |
| Micall1       | chr15:78939412-78967331   | 26.75556667 | 27.1852     |
| 1810014F10Rik | chr7:147285368-147288305  | 26.75416667 | 4.678760667 |
| Kdm6b         | chr11:69212019-69227177   | 26.74543333 | 18.75923333 |
| Dsc1          | chr18:20243203-20273274   | 26.7257     | 67.6028     |
| Yipf3         | chr17:46385028-46389486   | 26.7222     | 35.9749     |
| Comt          | chr16:18406974-18426809   | 26.72173333 | 46.1136     |
| Net1          | chr13:3881808-3917466     | 26.7118     | 49.3778     |
| Commd3        | chr2:18594088-18597843    | 26.71136667 | 26.91796667 |
| Tmem111       | chr6:113464880-113481632  | 26.70396667 | 31.24276667 |
| 0610007P22Rik | chr17:25377114-25379744   | 26.68406667 | 32.7917     |
| Gtf2b         | chr3:142428210-142446569  | 26.67346667 | 40.88296667 |
| Nxph4         | chr10:126962528-126971615 | 26.6723     | 16.25586667 |
| Rab1b         | chr19:5099206-5106996     | 26.6682     | 29.34736667 |
| Sft2d2        | chr1:167104471-167124564  | 26.66656667 | 20.6085     |
| Cdc37l1       | chr19:29064983-29092059   | 26.65783333 | 37.00513333 |
| Sphk2         | chr7:52964832-52973372    | 26.64633333 | 12.50624667 |
| Atp11c        | chrX:57476466-57657156    | 26.6166     | 4.59446     |
| Pglyrp1       | chr7:19470038-19475787    | 26.61323333 | 60.03243333 |
| 1810022K09Rik | chr3:14606288-14611256    | 26.6107     | 13.39369    |
| Tmem128       | chr5:38651613-38660857    | 26.59033333 | 14.07778667 |
| Eif3m         | chr2:104839813-104857184  | 26.57886667 | 45.98246667 |
| 9330151L19Rik | chr12:70298197-70300855   | 26.57413333 | 7.20869     |
| Tpp1          | chr7:112893360-112900721  | 26.56453333 | 49.5471     |

|               |                           |             |             |
|---------------|---------------------------|-------------|-------------|
| Sccpdh        | chr1:181598361-181617315  | 26.5537     | 24.30983333 |
| Chmp3         | chr6:71493847-71531568    | 26.55333333 | 17.18759667 |
| Igsf9b        | chr9:27106812-27142348    | 26.5408     | 7.35845     |
| Abcd3         | chr3:121461827-121518133  | 26.54073333 | 37.2853     |
| Ppp2r4        | chr2:30271569-30303327    | 26.53746667 | 20.61424667 |
| Gpx4          | chr10:79516254-79519184   | 26.524      | 16.1831     |
| Dock1         | chr7:141862369-142365330  | 26.51953333 | 15.08504333 |
| Ero1l         | chr14:45902761-45938247   | 26.51333333 | 19.4311     |
| Entpd5        | chr12:85714806-85749979   | 26.5127     | 15.19238    |
| Krt36         | chr11:99963326-99966940   | 26.50683333 | 18.72516667 |
| Grhl2         | chr15:37162790-37293323   | 26.48966667 | 31.69066667 |
| Cflar         | chr1:58770129-58815726    | 26.47793333 | 38.27766667 |
| 1810027O10Rik | chr11:69652026-69653060   | 26.4688     | 62.01393333 |
| Trp53inp1     | chr4:11083587-11101524    | 26.46233333 | 18.28453667 |
| Trim2         | chr3:83965795-84024799    | 26.45493333 | 27.00913333 |
| Gabpa         | chr16:84835368-84864023   | 26.448      | 23.16446667 |
| Gm15987       | chr6:128902370-128925047  | 26.4469     | 1.562791667 |
| Ankrd40       | chr11:94189314-94203161   | 26.43513333 | 21.14096667 |
| Mov10         | chr3:104597749-104621481  | 26.4315     | 16.23003333 |
| Pdzd8         | chr19:59370573-59420270   | 26.4211     | 29.98843333 |
| Capn1         | chr19:5988544-6015825     | 26.4187     | 37.31153333 |
| Klhl21        | chr4:151382999-151391786  | 26.39666667 | 29.36776667 |
| Heg1          | chr16:33684551-33768281   | 26.38636667 | 30.2395     |
| Anxa8         | chr14:34899175-34913754   | 26.38443333 | 66.84893333 |
| Trim39        | chr17:36395817-36408949   | 26.37386667 | 17.21683333 |
| Gm11602       | chr1:63161044-63204869    | 26.36743333 | 9.238503333 |
| Zc3h7a        | chr16:11136686-11176486   | 26.3567     | 49.23116667 |
| Ak3           | chr19:29095321-29122392   | 26.35503333 | 41.02876667 |
| Gmppa         | chr1:75432517-75439751    | 26.34573333 | 26.70466667 |
| Dclre1c       | chr2:3341402-3378389      | 26.3414     | 26.4895     |
| Msn           | chrX:93291383-93363892    | 26.33476667 | 11.70571    |
| Tmem219       | chr7:134029732-134041792  | 26.30156333 | 27.06953667 |
| Ptpn2         | chr18:67825154-67884275   | 26.29586667 | 38.67573333 |
| Stt3a         | chr9:36539997-36575163    | 26.25956667 | 51.13496667 |
| Nfx1          | chr4:40917975-40973025    | 26.2458     | 15.98026667 |
| Rpn2          | chr2:157104833-157152054  | 26.24233333 | 68.1535     |
| Fam13b        | chr18:34602004-34666477   | 26.23846667 | 17.55153333 |
| Ndufv1        | chr19:4007504-4012725     | 26.23653333 | 36.57356667 |
| Sdr39u1       | chr14:56516121-56519069   | 26.22086667 | 27.48983333 |
| Cryzl1        | chr16:91689566-91729047   | 26.2106     | 30.8744     |
| Csnk1g2       | chr10:80085524-80103516   | 26.19693333 | 22.5992     |
| Ctbp1         | chr5:33590371-33617653    | 26.17843333 | 33.0883     |
| Mlh3          | chr12:86575469-86611514   | 26.16873333 | 14.61483    |
| Ank2          | chr3:126624524-126701370  | 26.15313333 | 3.282726667 |
| 9030624J02Rik | chr7:125883784-125985005  | 26.14643333 | 10.45273    |
| Rab11fip3     | chr17:26125980-26206122   | 26.14343333 | 19.61553333 |
| Acox1         | chr11:116033201-116060359 | 26.12456667 | 18.8771     |
| Ptgr2         | chr12:85626245-85656782   | 26.11453333 | 18.26566667 |
| Prpf6         | chr2:181336023-181390366  | 26.10366667 | 13.95606    |
| Fam18b        | chr11:62692991-62708686   | 26.09733333 | 30.06493333 |
| Rusc1         | chr3:88887900-88897285    | 26.0893     | 43.68346667 |
| Gtl3          | chr8:97944149-97958769    | 26.0862     | 17.29672667 |

|               |                           |             |             |
|---------------|---------------------------|-------------|-------------|
| 1500015A07Rik | chr18:61886043-61887907   | 26.07596667 | 6.917953333 |
| lp6k2         | chr9:108698324-108708664  | 26.074      | 19.30773333 |
| ltfg3         | chr17:26349636-26381187   | 26.0554     | 13.63199667 |
| lgbp1         | chrX:97689629-97711464    | 26.0542     | 40.02533333 |
| BC017647      | chr11:77908174-77970841   | 26.054      | 49.26193333 |
| lqck          | chr7:125999288-126116166  | 26.05193333 | 5.79093     |
| Tspan5        | chr3:138405158-138567388  | 26.05123333 | 37.0273     |
| Trappc6a      | chr7:20094077-20101494    | 26.03973333 | 31.34143333 |
| Cyr61         | chr3:145309934-145312949  | 26.0336     | 41.575      |
| Lamb1         | chr12:31950158-32014504   | 26.02463333 | 4.429583333 |
| Igf1r         | chr7:75097142-75378553    | 26.01853333 | 30.93886667 |
| Sec23b        | chr2:144381964-144416489  | 26.01786667 | 24.85123333 |
| Zmym5         | chr14:57409421-57430553   | 26.01513333 | 24.93346667 |
| Atf1          | chr15:100058289-100091679 | 25.98946667 | 33.99363333 |
| Strc          | chr2:121189462-121206676  | 25.97303333 | 16.77582333 |
| Bnip3l        | chr14:67604076-67627714   | 25.9721     | 51.44796667 |
| Mrpl4         | chr9:20807180-20813281    | 25.95776667 | 19.1208     |
| Vps36         | chr8:23303331-23329069    | 25.95773333 | 13.30131    |
| Uqcrb         | chr13:67001556-67006286   | 25.95023333 | 52.09363333 |
| Mrps14        | chr1:162125390-162131317  | 25.93376667 | 25.81223333 |
| Reps2         | chrX:158849885-159081533  | 25.9312     | 22.72466667 |
| Sema5a        | chr15:32174567-32626096   | 25.92613333 | 11.57709    |
| Kpna2         | chr11:106849942-106860839 | 25.92013333 | 34.58523333 |
| Snhg11        | chr2:158201373-158211881  | 25.91833333 | 28.89396667 |
| Rbm7          | chr9:48296801-48303435    | 25.9153     | 12.83093    |
| Rab28         | chr5:42016214-42099394    | 25.90223333 | 19.34773333 |
| Echdc2        | chr4:107838041-107851913  | 25.89696667 | 23.2454     |
| Pigyl         | chr9:21961289-21962798    | 25.8926     | 17.7165     |
| Polr2h        | chr16:20717898-20722338   | 25.88862667 | 11.55548333 |
| Ndel1         | chr11:68634948-68666633   | 25.8756     | 30.2531     |
| Tmpo          | chr10:90610315-90634327   | 25.8729     | 32.1165     |
| Nap1l1        | chr10:110910247-110935206 | 25.8556     | 27.347      |
| Mpzl1         | chr1:167522311-167564672  | 25.85463333 | 43.2894     |
| N28178        | chr4:42930122-42954479    | 25.8491     | 7.04443     |
| Lgals8        | chr13:12531681-12554005   | 25.84876667 | 17.46413333 |
| A930005H10Rik | chr3:115584496-115591048  | 25.8363     | 18.87785333 |
| Foxj3         | chr4:119212292-119301724  | 25.82743333 | 16.1538     |
| Ccnd1         | chr7:152115835-152125830  | 25.8247     | 75.93743333 |
| Mtx2          | chr2:74663868-74714805    | 25.82376667 | 14.40584333 |
| Ccny          | chr18:9314041-9450148     | 25.8109     | 29.23166667 |
| Arpp19        | chr9:74885420-74908120    | 25.81056667 | 41.1228     |
| Phf14         | chr6:11875880-12031198    | 25.80623333 | 30.54086667 |
| Suclg1        | chr6:73198498-73226901    | 25.79086667 | 30.18116667 |
| Ttc19         | chr11:62094974-62129943   | 25.7883     | 18.00706667 |
| Bsdc1         | chr4:129138922-129165676  | 25.78766667 | 33.43063333 |
| Dpm2          | chr2:32426377-32429091    | 25.78502    | 33.60613333 |
| Imp3          | chr9:56785306-56786205    | 25.76696667 | 27.26483333 |
| Parp1         | chr1:182499105-182531385  | 25.75746667 | 32.12043333 |
| Katna1        | chr10:7445797-7482948     | 25.75453333 | 15.04946667 |
| Sbf2          | chr7:117451526-117758434  | 25.7542     | 20.02016667 |
| Fam188a       | chr2:12268890-12341087    | 25.7506     | 19.99823333 |
| Rnf4          | chr5:34679038-34696079    | 25.73603333 | 29.68906667 |

|               |                           |             |             |
|---------------|---------------------------|-------------|-------------|
| Tial1         | chr7:135583290-135605027  | 25.73343333 | 20.05953333 |
| Rassf4        | chr6:116583025-116623854  | 25.72353333 | 25.64806667 |
| Tbc1d19       | chr5:54200865-54295619    | 25.7075     | 18.52596333 |
| Swap70        | chr7:117365216-117427020  | 25.70686667 | 17.2822     |
| Carkd         | chr8:11497505-11513286    | 25.70273333 | 14.56173333 |
| Rsf1          | chr7:104728405-104841292  | 25.70203333 | 26.68146667 |
| Zdhhc20       | chr14:58451538-58509099   | 25.67133333 | 19.51986667 |
| Epb4.1        | chr4:131479340-131631228  | 25.65826667 | 24.87466667 |
| Sec63         | chr10:42481301-42552320   | 25.6574     | 24.35473333 |
| Pcgf2         | chr11:97550136-97561811   | 25.65626667 | 31.2594     |
| Rnf111        | chr9:70273235-70351532    | 25.6556     | 32.1669     |
| Klraq1        | chr17:88929463-88987707   | 25.6525     | 11.7067     |
| Nme3          | chr17:25033444-25034474   | 25.64626667 | 40.1628     |
| Frmd4a        | chr2:4073908-4535089      | 25.62673333 | 17.11495667 |
| Rev3l         | chr10:39451965-39595011   | 25.5959     | 34.17826667 |
| Tbce          | chr13:14090217-14131867   | 25.59386667 | 17.37817667 |
| Ric8          | chr7:148043295-148049630  | 25.58263333 | 30.52516667 |
| Slc25a35      | chr11:68781632-68786017   | 25.5698     | 38.44836667 |
| Ninj1         | chr13:49282915-49291620   | 25.5537     | 37.07003333 |
| Ehmt2         | chr17:35035443-35050992   | 25.55283333 | 18.3216     |
| Otud7b        | chr3:95908449-95965052    | 25.54646667 | 19.53951333 |
| Otud4         | chr8:82163574-82201654    | 25.54026667 | 27.12256667 |
| Grlf1         | chr7:17079821-17200342    | 25.52096667 | 36.5389     |
| Wnk2          | chr13:49131670-49243383   | 25.5206     | 16.5171     |
| 1810058I24Rik | chr6:35202698-35212059    | 25.5182     | 40.79433333 |
| Hadha         | chr5:30444843-30481520    | 25.50393333 | 31.58843333 |
| Trappc2       | chrX:162878756-162890475  | 25.48073    | 7.22038     |
| Ran           | chr5:129526030-129530196  | 25.4782     | 33.65796667 |
| Ccdc58        | chr16:36071745-36092204   | 25.46701    | 14.78214667 |
| Esyf2         | chr12:117519694-117611571 | 25.4607     | 21.57726667 |
| Rasal2        | chr1:159065313-159342726  | 25.45646667 | 20.83616667 |
| Kat2b         | chr17:53706295-53812046   | 25.445      | 14.0572     |
| 6430706D22Rik | chr1:90159687-90165983    | 25.4433     | 7.671505337 |
| Mpdu1         | chr11:69470205-69476144   | 25.42214667 | 31.65226667 |
| Rab5a         | chr17:53618558-53647003   | 25.42163333 | 25.66426667 |
| 2410004B18Rik | chr3:145600995-145607239  | 25.41563333 | 24.2507     |
| Mrps36        | chr13:101505894-101514614 | 25.41143333 | 15.11846667 |
| Nufip2        | chr11:77499640-77531468   | 25.40923333 | 32.33076667 |
| Rapgef1       | chr11:98698098-98714319   | 25.39836667 | 34.05586667 |
| Os9           | chr10:126531314-126558216 | 25.3954     | 33.02453333 |
| Enox2         | chrX:46363698-46641419    | 25.39236667 | 13.44195333 |
| Ccdc97        | chr7:26496135-26504072    | 25.3832     | 14.14160333 |
| Dhx16         | chr17:36016722-36029613   | 25.3601     | 17.59873333 |
| Grhl3         | chr4:135097802-135129535  | 25.35593333 | 39.38396667 |
| Scand1        | chr2:156137581-156138440  | 25.3496     | 14.14143333 |
| Scap          | chr9:110235796-110287450  | 25.34716667 | 21.59286667 |
| Taok3         | chr5:117570137-117725107  | 25.34366667 | 12.44960667 |
| 0610011F06Rik | chr17:26012444-26014108   | 25.3262     | 41.76223333 |
| Exosc1        | chr19:41997469-42007804   | 25.31006667 | 10.50640333 |
| Nr2c2         | chr6:92041411-92123052    | 25.29496667 | 27.1638     |
| Rapgef1       | chr2:29475239-29595883    | 25.29493333 | 22.3606     |
| Gm12409       | chr4:45775248-45777095    | 25.28346667 | 0.257792333 |



|               |                           |             |             |
|---------------|---------------------------|-------------|-------------|
| Arpc1b        | chr5:145875124-145889055  | 25.27806667 | 22.875      |
| Mid1          | chrX:166123178-166428729  | 25.26       | 9.283376667 |
| Slc4a1ap      | chr5:31829367-31856411    | 25.25846667 | 12.39741333 |
| Bik           | chr15:83357291-83375065   | 25.23572667 | 16.56226667 |
| Ankrd52       | chr10:127814179-127831062 | 25.2263     | 23.62953333 |
| Tec           | chr5:73146961-73259687    | 25.22473333 | 18.03563333 |
| Trmt1         | chr8:87213145-87223707    | 25.21986667 | 19.46506667 |
| Csnk2a1       | chr2:152052575-152107587  | 25.21696667 | 23.90986667 |
| Cacna2d2      | chr9:107302210-107431674  | 25.21396667 | 8.78505     |
| Pdcl3         | chr1:39044658-39054081    | 25.1861     | 18.7104     |
| Rgs16         | chr1:155587482-155592598  | 25.17886667 | 263.1286667 |
| Pde9a         | chr17:31523178-31613254   | 25.17046667 | 38.899      |
| Vps4b         | chr1:108667364-108693302  | 25.1682     | 27.92703333 |
| Aggf1         | chr13:96120671-96145289   | 25.15686667 | 22.15266667 |
| Scaper        | chr9:55397689-55785922    | 25.1548     | 23.70566667 |
| St7           | chr6:17699215-17893022    | 25.15156667 | 3.584696    |
| 1700088E04Rik | chr15:78965084-78971681   | 25.14256667 | 35.92416667 |
| Tom1          | chr8:77557584-77594020    | 25.13963333 | 14.08403667 |
| Ppp1cc        | chr5:122608287-122625278  | 25.13936667 | 46.97753333 |
| Pcbd2         | chr13:55828728-55878191   | 25.13362333 | 47.82913333 |
| Abca3         | chr17:24488990-24547146   | 25.11466667 | 44.6795     |
| Gm16515       | chr11:60715747-60727294   | 25.11283333 | 48.6882     |
| 1700025K23Rik | chr10:38838613-38853701   | 25.1062     | 3.212759333 |
| Efha2         | chr8:41393404-41471658    | 25.10436667 | 17.15306667 |
| Gns           | chr10:120802145-120834301 | 25.0936     | 33.22416667 |
| Dtnb          | chr12:3572390-3781398     | 25.0867     | 14.45476667 |
| Slc30a9       | chr5:67698195-67747384    | 25.08316667 | 30.64523333 |
| Hs6st1        | chr1:36125244-36163291    | 25.0813     | 32.10886667 |
| 2700007P21Rik | chr2:106802685-106814554  | 25.07606667 | 10.70099333 |
| Mdc1          | chr17:35978442-35996615   | 25.0731     | 19.03923333 |
| Aars          | chr8:113557866-113580770  | 25.0646     | 13.2737     |
| Herpud1       | chr8:96910399-96919258    | 25.06163333 | 31.54896667 |
| Ilk           | chr7:112885103-112891439  | 25.06023333 | 29.275      |
| Kdm3a         | chr6:71538965-71582899    | 25.055      | 25.79016667 |
| Ccz1          | chr5:144748777-144775722  | 25.0511     | 18.55143333 |
| Wdr13         | chrX:7700426-7709984      | 25.04883333 | 28.23048333 |
| Gnl3l         | chrX:147417675-147451865  | 25.04133333 | 31.5685     |
| Smad5         | chr13:56804370-56843739   | 25.03596667 | 15.18993333 |
| Trim25        | chr11:88860716-88881607   | 25.03373333 | 15.08718    |
| Opa1          | chr16:29579419-29654688   | 25.0315     | 14.60693333 |
| Naa10         | chrX:71162208-71167283    | 25.02798667 | 14.06752    |
| Angel2        | chr1:192748986-192770370  | 25.02696667 | 15.19067    |
| 9030617O03Rik | chr12:102017332-102110820 | 25.02485    | 12.83900333 |
| Ndufa12       | chr10:93661753-93683693   | 25.0233     | 29.82236667 |
| Eif1a         | chr18:46757357-46769879   | 25.02306667 | 38.76133333 |
| Agpat9        | chr5:101275247-101328121  | 25.01486667 | 5.692573333 |
| Fem1b         | chr9:62639635-62659455    | 25.00593333 | 37.01876667 |
| Myadm         | chr7:3289038-3299350      | 25.00476667 | 38.7092     |
| Pi4ka         | chr16:17280443-17406407   | 24.9965     | 20.11606667 |
| Arid4b        | chr13:14156058-14291870   | 24.98816667 | 29.18703333 |
| Cdc16         | chr8:13757689-13781882    | 24.97716667 | 19.76186667 |
| Naprt1        | chr15:75721393-75724911   | 24.96993333 | 15.66290667 |

|               |                           |             |             |
|---------------|---------------------------|-------------|-------------|
| Slc7a7        | chr14:54989125-55036539   | 24.96411    | 20.21788667 |
| Klc2          | chr19:5107745-5118408     | 24.9632     | 9.34507     |
| Rbm22         | chr18:60720439-60732383   | 24.9629     | 11.01072667 |
| Pdk2          | chr11:94887571-94902685   | 24.96063333 | 20.62377333 |
| 1110059E24Rik | chr19:21671802-21727281   | 24.9446     | 17.5051     |
| Arrdc3        | chr13:81022682-81035303   | 24.938      | 35.84216667 |
| Bai2          | chr4:129662321-129699877  | 24.92573333 | 7.93718     |
| Sgpp2         | chr1:78306920-78416861    | 24.9163     | 12.1856     |
| Oxa1l         | chr14:54980524-54989353   | 24.90216667 | 13.13702667 |
| Tcf7l1        | chr6:72576373-72738950    | 24.88363333 | 24.5246     |
| Usp6nl        | chr2:6243802-6364866      | 24.87186667 | 24.79846667 |
| Eea1          | chr10:95403296-95508152   | 24.86766667 | 22.6329     |
| Plbd1         | chr6:136560591-136610414  | 24.85486667 | 51.2455     |
| Cep63         | chr9:102488907-102528454  | 24.84796667 | 22.31173333 |
| Ptpre         | chr7:142729506-142877977  | 24.8288     | 18.18445333 |
| Gpt2          | chr8:88016515-88051457    | 24.81396667 | 31.3056     |
| Cldn8         | chr16:88561070-88563428   | 24.81296667 | 5.582413333 |
| Mrpl50        | chr4:49525468-49533955    | 24.81093333 | 18.44036667 |
| Fam195b       | chr11:120404201-120411041 | 24.79973333 | 32.5123     |
| Asxl2         | chr12:3426856-3506849     | 24.7811     | 30.14196667 |
| Leprel2       | chr6:124791112-124807705  | 24.77966667 | 23.80154667 |
| Gm561         | chr2:144419800-144421101  | 24.77083333 | 18.43987333 |
| Bbip1         | chr19:54004148-54019117   | 24.76746667 | 19.56213333 |
| Stmn1         | chr4:134024234-134029758  | 24.76143333 | 93.1523     |
| Gprc5b        | chr7:126115553-126138725  | 24.75796667 | 26.84096667 |
| Gpr111        | chr17:42845885-42879128   | 24.75323333 | 3.931546667 |
| 2410003K15Rik | chr6:49023793-49034716    | 24.75276667 | 9.979463333 |
| Pccb          | chr9:100882456-100935294  | 24.74661333 | 21.46106667 |
| Lca5          | chr9:83284961-83334734    | 24.74456667 | 23.05733333 |
| Fcho2         | chr13:99493360-99585404   | 24.73873333 | 31.0057     |
| Kazn          | chr4:141658304-141795316  | 24.73276667 | 27.66493333 |
| Lyrm5         | chr6:145159653-145165062  | 24.73036667 | 10.40918667 |
| Hook3         | chr8:27131892-27229696    | 24.72363333 | 30.88963333 |
| Tbck          | chr3:132347107-132501470  | 24.7013     | 29.07276667 |
| Dcaf7         | chr11:105898185-105920637 | 24.68186667 | 27.87333333 |
| Pdk3          | chrX:91009954-91077434    | 24.6811     | 18.95013333 |
| Zfp800        | chr6:28189930-28211601    | 24.64553333 | 10.92631    |
| Ifngr2        | chr16:91547338-91564252   | 24.64423333 | 16.23371667 |
| Pion          | chr5:20692084-20797519    | 24.63406667 | 34.23576667 |
| Spast         | chr17:74738326-74790453   | 24.62846667 | 20.20043333 |
| Rnf103        | chr6:71443887-71460875    | 24.6243     | 46.4254     |
| 4833420G17Rik | chr13:120251565-120274924 | 24.61936667 | 21.17836667 |
| Zdhhc5        | chr2:84528076-84555321    | 24.61873333 | 31.14043333 |
| Pitpnb        | chr5:111759782-111817379  | 24.57606667 | 26.33556667 |
| Tbx3          | chr5:120120677-120134610  | 24.5641     | 81.2308     |
| Xk            | chrX:8849909-8890371      | 24.5577     | 4.87731     |
| 4930481A15Rik | chr19:5406873-5422847     | 24.55646667 | 50.17273333 |
| Sipa1l1       | chr12:83271002-83552771   | 24.5433     | 21.38303333 |
| U2af1         | chr17:31784026-31795699   | 24.53316667 | 28.1712     |
| Ppox          | chr1:173207122-173211317  | 24.5246     | 10.72608333 |
| 1700040N02Rik | chr2:170181860-170205935  | 24.52016667 | 0.066245333 |
| Usp4          | chr9:108250161-108294860  | 24.51966667 | 23.78258    |

|               |                           |             |             |
|---------------|---------------------------|-------------|-------------|
| Esf1          | chr2:139945616-139996294  | 24.51643333 | 20.75223333 |
| Rlim          | chrX:101152505-101176623  | 24.515      | 32.28223333 |
| Elk4          | chr1:133904181-133922261  | 24.5149     | 24.41183333 |
| Ndufaf3       | chr9:108468195-108469673  | 24.49883333 | 59.50283333 |
| Rfc1          | chr5:65653090-65726878    | 24.49423333 | 18.1519     |
| Nupl1         | chr14:60838304-60870215   | 24.4906     | 36.77766667 |
| Supt4h1       | chr11:87551066-87557119   | 24.49026667 | 45.17793333 |
| Hmgn2         | chr4:133520653-133523906  | 24.48843667 | 46.13203333 |
| Nr1d2         | chr14:19036569-19071620   | 24.48316667 | 14.91735333 |
| Dpysl2        | chr14:67421700-67487437   | 24.4801     | 31.1313     |
| Olfr1415      | chr1:94387394-94388330    | 24.47333333 | 0.351662667 |
| C030034I22Rik | chr17:69765786-69768532   | 24.4714     | 7.49904     |
| Frs2          | chr10:116507182-116585530 | 24.46836667 | 19.43093333 |
| Gga2          | chr7:129130235-129164712  | 24.4608     | 22.79976667 |
| Glis3         | chr19:28336937-28754567   | 24.4556     | 17.25543333 |
| Metap2        | chr10:93321234-93353947   | 24.4554     | 45.6731     |
| Polr3b        | chr10:84085181-84189923   | 24.4549     | 21.22983333 |
| Tbpl1         | chr10:22423682-22451253   | 24.45286667 | 12.75563333 |
| Chchd3        | chr6:32742226-33010152    | 24.43553333 | 22.53376667 |
| Cmc1          | chr9:117973644-118059314  | 24.42736667 | 20.21436667 |
| Ctnn          | chr7:151621628-151656840  | 24.4257     | 28.26223333 |
| Vps54         | chr11:21138891-21221136   | 24.4195     | 31.58343333 |
| Atp11a        | chr8:12757015-12868728    | 24.41156667 | 30.0228     |
| Hist1h4j      | chr13:21826964-21827276   | 24.40846667 | 4.563413333 |
| Mfsd1         | chr3:67386689-67408153    | 24.3991     | 60.4505     |
| Med8          | chr4:118081941-118088387  | 24.39756667 | 14.40151333 |
| Ccl5          | chr11:83339280-83344020   | 24.38696667 | 0           |
| Trappc8       | chr18:20975724-21054579   | 24.38556667 | 28.6652     |
| 2310002L13Rik | chr18:70400082-70404238   | 24.37451667 | 98.7584     |
| Atpbd4        | chr2:114342153-114480664  | 24.37373333 | 23.39043333 |
| Atrn          | chr2:130732231-130856062  | 24.37103333 | 22.2347     |
| Raf1          | chr6:115568590-115626653  | 24.36383333 | 41.11166667 |
| Ptpnj         | chr2:90269912-90420804    | 24.3582     | 20.8512     |
| Myh14         | chr7:51861189-51920873    | 24.353      | 30.93366667 |
| Rabl5         | chr5:137384019-137389114  | 24.3372     | 25.74177333 |
| Entpd7        | chr19:43764178-43808343   | 24.3018     | 15.20273333 |
| Srpr          | chr9:35018787-35024588    | 24.29856667 | 31.17693333 |
| Ccdc6         | chr10:69559868-69655948   | 24.27483333 | 15.3595     |
| Wdfy3         | chr5:102261971-102498940  | 24.2734     | 16.76273333 |
| Wdr33         | chr18:31963710-32068641   | 24.27143333 | 19.16383333 |
| Cln5          | chr14:103469432-103476847 | 24.27036667 | 30.5505     |
| Tceal1        | chrX:133242603-133244405  | 24.2609     | 9.101326667 |
| Gprasp1       | chrX:132277230-132338007  | 24.2515     | 56.07966667 |
| Fuca2         | chr10:13220833-13237081   | 24.2506     | 23.20283333 |
| Plekha1       | chr7:138009423-138056816  | 24.2473     | 35.37156667 |
| Appbp2        | chr11:85004811-85048622   | 24.23431    | 30.067      |
| Mdp1          | chr14:56276715-56279345   | 24.22713333 | 22.8956     |
| Naga          | chr15:82159961-82169256   | 24.2257     | 29.63193333 |
| Tomm7         | chr5:23344761-23349963    | 24.21866667 | 18.58513333 |
| Zzef1         | chr11:72609727-72740622   | 24.21333333 | 12.41328333 |
| Slc35a3       | chr3:116373715-116415198  | 24.18016667 | 28.62766667 |
| Banp          | chr8:124474432-124553158  | 24.18016667 | 7.442786667 |

|               |                           |             |             |
|---------------|---------------------------|-------------|-------------|
| Larp4         | chr15:99800504-99846789   | 24.17976667 | 29.90233333 |
| H2-Ab1        | chr17:34400171-34406363   | 24.17116667 | 5.291759667 |
| Cdc5l         | chr17:45528838-45570656   | 24.17063333 | 14.64976667 |
| Rgs3          | chr4:62220880-62364053    | 24.15573333 | 24.8932     |
| Hspb8         | chr5:116858503-116872873  | 24.149      | 74.32643333 |
| Rtf1          | chr2:119500803-119561143  | 24.142      | 34.4722     |
| Ptprk         | chr10:27794625-28317203   | 24.13253333 | 17.93296667 |
| Efr3a         | chr15:65618602-65705374   | 24.1203     | 18.93216667 |
| Ccdc92        | chr5:125314801-125342591  | 24.10306667 | 14.28801    |
| Vps35         | chr8:87784290-87823396    | 24.09573333 | 27.9055     |
| Alkbh1        | chr12:88769027-88784789   | 24.0767     | 33.43363333 |
| 2010321M09Rik | chr9:64808638-64834781    | 24.07533333 | 18.8383     |
| Rgl3          | chr9:21775970-21793897    | 24.07526667 | 12.25032333 |
| BC016495      | chr19:18706505-18726674   | 24.074      | 19.48616667 |
| Etfdh         | chr3:79407709-79432689    | 24.0679     | 20.33033333 |
| Laptm4b       | chr15:34167780-34214050   | 24.0646     | 37.20833333 |
| Acyp2         | chr11:30405991-30549396   | 24.0632     | 16.94578767 |
| Tsta3         | chr15:75755112-75760160   | 24.05943333 | 15.05192967 |
| Ddit4         | chr10:59412422-59414518   | 24.0169     | 44.29736667 |
| Sft2d1        | chr17:8503967-8520307     | 24.0079     | 43.27503333 |
| Tnpo3         | chr6:29490826-29559607    | 24.00726667 | 18.67986667 |
| Tet1          | chr10:62267317-62342762   | 23.99713333 | 19.795      |
| Psmc11        | chr11:80242116-80285635   | 23.9858     | 47.37393333 |
| Vps72         | chr3:94914963-94926973    | 23.9684     | 13.46479    |
| Atf6b         | chr17:34784124-34792017   | 23.96713333 | 12.3279     |
| Abce1         | chr8:82207340-82235639    | 23.9649     | 28.16286667 |
| Xrcc5         | chr1:72353994-72441527    | 23.9642     | 12.01886667 |
| Mon2          | chr10:122429116-122513561 | 23.9579     | 16.25693333 |
| Rbm4b         | chr19:4756524-4765940     | 23.9575     | 16.05903333 |
| Plec          | chr15:76001403-76061808   | 23.95106667 | 24.06463333 |
| Amfr          | chr8:96495487-96536540    | 23.9507     | 33.83453333 |
| Irf1          | chr11:53583515-53591876   | 23.94856667 | 3.709642    |
| Chka          | chr19:3851772-3894367     | 23.93996667 | 31.82976667 |
| Morc2a        | chr11:3549496-3590375     | 23.9329     | 29.9657     |
| Dtymk         | chr1:95689152-95698511    | 23.93206667 | 22.69053    |
| Gps2          | chr11:69727693-69730093   | 23.9255     | 27.09336667 |
| Il10rb        | chr16:91406479-91426079   | 23.92206667 | 5.556313333 |
| Foxp1         | chr6:98875335-99385339    | 23.91566667 | 30.71293333 |
| Dyrk1b        | chr7:28964501-28972313    | 23.91226667 | 16.785      |
| Nfib          | chr4:81936076-82151212    | 23.91043333 | 30.356      |
| Timm13        | chr10:80362194-80363714   | 23.90646    | 24.08413333 |
| Mcts1         | chrX:35953834-35966699    | 23.90513333 | 10.20854333 |
| Phf16         | chrX:20037652-20095022    | 23.89803333 | 14.79573333 |
| Sod2          | chr17:13200704-13210985   | 23.8841     | 33.24626667 |
| Azi2          | chr9:117949616-117973025  | 23.85653333 | 17.96426667 |
| Hist3h2ba     | chr11:58762412-58763032   | 23.84456    | 25.13876667 |
| Dnajc3        | chr14:119337153-119380924 | 23.83453333 | 23.02823333 |
| Erbp3         | chr10:128006423-128026557 | 23.83276667 | 22.39196667 |
| Rap1b         | chr10:117251652-117283030 | 23.81923333 | 36.31236667 |
| Shmt2         | chr10:126954178-126959500 | 23.81733333 | 24.4822     |
| Brms1         | chr19:5041403-5049917     | 23.80516667 | 11.81743667 |
| Med16         | chr10:79357451-79371683   | 23.79016667 | 18.94275333 |

|               |                           |             |             |
|---------------|---------------------------|-------------|-------------|
| Mapk1ip1      | chr7:146027500-146037950  | 23.7895     | 33.96391    |
| Pgpep1        | chr8:73170334-73183637    | 23.78913333 | 18.7842     |
| Hax1          | chr3:89799378-89802608    | 23.78803333 | 12.31965333 |
| Senp7         | chr16:56075521-56190124   | 23.78646667 | 17.4068     |
| Fam193b       | chr13:55640676-55672481   | 23.78176667 | 28.27253333 |
| Helz          | chr11:107409273-107548257 | 23.78006667 | 17.04846667 |
| Smcr8         | chr11:60591026-60601789   | 23.77366667 | 22.94236667 |
| Ebag9         | chr15:44451186-44472572   | 23.77343333 | 38.81656667 |
| Tspan12       | chr6:21721394-21802515    | 23.773      | 24.6793     |
| Synrg         | chr11:83777929-83855581   | 23.76983333 | 34.3316     |
| Zkscan1       | chr5:138526311-138549050  | 23.7636     | 23.9755     |
| Bbs2          | chr8:96591853-96622711    | 23.75756667 | 25.73356667 |
| Npepps        | chr11:97067170-97141890   | 23.74686667 | 32.3021     |
| Pdlim1        | chr19:40296728-40346106   | 23.74223333 | 34.39613333 |
| Snx5          | chr2:144075858-144096638  | 23.7408     | 49.1229     |
| Sec24a        | chr11:51505764-51570336   | 23.7404     | 14.08836667 |
| Sae1          | chr7:16912402-16973134    | 23.73153333 | 40.8942     |
| Echs1         | chr7:147291621-147302322  | 23.7286     | 12.91017    |
| Sik1          | chr17:31981194-31992737   | 23.7145     | 33.36333333 |
| Cycs          | chr6:50512561-50516473    | 23.6967     | 18.4675     |
| Eif1ax        | chrX:155810126-155823631  | 23.6964     | 43.34       |
| Mrpl43        | chr19:45079503-45080932   | 23.6945     | 24.4218     |
| Sprr2a2       | chr3:92019756-92026413    | 23.694      | 0.740539033 |
| Rtp4          | chr16:23610004-23614308   | 23.69176667 | 5.575553333 |
| Reg3g         | chr6:78416261-78418868    | 23.69170067 | 100.8333413 |
| Sprr2a2       | chr3:92054568-92061226    | 23.6883     | 0.740539033 |
| Syap1         | chrX:159294774-159326394  | 23.65943333 | 33.6228     |
| Supt5h        | chr7:29099914-29123738    | 23.65846667 | 19.51448333 |
| Stx8          | chr11:67779984-68020650   | 23.645      | 5.567483333 |
| 0610010K14Rik | chr11:70048705-70051416   | 23.64403333 | 23.9934     |
| Ptprs         | chr17:56551848-56615903   | 23.64213333 | 36.0456     |
| 2210018M11Rik | chr7:105739115-105805079  | 23.64066667 | 17.4541     |
| Lin37         | chr7:31340459-31344665    | 23.6241     | 28.5397     |
| Bicd2         | chr13:49436917-49482394   | 23.62346667 | 15.7196     |
| Mbnl3         | chrX:48466670-48559009    | 23.6208     | 13.71756667 |
| Tmem222       | chr4:132821959-132833705  | 23.61666667 | 16.62285333 |
| 1110008P14Rik | chr2:32234620-32237435    | 23.611      | 58.7871     |
| Hint3         | chr10:30328012-30338172   | 23.60627333 | 32.57552533 |
| Stat6         | chr10:127080041-127098043 | 23.60026667 | 17.58383333 |
| Nup98         | chr7:109282716-109358634  | 23.58806667 | 21.4579     |
| Tmem33        | chr5:67651890-67682700    | 23.57013333 | 17.58835667 |
| Mbtd1         | chr11:93747532-93808298   | 23.56996667 | 29.04046667 |
| Arnt          | chr3:95238311-95301161    | 23.56483333 | 50.77156667 |
| B230312A22Rik | chr4:43045285-43059092    | 23.56476667 | 13.30373667 |
| Tmf1          | chr6:97101943-97129118    | 23.56273333 | 21.53803333 |
| Rnf13         | chr3:57539987-57639155    | 23.55563333 | 23.985      |
| Slc25a20      | chr9:108564428-108586972  | 23.53409667 | 13.31907333 |
| Anapc2        | chr2:25127985-25141436    | 23.5313     | 28.58093333 |
| Rnf144b       | chr13:47218088-47343360   | 23.52013333 | 5.01078     |
| Ndufv2        | chr17:66428134-66450831   | 23.51716667 | 34.83916667 |
| lft74         | chr4:94281210-94359924    | 23.50213333 | 15.59683333 |
| Acadvl        | chr11:69823693-69828909   | 23.4893     | 30.561      |

|               |                           |             |             |
|---------------|---------------------------|-------------|-------------|
| Dctpp1        | chr7:134400475-134404181  | 23.48786667 | 23.4417     |
| Asf1a         | chr10:53316766-53329021   | 23.4852     | 13.35766667 |
| Cabin1        | chr10:75108854-75227102   | 23.47746667 | 15.43574333 |
| Kcnh2         | chr5:23825406-23857422    | 23.4687     | 132.7483333 |
| Mgrn1         | chr16:4886099-4938296     | 23.45826667 | 23.74016667 |
| Tapbp         | chr17:34056422-34066235   | 23.4524     | 17.88413333 |
| Ints12        | chr3:132754916-132773949  | 23.44873333 | 16.6302     |
| Slc25a39      | chr11:102264294-102268831 | 23.44356667 | 14.74527    |
| Cklf          | chr8:106774802-106788836  | 23.4358     | 57.93463333 |
| Tnks          | chr8:35892232-36028744    | 23.42786667 | 20.5157     |
| Adh5          | chr3:138106127-138118463  | 23.41776667 | 46.15596667 |
| Tmem14c       | chr13:41111618-41117951   | 23.41616667 | 32.53513333 |
| Dnajb9        | chr12:45306883-45311055   | 23.41513333 | 129.4366667 |
| Tmem123       | chr9:7764076-7794332      | 23.41246667 | 59.63083333 |
| Setd6         | chr8:98239812-98242904    | 23.37566333 | 40.1583     |
| Stat2         | chr10:127707631-127729905 | 23.37396667 | 22.02586    |
| Itpkb         | chr1:182260606-182353790  | 23.36646667 | 20.76213333 |
| Parp8         | chr13:117643630-117814323 | 23.3599     | 17.19716667 |
| Ccdc132       | chr6:3448392-3553531      | 23.34756667 | 15.33576667 |
| Map3k7        | chr4:32051081-32110441    | 23.32733333 | 20.4314     |
| 2410001C21Rik | chr2:172266077-172295399  | 23.3197     | 18.7733     |
| Ahcy12        | chr6:29718442-29862310    | 23.31786667 | 27.81726667 |
| C130039O16Rik | chr12:85490122-85559831   | 23.31706667 | 16.0948     |
| Golga3        | chr5:110605719-110652174  | 23.31653333 | 21.96993333 |
| Kin           | chr2:10002238-10014328    | 23.31463333 | 18.17763333 |
| Klhl9         | chr4:88364195-88368412    | 23.3055     | 35.44456667 |
| Surf4         | chr2:26775560-26789031    | 23.3005     | 34.5036     |
| Nop58         | chr1:59741849-59768354    | 23.2937     | 33.94206667 |
| Apip          | chr2:102913831-102932806  | 23.28413333 | 10.30283    |
| Gapvd1        | chr2:34532501-34610752    | 23.28243333 | 31.77723333 |
| 5430416N02Rik | chr5:100849860-100858554  | 23.2763     | 16.71127667 |
| Pou2f1        | chr1:167795284-167932765  | 23.27173333 | 30.7539     |
| Pold4         | chr19:4231898-4233634     | 23.27056333 | 16.91242    |
| Hsd17b2       | chr8:120225845-120282929  | 23.25883333 | 2.356893333 |
| lfrd1         | chr12:40929715-40949776   | 23.25763333 | 39.88576667 |
| Pfkl          | chr10:77449693-77472541   | 23.25366667 | 9.621803333 |
| Parl          | chr16:20279893-20302435   | 23.24076667 | 20.62276667 |
| Zfp828        | chr8:13869640-13881639    | 23.24036667 | 10.67111667 |
| Ldb1          | chr19:46107090-46119701   | 23.23573333 | 47.74346667 |
| Qsox2         | chr2:26064649-26092940    | 23.2204     | 15.5662     |
| C630004H02Rik | chr11:115209022-115229033 | 23.2153     | 49.39736667 |
| Flot1         | chr17:35960301-35969732   | 23.21443333 | 15.18264    |
| Mettl10       | chr7:140019143-140044330  | 23.20966667 | 15.28809    |
| Hbs1l         | chr10:21015784-21088695   | 23.2092     | 22.5738     |
| Tnks1bp1      | chr2:84890616-84913205    | 23.2009     | 11.73489    |
| Rbm12b        | chr4:12067263-12073892    | 23.18343333 | 9.87398     |
| Wipi2         | chr5:143105537-143145324  | 23.17773333 | 16.34707667 |
| Ap1m2         | chr9:21099900-21116777    | 23.17626667 | 26.4303     |
| Med11         | chr11:70265432-70267228   | 23.16898333 | 14.04858    |
| Snrnp200      | chr2:127034139-127066187  | 23.1487     | 29.52483333 |
| Uvrug         | chr7:106035252-106289654  | 23.14096667 | 20.82813333 |
| Slain2        | chr5:73305555-73370067    | 23.12836667 | 21.35876667 |

|               |                           |             |             |
|---------------|---------------------------|-------------|-------------|
| Odf2l         | chr3:144781552-144816879  | 23.12833333 | 14.67376667 |
| A430033K04Rik | chr5:139064086-139090054  | 23.1242     | 13.79898    |
| Atp6v0a2      | chr5:125079647-125202517  | 23.1216     | 16.40963333 |
| Capza1        | chr3:104625702-104667423  | 23.11096667 | 18.1898     |
| Kdelr1        | chr7:53128209-53139096    | 23.09456667 | 31.38186667 |
| Rcan2         | chr17:43938799-44176465   | 23.07663333 | 8.51825     |
| Cir1          | chr2:73121928-73150649    | 23.0706     | 14.23693333 |
| Eif2c2        | chr15:72932054-73015377   | 23.0698     | 27.039      |
| Aldh2         | chr5:122017695-122043833  | 23.067      | 33.60373333 |
| D11Wsu99e     | chr11:113522632-113545465 | 23.06186667 | 16.65373333 |
| Id3           | chr4:135699736-135701307  | 23.05806667 | 166.4873333 |
| Ankfy1        | chr11:72503503-72585648   | 23.05653333 | 22.88466667 |
| Gxylt1        | chr15:93070172-93105515   | 23.05413333 | 21.4392     |
| Rnf146        | chr10:29063981-29082248   | 23.05273333 | 16.70466667 |
| Ankmy2        | chr12:36883710-36923878   | 23.05263333 | 13.68429333 |
| Lman1         | chr18:66140392-66162289   | 23.0264     | 22.41423333 |
| Oaz2-ps       | chr9:65524354-65538107    | 23.02593333 | 36.6889     |
| Usp24         | chr4:105988817-106113932  | 23.00643333 | 23.5789     |
| Spcs3         | chr8:55605786-55615351    | 23.00363333 | 73.15366667 |
| Fnbp4         | chr2:90585526-90621177    | 22.99796667 | 31.74053333 |
| Uhrf2         | chr19:30105002-30168214   | 22.9899     | 17.82716667 |
| Hist1h1d      | chr13:23646900-23649877   | 22.98363333 | 7.454987333 |
| 0610007P14Rik | chr12:87156404-87165495   | 22.98306667 | 46.29033333 |
| Mcart1        | chr4:45408795-45421638    | 22.98233333 | 40.13253333 |
| Phc3          | chr3:30798216-30868337    | 22.97893333 | 25.1532     |
| Rad50         | chr11:53463020-53520821   | 22.97013333 | 19.77010333 |
| Snx4          | chr16:33251541-33299648   | 22.95996667 | 44.2429     |
| Hist1h3e      | chr13:23653823-23654234   | 22.9527     | 12.82176667 |
| Mink1         | chr11:70376382-70427984   | 22.9505     | 19.0812     |
| Abcc4         | chr14:118881913-119105441 | 22.94966667 | 20.67636667 |
| Tex264        | chr9:106561076-106588279  | 22.94773333 | 19.45646667 |
| Il28a         | chr7:29293879-29295379    | 22.932616   | 0           |
| Ankrd46       | chr15:36407422-36426546   | 22.9274     | 17.99993333 |
| Mapk8ip1      | chr2:92223832-92241420    | 22.922      | 39.98443333 |
| Sdccag8       | chr1:178744942-178950563  | 22.9169     | 10.91317333 |
| Ptk2          | chr15:73035534-73253621   | 22.88756667 | 14.69060333 |
| Sacm1l        | chr9:123438999-123501716  | 22.8868     | 17.41063333 |
| Narf          | chr11:121098549-121117170 | 22.87806667 | 25.46183333 |
| Tlk2          | chr11:105042843-105145270 | 22.86146667 | 20.80613333 |
| Lad1          | chr1:137715174-137729918  | 22.85693333 | 37.95916667 |
| Edem3         | chr1:153602503-153669458  | 22.84796667 | 16.27836667 |
| Ildr1         | chr16:36694123-36726827   | 22.84706667 | 25.41346667 |
| Lime1         | chr2:181115939-181118333  | 22.84653333 | 20.55833333 |
| Alkbh5        | chr11:60351184-60372014   | 22.8458     | 21.20453333 |
| Carm1         | chr9:21351337-21393909    | 22.83973333 | 46.29333333 |
| Fahd2a        | chr2:127261950-127270301  | 22.82063333 | 12.90483    |
| Bnip3         | chr7:146082518-146101189  | 22.81616667 | 23.1495     |
| Prkaa1        | chr15:5093860-5131899     | 22.81606667 | 20.7387     |
| Eif4ebp3      | chr18:36823713-36825978   | 22.8118     | 10.20476667 |
| Lmo4          | chr3:143851493-143868219  | 22.79926667 | 32.78296667 |
| Rps27a        | chr11:29445841-29448040   | 22.79463333 | 45.846      |
| DrosHa        | chr15:12754569-12865046   | 22.79333333 | 17.03693333 |

|               |                           |             |             |
|---------------|---------------------------|-------------|-------------|
| Ano3          | chr2:110498296-110790401  | 22.78968    | 3.097348333 |
| A330040F15Rik | chr19:12660357-12671056   | 22.78136667 | 1.097213333 |
| Gtpbp4        | chr13:8971723-8995258     | 22.77733333 | 35.45553333 |
| Mtmr2         | chr9:13553624-13610925    | 22.76816667 | 22.5533     |
| Bmpr1a        | chr14:35224253-35315732   | 22.75973333 | 35.94573333 |
| Mbtps1        | chr8:122032051-122082661  | 22.75303333 | 16.5528     |
| 2210016L21Rik | chr5:115392210-115398549  | 22.75133333 | 15.44089333 |
| Pgam5         | chr5:110688153-110698918  | 22.75116667 | 25.86063333 |
| Ngdn          | chr14:55634290-55642974   | 22.7504     | 6.885277    |
| 1500011H22Rik | chr5:122814592-122821972  | 22.7394     | 13.94873333 |
| Armc8         | chr9:99378809-99469318    | 22.73463333 | 19.6992     |
| Rprd2         | chr3:95563795-95622876    | 22.7272     | 27.35113333 |
| Polr2b        | chr5:77739508-7778353     | 22.7234     | 20.21023333 |
| Dguok         | chr6:83430207-83456963    | 22.7191     | 18.75776667 |
| Mphosph10     | chr7:71521426-71537122    | 22.7076     | 20.39453333 |
| Mau2          | chr8:72540021-72566633    | 22.6923     | 29.0017     |
| Ccdc91        | chr6:147424392-147581134  | 22.68893333 | 15.51447333 |
| Plxn2         | chr15:88985978-89011218   | 22.68013333 | 38.8943     |
| Arhgap44      | chr11:64815540-64976463   | 22.6794     | 16.42323333 |
| 4930506M07Rik | chr19:59047847-59150559   | 22.6759     | 19.29760667 |
| Tmed7         | chr18:46745581-46757189   | 22.67136667 | 22.56213333 |
| Cebpz         | chr17:79318342-79336410   | 22.6712     | 15.63846667 |
| Pfkfb2        | chr1:132585619-132625830  | 22.66926667 | 30.20403333 |
| Slc11a2       | chr15:100218330-100253486 | 22.66616667 | 11.64088667 |
| Rb1cc1        | chr1:6204742-6266185      | 22.66203333 | 34.84973333 |
| Rab3ip        | chr10:116342839-116387436 | 22.6583     | 34.01866667 |
| Robo2         | chr16:73892550-74411157   | 22.65313333 | 7.277096667 |
| Zcchc2        | chr1:107886982-107930654  | 22.653      | 25.35513333 |
| Nfu1          | chr6:86959829-86978455    | 22.64684333 | 12.62126667 |
| Prdx3         | chr19:60939968-60950441   | 22.64173333 | 14.05302433 |
| Lgr4          | chr2:109757803-109854414  | 22.63266667 | 19.38023333 |
| Krt76         | chr15:101714781-101723351 | 22.6253     | 230.9556333 |
| Trp53bp1      | chr2:121022464-121097122  | 22.62456667 | 25.6668     |
| Yipf1         | chr4:106986967-107032428  | 22.622      | 19.89045667 |
| Tada3         | chr6:113316654-113327514  | 22.62006667 | 11.37261667 |
| Nsmce2        | chr15:59205752-59433239   | 22.61623333 | 20.55856667 |
| Ppp1r14b      | chr19:7049537-7051814     | 22.60276667 | 25.83346667 |
| Gnaq          | chr19:16207320-16461943   | 22.6006     | 46.54276667 |
| Phf1          | chr17:27070071-27074835   | 22.5942     | 13.99183667 |
| E430025E21Rik | chr15:59163551-59205707   | 22.58536667 | 28.90593333 |
| Hsd17b4       | chr18:50287854-50355924   | 22.58523333 | 22.66576667 |
| Uprt          | chrX:101678120-101701601  | 22.5835     | 19.73274333 |
| Ncoa2         | chr1:13129239-13364164    | 22.58213333 | 22.78186667 |
| Sptlc1        | chr13:53428118-53472730   | 22.57786667 | 18.92693333 |
| Nutf2-ps1     | chr8:108384559-108403237  | 22.57493333 | 19.8836     |
| E2f2          | chr4:135728308-135751971  | 22.5679     | 22.44766667 |
| Casp2         | chr6:42215037-42232495    | 22.55853333 | 17.7427     |
| Pisd          | chr5:33078961-33128275    | 22.549      | 21.80483333 |
| Thumpd1       | chr7:126858607-126864279  | 22.54646667 | 21.7801     |
| Neb1          | chr2:17268360-17652695    | 22.53463333 | 32.00223333 |
| Gpr137b-ps    | chr13:12706332-12742662   | 22.53283333 | 17.2582     |
| 2700060E02Rik | chr14:20630623-20643045   | 22.5264     | 23.51353333 |



|               |                           |             |             |
|---------------|---------------------------|-------------|-------------|
| Gsn           | chr2:35111878-35163422    | 22.5262     | 20.75633333 |
| Letm1         | chr5:34084000-34125353    | 22.51986667 | 15.2243     |
| Pik3c3        | chr18:30432549-30507774   | 22.51883333 | 16.36766667 |
| Slco3a1       | chr7:81420303-81699666    | 22.5144     | 22.5934     |
| Wtap          | chr17:13159664-13185405   | 22.4919     | 19.37953333 |
| Tmem57        | chr4:134358675-134409260  | 22.47433333 | 34.42576667 |
| Gm16039       | chr6:8209287-8378765      | 22.4714     | 0.366319533 |
| 1110057K04Rik | chr12:8214912-8292565     | 22.47036667 | 17.96913333 |
| Dnajc4        | chr19:7062400-7066762     | 22.4547     | 24.23046667 |
| Robo1         | chr16:72663393-73046345   | 22.4458     | 41.77866667 |
| Sssca1        | chr19:5730305-5731721     | 22.4327     | 33.41006667 |
| Slbp          | chr5:33982710-33994955    | 22.4302     | 20.0393     |
| Tceb1         | chr1:16632845-16646946    | 22.42096667 | 52.1651     |
| C330019G07Rik | chr5:33131855-33196879    | 22.4205     | 27.37956667 |
| Got2          | chr8:98388036-98412265    | 22.41093333 | 34.70903333 |
| Rhbdd1        | chr1:82313153-82441941    | 22.40346667 | 11.71679    |
| Lrpap1        | chr5:35434154-35448346    | 22.40186667 | 15.4474     |
| Xpo6          | chr7:133245232-133343922  | 22.3958     | 43.19093333 |
| Uaca          | chr9:60642354-60728177    | 22.3915     | 13.22496    |
| Zhx2          | chr15:57526221-57671387   | 22.38966667 | 16.47969667 |
| Ablim3        | chr18:61959046-62071506   | 22.3811     | 26.41666667 |
| Fam165b       | chr16:92301547-92313286   | 22.36973333 | 8.806366667 |
| S100a10       | chr3:93359038-93368567    | 22.36803333 | 32.10773333 |
| Rab3a         | chr8:73278577-73282585    | 22.35623333 | 27.85896667 |
| Tuba4a        | chr1:75211548-75215828    | 22.355      | 60.6665     |
| Gstt3         | chr10:75236866-75244159   | 22.34789    | 10.82892333 |
| Eif2ak2       | chr17:79251889-79281912   | 22.34786667 | 21.35563    |
| Smpd1         | chr7:112702873-112706903  | 22.34673333 | 9.456966667 |
| Mrpl40        | chr16:18872110-18876730   | 22.3421     | 15.27610333 |
| Kcne3         | chr7:107325179-107333379  | 22.34193333 | 7.588806667 |
| Coq5          | chr5:115729710-115746981  | 22.3308     | 12.69993333 |
| Ubqln4        | chr3:88357637-88373647    | 22.32723333 | 11.19308    |
| Slc1a4        | chr11:20202182-20232716   | 22.32193333 | 13.90104333 |
| Eif4a3        | chr11:119149676-119161357 | 22.30942667 | 30.9277     |
| Atp13a2       | chr4:140542787-140563616  | 22.30433333 | 9.719506667 |
| Ncor2         | chr5:125497522-125659584  | 22.29693333 | 20.19343333 |
| Ddx26b        | chrX:53708015-53761020    | 22.29523333 | 37.20703333 |
| Xpnpep1       | chr19:53065672-53113032   | 22.29483333 | 9.57185     |
| Arfgap2       | chr2:91105271-91117528    | 22.29126667 | 19.36476667 |
| A3galt2       | chr4:128436501-128446542  | 22.28623333 | 8.812836667 |
| Pim3          | chr15:88692623-88696156   | 22.2595     | 33.57976667 |
| Bmp2          | chr2:133378934-133388621  | 22.25593333 | 12.46775667 |
| Gm9958        | chr5:90796022-90797514    | 22.25043333 | 3.511903667 |
| Pan2          | chr10:127740390-127758414 | 22.24543333 | 15.22475667 |
| Mrps12        | chr7:29524659-29526800    | 22.22653333 | 13.05214667 |
| Nasp          | chr4:116273656-116300556  | 22.21273333 | 27.85616667 |
| Akap8l        | chr17:32458368-32487522   | 22.20556667 | 12.46267667 |
| Dcaf13        | chr15:38944419-38978401   | 22.2008     | 19.1182     |
| 1110038F14Rik | chr15:76778973-76781161   | 22.2006     | 8.41254     |
| Avl9          | chr6:56664898-56711905    | 22.18476667 | 24.05486667 |
| Xrn2          | chr2:146838795-146903733  | 22.17023333 | 23.47363333 |
| Rc3h1         | chr1:162836541-162905107  | 22.16966667 | 27.05843333 |

|               |                           |             |             |
|---------------|---------------------------|-------------|-------------|
| Al847159      | chr2:129003883-129006409  | 22.15253333 | 0.053488333 |
| Slc35b1       | chr11:95246235-95252966   | 22.14476667 | 31.2129     |
| Mcts2         | chr2:152512883-152513678  | 22.1422     | 28.62393333 |
| 1810074P20Rik | chr4:25175732-25208968    | 22.12436667 | 28.27876667 |
| Ppp4r2        | chr6:100783631-100818711  | 22.10703333 | 26.26436667 |
| Zdhhc1        | chr8:107996324-108020770  | 22.0931     | 20.69857333 |
| Nfkbia        | chr12:56590395-56593634   | 22.07893333 | 17.95137333 |
| St14          | chr9:30896174-30939384    | 22.065      | 29.104      |
| Tmem184b      | chr15:79191113-79233733   | 22.06476667 | 36.4525     |
| Dcaf5         | chr12:81436833-81537588   | 22.06473333 | 33.49576667 |
| Rhot2         | chr17:25975782-25981796   | 22.06326667 | 31.41023333 |
| Wdr8          | chr4:153516480-153530927  | 22.0531     | 9.86941     |
| Necap1        | chr6:122824574-122838959  | 22.04706667 | 17.52909667 |
| Mrps17        | chr5:130221402-130224566  | 22.03501667 | 15.8777     |
| Ring1         | chr17:34157736-34161625   | 22.03023333 | 9.452456667 |
| Sult2b1       | chr7:52985352-53014925    | 22.0204     | 31.53886667 |
| 2510049J12Rik | chr6:115533564-115542594  | 22.0136     | 7.249086667 |
| Med13l        | chr5:119010727-119215446  | 22.0103     | 15.75396667 |
| Patz1         | chr11:3189133-3209086     | 21.99391333 | 19.19789667 |
| Dcxr          | chr11:120586686-120588595 | 21.9889     | 16.62277967 |
| Mast3         | chr8:73302015-73316332    | 21.988      | 33.28976667 |
| Jarid2        | chr13:44826142-45017012   | 21.9716     | 23.00453333 |
| Diablo        | chr5:123961338-123974173  | 21.9691     | 35.6955     |
| Pik3r1        | chr13:102450717-102538172 | 21.9558     | 43.99603333 |
| Tceb3         | chr4:135559284-135577564  | 21.95093333 | 18.31753333 |
| Ttc14         | chr3:33699116-33715556    | 21.94646667 | 16.76056667 |
| Ccdc34        | chr2:109857973-109885482  | 21.94136667 | 18.25873333 |
| Rtcd1         | chr3:116191881-116211093  | 21.93893333 | 22.28206467 |
| Pcdhb14       | chr18:37607310-37610748   | 21.93703333 | 14.84509333 |
| Gna12         | chr5:141235897-141306385  | 21.93113333 | 20.62713333 |
| Al462493      | chr19:8954503-8955423     | 21.9292     | 31.76793333 |
| Zfp384        | chr6:124959255-124987888  | 21.92403333 | 14.43667333 |
| Zp2           | chr7:127275874-127288804  | 21.92086667 | 7.63474     |
| Rbm12         | chr2:155920617-155937701  | 21.91066667 | 23.38153333 |
| Taf4a         | chr2:179646850-179711351  | 21.9101     | 23.02973333 |
| Nampt         | chr12:33505199-33538234   | 21.90973333 | 17.41822667 |
| Tekt5         | chr16:10361346-10395541   | 21.90733333 | 29.87906667 |
| Morf4l1       | chr9:89986506-90009658    | 21.90273333 | 28.27386667 |
| Nadk          | chr4:154936500-154965110  | 21.89983333 | 18.26456667 |
| Elovl1        | chr4:118100697-118105521  | 21.89441667 | 36.39933333 |
| Usp53         | chr3:122636518-122687365  | 21.88336667 | 18.46716    |
| Znrf2         | chr6:54766909-54840218    | 21.88216667 | 22.61963333 |
| Tnfaip1       | chr11:78336351-78349762   | 21.8767     | 18.9634     |
| Upf2          | chr2:5872514-5977749      | 21.86366667 | 22.0036     |
| Ube2z         | chr11:95908749-95926678   | 21.85566667 | 18.67426667 |
| Ammecr1l      | chr18:31919477-31943737   | 21.83953333 | 33.75816667 |
| Fubp1         | chr3:151873421-151899794  | 21.8338     | 22.38023333 |
| Snhg8         | chr3:123210469-123211254  | 21.83073333 | 8.078116667 |
| Ttll1         | chr15:83314198-83341337   | 21.8284     | 10.98065    |
| Dcaf12        | chr4:41238332-41261934    | 21.81546667 | 29.19196667 |
| Ptpn9         | chr9:56842774-56910614    | 21.79396667 | 40.8028     |
| Aurkaip1      | chr4:155205377-155207207  | 21.79033333 | 34.52913333 |

|               |                           |             |             |
|---------------|---------------------------|-------------|-------------|
| Nap1l4        | chr7:150699483-150734995  | 21.78146667 | 34.52606667 |
| Ppfbp1        | chr6:146837015-146980545  | 21.77803333 | 14.35936667 |
| Usmg5         | chr19:47157960-47165115   | 21.76416667 | 21.8516     |
| Sms           | chrX:153881885-153929978  | 21.7533     | 5.146093333 |
| 5730455O13Rik | chr19:38262968-38298622   | 21.74606667 | 16.922072   |
| Tor1aip1      | chr1:157851728-157883610  | 21.74276667 | 16.3423     |
| Eci2          | chr13:35069616-35086013   | 21.73756667 | 22.95526667 |
| Gt(ROSA)26Sor | chr6:113017422-113027238  | 21.73723333 | 12.82347    |
| Aip           | chr19:4114445-4125827     | 21.73078667 | 13.47556667 |
| Tia1          | chr6:86354212-86383399    | 21.7252     | 29.65723333 |
| 1700037H04Rik | chr2:130972060-130985756  | 21.70666    | 12.93711    |
| 1810013D10Rik | chr5:53658344-53669779    | 21.69126667 | 14.96489    |
| Pole4         | chr6:82596705-82602859    | 21.688      | 9.877443333 |
| Kbtbd2        | chr6:56727518-56747807    | 21.66203333 | 41.5261     |
| Lyn           | chr4:3605267-3718759      | 21.6539     | 12.69876667 |
| Pgrmc1        | chrX:34138219-34146074    | 21.65186667 | 20.41506667 |
| Rufy3         | chr5:89012598-89071721    | 21.6484     | 17.1833     |
| Lancl3        | chrX:8777098-8845211      | 21.64666667 | 9.999793333 |
| Ddx41         | chr13:55631770-55638019   | 21.62865    | 20.88953333 |
| Stk40         | chr4:125781200-125818273  | 21.62713333 | 10.85267    |
| H2-Aa         | chr17:34419695-34424716   | 21.62581667 | 7.030666667 |
| Hist1h2bh     | chr13:23634840-23635221   | 21.6229     | 28.74256667 |
| 2310044H10Rik | chr7:51745307-51751883    | 21.6182     | 36.35116667 |
| Trpc4ap       | chr2:155460012-155518120  | 21.60823333 | 15.57629    |
| Ctss          | chr3:95330707-95360325    | 21.60247667 | 0.269826    |
| Lgals12       | chr19:7671150-7681666     | 21.59563333 | 4.227456667 |
| Rnf44         | chr13:54780759-54795321   | 21.595      | 21.5978     |
| Vps41         | chr13:18809160-18958680   | 21.59026667 | 29.8226     |
| Ggps1         | chr13:14144713-14155668   | 21.58196667 | 38.0356     |
| 1110003E01Rik | chr5:65839993-65884074    | 21.57713333 | 30.44206667 |
| Mpnd          | chr17:56148623-56156206   | 21.56376667 | 31.65826667 |
| Inpp1         | chr7:108971145-108986740  | 21.5555     | 27.68273333 |
| Srfbp1        | chr18:52625346-52650392   | 21.54566667 | 8.910872667 |
| Psm10         | chrX:137482963-137491250  | 21.54075    | 13.40878667 |
| Ttc35         | chr15:43308774-43359323   | 21.5404     | 30.21443333 |
| Pclo          | chr5:14514917-14863459    | 21.53706667 | 23.3184     |
| Nudcd3        | chr11:6005694-6100454     | 21.53624333 | 24.90145    |
| A2ld1         | chr14:123290081-123312387 | 21.5334     | 21.19039333 |
| 0610007L01Rik | chr5:130695613-130719635  | 21.53196667 | 12.64385333 |
| Tusc3         | chr8:40068920-40250468    | 21.5307     | 15.36169333 |
| Mkrn2         | chr6:115551955-115568688  | 21.52863333 | 13.64662    |
| Lrrc16a       | chr13:24104352-24372659   | 21.52473333 | 19.60703333 |
| Trim33        | chr3:103083215-103162691  | 21.5163     | 27.50693333 |
| Plxna2        | chr1:196446022-196643062  | 21.5135     | 10.62445333 |
| 1110034B05Rik | chr1:57445087-57463518    | 21.51203333 | 18.24786667 |
| Ski           | chr4:154528183-154596644  | 21.5072     | 29.90116667 |
| Kdm5a         | chr6:120314116-120394592  | 21.50143333 | 26.76036667 |
| Txlna         | chr4:129303320-129318309  | 21.49906667 | 21.18946667 |
| Cnih          | chr14:47395241-47408032   | 21.49216667 | 31.516      |
| Smarchb1      | chr10:75359513-75384359   | 21.4872     | 38.2677     |
| Mrpl9         | chr3:94247257-94252630    | 21.48403333 | 34.99693333 |
| Plxn1         | chr9:108997949-109022429  | 21.48033333 | 35.7608     |

|               |                           |             |             |
|---------------|---------------------------|-------------|-------------|
| Pde6d         | chr1:88439589-88479076    | 21.47136667 | 28.01217    |
| Ddx58         | chr4:40150809-40186858    | 21.46416667 | 7.76915     |
| Impdh1        | chr6:29150439-29162271    | 21.4552     | 22.081      |
| 1190005F20Rik | chr1:153275777-153305313  | 21.44256667 | 16.9199     |
| Eif2s1        | chr12:79963058-79987997   | 21.4331     | 38.97963333 |
| Prpf39        | chr12:66137320-66164373   | 21.43046667 | 29.51303333 |
| Csnk1e        | chr15:79248281-79272487   | 21.4301     | 26.38076667 |
| Igsf8         | chr1:174242537-174249966  | 21.41733333 | 83.13023333 |
| Dicer1        | chr12:105925951-105990162 | 21.41243333 | 19.4244     |
| 2810025M15Rik | chr1:159342482-159350367  | 21.41231333 | 6.49288     |
| Rbm4          | chr19:4784292-4793877     | 21.4116     | 10.17482    |
| Rab27a        | chr9:72892671-72945399    | 21.40516667 | 22.40066667 |
| Vps37c        | chr19:10763304-10788909   | 21.40383333 | 22.22146667 |
| Faf1          | chr4:109349231-109636565  | 21.4034     | 17.4905     |
| St6galnac2    | chr11:116538018-116555974 | 21.4005     | 37.36146667 |
| Clptm1l       | chr13:73741449-73758087   | 21.39856667 | 19.96126667 |
| AI314180      | chr4:58812902-58925597    | 21.39516667 | 25.15456667 |
| Senp3         | chr11:69486611-69495586   | 21.39396667 | 20.60513333 |
| 4932702P03Rik | chr13:24997468-25003649   | 21.39196333 | 43.57976667 |
| Ep400         | chr5:111093391-111199736  | 21.3886     | 18.5978     |
| Med30         | chr15:52543999-52561986   | 21.37199333 | 17.97295667 |
| Slu7          | chr11:43247232-43261483   | 21.37186667 | 21.65636667 |
| Lor           | chr3:91884192-91887064    | 21.3622     | 31.38213333 |
| Bdp1          | chr13:100787948-100874025 | 21.3575     | 19.99333333 |
| Pcdhgb7       | chr18:37911432-38001524   | 21.3506     | 2.2173376   |
| Chmp1b        | chr18:67365012-67367541   | 21.3495     | 19.57303333 |
| Isy1          | chr6:87768441-87788753    | 21.34480667 | 13.60574    |
| Vps13b        | chr15:35301300-35860984   | 21.34136667 | 17.0736     |
| D930016D06Rik | chr5:104954753-104983230  | 21.3407     | 16.11863    |
| Spa17         | chr9:37410878-37421305    | 21.33436667 | 14.56321    |
| Eny2          | chr15:44259656-44269231   | 21.32256667 | 13.89006667 |
| Snrpf         | chr10:93045773-93052403   | 21.31043333 | 13.36587    |
| Man2a1        | chr17:64950988-65104450   | 21.30383333 | 12.46559333 |
| Sf3b5         | chr10:12728255-12728989   | 21.29863333 | 17.02113333 |
| Tmem9         | chr1:137904795-137931607  | 21.2851     | 30.94499    |
| Bicd1         | chr6:149357407-149507379  | 21.26976667 | 16.26223333 |
| Hist1h4a      | chr13:23852714-23853026   | 21.26213333 | 4.98054     |
| Zmat2         | chr18:36953576-36959314   | 21.25856667 | 23.4994     |
| Tmem106c      | chr15:97794659-97800717   | 21.25713    | 12.87178333 |
| Usp3          | chr9:66365687-66440787    | 21.2549     | 17.55580667 |
| Fech          | chr18:64616203-64648720   | 21.25356667 | 14.96903    |
| Snpc3         | chr4:83063647-83099244    | 21.2495     | 15.52709667 |
| Prr24         | chr7:16857361-16859041    | 21.2405     | 14.1754     |
| Wdr61         | chr9:54564961-54582335    | 21.23906667 | 21.92563333 |
| Vipar         | chr12:88579824-88607236   | 21.23703333 | 27.38926667 |
| Ranbp2        | chr10:57909599-57956902   | 21.23586667 | 31.60673333 |
| Hk1           | chr10:61731602-61842656   | 21.23203333 | 16.70073333 |
| Spag9         | chr11:93857404-93987396   | 21.22346667 | 14.99846667 |
| Ier3ip1       | chr18:77168765-77180353   | 21.21863333 | 33.18226667 |
| Pqbp1         | chrX:7471644-7476395      | 21.20643333 | 58.9658     |
| Per1          | chr11:68912457-68923459   | 21.20573333 | 16.2763     |
| Lonrf2        | chr1:38851353-38878060    | 21.19306667 | 13.17866667 |

|               |                           |             |             |
|---------------|---------------------------|-------------|-------------|
| Wdr43         | chr17:71965554-72008371   | 21.187      | 16.00928    |
| Hrsp12        | chr15:34413776-34425001   | 21.1866     | 33.61013333 |
| D930048N14Rik | chr11:51464455-51471183   | 21.17843333 | 7.660383333 |
| 2810001G20Rik | chr11:63892985-63896761   | 21.17253    | 23.1906     |
| Pcdhga12      | chr18:37925233-38001526   | 21.1706     | 0.688554333 |
| Exoc2         | chr13:30905786-31065916   | 21.1685     | 23.19186667 |
| Txnl4a        | chr18:80403536-80422590   | 21.16736667 | 30.20816667 |
| Mllt11        | chr3:95022465-95032599    | 21.15072    | 25.27086667 |
| Pcdhgb8       | chr18:37921454-38001526   | 21.1505     | 3.792981667 |
| Pigc          | chr1:163899318-163903566  | 21.1472     | 5.730063333 |
| H2-Ke2        | chr17:34075853-34077288   | 21.13776667 | 13.83860667 |
| Pop5          | chr5:115685859-115690979  | 21.13496667 | 15.17102333 |
| Pcmt1d1       | chr1:7079000-7163709      | 21.12386667 | 40.66643333 |
| Cluap1        | chr16:3909008-3941147     | 21.12283333 | 13.59940333 |
| Tacstd2       | chr6:67484052-67485816    | 21.11953333 | 88.48336667 |
| Hook2         | chr8:87514493-87527263    | 21.11023333 | 9.76156     |
| Pat11         | chr19:11986888-12019586   | 21.09223333 | 19.26063333 |
| Sf3b4         | chr3:95976472-95981487    | 21.0917     | 19.78566333 |
| Eif3b         | chr5:140895258-140919312  | 21.08476667 | 33.17613333 |
| Ubqln2        | chrX:149932774-149936101  | 21.07673333 | 17.46606667 |
| Rg9mtd1       | chr16:56033832-56037887   | 21.06615333 | 7.72911     |
| Fam60a        | chr6:148869580-148894954  | 21.05956667 | 57.1163     |
| Scmh1         | chr4:120077885-120202804  | 21.05856667 | 25.9146     |
| 5133401N09Rik | chr13:58259009-58266054   | 21.0525     | 18.03283333 |
| Zfp706        | chr15:36926781-36937157   | 21.04906667 | 24.63363333 |
| Tmem214       | chr5:31172019-31179840    | 21.04776667 | 19.20336667 |
| Qars          | chr9:108410335-108418272  | 21.04713333 | 29.0438     |
| Usp18         | chr6:121195923-121220935  | 21.04412667 | 8.683652667 |
| Ddx23         | chr15:98475937-98493320   | 21.04156667 | 17.81749667 |
| Rpl12         | chr2:32817231-32819565    | 21.03976667 | 38.76703333 |
| Taf12         | chr4:131830289-131849244  | 21.03966667 | 12.90372333 |
| Trmu          | chr15:85709756-85727823   | 21.03962333 | 4.94033     |
| Scoc          | chr8:85958391-85982290    | 21.03883333 | 17.52383333 |
| Hes1          | chr16:30065442-30067882   | 21.03776667 | 31.7314     |
| Fam92a        | chr4:12080868-12099162    | 21.03126667 | 35.1173     |
| Immp1l        | chr2:105744794-105805715  | 21.02773333 | 17.30003333 |
| Snrnp35       | chr5:124933163-124941131  | 21.02737667 | 16.85056667 |
| Pdcd2         | chr17:15658538-15664265   | 21.0271     | 39.21183333 |
| Hmgxb4        | chr8:77517601-77555871    | 21.0179     | 12.75904    |
| Naa20         | chr2:145728976-145742161  | 21.002      | 6.881903333 |
| Psm3          | chr11:98543867-98557292   | 20.99906667 | 20.10416667 |
| 4922501C03Rik | chr9:87086797-87150367    | 20.9893     | 11.35030667 |
| Trim8         | chr19:46576137-46590945   | 20.96816667 | 16.05956667 |
| Phf2          | chr13:48897118-48966254   | 20.96426667 | 27.9262     |
| Hist1h2bg     | chr13:23663268-23663883   | 20.9562     | 24.99166667 |
| Rnf169        | chr7:107068764-107128968  | 20.9556     | 10.31889    |
| Brap          | chr5:122110594-122137256  | 20.95006667 | 11.67985    |
| Fam20a        | chr11:109534239-109583570 | 20.94926667 | 2.36242     |
| As3mt         | chr19:46781932-46815585   | 20.94151    | 17.58868333 |
| Sh3yl1        | chr12:31596533-31645014   | 20.93543333 | 25.86053333 |
| Gar1          | chr3:129527829-129534314  | 20.93017667 | 15.19153    |
| Snap47        | chr11:59220651-59263458   | 20.92146667 | 27.96177333 |

|               |                           |             |             |
|---------------|---------------------------|-------------|-------------|
| Zfp655        | chr5:145992583-146008175  | 20.9187     | 21.77033333 |
| Yme1l1        | chr2:23012024-23054780    | 20.91863333 | 24.86466667 |
| Phtf1         | chr3:103772032-103811414  | 20.9127     | 19.52223667 |
| Pex26         | chr6:121133684-121146203  | 20.9043     | 26.0376     |
| Xpo1          | chr11:23156040-23197597   | 20.9042     | 22.57643333 |
| Gpd1l         | chr9:114808456-114843105  | 20.899      | 27.38343333 |
| Cldn6         | chr17:23816331-23819414   | 20.89127    | 16.60405667 |
| Cspp1         | chr1:10028298-10126849    | 20.8825     | 17.7885     |
| Hivep1        | chr13:42147389-42280395   | 20.879      | 29.981      |
| Fgf21         | chr7:52869259-52870860    | 20.87096667 | 0.232854667 |
| Fam57a        | chr11:76015557-76021759   | 20.8595     | 47.49086667 |
| Atp6ap2       | chrX:12164884-12194177    | 20.8482     | 23.06566667 |
| 9430023L20Rik | chr15:101114731-101121365 | 20.8411     | 16.03993333 |
| 1110049F12Rik | chr4:135531516-135543159  | 20.82163333 | 7.10262     |
| Ndfip2        | chr14:105657889-105708515 | 20.81663333 | 17.96963333 |
| Skiv2l        | chr17:34976170-34987149   | 20.8124     | 23.69086667 |
| Nf1           | chr11:79153393-79395111   | 20.8116     | 13.80503333 |
| Hook1         | chr4:95634069-95690965    | 20.80776667 | 12.28431667 |
| Rnf170        | chr8:27229851-27254341    | 20.80693333 | 9.671376667 |
| Wipf2         | chr11:98724911-98766892   | 20.7992     | 18.5256     |
| Hsd12         | chr4:59594434-59631566    | 20.79133333 | 21.13296667 |
| Nup62         | chr7:52071789-52086176    | 20.79045333 | 24.78216667 |
| Elf2          | chr3:51059586-51129909    | 20.7672     | 20.911      |
| Samd10        | chr2:181329923-181333852  | 20.75813333 | 47.70616667 |
| Ces1d         | chr8:95689970-95721703    | 20.75193333 | 11.32922867 |
| S100a13       | chr3:90318356-90328503    | 20.748      | 13.42128    |
| Agt           | chr8:127080486-127093607  | 20.745      | 26.79406667 |
| Mansc1        | chr6:134559224-134582506  | 20.73533333 | 5.965843333 |
| Gm10052       | chr15:103070862-103075015 | 20.71333333 | 30.9407     |
| Gsg1l         | chr7:133021932-133225925  | 20.70686667 | 58.90933333 |
| Ppp1r7        | chr1:95240221-95264195    | 20.7057     | 15.8722     |
| Armc1         | chr3:19032143-19063065    | 20.7034     | 17.04584667 |
| Kars          | chr8:114517339-114535205  | 20.6956     | 18.11893333 |
| Elavl1        | chr8:4284781-4325100      | 20.69453333 | 26.3178     |
| D14Abb1e      | chr14:28242032-28296740   | 20.69423333 | 20.92653333 |
| Tmem63b       | chr17:45797125-45823167   | 20.69046667 | 72.58233333 |
| lqcc          | chr4:129292860-129296337  | 20.6736     | 5.441233333 |
| Spty2d1       | chr7:54245765-54263784    | 20.67223333 | 15.9337     |
| Ppap2a        | chr13:113590999-113657888 | 20.65866667 | 9.913143333 |
| Phkb          | chr8:88364900-88584541    | 20.64943333 | 25.94503333 |
| Rnf141        | chr7:117960048-117987895  | 20.64326667 | 14.24427333 |
| Rnf145        | chr11:44332465-44379022   | 20.6397     | 22.06203    |
| Polr2e        | chr10:79498697-79502404   | 20.6395     | 42.80786667 |
| Pik3c2b       | chr1:134942588-135005265  | 20.6344     | 31.2828     |
| 2310030G06Rik | chr9:50547795-50554626    | 20.6198     | 21.6966     |
| Dusp18        | chr11:3795242-3801299     | 20.61536667 | 13.48206667 |
| Klhl24        | chr16:20097626-20127817   | 20.6103     | 27.86723333 |
| Ppp2r2a       | chr14:67632892-67691308   | 20.6038     | 23.54373333 |
| Ebna1bp2      | chr4:118293403-118300381  | 20.60086667 | 13.58423333 |
| Ppap2c        | chr10:78989173-78996532   | 20.58933333 | 23.6933     |
| Dnajc9        | chr14:21203859-21208132   | 20.57636667 | 15.37243333 |
| Casd1         | chr6:4551065-4593381      | 20.57266667 | 13.88612667 |

|           |                           |             |             |
|-----------|---------------------------|-------------|-------------|
| Mapre1    | chr2:153567022-153599050  | 20.57153333 | 24.7932     |
| Ankle2    | chr5:110660022-110685670  | 20.57096667 | 12.55816667 |
| Crim1     | chr17:78599587-78775932   | 20.56986667 | 5.251756667 |
| Ints3     | chr3:90195301-90237558    | 20.55786667 | 10.16303333 |
| Rel       | chr11:23641728-23670970   | 20.53833333 | 16.80000333 |
| Prepl     | chr17:85462816-85489614   | 20.5192     | 21.33193333 |
| Wbp4      | chr14:79859743-79881075   | 20.51013333 | 13.88537    |
| Vegfa     | chr17:46153942-46169326   | 20.49297333 | 3.321903333 |
| Ide       | chr19:37343230-37405103   | 20.49196667 | 33.64413333 |
| Zfand3    | chr17:30142031-30346965   | 20.49093333 | 13.54563    |
| LOC106740 | chr17:15084740-15085828   | 20.48592333 | 2.846895333 |
| Polr3d    | chr14:70838554-70843278   | 20.48309667 | 8.314863333 |
| Tomm5     | chr4:45118081-45120985    | 20.48203333 | 10.20921333 |
| Ccdc25    | chr14:66456138-66485441   | 20.46503333 | 16.46794667 |
| Myst4     | chr14:22318991-22491700   | 20.46373333 | 18.7793     |
| Gm6402    | chr17:30531769-30533125   | 20.45233333 | 19.37456667 |
| Rsph3b    | chr17:7109064-7152705     | 20.44536667 | 13.24468667 |
| Pinx1     | chr14:64479148-64538696   | 20.43913333 | 8.031346667 |
| St6gal1   | chr16:23224812-23360423   | 20.428      | 5.11011     |
| Dcaf6     | chr1:167259631-167390594  | 20.42386667 | 19.09203333 |
| Rbm47     | chr5:66407795-66543163    | 20.42226667 | 19.55796667 |
| Thumpd3   | chr6:112996320-113018267  | 20.4184     | 14.01060333 |
| Me2       | chr18:73929693-73975046   | 20.40473333 | 29.02916667 |
| Brd3      | chr2:27301100-27331193    | 20.39673333 | 19.0507     |
| Jagn1     | chr6:113392510-113398223  | 20.39556    | 24.59843333 |
| Rabep1    | chr11:70658264-70756607   | 20.3929     | 14.53713333 |
| Rab2b     | chr14:52881433-52899070   | 20.39166667 | 28.52615667 |
| Napg      | chr18:63137569-63159104   | 20.38436667 | 13.58070667 |
| Inhbb     | chr1:121312041-121318825  | 20.37653333 | 8.81479     |
| Ric3      | chr7:116177832-116226838  | 20.37403333 | 16.0442     |
| Abcf2     | chr5:24071158-24083285    | 20.3669     | 9.890453333 |
| Arl15     | chr13:114584715-114947669 | 20.36096667 | 13.9322     |
| Fgf14     | chr14:124377512-125076349 | 20.3597     | 51.68936667 |
| Fam160b2  | chr14:70983101-70999642   | 20.35943333 | 26.07166667 |
| Slc35f5   | chr1:127457592-127492261  | 20.35476667 | 29.32466667 |
| Slc38a1   | chr15:96401848-96473344   | 20.35456667 | 21.01331333 |
| Pcbd1     | chr10:60552090-60557077   | 20.35162    | 38.305      |
| Taf1d     | chr9:15110657-15121441    | 20.34236667 | 32.2341     |
| Trp63     | chr16:25683850-25892174   | 20.34165667 | 33.31633333 |
| Sepx1     | chr17:24873586-24879723   | 20.3401     | 32.3417     |
| Abhd12    | chr2:150658250-150730467  | 20.33883333 | 22.2557     |
| Dnajc13   | chr9:104053926-104165260  | 20.3299     | 14.87303333 |
| Pip4k2c   | chr10:126634122-126648678 | 20.32756667 | 17.7325     |
| Slc27a1   | chr8:74092825-74110607    | 20.32486667 | 24.58283333 |
| Klf9      | chr19:23215715-23241401   | 20.32283333 | 21.1386     |
| D10Wsu52e | chr10:85401381-85420538   | 20.32138333 | 25.4001     |
| Hdac3     | chr18:38096624-38114642   | 20.3172     | 22.79326667 |
| Ppfia4    | chr1:136193359-136229505  | 20.31526667 | 7.349313333 |
| Sharpin   | chr15:76177469-76181540   | 20.3142     | 26.73263667 |
| Higd1a    | chr9:121757677-121767118  | 20.31316667 | 22.85564    |
| Mrps22    | chr9:98489149-98502098    | 20.30776667 | 6.26191     |
| Mbd3      | chr10:79855285-79862224   | 20.30723333 | 18.1569     |

|               |                           |             |             |
|---------------|---------------------------|-------------|-------------|
| Plk1s1        | chr2:146681624-146795825  | 20.30676667 | 19.75763333 |
| Tctex1d2      | chr16:32419787-32428978   | 20.30423333 | 22.73922    |
| Id2           | chr12:25778663-25780957   | 20.30193333 | 106.5992333 |
| Mapk1ip1l     | chr14:47917988-47942766   | 20.294      | 18.7309     |
| Slc12a6       | chr2:112106470-112203320  | 20.2919     | 20.02703333 |
| Jmy           | chr13:94200051-94269763   | 20.28373333 | 23.47996667 |
| Gm4952        | chr19:12674473-12702106   | 20.28266667 | 0           |
| Taf9b         | chrX:103402212-103416497  | 20.2754     | 26.57366667 |
| Stox1         | chr10:62122169-62188847   | 20.27293333 | 18.06974333 |
| 3110040N11Rik | chr7:88927072-88934339    | 20.2696     | 19.15906667 |
| Kif16b        | chr2:142444080-142727200  | 20.26643333 | 18.54416667 |
| Capn5         | chr7:105270074-105326703  | 20.25056667 | 17.36786667 |
| Zfp869        | chr8:72229036-72240801    | 20.24345667 | 16.03275333 |
| Tmem106b      | chr6:13019758-13039269    | 20.24323333 | 17.55996667 |
| Myzap         | chr9:71352153-71440167    | 20.23766667 | 5.385516667 |
| Bub3          | chr7:138703904-138715412  | 20.23566667 | 29.9007     |
| Pex7          | chr10:19579895-19627480   | 20.21273333 | 23.1147     |
| Pkn2          | chr3:142453865-142544968  | 20.20003333 | 19.64       |
| Sucla2        | chr14:73952592-73995949   | 20.18856667 | 27.22323333 |
| Mrpl12        | chr11:120345982-120350068 | 20.17762667 | 7.590233333 |
| Ilgae         | chr11:72904096-72960951   | 20.17483333 | 5.08262     |
| Oasl2         | chr5:115346942-115362254  | 20.17406667 | 9.3597      |
| Krt24         | chr11:99141406-99146552   | 20.17154    | 92.1285     |
| Serf2         | chr2:121274963-121279162  | 20.16436667 | 23.74048    |
| Gtf3a         | chr5:147760232-147767190  | 20.1611     | 14.99520667 |
| Acox3         | chr5:35925708-35956450    | 20.16023333 | 7.833843333 |
| Rassf7        | chr7:148401758-148404557  | 20.155      | 9.825676667 |
| 1500003O03Rik | chr2:119373442-119412758  | 20.1422     | 45.12663333 |
| Eif2c1        | chr4:126112256-126145665  | 20.13956667 | 30.35873333 |
| Pmpca         | chr2:26244867-26252641    | 20.1329     | 65.56546667 |
| Ssr1          | chr13:38063269-38086059   | 20.13013333 | 23.3194     |
| Ndufb4        | chr16:37647687-37654454   | 20.12553333 | 25.22336667 |
| Cbx5          | chr15:103021976-103070247 | 20.12103333 | 26.77436667 |
| Cdc14a        | chr3:115975470-116126950  | 20.1166     | 18.28023333 |
| Crebzf        | chr7:97591290-97596229    | 20.1134     | 13.62380667 |
| Pard3         | chr8:129587955-130136186  | 20.11286667 | 23.53506667 |
| Chuk          | chr19:44147823-44181967   | 20.1118     | 13.62647667 |
| Zfp191        | chr18:24170767-24179272   | 20.10643333 | 29.46606667 |
| Prkag1        | chr15:98643227-98661939   | 20.10443333 | 21.10137333 |
| Ralgds        | chr2:28368686-28408602    | 20.10156667 | 25.11273333 |
| Ttll7         | chr3:146515330-146645714  | 20.09613333 | 16.57166667 |
| Tbc1d5        | chr17:50872451-51318674   | 20.09033333 | 12.29839    |
| Esd           | chr14:75132151-75150250   | 20.08743333 | 37.1352     |
| Cog6          | chr3:52786044-52821145    | 20.0795     | 18.43913333 |
| Clasp2        | chr9:113650590-113828815  | 20.07566667 | 19.4273     |
| Mpp5          | chr12:79849933-79941700   | 20.07106667 | 19.66083333 |
| Zc3hav1       | chr6:38260496-38304603    | 20.05716667 | 13.85208667 |
| BC017158      | chr7:135414892-135441645  | 20.05259    | 6.687156667 |
| Mboat2        | chr12:25516463-25645164   | 20.05253333 | 16.72955    |
| Rnf187        | chr11:58745789-58752408   | 20.0428     | 24.22343333 |
| Tbc1d20       | chr2:152119607-152138326  | 20.03226667 | 9.316133333 |
| Dmtf1         | chr5:9118867-9161776      | 20.02946667 | 32.6773     |



|               |                           |             |             |
|---------------|---------------------------|-------------|-------------|
| Tmem134       | chr19:4125959-4132307     | 20.02133333 | 27.52453333 |
| Insig2        | chr1:123200929-123229157  | 20.019      | 28.77356667 |
| Mfn1          | chr3:32428403-32478147    | 20.01813333 | 25.29623333 |
| Cyb5r4        | chr9:86916863-86972609    | 20.01366667 | 10.85428333 |
| Scyl2         | chr10:89102851-89149030   | 19.99726667 | 35.1051     |
| Stk4          | chr2:163899913-163981257  | 19.99146667 | 26.80193333 |
| Jund          | chr8:73221637-73224515    | 19.98646667 | 25.44246667 |
| Tgif1         | chr17:71193544-71202872   | 19.9854     | 34.40266667 |
| Slc25a37      | chr14:69859907-69903160   | 19.9838     | 21.9745     |
| 4933417O13Rik | chr7:150508676-150516555  | 19.97687    | 16.46068333 |
| Caml          | chr13:55724365-55733777   | 19.96906667 | 43.52043333 |
| Chtf8         | chr8:109407762-109417493  | 19.9631     | 22.39356667 |
| Ptprg         | chr14:12386066-13074553   | 19.96166667 | 9.11887     |
| Fktn          | chr4:53727053-53776143    | 19.94933333 | 24.059      |
| Fam3c         | chr6:22256521-22306081    | 19.9464     | 21.66488    |
| Fam133b       | chr5:3543832-3570546      | 19.94536667 | 9.803176667 |
| 8430410A17Rik | chr6:87863969-87886607    | 19.9439     | 39.12896667 |
| Nhp2          | chr11:51433274-51437216   | 19.9306     | 9.78758     |
| Nmi           | chr2:51804018-51828728    | 19.93019    | 13.86016667 |
| Ift52         | chr2:162843207-162871871  | 19.92833333 | 15.46036667 |
| Scamp2        | chr9:57408750-57436605    | 19.9227     | 15.1156     |
| C1galt1       | chr6:7795223-7822042      | 19.90673333 | 14.9838     |
| Gmpr2         | chr14:56291071-56297588   | 19.8985     | 19.69216333 |
| Ogfrl1        | chr1:23373262-23390014    | 19.87206667 | 17.6913     |
| Zc3h4         | chr7:16986544-17023045    | 19.86713333 | 22.0741     |
| Gna11         | chr10:80991476-81007791   | 19.8664     | 21.7043     |
| Fam179a       | chr17:72022600-72079009   | 19.8648     | 9.096016667 |
| Xrcc6bp1      | chr10:126305483-126338427 | 19.863      | 16.31509667 |
| Tmem38a       | chr8:75096001-75111183    | 19.8504     | 40.83763333 |
| Tmem55b       | chr14:51545744-51550524   | 19.83776667 | 16.09040367 |
| Ilf2          | chr3:90280122-90292301    | 19.83733333 | 43.72116667 |
| Gpld1         | chr13:25035020-25083805   | 19.83306667 | 13.85018333 |
| Pkig          | chr2:163484121-163551894  | 19.82426667 | 12.56682333 |
| Tmprss4       | chr9:44980808-45012158    | 19.82423333 | 20.50363    |
| Sox4          | chr13:29042598-29045551   | 19.82336667 | 20.0256     |
| Hmgb2         | chr8:59990639-59994796    | 19.8196     | 13.7857     |
| Pvrl4         | chr1:173300303-173318418  | 19.8171     | 25.75683333 |
| Bms1          | chr6:118333398-118369435  | 19.80996667 | 14.63033333 |
| Pacrg         | chr17:10595877-11033057   | 19.787      | 6.738273333 |
| Snx18         | chr13:114382386-114408772 | 19.7676     | 17.47863333 |
| Stam2         | chr2:52547724-52601183    | 19.7645     | 21.02423333 |
| Gm5643        | chrX:138732047-138733780  | 19.75636667 | 26.24346667 |
| Mrpl34        | chr8:73988824-73989652    | 19.74683    | 37.681      |
| Gfpt1         | chr6:86992839-87042201    | 19.74556667 | 34.11316667 |
| Dsc3          | chr18:20119430-20160598   | 19.7446     | 86.24293333 |
| Cbx6          | chr15:79654327-79664763   | 19.73783333 | 21.23956667 |
| Golim4        | chr3:75680305-75760753    | 19.737      | 35.96036667 |
| Mrps18a       | chr17:46247952-46265857   | 19.73432333 | 15.20216667 |
| Hif1a         | chr12:75008853-75048517   | 19.73316667 | 21.59193333 |
| Pcdhb17       | chr18:37644674-37647944   | 19.7265     | 18.69143333 |
| Mysm1         | chr4:94608731-94645791    | 19.722      | 19.64313333 |
| Ccdc127       | chr13:74487764-74503231   | 19.71996667 | 14.29260667 |

|               |                           |             |             |
|---------------|---------------------------|-------------|-------------|
| Osbp          | chr19:12040333-12068604   | 19.7142     | 21.45123333 |
| Kif21a        | chr15:90763706-90880379   | 19.71413333 | 28.73573333 |
| Vps16         | chr2:130250055-130270005  | 19.70996667 | 13.0682     |
| Atp9a         | chr2:168459937-168567300  | 19.7083     | 6.35373     |
| Nop14         | chr5:34981184-35002797    | 19.70586667 | 14.16713333 |
| Fbxl20        | chr11:97943867-98010930   | 19.6995     | 17.3038     |
| Wdr11         | chr7:136735376-136779252  | 19.68653333 | 17.9132     |
| Epc2          | chr2:49307005-49407129    | 19.67853333 | 21.39113333 |
| Bcor          | chrX:11613863-11737481    | 19.6734     | 25.56286667 |
| 2210021J22Rik | chr15:85637401-85642127   | 19.66866667 | 23.482      |
| Ip6k1         | chr9:107904978-107951113  | 19.66456667 | 9.53743     |
| Zfp426        | chr9:20272992-20297190    | 19.6389     | 26.37976667 |
| Rfwd2         | chr1:161162456-161277711  | 19.6361     | 13.214      |
| 2010012O05Rik | chr19:46764395-46777872   | 19.62036667 | 15.63576333 |
| Asb8          | chr15:97965070-97996009   | 19.60213333 | 12.29106    |
| Maea          | chr5:33678220-33715943    | 19.60053333 | 25.52666667 |
| Phrf1         | chr7:148414686-148448650  | 19.58879    | 16.13543333 |
| Mrpl49        | chr19:6053629-6057751     | 19.58476667 | 27.1584     |
| Limk2         | chr11:3243299-3309238     | 19.5795     | 23.79106667 |
| Vps37a        | chr8:41597136-41636488    | 19.57763333 | 23.79336667 |
| Golph3l       | chr3:95392855-95423169    | 19.57666667 | 13.56036333 |
| Galnt14       | chr17:73843090-74059791   | 19.5758     | 0.014904    |
| Lonp1         | chr17:56753721-56766326   | 19.57573333 | 12.86206333 |
| Smc4          | chr3:68808893-68838545    | 19.57023333 | 20.87836667 |
| 4933434E20Rik | chr3:89856738-89866369    | 19.55723333 | 16.31566667 |
| Rbl2          | chr8:93593992-93647743    | 19.53193333 | 16.97973333 |
| Cenpq         | chr17:41060003-41071500   | 19.52626    | 11.52947333 |
| Isg20         | chr7:86058650-86065282    | 19.52517333 | 31.04926667 |
| Tmem203       | chr2:25110958-25111872    | 19.5223     | 10.11442667 |
| Bnip1         | chr17:26918023-26929466   | 19.51736667 | 9.060377667 |
| Alkbh7        | chr17:57136761-57138759   | 19.51686333 | 13.27225    |
| Lmf1          | chr17:25716118-25799771   | 19.51137333 | 12.20154    |
| Tspo          | chr15:83394002-83404633   | 19.50859333 | 35.19586667 |
| Ncoa4         | chr14:32973077-32992549   | 19.50593333 | 21.85823333 |
| Slc35c1       | chr2:92292921-92300675    | 19.50293333 | 11.81652667 |
| Grb7          | chr11:98308147-98316687   | 19.49263333 | 60.5012     |
| Bet1          | chr6:4026903-4036927      | 19.4925     | 14.67192333 |
| P2ry2         | chr7:108145085-108160505  | 19.49163333 | 3.874313333 |
| Phax          | chr18:56722222-56747366   | 19.48633333 | 19.7314     |
| Ncoa7         | chr10:30365387-30522913   | 19.4721     | 11.1856     |
| Ptcd2         | chr13:100089603-100114633 | 19.45453333 | 12.16841333 |
| Dlg5          | chr14:24953174-25065142   | 19.45193333 | 22.186      |
| B230208H17Rik | chr2:25438537-25463966    | 19.44996667 | 15.9843     |
| Rn4.5s        | chr6:47613580-47613754    | 19.44773    | 32.8308     |
| Tbc1d15       | chr10:114634926-114688549 | 19.4467     | 14.28081    |
| Gatad2a       | chr8:72430967-72520278    | 19.4333     | 31.58296667 |
| Mtx3          | chr13:93614741-93628185   | 19.42736667 | 8.646866667 |
| Jhdm1d        | chr6:39086618-39156772    | 19.4157     | 23.37953333 |
| Tbk1          | chr10:120983512-121023850 | 19.4124     | 13.92874333 |
| Sgpl1         | chr10:60561389-60610413   | 19.4082     | 15.77508    |
| Sbf1          | chr15:89118666-89145742   | 19.40513333 | 14.97849    |
| Gde1          | chr7:125832071-125849252  | 19.40326667 | 28.58786667 |

|               |                           |             |             |
|---------------|---------------------------|-------------|-------------|
| Stx3          | chr19:11849607-11893893   | 19.4029     | 16.45913    |
| Mcc           | chr18:44584713-44971836   | 19.39453333 | 20.77293333 |
| Mpv17         | chr5:31443033-31456615    | 19.3913     | 23.86386667 |
| Mmp14         | chr14:55050440-55060095   | 19.38673333 | 24.97426667 |
| Myo1b         | chr1:51806609-51972818    | 19.3781     | 3.39046     |
| Tmem170       | chr8:114388797-114400575  | 19.36716667 | 10.81519667 |
| 5031425E22Rik | chr5:22937625-22940171    | 19.35983333 | 8.607343333 |
| Glod4         | chr11:76033896-76057201   | 19.35676667 | 18.6236     |
| Atp13a3       | chr16:30312509-30388616   | 19.3539     | 28.50263333 |
| Fam177a       | chr12:56225514-56243069   | 19.34496667 | 13.35148    |
| Mrpl13        | chr15:55365649-55388867   | 19.33606667 | 29.85243333 |
| Cox15         | chr19:43807743-43827490   | 19.33323333 | 13.21842    |
| Mmgt2         | chr11:62462165-62479861   | 19.33126667 | 20.55396667 |
| Zdhhc13       | chr7:56044372-56082807    | 19.3298     | 16.61986667 |
| Glrx3         | chr7:144629330-144660277  | 19.32616667 | 15.69005333 |
| Chmp1a        | chr8:125728160-125736688  | 19.3244     | 16.37108667 |
| Alg11         | chr8:23171192-23182099    | 19.32436667 | 10.41174667 |
| Vcpip1        | chr1:9713277-9738463      | 19.3235     | 17.73254    |
| D14Ert449e    | chr14:27022152-27026527   | 19.32193333 | 26.97926667 |
| Rab22a        | chr2:173485345-173527683  | 19.31883333 | 38.34855333 |
| Rnf11         | chr4:109125461-109149110  | 19.3029     | 16.11968333 |
| Esco1         | chr18:10566509-10610350   | 19.29136667 | 10.68831333 |
| Cldn23        | chr8:36887762-36889613    | 19.2783     | 5.63376     |
| Epm2aip1      | chr9:111174348-111181595  | 19.27756667 | 17.87013333 |
| Epha4         | chr1:77363759-77511663    | 19.27183333 | 12.80246667 |
| Six4          | chr12:74201245-74214232   | 19.2717     | 44.67383333 |
| Fgd5          | chr6:91937103-92025999    | 19.26423333 | 7.271076667 |
| Tmem5         | chr10:121518315-121534158 | 19.25766333 | 12.15469667 |
| Cnot6l        | chr5:96504756-96591009    | 19.25396667 | 43.39133333 |
| Zfx           | chrX:91319969-91368746    | 19.25173333 | 14.33054333 |
| Cry2          | chr2:92243803-92274226    | 19.24913333 | 23.09129    |
| Zfand5        | chr19:21346767-21361330   | 19.24853333 | 26.87693333 |
| H13           | chr2:152495196-152534404  | 19.2457     | 23.83836667 |
| Mrps5         | chr2:127413161-127429722  | 19.2325     | 7.9125      |
| Sreb2         | chr15:81977698-82035390   | 19.23123333 | 29.31416667 |
| 5730408K05Rik | chr19:8962876-8963260     | 19.22926667 | 1.536715333 |
| Vps52         | chr17:34092826-34103433   | 19.2285     | 16.82723    |
| 4-Mar         | chr19:37282034-37298947   | 19.218      | 31.2491     |
| Rbmxl1        | chr8:81029167-81032827    | 19.21486667 | 22.68203333 |
| Rab23         | chr1:33776740-33799409    | 19.20863333 | 9.8956      |
| Cops7b        | chr1:88483674-88503075    | 19.20647    | 18.68766667 |
| Lyar          | chr5:38611720-38625545    | 19.201      | 13.13568333 |
| Hdac11        | chr6:91106808-91124677    | 19.19033333 | 26.62586667 |
| Atxn7         | chr14:14845004-14939815   | 19.18663333 | 15.08373667 |
| Pla2g12a      | chr3:129581539-129598739  | 19.18616    | 7.87735     |
| Sav1          | chr12:71065998-71087989   | 19.18188667 | 10.04252333 |
| Zer1          | chr2:29952802-29979974    | 19.18       | 15.25663333 |
| Slc25a16      | chr10:62383380-62409242   | 19.17726667 | 13.28450667 |
| Bbx           | chr16:50191956-50432502   | 19.16693333 | 17.81236667 |
| Cdk19         | chr10:40069113-40203624   | 19.13666667 | 18.66073    |
| Eml4          | chr17:83750270-83879699   | 19.13396667 | 15.29606667 |
| Ppargc1a      | chr5:51845487-51945160    | 19.1258     | 5.673566667 |

|               |                           |             |             |
|---------------|---------------------------|-------------|-------------|
| Vps33b        | chr7:87414540-87436465    | 19.1074     | 19.81913    |
| Chd1          | chr17:15841930-15909576   | 19.0957     | 15.17033333 |
| Baz1a         | chr12:55993975-56087323   | 19.08106333 | 18.7027     |
| Kdm5c         | chrX:148667772-148708897  | 19.06626667 | 23.7789     |
| Nudt16        | chr9:105031667-105034135  | 19.0605     | 21.06771667 |
| Zfp110        | chr7:13420158-13435933    | 19.05316667 | 12.51319667 |
| 1810030007Rik | chrX:12232009-12250672    | 19.0487     | 15.37196667 |
| Tek           | chr4:94405990-94541630    | 19.04833333 | 10.37455    |
| Lphn1         | chr8:86423996-86465853    | 19.04826667 | 47.18906667 |
| Mat2b         | chr11:40492815-40508705   | 19.04306667 | 25.2854     |
| Cggbp1        | chr16:64851910-64859317   | 19.03866667 | 27.98876667 |
| Itch          | chr2:154959216-155052591  | 19.03143333 | 28.20186667 |
| Ccdc66        | chr14:28295595-28321646   | 19.01776667 | 6.827673333 |
| Abcf3         | chr16:20548675-20561676   | 19.01503333 | 9.039123333 |
| Ehd1          | chr19:6276895-6300096     | 18.9971     | 16.356      |
| Suds3         | chr5:117541688-117566002  | 18.98963333 | 14.94152333 |
| Mospd3        | chr5:138037874-138042268  | 18.98566667 | 20.69946667 |
| Eif2b2        | chr12:86560462-86567578   | 18.98013333 | 21.82692333 |
| Reep6         | chr10:79792889-79799186   | 18.97551333 | 24.07006667 |
| Fam177a       | chr12:56300578-56318133   | 18.9712     | 12.89767    |
| Slc31a1       | chr4:62021734-62052803    | 18.96663333 | 30.32003333 |
| Cldn12        | chr5:5505014-5514976      | 18.96596333 | 10.93913667 |
| Akt1          | chr12:113892031-113912487 | 18.96053333 | 19.5929     |
| Mtmr12        | chr15:12134848-12201995   | 18.9553     | 15.26793333 |
| Rsph3a        | chr17:8138478-8172421     | 18.95346667 | 13.45346    |
| Usp40         | chr1:89841695-89905126    | 18.95253333 | 23.9864     |
| Zc3h12c       | chr9:51920089-51976216    | 18.95046667 | 33.46603333 |
| 2700062C07Rik | chr18:24629371-24636268   | 18.94691    | 15.2935     |
| Siah1a        | chr8:89247836-89269905    | 18.94303333 | 17.72467667 |
| Zfp598        | chr17:24806696-24818961   | 18.943      | 25.7982     |
| Fam89b        | chr19:5728086-5729666     | 18.94246667 | 41.0196     |
| Tmem183a      | chr1:136242673-136258576  | 18.9364     | 27.35386667 |
| Pcdhga5       | chr18:37854154-38001524   | 18.93393333 | 11.04988    |
| Pou6f1        | chr15:100405748-100416796 | 18.93016    | 10.29990333 |
| Lactb2        | chr1:13615979-13650590    | 18.9207     | 11.95976    |
| Pdap1         | chr5:145889638-145900958  | 18.91413333 | 22.20396667 |
| Mib1          | chr18:10725622-10812215   | 18.9098     | 15.42063333 |
| Tiparp        | chr3:65332368-65359440    | 18.9092     | 37.77843333 |
| Mrpl17        | chr7:112952295-112959601  | 18.90672    | 5.758193333 |
| Vmac          | chr17:56853354-56857122   | 18.8895     | 9.328686667 |
| Folr2         | chr7:108988501-108993845  | 18.88796667 | 1.339261333 |
| Tmx1          | chr12:71554140-71568611   | 18.8876     | 24.1208     |
| Ddr1          | chr17:35818511-35841084   | 18.88703333 | 25.1747     |
| Cpd           | chr11:76590709-76660510   | 18.886      | 17.64162333 |
| Pigs          | chr11:78141923-78156278   | 18.88353667 | 27.95443333 |
| Chchd7        | chr4:3866034-3870672      | 18.87829333 | 13.90617333 |
| Pir           | chrX:160707362-160810945  | 18.87383333 | 22.09072667 |
| Alox5         | chr6:116360088-116411196  | 18.87207    | 10.28764333 |
| Prss53        | chr7:135028957-135034484  | 18.87066667 | 5.397116667 |
| Flot2         | chr11:77851442-77873934   | 18.8614     | 15.01876667 |
| Akap13        | chr7:82600419-82899495    | 18.8613     | 22.56946667 |
| Elmo3         | chr8:107829500-107834523  | 18.8605     | 22.27066667 |

|               |                           |             |             |
|---------------|---------------------------|-------------|-------------|
| 1810019J16Rik | chr4:133074877-133086705  | 18.85876667 | 27.32166667 |
| Gabpb1        | chr2:126454648-126501223  | 18.84913333 | 39.68513333 |
| Mafg          | chr11:120489666-120494861 | 18.8386     | 21.56136667 |
| Alox12b       | chr11:68970573-68983293   | 18.83316667 | 44.41963333 |
| Mrps31        | chr8:23521811-23540137    | 18.8311     | 27.49356667 |
| Zyg11b        | chr4:107900359-107973695  | 18.82553333 | 20.2397     |
| Reep3         | chr10:66471936-66559736   | 18.82326667 | 23.69126667 |
| D6Wsu116e     | chr6:116158050-116212689  | 18.8202     | 23.18443333 |
| Trappc4       | chr9:44211841-44215631    | 18.8199     | 26.24362    |
| Man2b2        | chr5:37198051-37221888    | 18.81943333 | 21.56203333 |
| Nhsl1         | chr10:18127480-18253697   | 18.81003333 | 12.4411     |
| 6430527G18Rik | chr12:88221652-88225764   | 18.80486667 | 15.8742     |
| Sars          | chr3:108227781-108248177  | 18.80213333 | 12.53339    |
| Urod          | chr4:116662821-116666980  | 18.79806667 | 56.6725     |
| D14Ertd449e   | chr14:26742783-26747158   | 18.78876667 | 27.08793333 |
| Pggt1b        | chr18:46399602-46440504   | 18.7859     | 18.15706667 |
| Cnpy3         | chr17:46872661-46889161   | 18.785      | 22.0466     |
| Nudt4         | chr10:95009640-95026801   | 18.78493333 | 36.9002     |
| Cbr4          | chr8:63966530-63982297    | 18.78483333 | 17.94368667 |
| Smg6          | chr11:74739373-74977950   | 18.77856667 | 24.45676667 |
| Lrrc61        | chr6:48504797-48520721    | 18.77576667 | 26.60293333 |
| Zfp217        | chr2:169934142-169968175  | 18.7723     | 16.86526667 |
| Snupn         | chr9:56798730-56831006    | 18.7671     | 5.809482667 |
| Nr1h2         | chr7:51805002-51809293    | 18.75868333 | 16.76418333 |
| Plekhg3       | chr12:77634546-77680026   | 18.75496667 | 21.1058     |
| Gnptab        | chr10:87842156-87910074   | 18.75373333 | 26.29436667 |
| Rnf113a1      | chrX:34731337-34732460    | 18.7528     | 0.227528    |
| Zdhhc3        | chr9:122981427-123022323  | 18.748      | 14.51979667 |
| Soat1         | chr1:158358238-158404459  | 18.74263333 | 13.36220667 |
| Clpx          | chr9:65142101-65178465    | 18.73503333 | 19.15126667 |
| 9130401M01Rik | chr15:57853826-57865849   | 18.7343     | 10.11847667 |
| Dennd4a       | chr9:64658817-64767474    | 18.7328     | 4.875593333 |
| Rapgef6       | chr11:54336346-54512788   | 18.7156     | 25.8409     |
| Ctnnbl1       | chr2:157563136-157717639  | 18.71526667 | 18.99236667 |
| Tdrd7         | chr4:46000333-46047631    | 18.71413333 | 10.2389     |
| Kif13a        | chr13:46844456-47025087   | 18.7134     | 22.1361     |
| Tmem14a       | chr1:21208711-21220248    | 18.71315333 | 11.28270667 |
| Zfp644        | chr5:107045759-107125849  | 18.71163333 | 36.36853333 |
| Bend7         | chr2:4638876-4723192      | 18.70766667 | 6.048163333 |
| Sdf2l1        | chr16:17130230-17132476   | 18.70660333 | 36.3542     |
| Pomt2         | chr12:88447815-88488852   | 18.7024     | 12.727711   |
| Zdhhc17       | chr10:110378835-110447122 | 18.6978     | 12.32422667 |
| Zcchc14       | chr8:124122602-124175833  | 18.69656667 | 16.07293333 |
| Gspt1         | chr16:11216333-11254418   | 18.69126667 | 20.3486     |
| Adam10        | chr9:70526807-70628036    | 18.6837     | 41.06446667 |
| Dcp1a         | chr14:31292750-31340242   | 18.6774     | 16.74993333 |
| Al837181      | chr19:5425143-5427316     | 18.67631667 | 20.34347    |
| Arhgef38      | chr3:132822494-132897853  | 18.6721     | 27.30493333 |
| Med22         | chr2:26760786-26766162    | 18.66263333 | 15.28693333 |
| Micu1         | chr10:59165382-59326870   | 18.6547     | 7.433916667 |
| Rbbp9         | chr2:144368000-144376595  | 18.648      | 14.79481    |
| Erc1          | chr6:119520813-119798168  | 18.63333333 | 22.38123333 |

|               |                           |             |             |
|---------------|---------------------------|-------------|-------------|
| Lzic          | chr4:148859441-148870776  | 18.63234    | 18.73263333 |
| Ccnc          | chr4:21654849-21677693    | 18.6312     | 15.55503333 |
| 2810004N23Rik | chr8:127363254-127386929  | 18.62936667 | 24.4777     |
| Hist1h4c      | chr13:23790006-23790318   | 18.61883333 | 3.46855     |
| Trappc5       | chr8:3676476-3680921      | 18.61646667 | 12.96453667 |
| Jak2          | chr19:29326317-29387570   | 18.60703333 | 22.3761     |
| Sash1         | chr10:8442016-8605868     | 18.6043     | 13.17586667 |
| Cbx4          | chr11:118938884-118947551 | 18.5956     | 15.76733333 |
| Hras1         | chr7:148375832-148379903  | 18.5935     | 34.63681333 |
| Ngly1         | chr14:17081827-17144440   | 18.59296667 | 19.42553333 |
| 1810026J23Rik | chr9:21397165-21400414    | 18.5861     | 21.74053333 |
| Rn4.5s        | chr6:47635201-47635375    | 18.58503    | 31.23383333 |
| Zfp369        | chr13:65380161-65399103   | 18.58236667 | 15.1714     |
| Hmg20a        | chr9:56266652-56344743    | 18.5746     | 23.9877     |
| Pcdhga3       | chr18:37833988-38001526   | 18.5723     | 11.32037333 |
| Slc1a5        | chr7:17366694-17383623    | 18.57039    | 29.61443333 |
| Dgka          | chr10:128157191-128181112 | 18.56656    | 27.58983333 |
| Pon2          | chr6:5214623-5248373      | 18.5567     | 20.25779333 |
| 1810020D17Rik | chr7:104698840-104728007  | 18.54867    | 13.59918667 |
| Dym           | chr18:75178425-75446620   | 18.5467     | 15.85078667 |
| 1700106N22Rik | chr17:85490039-85857920   | 18.54443367 | 12.33619333 |
| 4933426M11Rik | chr12:81891518-81981820   | 18.54236667 | 13.51151667 |
| Dlat          | chr9:50442737-50467885    | 18.54033333 | 22.8329     |
| Prkar2a       | chr9:108594473-108651842  | 18.54013333 | 17.99173333 |
| Heatr2        | chr5:139626176-139662459  | 18.53553333 | 10.79967667 |
| Polr2k        | chr15:36103771-36106767   | 18.5264     | 22.37080333 |
| Ythdf1        | chr2:180639081-180655641  | 18.52377    | 22.74166667 |
| 8030462N17Rik | chr18:77872019-77952749   | 18.52336667 | 11.46966333 |
| Ascl1         | chr10:86953785-86956405   | 18.52311    | 15.7193     |
| Evl           | chr12:109792929-109926725 | 18.52006667 | 19.88823333 |
| Rars2         | chr4:34562206-34607416    | 18.51466667 | 11.65473333 |
| D15Ertd621e   | chr15:58247022-58289356   | 18.5108     | 25.26516667 |
| Ctxn1         | chr8:4257645-4259274      | 18.49463333 | 40.8174     |
| Kcnj11        | chr7:53352492-53356134    | 18.49106667 | 11.73010667 |
| Dennd4c       | chr4:86394458-86496506    | 18.48646667 | 24.1134     |
| Dazap1        | chr10:79727735-79751158   | 18.48134667 | 13.571      |
| 4930420K17Rik | chr5:9100736-9118983      | 18.47294333 | 8.57707     |
| Fam83b        | chr9:76338511-76393611    | 18.44622333 | 45.629      |
| Ngfr          | chr11:95430139-95449012   | 18.44283333 | 18.23006667 |
| Elovl5        | chr9:77765171-77832326    | 18.44213333 | 22.5814     |
| Fbxl5         | chr5:44135856-44173388    | 18.4404     | 19.42446667 |
| Tmem20        | chr19:38470469-38480097   | 18.43743333 | 15.9657     |
| D14Ertd449e   | chr14:26882536-26886911   | 18.43013333 | 26.9744     |
| Phka1         | chrX:99709313-99839585    | 18.42683333 | 11.62817333 |
| Arhgef11      | chr3:87422672-87541955    | 18.42283333 | 11.77055    |
| Cacnb3        | chr15:98462650-98474961   | 18.42023333 | 30.8384     |
| Eif4e3        | chr6:99575130-99616765    | 18.40566667 | 11.05564333 |
| Rp9           | chr9:22252755-22272800    | 18.39796667 | 12.87202    |
| Fosl2         | chr5:32438844-32460212    | 18.3976     | 53.7777     |
| Synj1         | chr16:90936341-91011553   | 18.39106667 | 17.1804     |
| Itih5         | chr2:10075169-10178156    | 18.38733333 | 0.3323632   |
| Snora3        | chr7:116663645-116663765  | 18.38723333 | 214.3323333 |

|               |                           |             |             |
|---------------|---------------------------|-------------|-------------|
| Glce          | chr9:61905055-61918413    | 18.37403333 | 15.72403333 |
| Fbxo38        | chr18:62663712-62708397   | 18.36956667 | 13.64966667 |
| Surf2         | chr2:26771940-26775690    | 18.36736667 | 12.76310667 |
| Cetn2         | chrX:70158903-70163683    | 18.35807333 | 22.03086667 |
| Setx          | chr2:28980511-29037991    | 18.35736667 | 25.95416667 |
| Nudt14        | chr12:114172943-114180329 | 18.35696667 | 19.70736667 |
| Golga5        | chr12:103707343-103736117 | 18.34623333 | 10.55436    |
| BC004004      | chr17:29405732-29439832   | 18.34303333 | 36.63876667 |
| Hs3st3b1      | chr11:63698194-63735786   | 18.33496667 | 26.38156667 |
| Ppp3r1        | chr11:17059300-17100383   | 18.30853333 | 35.34263333 |
| Tcp11l2       | chr10:84039691-84077100   | 18.30210333 | 25.90321667 |
| Rbck1         | chr2:152142069-152158375  | 18.29843333 | 11.52875667 |
| Bre           | chr5:32000422-32387112    | 18.29354    | 19.85606667 |
| Rassf1        | chr9:107453885-107464598  | 18.2922     | 9.887653333 |
| Ift57         | chr16:49699406-49765239   | 18.2918     | 17.98994667 |
| Prmt5         | chr14:55126018-55136307   | 18.2909     | 17.88436667 |
| Lrp4          | chr2:91297687-91354058    | 18.29073333 | 11.20631667 |
| Nat9          | chr11:115044145-115048630 | 18.28796667 | 7.703623333 |
| 1110001A16Rik | chr17:79315838-79320388   | 18.2854     | 7.42086     |
| Anapc1        | chr2:128435818-128513131  | 18.2756     | 13.50806667 |
| Csnk1g3       | chr18:54021766-54115338   | 18.26493333 | 14.68510333 |
| Rmnd1         | chr10:5914188-5943372     | 18.2649     | 13.30542    |
| Pdlim5        | chr3:141902548-142058660  | 18.26456667 | 35.08026667 |
| 2810453I06Rik | chr5:144309573-144325393  | 18.2625     | 19.10526667 |
| Rnf19a        | chr15:36169688-36212902   | 18.25886333 | 11.75728667 |
| 1200014J11Rik | chr11:72861368-72897081   | 18.2568     | 19.1912     |
| Hip1r         | chr5:124423636-124453224  | 18.25176667 | 15.8074     |
| Gdf15         | chr8:73153292-73155534    | 18.2478     | 1.060563333 |
| 4833428L15Rik | chr9:45224708-45239315    | 18.24545667 | 1.46589     |
| Smchd1        | chr17:71693833-71824683   | 18.24253333 | 14.90153333 |
| Fam134a       | chr1:75139359-75144483    | 18.24013333 | 25.64693333 |
| Coq10a        | chr10:127800152-127807093 | 18.23896667 | 14.66697    |
| Ube2d1        | chr10:70717727-70748010   | 18.23546667 | 39.5304     |
| C130022K22Rik | chr6:91828046-91849842    | 18.23393333 | 15.06123333 |
| Plekhd1       | chr11:103226405-103273978 | 18.23193333 | 22.5422     |
| Rae1          | chr2:172825617-172841240  | 18.22483333 | 23.05893333 |
| Kri1          | chr9:21077900-21092413    | 18.21936667 | 5.270276667 |
| Car11         | chr7:52955336-52960031    | 18.20833333 | 13.43079667 |
| Bin3          | chr14:70499951-70538013   | 18.1985     | 9.904316667 |
| Secisbp2l     | chr2:125562721-125608606  | 18.19806667 | 23.0172     |
| Pick1         | chr15:79059603-79079896   | 18.1934     | 19.01826667 |
| Ocln          | chr13:101267321-101322453 | 18.17813333 | 27.6817     |
| Cand1         | chr10:118635867-118677111 | 18.1751     | 19.82863333 |
| Cog5          | chr12:32339733-32622495   | 18.165      | 23.18533333 |
| Dtx3          | chr10:126627433-126632765 | 18.15856667 | 19.92406667 |
| Nfyb          | chr10:82211444-82226886   | 18.15313333 | 15.44423333 |
| Heca          | chr10:17620271-17667873   | 18.1437     | 9.732413333 |
| Nfil3         | chr13:53062577-53076408   | 18.1374     | 19.7445     |
| 2810432D09Rik | chr4:41659064-41660549    | 18.13727    | 13.50334    |
| Xpo5          | chr17:46339803-46379248   | 18.13353333 | 6.696276667 |
| Auts2         | chr5:131913551-133018213  | 18.12363333 | 21.8096     |
| Traf7         | chr17:24645794-24664883   | 18.1219     | 9.850063333 |

|               |                           |             |             |
|---------------|---------------------------|-------------|-------------|
| Rps6ka3       | chrX:155694051-155801417  | 18.11759    | 25.67733333 |
| Ly6g6e        | chr17:35213886-35215749   | 18.1169     | 25.91895    |
| Abi2          | chr1:60466462-60538007    | 18.11456667 | 21.95503333 |
| Gclm          | chr3:121948509-121969566  | 18.1086     | 18.08794667 |
| Irak1         | chrX:71259252-71269260    | 18.10363333 | 34.0023     |
| Leprot        | chr4:101320387-101331963  | 18.10263333 | 41.3629     |
| Hdgfrp2       | chr17:56219079-56240019   | 18.09683333 | 14.43519    |
| Trnt1         | chr6:106719131-106732468  | 18.08846667 | 19.94048    |
| Ier3          | chr17:35958657-35959856   | 18.08803333 | 32.4194     |
| Tbc1d8        | chr1:39428341-39535592    | 18.08233333 | 29.49913333 |
| Gdap10        | chr12:33508980-33511773   | 18.08121667 | 25.26931333 |
| Atg7          | chr6:114593118-114810632  | 18.07366667 | 17.85353333 |
| Maf1          | chr15:76181723-76184808   | 18.07016667 | 12.48562    |
| Rreb1         | chr13:37917906-38043874   | 18.0636     | 16.61573333 |
| Zfp949        | chr9:88442857-88465924    | 18.06036667 | 24.4118     |
| Vil1          | chr1:74455957-74482134    | 18.05616667 | 9.20753     |
| Npc1          | chr18:12348202-12394895   | 18.04396667 | 17.2673     |
| Wbscr27       | chr5:135408242-135418507  | 18.0393     | 15.46046667 |
| Fam178a       | chr19:45005608-45058277   | 18.03623333 | 15.47005    |
| Cwc22         | chr2:77733709-77784410    | 18.03403333 | 8.760996667 |
| Specc1l       | chr10:74674817-74775145   | 18.0331     | 21.7168     |
| Tmem43        | chr6:91423744-91438452    | 18.02926667 | 17.84256667 |
| 1700011E24Rik | chr17:87788910-87827081   | 18.01689333 | 8.235276667 |
| Clock         | chr5:76641201-76733573    | 18.01613333 | 26.78243333 |
| Rnf10         | chr5:115691778-115722904  | 18.01133333 | 23.68506667 |
| Wwp2          | chr8:109960297-110082495  | 18.01106667 | 13.19656667 |
| Tsc2          | chr17:24732881-24769574   | 18.0081     | 20.39146667 |
| Rbmx2         | chrX:46048180-46063896    | 18.0021     | 8.919243333 |
| Rp2h          | chrX:19941733-19977475    | 18.00173333 | 11.35856333 |
| Ehbp1         | chr11:21905828-22186798   | 18.00106667 | 11.14126333 |
| Rab8a         | chr8:74685098-74705265    | 17.99616667 | 20.194      |
| Eml2          | chr7:19766518-19791831    | 17.99162333 | 8.03426     |
| Ddx52         | chr11:83755591-83776588   | 17.99116    | 12.84197333 |
| Dnase1l1      | chrX:71518555-71527672    | 17.99096667 | 18.02453333 |
| Rwdd4a        | chr8:48618998-48638191    | 17.98807333 | 10.14197    |
| Rn4.5s        | chr6:47609240-47609414    | 17.98482333 | 30.89193333 |
| 1-Mar         | chr17:33822636-33855622   | 17.98141333 | 13.22934667 |
| Timm10        | chr2:84667177-84670370    | 17.98106333 | 14.86006667 |
| Ccdc9         | chr7:16859390-16872144    | 17.97923333 | 9.747936667 |
| Kif2a         | chr13:107750664-107812194 | 17.9785     | 25.66473333 |
| Lsm2          | chr17:35118798-35122838   | 17.97702333 | 21.43819667 |
| Napa          | chr7:16683991-16703324    | 17.97623333 | 18.73173333 |
| Gm9866        | chr12:27825660-27845381   | 17.97550667 | 0           |
| Pld3          | chr7:28317036-28338131    | 17.9626     | 45.37863333 |
| Ubxn6         | chr17:56207676-56214412   | 17.96016667 | 32.0919     |
| Galm          | chr17:80526810-80584372   | 17.95867667 | 3.066557333 |
| Tmem87b       | chr2:128644038-128679997  | 17.9579     | 18.7083     |
| Med24         | chr11:98565904-98590749   | 17.95103333 | 14.24173333 |
| Isoc1         | chr18:58819135-58839224   | 17.94983333 | 23.97896667 |
| Prom1         | chr5:44384860-44492975    | 17.9425     | 12.43333333 |
| Slc7a5        | chr8:124405045-124431586  | 17.93526667 | 19.67130667 |
| Alad          | chr4:62170203-62181097    | 17.9331     | 2.808380667 |



|               |                           |             |             |
|---------------|---------------------------|-------------|-------------|
| Snrk          | chr9:122026383-122078820  | 17.932      | 11.27245333 |
| Prkx          | chrX:75007373-75041299    | 17.93066667 | 16.85983333 |
| Zhx3          | chr2:160596182-160698726  | 17.92586667 | 8.66984     |
| Abhd4         | chr14:54873803-54888844   | 17.92203333 | 21.494      |
| Txn2          | chr15:77745480-77759424   | 17.9197     | 20.2675     |
| Parp2         | chr14:51427620-51440975   | 17.91696667 | 26.6918     |
| Rnf8          | chr17:29751775-29778604   | 17.91663333 | 17.34940667 |
| Hist1h4f      | chr13:23643200-23643512   | 17.91425667 | 10.4406     |
| Klh8          | chr5:104291068-104340248  | 17.9114     | 5.16274     |
| Myo1h         | chr5:114764949-114814585  | 17.8908     | 5.428353333 |
| Pex11b        | chr3:96439279-96449304    | 17.88834667 | 9.239036667 |
| Trcg1         | chr9:57084362-57097671    | 17.88656667 | 904.1573333 |
| Zfp329        | chr7:13389126-13404209    | 17.88496667 | 20.45186667 |
| Tmcc1         | chr6:115968635-116143392  | 17.85963333 | 12.08765667 |
| Ltf           | chr9:110921795-110945270  | 17.85474667 | 161.473955  |
| Mki67ip       | chr1:120218419-120230408  | 17.8482     | 19.67582    |
| Rab9          | chrX:162895183-162917799  | 17.84593333 | 20.75583333 |
| Eif4ebp1      | chr8:28370798-28386128    | 17.8307     | 8.867153333 |
| Mrpl39        | chr16:84717824-84735547   | 17.82455667 | 17.0581     |
| Creb3l2       | chr6:37281020-37392148    | 17.82113333 | 28.45006667 |
| Srek1ip1      | chr13:105607318-105628739 | 17.82029333 | 14.82826667 |
| 1110012L19Rik | chrX:67639087-67642591    | 17.8155     | 8.05181     |
| Cdipt         | chr7:134119862-134124015  | 17.81483333 | 16.73243333 |
| Rgs22         | chr15:35939231-36070155   | 17.8144     | 3.528936333 |
| ORF61         | chr10:79439864-79447075   | 17.81383333 | 18.04026667 |
| Med7          | chr11:46250448-46256223   | 17.81096667 | 10.79588333 |
| 2610002J02Rik | chr4:154624074-154630796  | 17.81052    | 14.87966    |
| 9130011E15Rik | chr19:45892633-46072978   | 17.80969333 | 8.79435     |
| Rasa1         | chr13:85354303-85429091   | 17.79813333 | 19.6556     |
| Aarsd1        | chr11:101268153-101278747 | 17.79173333 | 22.22828    |
| Tmem11        | chr11:60677953-60692540   | 17.78496    | 14.0382     |
| Zfp362        | chr4:128450328-128483356  | 17.78343333 | 12.40453    |
| Fam43a        | chr16:30599808-30602883   | 17.77773333 | 23.23563333 |
| Ambra1        | chr2:91570294-91759006    | 17.7706     | 15.92007333 |
| Phf21a        | chr2:92024338-92204823    | 17.769      | 23.19813333 |
| Pdzk1ip1      | chr4:114761312-114766499  | 17.76121    | 34.0055     |
| Lrrc8a        | chr2:30093288-30119310    | 17.76116667 | 16.75406667 |
| Gcc2          | chr10:57718273-57768340   | 17.75886667 | 12.71139333 |
| Camsap1       | chr2:25782357-25838802    | 17.755      | 13.15566667 |
| Cradd         | chr10:94637379-94786731   | 17.74776667 | 15.09711667 |
| 2310033E01Rik | chr7:25326676-25331024    | 17.74323333 | 24.22175    |
| Lias          | chr5:65782735-65800446    | 17.73790333 | 18.65412    |
| Ugcg          | chr4:59202421-59235705    | 17.73253333 | 17.57452    |
| Clic4         | chr4:134769884-134828675  | 17.73133333 | 11.09056667 |
| Gna13         | chr11:109224107-109262683 | 17.72738    | 22.82973333 |
| BC032203      | chr17:46935064-46968362   | 17.72013333 | 16.06907    |
| Hist1h4b      | chr13:23848889-23849201   | 17.7187     | 3.985746667 |
| Exosc10       | chr4:147932535-147956509  | 17.7176     | 15.69776    |
| Mapkapk2      | chr1:132950280-132994120  | 17.71696667 | 13.79327667 |
| Poglut1       | chr16:38525263-38550266   | 17.69973333 | 13.9033     |
| Gm10451       | chr12:77545483-77549685   | 17.69941    | 3.99375     |
| Commd7        | chr2:153442665-153458517  | 17.69916667 | 16.27055667 |

|               |                           |             |             |
|---------------|---------------------------|-------------|-------------|
| Ncoa5         | chr2:164825856-164860279  | 17.6956     | 14.94960333 |
| Lmna          | chr3:88285070-88307254    | 17.6937     | 59.3786     |
| Mvp           | chr7:134130373-134158108  | 17.6895     | 17.87643333 |
| 1810063B05Rik | chr8:128946400-128949335  | 17.68707333 | 9.03069     |
| Clpp          | chr17:57129686-57135794   | 17.6865     | 11.38501667 |
| Zzz3          | chr3:152058973-152125790  | 17.68143333 | 17.25044    |
| Maff          | chr15:79178107-79189506   | 17.6774     | 16.09833333 |
| 1700012B15Rik | chr12:3235790-3250374     | 17.67266667 | 27.53296667 |
| 1300018I17Rik | chr8:125766255-125778075  | 17.67173333 | 16.28666667 |
| Srgap1        | chr10:121218046-121484371 | 17.66796667 | 16.57576667 |
| Cdc14b        | chr13:64293852-64376296   | 17.65856667 | 12.30392667 |
| Atg5          | chr10:43988163-44084097   | 17.65133333 | 9.299023333 |
| D19Bwg1357e   | chr19:27463191-27504310   | 17.65116667 | 24.6617     |
| Tapt1         | chr5:44566400-44617845    | 17.64806667 | 21.25496667 |
| Fam149b       | chr14:21167383-21202713   | 17.6424     | 14.55019    |
| Chfr          | chr5:110564858-110600991  | 17.64236667 | 18.23356667 |
| Ddost         | chr4:137860652-137868526  | 17.6401     | 42.53776667 |
| Asprv1        | chr6:86578167-86579698    | 17.6398     | 33.5112     |
| Rgs11         | chr17:26339906-26348269   | 17.6364     | 4.243476667 |
| 1110032A04Rik | chr3:69623460-69663818    | 17.63373333 | 15.205      |
| Hcfc1r1       | chr17:23810574-23812491   | 17.62783333 | 16.3279     |
| Aagab         | chr9:63450461-63489696    | 17.62628    | 22.13056667 |
| Scg5          | chr2:113616469-113669248  | 17.62036667 | 70.82496667 |
| Trim35        | chr14:66915861-66930261   | 17.61843333 | 13.22835    |
| 2810055F11Rik | chr12:73174414-73186300   | 17.60451333 | 8.445079333 |
| Fem1a         | chr17:56396215-56403031   | 17.6038     | 10.84656    |
| Ahsa2         | chr11:23387881-23397946   | 17.60313333 | 13.9011     |
| Cpsf2         | chr12:103214183-103244203 | 17.59723333 | 16.06525667 |
| Smyd3         | chr1:180885169-181448134  | 17.5911     | 8.147823333 |
| Cdkn1b        | chr6:134870418-134875543  | 17.58726667 | 14.06673333 |
| Tomm40        | chr7:20286661-20300778    | 17.5836     | 13.26138333 |
| G3bp1         | chr11:55283253-55314389   | 17.57883333 | 19.9785     |
| Iffo2         | chr4:139086462-139176297  | 17.57753333 | 33.97533333 |
| Oma1          | chr4:102986450-103039033  | 17.57386667 | 28.76706667 |
| 2400001E08Rik | chr7:109054350-109060417  | 17.57041    | 14.93461    |
| Tnrc6a        | chr7:130267398-130338810  | 17.56563333 | 17.8337     |
| Inpp5f        | chr7:135754878-135839950  | 17.5656     | 23.5505     |
| Zfp932        | chr5:110425545-110439430  | 17.5637     | 6.97905     |
| Cpsf6         | chr10:116781723-116814029 | 17.55743333 | 13.14933333 |
| Map4k3        | chr17:80979851-81127433   | 17.5553     | 27.73396667 |
| Pcdhgb5       | chr18:37890807-38001524   | 17.5522     | 4.929025333 |
| Tmem9b        | chr7:116879349-116895777  | 17.55113333 | 37.93373333 |
| Ahctf1        | chr1:181675034-181734146  | 17.53996667 | 16.99986667 |
| Med4          | chr14:73909855-73918352   | 17.53647667 | 18.5216     |
| Numb          | chr12:85136388-85183293   | 17.53063333 | 22.7225     |
| Pnp           | chr14:51563977-51573087   | 17.52706667 | 19.28881    |
| Snx20         | chr8:91150726-91160027    | 17.51922    | 3.98994     |
| Vti1a         | chr19:55390840-55701051   | 17.51263333 | 12.86228667 |
| Nek1          | chr8:63472016-63609031    | 17.48944333 | 11.0074     |
| Taf6          | chr5:138619844-138628414  | 17.48726667 | 12.1292     |
| Ints6         | chr14:63295164-63379949   | 17.4839     | 13.68616667 |
| Dync1li1      | chr9:114597948-114632895  | 17.46573333 | 20.4563     |

|               |                           |             |             |
|---------------|---------------------------|-------------|-------------|
| Vps26b        | chr9:26812086-26837679    | 17.4643     | 24.9319     |
| Tle3          | chr9:61220172-61266304    | 17.45993333 | 13.78200333 |
| Mmaa          | chr8:81790322-81818855    | 17.44776667 | 11.08225667 |
| Decr2         | chr17:26218155-26227109   | 17.44253333 | 13.79865667 |
| Cttnbp2nl     | chr3:104804832-104856064  | 17.43743333 | 21.3378     |
| Lrrfip2       | chr9:111020614-111128172  | 17.42613333 | 15.39753333 |
| Sf3a3         | chr4:124392104-124409666  | 17.4192     | 24.82456667 |
| Adcy9         | chr16:4287544-4419587     | 17.417      | 9.2151      |
| Srsf9         | chr5:115777185-115783089  | 17.41646667 | 23.6662     |
| Mad2l2        | chr4:147514598-147519805  | 17.41226667 | 38.2766     |
| Exoc3         | chr13:74307252-74346148   | 17.4088     | 13.1905     |
| Gpa33         | chr1:168060590-168096641  | 17.40853333 | 24.1348     |
| Tspan6        | chrX:130425608-130432968  | 17.40184    | 112.4646667 |
| Dip2a         | chr10:75725793-75808036   | 17.3987     | 9.4741      |
| Irf2          | chr8:47825098-47932812    | 17.39866667 | 20.96813333 |
| Leng1         | chr7:3611708-3617442      | 17.38946667 | 13.79929    |
| Brd9          | chr13:74075285-74098343   | 17.38633333 | 9.411263333 |
| Zadh2         | chr18:84257549-84266906   | 17.3838     | 12.0932     |
| Syt5          | chr7:4491366-4498169      | 17.37936667 | 31.8521     |
| Gins4         | chr8:24337081-24348140    | 17.37620333 | 19.57848    |
| Atg13         | chr2:91514768-91550749    | 17.37546667 | 17.00081667 |
| Snora28       | chr12:112779156-112779277 | 17.37063333 | 235.6313667 |
| Ryk           | chr9:102737249-102810637  | 17.36983333 | 18.82366667 |
| Gm7334        | chr16:78360107-78377002   | 17.36148    | 15.12498667 |
| Ipo5          | chr14:121310415-121347266 | 17.36076667 | 22.7119     |
| Cyb5b         | chr8:109674560-109711370  | 17.35946667 | 27.44123333 |
| Eif1ad        | chr19:5366812-5371511     | 17.3548     | 16.26152    |
| Scfd1         | chr12:52478566-52551083   | 17.35276667 | 16.56589667 |
| Srp54c        | chr12:56331464-56364007   | 17.35053333 | 15.24836667 |
| Elp2          | chr18:24762461-24797331   | 17.34873333 | 17.20273333 |
| Rrm2b         | chr15:37853707-37890810   | 17.34806667 | 15.54766667 |
| Stag1         | chr9:100544041-100858963  | 17.34533333 | 18.8962     |
| Ripk4         | chr16:97963548-97985362   | 17.34299667 | 31.80016667 |
| Nat15         | chr16:3884618-3904781     | 17.3408     | 18.4917     |
| Entpd4        | chr14:69955207-69984799   | 17.33615    | 12.63314667 |
| Zfhx2         | chr14:55680495-55710885   | 17.33156667 | 10.09681333 |
| Cd300a        | chr11:114751354-114765965 | 17.32776667 | 15.85413333 |
| Prkab1        | chr5:116463598-116474437  | 17.31842667 | 38.64590667 |
| Trmt112       | chr19:6984187-6985516     | 17.3053     | 30.12583333 |
| 2810474O19Rik | chr6:149257935-149284185  | 17.2998     | 22.2919     |
| Zfp276        | chr8:125778094-125794451  | 17.29536667 | 10.41038    |
| Agpat4        | chr17:12312149-12412506   | 17.29206667 | 13.10636    |
| 2310061I04Rik | chr17:36029621-36034323   | 17.28183333 | 33.23836667 |
| Pno1          | chr11:17103202-17111592   | 17.2747     | 9.005526667 |
| Syp           | chrX:7215705-7230382      | 17.26958333 | 4.471433    |
| Atmin         | chr8:119467292-119484345  | 17.2537     | 24.10416667 |
| Dph3          | chr14:32893747-32898851   | 17.24433333 | 16.5117     |
| Slc25a46      | chr18:31739821-31769556   | 17.2338     | 26.3462     |
| Pkia          | chr3:7366603-7445365      | 17.2318     | 8.344536667 |
| Dnmt1         | chr9:20711649-20764332    | 17.2311     | 22.6188     |
| Pex5l         | chr3:32848552-33042004    | 17.22496667 | 26.2747     |
| Cramp1l       | chr17:25098170-25152175   | 17.21683333 | 16.44386667 |

|               |                           |             |             |
|---------------|---------------------------|-------------|-------------|
| Dhps          | chr8:87595655-87599060    | 17.20856667 | 9.607156667 |
| Kifap3        | chr1:165709809-165847231  | 17.2085     | 29.19103333 |
| Wwox          | chr8:116963551-117876612  | 17.20816667 | 3.09314     |
| Dst           | chr1:34068669-34365497    | 17.19916667 | 18.14466667 |
| Acaa1a        | chr9:119250411-119259413  | 17.19796    | 13.10683333 |
| Pcdhb16       | chr18:37637421-37642691   | 17.1956     | 18.78526667 |
| Dock9         | chr14:121941260-122196956 | 17.19039    | 9.279673333 |
| Socs4         | chr14:47896817-47911266   | 17.18723333 | 18.61726667 |
| Farp1         | chr14:121434795-121682948 | 17.18596667 | 12.87525667 |
| Pyroxd1       | chr6:142294216-142311144  | 17.1801     | 18.4479     |
| Kpna1         | chr16:35983448-36036248   | 17.1773     | 20.50293333 |
| Cryl1         | chr14:57893870-58017320   | 17.17726667 | 16.16733333 |
| Plekhg6       | chr6:125312668-125330522  | 17.1759     | 18.84684667 |
| Mafk          | chr5:140267489-140278606  | 17.17190333 | 17.62523333 |
| Wdr37         | chr13:8802213-8870976     | 17.17053333 | 14.6528     |
| Sgta          | chr10:80506817-80522899   | 17.1691     | 14.16763333 |
| Neu1          | chr17:35068197-35074242   | 17.1652     | 12.5335     |
| Rtnk          | chr6:83085801-83102573    | 17.1543     | 22.97303333 |
| Trpc1         | chr9:95607047-95650777    | 17.1489     | 13.50988333 |
| Lztf1         | chr9:123606710-123626675  | 17.14666667 | 19.88016667 |
| Creb3         | chr4:43575505-43579932    | 17.14043333 | 18.08126667 |
| Gm5111        | chr6:48539443-48540583    | 17.1285     | 0.149021667 |
| Tnpo2         | chr8:87560813-87581481    | 17.1281     | 24.76806667 |
| Mrps26        | chr2:130389492-130391130  | 17.12602    | 10.7907     |
| Kirrel3       | chr9:34296315-34843892    | 17.10976667 | 0.794793333 |
| Fbxw7         | chr3:84619498-84783120    | 17.10366667 | 16.93526667 |
| Shprh         | chr10:10869227-10935071   | 17.10263333 | 12.5076     |
| Tprn          | chr2:25118117-25125406    | 17.0992     | 7.540136667 |
| Mtmr3         | chr11:4380870-4494818     | 17.09466667 | 19.70476667 |
| Mapkap1       | chr2:34287544-34480470    | 17.09323333 | 19.51550333 |
| 2310039H08Rik | chr17:46909583-46910356   | 17.08035    | 10.87987833 |
| Dusp16        | chr6:134665490-134742646  | 17.0799     | 18.11364333 |
| Lsg1          | chr16:30561454-30587675   | 17.07886667 | 40.83196667 |
| Rnf166        | chr8:124990046-124999964  | 17.0763     | 7.915096667 |
| Kif5c         | chr2:49474833-49630298    | 17.07566667 | 13.41178333 |
| Krba1         | chr6:48345584-48369854    | 17.0679     | 6.152376667 |
| Diap1         | chr18:38004478-38095065   | 17.06703333 | 15.24387    |
| Mrpl14        | chr17:45823320-45835444   | 17.05969667 | 41.58851667 |
| 4930430F21Rik | chr15:30968880-30973086   | 17.05790667 | 2.871096667 |
| Tob2          | chr15:81678699-81688756   | 17.05326667 | 18.12736667 |
| Pbxip1        | chr3:89240625-89254874    | 17.05153333 | 21.0466     |
| 1110018G07Rik | chr12:86259098-86311836   | 17.0493     | 14.49368667 |
| Strn4         | chr7:17401237-17426280    | 17.04706667 | 13.17622    |
| Slc44a1       | chr4:53453284-53635350    | 17.04043333 | 20.99586667 |
| Myh3          | chr11:66891801-66915793   | 17.04036667 | 6.850806667 |
| Pcnx13        | chr19:5664634-5688908     | 17.03971667 | 26.2398     |
| Exosc7        | chr9:123022348-123045247  | 17.03446    | 6.404873333 |
| Tfe3          | chrX:7339786-7352328      | 17.03406667 | 33.58073333 |
| Ppard         | chr17:28369698-28438414   | 17.01775333 | 15.06776667 |
| 2700081O15Rik | chr19:7492114-7500394     | 17.01525667 | 17.1816     |
| Get4          | chr5:139728277-139746004  | 17.01279333 | 12.56677333 |
| D330045A20Rik | chrX:136014905-136089119  | 17.00978667 | 0.562660667 |

|               |                           |             |             |
|---------------|---------------------------|-------------|-------------|
| Snx27         | chr3:94301465-94386624    | 17.0002     | 20.65776667 |
| Rnaseh2b      | chr14:62950941-62991829   | 16.98410667 | 25.42624    |
| Tmem107       | chr11:68884310-68886795   | 16.977739   | 16.25326667 |
| Gramd1c       | chr16:43980462-44028058   | 16.97489333 | 5.7777      |
| Zmat5         | chr11:4604680-4637669     | 16.96905667 | 18.50755333 |
| Tmem126b      | chr7:97617338-97624505    | 16.96736333 | 18.91483333 |
| Gtf2h2        | chr13:101238531-101262564 | 16.9625     | 15.87379    |
| 1110008F13Rik | chr2:156688857-156699298  | 16.9594     | 42.816      |
| Gm11992       | chr11:8948594-8969357     | 16.95733333 | 20.9235     |
| Cep290        | chr10:99950922-100036289  | 16.95683333 | 14.05876    |
| Nol9          | chr4:151413435-151435603  | 16.9527     | 33.82676667 |
| Tead1         | chr7:119822833-120050319  | 16.93653333 | 31.01903333 |
| Asah1         | chr8:42425996-42460051    | 16.93323333 | 63.67696667 |
| Csnk1g1       | chr9:65756816-65892821    | 16.93216667 | 17.76783333 |
| Dnaja3        | chr16:4684069-4707693     | 16.9299     | 5.83647     |
| Aifm1         | chrX:45828120-45866603    | 16.9298     | 9.64524     |
| Dapp1         | chr3:137593969-137644513  | 16.92816667 | 15.14587    |
| Smc5          | chr19:23280930-23348387   | 16.92803333 | 12.02483333 |
| Mybbp1a       | chr11:72254879-72265052   | 16.9275     | 21.6622     |
| Scn3a         | chr2:65295174-65405549    | 16.91243333 | 20.10813333 |
| Fam105b       | chr15:27535675-27560448   | 16.90962    | 26.84891333 |
| Pex19         | chr1:174056885-174066628  | 16.90946667 | 12.54494    |
| Zfp260        | chr7:30880094-30892633    | 16.9094     | 18.45936667 |
| Slc37a1       | chr17:31432427-31487643   | 16.90653333 | 12.33979667 |
| Cherp         | chr8:74984381-74999132    | 16.90426667 | 17.35266667 |
| Sf3b3         | chr8:113334391-113370703  | 16.89803333 | 25.33333333 |
| Ube2s         | chr7:4759615-4763942      | 16.8817     | 22.60553333 |
| Rnf216        | chr5:143752571-143874699  | 16.87273333 | 12.19996667 |
| Maz           | chr7:134165650-134169993  | 16.86984667 | 13.95983333 |
| Ubp1          | chr4:41296028-41336799    | 16.86625667 | 21.26072    |
| Mpv17l2       | chr8:73282547-73284820    | 16.85373333 | 9.4965      |
| Filip1l       | chr16:57353389-57572917   | 16.84903333 | 51.06203333 |
| Ostm1         | chr10:42398721-42422268   | 16.84726667 | 25.04516667 |
| Nmd3          | chr3:69525976-69552968    | 16.84617667 | 38.58026667 |
| Mbnl1         | chr3:60276751-60433670    | 16.84383333 | 27.46686667 |
| Ehmt1         | chr2:24646293-24775110    | 16.84283333 | 17.38496667 |
| Pitrm1        | chr13:6547402-6579395     | 16.84243333 | 6.99232     |
| Agk           | chr6:40275476-40346761    | 16.83583333 | 3.17334     |
| Ubr1          | chr2:120686011-120796451  | 16.8323     | 12.24614333 |
| Vsnl1         | chr12:11332050-11443455   | 16.82973333 | 21.8329     |
| Tmem70        | chr1:16655271-16668356    | 16.81936667 | 7.057963333 |
| Creb1         | chr1:64579377-64651122    | 16.81663333 | 20.39873333 |
| Arl6ip4       | chr5:124566116-124568204  | 16.81044667 | 21.74666667 |
| Psmc5         | chr2:34707608-34726482    | 16.80726667 | 19.82636667 |
| Ppp6r1        | chr7:4583096-4610552      | 16.80706667 | 33.60196667 |
| Cars          | chr7:150743134-150785995  | 16.80686667 | 6.580496667 |
| Fstl3         | chr10:79240018-79245375   | 16.8056     | 12.08943    |
| Cib2          | chr9:54393158-54407886    | 16.7928     | 19.87084667 |
| Slco5a1       | chr1:12856630-12981216    | 16.78336667 | 3.168443333 |
| 2610301G19Rik | chr14:70537975-70553598   | 16.76793333 | 9.245306667 |
| 2700050L05Rik | chr7:140829357-140864700  | 16.76306667 | 13.92523333 |
| Cwf19l2       | chr9:3404084-3479236      | 16.76273333 | 14.85920667 |

|               |                           |             |             |
|---------------|---------------------------|-------------|-------------|
| Atg14         | chr14:48160567-48188109   | 16.75453333 | 6.287283333 |
| Bag2          | chr1:33802328-33814595    | 16.75008667 | 16.7365     |
| Gtpbp6        | chr5:110532995-110537216  | 16.75       | 8.397776667 |
| 2310035C23Rik | chr1:107560437-107651708  | 16.7494     | 21.29356667 |
| Rlf           | chr4:120817977-120861139  | 16.74453333 | 19.98406667 |
| Chrna10       | chr7:109259779-109265227  | 16.7417     | 0.409189667 |
| Aacs          | chr5:125956242-125997773  | 16.7323     | 11.00143667 |
| Tmem22        | chr9:100452606-100471504  | 16.73126667 | 5.406646667 |
| Tsn           | chr1:120195094-120207709  | 16.73013333 | 20.05783    |
| 0610011L14Rik | chr2:156373311-156394708  | 16.7255     | 4.350203333 |
| D17Wsu104e    | chr17:56315963-56323343   | 16.71448333 | 17.43436667 |
| Lsm14b        | chr2:179759691-179770166  | 16.71113333 | 19.7538     |
| Eif2b1        | chr5:125020222-125029066  | 16.7109     | 11.70955333 |
| 1700034H14Rik | chr18:85116685-85120916   | 16.70407    | 18.09537333 |
| Flnb          | chr14:8650470-8784101     | 16.7034     | 20.19656667 |
| Lcorl         | chr5:46088422-46248779    | 16.69353333 | 12.98323333 |
| Rnaset2b      | chr17:8321455-8340697     | 16.69138667 | 7.978373333 |
| Fam125a       | chr8:74066828-74071925    | 16.69096667 | 15.30391    |
| C430048L16Rik | chr4:12016516-12023418    | 16.68866667 | 10.65423333 |
| Klhdc3        | chr17:46811499-46817879   | 16.68527    | 15.01491333 |
| Zfp36l1       | chr12:81208746-81214000   | 16.68433333 | 34.1044     |
| Wdr60         | chr12:117445522-117501498 | 16.68426667 | 12.00586667 |
| Rbms1         | chr2:60590009-60801261    | 16.66883333 | 29.19036667 |
| 2410002O22Rik | chr13:104932232-104968546 | 16.65766667 | 17.54763333 |
| Fahd1         | chr17:24985840-24987247   | 16.65666667 | 5.43904     |
| Spef2         | chr15:9592490-9678561     | 16.65486667 | 2.322050133 |
| Fbxw5         | chr2:25356297-25360990    | 16.6511     | 28.19753333 |
| Pppde1        | chr1:180117547-180182728  | 16.64668333 | 21.94346667 |
| BC005561      | chr5:104937370-104951402  | 16.64086667 | 13.11438333 |
| Lrrc47        | chr4:153385911-153395621  | 16.63553333 | 22.3399     |
| Ptpn14        | chr1:191552146-191700572  | 16.62667333 | 18.6409     |
| Col17a1       | chr19:47720830-47766532   | 16.62613333 | 54.4288     |
| Cbfa2t2       | chr2:154262219-154365092  | 16.6223     | 29.77526667 |
| Uba3          | chr6:97133809-97155636    | 16.6115     | 36.94746667 |
| Acsl5         | chr19:55327858-55371118   | 16.6055     | 28.02373333 |
| Daxx          | chr17:34046389-34052535   | 16.60496667 | 9.829786667 |
| Ttc15         | chr12:29375492-29435318   | 16.6027     | 13.38138667 |
| Smn1          | chr13:100893159-100907653 | 16.60232667 | 7.24002     |
| Naa15         | chr3:51219937-51279907    | 16.59893333 | 25.5124     |
| 1700120K04Rik | chr7:134747416-134747959  | 16.59640333 | 0.168803667 |
| Tm2d3         | chr7:72838302-72846799    | 16.59537667 | 18.04563333 |
| Ppa1          | chr10:61111368-61136913   | 16.59395667 | 21.89076667 |
| Fbxw9         | chr8:87584017-87591019    | 16.59006333 | 7.55669     |
| Myo18a        | chr11:77590766-77679482   | 16.5818     | 14.09638    |
| Zbbx          | chr3:74841828-74947645    | 16.5807     | 12.05901667 |
| Topors        | chr4:40206638-40216874    | 16.5762     | 18.1762     |
| Traf6         | chr2:101518596-101541131  | 16.57146667 | 21.1536     |
| NfyA          | chr17:48526209-48549145   | 16.56843333 | 16.7349     |
| Ccdc123       | chr7:36182111-36223703    | 16.56673333 | 17.3059     |
| Rpe           | chr1:66747466-66766379    | 16.56246667 | 12.95974667 |
| Sc5d          | chr9:42062259-42072383    | 16.56196667 | 12.54585    |
| Bcl2          | chr1:108434755-108610867  | 16.54526667 | 15.38046667 |

|               |                           |             |             |
|---------------|---------------------------|-------------|-------------|
| Tatdn2        | chr6:113647492-113661062  | 16.54496667 | 21.34151    |
| Gon4l         | chr3:88639152-88714021    | 16.54243333 | 17.5677     |
| Gm11974       | chr11:6425593-6428763     | 16.53686    | 4.878545333 |
| 9330133O14Rik | chr8:124967555-124970376  | 16.53617667 | 13.87822667 |
| Btbd10        | chr7:120459157-120512853  | 16.53186333 | 11.82187667 |
| Stbd1         | chr5:93032076-93035605    | 16.52943333 | 4.700703333 |
| Erp44         | chr4:48206202-48292461    | 16.52876667 | 9.151423333 |
| Tmem216       | chr19:10624955-10630728   | 16.5258     | 10.08008333 |
| Nalcn         | chr14:123675862-124026366 | 16.51476667 | 34.38826667 |
| Smarca5       | chr8:83223842-83263358    | 16.50866667 | 18.03916667 |
| Atp5s         | chr12:70825948-70845645   | 16.50847333 | 15.29926    |
| Rnf115        | chr3:96531533-96595078    | 16.50793333 | 22.5638     |
| Commd2        | chr3:57448270-57455606    | 16.50764    | 13.44766    |
| Stau2         | chr1:16218890-16509383    | 16.50236667 | 31.7172     |
| Dda1          | chr8:73993092-74000334    | 16.49203333 | 19.42613333 |
| Mafb          | chr2:160189412-160192801  | 16.49112333 | 17.37641    |
| Orai2         | chr5:136623331-136646526  | 16.48306667 | 6.538706667 |
| Sephs1        | chr2:4802609-4831602      | 16.48173333 | 15.01083333 |
| Zdhhc4        | chr5:144078167-144090917  | 16.46843333 | 6.951576667 |
| Lenep         | chr3:89205817-89206572    | 16.45550667 | 4.13696     |
| Chd8          | chr14:52817825-52857247   | 16.44956667 | 27.50376667 |
| lds           | chrX:67596244-67618260    | 16.44723333 | 31.0537     |
| D10Wsu102e    | chr10:82822965-82831580   | 16.44633333 | 15.14398667 |
| Hist1h2bl     | chr13:21807631-21808012   | 16.4437     | 39.55333333 |
| Ecd           | chr14:21139080-21167343   | 16.43963333 | 7.828153333 |
| Nfe2l3        | chr6:51382668-51408767    | 16.43841    | 30.37276667 |
| Zfp1          | chr8:114167342-114194911  | 16.4236     | 5.20694     |
| Map3k11       | chr19:5689130-5702864     | 16.41576667 | 14.97023    |
| Pigu          | chr2:155103987-155183160  | 16.40773333 | 29.27183333 |
| Uros          | chr7:140878012-140900978  | 16.40643333 | 11.53920333 |
| Chmp4c        | chr3:10366972-10391005    | 16.39253333 | 13.5477     |
| Birc2         | chr9:7818225-7835255      | 16.38812333 | 26.0594     |
| AI414108      | chr9:27160269-27165128    | 16.38523333 | 15.38853667 |
| Pisd-ps2      | chr17:3064317-3084183     | 16.38436667 | 15.58773    |
| Prpf3         | chr3:95634544-95659676    | 16.38374333 | 9.64204     |
| lah1          | chr12:21322252-21329468   | 16.37976667 | 5.16814     |
| Fgd6          | chr10:93498745-93608084   | 16.37214    | 19.87196667 |
| Heatr3        | chr8:90661783-90695842    | 16.3688     | 26.41076667 |
| Eif4e         | chr3:138189154-138220563  | 16.35746667 | 26.60323333 |
| Creg1         | chr1:167693910-167705435  | 16.35116667 | 11.30794667 |
| Zmym4         | chr4:126539064-126645167  | 16.34956667 | 14.57705667 |
| Hist1h2ak     | chr13:21845303-21845696   | 16.34920333 | 5.172176333 |
| Lpcat3        | chr6:124613121-124654734  | 16.3461     | 23.12646667 |
| Poli          | chr18:70668333-70689975   | 16.34593333 | 8.35403     |
| Trrap         | chr5:145529660-145620642  | 16.3449     | 20.08893333 |
| A330050F15Rik | chr17:69788665-69838573   | 16.3448     | 5.441746667 |
| Large         | chr8:75338497-75876455    | 16.3356     | 15.36556    |
| Fam3a         | chrX:71630058-71638478    | 16.3342     | 11.88466667 |
| Herc2         | chr7:63305524-63487168    | 16.33323333 | 14.73553333 |
| Ankrd16       | chr2:11699379-11711950    | 16.33186667 | 6.18428     |
| C1galt1c1     | chrX:35983959-35988320    | 16.32787    | 33.4983     |
| Dnajb2        | chr1:75232997-75242267    | 16.32006667 | 18.65431333 |

|               |                           |             |             |
|---------------|---------------------------|-------------|-------------|
| Runx1         | chr16:92601710-92826311   | 16.31986667 | 15.55251333 |
| Hist2h3b      | chr3:96072616-96073027    | 16.31741333 | 4.352943333 |
| Znf512b       | chr2:181316807-181327166  | 16.3142     | 21.78533333 |
| 4632411B12Rik | chr1:36392574-36426026    | 16.31406667 | 16.88996667 |
| Chchd5        | chr2:128955435-128959847  | 16.3079     | 12.47696667 |
| Rnf150        | chr8:85387254-85615170    | 16.30589333 | 14.47833333 |
| Pnpla7        | chr2:24831552-24909592    | 16.30383    | 7.69984     |
| Crkl          | chr16:17452079-17486348   | 16.3006     | 19.1945     |
| Tmc6          | chr11:117627298-117641997 | 16.29866667 | 20.37476667 |
| Brf1          | chr12:114198072-114238832 | 16.2901     | 15.16717667 |
| Phf17         | chr3:41359655-41420786    | 16.287      | 22.20106667 |
| Pam16         | chr16:4616465-4624946     | 16.28166667 | 10.88564333 |
| Tshz1         | chr18:84181018-84255954   | 16.27623333 | 12.20748    |
| 1110020A21Rik | chr17:85316521-85357050   | 16.27387333 | 11.17910333 |
| Whamm         | chr7:88716177-88741722    | 16.27292667 | 6.881593333 |
| Rsph9         | chr17:46266225-46281147   | 16.2725     | 30.50166667 |
| Zfp84         | chr7:30553570-30566438    | 16.27043333 | 16.08286667 |
| Atad2b        | chr12:4924158-5054216     | 16.26586667 | 18.5104     |
| lft172        | chr5:31555651-31593487    | 16.25673333 | 9.075573333 |
| Bcl9          | chr3:97008550-97020430    | 16.25663333 | 20.1066     |
| Mrpl51        | chr6:125142217-125144410  | 16.2556     | 15.28491667 |
| Tmem164       | chrX:139115942-139278037  | 16.2554     | 10.70767667 |
| Ap2a2         | chr7:148748078-148818910  | 16.24803333 | 20.80523333 |
| Cd68          | chr11:69477872-69479564   | 16.24173667 | 19.58018667 |
| Zfp532        | chr18:65739883-65849090   | 16.23793333 | 18.78476667 |
| Surf1         | chr2:26768897-26772050    | 16.23206667 | 23.11604667 |
| Slc44a3       | chr3:121162445-121235262  | 16.2296     | 34.0283     |
| lws1          | chr18:32227387-32263985   | 16.22883333 | 15.0455     |
| Erich1        | chr8:14027564-14090327    | 16.22826667 | 10.80786667 |
| Lmbrd1        | chr1:24685382-24823146    | 16.21976667 | 14.0411     |
| Tctn3         | chr19:40670935-40686705   | 16.21811    | 6.52796     |
| Rnd3          | chr2:50985958-51004631    | 16.20671667 | 35.2147     |
| Rictor        | chr15:6658380-6750400     | 16.2043     | 16.01396667 |
| Mtif2         | chr11:29426456-29445255   | 16.20396333 | 21.3286     |
| Usp46         | chr5:74396061-74464436    | 16.20216667 | 27.55566667 |
| Slc20a2       | chr8:23587171-23680088    | 16.20026667 | 14.45774333 |
| Smad2         | chr18:76401354-76471401   | 16.19476667 | 12.03324    |
| Brpf1         | chr6:113257190-113274698  | 16.1927     | 7.256836667 |
| Mtmr4         | chr11:87405718-87429798   | 16.18856667 | 21.95253333 |
| Ddi2          | chr4:141239477-141279334  | 16.18576667 | 11.93321333 |
| Nfkbiz        | chr16:55811489-55838754   | 16.1783     | 26.4988     |
| Apex1         | chr14:51544623-51546863   | 16.17306667 | 33.1211     |
| Hgs           | chr11:120328948-120345298 | 16.16372    | 6.689433333 |
| Rep15         | chr6:146981058-146982040  | 16.15572667 | 1.17758     |
| 1110028C15Rik | chr1:66765816-66864169    | 16.15266667 | 10.78050667 |
| Tulp3         | chr6:128271178-128305869  | 16.15143333 | 16.0527     |
| lfih1         | chr2:62433849-62484312    | 16.14760667 | 15.73105333 |
| Batf          | chr12:87027669-87050037   | 16.1426     | 4.37349     |
| Nhlrc2        | chr19:56622750-56673336   | 16.13776667 | 9.11821     |
| Enoph1        | chr5:100469012-100497784  | 16.13099333 | 10.00202333 |
| Rdm1          | chr11:101489262-101497395 | 16.12821667 | 4.320716667 |
| Fam135a       | chr1:24017596-24107180    | 16.12773333 | 15.41236667 |



|               |                           |             |             |
|---------------|---------------------------|-------------|-------------|
| Al463170      | chr12:77647958-77648912   | 16.1252     | 14.87212333 |
| Mllt1         | chr17:57032033-57074811   | 16.11323333 | 14.46746667 |
| Rnf214        | chr9:45671773-45714960    | 16.10908    | 23.668      |
| Prkd2         | chr7:17428250-17455810    | 16.1063     | 12.26755    |
| Ece1          | chr4:137418151-137521144  | 16.10406    | 52.3072     |
| Eed           | chr7:97103163-97129486    | 16.10346    | 14.56463667 |
| Qser1         | chr2:104594953-104656853  | 16.0853     | 26.3596     |
| Zfp398        | chr6:47785659-47818256    | 16.0832     | 22.35685667 |
| Dhx36         | chr3:62272563-62310910    | 16.0816     | 11.55727    |
| Fmr1          | chrX:65931729-65971136    | 16.07493333 | 14.8841     |
| Med12l        | chr3:58810899-59122334    | 16.07426667 | 11.659      |
| 4930452B06Rik | chr14:9263685-9498804     | 16.07256667 | 12.2264     |
| Cdc27         | chr11:104363842-104411934 | 16.06775667 | 26.6772     |
| Mtch2         | chr2:90687311-90706791    | 16.06626667 | 17.4859     |
| B3gat3        | chr19:8994882-9001726     | 16.06213333 | 11.43264    |
| Camsap2       | chr1:138164699-138242681  | 16.06036667 | 17.73823333 |
| Rnpep         | chr1:137159275-137180661  | 16.059      | 12.58894333 |
| Zfp62         | chr11:49017001-49032318   | 16.05331333 | 12.92118    |
| Xrn1          | chr9:95855178-95953448    | 16.05173333 | 17.19317    |
| Zc3h18        | chr8:124900515-124941260  | 16.05083333 | 8.805236667 |
| Ankrd13c      | chr3:157610429-157669801  | 16.0399     | 16.3933     |
| Gm10549       | chr18:33623816-33634364   | 16.03430333 | 0.047116067 |
| Camk1d        | chr2:5214502-5635710      | 16.02576667 | 19.63503333 |
| Sirt4         | chr5:115928018-115934493  | 16.02546667 | 4.324653333 |
| Cirh1a        | chr8:109417539-109446994  | 16.02366333 | 12.7337     |
| Mapk9         | chr11:49660252-49699923   | 16.0236     | 17.60187333 |
| Nploc4        | chr11:120241111-120299014 | 16.02123333 | 16.86736667 |
| Smc6          | chr12:11272691-11326591   | 16.021      | 15.17298333 |
| Pkn1          | chr8:86193660-86223078    | 16.01026667 | 10.20676333 |
| Rbbp4         | chr4:128984343-129012614  | 16.00786667 | 23.35773333 |
| Tufm          | chr7:133630868-133634245  | 16.00282333 | 6.25635     |
| Zfand2b       | chr1:75165219-75168200    | 15.99006667 | 13.22115667 |
| Dnttip1       | chr2:164571514-164593719  | 15.97828333 | 5.742483333 |
| Gm7367        | chr11:116295526-116300345 | 15.97747667 | 9.943733333 |
| Dcp1b         | chr6:119125270-119171632  | 15.97003    | 9.63052     |
| 4932438A13Rik | chr3:36762027-36951955    | 15.96446667 | 16.8577     |
| Bex2          | chrX:132601103-132602775  | 15.96429    | 12.977888   |
| Myg1          | chr15:102162139-102168569 | 15.96256667 | 13.77666    |
| Brms1l        | chr12:56937352-56970722   | 15.9617     | 14.98086333 |
| Mapk8ip3      | chr17:25034450-25073922   | 15.95963333 | 15.4797     |
| Flywch2       | chr17:23913884-23923044   | 15.95534667 | 7.735223333 |
| Ap3s2         | chr7:87020210-87065526    | 15.95093333 | 15.70856667 |
| Slc22a18      | chr7:150659659-150685237  | 15.95043    | 6.257666667 |
| Tnfrsf25      | chr4:151490451-151494220  | 15.94823667 | 15.29386    |
| 2310001A20Rik | chr2:150408816-150434259  | 15.948      | 19.44944667 |
| Nacc2         | chr2:25911055-25978331    | 15.9383     | 5.348991    |
| Ivd           | chr2:118687735-118707093  | 15.9347     | 9.107893333 |
| Acbd6         | chr1:157405249-157534363  | 15.93063    | 16.96746667 |
| Kcnh3         | chr15:99055406-99073248   | 15.93023333 | 23.5038     |
| Erc5          | chr1:44204588-44238105    | 15.925      | 15.48616667 |
| Kif21b        | chr1:138027977-138074591  | 15.92256667 | 2.101646667 |
| Pskh1         | chr8:108424373-108455702  | 15.89859333 | 9.17753     |

|               |                           |             |             |
|---------------|---------------------------|-------------|-------------|
| Tom34         | chr2:163879276-163896838  | 15.89523333 | 15.2832     |
| Top2          | chr1:43990851-44059816    | 15.88830667 | 25.93623333 |
| 6430548M08Rik | chr8:122638051-122689207  | 15.88786667 | 28.32466667 |
| Arhgap21      | chr2:20769545-20889348    | 15.8875     | 22.79143333 |
| Dmx1          | chr18:49992650-50125127   | 15.8854     | 18.31633333 |
| Rbm45         | chr2:76208040-76221824    | 15.88453333 | 13.30872967 |
| Kctd20        | chr17:29090160-29104882   | 15.88143333 | 9.358336667 |
| Krt80         | chr15:101180001-101200556 | 15.88090667 | 39.61293333 |
| Nek9          | chr12:86640463-86680312   | 15.88023333 | 15.17839333 |
| Impa1         | chr3:10313539-10331439    | 15.87876667 | 14.496      |
| Ppid          | chr3:79395310-79407572    | 15.8773     | 18.29380333 |
| Mett14        | chr3:123071212-123088908  | 15.87238667 | 12.24421667 |
| Rhog          | chr7:109387636-109398632  | 15.87220333 | 20.8249     |
| Ppwd1         | chr13:104995201-105018924 | 15.86143667 | 5.49081     |
| Ddx10         | chr9:52906558-53056217    | 15.84846667 | 13.1005     |
| Rmi1          | chr13:58503608-58512510   | 15.84771667 | 17.79861    |
| AI846148      | chr19:7430953-7457516     | 15.8463     | 16.33786    |
| Wsb1          | chr11:79052883-79068197   | 15.84524333 | 20.39496667 |
| Snx13         | chr12:35731860-35832149   | 15.84452667 | 19.51806667 |
| Trim12c       | chr7:111487267-111501872  | 15.83996667 | 7.606713333 |
| Mrpl16        | chr19:11844904-11849436   | 15.83966667 | 32.70966667 |
| AI428936      | chr7:31099834-31104064    | 15.83596667 | 21.45046667 |
| Mrps7         | chr11:115465464-115468938 | 15.83304667 | 29.72116667 |
| 1700019E19Rik | chr12:87423510-87503409   | 15.83188333 | 19.30645333 |
| Lsm4          | chr8:73197129-73202651    | 15.82596667 | 35.29636667 |
| Tmem189       | chr2:167468724-167487044  | 15.81846667 | 6.022566667 |
| Rasa2         | chr9:96439718-96531922    | 15.81832333 | 12.33623333 |
| Zfp523        | chr17:28314362-28342831   | 15.81730667 | 6.76478     |
| Camta1        | chr4:150433631-151235877  | 15.81656667 | 21.87223333 |
| Pkp2          | chr16:16213437-16272805   | 15.8146     | 15.32014667 |
| Col4a3bp      | chr13:97312689-97410122   | 15.8134     | 17.3778     |
| Rpp38         | chr2:3246220-3249900      | 15.80887333 | 9.699996667 |
| Il18          | chr9:50373472-50389942    | 15.80032    | 22.50775667 |
| Wdr19         | chr5:65590934-65651654    | 15.792      | 11.42081    |
| Hmga1-rs1     | chr17:27693597-27700616   | 15.77626667 | 43.96683333 |
| Actl6a        | chr3:32607467-32625893    | 15.7723     | 16.88936333 |
| Polg2         | chr11:106629517-106640851 | 15.77060667 | 13.12296667 |
| Rn4.5s        | chr6:47622224-47622398    | 15.76922    | 35.08816667 |
| Mtmr10        | chr7:71432555-71485692    | 15.76803333 | 23.137      |
| Nsmce4a       | chr7:137676039-137690895  | 15.76597333 | 11.67565333 |
| Rabgef1       | chr5:130647688-130690207  | 15.7551     | 11.17923667 |
| Exd2          | chr12:81564081-81599122   | 15.7412     | 23.73326667 |
| Golga2        | chr2:32143772-32163441    | 15.73893333 | 12.05531333 |
| Gm12942       | chr4:126803289-126806888  | 15.73322333 | 16.2797     |
| Slc33a1       | chr3:63746257-63768655    | 15.7321     | 8.069706667 |
| Fam179b       | chr12:66066728-66123560   | 15.72753333 | 14.27603667 |
| BC024479      | chr9:37296905-37331735    | 15.72633333 | 15.35981333 |
| Rab40c        | chr17:26019058-26056659   | 15.71372    | 5.171786667 |
| Pcdhgb4       | chr18:37880207-38001524   | 15.70856667 | 3.58112     |
| Wdr7          | chr18:63868348-64149413   | 15.7053     | 18.23026667 |
| Bola1         | chr3:96000510-96001509    | 15.70381667 | 14.53190667 |
| Ndufa4l2      | chr10:126951994-126954210 | 15.70288667 | 27.14088    |

|               |                           |             |             |
|---------------|---------------------------|-------------|-------------|
| Trove2        | chr1:145597920-145624181  | 15.69433333 | 16.69676667 |
| Prkrip1       | chr5:136656226-136674824  | 15.688      | 18.9839466  |
| 2010016I18Rik | chr3:106284903-106288831  | 15.67876667 | 0.878966667 |
| BC016423      | chr13:3565280-3610354     | 15.6721     | 18.30013333 |
| Ash2l         | chr8:26927341-26958142    | 15.66623333 | 32.5694     |
| 4732416N19Rik | chr6:148160809-148184185  | 15.65845333 | 9.826536667 |
| Spr           | chr6:85083673-85087758    | 15.65474    | 6.352503333 |
| Azin1         | chr15:38417184-38449021   | 15.6542     | 29.99243333 |
| Zfp322a       | chr13:23444972-23461071   | 15.64943333 | 14.86913333 |
| Gpn3          | chr5:122822516-122832778  | 15.64893333 | 17.50737    |
| Coro7         | chr16:4626883-4679720     | 15.63173333 | 9.409883333 |
| Cmpk2         | chr12:27154079-27164702   | 15.62716667 | 10.12842667 |
| Mapre3        | chr5:31117128-31168479    | 15.62543333 | 24.93883333 |
| 3830406C13Rik | chr14:13116722-13135745   | 15.6199     | 11.46125    |
| Mklin1        | chr6:31348827-31459477    | 15.61953333 | 27.0115     |
| Rrp7a         | chr15:82946276-82953231   | 15.61931    | 16.05343    |
| Ddhd1         | chr14:46212848-46277818   | 15.6148     | 19.54943333 |
| Gm16517       | chr10:79132154-79138871   | 15.61247667 | 4.45212     |
| Cpox          | chr16:58670320-58680502   | 15.60383333 | 8.080703333 |
| Sdccag3       | chr2:26238319-26244836    | 15.6035     | 19.81503333 |
| Fdps          | chr3:88897509-88905889    | 15.59736667 | 16.9419     |
| Airn          | chr17:12934176-13052750   | 15.59592    | 22.35875    |
| Pigz          | chr16:31933936-31946132   | 15.59557333 | 5.981950667 |
| Ppp1r11       | chr17:37085299-37088737   | 15.58034667 | 13.15229    |
| Ddx39         | chr8:86239075-86247250    | 15.57367    | 17.19826667 |
| Rn4.5s        | chr6:47702750-47702924    | 15.57284333 | 35.90323333 |
| Dera          | chr6:137703097-137786393  | 15.57093333 | 13.69929333 |
| Taf11         | chr17:28038072-28044669   | 15.57017333 | 37.28143333 |
| Ddx21         | chr10:62042994-62065046   | 15.56546667 | 21.33946667 |
| Ccdc90b       | chr7:99709658-99730804    | 15.55173333 | 7.258713333 |
| Zfp719        | chr7:50834955-50849080    | 15.54833333 | 8.927383333 |
| Trpm7         | chr2:126617293-126701997  | 15.5382     | 17.95373333 |
| Pank3         | chr11:35582996-35604787   | 15.53283333 | 25.16556667 |
| Eci1          | chr17:24563627-24576261   | 15.53013    | 17.78328333 |
| Ptpn23        | chr9:110287592-110310714  | 15.5289     | 20.71857333 |
| Arl13b        | chr16:62793514-62846866   | 15.5284     | 13.36668667 |
| Wdr48         | chr9:119804012-119835697  | 15.52409333 | 18.80333333 |
| Msl2          | chr9:100978450-101007129  | 15.51366667 | 16.06866667 |
| Gm9855        | chr10:82092586-82113022   | 15.51136667 | 11.48043333 |
| Alox8         | chr11:68997386-69011341   | 15.50878667 | 2.600867667 |
| Cmtm7         | chr9:114665953-114691111  | 15.50303667 | 10.19324667 |
| Ftsj3         | chr11:106110457-106117116 | 15.4988     | 10.43164333 |
| 2310015A10Rik | chr12:81221532-81233831   | 15.48843333 | 4.05484     |
| A130010J15Rik | chr1:194999662-195004026  | 15.48632    | 14.28088    |
| Aqr           | chr2:113926908-114001075  | 15.48064333 | 20.75733333 |
| Smndc1        | chr19:53453703-53465063   | 15.48008667 | 22.832      |
| Ube2n         | chr10:94977795-95008292   | 15.47807667 | 17.34216667 |
| Cep120        | chr18:53841376-53904201   | 15.47086667 | 8.092196667 |
| Zfp516        | chr18:83080270-83174706   | 15.46786667 | 7.707016667 |
| Unc45a        | chr7:87470178-87485105    | 15.46473333 | 12.56693333 |
| Ascc2         | chr11:4537795-4583388     | 15.45676667 | 27.0728     |
| Mrps15        | chr4:125724171-125732780  | 15.4553     | 20.8929     |

|               |                           |             |             |
|---------------|---------------------------|-------------|-------------|
| Exoc6         | chr19:37624907-37757739   | 15.45493333 | 21.864      |
| Mrps24        | chr11:5603985-5607702     | 15.45459667 | 30.4978     |
| Slc22a17      | chr14:55525563-55531969   | 15.45416667 | 12.88600667 |
| Timp3         | chr10:85763156-85812250   | 15.45333333 | 23.8388     |
| AA388235      | chr17:34118436-34122303   | 15.44908333 | 9.512082    |
| Tom1l1        | chr11:90507004-90548915   | 15.43331    | 9.987706667 |
| Gtf2ird1      | chr5:134833530-134932586  | 15.42293333 | 19.97773333 |
| Sh3d19        | chr3:85888355-85934443    | 15.42253333 | 20.75706667 |
| Grk6          | chr13:55546694-55562288   | 15.42210667 | 14.18279333 |
| Prickle3      | chrX:7235658-7245312      | 15.41821333 | 13.74677    |
| Vps4a         | chr8:109555225-109569656  | 15.4174     | 7.883036667 |
| Rundc3a       | chr11:102254716-102264253 | 15.41166667 | 27.22393333 |
| Asap2         | chr12:21117616-21276032   | 15.40866667 | 21.90236667 |
| 2310003C23Rik | chr2:180447250-180453222  | 15.40596667 | 13.11975667 |
| Parm1         | chr5:91946725-92053022    | 15.4057     | 16.99333333 |
| Xiap          | chrX:39421012-39462841    | 15.40313333 | 14.03996667 |
| Mbip          | chr12:57429293-57446881   | 15.39882667 | 10.41299333 |
| Traf3ip2      | chr10:39332739-39375113   | 15.39096667 | 16.0272     |
| Zmpste24      | chr4:120731842-120770848  | 15.39073333 | 28.76026667 |
| Ube2f         | chr1:93146895-93182602    | 15.3874     | 14.18933333 |
| Atic          | chr1:71603729-71625977    | 15.3873     | 13.55875    |
| Wdr41         | chr13:95746302-95793269   | 15.37973    | 10.84562667 |
| Tnfaip3       | chr10:18720716-18735216   | 15.37963333 | 11.04877667 |
| Trabd         | chr15:88906493-88917505   | 15.37776667 | 14.91200667 |
| Ube2g2        | chr10:77085065-77108735   | 15.37543333 | 14.049      |
| Ezh2          | chr6:47480272-47545029    | 15.37253333 | 11.35119    |
| Tnrc18        | chr5:143200557-143579066  | 15.36733333 | 13.5557     |
| Hibch         | chr1:52901889-52977704    | 15.36669333 | 31.94256667 |
| Insr          | chr8:3150921-3279617      | 15.36593333 | 22.1013     |
| Zbtb11        | chr16:55973916-56009025   | 15.36493333 | 17.70953333 |
| Cep57         | chr9:13612231-13631551    | 15.36491    | 13.14515667 |
| Gstp2         | chr19:4040287-4042221     | 15.3638     | 12.08226667 |
| Fam108b       | chr19:21727798-21760127   | 15.3637     | 14.38613667 |
| Rmnd5b        | chr11:51437174-51449398   | 15.36203333 | 13.50940333 |
| Gm5105        | chr3:137711724-137730352  | 15.35713333 | 0.117028    |
| Ppme1         | chr7:107475246-107520406  | 15.35396667 | 16.84144333 |
| Erc3          | chr18:32399984-32429801   | 15.35054333 | 11.94866    |
| Ptpn11        | chr5:121580541-121641406  | 15.34983333 | 15.92057667 |
| Cast          | chr13:74831733-74945369   | 15.3492     | 18.63066667 |
| Grb2          | chr11:115505457-115569911 | 15.34293333 | 10.84949667 |
| Cisd1         | chr10:70793241-70807597   | 15.33886667 | 30.10416667 |
| Zbtb8os       | chr4:129013269-129024273  | 15.33743333 | 12.14292    |
| E2f6          | chr12:16817770-16833558   | 15.32815667 | 5.551316667 |
| Mast2         | chr4:115979366-116136788  | 15.32463333 | 10.65137667 |
| Alg5          | chr3:54539460-54553717    | 15.32060667 | 51.45196667 |
| Cobra1        | chr2:25055231-25067009    | 15.30983333 | 16.15046667 |
| 4933411K20Rik | chr8:47254909-47280944    | 15.30817    | 18.12313333 |
| Inpp5k        | chr11:75444521-75462367   | 15.30286667 | 16.42183333 |
| Gopc          | chr10:52056829-52101930   | 15.2998     | 16.17186667 |
| Gm13498       | chr2:50765203-50767366    | 15.29654    | 21.54496667 |
| Plekha5       | chr6:140372619-140543427  | 15.29643333 | 10.00202    |
| Srprb         | chr9:103090362-103104395  | 15.29466667 | 9.390503333 |

|               |                                 |             |             |
|---------------|---------------------------------|-------------|-------------|
| Samd1         | chr8:86521570-86524285          | 15.29266667 | 14.23833333 |
| Bcl7b         | chr5:135644241-135657722        | 15.28713333 | 22.014      |
| Dhx33         | chr11:70797592-70817934         | 15.28213    | 8.308356667 |
| Mxi1          | chr19:53384995-53450300         | 15.27846667 | 18.52233333 |
| Atp6v1g2      | chr17:35373540-35375712         | 15.27313333 | 12.22436333 |
| Serp2         | chr14:76932618-76956696         | 15.26396667 | 0.37223     |
| AI429214      | chr8:38056628-38058587          | 15.26306667 | 5.702143333 |
| Ltn1          | chr16:87376895-87432851         | 15.26013333 | 16.41423333 |
| 2810046L04Rik | chr3:53267738-53285677          | 15.25969333 | 20.8987     |
| Pcgf1         | chr6:83028383-83030849          | 15.25886333 | 11.28093333 |
| Itm2c         | chr1:87791084-87805273          | 15.25813333 | 24.00693333 |
| Marcks        | chr10:36853048-36858732         | 15.25793333 | 21.21483333 |
| Mpv17l        | chr16:13940787-13949450         | 15.25716667 | 14.80247667 |
| Amotl1        | chr9:14346410-14419444          | 15.25203333 | 19.3203     |
| Acap2         | chr16:31092498-31201324         | 15.24536667 | 26.88546667 |
| Sbno2         | chr10:79519758-79565447         | 15.22332667 | 8.545593333 |
| Lgals3        | chr14:47993534-48005842         | 15.22184    | 33.72206667 |
| Itgb1bp1      | chr12:21275666-21292098         | 15.21821333 | 11.13417667 |
| AW549877      | chr15:3932034-3945752           | 15.21352667 | 17.31793333 |
| Psmb10        | chr8:108459627-108462292        | 15.20659667 | 2.341383333 |
| Med28         | chr5:45911467-45920523          | 15.20496667 | 11.78493333 |
|               | 8-Sep chr11:117060974-117223639 | 15.20274333 | 29.02       |
| Ppp4r1        | chr17:66132694-66191266         | 15.19626667 | 13.77712333 |
| Ppapdc1b      | chr8:26830519-26835359          | 15.19253333 | 14.77018667 |
| Lrch3         | chr16:32914185-33016115         | 15.19246667 | 11.9148     |
| Ikkip         | chr10:90545783-90565358         | 15.19243333 | 8.002386667 |
| Isg15         | chr4:155573532-155574927        | 15.19074333 | 6.544181667 |
| Fam96b        | chr8:107163738-107165628        | 15.18881333 | 19.13888333 |
| Rbm42         | chr7:31426013-31435247          | 15.18846667 | 16.70299667 |
| Pcdhga9       | chr18:37896589-38001517         | 15.1844     | 4.256363333 |
| Ptpmt1        | chr2:90750869-90758207          | 15.17422667 | 13.48752667 |
| Eid2b         | chr7:29062724-29065148          | 15.17243333 | 3.58265     |
| Tmem42        | chr9:122930443-122932609        | 15.16456667 | 8.058896667 |
| Zfp658        | chr7:50817739-50830831          | 15.15615    | 2.970823333 |
| Wdr35         | chr12:8980806-9035653           | 15.15376667 | 10.66524333 |
| Hmbox1        | chr14:65441054-65568684         | 15.15163667 | 17.78733333 |
| Nvl           | chr1:183023553-183074288        | 15.14926    | 15.00062    |
| Psmc3ip       | chr11:100953454-100956749       | 15.14813333 | 12.87824333 |
| Epha5         | chr5:84483787-84846407          | 15.14776667 | 0.472569667 |
| Cc2d1a        | chr8:86656726-86671652          | 15.1461     | 23.8196     |
| Sdhaf2        | chr19:10575001-10599699         | 15.13497    | 4.28961     |
| Brwd3         | chrX:105937546-106029694        | 15.13083333 | 20.216      |
| Eif2d         | chr1:133049783-133070048        | 15.12794    | 10.46298    |
| Gripap1       | chrX:7367120-7397689            | 15.12043333 | 13.10983667 |
| Ralb          | chr1:121366881-121401359        | 15.1108     | 7.838809    |
| Dnpep         | chr1:75305139-75314212          | 15.10458667 | 8.693413333 |
| Lipo1         | chr19:33629770-33664801         | 15.10133333 | 6.047126667 |
| Trim41        | chr11:48619905-48630893         | 15.09953333 | 15.40253333 |
| Zscan29       | chr2:120983162-120996885        | 15.09853333 | 12.00322    |
| Rps6ka2       | chr17:7374463-7507664           | 15.0933     | 5.546576667 |
| Cdv3          | chr9:103255431-103268110        | 15.08968    | 26.2042     |
| Tmed5         | chr5:108550665-108561610        | 15.08811333 | 11.0331     |

|               |                           |             |             |
|---------------|---------------------------|-------------|-------------|
| Dsg3          | chr18:20668804-20699811   | 15.0838     | 39.97323333 |
| Atxn3         | chr12:103157110-103196453 | 15.07926667 | 11.62531    |
| Taf3          | chr2:9836178-9970236      | 15.0758     | 6.300873333 |
| Cdk10         | chr8:125748740-125756156  | 15.0744     | 5.663853333 |
| Mrps6         | chr16:92058580-92112472   | 15.07333333 | 11.19494667 |
| Zfp784        | chr7:4986047-4990048      | 15.06960667 | 8.994063333 |
| Glrx          | chr13:75977333-75987599   | 15.06469333 | 23.51855    |
| Ncbp1         | chr4:46151382-46185274    | 15.06353333 | 19.08838    |
| Imp4          | chr1:34496673-34502592    | 15.06216667 | 31.8011     |
| Plaa          | chr4:94231829-94269938    | 15.0568     | 19.5167     |
| Spcs2         | chr7:106986078-107007393  | 15.05646667 | 22.58446667 |
| Srgn          | chr10:61957175-61970503   | 15.0454     | 1.920820333 |
| Ogfod2        | chr5:124562346-124565485  | 15.02938333 | 15.76531667 |
| Eaf1          | chr14:32308264-32323044   | 15.0286     | 13.68169333 |
| Rn4.5s        | chr6:47604919-47605093    | 15.00093    | 32.71253333 |
| Zbtb7c        | chr18:75979831-76308218   | 15.0007     | 19.0881     |
| Prpf18        | chr2:4543212-4573132      | 15.00033333 | 15.72580333 |
| Spof1         | chr2:130995996-131000546  | 14.9953     | 9.249766667 |
| Sirt3         | chr7:148049561-148068208  | 14.99170667 | 8.880829333 |
| Arhgap32      | chr9:31923720-32073096    | 14.98346667 | 34.99933333 |
| Gyg           | chr3:20021969-20054995    | 14.97276667 | 10.28984767 |
| Qk            | chr17:10399335-10512226   | 14.96763333 | 22.42683333 |
| Taok2         | chr7:134009190-134028481  | 14.96223333 | 22.97156667 |
| Lrig2         | chr3:104257905-104315779  | 14.96198333 | 10.73248    |
| Thtpa         | chr14:55713620-55717832   | 14.9596     | 11.86503333 |
| Ocri          | chrX:45265632-45319043    | 14.95726667 | 20.6449     |
| Slc25a33      | chr4:149118144-149148376  | 14.95660667 | 7.696347667 |
| Dnajc24       | chr2:105806864-105843706  | 14.95558    | 8.963853333 |
| Cideb         | chr14:56372891-56377261   | 14.95360667 | 0.82092967  |
| Tomm20        | chr8:129454563-129469821  | 14.9514     | 18.92176667 |
| Acadsb        | chr7:138554114-138589725  | 14.9464     | 17.11256667 |
| Ckb           | chr12:112907565-112910549 | 14.94480333 | 70.0461     |
| LOC545261     | chr18:61799306-61807157   | 14.93832667 | 41.98693333 |
| Htr1b         | chr9:81524998-81526159    | 14.93236    | 1.273423333 |
| Golga1        | chr2:38872022-38920926    | 14.92725333 | 10.56881    |
| Armcx1        | chrX:131252476-131256451  | 14.92662667 | 7.698556667 |
| Magt1         | chrX:103163423-103207238  | 14.91276    | 15.99039667 |
| Mfap3l        | chr8:63111656-63155528    | 14.91113333 | 15.05659333 |
| Sppl3         | chr5:115461532-115548799  | 14.90653333 | 23.8967     |
| Mettl9        | chr7:128177958-128220349  | 14.90606667 | 63.766      |
| Gm15545       | chr7:52242269-52249971    | 14.9013     | 20.25311333 |
| ltsn1         | chr16:91729615-91920824   | 14.90046667 | 12.72843333 |
| Zfand2a       | chr5:139947169-139960445  | 14.89147333 | 20.5584     |
| Upf1          | chr8:72855420-72877172    | 14.885      | 14.209      |
| Snora43       | chr2:26493366-26493505    | 14.88126667 | 14.69233333 |
| Bphl          | chr13:34129509-34165943   | 14.87746667 | 19.15493333 |
| 2810405K02Rik | chr4:154270538-154273152  | 14.86998    | 33.07033333 |
| BC060267      | chr6:115760746-115788430  | 14.86958333 | 7.12057     |
| Atp6v1c2      | chr12:17291526-17331536   | 14.86870667 | 17.93388    |
| Ticam1        | chr17:56408884-56416190   | 14.86390333 | 9.410276667 |
| 2610015P09Rik | chr16:43890014-43964427   | 14.86324    | 9.083596667 |
| Ermp1         | chr19:29684372-29722910   | 14.86256333 | 22.5319     |

|               |                          |             |             |
|---------------|--------------------------|-------------|-------------|
| Kpna3         | chr14:61984022-62058784  | 14.8595     | 19.16056667 |
| Alox5ap       | chr5:150076633-150099623 | 14.85923333 | 0.522523333 |
| N4bp2l2       | chr5:151438547-151468187 | 14.85836667 | 10.41533667 |
| Serinc2       | chr4:129930740-129952830 | 14.85816    | 44.76363333 |
| Ccdc23        | chr4:118867914-118873903 | 14.85159    | 43.2553     |
| Pacrgl        | chr5:48763630-48779995   | 14.84310667 | 14.47971333 |
| 2410002F23Rik | chr7:51502091-51507689   | 14.8422     | 19.07056667 |
| Stk35         | chr2:129626252-129658021 | 14.83946667 | 12.68699333 |
| Gas8          | chr8:126042734-126060550 | 14.82655333 | 13.54547333 |
| Rexo1         | chr10:80003670-80024305  | 14.81714    | 8.580343333 |
| Arnt2         | chr7:91394788-91558469   | 14.81156667 | 2.258564    |
| Zfp622        | chr15:25914120-25928237  | 14.80967333 | 12.14496667 |
| 5830417I10Rik | chr3:88580978-88633293   | 14.8095     | 17.62146667 |
| Pom121        | chr5:135852009-135870416 | 14.80746667 | 24.3946     |
| Chchd6        | chr6:89333139-89545646   | 14.80707667 | 13.56783333 |
| Tmem80        | chr7:148514028-148523054 | 14.80001667 | 18.58931667 |
| Ccdc90a       | chr13:43633774-43655560  | 14.79956667 | 14.72715667 |
| Txndc9        | chr1:38040711-38054053   | 14.79486667 | 14.02516667 |
| Thoc2         | chrX:39148170-39265078   | 14.79121333 | 16.00353333 |
| 1600021P15Rik | chr16:28826261-28929784  | 14.78667    | 13.40646333 |
| D630037F22Rik | chr10:55734099-55948495  | 14.7857     | 7.2417      |
| Agfg1         | chr1:82836057-82892850   | 14.77722333 | 9.003606667 |
| Pbx2          | chr17:34729415-34734286  | 14.77696    | 21.02713333 |
| lpo7          | chr7:117161938-117198628 | 14.77511333 | 26.8671     |
| Mfap3         | chr11:57332166-57347319  | 14.77233333 | 11.35501    |
| D19Wsu162e    | chr19:46673595-46731879  | 14.75806667 | 11.59777333 |
| Maml1         | chr11:50069136-50105838  | 14.75664667 | 10.36694    |
| Polr1c        | chr17:46380868-46384994  | 14.75330667 | 22.57667333 |
| Birc3         | chr9:7848700-7873170     | 14.75055333 | 7.38665     |
| BC046331      | chr4:153349669-153381334 | 14.74937    | 7.340686667 |
| Ttll5         | chr12:87165899-87394710  | 14.74856667 | 14.34413333 |
| Ddhd2         | chr8:26835795-26864752   | 14.7483     | 15.32406667 |
| Tcte2         | chr17:13853442-13898401  | 14.74823333 | 7.28184     |
| Dmap1         | chr4:117347290-117354830 | 14.74384333 | 9.993820667 |
| 2610005L07Rik | chr8:19981359-20020392   | 14.73804    | 6.084853333 |
| Rps15a        | chr7:125247889-125259661 | 14.73723333 | 29.40326667 |
| Mbd5          | chr2:48805027-49172589   | 14.7321     | 23.19326667 |
| Homer1        | chr13:94074449-94174917  | 14.72726333 | 13.32373333 |
| Snx32         | chr19:5495277-5510489    | 14.72426667 | 6.717786667 |
| Zfp866        | chr8:72285222-72298810   | 14.72301    | 7.09079     |
| Kcnq1ot1      | chr7:150399015-150482452 | 14.71273333 | 16.84156667 |
| Coq9          | chr8:97362316-97378795   | 14.7122     | 13.57843333 |
| Snapc1        | chr12:75065516-75085807  | 14.71056667 | 22.98538    |
| Ablim2        | chr5:36100528-36227628   | 14.69819667 | 11.01334    |
| Nup153        | chr13:46775270-46823218  | 14.6935     | 18.21153333 |
| Fzd1          | chr5:4753838-4758216     | 14.68273333 | 26.7109     |
| Hexa          | chr9:59387473-59412912   | 14.68081    | 9.08451     |
| 2610001J05Rik | chr6:13819073-13821483   | 14.68026667 | 33.1205     |
| Rbm8a         | chr3:96433850-96437714   | 14.67531667 | 13.45501    |
| BC088983      | chr8:59010318-59029363   | 14.67208    | 3.260837333 |
| Gm20199       | chr9:59325551-59329548   | 14.66568667 | 18.63785667 |
| Dis3l         | chr9:64154562-64189064   | 14.665      | 10.73874333 |

|               |                           |             |             |
|---------------|---------------------------|-------------|-------------|
| Rnf123        | chr9:107954002-107981706  | 14.6614     | 11.84096667 |
| Lztr1         | chr16:17509063-17526423   | 14.64533333 | 7.980776667 |
| Arih2         | chr9:108505273-108551711  | 14.63991333 | 10.34335333 |
| Rbbp5         | chr1:134373943-134402242  | 14.6394     | 12.11478333 |
| Tcf7l2        | chr19:55816299-56008145   | 14.63203333 | 13.48289667 |
| Rwdd1         | chr10:33716360-33739422   | 14.6276     | 11.93159667 |
| Snrpb         | chr2:129997371-130005100  | 14.62247    | 29.68173333 |
| 2010320M18Rik | chr8:73300760-73301505    | 14.62149333 | 22.62932333 |
| Mettl5        | chr2:69709251-69723661    | 14.61713333 | 1.971893333 |
| Pcdhga2       | chr18:37828758-38001524   | 14.61070667 | 5.208534333 |
| Zfp148        | chr16:33380860-33503989   | 14.61006667 | 20.8685     |
| Vps13d        | chr4:144565039-144780495  | 14.6007     | 14.65016667 |
| Phf20         | chr2:156022382-156135689  | 14.5976     | 9.533616667 |
| N4bp1         | chr8:89365037-89409157    | 14.58736667 | 21.34943333 |
| Avpi1         | chr19:42197764-42203483   | 14.58497667 | 33.16846667 |
| Tor1b         | chr2:30808520-30814535    | 14.58299    | 15.9011     |
| 2010300C02Rik | chr1:37668520-37776656    | 14.5796     | 6.023956667 |
| Csrnp1        | chr9:119880283-119893776  | 14.57944    | 12.03562667 |
| Def6          | chr17:28344722-28365553   | 14.57397333 | 9.429513333 |
| Fbxo45        | chr16:32230197-32247111   | 14.5716     | 12.05516667 |
| Igf1          | chr10:87321800-87399792   | 14.56931667 | 2.640929333 |
| Nbas          | chr12:13275932-13590617   | 14.56763333 | 7.41809     |
| Pcif1         | chr2:164704867-164716937  | 14.56113333 | 9.04818     |
| C530005A16Rik | chr4:116262337-116270235  | 14.55232    | 4.501486667 |
| Cpne8         | chr15:90317911-90509819   | 14.55191333 | 8.659366667 |
| Aamp          | chr1:74326413-74331312    | 14.54936333 | 21.47236667 |
| Rab33b        | chr3:51287887-51300134    | 14.54896667 | 6.594786667 |
| Nsa2          | chr13:97899381-97907881   | 14.53953333 | 15.74650667 |
| Dhx57         | chr17:80637643-80689816   | 14.53896667 | 14.69476667 |
| Triap1        | chr5:115791255-115793561  | 14.52365667 | 22.41703333 |
| Siah2         | chr3:58478870-58496310    | 14.50807333 | 17.48125    |
| Metap1d       | chr2:71291394-71363248    | 14.50777333 | 32.59426667 |
| Snrpa1        | chr7:73205221-73219473    | 14.5009     | 10.69030667 |
| Ccdc101       | chr7:133792822-133816293  | 14.4931     | 14.39945    |
| Setd1a        | chr7:134920902-134943633  | 14.49098333 | 16.53283333 |
| Atp8b1        | chr18:64688632-64820654   | 14.49053333 | 31.25353333 |
| Gm20257       | chr1:58709484-58712675    | 14.48893667 | 4.920258333 |
| Stim1         | chr7:109416337-109585369  | 14.48843333 | 13.13901    |
| Appl1         | chr14:27732173-27783737   | 14.4883     | 12.78132333 |
| Rassf3        | chr10:120847406-120913306 | 14.48642667 | 16.80753333 |
| Ccs           | chr19:4825365-4839322     | 14.48594    | 10.76076    |
| Adar          | chr3:89518943-89557377    | 14.48443    | 11.96748667 |
| Mtfr1         | chr3:19087328-19120817    | 14.48253333 | 27.40383333 |
| Psrc1         | chr3:108186721-108191149  | 14.48236667 | 1.113433333 |
| Derl1         | chr15:57701056-57723973   | 14.48046667 | 18.04053333 |
| Txndc12       | chr4:108507282-108534724  | 14.4756     | 7.619978333 |
| Exosc9        | chr3:36451527-36464649    | 14.47303667 | 9.282513333 |
| Crnk1l        | chr2:145743217-145760436  | 14.4628     | 10.33125    |
| Dhx8          | chr11:101594269-101628671 | 14.46256667 | 5.071693333 |
| Rnf2          | chr1:153316535-153347953  | 14.46196667 | 14.8323     |
| Sgsm2         | chr11:74662765-74710582   | 14.46143333 | 16.65043333 |
| Slc38a10      | chr11:119965264-120012665 | 14.46038    | 18.63312667 |



|               |                           |             |             |
|---------------|---------------------------|-------------|-------------|
| Hnrnpa1       | chr15:103070862-103075386 | 14.45344667 | 17.36597667 |
| Cox4nb        | chr8:123177813-123192012  | 14.45165333 | 10.47022667 |
| Adpgk         | chr9:59139378-59164007    | 14.45096667 | 19.70122333 |
| Ap1b1         | chr11:4847523-4942797     | 14.44969    | 22.8456     |
| 5031434O11Rik | chr3:51363678-51371038    | 14.44921    | 5.360659    |
| Mier1         | chr4:102787069-102838354  | 14.4487     | 12.61639    |
| Narg2         | chr9:69245804-69280881    | 14.44464    | 28.412      |
| Rnpc3         | chr3:113307984-113333067  | 14.43986667 | 10.24435    |
| Pwp1          | chr10:85334575-85351848   | 14.43473333 | 24.51893333 |
| Arl4a         | chr12:40759877-40764574   | 14.43163333 | 17.90013667 |
| Tmx2          | chr2:84511473-84518204    | 14.42114    | 21.15463333 |
| Eif2b5        | chr16:20498889-20509398   | 14.4187     | 12.13439667 |
| Podxl2        | chr6:88792551-88824038    | 14.41805    | 27.3245     |
| Dgcr14        | chr16:17900801-17911441   | 14.41409    | 2.295744    |
| ldh1          | chr1:65205189-65233053    | 14.4121     | 20.47564667 |
| Gm14325       | chr2:177563695-177575023  | 14.41176667 | 4.736543333 |
| Mlx           | chr11:100948603-100953521 | 14.41113    | 24.98307333 |
| Arfrp1        | chr2:181092394-181100109  | 14.40783333 | 14.86493333 |
| Irs1          | chr1:82229679-82288014    | 14.40308    | 0.704573    |
| Mal           | chr2:127458961-127482431  | 14.39985667 | 13.79978527 |
| Sh3bgrl2      | chr9:83441944-83493898    | 14.3803     | 14.57028333 |
| Selenbp1      | chr3:94737004-94748680    | 14.37993667 | 53.9661     |
| Mrpl23        | chr7:149719021-149726647  | 14.37746667 | 12.96613667 |
| Man1a2        | chr3:100366126-100489396  | 14.37546667 | 18.87323333 |
| Znhit6        | chr3:145239171-145268209  | 14.37423333 | 9.53165     |
| Entpd2        | chr2:25251393-25256843    | 14.36833333 | 13.88018333 |
| Btbd3         | chr2:138082319-138113158  | 14.36806667 | 26.43016667 |
| Gm3258        | chr10:31133531-31134241   | 14.36633333 | 33.64273333 |
| Nomo1         | chr7:53289065-53339582    | 14.35773333 | 20.35453333 |
| Trim37        | chr11:86940578-87034184   | 14.35466667 | 13.24952    |
| Papss2        | chr19:32670204-32741677   | 14.35276667 | 4.243696667 |
| Gpr87         | chr3:58982844-58984007    | 14.34884333 | 36.15143333 |
| Mgat3         | chr15:80004150-80045949   | 14.34163333 | 30.09356667 |
| Bivm          | chr1:44176812-44201616    | 14.33652333 | 10.16525    |
| Ddx19a        | chr8:113498890-113521723  | 14.33643    | 9.57537     |
| Fxyd5         | chr7:31817741-31827341    | 14.33415667 | 4.99464     |
| Cdc42se2      | chr11:54530916-54601205   | 14.32708667 | 23.30623333 |
| Nudt9         | chr5:104476029-104494386  | 14.32562    | 18.89318    |
| Ccdc15        | chr9:37083419-37155977    | 14.32096333 | 6.98553     |
| Th            | chr7:150078680-150085871  | 14.31856667 | 5.26742     |
| Cdk8          | chr5:147043250-147114450  | 14.31851333 | 19.77063333 |
| Pak1          | chr7:104991448-105060891  | 14.31764333 | 30.75986667 |
| Ankrd49       | chr9:14584641-14587408    | 14.29936333 | 16.12802667 |
| Mnt           | chr11:74644425-74659227   | 14.29596667 | 8.162173333 |
| Gmfb          | chr14:47427823-47441917   | 14.29361333 | 22.2765     |
| Rap2c         | chrX:48357090-48371195    | 14.29092    | 22.80156667 |
| lffo1         | chr6:125095258-125111800  | 14.29030667 | 0.7185973   |
| Ing1          | chr8:11556065-11563250    | 14.2887     | 26.6113     |
| Csrp1         | chr1:137625773-137648806  | 14.28660667 | 62.80166667 |
| Rpa3          | chr6:8205935-8209141      | 14.28063333 | 4.400296667 |
| Nck2          | chr1:43502595-43627363    | 14.28056667 | 9.331543333 |
| Fes           | chr7:87522643-87532832    | 14.28006333 | 8.950426667 |

|               |                           |             |             |
|---------------|---------------------------|-------------|-------------|
| Macc1         | chr12:120681882-120705405 | 14.2782     | 14.96806667 |
| Epn2          | chr11:61330750-61393189   | 14.27803333 | 15.05133333 |
| Npnt          | chr3:132545658-132613255  | 14.2746     | 24.3943     |
| Arsb          | chr13:94541633-94712971   | 14.27453333 | 16.2844     |
| Erlec1        | chr11:30829783-30854131   | 14.273      | 20.4357     |
| 5430437P03Rik | chr8:73920753-73928671    | 14.26261667 | 7.24206667  |
| Vva5a         | chr9:38525852-38550922    | 14.26043333 | 8.774816667 |
| Lrrc1         | chr9:77278629-77392659    | 14.25650667 | 9.067753333 |
| Dedd          | chr1:173259275-173272632  | 14.25578333 | 12.52846667 |
| Cnot10        | chr9:114494991-114549318  | 14.2547     | 6.97107     |
| Snora78       | chr17:24856620-24856777   | 14.2538     | 4.2501      |
| Ddah2         | chr17:35195979-35199044   | 14.25242333 | 14.37624333 |
| Zbtb41        | chr1:141318959-141349584  | 14.25023333 | 20.5305     |
| Eftud2        | chr11:102699785-102742289 | 14.24896667 | 11.13968333 |
| Chrac1        | chr15:72920841-72924505   | 14.24837    | 26.81296667 |
| Dgkh          | chr14:78969415-79124896   | 14.2471     | 8.07645     |
| Foxk1         | chr5:142877450-142937969  | 14.23026667 | 18.29063333 |
| Pgrmc2        | chr3:40870247-40886968    | 14.22726333 | 14.48290667 |
| Pex6          | chr17:46848411-46862490   | 14.22419667 | 8.02644     |
| Xab2          | chr8:3610089-3621296      | 14.22332    | 11.10199    |
| Rsl24d1       | chr9:72961275-72971140    | 14.22040333 | 13.94085    |
| Dnajb12       | chr10:59342338-59360764   | 14.21036667 | 17.09756667 |
| Acat1         | chr9:53388626-53418455    | 14.20915    | 19.1006     |
| Arc           | chr15:74499512-74503000   | 14.18989667 | 23.54173333 |
| Tnfsf10       | chr3:27215998-27238587    | 14.18688    | 16.00713    |
| Add3          | chr19:53214934-53321889   | 14.17034333 | 12.30373333 |
| Klh7          | chr5:23606407-23667049    | 14.15916    | 24.8848     |
| Mynn          | chr3:30501008-30517416    | 14.1501     | 16.37978667 |
| Bbs1          | chr19:4886881-4906627     | 14.1466     | 8.988063333 |
| Ptch1         | chr13:63612840-63666828   | 14.14644    | 22.4164     |
| Sox21         | chr14:118632455-118636252 | 14.14529    | 22.0647     |
| 4933421E11Rik | chr3:106487904-106539494  | 14.14290333 | 4.96586     |
| Zswim7        | chr11:62080725-62094897   | 14.14108333 | 6.718366667 |
| Fgf9          | chr14:58691522-58731557   | 14.1382     | 6.47727     |
| Trib3         | chr2:152163160-152169796  | 14.13738667 | 0.085325867 |
| Rabl2         | chr15:89412957-89422354   | 14.1314     | 13.07781333 |
| Tnni3         | chr7:4469909-4474045      | 14.12544    | 77.74463333 |
| Ubfd1         | chr7:129210711-129225713  | 14.12313333 | 11.86348333 |
| Phactr2       | chr10:12927522-13194202   | 14.12123333 | 17.72089    |
| Zfp512        | chr5:31754808-31784126    | 14.10846667 | 15.19573333 |
| Zbtb44        | chr9:30838228-30883470    | 14.10228    | 25.3043     |
| Yipf5         | chr18:40364518-40379053   | 14.0969     | 24.0728     |
| Dusp7         | chr9:106270962-106278054  | 14.09367667 | 19.82074    |
| Arhgap17      | chr7:130422662-130513429  | 14.0891     | 14.11663333 |
| Pcgf6         | chr19:47108108-47125335   | 14.08663333 | 9.956186667 |
| Serf1         | chr13:100877973-100884188 | 14.08036667 | 22.96126667 |
| Sec13         | chr6:113678045-113690675  | 14.07736667 | 17.45533333 |
| 0610009L18Rik | chr11:120209991-120212504 | 14.06993    | 9.53456     |
| Ubr7          | chr12:103996184-104015911 | 14.06625667 | 9.593453333 |
| Zfp617        | chr8:74446723-74458529    | 14.06372    | 14.63986667 |
| Gm5741        | chr8:87591466-87591881    | 14.05866667 | 15.82586667 |
| 2210417K05Rik | chr10:61803354-61812614   | 14.05782667 | 17.433      |

|               |                           |             |             |
|---------------|---------------------------|-------------|-------------|
| Mrps27        | chr13:100114740-100185516 | 14.05747667 | 5.64604     |
| Cdh11         | chr8:105156894-105309011  | 14.05251667 | 85.2265     |
| Shroom2       | chrX:149044051-149204004  | 14.0453     | 15.0979     |
| lbtck         | chr9:85580966-85642941    | 14.04521    | 15.21838667 |
| Fam172a       | chr13:77847950-78305501   | 14.03948    | 14.61546667 |
| Exph5         | chr9:53109774-53189263    | 14.03316667 | 19.22603333 |
| 5730403B10Rik | chr16:4765460-4789935     | 14.0317     | 15.91946667 |
| Krit1         | chr5:3803164-3844515      | 14.03026667 | 13.43546667 |
| 2210009G21Rik | chr2:136716953-136895514  | 14.02953333 | 12.29436667 |
| Actr10        | chr12:72038843-72065704   | 14.02932333 | 10.89102667 |
| Pnpt1         | chr11:29030750-29061828   | 14.02774667 | 15.93573333 |
| Arl1          | chr10:88194158-88205947   | 14.02573    | 17.79336667 |
| Glt25d1       | chr8:74134922-74148810    | 14.02487    | 33.8918     |
| BC027231      | chr16:44724413-44737397   | 14.01833333 | 8.639593333 |
| Dusp8         | chr7:149265391-149281189  | 14.00926667 | 11.23078333 |
| Gmps          | chr3:63780064-63823000    | 14.00792333 | 20.13068    |
| Map2k4        | chr11:65501745-65601799   | 14.00766667 | 19.84806667 |
| 2010011I20Rik | chr2:172171076-172181249  | 14.00696667 | 18.0572     |
| Slc9a1        | chr4:132925686-132979613  | 14.0001     | 14.00026667 |
| Igf2r         | chr17:12875271-12962572   | 13.99306667 | 14.78656667 |
| Mavs          | chr2:131059798-131073760  | 13.98741667 | 20.8972     |
| Cog1          | chr11:113510842-113523715 | 13.98223333 | 16.05633    |
| Gja1          | chr10:56097105-56110225   | 13.98037    | 45.80613333 |
| Btbd9         | chr17:30352468-30713232   | 13.9731     | 13.55346667 |
| Taf1b         | chr12:25183445-25243436   | 13.9652     | 10.04597667 |
| Otud6b        | chr4:14736651-14753734    | 13.96503333 | 11.63701667 |
| Rab15         | chr12:77898949-77923511   | 13.9623     | 22.4199     |
| Prr12         | chr7:52283076-52308251    | 13.96100667 | 9.609603333 |
| Kcnrg         | chr14:62226293-62231670   | 13.95969333 | 30.55263333 |
| 1700113A16Rik | chr3:87975481-87981707    | 13.94966    | 13.14484    |
| Cep110        | chr2:34965011-35034342    | 13.94586667 | 9.319836667 |
| Slc25a28      | chr19:43738291-43749371   | 13.94466667 | 19.32366667 |
| Trappc10      | chr10:77649470-77707387   | 13.93196667 | 22.13903333 |
| Arl16         | chr11:120325639-120328914 | 13.92934333 | 11.84707667 |
| Uck2          | chr1:169156216-169215258  | 13.92834    | 15.31263333 |
| Sp2           | chr11:96814651-96839002   | 13.92439667 | 17.0103     |
| Med31         | chr11:72025225-72029094   | 13.92111    | 9.737193333 |
| Il33          | chr19:29999603-30035205   | 13.91987667 | 1.756392167 |
| Dscaml1       | chr9:45238375-45561796    | 13.91853333 | 1.3302092   |
| Tesk1         | chr4:43455148-43460947    | 13.91783333 | 7.827273333 |
| Slc35d1       | chr4:102844322-102887489  | 13.91683333 | 17.55696667 |
| Stim2         | chr5:54389761-54512296    | 13.9136     | 15.70672667 |
| Hist2h2bb     | chr3:96073622-96074115    | 13.91290333 | 4.00342     |
| Pim2          | chrX:7455431-7460558      | 13.90794667 | 23.4744     |
| Zfp873        | chr10:81510871-81524331   | 13.90608333 | 10.27756    |
| Zxdc          | chr6:90319487-90353480    | 13.90076667 | 18.26686667 |
| Dot1l         | chr10:80217950-80257092   | 13.89833333 | 8.806423333 |
| Ngrn          | chr7:87406100-87410264    | 13.89373    | 9.84961     |
| Adrm1         | chr2:179906292-179910988  | 13.89303    | 14.25066667 |
| Ube3c         | chr5:29895781-30002617    | 13.88953333 | 20.82143333 |
| Fam40a        | chr3:107415449-107434628  | 13.88346667 | 17.52115333 |
| 1700092M07Rik | chr19:8815207-8815715     | 13.88315    | 0           |

|               |                           |             |             |
|---------------|---------------------------|-------------|-------------|
| Mex3c         | chr18:73732358-73752232   | 13.87304    | 13.50212333 |
| Tomm70a       | chr16:57121826-57154643   | 13.87276667 | 23.13746667 |
| Ttc33         | chr15:5135559-5168332     | 13.86975333 | 9.283536667 |
| Fam84b        | chr15:60650550-60656635   | 13.86891667 | 12.13664    |
| Luzp1         | chr4:136025675-136105233  | 13.86246667 | 21.88743333 |
| Tubgcp4       | chr2:120996941-121022854  | 13.86049    | 13.90628333 |
| Smok4a        | chr17:13714321-13721300   | 13.85726667 | 2.983436667 |
| Ss18l1        | chr2:179777187-179804906  | 13.85286667 | 17.84876667 |
| Tmem205       | chr9:21725452-21731979    | 13.84697667 | 10.61922667 |
| Afg3l2        | chr18:67564417-67608790   | 13.84483333 | 19.7368     |
| 4930563F08Rik | chr5:132356138-132359638  | 13.83568    | 6.005003333 |
| Cyp2j9        | chr4:96235119-96258176    | 13.83516667 | 3.978613333 |
| Atp13a1       | chr8:72315061-72331647    | 13.82626667 | 15.29076667 |
| Top3b         | chr16:16870983-16893079   | 13.82616333 | 16.03423333 |
| Lamb2         | chr9:108382192-108392861  | 13.82476667 | 24.1133     |
| Msra          | chr14:64741457-65074740   | 13.82398667 | 1.426009667 |
| S100a16       | chr3:90345144-90347073    | 13.81877333 | 75.6433     |
| 4930579K19Rik | chr9:98462878-98464030    | 13.8176     | 1.215976333 |
| Slc7a6os      | chr8:108724337-108734833  | 13.80935333 | 12.55616667 |
| Papd5         | chr8:90723111-90783621    | 13.8045     | 16.8608     |
| Tspan14       | chr14:41719732-41780096   | 13.79823    | 30.93056667 |
| Sfswap        | chr5:130007105-130077259  | 13.79573333 | 10.66897    |
| Stx17         | chr4:48137790-48199378    | 13.79449333 | 9.591316667 |
| Anks3         | chr16:4941419-4964330     | 13.79239333 | 4.48945     |
| Pvr           | chr7:20488926-20506492    | 13.79130667 | 4.88152     |
| Uhrf1bp1l     | chr10:89207735-89282614   | 13.78056667 | 22.00733333 |
| Zfp672        | chr11:58128615-58143841   | 13.77956667 | 12.14713333 |
| Thap7         | chr16:17528074-17531145   | 13.77429    | 16.67181    |
| Gjb2          | chr14:57717438-57723539   | 13.7679     | 35.26606667 |
| Rpl30         | chr15:34370262-34373031   | 13.7661     | 16.23522667 |
| Gm5512        | chr19:12979720-12981475   | 13.76559    | 13.38754333 |
| Nit2          | chr16:57156777-57167445   | 13.76077    | 3.709506667 |
| Npc2          | chr12:86095508-86114062   | 13.75606333 | 19.1205     |
| Kdsr          | chr1:108616986-108656319  | 13.75526667 | 15.31700333 |
| Pycard        | chr7:135134886-135137381  | 13.75069    | 29.40063333 |
| Pi4k2a        | chr19:42164924-42196708   | 13.75032333 | 12.43712667 |
| Zgpat         | chr2:181099635-181115498  | 13.74936333 | 7.672366667 |
| Stxbp5        | chr10:9475344-9620838     | 13.7453     | 18.1416     |
| Hiatl1        | chr13:65166337-65214290   | 13.73683333 | 10.57281333 |
| Sesn1         | chr10:41530379-41628242   | 13.73273333 | 10.97000333 |
| Cstf2         | chrX:130593887-130621360  | 13.73066667 | 23.7664     |
| Pcdhga11      | chr18:37915426-38001526   | 13.72870667 | 5.158246667 |
| Fbxo44        | chr4:147526908-147534173  | 13.71603333 | 8.17157     |
| Pmepa1        | chr2:173049965-173102034  | 13.71343333 | 13.86296667 |
| Eri1          | chr8:36528318-36558587    | 13.7117     | 21.13096667 |
| Ireb2         | chr9:54711561-54760341    | 13.70474667 | 17.3503     |
| Wars          | chr12:110098239-110132384 | 13.70446667 | 23.9279     |
| Sesn2         | chr4:132048721-132066371  | 13.69897333 | 9.207723333 |
| Ica1          | chr6:8580526-8728484      | 13.69598    | 4.296812333 |
| Mbd1          | chr18:74427941-74442338   | 13.69439333 | 4.92638     |
| Usp21         | chr1:173212083-173218092  | 13.69361333 | 10.66110667 |
| Ptger1        | chr8:86190538-86194002    | 13.6924     | 22.676      |

|               |                           |             |             |
|---------------|---------------------------|-------------|-------------|
| Sys1          | chr2:164286470-164291010  | 13.69095    | 16.38463333 |
| Mlxip         | chr5:123844827-123907940  | 13.68976667 | 31.09533333 |
| 2310008H09Rik | chr7:125985731-125999512  | 13.68683333 | 21.49096667 |
| Mrps2         | chr2:28323585-28326697    | 13.68530667 | 8.815403333 |
| Mrpl37        | chr4:106728478-106739471  | 13.67996    | 15.59608    |
| Mrpl3         | chr9:104955597-104979806  | 13.67748333 | 3.75958     |
| Mcoln3        | chr3:145784754-145803610  | 13.67243333 | 0.3633591   |
| Thap2         | chr10:114807021-114821491 | 13.6685     | 8.766613333 |
| Hs3st3a1      | chr11:64248833-64336337   | 13.66763667 | 8.893906667 |
| Thoc5         | chr11:4795345-4828868     | 13.66460333 | 11.15895333 |
| A930004D18Rik | chr2:17946815-17959368    | 13.66213333 | 1.593189333 |
| Tjp3          | chr10:80735944-80754012   | 13.65848    | 13.34996    |
| Gm5478        | chr15:101473450-101477811 | 13.65599    | 27.62296667 |
| Snrpb2        | chr2:142888804-142897788  | 13.65540333 | 20.3701     |
| Zcchc11       | chr4:108132030-108232020  | 13.64003333 | 14.79663333 |
| Stard3nl      | chr13:19449544-19487621   | 13.63833    | 22.782      |
| Pofut2        | chr10:76722044-76732331   | 13.63663333 | 9.971976667 |
| Card6         | chr15:5047438-5058533     | 13.63582333 | 6.001963333 |
| Mterfd1       | chr13:67013033-67034008   | 13.63459667 | 11.15928667 |
| Ctr9          | chr7:118172464-118199891  | 13.61986667 | 17.17431    |
| Raph1         | chr1:60540028-60623609    | 13.6138     | 12.51373    |
| Hopx          | chr5:77516010-77544148    | 13.61290333 | 32.92853333 |
| Rfc2          | chr5:135058559-135074198  | 13.6116     | 15.84630333 |
| Map2k3        | chr11:60745558-60766305   | 13.6088     | 18.0287     |
| Mitd1         | chr1:37935734-37947256    | 13.60876667 | 4.237206667 |
| Erc1          | chr7:19930419-19941873    | 13.60793333 | 10.20795333 |
| Adprh         | chr16:38445478-38452769   | 13.60765333 | 16.15382333 |
| Zfp605        | chr5:110539110-110558813  | 13.60709    | 4.879496667 |
| 6530439I21    | chr1:138024295-138027760  | 13.59848    | 0.144421667 |
| Rfc5          | chr5:117829153-117839032  | 13.59072    | 0.999369667 |
| Aak1          | chr6:86799510-86953221    | 13.58591667 | 9.99014     |
| Ugp2          | chr11:21221144-21270882   | 13.58453333 | 15.10753333 |
| Bsl2          | chr19:8911956-8923173     | 13.58381333 | 17.47066667 |
| Sugt1         | chr14:79987497-80029562   | 13.58323333 | 10.06805667 |
| Fam164a       | chr3:7503425-7553848      | 13.57756667 | 11.49743333 |
| Slc36a1       | chr11:55017841-55049832   | 13.57099333 | 9.60246     |
| D6Wsu163e     | chr6:126889983-126925722  | 13.56936667 | 6.362343333 |
| Glcc1         | chr6:8459595-8547548      | 13.56798667 | 3.342766667 |
| Pcdhgb2       | chr18:37849512-38001526   | 13.56739667 | 4.090323333 |
| Prkc2         | chr4:154634228-154735500  | 13.56463333 | 9.612133333 |
| Tsen15        | chr1:154217865-154233812  | 13.56281667 | 7.39423     |
| Btaf1         | chr19:37000568-37088547   | 13.55963333 | 14.8173     |
| Gss           | chr2:155388918-155418442  | 13.5551     | 21.55733333 |
| Rcan1         | chr16:92392197-92466391   | 13.55333667 | 6.884366667 |
| Mgat4b        | chr11:50038836-50048605   | 13.55132    | 40.4754     |
| Spata2        | chr2:167306635-167318374  | 13.55036667 | 15.4866     |
| Lrrc41        | chr4:115748069-115769648  | 13.54947333 | 25.88336667 |
| Orc6          | chr8:87823530-87832178    | 13.54718333 | 10.34473667 |
| 3110043O21Rik | chr4:35138530-35173129    | 13.54615333 | 12.59974    |
| Nans          | chr4:46502200-46516310    | 13.54239333 | 6.13972     |
| Rela          | chr19:5637489-5648130     | 13.54142    | 16.14799333 |
| Agbl5         | chr5:31191224-31209039    | 13.54054333 | 12.24835667 |

|               |                           |             |             |
|---------------|---------------------------|-------------|-------------|
| Fem1c         | chr18:46664259-46685625   | 13.53526667 | 14.08870667 |
| Prrc1         | chr18:57514386-57552373   | 13.53523333 | 13.57036667 |
| Rpl34-ps1     | chr3:130429754-130433247  | 13.53163705 | 5.527457401 |
| Arfip2        | chr7:112782714-112788930  | 13.52099    | 10.56758667 |
| Dus3l         | chr17:56904173-56909516   | 13.5207     | 10.15085667 |
| Agpat3        | chr10:77734307-77814445   | 13.51579667 | 18.32593333 |
| Gm16973       | chr14:57315111-57319837   | 13.50906    | 10.86470667 |
| Lyplal1       | chr1:187911610-187941189  | 13.50682333 | 38.14353333 |
| Pnpla8        | chr12:45370140-45414422   | 13.5044     | 15.12406333 |
| Bfar          | chr16:13671950-13703705   | 13.50157    | 11.54676667 |
| Ldoc1         | chrX:58962790-58964125    | 13.50141333 | 0.35886     |
| Krr1          | chr10:111409750-111425486 | 13.49402    | 11.35685333 |
| Acs1          | chr8:47556395-47621404    | 13.4921     | 36.46566667 |
| Rbm33         | chr5:28643728-28745782    | 13.4886     | 17.22686667 |
| Hmgb3         | chrX:68809167-68813829    | 13.48813    | 21.997      |
| Ncapd3        | chr9:26837759-26902900    | 13.48683333 | 7.451703333 |
| Tmem67        | chr4:11966503-12015104    | 13.48590667 | 21.44372667 |
| Zbtb1         | chr12:77471252-77489734   | 13.48476667 | 11.1543     |
| Rgl2          | chr17:34066838-34074632   | 13.47878    | 19.34263333 |
| Mrps35        | chr6:146991291-147019424  | 13.47810333 | 8.138272667 |
| Ddx19b        | chr8:113527085-113555651  | 13.45662333 | 11.9763     |
| Aatf          | chr11:84236357-84327003   | 13.44756    | 18.57856667 |
| Zc3h6         | chr2:128793137-128844299  | 13.44653333 | 4.527416667 |
| Terf2ip       | chr8:114535258-114544428  | 13.44147667 | 12.50431667 |
| Acvr1b        | chr15:101004555-101043032 | 13.43915    | 15.0664     |
| Zdhhc6        | chr19:55372788-55390522   | 13.43667333 | 16.98053333 |
| Necap2        | chr4:140622426-140634260  | 13.43341333 | 12.74622667 |
| Myst2         | chr11:95133166-95171560   | 13.42909    | 16.61523333 |
| Pmvk          | chr3:89263039-89272931    | 13.42646333 | 17.16354333 |
| Dnajc14       | chr10:128242731-128256502 | 13.42607333 | 12.52425333 |
| 1110008L16Rik | chr12:56403623-56483478   | 13.42538    | 27.78635333 |
| Qpctl         | chr7:19725565-19734545    | 13.42316667 | 11.31149    |
| Stk30         | chr12:112046007-112079149 | 13.41716667 | 8.123726667 |
| Tdrd3         | chr14:87816389-87945315   | 13.41601333 | 21.89683333 |
| Ssh1          | chr5:114392227-114443766  | 13.4149     | 2.305737667 |
| Eya3          | chr4:132194960-132280678  | 13.41452667 | 13.41515333 |
| Gm14326       | chr2:177677315-177691994  | 13.41083333 | 6.022413333 |
| Lrch1         | chr14:75154479-75347684   | 13.40886667 | 8.716183333 |
| Gpr89         | chr3:96674988-96709221    | 13.39956333 | 8.204946667 |
| Fkbp9         | chr6:56782052-56829354    | 13.3991     | 12.29685333 |
| Mn1           | chr5:111847185-111886045  | 13.39506667 | 8.765943333 |
| Dennd2d       | chr3:106285348-106303972  | 13.39371667 | 5.659456667 |
| Gpd2          | chr2:57090088-57223130    | 13.38886667 | 14.20993333 |
| Slc35a4       | chr18:36838868-36843516   | 13.38724    | 15.87696667 |
| Mid2          | chrX:137212566-137302254  | 13.38676667 | 20.65566667 |
| Zfp64         | chr2:168750860-168781087  | 13.3851     | 12.58139667 |
| Setdb1        | chr3:95127446-95161124    | 13.38323667 | 19.31636667 |
| Pxmp3         | chr3:5560187-5576239      | 13.37662333 | 9.61914     |
| Pycl          | chr15:75746892-75751990   | 13.37596667 | 10.50613333 |
| Ldlrad3       | chr2:101790357-102026534  | 13.37334667 | 23.18046667 |
| Stk16         | chr1:75207403-75212181    | 13.37203333 | 12.84344333 |
| Pdcl          | chr2:37205593-37214852    | 13.37071    | 13.6495     |

|               |                           |             |             |
|---------------|---------------------------|-------------|-------------|
| D330041H03Rik | chr17:24546425-24551458   | 13.36881667 | 13.86554333 |
| BC031781      | chr1:182781281-182798245  | 13.36014333 | 17.1947     |
| Terf1         | chr1:15795738-15833510    | 13.35721333 | 13.16942333 |
| Wdr59         | chr8:113972683-114046007  | 13.35703333 | 10.05551    |
| Chd3          | chr11:69157852-69182893   | 13.35613333 | 17.64660667 |
| Rnf32         | chr5:29524545-29551831    | 13.35227    | 10.65155333 |
| Cln6          | chr9:62686593-62699809    | 13.34864667 | 7.673733333 |
| BC018507      | chr13:70727566-70776512   | 13.34763333 | 13.7848     |
| B4galt1       | chr4:40751634-40801031    | 13.34637333 | 12.62188    |
| Tfap2a        | chr13:40811043-40829192   | 13.34633333 | 19.56946667 |
| Lpp           | chr16:24393435-24992664   | 13.34597667 | 24.8183     |
| Cyp51         | chr5:4080673-4104697      | 13.33928    | 32.92703333 |
| Ggh           | chr4:19969198-19993258    | 13.3363     | 44.99756667 |
| Ptpn12        | chr5:20492462-20561615    | 13.3291     | 24.41626667 |
| Gpx2-ps1      | chr7:107413053-107414071  | 13.32627333 | 12.18582667 |
| Myo5a         | chr9:74919012-75071494    | 13.32243333 | 11.10206333 |
| Pknox1        | chr17:31701717-31744638   | 13.32125    | 8.27815     |
| Zrsr1         | chr11:22872004-22876496   | 13.31672333 | 8.188323333 |
| Trak2         | chr1:58957293-59030326    | 13.31500333 | 20.7233     |
| Mrpl19        | chr6:81907839-81915943    | 13.30703333 | 10.11574    |
| Fbxl4         | chr4:22284711-22361193    | 13.29378333 | 7.18321     |
| Cln4-2        | chr7:7235026-7252222      | 13.29263333 | 19.2545     |
| Pcbp3         | chr10:76224598-76424692   | 13.28994    | 5.455616667 |
| Tmem184a      | chr5:140280905-140290237  | 13.28466667 | 46.222      |
| Glul          | chr1:155747074-155756844  | 13.28447333 | 24.6775     |
| Tbl1xr1       | chr3:21975573-22115516    | 13.28296667 | 15.41246667 |
| Praf2         | chrX:7305696-7308189      | 13.27714333 | 16.17951667 |
| Fam168a       | chr7:107855215-107990144  | 13.2752     | 17.59403333 |
| Abcc5         | chr16:20331376-20426467   | 13.27419    | 7.758616667 |
| Rora          | chr9:68501608-69226835    | 13.2735     | 15.35264    |
| Timm23        | chr14:32993351-33015077   | 13.2712     | 22.741      |
| Slc2a4rg-ps   | chr2:181118954-181122301  | 13.2672     | 8.468883333 |
| Slc39a7       | chr17:34165210-34168635   | 13.2665     | 16.98226667 |
| Alg3          | chr16:20605530-20610822   | 13.26613333 | 25.96996667 |
| Ap4s1         | chr12:52791952-52839926   | 13.25831333 | 19.74473333 |
| Naa30         | chr14:49791901-49810706   | 13.25778333 | 7.80464     |
| Rn4.5s        | chr6:47626562-47626736    | 13.24826    | 38.16526667 |
| Hddc2         | chr10:31033210-31047892   | 13.24688667 | 19.9491     |
| Fam63a        | chr3:95086856-95100086    | 13.24303333 | 28.9215     |
| Mospd1        | chrX:50698197-50723669    | 13.24183333 | 13.84833333 |
| Cdyl          | chr13:35751730-35965933   | 13.23657667 | 3.2767      |
| Cbfa2t3       | chr8:125149035-125223009  | 13.23604667 | 16.55253333 |
| Csrnp3        | chr2:65683823-65869603    | 13.23483333 | 7.169703333 |
| Mrpl46        | chr7:85920226-85927975    | 13.23470667 | 9.169056667 |
| Itgb4         | chr11:115836038-115869725 | 13.23181667 | 29.23893333 |
| Ttc8          | chr12:100158783-100221448 | 13.23146333 | 10.94912333 |
| N6amt2        | chr14:58168434-58190406   | 13.22466333 | 15.47288333 |
| 1110067D22Rik | chr11:20723357-20731111   | 13.21733333 | 37.27516667 |
| Parva         | chr7:119571219-119735202  | 13.21394667 | 25.4919     |
| Adrbk1        | chr19:4286000-4305955     | 13.2139     | 11.00786333 |
| Alyref2       | chr1:173433608-173434881  | 13.20837667 | 1.572893333 |
| Zfp236        | chr18:82762988-82862126   | 13.20671667 | 7.676496667 |

|               |                           |             |             |
|---------------|---------------------------|-------------|-------------|
| Stard10       | chr7:108469832-108494826  | 13.20528667 | 23.64162667 |
| Spred2        | chr11:19824444-19922600   | 13.19843333 | 14.23241    |
| Stk3          | chr15:34805253-35085561   | 13.1934     | 13.09093    |
| 2300009A05Rik | chr9:63242253-63247051    | 13.18823333 | 22.59096333 |
| Ablim1        | chr19:57107753-57290522   | 13.18673333 | 25.7397     |
| Map3k4        | chr17:12420486-12511526   | 13.18572333 | 11.45811667 |
| Pcdhga4       | chr18:37845053-38001524   | 13.18449667 | 1.732405333 |
| Nipal2        | chr15:34502553-34608461   | 13.18094333 | 45.462      |
| 0610037L13Rik | chr4:107562503-107570407  | 13.17655667 | 23.56873333 |
| Rhoc          | chr3:104591951-104597377  | 13.17622    | 0.562185667 |
| Tubg2         | chr11:101017197-101023101 | 13.17303    | 18.22436667 |
| Hibadh        | chr6:52496223-52590294    | 13.17240333 | 18.55072667 |
| Pdhx          | chr2:102861212-102913670  | 13.17172333 | 4.458966667 |
| Derl2         | chr11:70820946-70832765   | 13.17057333 | 15.61476667 |
| Ncf2          | chr1:154655019-154684120  | 13.16696333 | 2.653585333 |
| Gfm1          | chr3:67234036-67278990    | 13.16463667 | 16.63443333 |
| Eif3j         | chr2:121854358-121879365  | 13.16112333 | 20.6729     |
| Josd2         | chr7:51723349-51727028    | 13.16026    | 12.05035933 |
| Nup43         | chr10:7387301-7398684     | 13.15959333 | 16.02379333 |
| Ptpla         | chr2:13948457-13977662    | 13.15813    | 3.087847667 |
| Pcdhgc5       | chr18:37979199-38001526   | 13.1505     | 3.366237667 |
| Phka2         | chrX:156940097-157036810  | 13.15003333 | 10.95497333 |
| Tmem138       | chr19:10645374-10651587   | 13.14712    | 11.31473333 |
| Ppfibp2       | chr7:114738564-114892097  | 13.14693667 | 13.9604     |
| Atxn1l        | chr8:112250350-112261639  | 13.14606667 | 9.299533333 |
| Cyp4f13       | chr17:33061632-33084306   | 13.14566667 | 7.616636667 |
| 4930515G01Rik | chr5:115223741-115224992  | 13.14366    | 1.170771    |
| Dip2c         | chr13:9275770-9668172     | 13.14255    | 11.41833333 |
| Ctdp1         | chr18:80604697-80666406   | 13.14083333 | 10.54582    |
| 1700007K13Rik | chr2:28317520-28321844    | 13.14060333 | 1.87159     |
| Dab1          | chr4:104040164-104417447  | 13.13862333 | 4.698413467 |
| 2810422J05Rik | chr8:73037294-73047079    | 13.13701333 | 23.6556     |
| Hdac4         | chr1:93829331-94044970    | 13.13156    | 14.42242667 |
| Dhrs7         | chr12:73751339-73765815   | 13.13144333 | 4.351176667 |
| Rest          | chr5:77694518-77712722    | 13.1282     | 17.487      |
| Zfp146        | chr7:30946286-30954746    | 13.12054    | 16.78370667 |
| Inpp5e        | chr2:26251768-26264708    | 13.11661333 | 12.76763333 |
| Snhg7         | chr2:26492695-26495764    | 13.11623333 | 26.48046667 |
| Mak16         | chr8:32269939-32279196    | 13.10991333 | 19.92316667 |
| Klf13         | chr7:71031236-71083801    | 13.10749    | 12.80446667 |
| Rundc1        | chr11:101286398-101296979 | 13.10682667 | 11.01258333 |
| Rnf126        | chr10:79221259-79229697   | 13.10643    | 15.53626    |
| Nfia          | chr4:97248633-97785567    | 13.10563333 | 10.35262667 |
| Fam120c       | chrX:147778765-147908677  | 13.1034     | 9.724213333 |
| Cdc40         | chr10:40551426-40602949   | 13.09396667 | 11.6807     |
| Ppp1r3e       | chr14:55494433-55496375   | 13.09275333 | 8.493213333 |
| Uimc1         | chr13:55129240-55201656   | 13.0854     | 13.95056    |
| Cars2         | chr8:11514016-11550771    | 13.07880667 | 7.928216667 |
| Herc4         | chr10:62706544-62780629   | 13.0785     | 13.57577333 |
| Ltbr          | chr6:125256588-125263888  | 13.0782     | 8.651336667 |
| Hist1h2bk     | chr13:22127755-22128136   | 13.0767     | 22.01173333 |
| Gpcpd1        | chr2:132354818-132403984  | 13.07095667 | 16.9339     |



|               |                           |             |             |
|---------------|---------------------------|-------------|-------------|
| Arl6ip6       | chr2:53051117-53078255    | 13.0681     | 12.16766667 |
| Gpc4          | chrX:49406194-49518100    | 13.065957   | 8.367486333 |
| Rcc1          | chr4:131887833-131901665  | 13.0655     | 5.760756667 |
| Sfi1          | chr11:3031852-3093466     | 13.0642     | 5.020286667 |
| Arid1b        | chr17:4995073-5347656     | 13.06404333 | 10.11451667 |
| Phospho2      | chr2:69627793-69635225    | 13.06259333 | 18.60924667 |
| Dlgap4        | chr2:156439440-156590099  | 13.04821667 | 23.96303333 |
| Zdhhc21       | chr4:82444641-82505565    | 13.03535333 | 13.64629667 |
| Nup214        | chr2:31829969-31909495    | 13.0352     | 24.3865     |
| Gadd45g       | chr13:51942043-51943843   | 13.03179    | 73.67406667 |
| Fam108a       | chr10:80046393-80053086   | 13.02812    | 9.458083333 |
| Tmem87a       | chr2:120181044-120229852  | 13.02257333 | 17.1812     |
| Arhgap27      | chr11:103192797-103225006 | 13.02190667 | 11.99426667 |
| Ifi35         | chr11:101309725-101320015 | 13.02132333 | 5.059816667 |
| Exosc8        | chr3:54532600-54539286    | 13.02063    | 5.27037     |
| Unk           | chr11:115891635-115922508 | 13.01796667 | 10.33881333 |
| 2900026A02Rik | chr5:113515342-113592333  | 13.01673333 | 10.49668    |
| Wdtdc1        | chr4:132848380-132895230  | 13.01230667 | 8.198043333 |
| Ulk3          | chr9:57437258-57444040    | 13.0109     | 12.30184    |
| Eef2k         | chr7:127986368-128050733  | 13.00843    | 19.7684     |
| Faf2          | chr13:54723144-54765424   | 13.0012     | 17.05353333 |
| Ldoc1l        | chr15:84383827-84388253   | 12.99974667 | 9.18106     |
| Cwc27         | chr13:105421406-105607033 | 12.99937333 | 25.51073333 |
| Cpeb2         | chr5:43624701-43680963    | 12.9941     | 19.3766     |
| Hsbp1l1       | chr18:80426494-80443841   | 12.99063333 | 38.06826667 |
| Arhgef16      | chr4:153652578-153674004  | 12.98827667 | 11.04869667 |
| Tshz3         | chr7:37483136-37558476    | 12.98150667 | 9.833043333 |
| Prcc          | chr3:87662824-87689484    | 12.97984    | 12.70102667 |
| Ppp2r5e       | chr12:76551867-76697187   | 12.97848    | 11.72266667 |
| Lrrc45        | chr11:120575266-120582441 | 12.97077667 | 14.836      |
| Bcl6          | chr16:23965137-23988698   | 12.9701     | 16.40206667 |
| lft88         | chr14:58042907-58136773   | 12.96983333 | 14.94553    |
| E130309D02Rik | chr5:144062750-144077039  | 12.95933667 | 16.0665     |
| Creld1        | chr6:113433562-113443332  | 12.9579     | 12.71446333 |
| Trps1         | chr15:50486304-50721587   | 12.9534     | 46.5209     |
| Tbc1d22a      | chr15:86044888-86328933   | 12.95155    | 13.82055    |
| Mrpl28        | chr17:26260447-26263558   | 12.94791    | 13.90874333 |
| Eps8l1        | chr7:4416343-4430844      | 12.94200333 | 3.310913333 |
| Rcn2          | chr9:55889651-55906890    | 12.93626    | 22.91433333 |
| Taf8          | chr17:47624998-47639236   | 12.93233    | 7.9544      |
| Tmem181a      | chr17:6270474-6305783     | 12.93053333 | 13.31967    |
| Ppic          | chr18:53565994-53577661   | 12.926799   | 11.83625    |
| Mob1b         | chr5:89149895-89187480    | 12.92589667 | 11.5269     |
| Nqo1          | chr8:109912124-109927105  | 12.92584    | 5.26599     |
| 0610009O20Rik | chr18:38409902-38422283   | 12.92534667 | 19.38953333 |
| Pcdhga8       | chr18:37885359-38001526   | 12.92265667 | 3.597063333 |
| Msh6          | chr17:88374389-88390232   | 12.91793333 | 9.458566667 |
| Supt7l        | chr5:31816941-31829135    | 12.91511333 | 8.305683333 |
| Ctbs          | chr3:146113456-146128735  | 12.91481    | 10.8196     |
| Vcl           | chr14:21748654-21852895   | 12.90968667 | 20.55673333 |
| Mcoln1        | chr8:3500518-3515231      | 12.90507667 | 17.22793333 |
| C230024C17    | chr1:155568369-155584959  | 12.90384667 | 7.532666667 |

|               |                           |             |             |
|---------------|---------------------------|-------------|-------------|
| Lrrc51        | chr7:109061502-109082371  | 12.89912333 | 10.40863667 |
| Lmbrd2        | chr15:9070325-9127206     | 12.89630667 | 21.3975     |
| 4930415O20Rik | chr15:98401434-98420019   | 12.88908    | 0           |
| Slc25a12      | chr2:71112351-71205611    | 12.88323333 | 27.9131     |
| Rnf31         | chr14:56210626-56222508   | 12.88166667 | 8.52609     |
| Sympk         | chr7:19609725-19639971    | 12.88051667 | 15.08806667 |
| Man2b1        | chr8:87607167-87622638    | 12.87936667 | 24.12006667 |
| Ddx27         | chr2:166840812-166860445  | 12.87794333 | 10.27440667 |
| Rpa1          | chr11:75113760-75161885   | 12.87318    | 8.013136667 |
| Fam108c       | chr7:91257865-91300403    | 12.86373333 | 11.77561667 |
| Dap3          | chr3:88724724-88754204    | 12.86175    | 11.45910333 |
| lkbkb         | chr8:23769676-23817055    | 12.85523333 | 10.89203333 |
| 2900076A07Rik | chr7:88668435-88676384    | 12.85456667 | 2.804736    |
| Epb4.1l2      | chr10:25079603-25243324   | 12.84776667 | 11.23949333 |
| Ncald         | chr15:37295929-37722183   | 12.8453     | 9.026043333 |
| Srp54a        | chr12:56181482-56216354   | 12.83351    | 11.52956667 |
| Mrpl41        | chr2:24827989-24830618    | 12.83211    | 5.630752667 |
| Tagap1        | chr17:7159313-7165505     | 12.8283     | 7.599993333 |
| Enpp4         | chr17:44233258-44242757   | 12.8176     | 11.57244667 |
| Tex2          | chr11:106363452-106474244 | 12.81759    | 26.1076     |
| Npcd          | chr15:79616780-79664763   | 12.8161     | 6.178063333 |
| Acd           | chr8:108222058-108224995  | 12.81435    | 6.9511      |
| Atp1b2        | chr11:69413251-69419462   | 12.81028    | 18.54856667 |
| Manbal        | chr2:157193329-157222499  | 12.80860333 | 6.334913333 |
| Sugp1         | chr8:72566711-72595852    | 12.80498333 | 10.99117    |
| Sumf1         | chr6:108057014-108135577  | 12.79899667 | 17.71222667 |
| Ext1          | chr15:52899817-53177738   | 12.79879333 | 8.615056667 |
| Gnl3          | chr14:31825618-31832275   | 12.7931     | 36.0174     |
| Ntm           | chr9:28803548-29770714    | 12.79289667 | 25.16122333 |
| Zfp691        | chr4:118842122-118846800  | 12.79208333 | 9.444533333 |
| Slc23a2       | chr2:131878231-131970844  | 12.79105667 | 21.4613     |
| Dpp3          | chr19:4907228-4928287     | 12.79002333 | 15.8089     |
| Rab43         | chr6:87738846-87761773    | 12.78716667 | 16.59383667 |
| Scamp3        | chr3:88981406-88986692    | 12.78516667 | 17.44952333 |
| Prdm4         | chr10:85354712-85379690   | 12.78376667 | 21.54943333 |
| Rn4.5s        | chr6:47617916-47618090    | 12.77995333 | 26.6875     |
| Arfgap3       | chr15:83130169-83180677   | 12.77420667 | 15.137      |
| Casc4         | chr2:121692705-121761943  | 12.77215    | 16.09989333 |
| Rrn3          | chr16:13780791-13814934   | 12.77199    | 7.64857     |
| B630005N14Rik | chr6:13575674-13627966    | 12.76885    | 15.50950333 |
| Lig3          | chr11:82594636-82617776   | 12.76214667 | 16.4084     |
| Bhlhb9        | chrX:132420389-132425620  | 12.75874333 | 26.2499     |
| Zfp799        | chr17:32954148-32967193   | 12.7557     | 10.30561333 |
| Tm7sf2        | chr19:6062820-6067850     | 12.75060333 | 32.38243333 |
| Lemd2         | chr17:27326544-27341383   | 12.74762667 | 18.28213333 |
| 3110002H16Rik | chr18:12327238-12348478   | 12.74419333 | 16.1736     |
| Acat2         | chr17:13135907-13153591   | 12.74166667 | 15.39178667 |
| Pik3ca        | chr3:32335072-32367408    | 12.74103333 | 16.3981     |
| Snhg4         | chr18:35713063-35717970   | 12.73995667 | 6.979243333 |
| Cstf2t        | chr19:31157330-31161082   | 12.73919    | 6.748613333 |
| Ssfa2         | chr2:79475581-79513121    | 12.7355     | 26.2978     |
| Lancl2        | chr6:57652448-57689443    | 12.73234667 | 19.25583333 |

|               |       |                           |             |             |
|---------------|-------|---------------------------|-------------|-------------|
|               | 6-Mar | chr2:60047992-60086442    | 12.73216667 | 28.54996667 |
| Polr2i        |       | chr7:31017092-31018406    | 12.73207333 | 5.604793333 |
| Cenpv         |       | chr11:62338445-62352763   | 12.73090667 | 7.401763333 |
| Aimp2         |       | chr5:144663572-144670708  | 12.72387667 | 22.04514667 |
| Gabbr1        |       | chr17:37182910-37211250   | 12.72028333 | 13.32493333 |
| Gart          |       | chr16:91621641-91647217   | 12.7192     | 18.438      |
| 2610528A11Rik |       | chr14:37915325-37923287   | 12.71815    | 107.6557667 |
| Rsrc1         |       | chr3:66789593-67162325    | 12.71811333 | 10.74573333 |
| Fubp3         |       | chr2:31428244-31473039    | 12.71637333 | 16.26816667 |
| Gne           |       | chr4:44046946-44097049    | 12.71008667 | 21.03163333 |
| Tmem188       |       | chr8:90642657-90659096    | 12.70488333 | 17.04406667 |
| C230052I12Rik |       | chr7:36177170-36181786    | 12.70167667 | 18.3228     |
| Zfp821        |       | chr8:112229448-112248832  | 12.69883333 | 21.06989667 |
| Clcn1         |       | chr6:42236683-42264655    | 12.69681667 | 26.2572     |
| Plek2         |       | chr12:79989683-80007925   | 12.69458667 | 22.30346667 |
| Gm15915       |       | chr10:93136962-93146067   | 12.69330667 | 2.086169333 |
| Znrd1as       |       | chr17:37095536-37102568   | 12.69314667 | 9.524076667 |
| Snap29        |       | chr16:17406092-17430919   | 12.68802667 | 18.40276667 |
| Mars2         |       | chr1:55294020-55296902    | 12.68650667 | 5.5401      |
| Eml5          |       | chr12:100024813-100139694 | 12.68636667 | 9.914423333 |
| 5430405H02Rik |       | chr2:156678138-156688681  | 12.68509    | 7.544729667 |
| B930041F14Rik |       | chr4:155068450-155070592  | 12.68160667 | 4.945733333 |
| Trpa1         |       | chr1:14862728-14908943    | 12.68056667 | 0.008299067 |
| Gad2          |       | chr2:22477846-22549397    | 12.67682    | 15.55799667 |
| Fas           |       | chr19:34365148-34402260   | 12.66930667 | 6.43971     |
| Mettl16       |       | chr11:74584364-74632194   | 12.66389333 | 12.23221    |
| Rtn2          |       | chr7:19868015-19881509    | 12.65033333 | 15.26454333 |
| lpo9          |       | chr1:137278891-137327068  | 12.64919667 | 7.882656667 |
| 2210411K11Rik |       | chr7:4736386-4741162      | 12.63883333 | 11.82398    |
| Gramd3        |       | chr18:56591785-56663446   | 12.63841333 | 36.3308     |
| Aldh5a1       |       | chr13:24999447-25029530   | 12.63807333 | 19.38062    |
| Mccc2         |       | chr13:100718486-100785594 | 12.63788333 | 7.93561     |
| Cnot7         |       | chr8:41578389-41596658    | 12.63478    | 31.06723333 |
| Tmem29        |       | chrX:146832315-146893693  | 12.63472333 | 22.6916     |
| Usp10         |       | chr8:122434751-122481457  | 12.63006667 | 14.64013333 |
| Marveld3      |       | chr8:112471808-112486105  | 12.62971333 | 21.5442     |
| Abhd13        |       | chr8:9977716-9992154      | 12.62946333 | 13.50303333 |
| Lrrcc1        |       | chr3:14533787-14572658    | 12.62923333 | 7.94349     |
| 4933424B01Rik |       | chr6:146498153-146526357  | 12.62682667 | 16.83943333 |
| BC068157      |       | chr8:4209542-4217312      | 12.62657667 | 27.7421     |
| Syt1          |       | chr10:107934705-108448031 | 12.626      | 6.44037     |
| Tmem175       |       | chr5:109058828-109076789  | 12.62510667 | 17.15736667 |
| Uchl3         |       | chr14:102053183-102095342 | 12.62055667 | 12.82446    |
| Usf1          |       | chr1:173341811-173348873  | 12.61931333 | 4.763457333 |
| 3425401B19Rik |       | chr14:33472304-33498458   | 12.61534667 | 0.0079749   |
| Pde8a         |       | chr7:88358689-88478508    | 12.60886333 | 2.751127    |
| Pold2         |       | chr11:5772182-5778259     | 12.60838    | 11.12497333 |
| Lrrc10b       |       | chr19:10529860-10531937   | 12.60800667 | 1.4818696   |
| Fam83f        |       | chr15:80502276-80530855   | 12.60732333 | 20.21053333 |
| Arvcf         |       | chr16:18348366-18407167   | 12.6034     | 11.36759333 |
| Zfp26         |       | chr9:20232761-20264604    | 12.59477667 | 11.92226667 |
| Raly          |       | chr2:154616845-154692997  | 12.5827     | 20.94706333 |

|               |                           |             |             |
|---------------|---------------------------|-------------|-------------|
| 6330503K22Rik | chr7:125856124-125880532  | 12.5782     | 12.76632333 |
| Ankib1        | chr5:3689999-3803109      | 12.57569667 | 14.324      |
| Gm3776        | chr9:78104935-78116973    | 12.57273333 | 18.29304333 |
| Ergic1        | chr17:26698456-26793878   | 12.5718     | 16.19110667 |
| Cndp2         | chr18:84836860-84855025   | 12.57114333 | 4.838096667 |
| Foxo1         | chr3:52072258-52154031    | 12.57093333 | 9.05679     |
| Pi4kb         | chr3:94778652-94810765    | 12.56979667 | 11.89877667 |
| Chchd4        | chr6:91414269-91423417    | 12.56589667 | 12.03932667 |
| Cox19         | chr5:139813775-139821120  | 12.56358    | 27.4072     |
| Mfsd5         | chr15:102109886-102112175 | 12.56286667 | 28.91366667 |
| 2410018M08Rik | chr5:130371592-130379492  | 12.56026667 | 12.87672    |
| Hadh          | chr3:130936341-130974955  | 12.55731333 | 19.89596667 |
| 1700021F05Rik | chr10:43244926-43260800   | 12.55727333 | 11.74328667 |
| Arl2bp        | chr8:97190654-97198322    | 12.55631    | 20.69792333 |
| Tmem39b       | chr4:129353598-129374082  | 12.55427333 | 15.02556667 |
| Orc4          | chr2:48758273-48804787    | 12.55177333 | 9.2024      |
| Scarb1        | chr5:125757456-125821464  | 12.55083667 | 3.578726667 |
| Gsta1         | chr9:78078475-78090490    | 12.54369    | 18.33876333 |
| Zfp408        | chr2:91483844-91489948    | 12.53796667 | 16.99727667 |
| Slit2         | chr5:48374393-48697017    | 12.53731    | 0.448855267 |
| Scyl1         | chr19:5758426-5771401     | 12.53586667 | 12.00467    |
| BC005764      | chr10:79323219-79337379   | 12.5352     | 22.12095333 |
| Cwc25         | chr11:97606783-97627927   | 12.53453    | 6.704706667 |
| Rad52         | chr6:119852715-119872841  | 12.53253333 | 22.49432    |
| Siae          | chr9:37421431-37455903    | 12.53216667 | 11.58472333 |
| Kcnk1         | chr8:128519001-128554585  | 12.53014    | 16.50198667 |
| Wdfy2         | chr14:63456526-63575723   | 12.53010333 | 4.534298    |
| 1810029B16Rik | chr8:69000244-69010406    | 12.52632667 | 12.22570333 |
| Fam82a2       | chr2:118962733-118982770  | 12.52346667 | 21.09578667 |
| Tmprss13      | chr9:45127182-45155663    | 12.52306667 | 12.13300333 |
| Pm20d2        | chr4:33257381-33276712    | 12.51275667 | 7.197533667 |
| Lin54         | chr5:100871057-100929658  | 12.50848333 | 12.38433667 |
| Slc41a1       | chr1:133724588-133745440  | 12.50365333 | 14.29026667 |
| Rn4.5s        | chr6:47694056-47694230    | 12.5027     | 31.42536667 |
| Polm          | chr11:5727862-5738019     | 12.50156    | 2.677847667 |
| Pcyox1        | chr6:86335999-86347144    | 12.49716667 | 19.52626667 |
| Rmrp          | chr4:43505656-43505931    | 12.49533333 | 36.18519    |
| Ufm1          | chr3:53657297-53667729    | 12.49333333 | 7.193716667 |
| Gm7694        | chr1:172228323-172236463  | 12.48782333 | 9.34531     |
| Alg2          | chr4:47482704-47487239    | 12.48446    | 13.88833333 |
| Phkg2         | chr7:134716861-134726821  | 12.48290667 | 11.36189    |
| Tmem192       | chr8:67471083-67492935    | 12.48216667 | 14.74783    |
| AK129341      | chr9:8076632-8134294      | 12.47706667 | 7.499276667 |
| Rn4.5s        | chr6:47630883-47631057    | 12.47491333 | 39.99393333 |
| Slc17a5       | chr9:78384315-78435834    | 12.47114333 | 13.43304333 |
| Atg12         | chr18:46892070-46901233   | 12.46785    | 21.58       |
| Sirt6         | chr10:81084530-81090353   | 12.46777333 | 3.905136667 |
| Cldn9         | chr17:23819550-23820993   | 12.46754333 | 6.398776667 |
| Tmx4          | chr2:134420241-134469857  | 12.4645     | 11.22109    |
| Sema4b        | chr7:87331726-87371410    | 12.46305333 | 20.95356667 |
| Foxk2         | chr11:121121300-121171210 | 12.4615     | 19.05666667 |
| 4933400F21Rik | chr1:91573081-91580467    | 12.46139667 | 8.465343333 |

|               |                           |             |             |
|---------------|---------------------------|-------------|-------------|
| Elmod3        | chr6:72515915-72548407    | 12.4538     | 8.104       |
| Gtpbp5        | chr2:179805297-179820607  | 12.45181    | 3.777496667 |
| Dnalc1        | chr12:85455277-85484460   | 12.4456     | 9.585156667 |
| Spata6        | chr4:111392614-111501745  | 12.44407667 | 7.659453333 |
| Gga1          | chr15:78707619-78725015   | 12.44205    | 5.094715333 |
| Brix1         | chr15:10404533-10415692   | 12.44181333 | 13.84779    |
| Kcnb1         | chr2:166921468-167014318  | 12.43866667 | 16.31906667 |
| Pcdhga7       | chr18:37874487-38001526   | 12.42411333 | 5.954513333 |
| Zfyve27       | chr19:42245056-42269082   | 12.42285    | 6.387986667 |
| Lrrc48        | chr11:60166881-60207835   | 12.42134    | 5.228536667 |
| Acvr1         | chr2:58298848-58419239    | 12.41430333 | 20.6852     |
| Gtf3c5        | chr2:28421782-28438799    | 12.40290667 | 18.3588     |
| Kctd11        | chr11:69691765-69694487   | 12.4025     | 22.7561     |
| Mpped2        | chr2:106533615-106708517  | 12.39684    | 8.272063333 |
| Rps12         | chr10:23504988-23507015   | 12.39112667 | 13.18512333 |
| Adora2b       | chr11:62062485-62079954   | 12.3876     | 10.75505    |
| Sec61a2       | chr2:5792032-5816399      | 12.3853     | 16.89163333 |
| Klhl18        | chr9:110328429-110379198  | 12.3829     | 11.0028     |
| Eral1         | chr11:77886877-77893885   | 12.3767     | 5.578013333 |
| Nbeal1        | chr1:60237442-60391549    | 12.3763     | 8.116713333 |
| Tatdn1        | chr15:58721707-58765285   | 12.36536667 | 21.52524333 |
| Arl5a         | chr2:52253470-52280394    | 12.36303333 | 12.3102     |
| Epb4.1l4a     | chr18:33955980-34166860   | 12.36216667 | 19.15463333 |
| 1110012J17Rik | chr17:66686321-66799090   | 12.36084667 | 18.15383333 |
| 3110001D03Rik | chr4:74923257-74924190    | 12.35490333 | 20.87899667 |
| Fgd4          | chr16:16422070-16560289   | 12.35083333 | 12.15547667 |
| Rin2          | chr2:145611851-145713352  | 12.34963333 | 29.82626667 |
| Tbc1d7        | chr13:43247108-43266870   | 12.34751667 | 13.65771    |
| Ndufaf4       | chr4:24825229-24832148    | 12.34631    | 6.9445      |
| Ntn1          | chr11:68022865-68200328   | 12.34223333 | 1.32335     |
| Vbp1          | chrX:72759635-72780285    | 12.34043333 | 17.8733     |
| Evi5          | chr5:108173813-108304126  | 12.3375     | 21.85773333 |
| Cab39l        | chr14:60059817-60167740   | 12.32538333 | 31.39083333 |
| Mcf2          | chr17:87653782-87665287   | 12.32463333 | 6.200743333 |
| 1600014C10Rik | chr7:38968235-38982584    | 12.31114333 | 6.54979     |
| Zfp750        | chr11:121372289-121380656 | 12.30312333 | 46.98303333 |
| Parp9         | chr16:35938555-35972707   | 12.30113333 | 6.214355333 |
| Timm17b       | chrX:7476523-7484778      | 12.30112    | 10.34829    |
| Mtap9         | chr3:82161993-82199190    | 12.29036667 | 15.9433     |
| Ttc32         | chr12:9036802-9043200     | 12.28752333 | 10.47256667 |
| Fermt2        | chr14:46078466-46149740   | 12.28601    | 13.6194     |
| Hist2h3c2     | chr3:96042030-96043050    | 12.27804333 | 8.44454     |
| Mon1b         | chr8:116159485-116169079  | 12.2725     | 16.1533     |
| Rnf168        | chr16:32277546-32301525   | 12.26874333 | 12.13584667 |
| Sc4mol        | chr8:67196941-67212375    | 12.26553333 | 22.03293333 |
| Tsen34        | chr7:3645211-3652637      | 12.26477667 | 10.30269667 |
| 1700029I15Rik | chr2:92223074-92223760    | 12.26217667 | 12.5883     |
| Pitpnm2       | chr5:124568698-124666427  | 12.26097333 | 29.61516667 |
| Zfp407        | chr18:84377093-84758896   | 12.25726667 | 10.54179333 |
| Sart1         | chr19:5377522-5388703     | 12.25134667 | 6.652906667 |
| Fam101a       | chr5:125483844-125492917  | 12.25093333 | 15.76447    |
| Cc2d1b        | chr4:108292560-108306727  | 12.24771333 | 7.89498     |

|               |                           |             |             |
|---------------|---------------------------|-------------|-------------|
| Xpr1          | chr1:157122786-157264574  | 12.24006667 | 23.47653333 |
| Klk10         | chr7:51036423-51040780    | 12.23986    | 28.24136667 |
| Lrrc42        | chr4:106906118-106926138  | 12.23921333 | 14.34955333 |
| Krt23         | chr11:99339286-99354424   | 12.23898667 | 38.48396667 |
| Pik3c2a       | chr7:123480789-123586972  | 12.23764    | 14.60442333 |
| Scaf1         | chr7:52258319-52271619    | 12.23703333 | 15.72468333 |
| Nsg2          | chr11:31900458-31959202   | 12.23631667 | 29.62283333 |
| BC003331      | chr1:152208440-152240185  | 12.23313    | 16.44926667 |
| Map3k3        | chr11:105946215-106016748 | 12.22903667 | 9.896163333 |
| Plekhh1       | chr12:80130149-80182642   | 12.22412    | 13.9418     |
| Fbxo42        | chr4:140703836-140759977  | 12.22374333 | 7.571346667 |
| Ppp1r13b      | chr12:113066668-113146266 | 12.22207333 | 11.30714333 |
| Crb3          | chr17:57201699-57205337   | 12.22125    | 9.799603333 |
| Paxip1        | chr5:28067204-28117879    | 12.21663333 | 21.1389     |
| Nprl2         | chr9:107444539-107448037  | 12.21599667 | 6.08596     |
| Il18bp        | chr7:109163590-109166669  | 12.21222667 | 15.15513    |
| 2900056M2ORik | chrX:148729370-148762036  | 12.20923333 | 10.29230667 |
| Cgrrf1        | chr14:47451918-47473865   | 12.20721667 | 7.567683333 |
| Gtf2f2        | chr14:76296743-76410672   | 12.20643333 | 18.56190333 |
| Zrsr2         | chrX:160373374-160396598  | 12.19924667 | 6.813093333 |
| Pdlim7        | chr13:55598847-55614800   | 12.19680667 | 18.10486667 |
| Lrrc36        | chr8:107937521-107987986  | 12.19641667 | 7.566986667 |
| Mrps18b       | chr17:36047329-36053314   | 12.18465667 | 7.183773333 |
| Gnai1         | chr5:17770952-17866231    | 12.18397    | 39.10706667 |
| Arhgap26      | chr18:39152798-39535939   | 12.18103667 | 7.083966667 |
| Usp38         | chr8:83504631-83538805    | 12.18076667 | 13.45953333 |
| Ly6a          | chr15:74825306-74828318   | 12.17195    | 53.85206667 |
| Stk11ip       | chr1:75518103-75533910    | 12.16458667 | 5.576126667 |
| Paip2b        | chr6:83756052-83781735    | 12.15833333 | 15.14434    |
| Lrrc20        | chr10:60938580-61044976   | 12.15111667 | 9.7607      |
| Aktip         | chr8:93647397-93659395    | 12.14982667 | 17.8832     |
| Hey1          | chr3:8663358-8667038      | 12.14612667 | 17.57526667 |
| Crabp2        | chr3:87752614-87757294    | 12.14295    | 2.421279333 |
| Atxn1         | chr13:45645124-46060360   | 12.14196667 | 15.63683333 |
| Abcc1         | chr16:14361650-14474971   | 12.13889333 | 25.7971     |
| Smox          | chr2:131317597-131350919  | 12.13516333 | 9.460043333 |
| Rbm10         | chrX:20194628-20228031    | 12.13394333 | 10.43281    |
| Cox7a1        | chr7:30969189-30971049    | 12.12847667 | 8.807113333 |
| Best3         | chr10:116423369-116462096 | 12.12762667 | 0.086686633 |
| Tmem39a       | chr16:38558810-38592275   | 12.12604333 | 20.61626667 |
| Usp32         | chr11:84797989-84953457   | 12.12401667 | 15.19207333 |
| Ikzf4         | chr10:128069470-128083049 | 12.11690333 | 4.514963333 |
| Golt1b        | chr6:142335762-142352378  | 12.11391667 | 10.61277333 |
| Ythdf2        | chr4:131740830-131768171  | 12.11374    | 10.46894667 |
| Dopey1        | chr9:86360760-86449413    | 12.1102     | 12.99435333 |
| Zfp687        | chr3:94810623-94819160    | 12.10797333 | 27.01103333 |
| Cd14          | chr18:36884720-36886308   | 12.10409    | 7.576673333 |
| Gpr137b       | chr13:13449887-13485891   | 12.10376667 | 8.173253333 |
| Gas2          | chr7:59134514-59249828    | 12.09146667 | 0.658533667 |
| Ap3m1         | chr14:21852963-21871664   | 12.09102333 | 12.43303667 |
| lzumo1        | chr7:52877180-52882612    | 12.09024667 | 11.792848   |
| Prosc         | chr8:28153026-28166604    | 12.0882     | 10.52164333 |

|               |                          |             |             |
|---------------|--------------------------|-------------|-------------|
| 1810011O10Rik | chr8:25548087-25549418   | 12.08638667 | 8.488729667 |
| Fkbp15        | chr4:61961375-62021582   | 12.08313333 | 15.57533333 |
| Hscb          | chr5:111258088-111268796 | 12.08167667 | 12.10789667 |
| Abcb8         | chr5:23899973-23915765   | 12.08102    | 13.29866667 |
| Fbxl17        | chr17:63395300-63849929  | 12.07148    | 10.29117    |
| Gsr           | chr8:34763709-34808634   | 12.06992667 | 45.61833333 |
| Pds5b         | chr5:151476401-151613245 | 12.06893333 | 11.1812     |
| Heatr7a       | chr15:76210942-76283469  | 12.0679     | 10.88683333 |
| Ppat          | chr5:77342273-77380603   | 12.05911667 | 13.36396667 |
| Arid3b        | chr9:57638315-57682041   | 12.05436667 | 15.09199667 |
| Oraov1        | chr7:152101098-152107042 | 12.04988667 | 14.0945     |
| Fbxw4         | chr19:45652746-45734683  | 12.04932667 | 5.100888667 |
| Papolg        | chr11:23762645-23795270  | 12.04914333 | 12.37643667 |
| Spata5        | chr3:37319201-37478017   | 12.04327    | 14.35423667 |
| Dab2ip        | chr2:35413977-35586514   | 12.04095667 | 11.50549333 |
| Nedd9         | chr13:41405284-41582689  | 12.03031    | 21.06503333 |
| Mapkbp1       | chr2:119798434-119853139 | 12.02948667 | 13.24862333 |
| Zwint         | chr10:72117642-72132537  | 12.02476667 | 16.30653333 |
| Epha1         | chr6:42308485-42323267   | 12.02385667 | 41.3533     |
| Nup50         | chr15:84753857-84773393  | 12.02243333 | 10.55051333 |
| Rhot1         | chr11:80022556-80081409  | 12.02235    | 12.76286667 |
| Abcc8         | chr7:53359892-53435403   | 12.01406667 | 11.85563    |
| Acp2          | chr2:91043068-91054255   | 12.01376667 | 14.89666333 |
| Kcnb2         | chr1:15302532-15704295   | 12.00787667 | 2.91916     |
| Tbrg4         | chr11:6515600-6526070    | 12.00733333 | 3.630663333 |
| Kank1         | chr19:25311691-25508986  | 12.00715667 | 12.41132333 |
| 1700007G11Rik | chr5:98758322-99231038   | 12.00569333 | 5.45253     |
| 4430402I18Rik | chr19:28997553-29038644  | 12.00248333 | 2.997553333 |
| Dnajc28       | chr16:91614501-91619244  | 12.00233333 | 9.29518     |
| Nolc1         | chr19:46150352-46160020  | 12.00103333 | 12.35668    |
| Trip4         | chr9:65676732-65756601   | 12.00003333 | 9.18796     |
| Rtn4ip1       | chr10:43621612-43667668  | 11.99643667 | 8.94697     |
| Reep2         | chr18:35000242-35007117  | 11.99294333 | 12.19297333 |
| Spsb2         | chr6:124758958-124760632 | 11.97934333 | 5.344188667 |
| 1500002O20Rik | chr7:25184646-25207796   | 11.97326667 | 4.884386667 |
| Lst1          | chr17:35322039-35325385  | 11.96288    | 0           |
| Tbc1d1        | chr5:64551449-64742725   | 11.96114    | 4.9747      |
| Tbcel         | chr9:42220399-42280309   | 11.95939    | 12.79854667 |
| Blzf1         | chr1:166219930-166237615 | 11.94563667 | 7.389303333 |
| B4galt3       | chr1:173200458-173207026 | 11.9437     | 17.96133333 |
| Ttc7          | chr17:87682225-87781110  | 11.93710333 | 3.84533     |
| 1300010F03Rik | chr14:79248984-79602117  | 11.93419667 | 13.10839    |
| E130308A19Rik | chr4:59639092-59767175   | 11.9321     | 9.161996667 |
| Nfkb1         | chr3:135247618-135354511 | 11.93139    | 5.14091     |
| Cdca7         | chr2:72314275-72324947   | 11.92956667 | 3.2297      |
| Mecr          | chr4:131399385-131423702 | 11.92850333 | 3.85802     |
| Gpatch1       | chr7:36061562-36103459   | 11.92670333 | 6.301269667 |
| Nudt21        | chr8:96543302-96560939   | 11.92265667 | 13.33464667 |
| Uchl5         | chr1:145624407-145654596 | 11.91903333 | 15.37629333 |
| 1110037F02Rik | chr4:11413104-11478290   | 11.91637333 | 6.773183333 |
| Pigk          | chr3:152377063-152451977 | 11.91104333 | 9.867686667 |
| Polr3a        | chr14:25267915-25306268  | 11.90780667 | 10.77762333 |

|               |                           |             |             |
|---------------|---------------------------|-------------|-------------|
| Zfp704        | chr3:9427009-9610085      | 11.90766667 | 12.05059    |
| Krt20         | chr11:99289716-99299467   | 11.90722333 | 4.535226667 |
| Rit1          | chr3:88520775-88534970    | 11.90600667 | 4.219626667 |
| Haghl         | chr17:25919769-25922278   | 11.90158    | 11.81524667 |
| Nfatc2        | chr2:168301909-168427155  | 11.90044    | 10.01546333 |
| 9530082P21Rik | chr17:23886202-23891032   | 11.89902    | 3.648316667 |
| Mut           | chr17:41071633-41098938   | 11.89609667 | 13.26006    |
| Zfp410        | chr12:85657808-85685389   | 11.89443333 | 23.4875     |
| Ccdc75        | chr17:79234855-79247648   | 11.88898    | 7.76042     |
| Usp30         | chr5:114550341-114572933  | 11.88453333 | 8.582923333 |
| Prune         | chr3:95057595-95085998    | 11.88425333 | 21.62823333 |
| Lta4h         | chr10:92916140-92947641   | 11.88250333 | 13.39605667 |
| Cblb          | chr16:52031661-52208159   | 11.88229    | 20.78176667 |
| Trmt2a        | chr16:18248975-18254865   | 11.87736    | 9.671396667 |
| Pex14         | chr4:148334643-148473921  | 11.87073667 | 2.340696667 |
| Alkbh8        | chr9:3335230-3385846      | 11.86885    | 15.27701667 |
| Tsc22d2       | chr3:58219610-58270709    | 11.86756    | 14.04976667 |
| Mtmr9         | chr14:64142446-64162790   | 11.86515667 | 5.8541      |
| Prkra         | chr2:76467993-76486051    | 11.86343    | 8.537653333 |
| Zc3h7b        | chr15:81575277-81626699   | 11.86224    | 10.56594333 |
| Myst1         | chr7:135056030-135069276  | 11.85746333 | 5.801906667 |
| Hmox1         | chr8:77617516-77624492    | 11.85682333 | 11.63905333 |
| Rad9b         | chr5:122775516-122804204  | 11.85334667 | 9.344666667 |
| Cnm3          | chr1:36568720-36585082    | 11.85211    | 9.920376667 |
| Tbcd          | chr11:121313262-121478484 | 11.85028    | 14.84783667 |
| 3200002M19Rik | chr7:109044928-109048057  | 11.84784667 | 12.11577333 |
| C1qbp         | chr11:70791347-70796528   | 11.84763667 | 25.85015667 |
| Tox4          | chr14:52898820-52915184   | 11.83956667 | 21.86244333 |
| Gmcl1         | chr6:86641761-86683372    | 11.83506667 | 12.66       |
| Rusc2         | chr4:43394853-43439958    | 11.83474    | 6.643413333 |
| Csrp2bp       | chr2:144194767-144233411  | 11.8324     | 11.78855667 |
| Zfp941        | chr7:147995575-148008077  | 11.82806667 | 5.474853333 |
| Pibf1         | chr14:99498651-99653712   | 11.81523333 | 7.84605     |
| Mettl3        | chr14:52914516-52924799   | 11.81317    | 6.370133333 |
| Fblim1        | chr4:141131976-141161967  | 11.80848667 | 8.853426667 |
| Pin4          | chrX:99314803-99323012    | 11.80777    | 10.72673    |
| Plekhn2       | chr4:141181648-141220030  | 11.80579    | 6.266686667 |
| Tcp11l1       | chr2:104520136-104552319  | 11.80197    | 23.6158     |
| Sorcs2        | chr5:36359829-36740788    | 11.80024667 | 87.3312     |
| Krtap16-3     | chr16:88962548-88963118   | 11.79741333 | 0           |
| Zfp612        | chr8:112603633-112616652  | 11.79724667 | 9.81397     |
| Cdkl5         | chrX:157222239-157432613  | 11.79721667 | 21.21103333 |
| Papd7         | chr13:69636836-69672742   | 11.79517333 | 8.9915      |
| Tcn2          | chr11:3817080-3832081     | 11.79482333 | 18.99183333 |
| Nkd1          | chr8:91045242-91118786    | 11.78743667 | 43.61426667 |
| 4930453N24Rik | chr16:64765930-64770765   | 11.78431667 | 6.27003     |
| Traf3         | chr12:112404758-112505359 | 11.78290333 | 15.80484333 |
| Efnb1         | chrX:96331468-96344330    | 11.78218333 | 5.937823333 |
| Wrnip1        | chr13:32893898-32914479   | 11.78187667 | 13.98125667 |
| lft122        | chr6:115803545-115876717  | 11.77966667 | 13.78693333 |
| Zfp868        | chr8:72134552-72149447    | 11.77603333 | 16.16216667 |
| 4930565N06Rik | chr16:36880604-36897275   | 11.7752     | 11.48373667 |



|               |                           |             |             |
|---------------|---------------------------|-------------|-------------|
| Fbxo7         | chr10:85484673-85511073   | 11.77436667 | 7.097453333 |
| Dgkk          | chrX:6356431-6525489      | 11.76777    | 4.426455    |
| Rapgef5       | chr12:118754951-118995451 | 11.76773    | 2.958456667 |
| Cdc34         | chr10:79144939-79151143   | 11.76468    | 8.76996     |
| Klf10         | chr15:38224167-38230462   | 11.76296667 | 34.93893333 |
| BC020402      | chr10:7398768-7400956     | 11.7625     | 1.358253333 |
| Gcdh          | chr8:87410285-87417820    | 11.75834333 | 12.62956667 |
| Parp4         | chr14:57194455-57278635   | 11.75595333 | 12.14735667 |
| Eid3          | chr10:82329370-82330674   | 11.75289333 | 19.05116667 |
| Polr3k        | chr2:181599064-181605531  | 11.74674667 | 18.05733333 |
| Ino80         | chr2:119198778-119303365  | 11.74643333 | 14.03380667 |
| Zfp3          | chr11:70577948-70586431   | 11.74617667 | 5.78541     |
| Fgfbp1        | chr5:44370098-44373001    | 11.74580667 | 26.11479    |
| Bcl9l         | chr9:44307218-44318495    | 11.74577333 | 11.81322333 |
| Ces2g         | chr8:107485617-107493437  | 11.74317667 | 32.45116667 |
| Herpud2       | chr9:24912573-24956280    | 11.74116667 | 16.62865667 |
| Cd59a         | chr2:103935957-103955508  | 11.74085    | 34.30426667 |
| Fam49b        | chr15:63760648-63892010   | 11.71536333 | 8.745366667 |
| Ccdc45        | chr11:106650565-106680175 | 11.70703    | 15.61953333 |
| Taf1          | chrX:98728073-98797128    | 11.70556667 | 17.48276667 |
| Cblc          | chr7:20365066-20382158    | 11.70362667 | 5.37465     |
| Mrps23        | chr11:88017919-88025009   | 11.70151333 | 12.68218333 |
| Rif1          | chr2:51928356-51977901    | 11.69895    | 15.77613333 |
| Sil1          | chr18:35426049-35658579   | 11.69883    | 12.28795    |
| Galt          | chr4:41702125-41705998    | 11.69389    | 11.46837333 |
| Kif1c         | chr11:70514049-70545472   | 11.69143333 | 21.49913333 |
| Wiz           | chr17:32490994-32526384   | 11.69099667 | 17.56791667 |
| Tspan17       | chr13:54890765-54898136   | 11.68876333 | 8.92989     |
| Alkbh3        | chr2:93820790-93850887    | 11.68627667 | 17.62218333 |
| Josd1         | chr15:79504679-79518302   | 11.68503333 | 16.6075     |
| Fam53a        | chr5:33943001-33972284    | 11.68283333 | 8.826243333 |
| 5830418K08Rik | chr9:15121357-15162232    | 11.68263333 | 7.971853333 |
| Bag5          | chr12:112947703-112951467 | 11.67762    | 20.35396667 |
| Gm1631        | chr2:71557473-71569023    | 11.67716    | 0.130392667 |
| Ubxn7         | chr16:32332337-32393833   | 11.6771     | 23.24294667 |
| Phtf2         | chr5:20264481-20387942    | 11.67708    | 8.999113333 |
| Ap4m1         | chr5:138613248-138619913  | 11.67311    | 6.843796667 |
| Rpap2         | chr5:108026398-108090857  | 11.67253    | 7.30608     |
| 2700069I18Rik | chr3:5177827-5220823      | 11.66937333 | 0           |
| Nrf1          | chr6:29997987-30103458    | 11.66922667 | 10.04762667 |
| Slc25a1       | chr16:17925303-17928312   | 11.66594667 | 16.03156667 |
| C330007P06Rik | chrX:34388538-34404241    | 11.66515    | 8.16174     |
| Pmm1          | chr15:81781535-81791297   | 11.66351333 | 13.91386667 |
| Pex16         | chr2:92214832-92221377    | 11.66275    | 5.100632    |
| Myo10         | chr15:25552304-25743426   | 11.65806667 | 12.94976667 |
| Sirt1         | chr10:62781752-62801783   | 11.65786667 | 18.81506667 |
| Adat3         | chr10:80065624-80070399   | 11.65754333 | 3.641246667 |
| Yap1          | chr9:7932000-8004596      | 11.65082667 | 14.1806     |
| Senp2         | chr16:22009556-22049342   | 11.65071667 | 10.73404667 |
| 9430083A17Rik | chr13:51193106-51196096   | 11.64892    | 2.225951333 |
| Usp39         | chr6:72268669-72295169    | 11.64836333 | 8.395253333 |
| Akr1b10       | chr6:34334246-34346949    | 11.64424333 | 14.03517667 |

|               |                           |             |             |
|---------------|---------------------------|-------------|-------------|
| Gm13363       | chr1:30998436-31006555    | 11.63930667 | 14.9373     |
| Mtap7d1       | chr4:125909411-125933563  | 11.63682    | 7.901523333 |
| Paqr9         | chr9:95460235-95462540    | 11.63392    | 6.22161     |
| Tbc1d9b       | chr11:49944861-49986287   | 11.62981333 | 13.18216667 |
| Coq10b        | chr1:55109613-55129546    | 11.62858333 | 10.50832333 |
| Ripk1         | chr13:34094742-34127039   | 11.62591667 | 9.868813333 |
| Dhx30         | chr9:109986822-110020120  | 11.6215     | 7.531843333 |
| Cul4b         | chrX:35884797-35929373    | 11.62009667 | 11.011      |
| Psmg2         | chr18:67801252-67813816   | 11.61959333 | 25.28700667 |
| Wbp7          | chr7:31353873-31373745    | 11.61944667 | 12.26253333 |
| Polr3c        | chr3:96515817-96531362    | 11.61489333 | 7.722483333 |
| BC053749      | chr7:31324152-31337291    | 11.61348    | 4.28698     |
| Dnajc17       | chr2:118998235-119034531  | 11.60816    | 13.64616333 |
| Cdc23         | chr18:34791336-34811390   | 11.60619    | 18.26851333 |
| Hira          | chr16:18876842-18970401   | 11.60234333 | 5.843043333 |
| Mrpl47        | chr3:32626418-32635677    | 11.60092    | 7.10521     |
| BC057022      | chr5:115018259-115063227  | 11.59897667 | 38.9961     |
| Cbx7          | chr15:79746236-79763076   | 11.59636    | 18.31834333 |
| Ptprd         | chr4:75587142-76240203    | 11.59216667 | 4.640380033 |
| 2310047B19Rik | chr9:21760196-21762714    | 11.59025333 | 5.2971      |
| Acp6          | chr3:96962699-96980499    | 11.58636667 | 22.57726667 |
| Lap3          | chr5:45884612-45903930    | 11.57786    | 15.41925333 |
| Slain1        | chr14:104049459-104104016 | 11.57742333 | 11.20449667 |
| Nfkbib        | chr7:29543269-29551543    | 11.57622    | 10.28527333 |
| Zfp467        | chr6:48377690-48395824    | 11.57596333 | 24.99626667 |
| Hn1l          | chr17:25079414-25097568   | 11.57262667 | 21.12243333 |
| Psm3          | chr12:72075609-72095910   | 11.57241333 | 13.4782     |
| Riok1         | chr13:38128857-38153302   | 11.56795667 | 10.00506333 |
| Rad54l2       | chr9:106590410-106691544  | 11.56647333 | 8.339076667 |
| Pip4k2a       | chr2:18763882-18919748    | 11.56428    | 23.31453333 |
| 8430410K20Rik | chr9:4383536-4386869      | 11.56384333 | 13.84142667 |
| Pde10a        | chr17:8994609-9179513     | 11.56261    | 6.268823333 |
| Gm10565       | chr4:141640212-141644016  | 11.56123333 | 0.873443333 |
| Arhgef10      | chr8:14911716-15001085    | 11.54611667 | 1.853297333 |
| Ints8         | chr4:11126304-11181406    | 11.54417    | 25.86573333 |
| Gosr1         | chr11:76540103-76577057   | 11.54244    | 10.80227333 |
| Dctn1         | chr6:83115917-83150112    | 11.54079667 | 13.08716667 |
| Zfyve19       | chr2:119034455-119042786  | 11.53321667 | 6.161066667 |
| Trpv4         | chr5:115072162-115108430  | 11.53234667 | 7.42039     |
| N4bp3         | chr11:51456590-51464575   | 11.52635667 | 22.65217667 |
| Ampd3         | chr7:117916117-117955909  | 11.52133    | 5.303653333 |
| Klhl12        | chr1:136352131-136387450  | 11.51820333 | 11.33426    |
| Prss23        | chr7:96656294-96666096    | 11.51590333 | 4.878428833 |
| Txndc15       | chr13:55816010-55827588   | 11.51549667 | 13.85256667 |
| Mosc2         | chr1:186636946-186669726  | 11.51138667 | 14.95584667 |
| Fto           | chr8:93837423-94192332    | 11.5111     | 11.07928    |
| Osbp16        | chr2:76244594-76438704    | 11.51032    | 7.01944     |
| Ppp2r3a       | chr9:101007319-101154162  | 11.50919333 | 12.72842333 |
| Fchs2         | chr7:108257288-108432919  | 11.50467333 | 12.75050667 |
| Pgs1          | chr11:117848170-117885325 | 11.50293    | 20.2544     |
| Rsb1          | chr3:103718042-103770543  | 11.49372333 | 19.7891     |
| Mtf2          | chr5:108494692-108538238  | 11.48565667 | 17.7805     |

|               |                          |             |             |
|---------------|--------------------------|-------------|-------------|
| Lysmd3        | chr13:81796804-81810889  | 11.47471667 | 14.14326    |
| Hlcs          | chr16:94350911-94509463  | 11.47076333 | 4.78118     |
| Rgl1          | chr1:154364659-154472241 | 11.46759    | 2.399226    |
| Ptpn4         | chr1:121554669-121733648 | 11.46563667 | 11.56008667 |
| Rab3gap2      | chr1:187028046-187110625 | 11.46440667 | 10.56348333 |
| Copg2         | chr6:30698410-30846760   | 11.46175667 | 18.79634667 |
| Mx2           | chr16:97757687-97782508  | 11.45476333 | 3.420838333 |
| Eri3          | chr4:117223098-117346886 | 11.45435667 | 14.9152     |
| Ggcx          | chr6:72364326-72380701   | 11.4539     | 8.154673333 |
| Nsmaf         | chr4:6323353-6381418     | 11.45286667 | 11.93453    |
| Phf23         | chr11:69809272-69813513  | 11.45250667 | 13.74226667 |
| A130022J15Rik | chr6:97060937-97098877   | 11.45038    | 14.01887333 |
| Lmnb2         | chr10:80364107-80380990  | 11.44940667 | 19.45366667 |
| Fgfr1op       | chr17:8358382-8389335    | 11.44866    | 13.67762333 |
| Tfb2m         | chr1:181458186-181476398 | 11.44737333 | 16.62803333 |
| Ift80         | chr3:68696420-68808492   | 11.4399     | 16.02870333 |
| Trap1         | chr16:4039976-4077810    | 11.43779667 | 18.1934     |
| Slc43a2       | chr11:75345195-75391074  | 11.42263    | 5.653923333 |
| Mtus1         | chr8:42076265-42219080   | 11.42212667 | 10.40009333 |
| Tspan15       | chr10:61648143-61693966  | 11.41559667 | 6.217288    |
| Angel1        | chr12:88041451-88067410  | 11.41242333 | 8.750183333 |
| Zfp788        | chr7:48888900-48906902   | 11.41016    | 8.424663333 |
| 4930578N16Rik | chr2:69596113-69627543   | 11.40985333 | 14.5746     |
| Tcf3          | chr10:79871909-79896398  | 11.40886    | 15.89983333 |
| Mxd4          | chr5:34519228-34530359   | 11.39980667 | 17.98684    |
| Rap1gap       | chr4:137220640-137285776 | 11.39498333 | 50.98873333 |
| Sidt2         | chr9:45745957-45763332   | 11.39423333 | 20.41063333 |
| Mboat1        | chr13:30228358-30338563  | 11.38966667 | 9.226716667 |
| A330023F24Rik | chr1:196843592-196864102 | 11.38349    | 4.43514     |
| Cyp39a1       | chr17:43804373-43888380  | 11.38127    | 8.009353333 |
| Tmem231       | chr8:114435917-114457691 | 11.38059333 | 4.676843667 |
| lkzf5         | chr7:138532162-138553992 | 11.37998    | 19.9261     |
| Sox2          | chr3:34548926-34551382   | 11.37961333 | 20.6902     |
| Nbn           | chr4:15885113-15919736   | 11.37466333 | 9.93376     |
| Fxr2          | chr11:69446472-69466799  | 11.37434    | 9.511493333 |
| Rfxap         | chr3:54607036-54611713   | 11.37411333 | 5.704523333 |
| Flcn          | chr11:59605252-59623275  | 11.36873333 | 12.54461333 |
| Fam118b       | chr9:35024549-35075365   | 11.36141333 | 35.0967     |
| Vps45         | chr3:95803754-95862378   | 11.36057667 | 9.949713333 |
| Rabgta        | chr14:56334713-56341013  | 11.36016333 | 11.87185333 |
| Efcab4b       | chr6:127527992-127579956 | 11.358634   | 2.873767333 |
| Cadm4         | chr7:25267041-25289552   | 11.34726    | 18.23963333 |
| Rnf43         | chr11:87476588-87549041  | 11.34548333 | 14.56628333 |
| Lmbr1         | chr5:29556341-29704930   | 11.34326333 | 9.458083333 |
| Hectd3        | chr4:116667952-116677882 | 11.34212333 | 12.19174667 |
| Mettl4        | chr17:95126419-95149232  | 11.33864667 | 15.03981    |
| AI597479      | chr1:43155554-43172791   | 11.33736667 | 9.877916667 |
| Itgb6         | chr2:60436348-60560660   | 11.33368667 | 74.10773333 |
| Dcun1d5       | chr9:7184565-7207031     | 11.33257333 | 23.7237     |
| BC029722      | chr2:155643467-155644939 | 11.32915667 | 6.241836667 |
| Nol10         | chr12:17355298-17436901  | 11.32189    | 6.58695     |
| Megf8         | chr7:26102182-26150936   | 11.31999333 | 6.300033333 |

|               |                           |             |             |
|---------------|---------------------------|-------------|-------------|
| Spryd3        | chr15:101946958-101966646 | 11.31953667 | 4.395136667 |
| Ces2f         | chr8:107471255-107479862  | 11.31666667 | 24.009521   |
| Rap1gds1      | chr3:138588869-138738163  | 11.31356667 | 14.21723333 |
| Fbxo21        | chr5:118426778-118460200  | 11.30953333 | 17.0562     |
| Wdr75         | chr1:45852345-45880458    | 11.30934    | 10.18677333 |
| Usp14         | chr18:9993612-10030147    | 11.30636667 | 13.76084333 |
| Trmt5         | chr12:74381396-74387698   | 11.30422667 | 11.63281667 |
| Wdr73         | chr7:88035608-88046155    | 11.30264333 | 21.76753667 |
| Fbxo28        | chr1:184243232-184271737  | 11.29936667 | 12.67188    |
| Arsg          | chr11:109334687-109434643 | 11.29608    | 2.73283     |
| Rnf219        | chr14:104876750-104921883 | 11.29430667 | 8.297416667 |
| Krtap13       | chr16:88750989-88751873   | 11.29017833 | 17.89106667 |
| Sgsm3         | chr15:80808194-80842720   | 11.29004333 | 15.58705333 |
| Ing2          | chr8:48752531-48760513    | 11.28739667 | 9.695753333 |
| Ganc          | chr2:120229631-120286588  | 11.28631333 | 6.554926667 |
| 2310002J15Rik | chr2:25094338-25095417    | 11.28154667 | 12.15708667 |
| Nt5dc1        | chr10:34023417-34138334   | 11.27359667 | 11.70346667 |
| Tmem17        | chr11:22412285-22419234   | 11.26979    | 6.031356667 |
| Slc29a3       | chr10:60174819-60215530   | 11.26933333 | 15.07863333 |
| Mfsd4         | chr1:133923197-133964639  | 11.26907667 | 8.857146667 |
| Lym4          | chr13:36070665-36209226   | 11.26536    | 9.418586667 |
| Dnajc18       | chr18:35830758-35862798   | 11.2641     | 9.758733333 |
| Kif9          | chr9:110379461-110427678  | 11.26289    | 9.39927     |
| Ptgr1         | chr4:58978461-58999950    | 11.26200667 | 25.94166667 |
| Ankrd13b      | chr11:77283988-77303180   | 11.26038667 | 19.1787     |
| Tfcp2l1       | chr1:120524521-120581745  | 11.25943333 | 10.40357667 |
| Nkiras1       | chr14:19103655-19116514   | 11.25576    | 4.85618     |
| Dhx40         | chr11:86582350-86621162   | 11.25537667 | 24.5548     |
| Srp54b        | chr12:56256090-56290200   | 11.25314667 | 11.56853333 |
| Capns2        | chr8:95425293-95426308    | 11.25291667 | 32.45716667 |
| Tmem146       | chr17:56767565-56803879   | 11.25116333 | 3.365453433 |
| Noc3l         | chr19:38862617-38893727   | 11.24877333 | 8.5621      |
| Hist1h4h      | chr13:23622912-23623390   | 11.23938667 | 2.202573333 |
| Gfod1         | chr13:43290887-43399541   | 11.23846    | 3.95291     |
| Gfm2          | chr13:97907891-97951151   | 11.23684667 | 7.126223333 |
| Ptpdc1        | chr13:48673240-48720942   | 11.23406667 | 2.349903333 |
| Abcb7         | chrX:101475903-101609185  | 11.2277     | 10.07527667 |
| Tbl2          | chr5:135625580-135638532  | 11.22655667 | 8.600006667 |
| Ube4a         | chr9:44731209-44773683    | 11.22403333 | 11.70918667 |
| Thoc6         | chr17:23805585-23810737   | 11.22010667 | 7.371506667 |
| Yes1          | chr5:32913543-32989439    | 11.21627667 | 9.582293333 |
| Sprr1b        | chr3:92240730-92242701    | 11.21450333 | 34.52783333 |
| Gin1          | chr1:99666755-99689548    | 11.20733333 | 9.642636667 |
| Nudt7         | chr8:116657478-116676205  | 11.20347333 | 11.95188667 |
| Nln           | chr13:104813518-104899694 | 11.19927333 | 16.06093333 |
| 4930564B18Rik | chr14:76042065-76066944   | 11.19908667 | 0           |
| Chdh          | chr14:30822185-30853652   | 11.19601333 | 9.686266667 |
| Dusp3         | chr11:101832457-101846105 | 11.19386333 | 3.854843333 |
| Zcchc17       | chr4:129993328-130037190  | 11.19139333 | 10.59722    |
| Timp2         | chr11:118162374-118216725 | 11.18965    | 41.4399     |
| Slc5a3        | chr16:92058566-92087718   | 11.18680667 | 6.196103    |
| Mrp144        | chr1:79772592-79778020    | 11.17716667 | 11.17131    |

|               |                           |             |             |
|---------------|---------------------------|-------------|-------------|
| Smagp         | chr15:100451770-100467296 | 11.16642667 | 25.6751     |
| Fam83h        | chr15:75831521-75844766   | 11.16401333 | 12.45363    |
| Pcdhgb6       | chr18:37901747-38001526   | 11.16244333 | 2.3372      |
| Dexi          | chr16:10530299-10543147   | 11.16097333 | 13.64023    |
| Pfdn4         | chr2:170321927-170344570  | 11.15578333 | 4.401596667 |
| Cr1s1         | chr2:132672401-132692504  | 11.15282667 | 47.2271     |
| Gm17066       | chr14:105505944-105513893 | 11.15057    | 15.40003333 |
| Cnn2          | chr10:79451344-79458145   | 11.15019    | 13.06662333 |
| Rgs12         | chr5:35292096-35376242    | 11.14661333 | 9.156576667 |
| Tgs1          | chr4:3502025-3543770      | 11.14592667 | 21.97643333 |
| Senp1         | chr15:97869174-97924000   | 11.14243    | 10.0126     |
| Mios          | chr6:8159226-8186273      | 11.13726667 | 12.54844667 |
| P2rx4         | chr5:123157565-123179051  | 11.13515333 | 14.6876     |
| Ctps2         | chrX:159339491-159472473  | 11.13507667 | 11.31647    |
| Adk           | chr14:21871795-22267791   | 11.13255    | 16.35913333 |
| Ints7         | chr1:193399612-193445570  | 11.13203667 | 14.3328     |
| Oas1a         | chr5:121346265-121357534  | 11.12800333 | 8.703606667 |
| Zfp263        | chr16:3744098-3750788     | 11.12731667 | 12.68484    |
| Fam98c        | chr7:29937528-29941229    | 11.11653333 | 10.98139333 |
| Ccnh          | chr13:85329081-85353328   | 11.11410333 | 5.89808     |
| Btd           | chr14:32454242-32481383   | 11.11067333 | 4.2039237   |
| Rint1         | chr5:23293561-23326187    | 11.10877667 | 7.702673333 |
| Oxnad1        | chr14:32898913-32916389   | 11.10546    | 3.26696     |
| Stamp         | chr6:83493199-83522498    | 11.10520667 | 17.05236667 |
| Rhoq          | chr17:87362450-87399409   | 11.09825    | 6.76105     |
| Cog4          | chr8:113370923-113406134  | 11.09780333 | 8.87563     |
| Sowaha        | chr11:53290079-53293697   | 11.09650667 | 11.41839067 |
| Rev1          | chr1:38109630-38186507    | 11.09362    | 10.50239    |
| H2-K2         | chr17:34111603-34115736   | 11.09351333 | 3.388146667 |
| Ankrd33b      | chr15:31221234-31297514   | 11.09313333 | 22.09373333 |
| Hsd3b7        | chr7:134944122-134947316  | 11.08715667 | 24.3339     |
| Pcmt2         | chr2:181572607-181592155  | 11.08246667 | 11.58347    |
| Samd9l        | chr6:3322256-3349571      | 11.08113667 | 8.502146667 |
| 4930590J08Rik | chr6:91854226-91900719    | 11.0801     | 2.041025333 |
| Ttc7b         | chr12:101538979-101759032 | 11.07649    | 10.29537333 |
| Wbp11         | chr6:136762174-136776737  | 11.07582667 | 13.557      |
| Acp1          | chr12:31578190-31596477   | 11.07164667 | 11.91249    |
| Cpt2          | chr4:107576586-107596194  | 11.07153333 | 7.057776667 |
| Slc39a13      | chr2:90901947-90910378    | 11.06637667 | 10.62627333 |
| Ern1          | chr11:106258933-106349110 | 11.06480667 | 11.33541667 |
| Zfp238        | chr1:179374791-179380897  | 11.05726    | 11.52159    |
| Calu          | chr6:29298118-29326675    | 11.05695    | 20.08766    |
| Mapk8         | chr14:34191083-34260344   | 11.05646667 | 10.39311667 |
| Ift46         | chr9:44581091-44600797    | 11.05330667 | 12.34974333 |
| Zufsp         | chr10:33646741-33671018   | 11.05322667 | 8.142906667 |
| Kctd15        | chr7:35424035-35437860    | 11.04924    | 16.62649    |
| Zfp397        | chr18:24113188-24123171   | 11.04699667 | 14.96733333 |
| Tmem104       | chr11:115048800-115108339 | 11.04687    | 9.44754     |
| 5730528L13Rik | chr4:48552817-48574792    | 11.04414333 | 16.66918667 |
| Cdca3         | chr6:124780193-124783719  | 11.03957    | 3.412633333 |
| Tbc1d14       | chr5:36833252-36928875    | 11.03929667 | 12.64736    |
| 2310001H18Rik | chr3:92770982-92772203    | 11.03914833 | 38.44983667 |

|               |                           |             |             |
|---------------|---------------------------|-------------|-------------|
| Nphp1         | chr2:127566467-127614590  | 11.03434    | 8.034013333 |
| 2610029I01Rik | chr4:21684528-21694358    | 11.03152667 | 5.26831     |
| Habp4         | chr13:64263173-64287845   | 11.02433    | 8.160526667 |
| Amz2          | chr11:109287259-109299462 | 11.01201    | 17.49009667 |
| Szt2          | chr4:118035344-118081868  | 11.00933667 | 6.855226667 |
| Pdlim4        | chr11:53868429-53882519   | 10.99724    | 12.93808333 |
| Rabep2        | chr7:133572280-133589421  | 10.99214    | 6.407286667 |
| Slc12a9       | chr5:137755785-137774810  | 10.98550667 | 11.28246667 |
| 1700056E22Rik | chr1:185856910-185857877  | 10.9845     | 4.023973333 |
| Cxx1c         | chrX:50911098-50912311    | 10.98302    | 9.944706667 |
| Zfp827        | chr8:81552335-81717665    | 10.97893667 | 23.84633333 |
| Ptp4a1        | chr1:30997147-31006600    | 10.97879667 | 16.55636667 |
| Purg          | chr8:34496796-34527941    | 10.97691333 | 5.466786667 |
| Polr2l        | chr7:148657758-148661052  | 10.97680667 | 9.311646667 |
| Sufu          | chr19:46471407-46561150   | 10.97398    | 3.293067667 |
| Pex3          | chr10:13243647-13272948   | 10.97208    | 14.6336     |
| Ifngr1        | chr10:19311763-19330031   | 10.97128667 | 17.0609     |
| Uggt1         | chr1:36196872-36301147    | 10.96882    | 14.0624     |
| Sestd1        | chr2:77018396-77118649    | 10.96324667 | 4.488203333 |
| Mapk12        | chr15:88961013-88971133   | 10.96219333 | 25.94451333 |
| Atg4a         | chrX:137491455-137598813  | 10.95857333 | 12.13929667 |
| Gpatch2       | chr1:189039389-189175308  | 10.95704333 | 10.70731    |
| Cul2          | chr18:3383222-3436698     | 10.95625333 | 12.36267    |
| Ormdl2        | chr10:128254512-128258687 | 10.955      | 16.0319     |
| Rsc1a1        | chr4:141239477-141241631  | 10.95496686 | 4.362722018 |
| Pcdhb18       | chr18:37649118-37654157   | 10.95471    | 3.433595667 |
| Kctd9         | chr14:68334154-68360367   | 10.95075    | 7.69853     |
| Fbxo32        | chr15:58007433-58046447   | 10.94882    | 8.359246667 |
| Zfp192        | chr13:21605089-21622983   | 10.94830667 | 9.60661     |
| Col27a1       | chr4:62876445-62996024    | 10.93249333 | 1.817161667 |
| Zscan21       | chr5:138558132-138575487  | 10.92969333 | 12.22115667 |
| Zfp87         | chr13:67616717-67627167   | 10.92612333 | 6.904926667 |
| Prpf40b       | chr15:99125839-99147438   | 10.92401333 | 8.840893333 |
| Thoc3         | chr13:54560197-54570201   | 10.91662333 | 13.80542333 |
| Morc3         | chr16:93832365-93876318   | 10.91576667 | 9.958723333 |
| Dtnbp1        | chr13:45017448-45097465   | 10.91294333 | 15.06586    |
| Idi1          | chr13:8884851-8891642     | 10.91254    | 28.2278     |
| Anpep         | chr7:86966688-86987238    | 10.90836    | 11.04726333 |
| Zfp280c       | chrX:45894802-45947629    | 10.90741333 | 15.12791    |
| Lymr2         | chr4:32887233-32889229    | 10.90035233 | 2.310892667 |
| Cdk2ap2       | chr19:4097350-4099017     | 10.89749    | 20.4814     |
| Muted         | chr13:38694574-38726978   | 10.89488667 | 4.564281333 |
| D3Ertd751e    | chr3:41546539-41562861    | 10.89488    | 5.967331    |
| Cops8         | chr1:92499999-92509916    | 10.88807333 | 7.167183967 |
| Hist1h2be     | chr13:23675538-23712993   | 10.88387    | 4.244613333 |
| 2810002N01Rik | chr12:112951479-112993266 | 10.88153667 | 9.25045     |
| Zfp955b       | chr17:33426488-33441634   | 10.87157    | 16.2013     |
| Mtg1          | chr7:147323462-147336685  | 10.87069    | 4.728636667 |
| Xrcc6         | chr15:81846798-81870514   | 10.86693333 | 7.604983333 |
| Kcns3         | chr12:11097007-11157648   | 10.85871333 | 9.902803333 |
| Atp5sl        | chr7:26404511-26410569    | 10.8587     | 13.85410333 |
| Fkrp          | chr7:17394615-17402081    | 10.85632667 | 23.20923333 |

|               |                           |             |             |
|---------------|---------------------------|-------------|-------------|
| Enpp2         | chr15:54670452-54751701   | 10.85344    | 19.94783333 |
| Pbld2         | chr10:62487259-62521560   | 10.85307967 | 4.903136667 |
| Pim1          | chr17:29627989-29632404   | 10.85302333 | 17.33083333 |
| Agfg2         | chr5:138092081-138125921  | 10.84844    | 11.88055    |
| Sap30bp       | chr11:115794972-115826848 | 10.84813667 | 9.699646667 |
| Psat1         | chr19:15979612-15999549   | 10.84606667 | 25.72383333 |
| Exosc2        | chr2:31526256-31536827    | 10.84602333 | 2.915526667 |
| Mif4gd        | chr11:115469232-115474283 | 10.84378333 | 16.96888333 |
| Hs3st1        | chr5:40005173-40035870    | 10.84011667 | 2.976915667 |
| Dffa          | chr4:148478261-148494759  | 10.83547333 | 17.14857333 |
| Galnt3        | chr2:65920822-65962850    | 10.8347     | 9.776513333 |
| Tmem139       | chr6:42211968-42214554    | 10.8279     | 1.149033333 |
| Fam198b       | chr3:79689851-79750200    | 10.82557333 | 0.592147    |
| Edc4          | chr8:108404850-108417107  | 10.81361    | 7.436666667 |
| Hs2st1        | chr3:144094070-144233180  | 10.8131     | 26.65906667 |
| Tipin         | chr9:64129413-64152599    | 10.80855    | 6.586547667 |
| Dcaf17        | chr2:70893800-70937199    | 10.80497333 | 12.37712667 |
| Mx1           | chr16:97668641-97684513   | 10.80210667 | 0.650487333 |
| Pole3         | chr4:62184834-62186048    | 10.80069667 | 15.74340667 |
| Pard6b        | chr2:167906503-167926703  | 10.79873333 | 16.02863333 |
| A830080D01Rik | chrX:155970599-156031013  | 10.79758667 | 11.12268333 |
| Sumo3         | chr10:77068978-77081076   | 10.79200333 | 20.39173333 |
| Naa25         | chr5:121847990-121890122  | 10.79164    | 9.561383333 |
| Slc25a44      | chr3:88214417-88229061    | 10.78786667 | 12.41256667 |
| Ces1b         | chr8:95580625-95603916    | 10.78724    | 6.499853333 |
| Tmed3         | chr9:89594040-89599881    | 10.78426667 | 24.13146667 |
| Furin         | chr7:87534079-87550317    | 10.78202    | 14.75093333 |
| Pde7a         | chr3:19125917-19211322    | 10.78046333 | 12.59639333 |
| Kat2a         | chr11:100566059-100573781 | 10.76646    | 21.36906667 |
| Mfhas1        | chr8:36650851-36742503    | 10.76417    | 10.45495333 |
| Timm44        | chr8:4259730-4275905      | 10.75982    | 18.42906    |
| Mob2          | chr7:149194457-149246939  | 10.75928    | 8.022258333 |
| Cep68         | chr11:20127039-20149427   | 10.74929    | 13.9053     |
| Ahr           | chr12:36182650-36219661   | 10.74531667 | 15.52795333 |
| Tgfbra1       | chr1:43104113-43155467    | 10.74207333 | 6.13914     |
| Hist1h2bn     | chr13:21845991-21846372   | 10.74116667 | 14.19872333 |
| Smarcad1      | chr6:64992660-65066043    | 10.73575    | 15.509      |
| Mmp11         | chr10:75385968-75395208   | 10.73496    | 9.579729867 |
| Pdk1          | chr2:71711328-71741915    | 10.73346333 | 8.361393333 |
| Nek3          | chr8:23238754-23276907    | 10.73049333 | 6.296026667 |
| Usp37         | chr1:74482083-74590860    | 10.73008667 | 12.52630333 |
| Zfp180        | chr7:24866962-24892234    | 10.72781667 | 17.0024     |
| Chml          | chr1:177612368-177618484  | 10.72749    | 13.62338667 |
| Asb7          | chr7:73789456-73834447    | 10.72721333 | 12.98886667 |
| Hccs          | chrX:165749462-165758275  | 10.72303667 | 11.63640667 |
| Fbxo8         | chr8:59029930-59072736    | 10.72241    | 10.97646333 |
| Tchp          | chr5:115157787-115172336  | 10.71993333 | 6.989143333 |
| Zbtb7b        | chr3:89181567-89197125    | 10.71570667 | 13.32992    |
| Sh3gl1        | chr17:56156172-56176060   | 10.71274    | 16.60933333 |
| Znhit3        | chr11:84724456-84729858   | 10.71126667 | 15.11429667 |
| AU040320      | chr4:126430798-126546938  | 10.71049667 | 15.42273333 |
| Naa50         | chr16:44139921-44163477   | 10.70894    | 15.06209    |

|               |                           |             |             |
|---------------|---------------------------|-------------|-------------|
| Nfic          | chr10:80858935-80889918   | 10.70866    | 9.231016667 |
| Socs3         | chr11:117827400-117830680 | 10.70763333 | 4.494836667 |
| Ecsit         | chr9:21876689-21889871    | 10.70485333 | 8.654346667 |
| Ppp1r12b      | chr1:136662519-136852517  | 10.70292    | 8.13257     |
| Nubp1         | chr16:10412030-10424518   | 10.7029     | 10.4791     |
| Slc4a8        | chr15:100592177-100654402 | 10.6953     | 4.88648     |
| D330023K18Rik | chr2:31006568-31007811    | 10.695015   | 0.18615     |
| Pgls          | chr8:74116082-74120166    | 10.69396667 | 22.38594333 |
| Nsdhl         | chrX:70163859-70203867    | 10.67848667 | 18.81601667 |
| Zfp639        | chr3:32409471-32419755    | 10.67827    | 12.76685333 |
| Pop4          | chr7:39047838-39056367    | 10.67699333 | 6.283177667 |
| Ptdss1        | chr13:67033765-67099337   | 10.67344    | 10.62893667 |
| Mis12         | chr11:70833112-70840636   | 10.66932667 | 12.52494    |
| Ccdc84        | chr9:44218246-44226090    | 10.66777667 | 18.06932333 |
| lpmk          | chr10:70810540-70848633   | 10.66580667 | 9.347316667 |
| Keap1         | chr9:21034173-21043776    | 10.66369    | 7.129043333 |
| Zfp592        | chr7:88138569-88190048    | 10.65876333 | 10.54884667 |
| 2900092E17Rik | chr7:134158564-134160866  | 10.65790667 | 11.91351333 |
| Mfsd8         | chr3:40622093-40650776    | 10.65718667 | 9.26956     |
| Apool         | chrX:109425016-109486039  | 10.65626667 | 13.62063667 |
| Nek4          | chr14:31764673-31800587   | 10.65608333 | 6.090906667 |
| Mtm1          | chrX:68463941-68568470    | 10.65495333 | 5.257406667 |
| Bcas1         | chr2:170172490-170253345  | 10.65443    | 3.871607333 |
| Sgk3          | chr1:9788210-9892649      | 10.65327    | 11.45272    |
| Tnk1          | chr11:69664064-69672232   | 10.65032333 | 9.165786667 |
| Rpgr          | chrX:9735341-9793921      | 10.64204333 | 7.785683333 |
| Ints10        | chr8:71317852-71351543    | 10.64027    | 11.87778333 |
| Pdcd5         | chr7:36427003-36432501    | 10.63896667 | 10.96381667 |
| Slc25a36      | chr9:96977429-97011460    | 10.63879667 | 18.58653333 |
| Tada2b        | chr5:36816318-36826934    | 10.63777333 | 9.171886667 |
| Rad51l3       | chr11:82686566-82704117   | 10.63658333 | 9.08582     |
| H2-T24        | chr17:36142639-36157505   | 10.63286667 | 9.54795     |
| Fbl           | chr7:28954766-28964288    | 10.62674667 | 7.757166667 |
| Ier5          | chr1:156943496-156946766  | 10.62430333 | 20.55333333 |
| Rptor         | chr11:119464308-119760905 | 10.62094    | 12.3012     |
| Chn2          | chr6:53989925-54251806    | 10.61722333 | 51.58623333 |
| L3mbtl2       | chr15:81494365-81518735   | 10.61464333 | 5.578936667 |
| Lypd5         | chr7:25134242-25138852    | 10.61200667 | 37.14353333 |
| Smarca5-ps    | chr4:145054112-145057864  | 10.60518333 | 4.494903333 |
| C2cd2         | chr16:98076815-98144243   | 10.59942    | 8.550253333 |
| Nubp2         | chr17:25019555-25023295   | 10.59735    | 14.08883333 |
| Stam          | chr2:13995738-14069957    | 10.59474    | 12.8119     |
| Mthfs         | chr9:89106027-89135063    | 10.5896     | 8.511343333 |
| Renbp         | chrX:71167459-71176189    | 10.58201    | 3.798819    |
| 2210016F16Rik | chr13:58481406-58486586   | 10.57885667 | 10.89018667 |
| E030024N20Rik | chr19:16238587-16244948   | 10.57540667 | 13.5275     |
| Dtd1          | chr2:144425688-144594483  | 10.56764667 | 26.56246667 |
| Fam160a2      | chr7:112519724-112548568  | 10.56756    | 4.89918     |
| Tmem18        | chr12:31269307-31276084   | 10.56572667 | 2.45332     |
| Lcmt1         | chr7:130521495-130573872  | 10.56435    | 5.447243333 |
| Tsc22d4       | chr5:138187196-138209681  | 10.56013667 | 8.34329     |
| Ofd1          | chrX:162827964-162878636  | 10.55608333 | 9.774326667 |



|               |                               |             |             |
|---------------|-------------------------------|-------------|-------------|
| Tmub1         | chr5:23951280-23953664        | 10.55561    | 8.000236667 |
| Jkamp         | chr12:73186825-73202514       | 10.55100333 | 8.596426667 |
| Cenpc1        | chr5:86441049-86494608        | 10.54906333 | 14.77536667 |
| Tfdp1         | chr8:13339673-13377702        | 10.54782667 | 20.04466667 |
| Prkrir        | chr7:105851872-105866571      | 10.53819667 | 15.20703333 |
| Tmem68        | chr4:3476187-3501915          | 10.53659333 | 13.56045333 |
| 1190002N15Rik | chr9:94418282-94438500        | 10.53457333 | 11.4617     |
| Crtc1         | chr8:72906256-72963472        | 10.53152    | 15.12036667 |
| Myef2         | chr2:124912006-124949396      | 10.52701667 | 25.48176667 |
| Pcdhb5        | chr18:37480034-37483567       | 10.52547333 | 7.295453333 |
| Dis3l2        | chr1:88600378-88946672        | 10.52381333 | 7.580506667 |
| Trappc9       | chr15:72420049-72891634       | 10.52160667 | 9.763676667 |
| Arrb1         | chr7:106683995-106755281      | 10.52018333 | 15.79666667 |
| Zfp133-ps     | chr2:144285015-144293530      | 10.51838    | 10.3476     |
| Dnajc6        | chr4:101169252-101315404      | 10.51487667 | 15.2694     |
| Stard7        | chr2:127095964-127124670      | 10.51386667 | 19.34973333 |
| Kctd17        | chr15:78259057-78269733       | 10.51262667 | 8.231263333 |
| Ap1s1         | chr5:137510863-137521930      | 10.51247    | 8.88485     |
| Commd10       | chr18:47118529-47247648       | 10.50461333 | 16.94961667 |
| Zfp825        | chr13:74617504-74631398       | 10.50391667 | 7.499233333 |
| 4922501L14Rik | chr3:154374096-154411976      | 10.49957333 | 5.720939667 |
| Pias2         | chr18:77303946-77394447       | 10.49942333 | 27.8611     |
| AU023871      | chr17:35199637-35203129       | 10.49920333 | 16.03934667 |
| Tmtc1         | chr6:148180951-148392874      | 10.49482    | 10.65115333 |
| Hars          | chr18:36926181-36942859       | 10.49025333 | 16.04896667 |
| Fmn1          | chr2:113167892-113556924      | 10.48922667 | 8.055733333 |
| Nuak2         | chr1:134212701-134230065      | 10.48758667 | 22.1551     |
| Sdcbp2        | chr2:151398367-151415735      | 10.48542    | 2.536748333 |
| Axin1         | chr17:26275630-26332756       | 10.48030333 | 13.45223333 |
| Fam20b        | chr1:158608701-158649041      | 10.47579    | 12.583      |
| Cxx1a         | chrX:50945665-50946940        | 10.47428667 | 4.36093     |
|               | 10-Sep chr5:93522482-93603984 | 10.47390333 | 16.95943333 |
| Tprkb         | chr6:85865712-85880278        | 10.47171    | 7.869366667 |
| Sdhaf1        | chr7:31106427-31107394        | 10.46985333 | 29.25486667 |
| Parp6         | chr9:59465090-59498097        | 10.46627    | 10.42608    |
| Tiprl         | chr1:167142416-167167089      | 10.46550667 | 7.195756667 |
| Spg7          | chr8:125589407-125621651      | 10.46263    | 12.94138333 |
| Nod2          | chr8:91171245-91212373        | 10.45103333 | 7.169983333 |
| Camsap3       | chr8:3587449-3609075          | 10.45023333 | 19.464      |
| Atg2b         | chr12:106851748-106923451     | 10.45002    | 9.959566667 |
| Txlng         | chrX:159216850-159267331      | 10.44757667 | 11.5656     |
| Tbp           | chr17:15636851-15654391       | 10.44631667 | 8.43275     |
| B230217C12Rik | chr11:97702093-97704357       | 10.44409333 | 0.841420667 |
| Hmg20b        | chr10:80808790-80813202       | 10.44157667 | 8.136636667 |
| Mtmr6         | chr14:60884041-60921208       | 10.43855    | 9.59879     |
| Mrps25        | chr6:92119516-92134017        | 10.43508    | 4.256616667 |
| Fam53c        | chr18:34918559-34933414       | 10.43392    | 19.26316667 |
| Cbr3          | chr16:93683463-93691236       | 10.43232    | 25.34036667 |
| 1110014N23Rik | chr19:6067841-6077187         | 10.43147    | 18.05333333 |
| Wdr45         | chrX:7299374-7305327          | 10.42954667 | 9.616243333 |
| Fndc1         | chr17:7931432-7997839         | 10.42925667 | 13.06567333 |
| Hspa14        | chr2:3406125-3430086          | 10.42157667 | 6.802536667 |

|               |                           |             |             |
|---------------|---------------------------|-------------|-------------|
| Nde1          | chr16:14163367-14193016   | 10.42121233 | 11.94974667 |
| A330032B11Rik | chr19:37248332-37271031   | 10.41949333 | 0.123327533 |
| Thra          | chr11:98603186-98626425   | 10.41723667 | 12.17916333 |
| Mrc1          | chr2:14151040-14253650    | 10.41619333 | 0.135019933 |
| Osbpl8        | chr10:110601857-110734303 | 10.41564    | 11.50771    |
| Snopc2        | chr8:4253101-4256220      | 10.41191667 | 7.159374333 |
| Frat2         | chr19:41920464-41922622   | 10.41069    | 13.88445333 |
| Dcun1d1       | chr3:35791026-35831888    | 10.40482667 | 12.08833667 |
| 6230409E13Rik | chr4:21858472-21928608    | 10.40444667 | 14.8656     |
| Mdfic         | chr6:15670660-15752169    | 10.40218    | 3.062706667 |
| Yeats2        | chr16:20141135-20232646   | 10.39999    | 13.23991    |
| Tubgcp2       | chr7:147181853-14722249   | 10.39418333 | 9.847186667 |
| Dirc2         | chr16:35694988-35769442   | 10.39182    | 10.89389667 |
| Vps11         | chr9:44156187-44169753    | 10.38703667 | 9.509383333 |
| Clstn1        | chr4:148960746-149022008  | 10.38602667 | 15.60935    |
| Ankzf1        | chr1:75188708-75195960    | 10.38586    | 3.960236667 |
| Rbm34         | chr8:129471072-129494979  | 10.38584667 | 8.598613333 |
| Abca2         | chr2:25284193-25304059    | 10.38572667 | 13.0316     |
| Mllt3         | chr4:87415828-87679311    | 10.38167333 | 21.44946667 |
| Gstcd         | chr3:132645514-132754704  | 10.38135333 | 10.98712    |
| Mex3d         | chr10:79843099-79850396   | 10.38001    | 7.35739     |
| Stoml2        | chr4:43040561-43044256    | 10.37863667 | 7.955686667 |
| D3Ert254e     | chr3:36050001-36069263    | 10.37596667 | 7.37489     |
| Arfgap1       | chr2:180701929-180717229  | 10.37553333 | 19.41956667 |
| Ado           | chr10:67007258-67011703   | 10.37357667 | 7.569186667 |
| Arfgef2       | chr2:166631080-166723551  | 10.35435333 | 10.98436    |
| Adam17        | chr12:21329369-21379452   | 10.34757    | 11.39564333 |
| Fhod3         | chr18:24867945-25292002   | 10.34616333 | 1.611446467 |
| Mblac2        | chr13:81850415-81892274   | 10.34462667 | 7.315923333 |
| Fam100b       | chr11:116295407-116300391 | 10.34366667 | 6.8581      |
| Pigf          | chr17:87396598-87424741   | 10.33959667 | 7.871616667 |
| Vezt          | chr10:93430844-93498493   | 10.33554    | 10.34267667 |
| Idh3a         | chr9:54434317-54452469    | 10.33538    | 16.02243333 |
| Osbpl3        | chr6:50243325-50406169    | 10.33427    | 7.284283333 |
| Phb           | chr11:95528270-95542087   | 10.33339    | 8.30552     |
| Mnat1         | chr12:74224703-74374975   | 10.33117333 | 8.833926667 |
| Wdr20b        | chr12:66326503-66329441   | 10.33021    | 0.659148333 |
| Exoc7         | chr11:116149311-116168052 | 10.32934667 | 8.526796667 |
| D130017N08Rik | chr5:144519222-144525811  | 10.32887    | 1.692596667 |
| 1810026B05Rik | chr7:80684683-80703281    | 10.32844667 | 11.25799    |
| Leng9         | chr7:4099784-4101474      | 10.32755    | 2.850846667 |
| Zfp105        | chr9:122832195-122840146  | 10.32624333 | 5.291533333 |
| 2210403K04Rik | chr11:75275040-75280192   | 10.32452333 | 4.210276667 |
| Rbp1          | chr9:98323379-98346969    | 10.32272    | 8.10989     |
| lsg20l2       | chr3:87734235-87744608    | 10.32201667 | 14.16992667 |
| 2410089E03Rik | chr15:8119105-8221158     | 10.31642    | 10.59160333 |
| Gnl1          | chr17:36116899-36126407   | 10.31227667 | 4.742592    |
| Psmg1         | chr16:96201541-96212510   | 10.30844    | 21.75046667 |
| Trmt61a       | chr12:112916315-112922113 | 10.30455    | 4.61019     |
| Flad1         | chr3:89206594-89215785    | 10.30426333 | 5.865013333 |
| Eml6          | chr11:29643050-29926033   | 10.29662333 | 5.21369     |
| 9130023H24Rik | chr7:135377964-135381545  | 10.29477667 | 11.926386   |

|               |                           |             |             |
|---------------|---------------------------|-------------|-------------|
| E2f4          | chr8:107821562-107829270  | 10.29301667 | 11.35854333 |
| Itgb5         | chr16:33829750-33949424   | 10.28959667 | 11.30574333 |
| Fam45a        | chr19:60887472-60912132   | 10.28737667 | 4.458893333 |
| Rangrf        | chr11:68785988-68787322   | 10.281556   | 4.301286667 |
| Tmem55a       | chr4:14791365-14842407    | 10.28010667 | 10.92874    |
| Tnfrsf1a      | chr6:125299740-125312501  | 10.28007333 | 9.808643333 |
| Cdk9          | chr2:32561301-32568304    | 10.27393333 | 10.86494    |
| Snx15         | chr19:6119403-6128215     | 10.27393    | 15.2464     |
| Ndst1         | chr18:60845629-60873043   | 10.27102    | 11.09565    |
| Mtor          | chr4:147822690-147931794  | 10.26591667 | 14.37885667 |
| Ptbp2         | chr3:119421659-119486306  | 10.25896    | 17.45100667 |
| Mrpl55        | chr11:59016018-59019504   | 10.25619667 | 13.90406667 |
| Usp54         | chr14:21368133-21437576   | 10.25191    | 9.63382     |
| 6330409N04Rik | chr14:62153141-62175723   | 10.25066    | 19.75453333 |
| Sh3rf1        | chr8:63702967-63874869    | 10.24373    | 8.68061     |
| Prss8         | chr7:135069230-135073627  | 10.23746    | 14.6425     |
| Ube3a         | chr7:66484119-66562097    | 10.23288    | 13.29145333 |
| Tmed1         | chr9:21311823-21314630    | 10.22574    | 6.489253333 |
| Cd2bp2        | chr7:134335173-134339514  | 10.22421    | 9.850836667 |
| Idua          | chr5:109098124-109113577  | 10.21699667 | 6.593216667 |
| BC024978      | chr7:27980799-27989339    | 10.21234667 | 9.305664    |
| Slc44a4       | chr17:35051410-35067381   | 10.20867667 | 12.02911    |
| Rpusd1        | chr17:25864695-25868401   | 10.20771    | 5.392606667 |
| Fam166a       | chr2:25074264-25077801    | 10.20502667 | 22.05949    |
| Ctsc          | chr7:95426602-95459385    | 10.20312333 | 43.58383333 |
| Aox4          | chr1:58267240-58325440    | 10.20086    | 20.65236667 |
| Tmem106a      | chr11:101443555-101453099 | 10.19969    | 14.76408    |
| Ccrl1         | chr9:104000467-104028973  | 10.19837333 | 2.196724333 |
| Ksr2          | chr5:117864010-118217997  | 10.19710667 | 5.867936667 |
| Dos           | chr10:79593178-79602112   | 10.19304    | 22.55723333 |
| 1110051M20Rik | chr2:91117984-91284799    | 10.19233667 | 7.693963333 |
| Acrbp         | chr6:124999944-125013283  | 10.19169667 | 10.01223667 |
| Cdk5          | chr5:23924059-23929348    | 10.19154333 | 8.328856667 |
| Wdr82         | chr9:106073259-106094037  | 10.19099333 | 18.25882333 |
| Maml3         | chr3:51491534-51908928    | 10.18777333 | 17.18716667 |
| Uap1          | chr1:172072133-172105077  | 10.18657333 | 9.62756     |
| Hmgcr         | chr13:97418918-97440891   | 10.18443333 | 27.34123333 |
| 4930405J17Rik | chr10:19919052-19921660   | 10.18123333 | 8.752886667 |
| St6galnac3    | chr3:152865472-153388097  | 10.17839667 | 4.327042667 |
| Ctnnd2        | chr15:30102347-30959098   | 10.17752333 | 10.95120333 |
| 2010106G01Rik | chr2:126716130-126758971  | 10.17594667 | 18.3442     |
| Zbtb9         | chr17:27110123-271113148  | 10.17377333 | 7.156536667 |
| Casp6         | chr3:129604342-129617020  | 10.17221333 | 16.2967     |
| 1110018J18Rik | chr13:64393143-64414018   | 10.17006    | 15.91850333 |
| Plxna4        | chr6:32094558-32538192    | 10.16893    | 27.99673333 |
| 1700021K19Rik | chr16:32821787-32868452   | 10.16669    | 8.25298     |
| Mrps10        | chr17:47505835-47515628   | 10.16659333 | 11.09067    |
| Pop7          | chr5:137942666-137943657  | 10.15361667 | 7.797850333 |
| Elf4          | chrX:45764225-45816309    | 10.15202667 | 4.779923333 |
| Timm8a1       | chrX:131071796-131076168  | 10.14957333 | 15.13405667 |
| Th1l          | chr2:174241304-174253003  | 10.14059667 | 22.29583333 |
| Dsg1b         | chr18:20535335-20568242   | 10.13867    | 64.8479     |

|               |                           |             |             |
|---------------|---------------------------|-------------|-------------|
| Bst2          | chr8:74058160-74061336    | 10.1384     | 10.08076667 |
| Rab3gap1      | chr1:129765349-129840453  | 10.13838    | 8.371643333 |
| Depdc5        | chr5:33206369-33336882    | 10.13338    | 9.683523333 |
| Dpm1          | chr2:168034547-168055879  | 10.13161333 | 13.85094667 |
| Ube2q2        | chr9:54997175-55055336    | 10.12382333 | 9.90529     |
| Clns1a        | chr7:104845166-104869303  | 10.12364333 | 16.66796667 |
| Sdr42e1       | chr8:120185298-120195415  | 10.11941    | 7.130017667 |
| 2610528J11Rik | chr4:118199879-118202822  | 10.11939667 | 13.05559567 |
| Mtx1          | chr3:89013002-89018257    | 10.11466333 | 4.48086     |
| Aldh6a1       | chr12:85771667-85791900   | 10.11386    | 7.712853333 |
| H2afv         | chr11:6327228-6344446     | 10.11339    | 11.57347667 |
| Nup155        | chr15:8059312-8109859     | 10.10900333 | 6.542666667 |
| Sertad1       | chr7:28271971-28275333    | 10.10731667 | 16.80127667 |
| Riok2         | chr17:17511295-17531863   | 10.10657333 | 6.643936667 |
| Hspb11        | chr4:106926538-106952493  | 10.10276667 | 15.79997    |
| Pkp3          | chr7:148264127-148276409  | 10.10201333 | 24.05146667 |
| Mepce         | chr5:138223133-138227929  | 10.10196333 | 16.10276667 |
| Rabif         | chr1:136391236-136404461  | 10.10062    | 14.38449667 |
| Wdr67         | chr15:57743753-57801623   | 10.09766333 | 6.435996667 |
| Fam129a       | chr1:153418502-153566477  | 10.09702333 | 0.216505667 |
| Slc35c2       | chr2:165102021-165113338  | 10.09261333 | 12.81451667 |
| Atp7a         | chrX:103222614-103323499  | 10.09126    | 13.93443333 |
| Zfp7          | chr15:76709705-76722824   | 10.08979    | 19.79486667 |
| Zfp318        | chr17:46520714-46557867   | 10.08948667 | 16.00506667 |
| Pigg          | chr5:108741943-108777798  | 10.08866    | 2.737773333 |
| Cyp20a1       | chr1:60400215-60444231    | 10.08744    | 15.23015667 |
| Gltscr1       | chr7:16556610-16584844    | 10.08127667 | 13.16375333 |
| Acad11        | chr9:103966032-104029976  | 10.07808    | 5.901722333 |
| Neur14        | chr11:69715379-69727324   | 10.07805    | 7.981133333 |
| Tubb4a        | chr17:57219488-57227205   | 10.07583    | 56.53233333 |
| Yrdc          | chr4:124528002-124532486  | 10.07516    | 15.63184    |
| Hist1h2bj     | chr13:22135098-22135479   | 10.07486667 | 16.14053333 |
| Fut1          | chr7:52872975-52876427    | 10.07151333 | 4.708126667 |
| Sim2          | chr16:94085504-94348638   | 10.07052333 | 12.06208667 |
| Rqcd1         | chr1:74552633-74577416    | 10.07002    | 6.014336667 |
| Gmeb1         | chr4:131776939-131817464  | 10.06527667 | 11.04426667 |
| Pxn           | chr5:115956710-116005995  | 10.06464667 | 11.43699667 |
| Zfp810        | chr9:22081191-22112082    | 10.06458333 | 5.732613    |
| 6030458C11Rik | chr15:12737931-12754412   | 10.06192333 | 11.83294667 |
| Mocs1         | chr17:49567688-49594755   | 10.05831667 | 15.23960667 |
| Zbtb6         | chr2:37281019-37286439    | 10.05746333 | 10.36779    |
| Ctsz          | chr2:174252994-174264493  | 10.05714    | 25.1028     |
| Lpar6         | chr14:73637697-73640165   | 10.05661333 | 10.17851333 |
| Zswim1        | chr2:164648185-164652367  | 10.05328    | 5.059253333 |
| Ficd          | chr5:114185790-114190616  | 10.04603333 | 6.504326667 |
| Ino80e        | chr7:133995946-134004977  | 10.04383333 | 5.235363333 |
| F2rl1         | chr13:96281683-96295195   | 10.04366    | 7.54809     |
| Coq4          | chr2:29643782-29653263    | 10.04030667 | 9.04021     |
| Sh3pxd2a      | chr19:47334663-47538901   | 10.03863    | 22.3826     |
| Kctd2         | chr11:115281439-115292588 | 10.03229333 | 21.64067667 |
| Ccdc64b       | chr17:23797489-23805586   | 10.02948    | 8.01411     |
| Utp14a        | chrX:45610110-45635626    | 10.02902333 | 17.05454    |

|               |                           |             |             |
|---------------|---------------------------|-------------|-------------|
| Ldhd          | chr6:142438768-142456463  | 10.02539667 | 11.83553667 |
| Prss37        | chr6:40464822-40469507    | 10.02014667 | 4.55164     |
| Wdr70         | chr15:7823054-8049209     | 10.01878    | 3.679597667 |
| 2810002D19Rik | chr2:94246863-94251837    | 10.01807667 | 5.570313333 |
| 2310037I24Rik | chr15:98349531-98364652   | 10.01661    | 8.69317     |
| Gimap1        | chr6:48689045-48693794    | 10.01388333 | 0.087145    |
| Cyp4v3        | chr8:46391155-46418550    | 10.01376333 | 4.725532333 |
| Ifnar1        | chr16:91485459-91510767   | 10.01246667 | 8.826766667 |
| Rnaseh2a      | chr8:87480508-87489910    | 10.01199667 | 2.988945667 |
| Dkc1          | chrX:72341192-72355115    | 10.00973    | 13.79922    |
| Ccm2          | chr11:6446889-6496764     | 10.00872667 | 11.60038667 |
| Lrrc57        | chr2:120429973-120435244  | 10.00152667 | 11.25221    |
| Zfp715        | chr7:50551892-50568631    | 9.997846667 | 8.849146667 |
| 4933427D14Rik | chr11:71967598-72016873   | 9.98378     | 8.524673333 |
| Atf7          | chr15:102367074-102455852 | 9.983523333 | 6.639936667 |
| Zfp61         | chr7:25076064-25084568    | 9.98003     | 7.778956667 |
| Tep1          | chr14:51443735-51490229   | 9.977503333 | 4.942016667 |
| Cdkal1        | chr13:29417174-29947457   | 9.976903333 | 21.38043333 |
| St3gal5       | chr6:72047606-72104564    | 9.976043333 | 2.483516667 |
| Prp2          | chr6:132545963-132550720  | 9.973806667 | 0           |
| Zfp422        | chr6:116574033-116578995  | 9.96759     | 18.28083333 |
| Tm2d2         | chr8:26127682-26133732    | 9.966496667 | 46.91333333 |
| 4930455C21Rik | chr16:38497924-38522747   | 9.959573333 | 11.48211333 |
| Usp45         | chr4:21703416-21765019    | 9.958146667 | 5.268756667 |
| Mal2          | chr15:54402920-54434401   | 9.956163333 | 18.17223333 |
| Mrpl21        | chr19:3283046-3292837     | 9.952556667 | 7.66438     |
| Pdf           | chr8:109570189-109572514  | 9.949683333 | 11.50727333 |
| Mthfd2        | chr6:83255697-83267598    | 9.948656667 | 2.91895     |
| Nol11         | chr11:107027974-107050695 | 9.946263333 | 11.51321667 |
| Zfp428        | chr7:25292105-25300701    | 9.941493333 | 30.46593333 |
| Casp7         | chr19:56471618-56516833   | 9.932103333 | 1.815721233 |
| Syt11         | chr4:132809004-132819002  | 9.931096667 | 24.96379333 |
| Pdcd11        | chr19:47165255-47205635   | 9.92424     | 7.88168     |
| Ing3          | chr6:21899614-21926037    | 9.923783333 | 4.702546333 |
| Ttc4          | chr4:106334412-106351549  | 9.919646667 | 18.32803333 |
| Serac1        | chr17:6040570-6079739     | 9.919153333 | 9.851103333 |
| Cbll1         | chr12:32169693-32184481   | 9.91908     | 17.62676667 |
| Yipf2         | chr9:21393125-21397275    | 9.918916667 | 31.08326    |
| Coro1c        | chr5:114292447-114358715  | 9.916316667 | 20.75916667 |
| Acbd4         | chr11:102963001-102973513 | 9.913443333 | 1.775077    |
| Fam76b        | chr9:13632170-13650966    | 9.913273333 | 9.396363333 |
| Nt5m          | chr11:59661574-59690035   | 9.912946667 | 11.84973667 |
| Pex1          | chr5:3596065-3637101      | 9.912506667 | 8.620973333 |
| Ap1m1         | chr8:74764030-74781278    | 9.91182     | 9.146523333 |
| Btbd2         | chr10:80105361-80119816   | 9.907563333 | 8.08375     |
| Ubxn8         | chr8:34730057-34752448    | 9.905536667 | 10.78449667 |
| Myo19         | chr11:84693721-84724633   | 9.90473     | 12.47123333 |
| Mtpap         | chr18:4375589-4397328     | 9.895363333 | 23.413      |
| Prpf4         | chr4:62069816-62088024    | 9.890186667 | 8.838706667 |
| Cacna2d3      | chr14:29718128-30535050   | 9.888346667 | 0.535027    |
| 4933439F18Rik | chr11:60230646-60258779   | 9.88571     | 11.6975     |
| Ppp6r2        | chr15:89041989-89116692   | 9.879523333 | 8.704436667 |

|               |                           |             |             |
|---------------|---------------------------|-------------|-------------|
| Zfp608        | chr18:55047698-55149834   | 9.87929     | 5.04361     |
| 2310040G24Rik | chr6:86433369-86438221    | 9.873283333 | 4.931883    |
| 1700096K18Rik | chr5:25035835-25037284    | 9.872516667 | 1.319124    |
| Prmt3         | chr7:57033727-57113635    | 9.870083333 | 5.523793333 |
| Myo9a         | chr9:59598980-59776673    | 9.867426667 | 9.18013     |
| lfi44         | chr3:151393886-151412923  | 9.865793333 | 5.228393    |
| Ptcd1         | chr5:145908246-145927973  | 9.86541     | 2.568436667 |
| Ccdc109b      | chr3:129617877-129673124  | 9.85972     | 11.91830667 |
| 1110002N22Rik | chr11:79950179-79955655   | 9.85745     | 2.347096667 |
| Slc38a6       | chr12:74387834-74455032   | 9.855       | 14.50765333 |
| Dcn           | chr10:96942133-96980796   | 9.854014    | 44.94876667 |
| Zfyve1        | chr12:84887890-84938097   | 9.853546667 | 8.753627    |
| Aaas          | chr15:102168677-102181190 | 9.85264     | 12.31313667 |
| Fbxo3         | chr2:103867955-103903394  | 9.85258     | 9.303966667 |
| Coq7          | chr7:125668575-125676827  | 9.850246667 | 32.58246667 |
| Grpel2        | chr18:61872077-61885985   | 9.848383333 | 16.84320667 |
| Tfpt          | chr7:3571925-3581486      | 9.840646667 | 10.45727    |
| Lmf2          | chr15:89181434-89186090   | 9.840603333 | 14.9362     |
| Vps33a        | chr5:123978768-124023024  | 9.839793333 | 17.73085667 |
| Pigx          | chr16:32084501-32099813   | 9.83139     | 10.55177333 |
| Hltf          | chr3:19957810-20018376    | 9.829853333 | 9.391406667 |
| Cxcl2         | chr5:91332924-91334964    | 9.827346667 | 12.07494    |
| Tmem199       | chr11:78320556-78325670   | 9.826466667 | 8.745333333 |
| Rexo4         | chr2:26809082-26819906    | 9.82298     | 8.507096667 |
| Nelf          | chr2:24909898-24918401    | 9.820263333 | 9.936946667 |
| Sec23ip       | chr7:135888383-135928349  | 9.81751     | 9.041763333 |
| Clec16a       | chr16:10545431-10744971   | 9.816126667 | 7.124306667 |
| Senp5         | chr16:31959755-32003373   | 9.814073333 | 7.15262     |
| Slc31a2       | chr4:61947478-61959445    | 9.81097     | 34.30296667 |
| Gtf3c3        | chr1:54454424-54495815    | 9.809793333 | 9.93302     |
| Tnfrsf12a     | chr17:23812411-23814416   | 9.791896667 | 10.94802333 |
| Ube2a         | chrX:34414360-34424215    | 9.782223333 | 11.08668667 |
| 2310034C09Rik | chr16:88759091-88760034   | 9.78196     | 7.473959    |
| Nipal3        | chr4:135004815-135050419  | 9.781486667 | 16.6292     |
| Afap1l2       | chr19:56986843-57083065   | 9.774023333 | 9.708463333 |
| Usp42         | chr5:144471194-144493149  | 9.77281     | 8.76485     |
| Prorsd1       | chr11:29411756-29415033   | 9.77277     | 16.94387333 |
| Thyn1         | chr9:26807261-26814919    | 9.77187     | 10.86592667 |
| Glrx2         | chr1:145586478-145596808  | 9.770426667 | 12.9071     |
| Dr1           | chr5:108697915-108709540  | 9.765403333 | 9.663876667 |
| Gtf2h1        | chr7:54051463-54079170    | 9.76307     | 7.579166667 |
| Cyb561d1      | chr3:107998688-108003752  | 9.759313333 | 8.290286667 |
| Iars2         | chr1:187110540-187153280  | 9.759096667 | 10.49846    |
| Sp4           | chr12:119473405-119539913 | 9.75791     | 14.93272667 |
| Rab36         | chr10:74499833-74516845   | 9.757883333 | 10.66182333 |
| 0610010F05Rik | chr11:23473775-23533631   | 9.750806667 | 14.98006667 |
| Srd5a3        | chr5:76569297-76584528    | 9.74989     | 3.254973333 |
| Tmem165       | chr5:76612904-76638269    | 9.74928     | 25.38016667 |
| Vapb          | chr2:173563071-173609837  | 9.74821     | 8.573333333 |
| Cby1          | chr15:79489656-79498090   | 9.747943333 | 10.74183    |
| Ctdspl2       | chr2:121782188-121839322  | 9.747583333 | 8.64888     |
| Rdh14         | chr12:10397585-10402368   | 9.74617     | 13.70207    |

|               |                           |             |             |
|---------------|---------------------------|-------------|-------------|
| Wdyhv1        | chr15:57972990-57990209   | 9.746043333 | 12.35786333 |
| 1810055G02Rik | chr19:3708332-3717881     | 9.743976667 | 10.40628333 |
| Oas1g         | chr5:121326150-121337607  | 9.742606667 | 3.273093333 |
| Hist1h2bf     | chr13:23665678-23666059   | 9.742336667 | 9.80117     |
| Tnfrsf19      | chr14:61582670-61665692   | 9.74145     | 21.26723333 |
| Atg9a         | chr1:75177439-75188497    | 9.74131     | 14.86307    |
| 2700054A10Rik | chr17:13679886-13746960   | 9.74003     | 2.51383     |
| Car15         | chr16:17835368-17838279   | 9.739923333 | 4.685503333 |
| Fam189a1      | chr7:71900981-72301414    | 9.73965     | 0.009366733 |
| Ulk2          | chr11:61589099-61668594   | 9.73433     | 8.692946667 |
| Pik3r4        | chr9:105545324-105589985  | 9.732653333 | 10.72389667 |
| 2310042D19Rik | chr4:155590035-155595416  | 9.725513333 | 7.15004     |
| Impact        | chr18:13130760-13151457   | 9.724236667 | 10.54730333 |
| 4930578I06Rik | chr14:64589958-64606617   | 9.721623333 | 1.399356667 |
| Mapkapk3      | chr9:107157257-107192208  | 9.720903333 | 16.8926     |
| Cdca4         | chr12:114058445-114067600 | 9.714446667 | 6.31565     |
| Diexf         | chr1:194930596-194956445  | 9.714193333 | 3.90227     |
| 1110054O05Rik | chr4:59782518-59796727    | 9.71143     | 7.103816667 |
| Rfwd3         | chr8:113794843-113824122  | 9.708946667 | 10.93170667 |
| Gpn1          | chr5:31797133-31814000    | 9.708866667 | 4.942296667 |
| Ddx49         | chr8:72816764-72826351    | 9.70622     | 4.494433333 |
| Wdr53         | chr16:32247312-32257169   | 9.7054      | 3.871117333 |
| Timm50        | chr7:29090844-29097065    | 9.704876667 | 15.94572667 |
| 2410004P03Rik | chr12:17011763-17018533   | 9.704616667 | 2.235531333 |
| Dynlt1f       | chr17:6600795-6610127     | 9.703793333 | 12.34228    |
| Ints9         | chr14:65568881-65658672   | 9.700843333 | 9.103016667 |
| Usp5          | chr6:124765036-124779465  | 9.69996     | 18.8969     |
| Ndor1         | chr2:25100332-25110934    | 9.699883333 | 11.27157667 |
| Ddx56         | chr11:6157547-6167732     | 9.696946667 | 4.414366667 |
| Mttp          | chr3:137752818-137806352  | 9.695986667 | 1.565916333 |
| Lrp5          | chr19:3584824-3686564     | 9.695673333 | 10.32179333 |
| Pcyt2         | chr11:120471400-120479204 | 9.68877     | 10.24365667 |
| Slc16a2       | chrX:100892752-101017327  | 9.686333333 | 4.959678667 |
| Snip1         | chr4:124743936-124751287  | 9.68412     | 4.840526667 |
| Phf13         | chr4:151363739-151370288  | 9.68346     | 15.06415333 |
| Twf2          | chr9:106105438-106117718  | 9.683446667 | 6.923763333 |
| Kif3c         | chr12:3365131-3406494     | 9.681466667 | 7.761313333 |
| Dhx29         | chr13:113718000-113759395 | 9.678776667 | 7.774876667 |
| BC021767      | chr3:94464510-94471074    | 9.676696667 | 6.30935     |
| Srr           | chr11:74719860-74739300   | 9.67579     | 5.90934     |
| Nmt1          | chr11:102889875-102927419 | 9.674423333 | 13.63784667 |
| 1810030N24Rik | chr4:34715920-34725586    | 9.668973333 | 1.555081333 |
| Tmem218       | chr9:37015917-37030796    | 9.665346667 | 4.247256667 |
| Stard3        | chr11:98219681-98242426   | 9.662943333 | 14.08701667 |
| Pef1          | chr4:129784799-129805378  | 9.658726667 | 11.02538333 |
| Trit1         | chr4:122693839-122732177  | 9.656523333 | 17.27983333 |
| Nat6          | chr9:107482500-107486379  | 9.655003333 | 14.01700333 |
| Gm16197       | chr17:29194418-29215906   | 9.654866667 | 7.772193333 |
| Zfp760        | chr17:21844707-21862603   | 9.650676667 | 10.30213667 |
| Clcn7         | chr17:25270338-25299044   | 9.650643333 | 8.176883333 |
| Npepl1        | chr2:173935851-173948203  | 9.650246667 | 19.5243     |
| Ppcdc         | chr9:57260470-57287921    | 9.647623333 | 7.521856667 |

|               |                           |             |             |
|---------------|---------------------------|-------------|-------------|
| Fzd3          | chr14:65811277-65881300   | 9.647313333 | 21.9576     |
| Dnajc10       | chr2:80155622-80194212    | 9.641586667 | 15.27997667 |
| Fam117b       | chr1:59969849-60042190    | 9.64057     | 16.61206667 |
| Gm15760       | chr16:20545184-20548629   | 9.638803333 | 4.079256667 |
| Ranbp6        | chr19:29882597-29887464   | 9.631816667 | 16.08969667 |
| Fundc2        | chrX:72627737-72642497    | 9.630523333 | 15.09916667 |
| Pes1          | chr11:3863977-3880007     | 9.629313333 | 6.83224     |
| Rptn          | chr3:93197620-93203364    | 9.62609     | 62.044      |
| Siva1         | chr12:113883038-113887363 | 9.62536     | 3.135596667 |
| Foxq1         | chr13:31650038-31652843   | 9.625076667 | 8.34746     |
| Zfp113        | chr5:138580929-138596972  | 9.623906667 | 6.44997     |
| Z310034G01Rik | chr19:46422690-46423478   | 9.623561    | 1.067753667 |
| Zfp167        | chr9:122797588-122805242  | 9.623113333 | 5.783343333 |
| Ccdc21        | chr4:133685772-133743000  | 9.621316667 | 10.23539333 |
| Wdfy1         | chr1:79698836-79758344    | 9.61644     | 20.93003333 |
| 2010107G23Rik | chr10:61570403-61573761   | 9.61187     | 4.819316667 |
| Map2k2        | chr10:80568691-80587442   | 9.608953333 | 21.23668333 |
| Rxfp4         | chr3:88455819-88457064    | 9.60872     | 10.89100667 |
| 1110046J04Rik | chr13:34027900-34052050   | 9.605933333 | 2.531283333 |
| Snhg9         | chr17:24856475-24856910   | 9.605056667 | 18.63303333 |
| Oas1b         | chr5:121262643-121274169  | 9.602123333 | 0.688662367 |
| Phlpp1        | chr1:108068445-108290822  | 9.59947     | 12.49926667 |
| Slc39a10      | chr1:46864388-46910354    | 9.59852     | 19.72189333 |
| Fasn          | chr11:120667271-120685861 | 9.594723333 | 28.73986667 |
| 0610030E20Rik | chr6:72297310-72303154    | 9.59322     | 8.910223333 |
| Dhdds         | chr4:133524971-133556779  | 9.589513333 | 7.244443333 |
| Casp9         | chr4:141349526-141371890  | 9.588393333 | 11.08496333 |
| Erap1         | chr13:74777319-74829323   | 9.587783333 | 6.553773333 |
| 1810043H04Rik | chr11:119960247-119961738 | 9.58687     | 33.50086667 |
| Shc1          | chr3:89222472-89233951    | 9.57951     | 18.59037    |
| Slc25a13      | chr6:5991217-6167173      | 9.578243333 | 7.450193333 |
| D19Ertd386e   | chr19:42593294-42666746   | 9.57791     | 13.62763333 |
| Slc48a1       | chr15:97614795-97623123   | 9.575476667 | 19.55828    |
| Ttc17         | chr2:94140922-94246846    | 9.569583333 | 10.91207667 |
| Bace1         | chr9:45646611-45670567    | 9.565053333 | 8.505873333 |
| Tmprss11e     | chr5:87134210-87174832    | 9.563643333 | 1.818333667 |
| Cplx2         | chr13:54472712-54485278   | 9.560353333 | 11.58771    |
| Myo9b         | chr8:73796612-73884611    | 9.558876667 | 14.294      |
| A230072C01Rik | chrX:20538801-20564475    | 9.558213333 | 3.552585    |
| Cenpa         | chr5:30969274-30977199    | 9.55408     | 12.92949667 |
| Nif3l1        | chr1:58504476-58519120    | 9.551666667 | 9.2173      |
| Ehd4          | chr2:119915222-119980311  | 9.550846667 | 10.36385    |
| Dmbt1         | chr7:138175589-138265142  | 9.547759667 | 79.02683113 |
| Ddb2          | chr2:91051738-91077223    | 9.54562     | 7.518623333 |
| 2210408I21Rik | chr13:77274796-77752940   | 9.541093333 | 6.318056667 |
| Tgoln2        | chr6:72560950-72566742    | 9.52710213  | 0.060484649 |
| Pla2g6        | chr15:79116657-79158801   | 9.526923333 | 3.241811    |
| Anapc7        | chr5:122872452-122894920  | 9.523086667 | 11.08946667 |
| Txndc5        | chr13:38592143-38620329   | 9.522163333 | 9.195186667 |
| Ttc39b        | chr4:82866204-82970093    | 9.51853     | 10.84920667 |
| Wdr46         | chr17:34077667-34086640   | 9.514046667 | 9.775756667 |
| Sowahc        | chr10:58684669-58689181   | 9.509333333 | 8.96129     |



|               |                           |             |             |
|---------------|---------------------------|-------------|-------------|
| Arap2         | chr5:62993684-63157416    | 9.50804     | 9.427896667 |
| Murc          | chr4:48676385-48686364    | 9.50336     | 9.89338     |
| 9030025P20Rik | chr17:15115827-15128541   | 9.501993333 | 6.90385     |
| Krtap3-3      | chr11:99411445-99412177   | 9.497663333 | 14.67002667 |
| Aldh9a1       | chr1:169280121-169298661  | 9.49562     | 8.451256667 |
| Nub1          | chr5:24191632-24216373    | 9.49529     | 7.964606667 |
| Zkscan14      | chr5:145955814-145962751  | 9.495006667 | 2.951486667 |
| Rgp1          | chr4:43591606-43600359    | 9.4939      | 12.89473333 |
| Cyb5d1        | chr11:69207113-69208848   | 9.488006667 | 11.26182667 |
| Mrs2          | chr13:25084351-25112248   | 9.48113     | 13.02344333 |
| Fam190a       | chr6:61130318-62332857    | 9.47453     | 1.797899333 |
| Tbc1d17       | chr7:52096145-52104449    | 9.473093333 | 7.227563333 |
| Thsd4         | chr9:59814737-60358842    | 9.469923333 | 13.17162667 |
| 4921536K21Rik | chr11:3786090-3795129     | 9.46976     | 1.465853333 |
| Dcp2          | chr18:44540153-44584623   | 9.458856667 | 8.32868     |
| 2410017P09Rik | chr12:4234026-4240123     | 9.458653333 | 7.103523333 |
| Polr2d        | chr18:31948812-31956355   | 9.45831     | 5.425733333 |
| Rbp7          | chr4:148823810-148829077  | 9.454163333 | 27.55899    |
| Zfp931        | chr2:177801582-177813130  | 9.453553333 | 8.589796    |
| Tmem8         | chr17:26250260-26260198   | 9.452846667 | 5.873993333 |
| Akap10        | chr11:61684808-61743728   | 9.451176667 | 6.22944     |
| Tiam1         | chr16:89787355-89974944   | 9.447083333 | 18.21366667 |
| Tarbp2        | chr15:102348622-102354107 | 9.443593333 | 8.057463333 |
| Tanc1         | chr2:59450100-59684206    | 9.440183333 | 18.51916667 |
| Med25         | chr7:52134755-52147736    | 9.440076667 | 7.302166667 |
| Lrrc49        | chr9:60435043-60535941    | 9.42665     | 9.206876667 |
| Htt           | chr5:35104388-35255170    | 9.424976667 | 7.99603     |
| Spg11         | chr2:121879261-121944122  | 9.42493     | 8.499623333 |
| Ppm1l         | chr3:69120839-69359318    | 9.42238     | 6.624303333 |
| Rfx2          | chr17:56915319-56970431   | 9.418896667 | 10.93168    |
| Sntb1         | chr15:55470708-55738504   | 9.41866     | 7.049316667 |
| Cttnbp2       | chr6:18316476-18464825    | 9.41811     | 3.438586667 |
| 2410091C18Rik | chr17:79336474-79347392   | 9.41624     | 10.12361    |
| Adsl          | chr15:80778948-80799803   | 9.41242     | 9.65609     |
| Mrpl2         | chr17:46783196-46787081   | 9.410283333 | 18.49980333 |
| Pcdhb15       | chr18:37633199-37635994   | 9.408836667 | 3.41084     |
| Wfs1          | chr5:37357342-37380221    | 9.40878     | 19.07233667 |
| Cnp           | chr11:100436252-100443053 | 9.405833333 | 5.588806667 |
| Trmt61b       | chr17:71906366-71948101   | 9.405486667 | 11.42500667 |
| Nab2          | chr10:127097973-127103759 | 9.402023333 | 20.74263333 |
| Mmachc        | chr4:116375038-116380990  | 9.40106     | 12.38036433 |
| Ppip5k1       | chr2:121136296-121176749  | 9.39828     | 11.18393    |
| Zfp458        | chr13:67355853-67370004   | 9.395176667 | 10.81489333 |
| Dpp9          | chr17:56326104-56358312   | 9.389713333 | 17.72907    |
| Hdac7         | chr15:97623094-97674933   | 9.389283333 | 9.25026     |
| Csf2ra        | chr19:61300304-61304321   | 9.38872     | 10.994151   |
| Gstm4         | chr3:107843325-107847777  | 9.38857     | 9.665233333 |
| Slc19a2       | chr1:166179185-166195499  | 9.388416667 | 6.24801     |
| Wdpcp         | chr11:21472283-21798689   | 9.387146667 | 7.70287     |
| Bcl7a         | chr5:123794456-123824092  | 9.37025     | 10.40649333 |
| Taf7          | chr18:37800144-37803858   | 9.369686667 | 8.030533333 |
| Adam9         | chr8:26060082-26127394    | 9.36967     | 9.487063333 |

|               |                           |             |             |
|---------------|---------------------------|-------------|-------------|
| Cmtm3         | chr8:106864493-106871572  | 9.367593333 | 2.194263333 |
| Sox13         | chr1:135278876-135320789  | 9.3657      | 14.87213333 |
| Ptpn1         | chr2:167757826-167804885  | 9.365396667 | 12.07692    |
| Btf3l4        | chr4:108486899-108506189  | 9.363803333 | 14.09174    |
| BC046404      | chr11:62418385-62462025   | 9.363803333 | 6.74839     |
| Arhgef18      | chr8:3393007-3456600      | 9.362073333 | 8.538273333 |
| Rnls          | chr19:33212234-33466785   | 9.35893     | 5.392263333 |
| Hdgfrp3       | chr7:89026141-89079345    | 9.357846667 | 6.947333333 |
| Diap2         | chrX:126284277-127000369  | 9.354513333 | 13.54319    |
| Dut           | chr2:125072983-125084785  | 9.354083333 | 6.16705     |
| Rrp1b         | chr17:32173106-32199807   | 9.353293333 | 7.72872     |
| Crbn          | chr6:106728238-106750068  | 9.352023333 | 9.528486667 |
| Ncdn          | chr4:126420993-126430673  | 9.349316667 | 8.474153333 |
| 2900002K06Rik | chrX:7722552-7725089      | 9.347476667 | 6.79168     |
| Prps2         | chrX:163784264-163820631  | 9.34664     | 10.41380333 |
| Med17         | chr9:15064794-15084311    | 9.345193333 | 8.49387     |
| Prep          | chr10:44787019-44878801   | 9.34301     | 19.67866333 |
| H2-DMa        | chr17:34272615-34275480   | 9.342789667 | 2.221173333 |
| Gm14322       | chr2:177493992-177507980  | 9.34241     | 1.91317     |
| Fam13c        | chr10:69903415-70021480   | 9.33585     | 2.217166667 |
| Dnaja4        | chr9:54547365-54564124    | 9.330733333 | 28.3271     |
| Endog         | chr2:30027043-30029589    | 9.32935     | 2.256496933 |
| Crnn          | chr3:92948708-92953393    | 9.326516667 | 12.02807667 |
| Wdr55         | chr18:36919892-36923362   | 9.326016667 | 8.24471     |
| Ncaph2        | chr15:89186152-89203259   | 9.323703333 | 6.121396667 |
| Cpne5         | chr17:29293465-29374735   | 9.321713333 | 2.242473333 |
| Snx33         | chr9:56765006-56776178    | 9.31868     | 6.75818     |
| Rsl1          | chr13:67274117-67284434   | 9.308853333 | 2.3627      |
| Prpsap2       | chr11:61543151-61575590   | 9.30562     | 7.664153333 |
| 0610040J01Rik | chr5:64203733-64290858    | 9.30083     | 11.93727333 |
| Dhx38         | chr8:112071923-112089501  | 9.300413333 | 7.490773333 |
| Endod1        | chr9:14158433-14185686    | 9.29897     | 12.4508     |
| Trex1         | chr9:108960445-108962237  | 9.298393333 | 9.908513333 |
| Slc16a13      | chr11:70030293-70034496   | 9.298146667 | 4.956573333 |
| Gm11517       | chr11:96656645-96659470   | 9.29627     | 1.449181    |
| Lsm10         | chr4:125773896-125775828  | 9.293056667 | 15.1347     |
| Krt83         | chr15:101261920-101269235 | 9.29012     | 16.39643333 |
| Prkca         | chr11:107794700-108205202 | 9.289766667 | 4.930173333 |
| lpo11         | chr13:107584518-107726995 | 9.288443333 | 8.465693333 |
| Fam175b       | chr7:140050907-140076797  | 9.28628     | 10.95206333 |
| Syt11         | chr3:88548622-88576521    | 9.285866667 | 12.98697333 |
| Areg          | chr5:91568640-91577458    | 9.278393333 | 7.581613333 |
| Alg13         | chrX:140752508-140808991  | 9.277873333 | 9.66903     |
| Xrcc1         | chr7:25332168-25358457    | 9.274486667 | 14.15426667 |
| Nsun2         | chr13:69750894-69774657   | 9.272603333 | 10.71842667 |
| Prkdc         | chr16:15637958-15842332   | 9.269406667 | 9.12088     |
| Srxn1         | chr2:151931465-151937089  | 9.266666667 | 6.06871     |
| Parg          | chr14:33015156-33110735   | 9.266116667 | 12.42962333 |
| Cnot6         | chr11:49488211-49526212   | 9.26485     | 24.5644     |
| Odz4          | chr7:103359146-104057064  | 9.263       | 13.79973333 |
| Gpank1        | chr17:35258440-35261760   | 9.261526667 | 5.184576667 |
| Pak6          | chr2:118489312-118523756  | 9.257606667 | 16.70956667 |

|               |                           |             |             |
|---------------|---------------------------|-------------|-------------|
| 4921531C22Rik | chr2:179711557-179713718  | 9.253796667 | 3.367971    |
| Med12         | chrX:98469429-98494273    | 9.247473333 | 14.14447    |
| Mrto4         | chr4:138903359-138908213  | 9.246683333 | 15.8352     |
| Agrn          | chr4:155539398-155571597  | 9.244086667 | 16.1682     |
| 1700108F19Rik | chr14:77077374-77086915   | 9.242436667 | 1.825313333 |
| Dcun1d4       | chr5:73872293-73952033    | 9.24102     | 19.53536667 |
| Adh1          | chr3:137940608-137953655  | 9.240433333 | 23.30785133 |
| Klh11         | chr11:100323925-100334096 | 9.23785     | 8.805056667 |
| Slc25a27      | chr17:43778848-43803964   | 9.23638     | 11.21683667 |
| Jakmip1       | chr5:37442095-37516537    | 9.230916667 | 19.5603     |
| Ccdc163       | chr4:116381534-116387709  | 9.229036667 | 11.99591333 |
| Bcl2l1        | chr2:152606403-152657418  | 9.22772     | 28.11026667 |
| Fam174a       | chr1:97210204-97231861    | 9.22744     | 15.62285667 |
| Irgm2         | chr11:58028478-58036285   | 9.226003333 | 5.424       |
| 4921524J17Rik | chr8:87932657-87956740    | 9.224516667 | 4.283769333 |
| Slc35a1       | chr4:34610505-34634687    | 9.223253333 | 10.30818    |
| Fbxo18        | chr2:11664199-11699154    | 9.222376667 | 12.57811    |
| Tsga10        | chr1:37811620-37921924    | 9.218236667 | 8.46037     |
| Stambpl1      | chr19:34266759-34314818   | 9.21796     | 9.862916667 |
| Pdgfra        | chr5:75548315-75594229    | 9.213103333 | 9.652766667 |
| Nudt2         | chr4:41412180-41427959    | 9.208126667 | 5.877956667 |
| Tmem161a      | chr8:72696309-72707562    | 9.206946667 | 17.0908     |
| Nup160        | chr2:90517371-90576485    | 9.201026667 | 6.24011     |
| Osgep         | chr14:51535048-51544568   | 9.200903333 | 10.64423333 |
| Rngtt         | chr4:33397285-33589585    | 9.20005     | 7.68883     |
| Spink5        | chr18:44122894-44182141   | 9.19987     | 36.51806667 |
| Klc3          | chr7:19979788-19985205    | 9.196916667 | 9.881953333 |
| Tsen54        | chr11:115676052-115684416 | 9.19349     | 5.108193333 |
| 4931406P16Rik | chr7:35021732-35070628    | 9.192333333 | 10.12271667 |
| Cep170        | chr1:178663783-178737255  | 9.191453333 | 10.10391333 |
| Rrnad1        | chr3:87726522-87734117    | 9.1912      | 8.142453333 |
| Palmd         | chr3:116621179-116671870  | 9.189       | 12.77501333 |
| Irak2         | chr6:113588460-113645020  | 9.186923333 | 8.918143333 |
| Gm14391       | chr2:175010665-175032425  | 9.183483333 | 4.147663333 |
| Cntd1         | chr11:101140516-101150015 | 9.179056667 | 5.640563333 |
| Klh129        | chr12:5084273-5382488     | 9.17757     | 2.516689333 |
| 1200011M11Rik | chr11:86891233-86900279   | 9.17752     | 6.021126667 |
| Plekhb1       | chr7:107792409-107810908  | 9.17341     | 14.78953333 |
| Pi4k2b        | chr5:53132812-53160579    | 9.16868     | 9.39146     |
| St7l          | chr3:104667423-104732981  | 9.16852     | 8.527353333 |
| Agap3         | chr5:23957994-24007865    | 9.165616667 | 13.0113     |
| Git2          | chr5:115177416-115223501  | 9.158866667 | 5.088036667 |
| Eil           | chr8:73063573-73116757    | 9.15702     | 8.328613333 |
| Tapbpl        | chr6:125174229-125181878  | 9.156063333 | 8.062906667 |
| Ppp1r12c      | chr7:4433122-4453282      | 9.154163333 | 8.239616667 |
| Ranbp3        | chr17:56812647-56851192   | 9.153786667 | 9.710776667 |
| Trim11        | chr11:58791617-58804960   | 9.14668     | 5.68795     |
| A230001M10Rik | chr3:102066327-102092694  | 9.14309     | 0           |
| R3hcc1        | chr14:70097110-70107387   | 9.141813333 | 24.72908    |
| Mtag2         | chr7:52621532-52623318    | 9.139843333 | 2.046603333 |
| Hist1h2ac     | chr13:23773335-23775828   | 9.13893     | 1.520583    |
| Alg12         | chr15:88635672-88649748   | 9.13498     | 4.748246667 |

|               |                           |             |             |
|---------------|---------------------------|-------------|-------------|
| Slc1a2        | chr2:102498839-102630941  | 9.132226667 | 6.638383333 |
| Gm14391       | chr2:175868369-175987706  | 9.132173333 | 4.29887     |
| Fam174b       | chr7:80885192-80921805    | 9.13154     | 21.20486667 |
| Snhg10        | chr12:106268826-106270489 | 9.129116667 | 4.31262     |
| Zfp182        | chrX:20603309-20639164    | 9.129063333 | 9.539623333 |
| Polr3g        | chr13:81812835-81850012   | 9.127826667 | 14.98640333 |
| Parn          | chr16:13538056-13668263   | 9.126383333 | 18.58439    |
| Agr2          | chr12:36719511-36730668   | 9.124976667 | 12.95182    |
| 4933413L06Rik | chr13:118495570-118508818 | 9.12242     | 3.906986667 |
| Krtcap3       | chr5:31554078-31555570    | 9.121436667 | 12.94784333 |
| Trappc2l      | chr8:125135525-125139491  | 9.117506667 | 23.35711667 |
| Nhsl2         | chrX:99044723-99287394    | 9.112606667 | 4.052143333 |
| Celf2         | chr2:6460743-7317825      | 9.112216667 | 13.04018    |
| Prkg1         | chr19:30638976-31839523   | 9.109826667 | 0.384260667 |
| Nucb2         | chr7:123647887-123684102  | 9.108663333 | 12.13440333 |
| Zbtb2         | chr10:5958432-5979467     | 9.108603333 | 12.64433333 |
| Apbb3         | chr18:36830812-36839020   | 9.10832     | 13.36595333 |
| Klc4          | chr17:46767579-46782093   | 9.107643333 | 11.10595667 |
| 2010111I01Rik | chr13:63116293-63400964   | 9.107313333 | 21.94406667 |
| D2hgdh        | chr1:95721816-95748751    | 9.09482     | 8.493643333 |
| Lcor          | chr19:41624128-41634271   | 9.094263333 | 9.2016      |
| Atcay         | chr10:80667257-80693524   | 9.091903333 | 11.45085667 |
| Zmym3         | chrX:98599722-98616024    | 9.08866     | 10.97105    |
| Tm9sf1        | chr14:56254802-56262643   | 9.08838     | 31.1761     |
| Sf3a1         | chr11:4060356-4082544     | 9.08532     | 14.0352     |
| lkbkg         | chrX:71638629-71699117    | 9.08256     | 10.41216    |
| Gga3          | chr11:115445568-115465230 | 9.082386667 | 6.677513333 |
| Dnalc4        | chr15:79591878-79604897   | 9.080566667 | 23.69043333 |
| Clip4         | chr17:72119030-72207691   | 9.079516667 | 18.84046667 |
| Pcdh19        | chrX:130117399-130223532  | 9.078556667 | 14.02856667 |
| Tmtc4         | chr14:123318196-123382483 | 9.076813333 | 21.86876667 |
| Agxt2l2       | chr11:51398258-51416771   | 9.076373333 | 10.69371333 |
| Pigv          | chr4:133217339-133228562  | 9.075086667 | 6.542556667 |
| C1d           | chr11:17157620-17169179   | 9.071256667 | 5.62903     |
| Map3k1        | chr13:112536642-112599191 | 9.0686      | 17.06516667 |
| Ube2ql1       | chr13:69841709-69878775   | 9.068396667 | 0           |
| Ptplb         | chr16:35022506-35109261   | 9.06812     | 18.59990667 |
| Trmt6         | chr2:132629950-132641790  | 9.065856667 | 12.43877333 |
| Tmem167       | chr13:90229271-90254526   | 9.065426667 | 5.942903333 |
| ltgb7         | chr15:102046425-102062366 | 9.058093333 | 5.55873     |
| Tcea2         | chr2:181415014-181422756  | 9.056256667 | 3.183636667 |
| Zfp317        | chr9:19426534-19454175    | 9.055583333 | 7.2446      |
| Klf11         | chr12:25336235-25347647   | 9.054243333 | 12.76512    |
| Zdhhc16       | chr19:42007961-42018593   | 9.053226667 | 16.05284667 |
| Rnf121        | chr7:109168385-109213646  | 9.046373333 | 4.66919     |
| Rg9mtd2       | chr3:137806501-137822784  | 9.042963333 | 12.32584333 |
| Vamp1         | chr6:125165598-125172324  | 9.042133333 | 6.16309     |
| Tax1bp3       | chr11:72990584-72995548   | 9.038083333 | 14.65032333 |
| Tmem129       | chr5:33995864-34000481    | 9.037056667 | 10.70293333 |
| Hist1h2ba     | chr13:24025641-24026025   | 9.02379     | 11.07248    |
| Galc          | chr12:99440509-99497547   | 9.01684     | 9.954303333 |
| 2310067B10Rik | chr11:115626746-115660347 | 9.01562     | 10.78248667 |

|               |                           |             |             |
|---------------|---------------------------|-------------|-------------|
| Cdkn2aip      | chr8:48794697-48799285    | 9.00857     | 11.64569667 |
| Adal          | chr2:120967876-120982414  | 9.007676667 | 8.467053333 |
| Heatr5b       | chr17:79152245-79234721   | 9.003226667 | 13.02058    |
| Mcat          | chr15:83377226-83386141   | 9.00046     | 6.255173333 |
| Rbms2         | chr10:127566525-127617353 | 8.999336667 | 10.23023667 |
| Hebp2         | chr10:18259928-18265882   | 8.998156667 | 7.245573333 |
| Rbm15         | chr3:107129027-107136207  | 8.99155     | 7.836296667 |
| lpp           | chr4:116180153-116210840  | 8.991376667 | 7.763696667 |
| Sc1t1         | chr3:41430626-41546436    | 8.99029     | 4.812063333 |
| Smpd4         | chr16:17619446-17644923   | 8.988933333 | 9.01017     |
| BC026590      | chr4:56815200-56822477    | 8.987146667 | 8.091893333 |
| Paip1         | chr13:120217406-120249127 | 8.984663333 | 10.69812    |
| Cds2          | chr2:132088992-132137777  | 8.976943333 | 11.87646667 |
| Atg2a         | chr19:6241667-6262304     | 8.975433333 | 10.79022333 |
| Haus1         | chr18:77996305-78006519   | 8.969763333 | 15.41371    |
| Dsty1         | chr1:134314029-134363536  | 8.96735     | 12.03220667 |
| 4933426D04Rik | chr5:24408386-24412667    | 8.964956667 | 1.732911667 |
| Rnf40         | chr7:134732211-134747119  | 8.964243333 | 7.277733333 |
| Pex13         | chr11:23546478-23565935   | 8.962563333 | 9.80327     |
| Zdhhc7        | chr8:122604994-122625372  | 8.961683333 | 10.45549667 |
| lqce          | chr5:141139458-141178332  | 8.961563333 | 7.93835     |
| 2700094K13Rik | chr2:84509377-84510865    | 8.955503333 | 10.14591    |
| C030046E11Rik | chr19:29596771-29680411   | 8.954333333 | 5.099706667 |
| Ctif          | chr18:75590870-75857350   | 8.9529      | 15.7515     |
| Dync2li1      | chr17:85025838-85054904   | 8.949146667 | 7.012594    |
| Wdr44         | chrX:23270242-23383127    | 8.949036667 | 8.058636667 |
| Casp8ap2      | chr4:32702447-32740240    | 8.94402     | 9.362873333 |
| 2310003L22Rik | chr2:139996381-140030988  | 8.943366667 | 8.591553333 |
| Atg4b         | chr1:95651609-95686106    | 8.942286667 | 8.012426667 |
| 6430548G04    | chr2:27000417-27018223    | 8.94224     | 1.605964667 |
| Zfp952        | chr17:33130083-33142402   | 8.941893333 | 10.14861333 |
| Wdr6          | chr9:108474643-108481001  | 8.938756667 | 21.31243333 |
| Synj2bp       | chr12:82593180-82633894   | 8.936323333 | 8.562423333 |
| Grpel1        | chr5:36807833-36816726    | 8.93601     | 7.322648433 |
| Tmem158       | chr9:123168174-123169907  | 8.93563     | 19.39437    |
| Khyn1         | chr14:56503805-56515618   | 8.935446667 | 3.415033333 |
| Atxn7l3       | chr11:102150613-102157943 | 8.93439     | 3.78411     |
| Snrnp25       | chr11:32105414-32108995   | 8.932813333 | 19.97786667 |
| Adipor2       | chr6:119303167-119367501  | 8.931193333 | 14.32943333 |
| 2610524H06Rik | chr5:115271945-115273477  | 8.93046     | 29.04192333 |
| Btbd6         | chr12:114214692-114217151 | 8.92842     | 9.866693333 |
| D430036J16Rik | chr9:81525536-81538763    | 8.92407     | 1.5835524   |
| Fam196b       | chr11:34214821-34322640   | 8.92146     | 1.802486667 |
| Aldh3b2       | chr19:3972327-3981665     | 8.9193      | 25.68566667 |
| Ccdc40        | chr11:119089885-119126526 | 8.915786667 | 4.7657      |
| Xpc           | chr6:91439301-91465882    | 8.910423333 | 9.675796667 |
| BC048355      | chr17:46633737-46636567   | 8.909983333 | 5.39816     |
| Gramd1a       | chr7:31915145-31936069    | 8.908546667 | 13.3183     |
| Nosip         | chr7:52317798-52333873    | 8.90793     | 8.505746667 |
| Pacsin3       | chr2:91096969-91104836    | 8.90354     | 14.29035667 |
| Grhpr         | chr4:44994282-45003568    | 8.901946667 | 15.77379667 |
| Mospd2        | chrX:161376140-161418267  | 8.901376667 | 9.669193333 |

|               |                           |             |             |
|---------------|---------------------------|-------------|-------------|
| Fuz           | chr7:52151448-52155994    | 8.900823333 | 6.227956667 |
| Dpysl3        | chr18:43483880-43552985   | 8.89907     | 7.67366     |
| 1810034E14Rik | chr13:64350007-64369453   | 8.897365333 | 2.989606667 |
| Rad17         | chr13:101387118-101421014 | 8.896713333 | 4.745833333 |
| Hyal3         | chr9:107483626-107489690  | 8.89641     | 0.880323333 |
| Irs2          | chr8:10986963-11008430    | 8.895343333 | 3.464446667 |
| Smoc2         | chr17:14416512-14541797   | 8.894403333 | 3.45669     |
| D030056L22Rik | chr19:18787725-18792918   | 8.89131     | 5.558023333 |
| Pkd2          | chr5:104888475-104934838  | 8.889016667 | 10.44769    |
| Gcc1          | chr6:28366602-28371724    | 8.88809     | 17.07943333 |
| Trim56        | chr5:137587155-137592077  | 8.88708     | 4.341456667 |
| Tex10         | chr4:48443827-48486294    | 8.88702     | 12.87206667 |
| Agpat6        | chr8:24283417-24318925    | 8.873823333 | 6.45765     |
| Slc28a3       | chr13:58654668-58712238   | 8.872666667 | 6.608676667 |
| Mcrs1         | chr15:99073247-99082392   | 8.86915     | 2.73577     |
| Aprt          | chr8:125098536-125100807  | 8.86903     | 21.50713333 |
| Tmem102       | chr11:69617096-69619126   | 8.865933333 | 11.74707    |
| Plrg1         | chr3:82859459-82876213    | 8.863406667 | 18.23417667 |
| Sfpi1         | chr2:90936953-90955913    | 8.86294     | 1.670636667 |
| F8a           | chrX:70473644-70476134    | 8.862693333 | 3.97171     |
| Tmem109       | chr19:10945151-10956233   | 8.861603333 | 16.09683333 |
| Fbxo33        | chr12:60301641-60320470   | 8.856793333 | 10.23316367 |
| Ergic2        | chr6:148127839-148160896  | 8.85274     | 11.47711    |
| Fgd2          | chr17:29497858-29516480   | 8.851526667 | 4.813773333 |
| Slc16a3       | chr11:120809797-120820314 | 8.851076667 | 3.108936667 |
| 4933417E11Rik | chr1:72005571-72051769    | 8.849946667 | 7.913054667 |
| Zfp161        | chr17:69733317-69739884   | 8.846306667 | 12.69522333 |
| Ccnd3         | chr17:47641999-47736637   | 8.843573333 | 19.59241333 |
| Otud3         | chr4:138451293-138469862  | 8.842743333 | 6.512253333 |
| Donson        | chr16:91679509-91688973   | 8.840636667 | 9.445173333 |
| Ttyh3         | chr5:141096531-141124985  | 8.839703333 | 23.85123333 |
| Wdr3          | chr3:99942102-99966326    | 8.836143333 | 11.56301333 |
| Pdcd10        | chr3:75320411-75360721    | 8.833183333 | 16.14133333 |
| Trim21        | chr7:109706435-109713983  | 8.827356667 | 4.119758333 |
| Ebp           | chrX:7762456-7770638      | 8.82682     | 21.17715333 |
| Msl3          | chrX:165092049-165111834  | 8.82561     | 4.787516667 |
| Fntb          | chr12:77938453-78022399   | 8.824753333 | 6.511       |
| Vsig10        | chr5:117769274-117805015  | 8.824286667 | 8.69369     |
| Kdm5d         | chrY:234230-280254        | 8.822393667 | 11.00958    |
| Stx6          | chr1:157005832-157050647  | 8.81745     | 9.0159      |
| Lipa          | chr19:34566805-34601964   | 8.815376667 | 14.50524667 |
| Ccdc71        | chr9:108362848-108368276  | 8.81418     | 19.62442    |
| Lnx2          | chr5:147828230-147888148  | 8.81381     | 5.442853333 |
| Extl3         | chr14:65670895-65716943   | 8.808043333 | 10.28391667 |
| Kdm2b         | chr5:123320684-123439101  | 8.806936667 | 11.67352667 |
| 1300001I01Rik | chr11:74462996-74484349   | 8.802533333 | 15.39723333 |
| Ublcp1        | chr11:44268072-44284050   | 8.79882     | 12.87472667 |
| B230118H07Rik | chr2:101400937-101469143  | 8.797016667 | 9.22647     |
| Gna14         | chr19:16510156-16685308   | 8.794836667 | 108.0714667 |
| Slc35b4       | chr6:34105878-34127054    | 8.791863333 | 7.124356667 |
| Tstd2         | chr4:46127618-46151347    | 8.791173333 | 9.14963     |
| Mta1          | chr12:114336488-114375417 | 8.790186667 | 14.04936667 |

|               |                           |             |             |
|---------------|---------------------------|-------------|-------------|
| Alox12e       | chr11:70129114-70136020   | 8.789876667 | 7.29123     |
| Krt1          | chr15:101675856-101681217 | 8.785686667 | 3.076083333 |
| Naa40         | chr19:7300157-7315712     | 8.782703333 | 9.698746667 |
| Fbxo36        | chr1:84836415-84897061    | 8.782123333 | 9.329156667 |
| Tmprss11d     | chr5:86731878-86802412    | 8.777566667 | 17.40565    |
| Krt222        | chr11:99094411-99105381   | 8.77706     | 6.357606667 |
| Arhgap24      | chr5:102910409-103326956  | 8.776213333 | 3.469843333 |
| Nt5dc3        | chr10:86241749-86301134   | 8.775276667 | 7.87841     |
| Ntn4          | chr10:93103793-93208717   | 8.774376667 | 10.77387333 |
| Ctnnbip1      | chr4:148892349-148940546  | 8.77198     | 15.26308333 |
| Deaf1         | chr7:148483074-148524682  | 8.771756667 | 6.486643667 |
| Scyl3         | chr1:165860194-165885257  | 8.77017     | 6.878476667 |
| Rhou          | chr8:126177828-126187780  | 8.768773333 | 12.55784333 |
| Srgap2        | chr1:133181827-133423938  | 8.766186667 | 6.2291      |
| Klhl2         | chr8:67218658-67373716    | 8.764443333 | 10.53687333 |
| Lmo1          | chr7:116282085-116313822  | 8.763593333 | 4.718666667 |
| Nenf          | chr1:193130675-193141997  | 8.76022     | 14.78683333 |
| Mrps30        | chr13:119168916-119176059 | 8.759106667 | 3.655005667 |
| Map3k2        | chr18:32322742-32396405   | 8.759033333 | 7.985103333 |
| Pcdhgc3       | chr18:37966063-38001526   | 8.75233     | 11.25223667 |
| Ptprh         | chr7:4500215-4555643      | 8.751183333 | 1.281019667 |
| Mms19         | chr19:42018196-42055626   | 8.750453333 | 8.8048      |
| Rnf185        | chr11:3315985-3352328     | 8.747273333 | 3.352267333 |
| Eif4e2        | chr1:89110488-89137063    | 8.743806667 | 20.1373     |
| Pign          | chr1:107414998-107560253  | 8.743256667 | 8.913673333 |
| D1Bwg0212e    | chr1:39592646-39603722    | 8.74006     | 11.09281    |
| Cobl          | chr11:12136678-12364963   | 8.739023333 | 11.11633667 |
| Gm5801        | chr4:155320361-155331710  | 8.738726667 | 16.70243333 |
| 2200002D01Rik | chr7:30032539-30033486    | 8.73658     | 5.67612     |
| Stx18         | chr5:38430473-38528057    | 8.730323333 | 3.426516667 |
| Fbxl19        | chr7:134890288-134912442  | 8.724016667 | 8.30426     |
| Eef1e1        | chr13:38737559-38750897   | 8.723973333 | 15.7042     |
| Wdr45l        | chr11:121188516-121215761 | 8.721256667 | 10.61068667 |
| Mrps9         | chr1:42908077-42962528    | 8.720103333 | 12.14682333 |
| 1700001G17Rik | chr1:33726668-33727557    | 8.719920333 | 4.857536667 |
| Tmem209       | chr6:30431232-30459706    | 8.715866667 | 9.13988     |
| Cuedc2        | chr19:46404301-46413150   | 8.71446     | 5.269843333 |
| 2510009E07Rik | chr16:21649117-21694738   | 8.711696667 | 8.523656667 |
| Mdn1          | chr4:32744093-32862192    | 8.710863333 | 7.18188     |
| Svip          | chr7:59252530-59261388    | 8.70957     | 2.966902    |
| Chmp7         | chr14:70116785-70132377   | 8.708813333 | 16.12124333 |
| Gm3696        | chr14:7915538-7937971     | 8.708383333 | 5.87941     |
| Abhd3         | chr18:10644408-10706694   | 8.707423333 | 5.134363333 |
| Prpf19        | chr19:10969720-10984049   | 8.706836667 | 7.987263333 |
| Acvr2a        | chr2:48669628-48758784    | 8.703963333 | 13.67721    |
| Hdhd2         | chr18:77182853-77210910   | 8.703286667 | 7.11845     |
| Zfp865        | chr7:4971977-4984825      | 8.70316     | 8.890103333 |
| Socs5         | chr17:87507018-87536925   | 8.702213333 | 3.671923333 |
| Hddc3         | chr7:87488022-87490983    | 8.702156667 | 3.847962    |
| Zfp335        | chr2:164717391-164737250  | 8.70144     | 12.1961     |
| Tln1          | chr4:43544384-43575455    | 8.699846667 | 7.425376667 |
| Eml3          | chr19:9004183-9016072     | 8.697253333 | 15.09157    |

|               |                           |             |             |
|---------------|---------------------------|-------------|-------------|
| Plekha3       | chr2:76513371-76535392    | 8.69556     | 8.561156667 |
| 6030405A18Rik | chr3:54700990-54719809    | 8.692886667 | 16.3617     |
| Tnfrsf18      | chr4:155400450-155403000  | 8.69206     | 10.78143667 |
| Cul5          | chr9:53422686-53475612    | 8.691543333 | 13.8715     |
| 6330549D23Rik | chr3:96410584-96433742    | 8.68961     | 6.632236667 |
| Sugp2         | chr8:72758124-72787004    | 8.688743333 | 7.24802     |
| Nkap          | chrX:34666757-34690741    | 8.68744     | 11.3885     |
| Zfp511        | chr7:147222289-147226504  | 8.684193333 | 14.04853333 |
| 1700020O03Rik | chr12:87582827-87632318   | 8.682876667 | 9.73627     |
| Gnb5          | chr9:75159201-75193478    | 8.675443333 | 6.301316667 |
| 2610035D17Rik | chr11:112905219-113063152 | 8.67523     | 9.086836667 |
| Pomgnt1       | chr4:115823122-115832449  | 8.6737      | 8.850183333 |
| Pus3          | chr9:35367050-35374985    | 8.67231     | 11.46327    |
| Optn          | chr2:4941687-4984984      | 8.671916667 | 2.872846667 |
| Pthr1         | chr2:32631340-32633113    | 8.670903333 | 18.86745533 |
| Sgms1         | chr19:32197216-32462944   | 8.666683333 | 17.2618     |
| Cfl2          | chr12:55959805-55963864   | 8.664003333 | 8.345856667 |
| Dand5         | chr8:87339303-87356164    | 8.659296667 | 4.653573333 |
| 9130221H12Rik | chr7:26013741-26015283    | 8.656133333 | 10.92586333 |
| Ccdc56        | chr11:101139283-101140262 | 8.654663333 | 26.04311    |
| Med23         | chr10:24589791-24633335   | 8.649246667 | 6.372763333 |
| Mob1a         | chr6:83276032-83290943    | 8.646876667 | 10.68984    |
| Gtpbp10       | chr5:5537456-5559501      | 8.6468      | 4.446717667 |
| 2900006K08Rik | chr12:85750017-85774730   | 8.64433     | 2.014676    |
| Vkorc1l1      | chr5:130417982-130458760  | 8.64399     | 12.73010667 |
| Hist2h2ac     | chr3:96024377-96024767    | 8.642923333 | 3.59978     |
| Tmem54        | chr4:128782773-128788870  | 8.64156     | 31.00673333 |
| Cog7          | chr7:129066352-129125207  | 8.634746667 | 3.681226667 |
| Hs1bp3        | chr12:8320238-8350630     | 8.634176667 | 13.92526333 |
| 1200016B10Rik | chr1:153214828-153275565  | 8.634093333 | 9.350563333 |
| lppk          | chr13:49516679-49558359   | 8.632656667 | 5.938550667 |
| BC025920      | chr10:81069052-81072581   | 8.632595333 | 6.163426333 |
| Elp3          | chr14:66149282-66211949   | 8.631056667 | 11.42601333 |
| Mtmr1         | chrX:68617934-68672371    | 8.629083333 | 15.78676667 |
| Gys1          | chr7:52690208-52711987    | 8.62898     | 6.6953      |
| Il17ra        | chr6:120413214-120433745  | 8.624673333 | 8.47673     |
| Magi3         | chr3:103817187-104024329  | 8.621956667 | 6.457723333 |
| Fam59a        | chr18:21285842-21458640   | 8.621286667 | 5.025963333 |
| Fbxo34        | chr14:48092235-48151637   | 8.619676667 | 2.645363333 |
| Cdk5rap3      | chr11:96769099-96777795   | 8.619253333 | 9.720773333 |
| 2610034B18Rik | chr7:87070244-87080150    | 8.616233333 | 10.48017    |
| Hist1h3d      | chr13:23667670-23668081   | 8.611433333 | 5.90559     |
| Ranbp10       | chr8:108292207-108351250  | 8.604773333 | 15.72097667 |
| Dnajc19       | chr3:33956679-33980248    | 8.603113333 | 5.932584    |
| 1810032O08Rik | chr11:116532973-116537112 | 8.59792     | 17.86656    |
| Wipi1         | chr11:109434834-109472703 | 8.59775     | 7.888803333 |
| Traf4         | chr11:77971924-77979052   | 8.596783333 | 16.7087     |
| AU019823      | chr9:50413344-50425569    | 8.59575     | 8.99597     |
| Kifc2         | chr15:76491070-76498626   | 8.59102     | 20.89076    |
| Fbrsl1        | chr5:110790770-110877522  | 8.588746667 | 8.879596667 |
| Pdpm          | chr4:142857324-142889410  | 8.586139267 | 1.054546667 |
| Prkag3        | chr1:74785495-74795529    | 8.58527     | 0.0162337   |



|               |                           |             |             |
|---------------|---------------------------|-------------|-------------|
| Zfp295        | chr16:98168598-98183786   | 8.584306667 | 10.98772333 |
| Llg1          | chr11:60513191-60527690   | 8.58127     | 12.34177    |
| Tmub2         | chr11:102146274-102150738 | 8.58005     | 8.53457     |
| Haus2         | chr2:120435171-120446554  | 8.579823333 | 19.86001333 |
| Spats2l       | chr1:57831704-58005241    | 8.57921     | 15.91816667 |
| Snord17       | chr2:144091717-144091938  | 8.578836667 | 17.74427    |
| Repin1        | chr6:48543881-48549081    | 8.576853333 | 16.63662333 |
| 4931406C07Rik | chr9:15087780-15110892    | 8.563583333 | 11.82354667 |
| Pex11c        | chr8:3458816-3467648      | 8.563023333 | 3.627782    |
| 1700040I03Rik | chr6:85396778-85401964    | 8.56202     | 9.906113333 |
| Aldh18a1      | chr19:40624746-40662953   | 8.561843333 | 5.375766667 |
| Mettl17       | chr14:52504516-52511543   | 8.558726667 | 4.564954    |
| Nxt2          | chrX:138662479-138674235  | 8.55845     | 13.20446667 |
| Mrpl10        | chr11:96902899-96910527   | 8.55781     | 6.459896667 |
| Ttl4          | chr1:74708327-74744547    | 8.553716667 | 7.838413333 |
| Slc25a19      | chr11:115475494-115489609 | 8.552733333 | 5.328203333 |
| Mcm9          | chr10:53257129-53350245   | 8.548556667 | 3.811626667 |
| Dennd1a       | chr2:37654509-38142904    | 8.54386     | 5.54988     |
| Ilvbl         | chr10:78037244-78047247   | 8.538786667 | 14.10023333 |
| Sarnp         | chr10:128258826-128314694 | 8.53793     | 5.05919     |
| Zfp81         | chr17:33470672-33495823   | 8.53606     | 15.22129667 |
| lpo8          | chr6:148719205-148779989  | 8.53373     | 10.64741    |
| Zc3h10        | chr10:127980620-127984800 | 8.533183333 | 8.634756667 |
| Sdad1         | chr5:92713035-92739050    | 8.532303333 | 4.91786     |
| Ube2w         | chr1:16559486-16609367    | 8.530106667 | 11.55989333 |
| 4930444M15Rik | chr14:76914364-76920662   | 8.527456667 | 1.601549467 |
| Caskin2       | chr11:115660665-115674906 | 8.52589     | 3.321213333 |
| Tada1         | chr1:168309297-168323751  | 8.52256     | 13.30248667 |
| Rfx5          | chr3:94758936-94765483    | 8.518486667 | 12.74219333 |
| 2310022A10Rik | chr7:28338313-28367117    | 8.516383333 | 2.317401    |
| Zmym6         | chr4:126754626-126801538  | 8.514046667 | 11.60502    |
| Peg13         | chr15:72636029-72640754   | 8.51268     | 8.53725     |
| Dgcr2         | chr16:17840450-17891821   | 8.51241     | 14.37747667 |
| Ccdc109a      | chr10:58909731-59079440   | 8.512276667 | 6.96062     |
| Amigo1        | chr3:107989252-107994695  | 8.51161     | 12.42343    |
| Znfx1         | chr2:166861296-166888515  | 8.51075     | 6.63521     |
| Gpr107        | chr2:31007835-31072087    | 8.50647     | 10.67725667 |
| Txnrd3        | chr6:89593981-89625523    | 8.50635     | 5.654991233 |
| Serpinf1      | chr11:75223530-75236125   | 8.505923333 | 4.28169     |
| 2700078E11Rik | chr19:60600598-60656926   | 8.502446667 | 11.10227    |
| Tgfb1         | chr4:47366176-47427796    | 8.499063333 | 19.83983333 |
| Rbpj          | chr5:53947017-54048684    | 8.497276667 | 9.615733333 |
| Wfdc5         | chr2:164002060-164008478  | 8.49478     | 7.506399333 |
| Mrpl22        | chr11:57985155-57993082   | 8.49038     | 4.843196667 |
| Acsf3         | chr8:125299404-125341781  | 8.482626667 | 4.006491833 |
| Dync2h1       | chr9:6928502-7177046      | 8.481933333 | 9.049643333 |
| Ssh3          | chr19:4261667-4269172     | 8.48047     | 13.72737333 |
| Slc25a38      | chr9:120019516-120033437  | 8.479566667 | 5.858133333 |
| Ndufaf1       | chr2:119481186-119488534  | 8.47906     | 7.175046667 |
| Ntpcr         | chr8:128258102-128272135  | 8.477596667 | 2.11982     |
| Zfp703        | chr8:28087807-28091934    | 8.476503333 | 15.52253333 |
| Prmt10        | chr8:80073295-80105237    | 8.473996667 | 9.563533333 |

|               |                               |             |             |
|---------------|-------------------------------|-------------|-------------|
| 2810432L12Rik | chr4:49597377-49610742        | 8.467083333 | 8.86189     |
| Brpf3         | chr17:28938070-28975734       | 8.46466     | 8.395116667 |
| Smg5          | chr3:88140181-88166259        | 8.460196667 | 12.86305667 |
| Gm19522       | chr16:42884482-42912183       | 8.455896667 | 1.786026667 |
| Tjp2          | chr19:24168991-24299516       | 8.455206667 | 12.97236    |
| Pcsk7         | chr9:45714651-45737805        | 8.4536      | 5.082226667 |
| Gm2447        | chr3:52543645-52580576        | 8.453573333 | 0.097119133 |
| Mpp2          | chr11:101918330-101949829     | 8.452703333 | 7.039376667 |
| Gm5567        | chr6:40060251-40198352        | 8.451676667 | 11.939945   |
| 0610012G03Rik | chr16:31947136-31948607       | 8.451536667 | 5.591983333 |
| Obfc1         | chr19:47575537-47611510       | 8.450111    | 6.206186667 |
| Bzw2          | chr12:36818421-36883412       | 8.444966667 | 11.66143    |
| Npat          | chr9:53345151-53383732        | 8.443353333 | 8.45439     |
| Ccdc89        | chr7:97574821-97577174        | 8.442653333 | 1.54952     |
| Polr2c        | chr8:97381349-97388140        | 8.440413333 | 6.63883     |
| Snx19         | chr9:30234913-30274311        | 8.439286667 | 8.029716667 |
| Mccc1         | chr3:35858230-35899600        | 8.427043333 | 7.264393333 |
| Ncoa3         | chr2:165818136-165898742      | 8.422586667 | 9.187823333 |
| Zkscan3       | chr13:21478872-21494624       | 8.417146667 | 13.48506667 |
| Dhrs7b        | chr11:60644132-60671925       | 8.4138      | 7.18576     |
| Xaf1          | chr11:72115130-72127235       | 8.411983333 | 5.419176667 |
| AW554918      | chr18:25327520-25625822       | 8.410656667 | 10.2857     |
| Tusc2         | chr9:107465585-107468439      | 8.409773333 | 5.399413333 |
| Poc1b         | chr10:98569804-98660622       | 8.405683333 | 8.158393333 |
| Gm962         | chr19:5568073-5571261         | 8.40548     | 6.181646667 |
| Ly96          | chr1:16678536-16699686        | 8.403561333 | 36.26603333 |
| Sema6c        | chr3:94968295-94977238        | 8.401643333 | 8.9745      |
| Mterfd2       | chr1:95195787-95202447        | 8.39691     | 20.70416667 |
| Cyth1         | chr11:118025479-118109906     | 8.396006667 | 16.84233333 |
| Hexb          | chr13:97946285-97968312       | 8.394406667 | 4.334146667 |
| Arhgef17      | chr7:108018259-108080675      | 8.387316667 | 7.500163333 |
| Tars2         | chr3:95543896-95558900        | 8.385446667 | 6.236753333 |
| C030006K11Rik | chr15:76551894-76554275       | 8.381156667 | 14.97489667 |
| Dnajb14       | chr3:137530638-137571895      | 8.374946667 | 4.324363333 |
| Il17rb        | chr14:30809353-30822082       | 8.372953333 | 3.879723333 |
| Impad1        | chr4:4691500-4720453          | 8.369183333 | 14.56076667 |
| Ppp2r5b       | chr19:6227766-6235840         | 8.368753333 | 5.617213333 |
| Hinfp         | chr9:44103755-44113754        | 8.36782     | 7.6568      |
| Apobec3       | chr15:79722837-79738859       | 8.367323333 | 4.280406667 |
| Xpot          | chr10:121024435-121063372     | 8.364523333 | 9.746766667 |
| Surf6         | chr2:26746291-26758333        | 8.361803333 | 5.48222     |
| Zfp259        | chr9:46081146-46090725        | 8.355156667 | 8.47038     |
|               | 4-Sep chr16:18621903-18630031 | 8.35343     | 22.84981    |
| Fam76a        | chr4:132455127-132478466      | 8.34573     | 7.159756667 |
| Susd4         | chr1:184695036-184825785      | 8.341933333 | 10.19454667 |
| AW551984      | chr9:39394980-39411709        | 8.34133     | 2.015563333 |
| Zfp692        | chr11:58120570-58128115       | 8.341056667 | 20.7291     |
| Miip          | chr4:147234886-147242828      | 8.34075     | 10.59487333 |
| Tfip11        | chr5:112755388-112767093      | 8.339426667 | 5.490316667 |
| Rragd         | chr4:33069972-33109155        | 8.33869     | 2.789473333 |
| Sh2d4a        | chr8:70800426-70871603        | 8.336803333 | 4.330993067 |
| AW209491      | chr13:14722511-14730469       | 8.33613     | 6.235102    |

|               |                           |             |             |
|---------------|---------------------------|-------------|-------------|
| Psmf1         | chr2:151541797-151567029  | 8.33483     | 9.67424     |
| Cep164        | chr9:45575028-45636721    | 8.333876667 | 15.40448667 |
| 2610002M06Rik | chrX:104978090-105011673  | 8.333416667 | 8.431643333 |
| Kcnj1         | chr9:32180002-32206779    | 8.333413333 | 6.5826      |
| Slc39a1       | chr3:90052113-90057534    | 8.328556667 | 17.77576667 |
| Susd2         | chr10:75099363-75106753   | 8.327426667 | 3.363777333 |
| Cept1         | chr3:106305177-106350679  | 8.327233333 | 4.428036667 |
| Zfp839        | chr12:112088488-112108208 | 8.325943333 | 27.02507    |
| Igfbp2        | chr1:72871053-72899045    | 8.32199     | 27.097      |
| Amdhd2        | chr17:24292799-24300700   | 8.317496667 | 8.393333333 |
| Slc16a5       | chr11:115323786-115335712 | 8.316016667 | 4.3801      |
| Card10        | chr15:78605565-78633472   | 8.312456667 | 2.499553333 |
| Orc2          | chr1:58519614-58561763    | 8.31138     | 8.697023333 |
| Rnf139        | chr15:58720783-58733945   | 8.31114     | 11.82940333 |
| Rab12         | chr17:66843851-66869010   | 8.309136667 | 11.39761667 |
| Dpy19l4       | chr4:11192225-11249278    | 8.30814     | 10.151416   |
| 4933439C10Rik | chr11:59319186-59324569   | 8.306816667 | 6.786553333 |
| Pprc1         | chr19:46131028-46147399   | 8.303876667 | 8.25005     |
| Wdr77         | chr3:105762415-105772678  | 8.301783333 | 6.666636667 |
| 2010204K13Rik | chrX:6988942-7000114      | 8.299001667 | 17.83523667 |
| Ap1p1         | chr7:31219998-31230601    | 8.29722     | 29.31973333 |
| Mob3c         | chr4:115500696-115508788  | 8.294196667 | 12.5749     |
| Satb1         | chr17:51875511-51972615   | 8.292903333 | 2.078802333 |
| Zfp11         | chr19:6080762-6084891     | 8.290383333 | 9.559423333 |
| Dcun1d2       | chr8:13255962-13288126    | 8.289953333 | 9.196826667 |
| Ankra2        | chr13:99033196-99043868   | 8.289686667 | 5.84667     |
| Nudt16l1      | chr16:4939110-4941025     | 8.2896      | 11.24824333 |
| Nsun5         | chr5:135845822-135852667  | 8.288636667 | 2.411660333 |
| Gtf2h4        | chr17:35804683-35810627   | 8.288556667 | 5.876193333 |
| Tbc1d23       | chr16:57168976-57231579   | 8.28836     | 5.916553333 |
| Poldip2       | chr11:78325797-78336238   | 8.285746667 | 15.43323333 |
| Ccbl1         | chr2:30040650-30061219    | 8.282656667 | 38.65598667 |
| Gm2897        | chr14:3049285-3077025     | 8.279926667 | 4.666623333 |
| Ugdh          | chr5:65804460-65827081    | 8.276033333 | 5.47713     |
| Dear1         | chr3:84768977-84769502    | 8.274235333 | 36.3746     |
| Pigo          | chr4:43030509-43038628    | 8.271766667 | 10.17022333 |
| Yif1b         | chr7:30023341-30032551    | 8.2662      | 6.60877     |
| Loh12cr1      | chr6:134589529-134661202  | 8.265893333 | 7.980326667 |
| Glt8d1        | chr14:31814578-31825627   | 8.26496     | 8.528073333 |
| Dtx3l         | chr16:35926600-35939113   | 8.26422     | 9.357276667 |
| Csnk2a2       | chr8:97969995-98012720    | 8.261543333 | 9.056186667 |
| BC017643      | chr11:121083902-121090623 | 8.260886667 | 5.69084     |
| Icmt          | chr4:151671322-151681235  | 8.259716667 | 12.20603333 |
| Lman2l        | chr1:36480030-36502084    | 8.258593333 | 13.88341667 |
| LOC100503496  | chr11:109301391-109314673 | 8.25524     | 8.851333333 |
| Pdcd2l        | chr7:34969515-34981666    | 8.253596667 | 12.78006    |
| D730005E14Rik | chr15:79719961-79723568   | 8.2535      | 0.174695333 |
| Tti2          | chr8:32260787-32275175    | 8.252713333 | 8.100542667 |
| Spice1        | chr16:44347513-44388605   | 8.252106667 | 6.249396667 |
| Mfn2          | chr4:147247703-147278928  | 8.251836667 | 16.6798     |
| Samd14        | chr11:94871192-94887401   | 8.251143333 | 2.255543333 |
| Zfp846        | chr9:20385771-20399637    | 8.250653333 | 3.6905      |

|               |                           |             |             |
|---------------|---------------------------|-------------|-------------|
| Drg2          | chr11:60268118-60282207   | 8.24924     | 8.976043333 |
| Rcan3         | chr4:134968223-134989720  | 8.24811     | 12.05523333 |
| AA467197      | chr2:122463622-122466812  | 8.246423333 | 0           |
| Rab39b        | chrX:72817396-72823543    | 8.243383333 | 16.36223333 |
| Edem2         | chr2:155527408-155555211  | 8.233533333 | 2.340796667 |
| Pamr1         | chr2:102390177-102483197  | 8.231353333 | 2.602035    |
| Tns3          | chr11:8331654-8564538     | 8.230933333 | 9.0391      |
| Tmem41a       | chr16:21934399-21947625   | 8.230367    | 11.29693    |
| Cplx1         | chr5:108947572-108979046  | 8.22968     | 0           |
| Igf2bp2       | chr16:22059081-22163372   | 8.228106667 | 3.392387333 |
| Anks1         | chr17:28046284-28199581   | 8.222523333 | 9.68009     |
| Lrrc8b        | chr5:105844793-105915208  | 8.218643333 | 15.4974     |
| A730011L01Rik | chr11:119352660-119372779 | 8.216173333 | 6.045013333 |
| Adrb1         | chr19:56796861-56799352   | 8.212446667 | 0.369343333 |
| Pxk           | chr14:8930726-8997625     | 8.211883333 | 5.317176667 |
| Crif3         | chr11:79860000-79894457   | 8.207216667 | 6.417703333 |
| Fut11         | chr14:21514189-21519419   | 8.206886667 | 5.511411    |
| Letmd1        | chr15:100299464-100309683 | 8.201443333 | 11.836      |
| Il1a          | chr2:129125345-129135708  | 8.196896667 | 0.124455    |
| Gdap2         | chr3:99966440-100010904   | 8.19609     | 8.57234     |
| Hps3          | chr3:19895944-19935310    | 8.190593333 | 3.127251    |
| Hist2h2ab     | chr3:96023838-96024231    | 8.19008     | 0.130399667 |
| Fam83c        | chr2:155654918-155660590  | 8.18597     | 12.90114667 |
| Foxa1         | chr12:58641618-58647108   | 8.18388     | 6.75214     |
| 1600012F09Rik | chr13:18078473-18085185   | 8.183356667 | 6.532786667 |
| Tmem173       | chr18:35893331-35900208   | 8.183316667 | 1.786076667 |
| LOC626693     | chr16:43410630-43420309   | 8.180836667 | 8.057653333 |
| Sart3         | chr5:114192454-114221658  | 8.17697     | 13.51452667 |
| C230096C10Rik | chr4:138908507-138934645  | 8.166573333 | 13.82468333 |
| Rprd1a        | chr18:24643462-24688705   | 8.166503333 | 12.02923333 |
| Sgk1          | chr10:21601989-21719708   | 8.164743333 | 21.91166667 |
| Ctsf          | chr19:4855128-4860912     | 8.1639      | 2.948843    |
| Zbtb25        | chr12:77449886-77470547   | 8.163576667 | 3.914786667 |
| Magi1         | chr6:93625448-94233898    | 8.160013333 | 17.2812     |
| Rras          | chr7:52273376-52277014    | 8.159256667 | 8.41871     |
| Casp3         | chr8:47702802-47724062    | 8.159253333 | 12.45184667 |
| 1110059G10Rik | chr9:122854206-122860118  | 8.15793     | 2.103169    |
| Denr          | chr5:124357283-124378841  | 8.147026667 | 8.05433     |
| Hmgxb3        | chr18:61290930-61336704   | 8.143123333 | 7.34598     |
| Ptcd3         | chr6:71830631-71858756    | 8.14244     | 16.98326667 |
| Nab1          | chr1:52512692-52557292    | 8.139496667 | 12.28986333 |
| Hars2         | chr18:36942933-36952214   | 8.135276667 | 7.96661     |
| Ttc38         | chr15:85662733-85689252   | 8.13339     | 4.329704    |
| Trex2         | chrX:70679043-70680682    | 8.12824     | 8.126815667 |
| Lrrc26        | chr2:25145430-25146713    | 8.12764     | 12.44565467 |
| Rbfox2        | chr15:76909419-77137483   | 8.12592     | 16.6391     |
| 1500031L02Rik | chr16:32099887-32108140   | 8.12493     | 13.59000667 |
| Dock5         | chr14:68369984-68551629   | 8.120036667 | 11.77776333 |
| 4930480K15Rik | chr17:91260508-91266442   | 8.114813333 | 5.34812     |
| Foxe1         | chr4:46357065-46358181    | 8.111556667 | 9.71956     |
| Ankrd50       | chr3:38348182-38383738    | 8.108346667 | 14.1332     |
| Elmo2         | chr2:165113530-165151979  | 8.104983333 | 6.2038      |

|               |                           |             |             |
|---------------|---------------------------|-------------|-------------|
| Vars          | chr17:35137851-35153274   | 8.102023333 | 3.76474     |
| Stk19         | chr17:34960937-34973848   | 8.09957     | 14.24329667 |
| 4930542H20Rik | chr11:79483874-79488588   | 8.09747     | 0           |
| Tssk3         | chr4:129166251-129168014  | 8.09702     | 0.313178667 |
| Cpsf3l        | chr4:155243675-155263212  | 8.09408     | 7.45967     |
| Polr3e        | chr7:128061257-128090946  | 8.09305     | 8.288733333 |
| Htra2         | chr6:83001261-83004565    | 8.09241     | 7.23351     |
| lkzf2         | chr1:69577783-69732534    | 8.090636667 | 8.54509     |
| Tfrc          | chr16:32608981-32632880   | 8.088583333 | 14.71477667 |
| 1600002K03Rik | chr10:79635688-79637864   | 8.085376667 | 2.046529667 |
| Nip7          | chr8:109580776-109584828  | 8.085103333 | 1.823391    |
| Pcnx          | chr12:82961016-83101911   | 8.082846667 | 8.46491     |
| Haus7         | chrX:70682653-70704368    | 8.082006667 | 13.58453    |
| 2610507I01Rik | chr11:59011294-59015933   | 8.07978     | 8.47414     |
| Gpr137        | chr19:7012559-7016940     | 8.07806     | 12.08829667 |
| Ophn1         | chrX:95752853-96086324    | 8.06129     | 11.06531333 |
| Fam115c       | chr6:42573041-42595040    | 8.059946667 | 14.75293667 |
| Pstpip1       | chr9:55937782-55976697    | 8.05879     | 15.03734333 |
| Pdik1l        | chr4:133830920-133843761  | 8.05667     | 10.55569667 |
| Mboat4        | chr8:35178083-35188239    | 8.05431     | 2.306245    |
| lft140        | chr17:25153030-25236442   | 8.053676667 | 7.58734     |
| Pcyt1a        | chr16:32431006-32475151   | 8.052173333 | 8.72713     |
| Pld5          | chr1:177892436-178205443  | 8.052133333 | 39.13413333 |
| Klh128        | chr12:66043426-66066523   | 8.048163333 | 5.530006667 |
| Asxl1         | chr2:153171874-153229743  | 8.04649     | 11.87275333 |
| Pdzd2         | chr15:12286808-12522311   | 8.04446     | 13.71350667 |
| Rai1          | chr11:59918514-60012697   | 8.043806667 | 9.645186667 |
| Tsc1          | chr2:28496762-28546687    | 8.041563333 | 6.307276667 |
| Rpain         | chr11:70783701-70791435   | 8.035006667 | 8.067087333 |
| Tsfm          | chr10:126459387-126467870 | 8.033876667 | 6.657773333 |
| Jazf1         | chr6:52718061-53018618    | 8.0309      | 19.0642     |
| Gm5523        | chr1:13775765-13777010    | 8.023013333 | 6.740803333 |
| Nipa1         | chr7:63233853-63274943    | 8.019686667 | 3.20945     |
| Lancl1        | chr1:67047090-67085446    | 8.019513333 | 11.67009333 |
| A430005L14Rik | chr4:153331345-153336033  | 8.01806     | 2.311       |
| Usp1          | chr4:98590500-98602224    | 8.009813333 | 12.62855    |
| Eftud1        | chr7:89797123-89926362    | 8.00717     | 8.235016667 |
| Tmx3          | chr18:90679545-90712659   | 8.00199     | 9.469416667 |
| Ccdc22        | chrX:7170934-7182546      | 7.99847     | 7.687333333 |
| Mks1          | chr11:87666726-87677181   | 7.99556     | 0.921063    |
| Gzf1          | chr2:148506855-148518685  | 7.994663333 | 10.14776333 |
| Fzr1          | chr10:80829623-80841115   | 7.990073333 | 9.20163     |
| Parp14        | chr16:35832963-35871468   | 7.988243333 | 2.045321467 |
| Dhrs4         | chr14:56097594-56109177   | 7.986033333 | 8.497583333 |
| Tmem93        | chr11:72989004-72990544   | 7.98478     | 9.617903333 |
| Ept1          | chr5:30559157-30598976    | 7.98378     | 13.0719     |
| Gm10406       | chr14:7838628-7859963     | 7.976513333 | 3.80941     |
| Nme5          | chr18:34722294-34738760   | 7.97571     | 10.70473333 |
| Tas2r120      | chr6:132606974-132607862  | 7.972036667 | 0           |
| Spsb3         | chr17:25023618-25029092   | 7.971076667 | 7.444506667 |
| Alg1          | chr16:5233713-5245001     | 7.96965     | 6.352273335 |
| Thap11        | chr8:108379002-108380850  | 7.965613333 | 10.48607333 |

|               |                           |             |             |
|---------------|---------------------------|-------------|-------------|
| Alas1         | chr9:106135785-106150285  | 7.964663333 | 15.89159667 |
| Lactb         | chr9:66803199-66823291    | 7.961323333 | 5.948642667 |
| Khk           | chr5:31224267-31233619    | 7.95914     | 15.90263333 |
| Pias3         | chr3:96500297-96509993    | 7.958433333 | 10.81894333 |
| Cenpj         | chr14:57145597-57190683   | 7.958293333 | 5.631126667 |
| Sh2b1         | chr7:133610507-133618644  | 7.956836667 | 8.310613333 |
| Dusp26        | chr8:32200133-32207519    | 7.95591     | 1.179083333 |
| Lss           | chr10:75994371-76016679   | 7.954313333 | 17.03059333 |
| Ppp2r5a       | chr1:193175859-193220920  | 7.95182     | 10.80960333 |
| FancI         | chr11:26287083-26371876   | 7.951463333 | 3.86656     |
| Fam129c       | chr8:74121544-74132048    | 7.94619     | 5.530456667 |
| PlekHg2       | chr7:29144622-29157681    | 7.94589     | 9.04938     |
| 0610007P08Rik | chr13:63916627-64001609   | 7.94255     | 8.062616667 |
| Usp11         | chrX:20281034-20297665    | 7.94126     | 13.00332667 |
| Hyls1         | chr9:35368405-35377654    | 7.940106667 | 5.313636667 |
| 2310035K24Rik | chr2:131036175-131039250  | 7.938563333 | 3.900203667 |
| Nkapl         | chr13:21558915-21560370   | 7.937616667 | 0.180471    |
| Mknk1         | chr4:115511850-115551853  | 7.936946667 | 8.5616      |
| Ttf1          | chr2:28915782-28943170    | 7.93058     | 3.765484667 |
| Cyp2s1        | chr7:26587494-26601549    | 7.928383333 | 18.22540333 |
| 2900005J15Rik | chr5:24606792-24608825    | 7.926274667 | 8.248513333 |
| Egfr          | chr11:16652205-16813910   | 7.92348     | 10.63190667 |
| Epn1          | chr7:5031836-5049780      | 7.922363333 | 17.86999667 |
| Trim68        | chr7:109826093-109835840  | 7.92183     | 4.363316667 |
| Rpl26         | chr11:68715067-68718036   | 7.920163359 | 4.481179081 |
| Ap1s3         | chr1:79603450-79668547    | 7.917633333 | 8.682546667 |
| Ndst2         | chr14:21542951-21553784   | 7.915073333 | 9.081556667 |
| Ephb6         | chr6:41555480-41570506    | 7.908403333 | 30.7116     |
| Trim13        | chr14:62217062-62224782   | 7.90795     | 30.3796     |
| Zbtb48        | chr4:151393884-151401780  | 7.906866667 | 23.37015    |
| Ston2         | chr12:92871448-93024876   | 7.90333     | 11.15536667 |
| Pigm          | chr1:174306661-174314230  | 7.901136667 | 6.872616667 |
| Gm3428        | chr9:35656129-35657465    | 7.900783333 | 1.372583333 |
| Tmem132e      | chr11:82202401-82259829   | 7.900746667 | 14.00175333 |
| Gas2l1        | chr11:4954133-4965330     | 7.89963     | 14.00330333 |
| Pcdhga1       | chr18:37821598-38001524   | 7.89725     | 4.800773333 |
| Strada        | chr11:106024287-106054917 | 7.895406667 | 9.036516667 |
| Nrp2          | chr1:62749890-62865266    | 7.894916667 | 13.14965    |
| Cxx1b         | chrX:50972353-50973585    | 7.891383333 | 11.18647333 |
| BC016579      | chr16:45626960-45654231   | 7.890723333 | 0.920353667 |
| Xpo7          | chr14:71054052-71166435   | 7.886106667 | 12.96193333 |
| Fam160b1      | chr19:57435498-57464084   | 7.885473333 | 5.194253333 |
| Rprml         | chr11:103510822-103511894 | 7.882096667 | 49.2172     |
| Ripk3         | chr14:56403831-56407694   | 7.881686667 | 11.68322    |
| Asb13         | chr13:3633321-3651025     | 7.87301     | 8.952396667 |
| Pla2r1        | chr2:60255599-60391365    | 7.87269     | 8.117253333 |
| Cnm2          | chr19:46836098-46953070   | 7.871823333 | 6.662446667 |
| Scd1          | chr19:44468939-44482199   | 7.87178     | 6.284913333 |
| Fars2         | chr13:36209279-36629462   | 7.87105     | 6.798456667 |
| Tmem44        | chr16:30511940-30550664   | 7.867896667 | 0.782435767 |
| Chm           | chrX:110154200-110299124  | 7.866503333 | 8.278943333 |
| Ptk2b         | chr14:66772093-66899889   | 7.864423333 | 9.04961     |

|               |                           |             |             |
|---------------|---------------------------|-------------|-------------|
| Pogk          | chr1:168323741-168339959  | 7.8632      | 12.22277333 |
| Bspry         | chr4:62141100-62158332    | 7.863023333 | 10.23922    |
| Cutc          | chr19:43827512-43843128   | 7.860756667 | 4.466296667 |
| Lnp           | chr2:74352893-74417005    | 7.856473333 | 5.039913333 |
| Ssbp3         | chr4:106584074-106722299  | 7.856076667 | 14.86553333 |
| Snrnp40       | chr4:130037378-130067278  | 7.855666667 | 8.564906667 |
| Trim17        | chr11:58777282-58785231   | 7.85386     | 0.823705    |
| Pias4         | chr10:80616715-80630465   | 7.853293333 | 8.304773333 |
| Trim62        | chr4:128561383-128588570  | 7.853166667 | 19.96166667 |
| lrf2bp1       | chr7:19589413-19592112    | 7.852436667 | 3.63677     |
| Prrg2         | chr7:52308976-52317022    | 7.851736667 | 12.95457333 |
| Cabp1         | chr5:115618699-115636130  | 7.842783333 | 3.974011    |
| 2410076I21Rik | chr9:58500662-58589366    | 7.833713333 | 13.4529     |
| Trim23        | chr13:104969177-104992128 | 7.83106     | 12.74156667 |
| Fastk         | chr5:23946857-23951053    | 7.828946667 | 15.53238333 |
| Rad1          | chr15:10415788-10423446   | 7.82792     | 3.070681667 |
| A430035B10Rik | chr6:8457058-8459161      | 7.8279      | 0.818932    |
| 1810063B07Rik | chr14:20894857-20902394   | 7.827863333 | 1.235815333 |
| Mon1a         | chr9:107790459-107805470  | 7.825826667 | 9.447594    |
| Cog2          | chr8:127044666-127075907  | 7.820933333 | 6.301856667 |
| Pik3cb        | chr9:98938820-99040630    | 7.818333333 | 11.93596667 |
| Ccdc85b       | chr19:5453162-5457563     | 7.817616667 | 5.711936667 |
| 3230401D17Rik | chr2:163231557-163245206  | 7.817568667 | 6.256666667 |
| Ctdspl        | chr9:118835653-118953237  | 7.812216667 | 4.798333333 |
| Nfs1          | chr2:155949372-155969922  | 7.809916667 | 19.69033    |
| Bloc1s3       | chr7:20091152-20093680    | 7.809763333 | 4.888386667 |
| lpo13         | chr4:117567097-117587604  | 7.805673333 | 15.1667     |
| Lypla1        | chr1:4797973-4836816      | 7.804856667 | 9.758926667 |
| Dusp28        | chr1:94803565-94805197    | 7.80288     | 11.32214    |
| Nkiras2       | chr11:100484268-100488916 | 7.801926667 | 12.33704333 |
| Med19         | chr2:84518558-84528372    | 7.801886667 | 10.37418667 |
| Syng1         | chr15:79921763-79949931   | 7.799466667 | 4.886166667 |
| Rab4b         | chr7:27953451-27963902    | 7.79901     | 15.15041667 |
| Abca5         | chr11:110130682-110199030 | 7.797856667 | 2.771183333 |
| Exosc4        | chr15:76157826-76161100   | 7.797653333 | 11.56763333 |
| Prkcd         | chr14:31408539-31439394   | 7.79562     | 2.39848     |
| Klhl5         | chr5:65522469-65559381    | 7.792693333 | 4.310873333 |
| Sorbs3        | chr14:70580274-70607444   | 7.790563333 | 5.034261333 |
| Tmem184c      | chr8:80119878-80134552    | 7.78978     | 13.41827    |
| Mphosph6      | chr8:120315544-120325829  | 7.784703333 | 19.9103     |
| Nt5c2         | chr19:46961320-47089679   | 7.78456     | 10.49364667 |
| Klhl17        | chr4:155603152-155608966  | 7.78222     | 7.392306667 |
| Thap6         | chr5:92391907-92401163    | 7.775166667 | 2.851161333 |
| 4930544O15Rik | chr4:115452438-115453639  | 7.77399     | 0           |
| Tmem62        | chr2:120802797-120833578  | 7.773973333 | 6.29743     |
| Ccbl2         | chr3:142364043-142407874  | 7.77396     | 5.464255    |
| Lrpprc        | chr17:85104586-85190126   | 7.77292     | 12.79764    |
| Aqp3          | chr4:41039756-41045216    | 7.77031     | 33.77103333 |
| Ap2a1         | chr7:52155742-52184860    | 7.769106667 | 11.42735    |
| 5730437N04Rik | chr17:5410863-5440260     | 7.767633333 | 15.56316667 |
| 2810021J22Rik | chr11:58680741-58697840   | 7.76723     | 3.733287    |
| Gm14479       | chrX:10901784-10902102    | 7.763023333 | 0.197470667 |

|               |                           |             |             |
|---------------|---------------------------|-------------|-------------|
| Hsd17b11      | chr5:104418783-104450815  | 7.76292     | 6.62754     |
| Ggnbp1        | chr17:27154979-27173323   | 7.760743333 | 7.473253    |
| Ruvbl1        | chr6:88415416-88447560    | 7.753316667 | 14.34964667 |
| BB283400      | chr6:30126622-30128040    | 7.75307     | 0.367149    |
| Rpap1         | chr2:119589694-119613273  | 7.750733333 | 7.03369     |
| Psen2         | chr1:182157134-182186431  | 7.748983333 | 3.727326    |
| Dak           | chr19:10666686-10678748   | 7.74885     | 2.321051267 |
| Gm2382        | chr9:88583442-88614636    | 7.738863333 | 16.08848333 |
| Rps6kc1       | chr1:192596757-192735649  | 7.73777     | 7.05544     |
| Rpf2          | chr10:39943051-39966845   | 7.73713     | 18.74613333 |
| Ccdc130       | chr8:86781693-86794259    | 7.73574     | 4.482598667 |
| Ccdc50        | chr16:27389062-27452304   | 7.735423333 | 13.08599333 |
| Wbscr22       | chr5:135528826-135540536  | 7.735366667 | 12.90838667 |
| Plod3         | chr5:137462888-137472516  | 7.730736667 | 5.53673     |
| Heatr6        | chr11:83567138-83597256   | 7.728456667 | 9.20158     |
| Gpn2          | chr4:133140287-133147650  | 7.726926667 | 3.709120333 |
| 4930429B21Rik | chr3:32264410-32266360    | 7.725426667 | 1.481345333 |
| Aen           | chr7:86040812-86053719    | 7.724723333 | 10.60383333 |
| Ccdc117       | chr11:5428890-5442220     | 7.723576667 | 14.60143333 |
| Intu          | chr3:40439688-40508662    | 7.716626667 | 6.467663333 |
| Dok4          | chr8:97387727-97400212    | 7.71321     | 13.04966    |
| Ndufab1       | chr7:129231557-129245362  | 7.710613333 | 5.70701     |
| Tmppe         | chr9:114310212-114320319  | 7.709913333 | 5.859213333 |
| Cant1         | chr11:118267602-118280366 | 7.707233333 | 4.46788     |
| Med9          | chr11:59761715-59776808   | 7.70706     | 6.902723333 |
| Mtrf1l        | chr10:4522597-4534654     | 7.705876667 | 6.641033333 |
| Fpgt          | chr3:154747882-154756342  | 7.70573     | 6.922446667 |
| Mmp15         | chr8:97876236-97898193    | 7.70259     | 7.439676667 |
| Dsg1a         | chr18:20469373-20501854   | 7.70232     | 47.47243333 |
| Serpine2      | chr1:79790895-79855240    | 7.699196667 | 19.68703333 |
| Zfand1        | chr3:10339955-10351301    | 7.697326667 | 20.4033     |
| Mrpl1         | chr5:96639133-96695728    | 7.697276667 | 7.837953333 |
| Dnajc11       | chr4:151307828-151356068  | 7.697063333 | 8.65976     |
| Exoc8         | chr8:127414198-127421605  | 7.69631     | 6.943656667 |
| Klhdc1        | chr12:70342818-70384948   | 7.695756667 | 6.656833333 |
| Cd52          | chr4:133649452-133650988  | 7.69218     | 1.055306667 |
| Olfr1373      | chr11:51958094-51959030   | 7.686966667 | 3.347940333 |
| Klhdc4        | chr8:124320207-124353469  | 7.686726667 | 5.224726667 |
| Dnajb5        | chr4:42965965-42971604    | 7.68324     | 17.59011333 |
| Oasl1         | chr5:115373248-115387920  | 7.68215     | 2.463269333 |
| 4921511I17Rik | chr12:12358327-12399281   | 7.681596667 | 1.979691667 |
| Klhdc5        | chr6:147039596-147061300  | 7.680303333 | 9.6735      |
| Ppp2r2d       | chr7:146038068-146074739  | 7.678403333 | 11.50923333 |
| Ces1f         | chr8:95780134-95803635    | 7.67739     | 1.096       |
| A930012L18Rik | chr18:44821318-44835925   | 7.671223333 | 4.361736667 |
| Fam116b       | chr15:89012642-89026905   | 7.669103333 | 6.68443     |
| C1qc          | chr4:136445716-136448829  | 7.65922     | 0.039865333 |
| Osbpl11       | chr16:33185156-33243398   | 7.658683333 | 5.027913333 |
| Mast4         | chr13:103522568-104124572 | 7.65548     | 33.77603333 |
| Cep72         | chr13:74173942-74199733   | 7.650683333 | 4.07398     |
| Erf           | chr7:26027578-26035777    | 7.64943     | 10.28110667 |
| Zscan18       | chr7:13353440-13361007    | 7.646706667 | 5.62376     |



|               |                           |             |             |
|---------------|---------------------------|-------------|-------------|
| Slc9a7        | chrX:19682880-19868890    | 7.639823333 | 9.880116667 |
| Fam115a       | chr6:42622545-42643058    | 7.63456     | 14.8447     |
| Socs6         | chr18:89037271-89063599   | 7.63293     | 8.0819      |
| Mtf1          | chr4:124479792-124527044  | 7.631986667 | 23.00373333 |
| Cxcl16        | chr11:70267735-70273486   | 7.627856667 | 4.659222667 |
| Cep78         | chr19:16030262-16059479   | 7.625236667 | 7.840236667 |
| Bckdk         | chr7:135047586-135053178  | 7.622756667 | 7.039823333 |
| Zbp1          | chr2:173032113-173044423  | 7.622676667 | 4.404516333 |
| Abca7         | chr10:79460359-79478317   | 7.622103333 | 9.863756667 |
| Scrib         | chr15:75877615-75900160   | 7.62144     | 8.22874     |
| Apoe          | chr7:20281592-20284515    | 7.615236667 | 9.333923333 |
| E2f5          | chr3:14578670-14606309    | 7.611396667 | 12.26309    |
| Cwh43         | chr5:73797316-73844664    | 7.60995     | 4.04074     |
| Trim7         | chr11:48639639-48663697   | 7.609706667 | 6.159006667 |
| Nrbf2         | chr10:66729436-66748029   | 7.607103333 | 9.51706     |
| Eno3          | chr11:70470714-70476015   | 7.606663333 | 5.091153333 |
| Zfp646        | chr7:135021214-135029510  | 7.60317     | 5.882466667 |
| Grin2a        | chr16:9577802-9992626     | 7.59941     | 0.207767667 |
| Gm16023       | chr4:154982405-154998864  | 7.593746667 | 1.266458867 |
| Nol6          | chr4:41061459-41071372    | 7.590763333 | 12.21872    |
| Adam15        | chr3:89143561-89153932    | 7.590356667 | 14.5078     |
| Gm14378       | chr8:4248213-4251423      | 7.588003333 | 1.808126667 |
| Nfyc          | chr4:120430039-120504180  | 7.586166667 | 10.85748    |
| Pdlim2        | chr14:70564024-70577479   | 7.583683333 | 4.707376667 |
| A230046K03Rik | chr10:83006685-83059218   | 7.582376667 | 11.26282    |
| Zbtb34        | chr2:33261627-33286844    | 7.581046667 | 6.26479     |
| Nfasc         | chr1:134461266-134638374  | 7.581026667 | 15.5891     |
| Itga9         | chr9:118515826-118810121  | 7.578966667 | 17.73816667 |
| Pank2         | chr2:131088235-131124924  | 7.578166667 | 6.583290667 |
| Lgals7        | chr7:29649404-29651303    | 7.57666     | 33.35253333 |
| Zcchc10       | chr11:53138190-53146803   | 7.575543333 | 4.678722667 |
| Zfp553        | chr7:134376956-134381374  | 7.575483333 | 6.543423333 |
| Ccdc64        | chr5:116099294-116181568  | 7.573976667 | 1.963256    |
| Dlg3          | chrX:97963061-98013749    | 7.573703333 | 9.318686667 |
| BC022687      | chr12:114047185-114054456 | 7.566463333 | 4.166506667 |
| Rbm43         | chr2:51779968-51790529    | 7.56629     | 8.200103333 |
| Slc35a5       | chr16:45139685-45158786   | 7.565986667 | 10.41838667 |
| Bbc3          | chr7:16894931-16903683    | 7.56293     | 4.452706667 |
| Ccdc137       | chr11:120319442-120325667 | 7.557456667 | 10.69064667 |
| Lamc1         | chr1:155066051-155179916  | 7.555933333 | 15.65833333 |
| Fdxr          | chr11:115129338-115138283 | 7.55412     | 8.714933333 |
| Minpp1        | chr19:32560258-32589860   | 7.552963333 | 2.95652     |
| Arntl2        | chr6:146754051-146781168  | 7.552367667 | 3.994998    |
| Adcy6         | chr15:98420420-98438064   | 7.547836667 | 12.94475667 |
| Nedd1         | chr10:92147489-92185163   | 7.54487     | 2.696413333 |
| Csrp2         | chr10:110357231-110376570 | 7.54481     | 5.41611     |
| Hyal1         | chr9:107479282-107482464  | 7.542035333 | 5.952393333 |
| Rwdd3         | chr3:120858319-120874613  | 7.53727     | 4.975182667 |
| Kbtbd7        | chr14:79826317-79830845   | 7.53545     | 4.927243333 |
| Plekha2       | chr8:26149616-26212283    | 7.534186667 | 1.991120667 |
| Ubxn2b        | chr4:6118251-6146935      | 7.532803333 | 8.50046     |
| Vrk1          | chr12:107248472-107315620 | 7.53264     | 6.41547     |

|               |                           |             |             |
|---------------|---------------------------|-------------|-------------|
| Rab35         | chr5:116081995-116097167  | 7.532116667 | 7.097803333 |
| Atg16l1       | chr1:89652585-89689003    | 7.532006667 | 6.106826667 |
| Ccdc28a       | chr10:17933490-17954787   | 7.529499    | 8.68558     |
| Fbf1          | chr11:116003598-116029492 | 7.52818     | 9.389526667 |
| Plekhj1       | chr10:80258843-80261371   | 7.525113333 | 14.31521333 |
| D16Ertd472e   | chr16:78540580-78576933   | 7.519456667 | 11.20881    |
| Zbed4         | chr15:88582140-88614946   | 7.517166667 | 12.83184667 |
| Mtif3         | chr5:147763148-147775373  | 7.51633     | 4.267016667 |
| Akna          | chr4:63028161-63064479    | 7.514806667 | 7.517686667 |
| Dgkq          | chr5:109076062-109089788  | 7.511746667 | 7.847736667 |
| Afap1         | chr5:36235967-36346571    | 7.51008     | 10.92156667 |
| Zfr2          | chr10:80695907-80714868   | 7.507383333 | 6.944183333 |
| Ano1          | chr7:151774453-151924497  | 7.50532     | 3.155884333 |
| Pnkp          | chr7:52112550-52118299    | 7.504153333 | 2.76574     |
| Gsta2         | chr9:78178826-78194952    | 7.503610667 | 16.827      |
| Tmem135       | chr7:96288230-96487297    | 7.503296667 | 9.259246667 |
| Mylip         | chr13:45485110-45507309   | 7.49548     | 13.10765333 |
| Gadd45gip1    | chr8:87356180-87359381    | 7.483383333 | 14.69061567 |
| Pam           | chr1:99717670-99992209    | 7.477663333 | 13.95263333 |
| Ndn12         | chr7:72016535-72017926    | 7.477486667 | 6.717513333 |
| Zfp790        | chr7:30601090-30617061    | 7.47654     | 7.101817667 |
| Zbtb5         | chr4:45004114-45025284    | 7.475773333 | 6.539566667 |
| Tmem141       | chr2:25475585-25477525    | 7.475333333 | 8.492686667 |
| Mlst8         | chr17:24610494-24616023   | 7.473296667 | 4.174943333 |
| Zfp142        | chr1:74611701-74634602    | 7.473103333 | 7.628146667 |
| Irak3         | chr10:119578709-119638593 | 7.473066667 | 0.088578833 |
| Topbp1        | chr9:103207656-103252757  | 7.471596667 | 12.16785667 |
| Ephb2         | chr4:136209524-136391850  | 7.46736     | 14.4908     |
| Rabepk        | chr2:34634185-34655432    | 7.466626667 | 9.32531     |
| Tbcc          | chr17:47027569-47029412   | 7.46561     | 7.095353333 |
| Tbc1d13       | chr2:29989390-30007533    | 7.462546667 | 4.448593333 |
| Msh3          | chr13:92981835-93124958   | 7.461926667 | 6.142503333 |
| Nat2          | chr8:70018773-70026477    | 7.461753333 | 1.704963667 |
| Ddx18         | chr1:123450411-123464557  | 7.460483333 | 5.86206     |
| Fbxo4         | chr15:3913563-3929573     | 7.459356667 | 2.234324667 |
| Dynlt1e       | chr17:6648832-6655064     | 7.45448     | 7.10299     |
| Smyd2         | chr1:191704370-191746167  | 7.453673333 | 12.57579333 |
| 4930500J02Rik | chr2:104399340-104411586  | 7.452466667 | 1.593138333 |
| Rabl3         | chr16:37539979-37572471   | 7.452068667 | 11.46143667 |
| 5730455P16Rik | chr11:80173993-80191517   | 7.45098     | 6.03863     |
| Me1           | chr9:86474969-86589947    | 7.4496      | 21.29476667 |
| Smarcd1       | chr15:99532717-99544426   | 7.448293333 | 4.13256     |
| Nagpa         | chr16:5195372-5204105     | 7.448103333 | 14.43003    |
| Ctf1          | chr7:134856249-134861699  | 7.448046667 | 14.08434333 |
| Zcchc3        | chr2:152237691-152240780  | 7.447576667 | 15.11680567 |
| Pcca          | chr14:122933549-123289166 | 7.44696     | 12.87586    |
| Zfp503        | chr14:22803183-22808823   | 7.442603333 | 10.72102333 |
| Mier2         | chr10:79002989-79017836   | 7.440566667 | 3.85329     |
| Acot8         | chr2:164618267-164630381  | 7.436256667 | 1.44887     |
| Zfp830        | chr11:82577846-82581124   | 7.435953333 | 9.660813333 |
| Cox16         | chr12:82571690-82586097   | 7.435743333 | 11.06978667 |
| BC030307      | chr10:86168555-86239588   | 7.434346667 | 5.50036     |

|               |                           |             |             |
|---------------|---------------------------|-------------|-------------|
| Grhl1         | chr12:25257151-25302256   | 7.43427     | 12.87716667 |
| Msx2          | chr13:53562249-53568149   | 7.433266667 | 43.585      |
| Sec61g        | chr11:16401640-16408487   | 7.431523333 | 7.494026667 |
| Preb          | chr5:31254039-31262734    | 7.4257      | 7.263256667 |
| Shkbp1        | chr7:28127151-28141027    | 7.425676667 | 12.16265333 |
| Zfp747        | chr7:134516050-134519564  | 7.42406     | 5.00279     |
| Ino80c        | chr18:24263261-24280320   | 7.423856667 | 4.318888067 |
| Bcam          | chr7:20341486-20355881    | 7.420223333 | 13.23816667 |
| Atg4d         | chr9:21069742-21078812    | 7.419233333 | 4.309916667 |
| D630013N20Rik | chr10:70063796-70118711   | 7.418603333 | 0.443875333 |
| Wdr91         | chr6:34830425-34860831    | 7.416883333 | 6.199273333 |
| Ampd2         | chr3:107876979-107889545  | 7.41678     | 8.07808     |
| Olig1         | chr16:91270013-91272184   | 7.41503     | 2.423125    |
| Tbc1d30       | chr10:120700875-120748245 | 7.413476667 | 11.5917     |
| Uba6          | chr5:86539753-86601768    | 7.413046667 | 7.73752     |
| Elovl4        | chr9:83672298-83699912    | 7.411843333 | 22.96227    |
| 9230112J17Rik | chr9:60371773-60393689    | 7.411386667 | 0.602056667 |
| Mpzl2         | chr9:44850426-44862126    | 7.41073     | 19.95165    |
| Zfp507        | chr7:36557368-36588008    | 7.408203333 | 10.57222667 |
| Chn1          | chr2:73448716-73613403    | 7.4062      | 4.46185     |
| Armc9         | chr1:88051354-88174859    | 7.40138     | 2.442496667 |
| Zfp518a       | chr19:40969194-40992437   | 7.400666667 | 13.26183333 |
| Lims1         | chr10:57786213-57887439   | 7.394556667 | 18.55831667 |
| 8430429K09Rik | chr11:3352439-3379834     | 7.39214     | 2.385920667 |
| Gm14477       | chrX:10882780-10883098    | 7.390323333 | 0.197470667 |
| Lonrf1        | chr8:37279117-37312570    | 7.380723333 | 13.37006333 |
| Hyi           | chr4:118032603-118035349  | 7.377843333 | 8.85483     |
| Synj2         | chr17:5941279-6044290     | 7.377556667 | 11.28143333 |
| Tbc1d22b      | chr17:29686746-29743753   | 7.373803333 | 9.29333     |
| Mall          | chr2:127530125-127555633  | 7.369546667 | 17.1617     |
| Zfp574        | chr7:25862223-25868511    | 7.368493333 | 3.768803333 |
| Uevld         | chr7:54178585-54213888    | 7.365603333 | 3.559187667 |
| Trim3         | chr7:112758983-112782013  | 7.363863333 | 3.097961333 |
| Dcaf10        | chr4:45354972-45392594    | 7.362963333 | 6.126366667 |
| Fam86         | chr16:5244247-5256049     | 7.359546667 | 11.41902333 |
| Nlrx1         | chr9:44060795-44076682    | 7.357096667 | 5.871673333 |
| Naa16         | chr14:79734313-79790475   | 7.352993333 | 10.09892    |
| Chrnbl        | chr11:69597537-69609439   | 7.35204     | 37.72336667 |
| Rnmt          | chr18:68460008-68484506   | 7.351413333 | 10.72532333 |
| C87436        | chr6:86388391-86420381    | 7.35118     | 4.705526667 |
| Socs7         | chr11:97223864-97259856   | 7.34867     | 11.57451333 |
| Thoc1         | chr18:9958177-9995482     | 7.344643333 | 9.393536667 |
| Lrrc40        | chr3:157699666-157731442  | 7.339026667 | 4.207513333 |
| Blnk          | chr19:41003416-41069025   | 7.337970333 | 5.15445     |
| Stk33         | chr7:116422729-116582567  | 7.332066667 | 3.335282667 |
| Fam82b        | chr4:19502212-19534079    | 7.331806667 | 4.6002      |
| Zswim6        | chr13:108514696-108680258 | 7.328466667 | 7.090936667 |
| Zfp60         | chr7:28516427-28536708    | 7.32642     | 12.99801333 |
| Ormdl1        | chr1:53353938-53367089    | 7.325723333 | 5.147226667 |
| Etohd2        | chr13:59871326-59875041   | 7.324756667 | 1.425194333 |
| Tigd2         | chr6:59158863-59162027    | 7.323991    | 3.224692333 |
| Ddx54         | chr5:121063138-121078601  | 7.322926667 | 13.1493     |

|               |                           |             |             |
|---------------|---------------------------|-------------|-------------|
| Atg4c         | chr4:98860624-98926478    | 7.319736667 | 11.29284667 |
| Dnali1        | chr4:124732582-124742901  | 7.318696667 | 5.359647    |
| Katnal1       | chr5:149683159-149740223  | 7.31744     | 4.329006667 |
| N6amt1        | chr16:87354429-87368894   | 7.316953333 | 10.69995    |
| Pdzrn3        | chr6:101099600-101327891  | 7.315303333 | 3.984276667 |
| Vps8          | chr16:21423190-21644753   | 7.314816667 | 3.540853333 |
| Sip1          | chr12:60114379-60128975   | 7.313186667 | 2.69774     |
| Cdk14         | chr5:4803384-5380251      | 7.312266667 | 6.714283333 |
| BC003266      | chr4:126921027-126925053  | 7.310896333 | 4.094153333 |
| Cinp          | chr12:112110819-112127355 | 7.298323333 | 3.70031     |
| Pnmal2        | chr7:17530030-17534177    | 7.298166667 | 13.14732667 |
| Olfr57        | chr10:78497467-78498547   | 7.297929333 | 0.048937    |
| Rab31         | chr17:66001065-66122092   | 7.296923333 | 2.464636667 |
| 1700030J22Rik | chr8:119493498-119502843  | 7.296023333 | 4.565763333 |
| Tm7sf3        | chr6:146550797-146583114  | 7.29302     | 4.455013333 |
| 5430407P10Rik | chr2:6019545-6051231      | 7.290916667 | 15.23193333 |
| 2810021B07Rik | chr13:17787246-17790939   | 7.289586667 | 5.241006667 |
| Hspbp1        | chr7:4612122-4636565      | 7.289356667 | 15.53545667 |
| Utp15         | chr13:99016799-99032947   | 7.287113333 | 3.704103333 |
| Bcs1l         | chr1:74634934-74639017    | 7.28693     | 4.445535667 |
| Tmem41b       | chr7:117115700-117129744  | 7.286373333 | 11.5219     |
| Mycbpap       | chr11:94362660-94382816   | 7.280216667 | 4.751246667 |
| Caps2         | chr10:111602731-111653611 | 7.27876     | 1.543116667 |
| Deptor        | chr15:54944037-55085757   | 7.276926667 | 10.1063     |
| Tmem186       | chr16:8633823-8637794     | 7.27567     | 2.515238    |
| 2310004I24Rik | chr11:66851381-66866120   | 7.27469     | 11.41449    |
| Myo1c         | chr11:75465010-75488136   | 7.27369     | 6.499596667 |
| Tnfrsf10b     | chr14:70167278-70184218   | 7.272646667 | 2.26947     |
| Wdr20a        | chr12:111976158-112033238 | 7.266466667 | 20.87626667 |
| Rab4a         | chr8:126329895-126359191  | 7.262073333 | 6.026573333 |
| Afg3l1        | chr8:126001761-126027816  | 7.260646667 | 3.99131     |
| Krtap3-1      | chr11:99427340-99427944   | 7.257626667 | 20.82166667 |
| 6330439K17Rik | chr2:144296292-144353134  | 7.251203333 | 2.182083333 |
| Fam53b        | chr7:139903766-140004879  | 7.24802     | 20.42103333 |
| Arf2          | chr11:103828184-103846650 | 7.246596667 | 7.51884     |
| A430071A18Rik | chr11:119682124-119695679 | 7.245783667 | 1.272726333 |
| Rpgrip1l      | chr8:93740928-93837121    | 7.242073333 | 9.03555     |
| Ovca2         | chr11:74989444-74992310   | 7.238743333 | 13.55004667 |
| Zfp933        | chr4:147197094-147222484  | 7.238566667 | 4.920026667 |
| Zfp40         | chr17:23310835-23330195   | 7.23663     | 4.318783333 |
| Kbtbd4        | chr2:90744942-90750717    | 7.235733333 | 16.34886667 |
| Fa2h          | chr8:113869037-113917721  | 7.23218     | 18.29249667 |
| Ldhd          | chr8:114150170-114154222  | 7.231416667 | 9.28224     |
| D4Bwg0951e    | chr4:80556589-80600205    | 7.23023     | 7.1531      |
| Dbt           | chr3:116215996-116252899  | 7.22673     | 4.736167167 |
| Coasy         | chr11:100943938-100947933 | 7.225653333 | 11.76588667 |
| Prmt7         | chr8:108734953-108775594  | 7.22492     | 6.215843333 |
| Bbs5          | chr2:69485311-69505626    | 7.22379     | 6.56608     |
| Suv420h2      | chr7:4691728-4699116      | 7.219856667 | 11.27606667 |
| Tmem35        | chrX:130829763-130840508  | 7.215343333 | 17.38507667 |
| Myb           | chr10:20844735-20880790   | 7.205753333 | 28.06916667 |
| Ccdc149       | chr5:52765889-52862782    | 7.200663333 | 5.365413333 |

|               |                           |             |             |
|---------------|---------------------------|-------------|-------------|
| Tpra1         | chr6:88852244-88862234    | 7.19944     | 9.471363333 |
| Prps1l3       | chr12:58331398-58343155   | 7.19756     | 7.85981     |
| Notch2        | chr3:97817460-97954290    | 7.196416667 | 9.728066667 |
| Zswim3        | chr2:164630613-164647627  | 7.195896667 | 5.48035     |
| Orc5          | chr5:21992306-22056149    | 7.195416667 | 3.04349     |
| Cacnb1        | chr11:97864214-97883941   | 7.19178     | 22.03811    |
| B430319G15Rik | chr9:92433638-92437707    | 7.191286667 | 1.250464667 |
| Traf3ip1      | chr1:93391244-93425884    | 7.189206667 | 9.669343333 |
| Papd4         | chr13:93917354-93962238   | 7.188966667 | 7.218943333 |
| Srsf12        | chr4:33295965-33320315    | 7.18632     | 2.01509     |
| Ttc39c        | chr18:12802041-12895561   | 7.18397     | 8.035336667 |
| Ino80b        | chr6:83071821-83075023    | 7.180901667 | 8.404496667 |
| 1300018J18Rik | chr15:88919536-88930770   | 7.17666     | 10.06680333 |
| Zfp143        | chr7:117205215-117238906  | 7.174993333 | 7.614783333 |
| Hdac6         | chrX:7507247-7525015      | 7.172173333 | 4.300916667 |
| Rnaseh2c      | chr19:5601872-5602959     | 7.16851     | 15.83648667 |
| Fiz1          | chr7:4958657-4966330      | 7.164033333 | 6.19158     |
| Vangl2        | chr1:173934501-173957399  | 7.15912     | 23.28708333 |
| Tmem181c-ps   | chr17:6635807-6646630     | 7.1528      | 7.02839     |
| Usp35         | chr7:104457889-104474474  | 7.148956667 | 8.642796667 |
| Recql         | chr6:142298861-142335607  | 7.14095     | 9.337433333 |
| Mtmr14        | chr6:113187836-113231386  | 7.14037     | 5.50221     |
| Asnsd1        | chr1:53401487-53409543    | 7.140316667 | 9.80901     |
| Gng10         | chr4:59048027-59054771    | 7.13999     | 11.50719667 |
| Rnf41         | chr10:127848671-127878497 | 7.13919     | 16.00873333 |
| Ak1           | chr2:32477277-32490578    | 7.138233333 | 7.41492     |
| Hist1h2af     | chr13:23625779-23626172   | 7.138226667 | 3.376276667 |
| Atr           | chr9:95758015-95852063    | 7.138       | 10.09213333 |
| Fam78b        | chr1:168931547-169021433  | 7.13051     | 6.354271333 |
| Scarna6       | chr1:89681145-89681393    | 7.129356667 | 0           |
| 2210404J11Rik | chr17:15178575-15201196   | 7.125213333 | 9.467103333 |
| Rpl7l1        | chr17:46910855-46919605   | 7.121116667 | 10.87226667 |
| Kctd1         | chr18:15127193-15309955   | 7.119963333 | 34.72806667 |
| Rfx1          | chr8:86590734-86620891    | 7.115866667 | 5.729703333 |
| Amd1          | chr10:40007263-40021994   | 7.11316778  | 13.73159877 |
| Mapk7         | chr11:61302313-61307705   | 7.107023333 | 9.824353333 |
| Gm10033       | chr8:71894923-71919443    | 7.103303333 | 8.261563333 |
| Efs           | chr14:55535379-55545625   | 7.101196667 | 3.549233333 |
| Gm5113        | chr7:30954940-30965228    | 7.096216667 | 8.546393333 |
| Serpinb2      | chr1:109407999-109422177  | 7.096086667 | 35.01394    |
| Btrc          | chr19:45438223-45607833   | 7.095323333 | 4.832796667 |
| Tmco3         | chr8:13288012-13322924    | 7.094733333 | 6.502606667 |
| Gm5129        | chr5:30061873-30062476    | 7.093903333 | 2.935443333 |
| 2210404O07Rik | chr10:80855808-80857824   | 7.093007333 | 80.54001667 |
| Rbm14         | chr19:4800924-4811634     | 7.089246667 | 5.400653333 |
| Timm22        | chr11:76220668-76229814   | 7.088593333 | 8.597186667 |
| Fadd          | chr7:151764227-151768341  | 7.088026667 | 2.275624667 |
| Mus81         | chr19:5482839-5488336     | 7.086923333 | 4.464866667 |
| Dusp4         | chr8:35870663-35882948    | 7.07394     | 7.33669     |
| Tbccd1        | chr16:22813287-22857642   | 7.072823333 | 7.118433333 |
| Slc35a2       | chrX:7461369-7471618      | 7.06982     | 9.54751     |
| Faah          | chr4:115669260-115690507  | 7.068813333 | 14.28319333 |

|                |                           |             |             |
|----------------|---------------------------|-------------|-------------|
| Tenc1          | chr15:101933418-101946832 | 7.068033333 | 3.69034     |
| Sigmar1        | chr4:41685368-41688186    | 7.0657      | 13.12407667 |
| Cd247          | chr1:167718811-167801284  | 7.062933333 | 1.15632     |
| Uba7           | chr9:107877897-107886387  | 7.06136     | 2.497262667 |
| Tmem2          | chr19:21852831-21932817   | 7.058956667 | 14.81225667 |
| lft27          | chr15:77989892-78004538   | 7.054973333 | 13.29760667 |
| Mtmr11         | chr3:95965892-95975641    | 7.054493333 | 3.054718    |
| ltpkc          | chr7:27992188-28013616    | 7.053196667 | 16.8677     |
| Uap1l1         | chr2:25217011-25221146    | 7.049403333 | 11.3314     |
| Tpk1           | chr6:43295005-43616174    | 7.040463333 | 8.198666667 |
| Pygo2          | chr3:89234758-89239050    | 7.03977     | 9.031556667 |
| 2810047C21Rik1 | chr7:10034292-10041283    | 7.036143333 | 7.260566667 |
| Prr3           | chr17:36109483-36116770   | 7.0331      | 7.53756     |
| Crtap          | chr9:114284248-114299830  | 7.032186667 | 2.888492    |
| 1190007I07Rik  | chr10:82082595-82085973   | 7.031566667 | 2.444766667 |
| Ralgps2        | chr1:158734296-158869757  | 7.031313333 | 13.52874333 |
| Fxc1           | chr7:112789053-112790359  | 7.02705     | 7.63047     |
| Tti1           | chr2:157807538-157835096  | 7.025506667 | 8.89512     |
| Rpap3          | chr15:97505535-97536253   | 7.02458     | 5.374956667 |
| Crat           | chr2:30255995-30271268    | 7.020593333 | 6.010186667 |
| Nbeal2         | chr9:110527292-110556665  | 7.020213333 | 16.23753333 |
| Nom1           | chr5:29761206-29778709    | 7.019546667 | 6.816923333 |
| Gps1           | chr11:120645585-120650416 | 7.01909     | 8.596266667 |
| Ppp2r5d        | chr17:46819939-46841951   | 7.013536667 | 20.7607     |
| Msrb2          | chr2:19293262-19316597    | 7.01284     | 14.79909    |
| Alg10b         | chr15:90054741-90060985   | 7.01059     | 8.934726667 |
| Chl1           | chr6:103460869-103683029  | 7.008436667 | 18.1268     |
| Arhgap39       | chr15:76554414-76648600   | 7.00805     | 11.74631333 |
| Gyltl1b        | chr2:92205202-92211193    | 7.0044      | 27.86253333 |
| Mgat1          | chr11:49057692-49076526   | 7.004073333 | 7.048443333 |
| Nfrkb          | chr9:31193776-31228918    | 7.003483333 | 15.93555333 |
| 2810454H06Rik  | chr6:134847978-134850803  | 7.003353333 | 1.10505     |
| Mgat5          | chr1:129101562-129379549  | 6.99375     | 21.2503     |
| Znrf3          | chr11:5176331-5344850     | 6.990903333 | 13.02116667 |
| Fbxw17         | chr13:50513245-50529138   | 6.990593333 | 3.16291     |
| Nup133         | chr8:126421022-126473165  | 6.989703333 | 4.03384     |
| Zmym1          | chr4:126724337-126738376  | 6.988766667 | 11.84899    |
| Phf7           | chr14:32050881-32064404   | 6.98625     | 2.85789     |
| Cyp4f16        | chr17:32673573-32688742   | 6.98447     | 13.31818333 |
| Cpt1c          | chr7:52214741-52230221    | 6.983603333 | 7.380416667 |
| Ormdl3         | chr11:98442607-98448559   | 6.978483333 | 15.140606   |
| Zfyve20        | chr6:92136705-92164805    | 6.973843333 | 14.90396333 |
| Dbr1           | chr9:99476217-99484762    | 6.971873333 | 3.345383333 |
| Apobec2        | chr17:48558555-48572053   | 6.970396    | 0.361637933 |
| Rufy2          | chr10:62442970-62481490   | 6.96239     | 6.27727     |
| Galnt2         | chr8:126755293-126869622  | 6.959369667 | 7.93946     |
| lqcg           | chr16:33014355-33056272   | 6.959256667 | 4.80083     |
| Mamstr         | chr7:52895346-52901138    | 6.959183333 | 3.085948    |
| Hcfc2          | chr10:82161751-82204137   | 6.958616667 | 3.493376667 |
| Fig4           | chr10:40907977-41023047   | 6.954083333 | 14.78876    |
| Fam134c        | chr11:100957635-100981157 | 6.953066667 | 5.800143333 |
| Ap1g2          | chr14:55717686-55725430   | 6.95207     | 7.443016667 |

|               |                           |             |             |
|---------------|---------------------------|-------------|-------------|
| Fam46a        | chr9:85214045-85220757    | 6.951963333 | 6.908456667 |
| Bcar3         | chr3:122122697-122233100  | 6.951286667 | 3.729046667 |
| 1700123O20Rik | chr14:55305007-55309579   | 6.950006667 | 8.265013333 |
| Cpeb3         | chr19:37095780-37281783   | 6.94697     | 9.318636667 |
| Celsr1        | chr15:85729187-85864207   | 6.94533     | 8.920853333 |
| Chd1l         | chr3:97364670-97414113    | 6.943906667 | 2.637406667 |
| N4bp2         | chr5:66154759-66218023    | 6.941186667 | 8.969696667 |
| Hsd1l         | chr8:122085877-122099100  | 6.94097     | 5.310033333 |
| Il28b         | chr7:29307854-29309341    | 6.94059     | 0           |
| 1700052N19Rik | chr10:5891400-5913936     | 6.940036667 | 4.429093333 |
| Fcgbp         | chr7:28856254-28905883    | 6.937966667 | 8.82604     |
| Gm14403       | chr2:177282930-177297016  | 6.935443333 | 0.974245333 |
| A930015D03Rik | chr17:36131448-36175119   | 6.928143333 | 6.982530333 |
| 1700020D05Rik | chr19:5502768-5503787     | 6.92789     | 1.574706667 |
| Acot7         | chr4:151552208-151645964  | 6.92497     | 26.2226     |
| Men1          | chr19:6334978-6340894     | 6.922866667 | 10.01948333 |
| Uhrf1bp1      | chr17:27993451-28036985   | 6.921166667 | 4.985423333 |
| St3gal6       | chr16:58470654-58523425   | 6.921046667 | 7.67098     |
| Fam65a        | chr8:108129128-108146118  | 6.92087     | 6.398493333 |
| Tceal3        | chrX:133200913-133202916  | 6.920823333 | 2.358682667 |
| Slc10a7       | chr8:81033233-81257904    | 6.92043     | 5.198873333 |
| Hps5          | chr7:54015835-54051251    | 6.920406667 | 8.485546667 |
| Slc35e2       | chr4:154975524-154997450  | 6.918483333 | 11.64627    |
| Zw10          | chr9:48863685-48886878    | 6.91731     | 7.882423333 |
| Rab8b         | chr9:66691470-66767512    | 6.915613333 | 5.654506667 |
| Prosapip1     | chr2:130458574-130468539  | 6.915086667 | 2.420064667 |
| Gm166         | chr7:134725896-134732109  | 6.914833333 | 4.571340003 |
| Slc30a7       | chr3:115641890-115710324  | 6.912433333 | 6.945136667 |
| AK010878      | chr12:103991484-103996020 | 6.91072     | 9.868196667 |
| Lrsam1        | chr2:32780734-32816775    | 6.908366667 | 9.489546667 |
| Ftsj1         | chrX:7815793-7829532      | 6.902313333 | 4.98495     |
| 9430016H08Rik | chr1:57463391-57472802    | 6.900736667 | 3.199973333 |
| Efcab2        | chr1:180336011-180413380  | 6.899856667 | 2.207000767 |
| Cep97         | chr16:55900000-55934961   | 6.895426667 | 6.92422     |
| Ppp1r37       | chr7:20116315-20147747    | 6.890086667 | 9.67696     |
| Cyyr1         | chr16:85456489-85550618   | 6.888026667 | 1.290813333 |
| Sec23a        | chr12:60059370-60113004   | 6.88777     | 7.119258    |
| Abcg1         | chr17:31194638-31254926   | 6.88726     | 9.695216667 |
| Yipf4         | chr17:74888832-74899617   | 6.885106667 | 7.061013333 |
| Ptpn13        | chr5:103854210-104027380  | 6.88153     | 14.99983333 |
| Thbs1         | chr2:117937657-117952869  | 6.880056667 | 16.69218667 |
| Hirip3        | chr7:134005485-134008636  | 6.876323333 | 9.299863333 |
| Dem1          | chr4:120593806-120597610  | 6.875566667 | 2.69644     |
| Mex3b         | chr7:90015842-90020086    | 6.87141     | 1.765262667 |
| Flna          | chrX:71468799-71491873    | 6.870333333 | 15.63003333 |
| 1110019D14Rik | chr6:13821568-13846421    | 6.867996667 | 8.936533333 |
| Cdc42bpg      | chr19:6306456-6325652     | 6.867133333 | 12.82492667 |
| Tmem201       | chr4:149089492-149112145  | 6.865416667 | 8.111943333 |
| Tmem181c-ps   | chr17:6814820-6825643     | 6.860446667 | 7.104303333 |
| Scai          | chr2:38921734-39046250    | 6.8601      | 8.476756667 |
| D10Bwg1379e   | chr10:18307816-18463564   | 6.857283333 | 8.406543333 |
| Kctd6         | chr14:9046661-9056083     | 6.8563      | 3.82835     |

|               |                           |             |             |
|---------------|---------------------------|-------------|-------------|
| Nudt13        | chr14:21113911-21136797   | 6.854713333 | 3.750545    |
| Ap4e1         | chr2:126834446-126895550  | 6.854336667 | 4.72663     |
| Fgfbp3        | chr19:36992039-36994089   | 6.85416     | 0.693109    |
| Letm2         | chr8:26688961-26707959    | 6.85329     | 5.686776667 |
| Tssc1         | chr12:29436692-29552356   | 6.85317     | 7.342566667 |
| Rpp30         | chr19:36158205-36179263   | 6.850346667 | 9.836175333 |
| Cdk20         | chr13:64533860-64541029   | 6.849393333 | 2.593038633 |
| BC067068      | chr10:105200240-105278436 | 6.844293333 | 9.289156667 |
| Mzt2          | chr16:15848533-15863415   | 6.84342     | 6.977363333 |
| Uchl4         | chr9:64083007-64084169    | 6.842786667 | 4.422456667 |
| Znhit2-ps     | chr19:6061206-6062468     | 6.841673333 | 4.971941667 |
| 2310010J17Rik | chr7:97273345-97278446    | 6.841523333 | 3.250608667 |
| Kptn          | chr7:16705224-16712865    | 6.840526667 | 4.42985     |
| Tmem220       | chr11:66838655-66848292   | 6.838123333 | 3.175770333 |
| Zfp606        | chr7:13063653-13081584    | 6.837243333 | 4.514463333 |
| Mthfr         | chr4:147413185-147433671  | 6.830753333 | 9.502046667 |
| Thada         | chr17:84589395-84865548   | 6.828696667 | 9.51793     |
| AI316807      | chr8:23573085-23587351    | 6.82839     | 9.527883333 |
| Itpr2         | chr6:146060001-146450434  | 6.82814     | 9.050853333 |
| Gm10791       | chr16:84972455-84979696   | 6.827206667 | 1.453972667 |
| Ogfod1        | chr8:96561097-96591822    | 6.82702     | 9.33157     |
| Cln8          | chr8:14888535-14901719    | 6.823946667 | 6.87902     |
| Fance         | chr17:28450474-28463519   | 6.823827333 | 3.54438     |
| Tjap1         | chr17:46394799-46419975   | 6.822013333 | 2.589266667 |
| Sh3bp5l       | chr11:58144219-58161230   | 6.819633333 | 8.840096667 |
| Aptx          | chr4:40629110-40650220    | 6.81951     | 7.45342     |
| Qsox1         | chr1:157625284-157660029  | 6.81671     | 11.33770333 |
| Ankrd28       | chr14:32513200-32643601   | 6.814773333 | 10.44030667 |
| Fut9          | chr4:25536479-25727150    | 6.81343     | 6.69052     |
| Zfp867        | chr11:59274698-59285976   | 6.806456667 | 3.5175524   |
| Acot2         | chr12:85328810-85334825   | 6.80645     | 6.589763333 |
| Erc6          | chr14:33326706-33394175   | 6.805963333 | 8.66608     |
| Gstm7         | chr3:107729251-107734663  | 6.803546667 | 4.51327     |
| Mrpl11        | chr19:4962305-4966995     | 6.79907     | 3.295361333 |
| 2410042D21Rik | chr2:112219367-112254394  | 6.793226667 | 10.52697    |
| Cd63          | chr10:128345974-128349874 | 6.791406667 | 13.41070333 |
| 1700021C14Rik | chr3:88086681-88100760    | 6.78714     | 4.73707     |
| Ube2e2        | chr14:19406090-19726141   | 6.784993333 | 4.193663333 |
| Apeh          | chr9:107987744-107996811  | 6.779706667 | 4.796696667 |
| Adam1a        | chr5:121968612-121971704  | 6.778196667 | 2.66825     |
| Agtrap        | chr4:147451169-147462173  | 6.775786667 | 12.16391667 |
| Cxcr7         | chr1:92100577-92112863    | 6.774884667 | 3.556056667 |
| Gm9781        | chr2:121854318-121879367  | 6.77237     | 3.813260469 |
| Man2c1        | chr9:56978583-56990017    | 6.76421     | 15.84549    |
| Actr6         | chr10:89174717-89195040   | 6.763093333 | 2.771316667 |
| Ell2          | chr13:75844931-75909806   | 6.76253     | 18.95993333 |
| Snx16         | chr3:10417816-10440124    | 6.762293333 | 4.146233333 |
| Dfna5         | chr6:50157401-50211768    | 6.762183333 | 16.66183333 |
| Pkd1l3        | chr8:112138416-112196492  | 6.757506667 | 4.661209333 |
| Smcr7l        | chr15:80064509-80083801   | 6.7564      | 3.984444333 |
| Rac3          | chr11:120582781-120585283 | 6.756316667 | 8.616066667 |
| Ttc12         | chr9:49245065-49294330    | 6.754003333 | 1.032973    |



|               |                           |             |             |
|---------------|---------------------------|-------------|-------------|
| Tnnt2         | chr1:137732962-137748838  | 6.753723333 | 1.248671667 |
| Secisbp2      | chr13:51747082-51779015   | 6.753446667 | 7.060463333 |
| Ttll3         | chr6:113339253-113364565  | 6.751983333 | 10.30612333 |
| Gemin8        | chrX:162608411-162628444  | 6.746       | 2.124683333 |
| Zfp185        | chrX:70232677-70276882    | 6.74576     | 9.05388     |
| Dll1          | chr17:15504317-15512787   | 6.743793333 | 35.02093333 |
| Fscn1         | chr5:143722033-143734868  | 6.742963333 | 7.231483333 |
| Cnot8         | chr11:57917654-57932096   | 6.74294     | 9.886936667 |
| Camk2n2       | chr16:20619287-20621351   | 6.741476667 | 16.65499333 |
| Irgm1         | chr11:48678750-48684848   | 6.740726667 | 1.80926     |
| Rrs1          | chr1:9535488-9537536      | 6.740416667 | 16.35493333 |
| Wwp1          | chr4:19536819-19636140    | 6.738976667 | 10.28891667 |
| H2-T22        | chr17:36175353-36179647   | 6.738582932 | 0.444810704 |
| Car2          | chr3:14886425-14900770    | 6.73653     | 14.16968333 |
| Zfp629        | chr7:134750548-134757947  | 6.735803333 | 7.104943333 |
| Ydjc          | chr16:17147059-17148950   | 6.73252     | 2.848083333 |
| Ddx3y         | chrY:597157-623056        | 6.730823333 | 5.4250861   |
| AU040972      | chr11:79295224-79297533   | 6.72867     | 27.72902    |
| Decr1         | chr4:15844386-15872654    | 6.726606667 | 8.3512      |
| Armc7         | chr11:115336990-115351780 | 6.726393333 | 3.710773333 |
| Setbp1        | chr18:78947116-79306130   | 6.724716667 | 2.83614     |
| Wdr62         | chr7:31025156-31065440    | 6.72452     | 9.289923333 |
| Slc35e1       | chr8:75001893-75016513    | 6.721113333 | 7.745803333 |
| F2r           | chr13:96371743-96388388   | 6.72015     | 21.16496667 |
| Fmn2          | chr1:176431955-176752860  | 6.71986     | 16.182      |
| Inpp1         | chr1:52846263-52874532    | 6.718366667 | 3.39286     |
| Gle1          | chr2:29790928-29814952    | 6.717573333 | 7.05179     |
| B230216N24Rik | chr1:99927699-99944370    | 6.717073333 | 0.845962333 |
| Parp3         | chr9:106372683-106378982  | 6.713823333 | 3.55678     |
| Tmem64        | chr4:15192966-15213900    | 6.71057     | 16.25498333 |
| Calr4         | chr4:108908236-108926853  | 6.710238333 | 0.054709767 |
| D630041G03Rik | chr7:4418846-4422486      | 6.70738     | 1.57408     |
| 1810048J11Rik | chr12:73637343-73681200   | 6.701253333 | 4.539376667 |
| Casc1         | chr6:145123391-145159490  | 6.69946     | 4.201879333 |
| Aste1         | chr9:105297721-105308086  | 6.69737     | 9.758002667 |
| Wdr36         | chr18:32996878-33026074   | 6.696283333 | 9.532666667 |
| H2afy2        | chr10:61201394-61246612   | 6.690546667 | 24.91509    |
| Rbm11         | chr16:75593135-75603070   | 6.68863     | 0.7699429   |
| 4921511H03Rik | chr5:7304163-7311491      | 6.686373333 | 0.40247     |
| Lrch4-sap25   | chr5:138070350-138084124  | 6.68535     | 2.180077333 |
| Ctnnal1       | chr4:56823806-56878083    | 6.685143333 | 17.94786667 |
| Samhd1        | chr2:156923264-156960958  | 6.683513333 | 7.92631     |
| Ddx55         | chr5:125002872-125019669  | 6.67815     | 17.53095667 |
| Tnip2         | chr5:34838744-34856628    | 6.677486667 | 11.1704     |
| Hist1h2ad     | chr13:23666339-23666732   | 6.676543333 | 3.701996667 |
| Sgsm1         | chr5:113672239-113739806  | 6.676476667 | 6.400437667 |
| Il7           | chr3:7572076-7613427      | 6.674163333 | 0.063346733 |
| Dixdc1        | chr9:50470857-50536089    | 6.670686667 | 11.84989    |
| Notum         | chr11:120515102-120522151 | 6.669826667 | 1.898644    |
| Pelp1         | chr11:70206382-70223533   | 6.667866667 | 5.211603333 |
| 1110005A03Rik | chr11:116704828-116711054 | 6.66656     | 10.94588333 |
| BC029214      | chr2:25315007-25316614    | 6.66266     | 13.55941    |

|               |                           |             |             |
|---------------|---------------------------|-------------|-------------|
| 2700023E23Rik | chr5:74489107-74490361    | 6.66212     | 3.54916     |
| 6230400D17Rik | chr14:21521233-21522321   | 6.661556333 | 7.106993333 |
| Samd8         | chr14:22569752-22617947   | 6.660833333 | 11.39857333 |
| 6330418K02Rik | chr5:138705272-138707889  | 6.657673333 | 3.781430667 |
| Syne1         | chr10:5151833-5326342     | 6.65734     | 11.64470667 |
| Irak1bp1      | chr9:82723412-82741295    | 6.655433333 | 7.032689    |
| Clic3         | chr2:25312362-25314292    | 6.652753333 | 14.15091333 |
| Pus10         | chr11:23565673-23632876   | 6.65204     | 8.63433     |
| Kcnab2        | chr4:151764848-151851658  | 6.64978     | 5.161553333 |
| A530054K11Rik | chr13:67717937-67738690   | 6.643336667 | 6.459956667 |
| B9d2          | chr7:26466176-26471577    | 6.642923333 | 7.725223333 |
| Slc22a5       | chr11:53678043-53705205   | 6.641166667 | 3.713541    |
| Adrbk2        | chr5:113339497-113444534  | 6.640216667 | 21.28743333 |
| Zbtb37        | chr1:162947886-162964390  | 6.63937     | 3.541454    |
| Pikfyve       | chr1:65233258-65325270    | 6.637786667 | 7.18407     |
| Bcl2l13       | chr6:120786247-120842860  | 6.63686     | 10.22892333 |
| Uty           | chrY:433586-582181        | 6.6359253   | 6.269323667 |
| Tfdp2         | chr9:96096693-96224065    | 6.634876667 | 11.1489     |
| Nudt22        | chr19:7067508-7070527     | 6.634826667 | 13.25108    |
| Kdm1b         | chr13:47138907-47179982   | 6.63288     | 8.93172     |
| Gaa           | chr11:119129280-119147012 | 6.629593333 | 18.15067667 |
| Klhl20        | chr1:163018508-163061610  | 6.626516667 | 8.342663333 |
| 1700007J10Rik | chr11:59539418-59553656   | 6.626099    | 0.736123    |
| Cd99l2        | chrX:68673234-68746024    | 6.622763333 | 14.631      |
| 1700102H20Rik | chr17:3557823-3559863     | 6.622563333 | 0.146437    |
| Qdpr          | chr5:45825270-45841468    | 6.621643333 | 15.31572067 |
| Nr3c1         | chr18:39570198-39646899   | 6.621443333 | 6.44454     |
| Sipa1l2       | chr8:127941962-128016610  | 6.620213333 | 5.119663333 |
| Wdr85         | chr2:24817941-24828991    | 6.619553333 | 7.252512333 |
| 2610029G23Rik | chrX:102275113-102280525  | 6.619303333 | 4.90403     |
| Fam107b       | chr2:3630729-3699406      | 6.61888     | 13.49556667 |
| Exosc5        | chr7:26444171-26453051    | 6.618624    | 9.386106667 |
| Zscan22       | chr7:13483163-13493588    | 6.615656667 | 3.409996667 |
| Zbtb24        | chr10:41170201-41185380   | 6.608603333 | 4.567583333 |
| Bdh1          | chr16:31422382-31458987   | 6.604863333 | 7.991906667 |
| Frmf5         | chr2:121371264-121632793  | 6.602643333 | 15.43166333 |
| Ttc27         | chr17:75117089-75262910   | 6.60227     | 5.430186667 |
| Cul9          | chr17:46637553-46683337   | 6.597893333 | 3.558726667 |
| Atpaf2        | chr11:60214125-60230601   | 6.59688     | 15.92910667 |
| Uck1          | chr2:32110521-32115625    | 6.591796667 | 4.18085     |
| Ppp1r9b       | chr11:94852525-94868212   | 6.585556667 | 9.747106667 |
| Zfp12         | chr5:143996886-144009649  | 6.584926667 | 3.480166667 |
| Lrrc28        | chr7:74658295-74790122    | 6.580636667 | 17.45084667 |
| Nr4a3         | chr4:48064119-48096224    | 6.578486667 | 2.037390667 |
| Krt77         | chr15:101690286-101700049 | 6.577813333 | 0.595946667 |
| Ccdc43        | chr11:102546001-102559039 | 6.573804333 | 12.09198    |
| Pppde2        | chr15:81822952-81846570   | 6.572153333 | 12.04901    |
| Zfp597        | chr16:3861543-3872374     | 6.5719      | 10.66471333 |
| Grik4         | chr9:42328494-42752454    | 6.571476667 | 0.381347967 |
| 2810006K23Rik | chr5:124778097-124791853  | 6.567373333 | 10.8597     |
| Tex261        | chr6:83720407-83725806    | 6.56678     | 1.991514    |
| Gm13238       | chr4:145427121-145427895  | 6.56551     | 0.564809333 |

|               |                           |             |             |
|---------------|---------------------------|-------------|-------------|
| 5830433M19Rik | chr4:94166769-94223487    | 6.560826667 | 3.94579     |
| Tyk2          | chr9:20908511-20935719    | 6.560673333 | 6.269906667 |
| Psd4          | chr2:24240916-24264249    | 6.557266667 | 5.875533333 |
| Zfp961        | chr8:74474964-74494232    | 6.553333333 | 16.47427    |
| Evpl          | chr11:116081872-116099405 | 6.551463333 | 11.86183667 |
| Usp49         | chr17:47767638-47821016   | 6.550873333 | 3.072987    |
| Glb1l         | chr1:75194809-75207353    | 6.545293333 | 6.202775667 |
| Mettl6        | chr14:32291983-32308163   | 6.542043333 | 16.34738667 |
| Noa1          | chr5:77723193-77739111    | 6.541706667 | 11.29756667 |
| Fam164c       | chr12:86629540-86640308   | 6.5389      | 1.092303667 |
| Nkd2          | chr13:73956775-73985079   | 6.53879     | 20.3166     |
| Ddah1         | chr3:145421655-145557241  | 6.537746667 | 9.016613333 |
| Gnpnat1       | chr14:45996095-46008471   | 6.5349      | 3.86201     |
| 4732491K20Rik | chr17:12511718-12520116   | 6.534743333 | 2.739635233 |
| Fam83g        | chr11:61497911-61523452   | 6.534513333 | 6.92009     |
| Mesdc2        | chr7:91040509-91050042    | 6.532296667 | 9.661586667 |
| Spata7        | chr12:99866393-99908024   | 6.524026667 | 3.147563333 |
| Tubg1         | chr11:100981444-100987733 | 6.52185     | 9.086093333 |
| Thrb          | chr14:18493473-18870602   | 6.521366667 | 9.424536667 |
| Tmem161b      | chr13:84361900-84435571   | 6.519996667 | 4.979173333 |
| Tssk4         | chr14:56269020-56271376   | 6.514496667 | 0.203556333 |
| 2610301B20Rik | chr4:10801644-10826570    | 6.514153333 | 11.25817333 |
| Mlh1          | chr9:111130731-111174112  | 6.508343333 | 16.79306667 |
| Sorl1         | chr9:41776571-41932372    | 6.50724     | 13.49443333 |
| Ppp1r16a      | chr15:76502109-76525345   | 6.50559     | 10.62179    |
| Tpm2          | chr4:43527583-43536260    | 6.50334     | 3.683893333 |
| Foxn2         | chr17:88840051-88889873   | 6.494196667 | 10.21663333 |
| Dscr3         | chr16:94719330-94748236   | 6.49108     | 7.966693333 |
| Lig1          | chr7:13862661-13896776    | 6.490763333 | 6.369893333 |
| Cc2d2a        | chr5:44053617-44132209    | 6.483613333 | 12.10045    |
| Galk2         | chr2:125684953-125810034  | 6.4831      | 4.73915     |
| Spns1         | chr7:133513573-133521448  | 6.481983333 | 9.67243     |
| Atad3a        | chr4:155114748-155135207  | 6.472396667 | 13.78703    |
| Fn3krp        | chr11:121282686-121292082 | 6.47197     | 8.422037    |
| Vegfb         | chr19:7056961-7062141     | 6.469711    | 7.988943667 |
| Slc30a5       | chr13:101572602-101603382 | 6.46875     | 6.55939     |
| Ccdc57        | chr11:120687855-120794186 | 6.468666667 | 3.26113     |
| Piga          | chrX:160857718-160871847  | 6.465033333 | 12.57023333 |
| Fbp2          | chr13:62938244-62959730   | 6.464643333 | 0.844486333 |
| Nop2          | chr6:125081900-125094771  | 6.464593333 | 14.40492667 |
| Vrk3          | chr7:52003998-52032884    | 6.463783333 | 2.828173333 |
| Spag1         | chr15:36109284-36164932   | 6.462333333 | 8.80449     |
| 2610307P16Rik | chr13:28551902-28977291   | 6.461476667 | 7.36041     |
| Mudeng        | chr14:49686169-49707398   | 6.460836667 | 10.38829    |
| Rrp36         | chr17:46804404-46811204   | 6.460646667 | 8.354786667 |
| Gnao1         | chr8:96334737-96493288    | 6.459526667 | 6.16638     |
| Arl6ip5       | chr6:97160785-97183309    | 6.452576667 | 10.69123    |
| Nol8          | chr13:49748718-49774384   | 6.448616667 | 7.71392     |
| Kbtbd3        | chr9:4309742-4331732      | 6.44255     | 12.03881667 |
| Gmeb2         | chr2:180986155-181022671  | 6.442466667 | 6.472619333 |
| Bcas3         | chr11:85166665-85639560   | 6.440073333 | 9.324536667 |
| Rab13         | chr3:90024738-90029885    | 6.439825    | 3.302295333 |

|               |                           |             |             |
|---------------|---------------------------|-------------|-------------|
| Aasdhppt      | chr9:4294792-4309494      | 6.43466     | 8.74575     |
| Ndufa11       | chr17:56857184-56863671   | 6.434523333 | 13.4124     |
| B330016D10Rik | chr4:141102076-141104228  | 6.433483333 | 1.3286576   |
| Bop1          | chr15:76283425-76307699   | 6.43269     | 12.64205667 |
| Zfp710        | chr7:87169699-87237637    | 6.430373333 | 17.53666667 |
| Hif1an        | chr19:44637343-44650764   | 6.429736667 | 4.298407667 |
| Gpaa1         | chr15:76161723-76165329   | 6.429416667 | 6.704086667 |
| Pcid2         | chr8:13077524-13105343    | 6.42803     | 3.368031    |
| Sertad2       | chr11:20443255-20553026   | 6.423693333 | 13.53514    |
| Lphn2         | chr3:148478549-148617599  | 6.423133333 | 7.184333333 |
| Sez6          | chr11:77744444-77792544   | 6.422213333 | 1.442855667 |
| Cx3cl1        | chr8:97296079-97306326    | 6.41474     | 15.01887    |
| Pqlc1         | chr18:80451983-80489463   | 6.410923333 | 12.26799    |
| Pex10         | chr4:154441138-154446515  | 6.41011     | 1.819961    |
| Eno1          | chr4:149611305-149622982  | 6.39483     | 1.142615627 |
| 1200011I18Rik | chr14:76486038-76510622   | 6.394306667 | 8.39668     |
| Kcnn3         | chr3:89324085-89476416    | 6.39169     | 12.51999    |
| Cyfp2         | chr11:46007350-46126361   | 6.386906667 | 4.504533333 |
| Sft2d3        | chr18:32068747-32071557   | 6.385086667 | 4.44918     |
| Myom1         | chr17:71368896-71476196   | 6.384336667 | 2.53422     |
| Gstt2         | chr10:75294589-75297626   | 6.382013333 | 8.16667     |
| Nkx2-3        | chr19:43686814-43690382   | 6.38086     | 7.5356      |
| Nprl3         | chr11:32132418-32167614   | 6.380123333 | 5.324203333 |
| Tgm1          | chr14:56318845-56332329   | 6.377533333 | 30.89106667 |
| C330013E15Rik | chr15:100444570-100445541 | 6.373494    | 1.13546     |
| Ppp1r8        | chr4:132382839-132399084  | 6.37301     | 22.80806    |
| Nrarp         | chr2:25036277-25038852    | 6.37254     | 5.172686667 |
| Tkt           | chr14:31362334-31387908   | 6.3709      | 6.982123333 |
| Gm10767       | chr13:67006350-67010102   | 6.369413333 | 2.744693333 |
| Abhd8         | chr8:73980598-73987556    | 6.369383333 | 5.22141     |
| Slc25a24      | chr3:108926066-108971327  | 6.368086667 | 14.28083333 |
| Pepd          | chr7:35697425-35829727    | 6.367606667 | 3.014030667 |
| Fastkd5       | chr2:130439573-130455763  | 6.36683     | 7.62178     |
| Fcna          | chr2:25480186-25483494    | 6.363353333 | 9.48799     |
| Oscp1         | chr4:125735808-125766578  | 6.361616667 | 0.558099    |
| Ccdc62        | chr5:124380697-124419904  | 6.358906667 | 3.002363333 |
| Alyref        | chr11:120455829-120459679 | 6.35874     | 4.593502667 |
| Ccdc76        | chr3:116284253-116317505  | 6.356966667 | 6.28852     |
| Dph5          | chr3:115591100-115632241  | 6.356713333 | 6.488276667 |
| Abcc10        | chr17:46440178-46464972   | 6.35597     | 2.303366667 |
| Dpysl5        | chr5:31014267-31101742    | 6.355673333 | 56.26813333 |
| Commd8        | chr5:72548238-72559422    | 6.351543333 | 10.83123667 |
| Zbtb33        | chrX:35542969-35550223    | 6.348103333 | 11.04772667 |
| Gkap1         | chr13:58334711-58375549   | 6.346896667 | 3.081623333 |
| Dgkz          | chr2:91772978-91803720    | 6.34126     | 11.33543667 |
| Nt5c3l        | chr11:100283634-100302403 | 6.33982     | 11.25290667 |
| Lins          | chr7:73834774-73862142    | 6.33636     | 4.77812     |
| Pml           | chr9:58064986-58097593    | 6.33461     | 10.75210333 |
| Zfp462        | chr4:54960816-55096435    | 6.33353     | 15.79646667 |
| Plekhf2       | chr4:10915808-10934766    | 6.32931     | 18.5861     |
| Rdh13         | chr7:4377266-4397259      | 6.32701     | 10.22679667 |
| A530098C11Rik | chr1:44066252-44076851    | 6.31599     | 0.102538667 |

|               |                           |             |             |
|---------------|---------------------------|-------------|-------------|
| Heatr1        | chr13:12487641-12531160   | 6.313753333 | 3.999396667 |
| Fbxl12        | chr9:20442230-20449211    | 6.311416667 | 4.658076667 |
| Tm2d1         | chr4:98022060-98049956    | 6.31095     | 10.16616667 |
| Rpa2          | chr4:132324274-132334661  | 6.30944     | 2.847513333 |
| Nbl1          | chr4:138638206-138648885  | 6.308746667 | 13.58798333 |
| Mto1          | chr9:78296016-78321959    | 6.30668     | 6.004032667 |
| AW146154      | chr7:48734243-48755260    | 6.306433333 | 7.31398     |
| Zc3h12a       | chr4:124795657-124805125  | 6.30422     | 2.380006667 |
| Bcr           | chr10:74523640-74647668   | 6.303896667 | 5.584833333 |
| Tbl3          | chr17:24837597-24844598   | 6.292733333 | 1.468696667 |
| Dennd3        | chr15:73342989-73402672   | 6.29163     | 3.654283333 |
| Cyb5d2        | chr11:72590733-72609341   | 6.29155     | 3.321026333 |
| Plcg2         | chr8:120022190-120159042  | 6.2912      | 2.65975     |
| Nup85         | chr11:115425757-115445238 | 6.289993333 | 9.704776667 |
| Zfp51         | chr17:21587315-21602553   | 6.287026667 | 5.398536667 |
| Gm15910       | chr10:120294684-120300384 | 6.28622     | 2.425011667 |
| Mrm1          | chr11:84626562-84633017   | 6.284893333 | 5.957112333 |
| 1700120E14Rik | chr18:74655331-74690778   | 6.284166667 | 3.857216667 |
| Lpl           | chr8:71404453-71430831    | 6.283806667 | 0.071138947 |
| Arf5          | chr6:28373639-28376499    | 6.283646667 | 18.15055667 |
| Eif2b4        | chr5:31489930-31495512    | 6.281273333 | 1.609655333 |
| D11Wsu47e     | chr11:113545725-113555961 | 6.278303333 | 2.506739667 |
| 2700097O09Rik | chr12:56146647-56181097   | 6.276563333 | 5.198423333 |
| 5430411K18Rik | chr18:78135205-78231766   | 6.276526667 | 7.996646667 |
| Chaf1b        | chr16:93884145-93906351   | 6.27615     | 2.327573333 |
| Dclre1a       | chr19:56603650-56622712   | 6.275683333 | 3.183226667 |
| Stxbp4        | chr11:90337806-90499422   | 6.270983333 | 7.337913333 |
| Rffl          | chr11:82617320-82684712   | 6.26963     | 10.97936667 |
| Rccd1         | chr7:87461501-87469340    | 6.264596667 | 2.516519333 |
| Traf5         | chr1:193821087-193916445  | 6.262033333 | 4.946429    |
| Lrrc33        | chr16:32142910-32165562   | 6.26039     | 1.130409333 |
| Myh10         | chr11:68505416-68630126   | 6.25646     | 4.26384     |
| Hpcal1        | chr12:17697619-17798732   | 6.254823333 | 6.116266667 |
| Zfp938        | chr10:81687601-81704020   | 6.253453333 | 2.4770518   |
| Mthfd1l       | chr10:6179459-6373466     | 6.252433333 | 3.629691333 |
| Kitl          | chr10:99478457-99563046   | 6.252246667 | 4.102513333 |
| Tchh          | chr3:93246251-93252999    | 6.249656667 | 41.2497     |
| Slc30a1       | chr1:193730659-193737126  | 6.246053333 | 7.9805      |
| Trim65        | chr11:115986021-115992442 | 6.243983333 | 5.402896333 |
| Zfyve21       | chr12:113052380-113066599 | 6.24265     | 7.505627333 |
| Esyt1         | chr10:127947305-127962915 | 6.23911     | 7.71583     |
| Vhl           | chr6:113574014-113581627  | 6.238336667 | 4.639046    |
| Bach2         | chr4:32504409-32673083    | 6.234183333 | 1.562249667 |
| Atg10         | chr13:91074953-91363592   | 6.23367     | 5.024026667 |
| Omp           | chr7:105291868-105293957  | 6.230083333 | 0.017902767 |
| Marveld1      | chr19:42221878-42226193   | 6.224953333 | 7.519693333 |
| Akt1s1        | chr7:52104593-52110791    | 6.22295     | 8.264000667 |
| Dusp12        | chr1:172804318-172815671  | 6.22161     | 6.426196667 |
| Sfxn1         | chr13:54167213-54203714   | 6.221403333 | 31.8867     |
| Slc25a14      | chrX:45976756-46015471    | 6.219906667 | 9.931393333 |
| Krt81         | chr15:101289491-101294196 | 6.219707    | 0.346444333 |
| Psmg3         | chr5:140299547-140302797  | 6.216366667 | 8.812943333 |

|               |                           |             |             |
|---------------|---------------------------|-------------|-------------|
| Smarcal1      | chr1:72629824-72683364    | 6.215423333 | 5.755756667 |
| B4galt7       | chr13:55701471-55711315   | 6.201666667 | 4.697939    |
| 4930523C07Rik | chr1:161974510-162008717  | 6.200663333 | 5.655693333 |
| Unkl          | chr17:25325344-25371387   | 6.19683     | 9.872483333 |
| Nhs           | chrX:158274199-158597722  | 6.194326667 | 4.978103333 |
| Ccnj          | chr19:40905768-40923060   | 6.191476667 | 13.41641    |
| Hsd17b12      | chr2:93872853-93998066    | 6.191396667 | 13.45772    |
| Fam43b        | chr4:137950006-137952373  | 6.18821     | 4.362403333 |
| Efhc2         | chrX:16709174-16896494    | 6.18401     | 26.552      |
| Bcdin3d       | chr15:99300514-99305161   | 6.181783333 | 1.966560333 |
| Rxrb          | chr17:34168756-34175348   | 6.177253333 | 8.192976667 |
| Abca1         | chr4:53043660-53172767    | 6.17718     | 1.588386667 |
| Mettl11a      | chr2:30663496-30678534    | 6.169766667 | 1.873303333 |
| Tmem25        | chr9:44601861-44607299    | 6.168346667 | 2.62652     |
| Atm           | chr9:53245226-53344776    | 6.168313333 | 7.31412     |
| Abtb1         | chr6:88785907-88791929    | 6.166486667 | 2.844463333 |
| Ppargc1b      | chr18:61457789-61560085   | 6.166466667 | 0.582414    |
| Dohh          | chr10:80847172-80851097   | 6.16299     | 2.423483333 |
| Nr2f6         | chr8:73898017-73905851    | 6.162313333 | 3.686536667 |
| Hmbs          | chr9:44144430-44152311    | 6.16086     | 7.35517     |
| Tbrg3         | chr15:82720912-82728891   | 6.160216667 | 8.578076667 |
| Slc36a4       | chr9:15514212-15543233    | 6.158746667 | 5.102976667 |
| Ccdc120       | chrX:7308839-7318450      | 6.15672     | 15.86466667 |
| Ythdc2        | chr18:44988318-45049374   | 6.156053333 | 4.2725      |
| Klk13         | chr7:50967936-50982128    | 6.155796667 | 7.489443333 |
| Zfp74         | chr7:30717809-30736912    | 6.155406667 | 11.61573333 |
| Wdr12         | chr1:60133711-60155344    | 6.155312667 | 9.17344     |
| Atp9b         | chr18:80930879-81130797   | 6.149126667 | 8.72159     |
| Cadm1         | chr9:47338434-47661468    | 6.144223333 | 7.27768     |
| Gm15455       | chr1:33892743-33895759    | 6.14291     | 4.763843333 |
| Kit           | chr5:75971011-76052746    | 6.140886667 | 160.062     |
| 6330408A02Rik | chr7:13844315-13864070    | 6.139403333 | 0.744254733 |
| Pfn2          | chr3:57645816-57651679    | 6.13938     | 18.27148667 |
| Carf          | chr1:60155124-60207878    | 6.137496667 | 1.103329667 |
| Pabpc4        | chr4:122960153-122976076  | 6.13717     | 7.582906667 |
| Taf5l         | chr8:126520215-126545209  | 6.13683     | 13.32905    |
| Gm3435        | chr17:15146803-15159413   | 6.13675     | 2.93977     |
| Ccl17         | chr8:97334352-97335936    | 6.135877333 | 11.83992    |
| Orai1         | chr5:123465082-123480461  | 6.13586     | 6.261513333 |
| Slc35b3       | chr13:39024008-39052744   | 6.133126667 | 9.79686     |
| Relb          | chr7:20191570-20214787    | 6.130216667 | 3.724458    |
| Mvk           | chr5:114894314-114910599  | 6.12987     | 44.29468667 |
| Olfm3         | chr3:114607280-114828174  | 6.123533333 | 3.360769667 |
| Ube2v2        | chr16:15551078-15594611   | 6.122826667 | 8.687926667 |
| Scrn3         | chr2:73150708-73175864    | 6.122073333 | 4.881963333 |
| Abhd14a       | chr9:106342381-106350009  | 6.121313333 | 2.027731    |
| Amt           | chr9:108199252-108203928  | 6.12091     | 2.371091667 |
| Trim34a       | chr7:111392970-111410750  | 6.120793333 | 3.508454667 |
| Rfng          | chr11:120642058-120645518 | 6.120206667 | 7.45326     |
| Zfp882        | chr8:74432504-74442750    | 6.118583333 | 6.31931     |
| Vma21         | chrX:69062117-69070045    | 6.11826     | 5.012646667 |
| Eif2b3        | chr4:116692012-116759457  | 6.112933333 | 10.80545333 |

|               |                           |             |             |
|---------------|---------------------------|-------------|-------------|
| Uxs1          | chr1:43807075-43884553    | 6.112746667 | 6.29264     |
| Zfp281        | chr1:138521477-138526968  | 6.11186     | 8.767173333 |
| Pigh          | chr12:80181657-80190657   | 6.111496667 | 23.84731667 |
| Ccdc112       | chr18:46441804-46471582   | 6.1013      | 11.09161333 |
| Rbp2          | chr9:98390955-98410190    | 6.10108     | 37.70725333 |
| Igtp          | chr11:58013057-58021094   | 6.098006    | 5.677926667 |
| 1810014B01Rik | chr10:86148271-86152699   | 6.09581     | 2.19589     |
| Igfbp3        | chr11:7106095-7113926     | 6.0876      | 16.47467333 |
| Pih1d1        | chr7:52409767-52415434    | 6.084076667 | 14.50095    |
| Maoa          | chrX:16196823-16264938    | 6.08011     | 4.743143333 |
| Dedd2         | chr7:25987858-26004878    | 6.077956667 | 12.55552333 |
| C130060C02Rik | chr19:16059564-16085402   | 6.076773333 | 0.432524333 |
| Zfp277        | chr12:41041632-41172377   | 6.076433333 | 5.769103333 |
| 2210039B01Rik | chr12:74649469-74652973   | 6.074119    | 0.4369742   |
| Hist1h2an     | chr13:21878694-21879087   | 6.07247     | 2.851196667 |
| Tmem69        | chr4:116224132-116228548  | 6.069156667 | 5.554346667 |
| Ano9          | chr7:148287117-148303705  | 6.068396667 | 10.82158    |
| Prdm10        | chr9:31122691-31186128    | 6.060223333 | 5.419933333 |
| Zfp746        | chr6:48012393-48036592    | 6.054366667 | 13.3043     |
| Gm12060       | chr11:23458059-23458842   | 6.052713    | 5.785052    |
| Gm15708       | chr5:145037929-145041383  | 6.051673333 | 11.55208333 |
| Paqr4         | chr17:23873152-23877297   | 6.048666667 | 8.303293333 |
| Rnf26         | chr9:43918863-43921134    | 6.047926667 | 8.233331667 |
| Rnase1        | chr14:51764676-51766442   | 6.042873333 | 13.8164     |
| Rfc3          | chr5:152445398-152453783  | 6.040086667 | 4.342246667 |
| Ap3s1         | chr18:46901570-46950480   | 6.03799     | 5.500306667 |
| Pwwp2b        | chr7:146434380-146453152  | 6.037787333 | 11.13355    |
| Edem1         | chr6:108778634-108809350  | 6.035376667 | 8.62315     |
| Ppie          | chr4:122804367-122817184  | 6.03342     | 2.638713333 |
| Fads6         | chr11:115144679-115158860 | 6.028173333 | 4.547372667 |
| 2900008C10Rik | chrX:11711579-11737472    | 6.026133333 | 1.77684     |
| Fam126b       | chr1:58579649-58643177    | 6.025386667 | 5.07107     |
| Fbxo6         | chr4:147519824-147526244  | 6.023473333 | 8.655996667 |
| 2900060B14Rik | chr1:120355245-120355842  | 6.022846667 | 0.915683333 |
| Dnajc25       | chr4:59016064-59036270    | 6.019863333 | 1.641449667 |
| Slc10a1       | chr12:82054171-82069066   | 6.016813333 | 8.625473333 |
| Celsr2        | chr3:108193765-108218412  | 6.01008     | 16.85096667 |
| Tle2          | chr10:81038031-81053590   | 6.005883333 | 7.485556667 |
| Xpo4          | chr14:58201107-58283793   | 6.005663333 | 5.142976667 |
| 4930539E08Rik | chr17:29033339-29052269   | 6.004503333 | 0.176604667 |
| Lama5         | chr2:179911077-179960564  | 6.00371     | 14.36553333 |
| Sass6         | chr3:116297925-116333902  | 5.997873333 | 11.84212    |
| Moap1         | chr12:103978039-103981871 | 5.997793333 | 5.674306667 |
| Acox1         | chr2:127680363-127949628  | 5.994826667 | 0.0211859   |
| Utp18         | chr11:93720556-93747080   | 5.993356667 | 9.568723333 |
| Eif2c3        | chr4:126017921-126106786  | 5.986096667 | 11.33774333 |
| Tmem194b      | chr1:52687548-52708763    | 5.986043333 | 14.18795    |
| Porcn         | chrX:7770975-7783651      | 5.984796667 | 15.562      |
| Guf1          | chr5:69948180-69964869    | 5.98061     | 11.6128     |
| Ocel1         | chr8:73895196-73897588    | 5.980606667 | 3.311623333 |
| Gpr180        | chr14:118536348-118563454 | 5.97826     | 7.004716667 |
| Mgat2         | chr12:70285144-70287760   | 5.97686     | 1.957033333 |

|               |                           |             |             |
|---------------|---------------------------|-------------|-------------|
| Nup210        | chr6:90963060-91066820    | 5.97633     | 9.686063333 |
| Nicn1         | chr9:108192787-108198827  | 5.975703333 | 4.502773333 |
| E030011O05Rik | chr9:96631993-96653250    | 5.975653333 | 1.307983333 |
| Dbil5         | chr11:76031114-76032167   | 5.971506667 | 0           |
| Slc7a11       | chr3:50168857-50247535    | 5.96707     | 4.83299     |
| Enox1         | chr14:77556569-78121570   | 5.964803333 | 0.463601933 |
| Rrp9          | chr9:106379639-106387746  | 5.962593333 | 1.205379333 |
| Sap30         | chr8:59961498-59966657    | 5.960843333 | 34.45566667 |
| Atp10b        | chr11:42963378-43075787   | 5.958326667 | 2.770523333 |
| Bysl          | chr17:47736279-47748441   | 5.958163333 | 5.84197     |
| Plscr3        | chr11:69659873-69665560   | 5.95799     | 14.209      |
| Spopl         | chr2:23365573-23427624    | 5.95742     | 3.542446667 |
| Pgm3          | chr9:86446082-86465449    | 5.948933333 | 3.119193333 |
| Helb          | chr10:119520663-119550021 | 5.94839     | 3.043243333 |
| D9Erttd402e   | chr9:122714664-122745450  | 5.947763333 | 6.378316667 |
| Ascc1         | chr10:59465552-59562738   | 5.93519     | 8.700873333 |
| Padi1         | chr4:140368895-140401693  | 5.93435     | 5.326003333 |
| Dock11        | chrX:33428826-33616557    | 5.932976667 | 14.20405    |
| Fam110a       | chr2:151795133-151805955  | 5.929136667 | 18.03513333 |
| Ppp2r2c       | chr5:37259808-37346317    | 5.927186667 | 9.459436667 |
| Farsa         | chr8:87380884-87393156    | 5.92505     | 14.30415    |
| Bud13         | chr9:46091094-46106866    | 5.924613333 | 4.79057     |
| Gm16119       | chr2:181313184-181319820  | 5.917293333 | 9.507633333 |
| Sf3a2         | chr10:80261479-80267667   | 5.915273333 | 3.797347667 |
| Map4k5        | chr12:70904743-70994150   | 5.913743333 | 18.35149333 |
| Slc6a9        | chr4:117507862-117541910  | 5.913453333 | 30.92089667 |
| 1500010J02Rik | chr11:68829412-68849975   | 5.91208     | 7.753596667 |
| Abhd10        | chr16:45730509-45743019   | 5.910596667 | 14.01776333 |
| 4930471M23Rik | chr5:30950311-30962102    | 5.909676667 | 4.43455     |
| Cxxc5         | chr18:35989471-36021342   | 5.901853333 | 6.940536667 |
| Tbc1d10b      | chr7:134340973-134351982  | 5.901393333 | 6.862396667 |
| Nup188        | chr2:30141952-30199782    | 5.897963333 | 7.774703333 |
| Rad9          | chr19:4195197-4201603     | 5.89778     | 14.24078333 |
| Slc25a21      | chr12:57813620-58298459   | 5.89645     | 7.18402     |
| Zfyve16       | chr13:93257703-93300765   | 5.89495     | 13.00926667 |
| Osbpl1a       | chr18:12913820-13100350   | 5.888973667 | 6.018623333 |
| Trnau1ap      | chr4:131867677-131885453  | 5.879376667 | 4.03319     |
| Smpd2         | chr10:41206977-41210146   | 5.879116667 | 14.20630333 |
| St5           | chr7:116667424-116760661  | 5.873563333 | 15.67743333 |
| Pip5k1a       | chr3:94863519-94910780    | 5.87245     | 8.087680333 |
| 1700029I01Rik | chr4:146514185-146556724  | 5.87101     | 2.621096667 |
| Cep135        | chr5:77020738-77075491    | 5.869463333 | 3.75374     |
| Msi1          | chr5:115879693-115904211  | 5.867106667 | 27.98993333 |
| Dus2l         | chr8:108535406-108577719  | 5.862813333 | 9.08663     |
| D8Erttd82e    | chr8:37157881-37210841    | 5.858806667 | 1.768421667 |
| Mark4         | chr7:20011423-20043843    | 5.858173333 | 7.184333333 |
| 1500004A13Rik | chr3:88625931-88636409    | 5.848586667 | 3.678438667 |
| Pm20d1        | chr1:133693971-133714692  | 5.845333333 | 1.320849333 |
| Sec24d        | chr3:122970413-123068554  | 5.844896667 | 4.523167333 |
| 4933427I22Rik | chr4:139482025-139499434  | 5.838193333 | 0           |
| Dhrs3         | chr4:144482729-144517548  | 5.837576667 | 10.55258    |
| Senp8         | chr9:59582065-59598456    | 5.832326667 | 6.735366667 |



|               |                           |             |             |
|---------------|---------------------------|-------------|-------------|
| 2700049A03Rik | chr12:72237834-72344290   | 5.828053333 | 8.163503333 |
| Mtap2         | chr1:66221902-66489157    | 5.827756667 | 13.6525     |
| Cyp11a1       | chr9:57862823-57874830    | 5.826766667 | 3.007696667 |
| Gm15417       | chr3:89195785-89202701    | 5.823876667 | 9.527804333 |
| Slc30a6       | chr17:74794947-74823569   | 5.820923333 | 14.85093667 |
| Taco1         | chr11:105927420-105934926 | 5.817733333 | 4.183242667 |
| D430042O09Rik | chr7:132851389-133018311  | 5.81685     | 4.066593333 |
| Mrrf          | chr2:35991917-36045803    | 5.816756667 | 5.743043333 |
| Defb14        | chr8:19194327-19195309    | 5.81391     | 0           |
| Urgcp         | chr11:5613419-5662379     | 5.811603333 | 4.02732     |
| H2-Eb1        | chr17:34442811-34453619   | 5.811036667 | 3.821416333 |
| Zfp46         | chr4:135841983-135849857  | 5.810136667 | 12.38114    |
| Kctd5         | chr17:24184686-24210452   | 5.807533333 | 4.445646667 |
| ORF19         | chr17:66460885-66469843   | 5.806476667 | 4.82009     |
| Magohb        | chr6:131234406-131243262  | 5.806256667 | 3.114147    |
| Hebp1         | chr6:135087536-135118233  | 5.805216667 | 0.790746667 |
| Lin9          | chr1:182571464-182620818  | 5.803556333 | 6.899833333 |
| Aph1c         | chr9:66662800-66682513    | 5.801256667 | 6.325066667 |
| Aph1b         | chr9:66623293-66643230    | 5.7999      | 11.05696333 |
| Pip5k1c       | chr10:80755716-80782719   | 5.798056667 | 11.55188333 |
| Rgs10         | chr7:135517138-135561686  | 5.797       | 0.335537667 |
| D7Ert443e     | chr7:141457944-141568511  | 5.796106667 | 4.31407     |
| Wdr83         | chr8:87598933-87604645    | 5.795823333 | 2.652586667 |
| Ttc30b        | chr2:75773906-75776519    | 5.795136667 | 4.17679     |
| Ppil1         | chr17:29387779-29400916   | 5.791013333 | 4.90307     |
| Wrn           | chr8:34344844-34495999    | 5.789713333 | 8.007076667 |
| Cxcl10        | chr5:92775664-92777915    | 5.789391    | 0.037804333 |
| Lamc2         | chr1:154969885-155033577  | 5.789156667 | 14.06628333 |
| A330021E22Rik | chr5:5580981-5664232      | 5.788563333 | 4.818636667 |
| Hapln1        | chr13:89680240-89751437   | 5.786753333 | 0.040570333 |
| Trpm4         | chr7:52558524-52589150    | 5.783413333 | 13.4442     |
| Gprc5c        | chr11:114712845-114733931 | 5.77935     | 52.76423333 |
| 9930005F22Rik | chr4:155506278-155507528  | 5.775576667 | 1.1916173   |
| Lsm6          | chr8:81328766-81345051    | 5.773343333 | 11.28317667 |
| Prim1         | chr10:127452270-127467086 | 5.77274     | 3.67315     |
| Rab44         | chr17:29272000-29285921   | 5.772236667 | 0.851171333 |
| Zfp711        | chrX:109714134-109748671  | 5.767596667 | 8.007066667 |
| Zfp677        | chr17:21520711-21536229   | 5.76305     | 4.741046667 |
| Psph          | chr5:130271433-130293129  | 5.761403333 | 4.86451     |
| Zfp654        | chr16:64780172-64786147   | 5.761133333 | 8.99956     |
| Mageh1        | chrX:149470708-149472106  | 5.76031     | 4.895289667 |
| B930092H01Rik | chr9:61107033-61141616    | 5.75653     | 0.210681433 |
| Prr18         | chr17:8533270-8536978     | 5.755486667 | 7.969933333 |
| Arhgef7       | chr8:11728104-11835217    | 5.75199     | 7.35435     |
| lpo4          | chr14:56244465-56254515   | 5.751743333 | 7.03796     |
| Tbc1d25       | chrX:7731597-7753307      | 5.74831     | 20.13773667 |
| Akr7a5        | chr4:138866658-138874701  | 5.745873333 | 4.528926667 |
| Myo5c         | chr9:75079820-75153257    | 5.740616667 | 9.864570667 |
| Pafah2        | chr4:133952274-133983327  | 5.738266667 | 19.68166333 |
| 5730405O15Rik | chrX:12619140-12622421    | 5.736133333 | 0.041494667 |
| Pot1b         | chr17:55791322-55851926   | 5.735673333 | 4.97488     |
| Cyp2a5        | chr7:27620357-27628283    | 5.728348333 | 28.32651633 |

|               |                           |             |              |
|---------------|---------------------------|-------------|--------------|
| Kank3         | chr17:33947467-33959859   | 5.726402    | 0.75862      |
| Gatsl2        | chr5:134575617-134617628  | 5.723497333 | 14.15918333  |
| Zfp358        | chr8:3493137-3497208      | 5.717913333 | 6.816426667  |
| Ap4b1         | chr3:103613439-103625948  | 5.717873333 | 2.510079667  |
| Zfp653        | chr9:21859903-21875789    | 5.712643333 | 2.272303333  |
| Lgals4        | chr7:29618812-29626722    | 5.710493333 | 8.90965      |
| Ppfa2         | chr10:105907365-106370524 | 5.70899     | 0.273581667  |
| 2810029C07Rik | chr12:112810527-112812613 | 5.70644     | 8.781153333  |
| Endou         | chr15:97541449-97561836   | 5.706143333 | 7.464946667  |
| Trim59        | chr3:68839215-68848664    | 5.69456     | 1.341657667  |
| 2810030E01Rik | chr2:17965713-17970076    | 5.69377     | 1.950343333  |
| Il1rap        | chr16:26581790-26725233   | 5.69283     | 14.9526      |
| Casr          | chr16:36493781-36562220   | 5.69279     | 7.874873333  |
| Snapc4        | chr2:26218284-26236173    | 5.69097     | 9.17032      |
| Map3k13       | chr16:21892041-21931950   | 5.686796667 | 4.769056667  |
| E130317F20Rik | chr10:79314121-79317716   | 5.684276667 | 1.413887333  |
| Nadsyn1       | chr7:150981498-151008746  | 5.683776667 | 2.958213333  |
| 2610044O15Rik | chr17:95214078-95233760   | 5.68366     | 9.104103333  |
| Gtf2e1        | chr16:37509881-37539855   | 5.682973333 | 4.488516     |
| Zfp90         | chr8:108939238-108949789  | 5.680673333 | 5.0884       |
| Adrb2         | chr18:62337469-62339613   | 5.679386667 | 8.350556667  |
| Ankrd22       | chr19:34197038-34240531   | 5.678633333 | 5.70515      |
| Cox18         | chr5:90643749-90653021    | 5.676996667 | 4.601893333  |
| Qtrtd1        | chr16:43861525-43889789   | 5.675810667 | 4.114011333  |
| Gm16576       | chr15:79573127-79587824   | 5.675186667 | 0.408329667  |
| 4930402H24Rik | chr2:130533588-130665846  | 5.674403333 | 3.136773333  |
| Wnk4          | chr11:101121880-101138723 | 5.67401     | 1.507269667  |
| Tmem160       | chr7:17038127-17040839    | 5.668236667 | 6.48668      |
| Nsun6         | chr2:14916757-14976499    | 5.667476667 | 4.139896667  |
| Chst11        | chr10:82448241-82658636   | 5.664173333 | 11.74947333  |
| Bet1l         | chr7:148039282-148042282  | 5.66235     | 4.604624433  |
| Pcdhb19       | chr18:37656651-37661365   | 5.661263333 | 4.448403333  |
| Slurp1        | chr15:74557073-74558456   | 5.661066667 | 20.91542667  |
| Impdh2        | chr9:108462831-108467897  | 5.658616667 | 9.453716667  |
| Snrpc         | chr17:27977031-27988912   | 5.656836667 | 1.212819333  |
| Zfp451        | chr1:33818597-33871272    | 5.655256667 | 8.76148      |
| Rnf25         | chr1:74640325-74647971    | 5.653733333 | 8.354866667  |
| Lemd3         | chr10:120360466-120416386 | 5.653116667 | 4.09455      |
| Fhit          | chr14:10382607-11994546   | 5.652936667 | 2.566016667  |
| Aldh7a1       | chr18:56685389-56732593   | 5.65153     | 7.852536667  |
| Hivep3        | chr4:119487282-119808016  | 5.65116     | 7.098926667  |
| Prps1         | chrX:136991141-137010679  | 5.650603333 | 7.612633333  |
| Clasrp        | chr7:20166391-20189817    | 5.64921     | 2.822876667  |
| Lnx1          | chr5:74988471-75098928    | 5.64546     | 5.19591      |
| Sema4g        | chr19:45063833-45077885   | 5.643863333 | 6.0994       |
| Ehbp1l1       | chr19:5707373-5726317     | 5.643303333 | 1.946787333  |
| Zfp68         | chr5:139044879-139060971  | 5.641336667 | 13.839836667 |
| Rapgef2       | chr3:78866450-78949797    | 5.640436667 | 6.38379      |
| Mmgt1         | chrX:53838688-53851096    | 5.640416667 | 8.051253333  |
| Mad2l1bp      | chr17:46284333-46290500   | 5.63694     | 5.176596667  |
| Gcsh          | chr8:119505727-119517349  | 5.635308667 | 17.53017     |
| Ints2         | chr11:86024184-86071070   | 5.635213333 | 7.782486667  |

|               |                           |             |             |
|---------------|---------------------------|-------------|-------------|
| Ppp2r3c       | chr12:56381800-56403987   | 5.63315     | 4.637086667 |
| Zfp738        | chr13:67768377-67784449   | 5.62987     | 4.291843333 |
| Limd2         | chr11:106017569-106021456 | 5.62957     | 7.51465     |
| lfi202b       | chr1:175892699-175912975  | 5.627756667 | 1.57517     |
| Hoxb2         | chr11:96212945-96215328   | 5.62583     | 1.95464     |
| Baiap2        | chr11:119804405-119868096 | 5.6257      | 17.7106     |
| Zfp780b       | chr7:28744818-28764176    | 5.622173333 | 10.78779333 |
| Chic1         | chrX:100551814-100591457  | 5.621316667 | 6.933516667 |
| Snrpn         | chr7:67127387-67285105    | 5.619046667 | 3.404249333 |
| Cxcl17        | chr7:26185071-26197905    | 5.619023333 | 36.55066667 |
| Tas2r140      | chr6:133004872-133005811  | 5.617386667 | 0           |
| 2610037D02Rik | chr15:96020904-96028405   | 5.615416667 | 0.008208467 |
| Al646519      | chr2:147187278-147188529  | 5.614496667 | 0.338820667 |
| Tmem38b       | chr4:53838916-53874890    | 5.60799     | 8.57338     |
| Nubpl         | chr12:53198732-53411946   | 5.606466667 | 4.598823    |
| Cxcr6         | chr9:123715594-123720872  | 5.604903333 | 0.915214733 |
| 2700046G09Rik | chr19:32463705-32465674   | 5.603363333 | 1.742507    |
| Eefsec        | chr6:88207327-88396533    | 5.60316     | 5.197793333 |
| Tecpr1        | chr5:144956217-144984447  | 5.60028     | 4.63908     |
| Kcnj13        | chr1:89282858-89291304    | 5.6001      | 9.390723333 |
| 1700080N15Rik | chr2:4053110-4062187      | 5.599413333 | 0.95136     |
| BC024659      | chr13:41345212-41371946   | 5.59881     | 8.69518     |
| Aldh4a1       | chr4:139178808-139205606  | 5.596423333 | 5.53577     |
| Lgmn          | chr12:103632307-103677907 | 5.596286667 | 8.84448     |
| Gm15441       | chr3:96359690-96370724    | 5.595566667 | 1.336252    |
| BC048403      | chr10:121176992-121189915 | 5.592733333 | 3.744583333 |
| Ttc39a        | chr4:109079704-109117350  | 5.591623333 | 33.11243333 |
| Zfp768        | chr7:134486308-134488828  | 5.590783333 | 5.345926667 |
| Slc35b2       | chr17:45701100-45704618   | 5.589866667 | 10.45612333 |
| lkbkap        | chr4:56762551-56815203    | 5.58885     | 5.415513333 |
| Scd3          | chr19:44277777-44318506   | 5.586696667 | 1.603951333 |
| Eif2ak4       | chr2:118214352-118300970  | 5.579223333 | 5.729674333 |
| Gprasp2       | chrX:132373572-132379269  | 5.57915     | 16.21351333 |
| Sh3rf2        | chr18:42213363-42318349   | 5.578896667 | 6.320043333 |
| Fbxo31        | chr8:124073342-124102706  | 5.574356333 | 4.27389     |
| Nanp          | chr2:150855420-150865115  | 5.572663333 | 6.693980667 |
| Bola3         | chr6:83299477-83308386    | 5.571432    | 7.40047     |
| C2cd3         | chr7:107520742-107618668  | 5.57109     | 9.730116667 |
| Whrn          | chr4:63075943-63156985    | 5.562881333 | 4.02172     |
| Plod2         | chr9:92437060-92503265    | 5.56012     | 7.172933333 |
| AA986860      | chr1:132628552-132641199  | 5.556265333 | 8.146723333 |
| Vat1          | chr11:101320061-101327513 | 5.552496667 | 12.41762    |
| Apoc1         | chr7:20274829-20278007    | 5.5522      | 14.9401     |
| Nrm           | chr17:35998262-36002345   | 5.55189     | 5.113028667 |
| Ppp1r13l      | chr7:19946564-19963882    | 5.551473333 | 12.08406667 |
| Gpatch4       | chr3:87847029-87859914    | 5.550796667 | 5.683360667 |
| Grin3b        | chr10:79433468-79439935   | 5.550703333 | 1.930238    |
| Ephb3         | chr16:21204867-21223377   | 5.5501      | 10.04978333 |
| 1700066M21Rik | chr1:57434463-57442266    | 5.547886667 | 1.565465733 |
| Mcm3ap        | chr10:75931715-75978602   | 5.54782     | 6.129126667 |
| Gcn1l1        | chr5:116015271-116072663  | 5.547086667 | 7.317723333 |
| Spink4        | chr4:40867088-40878428    | 5.546849    | 0.183995667 |

|               |                           |             |             |
|---------------|---------------------------|-------------|-------------|
| Odz3          | chr8:49311018-49760044    | 5.544783333 | 4.380826667 |
| Nhlrc3        | chr3:53255917-53267180    | 5.543863333 | 6.664516667 |
| Gm14479       | chrX:10892283-10892601    | 5.543096667 | 0.150059667 |
| Zfp418        | chr7:7124063-7136271      | 5.542913333 | 9.523543333 |
| Wdr5          | chr2:27370666-27392055    | 5.53964     | 4.88356     |
| Fancm         | chr12:66176592-66233045   | 5.534733333 | 5.398406667 |
| Scrn1         | chr6:54458809-54516376    | 5.534053333 | 0.573231    |
| Pcnt          | chr10:75813998-75905657   | 5.532896667 | 3.9029      |
| Galnt11       | chr5:24728710-24771736    | 5.53101     | 13.0306     |
| Galk1         | chr11:115869670-115874033 | 5.529824333 | 12.98371    |
| Zkscan6       | chr11:65620745-65642741   | 5.526866667 | 5.007246667 |
| Trim27        | chr13:21271799-21286592   | 5.526626667 | 5.073993333 |
| Gm6907        | chr14:59999669-60012349   | 5.526193333 | 1.325206667 |
| 2210012G02Rik | chr4:106806766-106850971  | 5.525193333 | 5.800593333 |
| Extl2         | chr3:115710366-115731934  | 5.524476667 | 8.94269     |
| Ggct          | chr6:54935088-54942861    | 5.52176     | 3.419703333 |
| Rg9mtd3       | chr4:45310039-45329003    | 5.52169     | 15.60769667 |
| Apobec4       | chr1:154597680-154604674  | 5.519193333 | 1.310753533 |
| 4931406H21Rik | chr14:26406289-26410147   | 5.514586667 | 2.504975333 |
| Artn          | chr4:117598766-117602368  | 5.512006667 | 4.22546     |
| Arhgap42      | chr9:8994952-9239013      | 5.510363333 | 5.50326     |
| Wdr54         | chr6:83102703-83106373    | 5.508733333 | 9.441893667 |
| Zfp120        | chr2:149940142-149962414  | 5.50803     | 2.82381     |
| Gtpbp8        | chr16:44738991-44746476   | 5.507853333 | 16.24532333 |
| Fbxl21        | chr13:56623868-56639147   | 5.5046378   | 0.751406667 |
| Syce2         | chr8:87396009-87411345    | 5.502540333 | 26.01907    |
| Slc9a3        | chr13:74258962-74303512   | 5.501423333 | 0.637243667 |
| Lgr6          | chr1:136882929-137001853  | 5.50089     | 3.91078     |
| Homer2        | chr7:88745366-88851811    | 5.498413333 | 24.17033333 |
| Ccdc32        | chr2:118843514-118855129  | 5.498386667 | 8.585433333 |
| Rbfa          | chr18:80389002-80397358   | 5.498243333 | 10.13336667 |
| 4933407H18Rik | chr5:33721344-33762403    | 5.497136667 | 7.392623333 |
| Dzip3         | chr16:48924340-48994225   | 5.49213     | 2.876576667 |
| Cntf          | chr19:12838017-12840122   | 5.480498827 | 3.249151    |
| Daglb         | chr5:144225360-144265310  | 5.479763333 | 6.259596667 |
| Rab40b        | chr11:121217434-121249565 | 5.475703333 | 15.07364667 |
| Akt3          | chr1:178952245-179178898  | 5.474673333 | 5.38367     |
| Zfp319        | chr8:97850035-97855850    | 5.47313     | 3.066237333 |
| Evi5l         | chr8:4166566-4193701      | 5.4722      | 7.847873333 |
| Cask          | chrX:13094207-13423667    | 5.467536667 | 12.98843333 |
| Gm14434       | chr2:175639522-175655901  | 5.46724     | 2.17187     |
| Rce1          | chr19:4622550-4625617     | 5.46677     | 4.351849    |
| Ccdc48        | chr6:87680862-87705905    | 5.46506     | 0.652759    |
| Tmem206       | chr1:193149843-193176804  | 5.464693333 | 8.195683333 |
| 1810021B22Rik | chr15:88901627-88906284   | 5.46404     | 1.534793333 |
| Bbs10         | chr10:110735734-110738792 | 5.462383333 | 1.826963333 |
| Bap1          | chr14:32064674-32073115   | 5.461973333 | 8.213003333 |
| Arap1         | chr7:108496582-108561100  | 5.461823333 | 8.877456667 |
| Tmco4         | chr4:138528819-138615086  | 5.455753333 | 2.633854333 |
| Lcmt2         | chr2:120963027-120966434  | 5.454123333 | 2.057006333 |
| Zfp346        | chr13:55206669-55236432   | 5.45372     | 2.707686667 |
| Inpp4a        | chr1:37356737-37467580    | 5.45279     | 3.871326667 |

|               |                           |             |             |
|---------------|---------------------------|-------------|-------------|
| Apba3         | chr10:80730916-80735992   | 5.450933333 | 7.82884     |
| Zfp108        | chr7:25039812-25047463    | 5.449934667 | 2.6505      |
| Rnf122        | chr8:32222317-32241945    | 5.448943333 | 17.33952    |
| Cd164l2       | chr4:132776723-132780469  | 5.448376667 | 40.07000667 |
| Al480653      | chr16:30955588-31081518   | 5.44821     | 3.40994     |
| Gm14475       | chrX:10895450-10895768    | 5.44583     | 0.126248667 |
| Rnf157        | chr11:116197658-116274346 | 5.443106667 | 5.206510667 |
| Fam23a        | chr2:14096150-14143620    | 5.437726667 | 0.7241175   |
| G630016D24Rik | chr14:52636539-52639462   | 5.436973333 | 3.903483333 |
| Vps37b        | chr5:124454649-124482269  | 5.436583333 | 8.607546667 |
| Plbd2         | chr5:120933901-120953632  | 5.436416667 | 12.11139333 |
| Dhx37         | chr5:125894773-125914418  | 5.43542     | 1.679737667 |
| Tfcp2         | chr15:100333226-100382378 | 5.435123333 | 4.297513333 |
| Gpr64         | chrX:156828621-156936002  | 5.434856667 | 4.922043333 |
| Yaf2          | chr15:93114263-93167366   | 5.430776667 | 3.886176333 |
| 4930430F08Rik | chr10:100034907-100051893 | 5.430167    | 6.153143333 |
| Gpr56         | chr8:97501008-97538108    | 5.429766667 | 36.13043333 |
| 4833418N02Rik | chr17:87674225-87682154   | 5.42897     | 5.646136667 |
| Gm5088        | chr14:90296030-90299254   | 5.42849     | 5.376933333 |
| Usp20         | chr2:30837798-30878175    | 5.428083333 | 8.08318     |
| Map2k5        | chr9:63011576-63225659    | 5.42784     | 8.522733333 |
| Fnip2         | chr3:79259892-79371601    | 5.427676667 | 7.278806667 |
| Clcn6         | chr4:147380592-147412876  | 5.425656667 | 5.694783333 |
| 4933433P14Rik | chr12:106923561-106941267 | 5.424446667 | 5.313383333 |
| Echdc3        | chr2:6109510-6134040      | 5.420163333 | 2.362633333 |
| Pthr2         | chr11:86497484-86505959   | 5.412283333 | 9.00087     |
| Map3k12       | chr15:102328077-102347435 | 5.410563333 | 11.66045    |
| Srbd1         | chr17:86384004-86544515   | 5.409796667 | 4.837943333 |
| Bcar1         | chr8:114234374-114267749  | 5.40793     | 17.23506667 |
| Pcbp4         | chr9:106356168-106366342  | 5.40395     | 3.026636667 |
| Zfp954        | chr7:7067393-7074187      | 5.402403333 | 7.51011     |
| Ccdc136       | chr6:29348925-29376995    | 5.401716667 | 10.37590667 |
| Zfp433        | chr10:81167569-81184721   | 5.400533333 | 7.10677     |
| Mettl21a      | chr1:64653053-64663742    | 5.39963     | 6.969246667 |
| Lxn           | chr3:67261920-67267829    | 5.395954    | 16.79935    |
| Ptpn21        | chr12:99914950-99975615   | 5.395123333 | 3.997916667 |
| 1700112E06Rik | chr14:22838933-23875310   | 5.393753333 | 14.65112    |
| Ttn           | chr2:76542040-76820604    | 5.393103333 | 0.299658333 |
| Haus4         | chr14:55160621-55173198   | 5.392343333 | 2.16049     |
| Rfesd         | chr13:76138982-76156160   | 5.391753333 | 5.370493333 |
| Trp53i11      | chr2:93027740-93041914    | 5.384703333 | 10.70151667 |
| Lpin1         | chr12:16542474-16596576   | 5.383096667 | 4.40296     |
| 0610010B08Rik | chr2:175737073-175753460  | 5.381913333 | 2.182516667 |
| Map3k5        | chr10:19654331-19862556   | 5.381886667 | 4.581096667 |
| D1Ertd622e    | chr1:99540478-99558595    | 5.379063333 | 4.500173333 |
| Lin52         | chr12:85792457-85872483   | 5.375746667 | 2.945863333 |
| Spry2         | chr14:106291163-106296036 | 5.372067667 | 3.068516667 |
| Mthfd2l       | chr5:91360221-91450395    | 5.371306667 | 3.264293333 |
| Cstf1         | chr2:172196502-172206586  | 5.369903333 | 21.04552667 |
| Mre11a        | chr9:14589150-14638861    | 5.36851     | 4.031756667 |
| Ubtd2         | chr11:32355371-32418709   | 5.36701     | 7.031123333 |
| Hps4          | chr5:112772114-112807444  | 5.365076667 | 12.34314667 |

|               |                           |             |             |
|---------------|---------------------------|-------------|-------------|
| Zfp212        | chr6:47870566-47882636    | 5.36439     | 5.619526667 |
| Tspan8        | chr10:115254339-115286949 | 5.36421     | 2.852026667 |
| 2310047M10Rik | chr11:68873276-68875078   | 5.36181     | 4.496281667 |
| Clip2         | chr5:134965255-135028304  | 5.359996667 | 2.021193333 |
| Pgap2         | chr7:109371587-109386265  | 5.35984     | 16.4546     |
| Eps8          | chr6:137425765-137597641  | 5.359636667 | 6.60421     |
| Cox10         | chr11:63776128-63892974   | 5.358426667 | 13.26434333 |
| Ccl27b        | chr4:42024167-42029569    | 5.358206667 | 0.858906333 |
| Tasp1         | chr2:139659215-139892521  | 5.353256667 | 4.61534     |
| Tcof1         | chr18:60973409-61008618   | 5.351646667 | 3.52445     |
| Abhd6         | chr14:8835415-8889069     | 5.35157     | 6.716853333 |
| Nup93         | chr8:96738500-96838966    | 5.35148     | 16.866      |
| Dhdh          | chr7:52728932-52744166    | 5.35127     | 1.583386667 |
| Rft1          | chr14:31467560-31504499   | 5.35055     | 3.139573333 |
| Pkd1          | chr17:24686894-24733459   | 5.350156667 | 11.43965667 |
| Zfp628        | chr7:4866818-4873605      | 5.348641333 | 7.49307     |
| Dom3z         | chr17:34973963-34976131   | 5.347773333 | 6.38087     |
| Tor1a         | chr2:30816080-30823438    | 5.342986667 | 5.129623333 |
| 1700030A11Rik | chr17:29042209-29043716   | 5.34282     | 0.82867     |
| Chst2         | chr9:95301344-95307689    | 5.342786667 | 4.174133333 |
| Cdkn1c        | chr7:150644243-150646955  | 5.34177     | 3.042426667 |
| Armcx3        | chrX:131291106-131295995  | 5.334586667 | 4.786565333 |
| Chad          | chr11:94426387-94430441   | 5.334288333 | 1.474899333 |
| Man1b1        | chr2:25188262-25207733    | 5.330426667 | 10.43968    |
| Ppan          | chr9:20692618-20696623    | 5.327336667 | 6.86994     |
| Pigl          | chr11:62271961-62327402   | 5.325506667 | 15.52715    |
| Wdr78         | chr4:102710669-102786904  | 5.324136667 | 2.3873578   |
| Fam55d        | chr9:48170123-48208108    | 5.322733333 | 4.932613333 |
| Fam84a        | chr12:14154403-14158844   | 5.322613333 | 11.69890333 |
| Tmem45b       | chr9:31233780-31271823    | 5.321313667 | 146.337     |
| Mfsd7c        | chr12:87087488-87154535   | 5.320456667 | 1.171383333 |
| Abhd12b       | chr12:71255157-71284193   | 5.320446667 | 0.0709598   |
| Zfp566        | chr7:30862355-30875529    | 5.320092667 | 1.787528667 |
| Ren1          | chr1:135247250-135256896  | 5.31926     | 0.66760373  |
| Slc39a11      | chr11:113106168-113427129 | 5.31864     | 3.969146667 |
| Tmem180       | chr19:46431369-46449744   | 5.317283333 | 7.49586     |
| B3galt2       | chr1:145487826-145497067  | 5.31406     | 8.167166667 |
| Cd180         | chr13:103483637-103496711 | 5.31355     | 12.01130667 |
| Slc22a21      | chr11:53764325-53793529   | 5.310596667 | 2.96302     |
| 6720456H20Rik | chr14:49066026-49134834   | 5.309973333 | 8.268733333 |
| Ptk7          | chr17:46701399-46766453   | 5.309856667 | 8.946113333 |
| Hist1h3b      | chr13:23844248-23844659   | 5.308173333 | 3.84783     |
| Pdzd4         | chrX:71038695-71070308    | 5.302823333 | 4.774283333 |
| Tfb1m         | chr17:3519255-3557713     | 5.30187     | 3.86531     |
| Zdhhc8        | chr16:18220845-18235229   | 5.301346667 | 6.890613333 |
| Fnip1         | chr11:54251680-54331743   | 5.297573333 | 6.28671     |
| 1700094D03Rik | chr3:89866717-89872269    | 5.29713     | 5.17302     |
| Rhov          | chr2:119094936-119096962  | 5.295943333 | 8.33816     |
| F630043A04Rik | chr14:58425397-58445000   | 5.295803333 | 1.240741667 |
| Ccrn4l        | chr3:51028368-51055576    | 5.29566     | 9.70068     |
| Mgat4a        | chr1:37496184-37593104    | 5.295506667 | 9.71255     |
| Gm3219        | chr14:35158240-35158844   | 5.293824667 | 5.45713     |

|               |                           |             |              |
|---------------|---------------------------|-------------|--------------|
| 4921523A10Rik | chr17:53646784-53678776   | 5.292676667 | 5.309913333  |
| Lypla2        | chr4:135524139-135528509  | 5.28542     | 2.335231     |
| Ttc37         | chr13:76236181-76325431   | 5.274496667 | 3.498533333  |
| Pnpo          | chr11:96799129-96805333   | 5.273336667 | 5.232827667  |
| Pip4k2b       | chr11:97576470-97606018   | 5.27062     | 5.966227333  |
| Thap4         | chr1:95601967-95651415    | 5.269333333 | 6.619583333  |
| Fam199x       | chrX:133584132-133617040  | 5.26919     | 5.71584      |
| Gm14479       | chrX:10898617-10898935    | 5.264026667 | 0.161577     |
| Vrk2          | chr11:26371401-26493920   | 5.263576667 | 6.170066667  |
| Gm14430       | chr2:176404641-176421028  | 5.263556667 | 2.131763333  |
| Dhcr7         | chr7:151009071-151034315  | 5.26305     | 17.335033333 |
| Hoxb3         | chr11:96184439-96209244   | 5.261883333 | 3.007648667  |
| Pdzk1         | chr3:96633987-96674849    | 5.260733333 | 1.495183033  |
| Gm14308       | chr2:176181276-176194747  | 5.260416667 | 2.013523333  |
| Aldh1l2       | chr10:82950191-82996885   | 5.259716667 | 4.92531      |
| 5530601H04Rik | chrX:102236192-102265463  | 5.25806     | 5.40165      |
| Nfxl1         | chr5:72904542-72950884    | 5.257586667 | 6.574623333  |
| 4930599N23Rik | chr6:39068471-39098311    | 5.255707333 | 1.04224672   |
| Fhad1         | chr4:141446765-141567552  | 5.25437     | 2.84723      |
| Gm19461       | chr1:135146428-135166385  | 5.25334     | 0.185770733  |
| Dhrs9         | chr2:69218518-69241143    | 5.25034     | 9.69601      |
| Syk           | chr13:52678805-52744161   | 5.248604    | 4.542808333  |
| Ing5          | chr1:95700541-95718677    | 5.24762     | 3.832086667  |
| Slc4a2        | chr5:23931049-23946765    | 5.245343333 | 6.836013333  |
| 1700067K01Rik | chr8:86525604-86528669    | 5.244864333 | 1.732589333  |
| Zfp748        | chr13:67639589-67654088   | 5.243403333 | 6.74505      |
| Il11ra1       | chr4:41707315-41716346    | 5.24299     | 3.966593333  |
| Acad9         | chr3:35964921-35991779    | 5.242836667 | 7.803163333  |
| Zfp385b       | chr2:77248688-77654873    | 5.238013333 | 0            |
| Dgat1         | chr15:76332444-76342248   | 5.23717     | 6.31422      |
| Olfr901       | chr9:38237868-38238804    | 5.23665     | 0            |
| Ccl27b        | chr4:42664135-42669537    | 5.236126667 | 3.161943     |
| A730017L22Rik | chr2:130698276-130732132  | 5.233116667 | 4.111737     |
| Frm8          | chr19:5850973-5875208     | 5.231736667 | 2.959454667  |
| Sepsecs       | chr5:53034645-53060940    | 5.22806     | 11.10245833  |
| Ccdc157       | chr11:4041126-4060296     | 5.226183333 | 7.230033333  |
| 3110052M02Rik | chr17:21787577-21801933   | 5.22592     | 3.549893333  |
| Jmjd7         | chr2:119853218-119858340  | 5.224526667 | 1.268509667  |
| Golga7b       | chr19:42322067-42344838   | 5.223796667 | 1.092129     |
| Tmprss2       | chr16:97786288-97832802   | 5.21862     | 8.986183333  |
| Mib2          | chr4:155028580-155043363  | 5.217306667 | 2.333779     |
| Dgcr8         | chr16:18254057-18289261   | 5.21589     | 8.16844      |
| Bbs7          | chr3:36472064-36512311    | 5.215873333 | 3.82896      |
| Slc37a4       | chr9:44206258-44211048    | 5.215486667 | 8.219637667  |
| Plxna1        | chr6:89266307-89312607    | 5.215193333 | 21.219       |
| Polr3gl       | chr3:96381796-96398081    | 5.2139      | 6.205923333  |
| Eml1          | chr12:109648864-109777774 | 5.212333333 | 9.717246667  |
| Cand2         | chr6:115724574-115755573  | 5.210496667 | 14.43843333  |
| 8430431K14Rik | chr19:31288032-31290886   | 5.20616     | 0.356223333  |
| Lysmd1        | chr3:94938009-94943447    | 5.205426667 | 5.43027      |
| Ints5         | chr19:8967476-8972380     | 5.20467     | 5.382927333  |
| Rgs1          | chr1:146091798-146096234  | 5.201418    | 0.5517       |

|               |                           |             |             |
|---------------|---------------------------|-------------|-------------|
| Gm5901        | chr7:112523611-112526801  | 5.201407    | 5.11E-38    |
| Akap1         | chr11:88692105-88725900   | 5.197693333 | 4.637663333 |
| Tecpr2        | chr12:112127473-112210604 | 5.19489     | 8.400843333 |
| Bhlhe22       | chr3:17954324-17957514    | 5.194873    | 1.531227333 |
| Lamb3         | chr1:195128187-195170072  | 5.19298     | 5.079003333 |
| Osgin2        | chr4:15924267-15941024    | 5.192013333 | 6.123763333 |
| Zkscan5       | chr5:145965427-145982619  | 5.190405    | 5.412983333 |
| Hsd17b7       | chr1:171879667-171899336  | 5.188003333 | 11.55351    |
| Cpsf1         | chr15:76426237-76438021   | 5.187766667 | 11.55581333 |
| Coq3          | chr4:21806821-21839273    | 5.184723333 | 4.060847    |
| 5830432E09Rik | chr7:142840139-142843997  | 5.184688    | 4.060071    |
| Usp2          | chr9:43875103-43903710    | 5.182803333 | 12.1464     |
| Dcun1d3       | chr7:126996676-127039259  | 5.182436667 | 5.819446667 |
| Zfp781        | chr10:81364655-81393225   | 5.177003333 | 3.725713333 |
| Foxp4         | chr17:48004081-48061581   | 5.175923333 | 15.8489     |
| Mapk15        | chr15:75824198-75829583   | 5.173396667 | 2.582343333 |
| Arl9          | chr5:77433079-77438502    | 5.172383333 | 6.642036    |
| Rdh11         | chr12:80276537-80292806   | 5.17085     | 11.48967333 |
| Hnmt          | chr2:23858431-23904899    | 5.164766667 | 11.62102667 |
| Dapk2         | chr9:66006032-66120049    | 5.161996667 | 2.405773333 |
| Fam73a        | chr3:151936423-152003371  | 5.161993333 | 9.156166667 |
| Ciao1         | chr2:127066673-127073552  | 5.15922     | 6.138536667 |
| Pde1c         | chr6:56019797-56319628    | 5.154796667 | 2.450713333 |
| Ints1         | chr5:140227235-140251632  | 5.15434     | 4.632923333 |
| Gm5577        | chr6:87931676-87934174    | 5.15068     | 11.60567667 |
| Atrnl1        | chr19:57685523-58207830   | 5.149793333 | 9.00349     |
| Grtp1         | chr8:13176868-13200624    | 5.149446    | 9.56305     |
| Gm14137       | chr2:119000244-119003311  | 5.145868333 | 6.294176667 |
| Nol3          | chr8:107800346-107805839  | 5.141866667 | 10.24606333 |
| Fbxo16        | chr14:65885537-65940339   | 5.141157    | 6.544983533 |
| Gstm5         | chr3:107698771-107701603  | 5.138733352 | 10.67283333 |
| Anks4b        | chr7:127317371-127327230  | 5.137896667 | 1.05421     |
| Gpsm3         | chr17:34726750-34728699   | 5.13725     | 2.066583333 |
| Cacnb4        | chr2:52283839-52532101    | 5.137193333 | 4.40773     |
| Clp1          | chr2:84563278-84567425    | 5.13694     | 3.071265667 |
| E030030I06Rik | chr10:21832855-21869076   | 5.135963333 | 1.463645    |
| Nufip1        | chr14:76510697-76537186   | 5.13446     | 5.469486667 |
| Tuft1         | chr3:94416680-94462728    | 5.132303333 | 10.35566    |
| 1700012D14Rik | chr7:118261186-118266189  | 5.12966     | 0.268259667 |
| Gm14308       | chr2:175964487-175977956  | 5.128326667 | 1.982776667 |
| Mlph          | chr1:92811676-92847719    | 5.127149333 | 3.76227     |
| Gm14430       | chr2:175244891-175261278  | 5.12591     | 2.078486667 |
| Aco1          | chr4:40090297-40146042    | 5.12581     | 3.90791     |
| Ifit3         | chr19:34658018-34663472   | 5.125616667 | 0.131698667 |
| Fastkd2       | chr1:63777198-63799959    | 5.122143333 | 6.167536667 |
| 4933403F05Rik | chr18:68419838-68459987   | 5.120733333 | 5.091203333 |
| Tnfrsf11b     | chr15:54082173-54110039   | 5.12066     | 1.032484333 |
| Rab27b        | chr18:70138784-70301244   | 5.120153333 | 4.210366667 |
| Cdk7          | chr13:101466979-101500897 | 5.118656667 | 5.266256667 |
| Mfsd10        | chr5:34976295-34979763    | 5.116819    | 5.291894333 |
| Pbx3          | chr2:34027428-34227556    | 5.116693333 | 6.671549333 |
| 5730494M16Rik | chr18:25285723-25327378   | 5.11642     | 2.51559     |



|               |                           |             |             |
|---------------|---------------------------|-------------|-------------|
| Pdcd7         | chr9:65193874-65207450    | 5.115816667 | 5.347673333 |
| Gm9897        | chr5:4192366-4197651      | 5.113245667 | 3.58665     |
| Klf12         | chr14:100269861-100549015 | 5.10791     | 8.377896667 |
| Coq6          | chr12:85702917-85714746   | 5.105529    | 6.288646667 |
| Sdk1          | chr5:141717487-142689745  | 5.099763333 | 8.52751     |
| Rwdd2a        | chr9:86465594-86468506    | 5.098664    | 10.29855667 |
| 5830415F09Rik | chr4:46389846-46402295    | 5.094173433 | 3.889073333 |
| Rxra          | chr2:27532720-27618839    | 5.09345     | 15.31906667 |
| Fam167a       | chr14:64055230-64084339   | 5.09273     | 9.87283     |
| Eno2          | chr6:124710072-124719527  | 5.086293333 | 2.748349667 |
| Gipc1         | chr8:86176576-86188688    | 5.08624     | 12.65356    |
| C1qb          | chr4:136436060-136442092  | 5.085203333 | 0           |
| 3110057O12Rik | chr3:40698198-40740229    | 5.084683333 | 3.71026     |
| Mina          | chr16:59471600-59492277   | 5.08367     | 11.74229    |
| Bid           | chr6:120843136-120866838  | 5.081733333 | 5.914175    |
| Parp10        | chr15:76063424-76073870   | 5.079156667 | 7.42822     |
| Nr3c2         | chr8:79426406-79767538    | 5.078823333 | 1.692215    |
| Cav1          | chr6:17256334-17291328    | 5.077855333 | 3.681625    |
| Lzts2         | chr19:45089665-45101594   | 5.077436667 | 9.722566667 |
| Lrp3          | chr7:35985952-36000364    | 5.077063333 | 5.930882    |
| Mettl22       | chr16:8470905-8490290     | 5.076646667 | 2.888466    |
| Exosc6        | chr8:113580238-113581499  | 5.075746667 | 4.460676667 |
| Hao2          | chr3:98678441-98697153    | 5.075566667 | 0           |
| Sec22c        | chr9:121589162-121614147  | 5.074356667 | 2.658727    |
| Cpne1         | chr2:155897576-155937701  | 5.072306667 | 4.676917    |
| Sry           | chrY:1918380-1919568      | 5.071833333 | 1.164500333 |
| 2310022B05Rik | chr8:127159655-127187269  | 5.070483333 | 10.44003    |
| Ankrd42       | chr7:99732692-99785652    | 5.067796667 | 3.789655    |
| BC037032      | chr15:3970110-3977406     | 5.067493333 | 0.407992667 |
| Nsun4         | chr4:115704374-115726481  | 5.06698     | 2.541523333 |
| Ung           | chr5:114580443-114589330  | 5.066833333 | 19.37184    |
| Ttc13         | chr8:127195226-127245875  | 5.066393333 | 4.53034     |
| Fam125b       | chr2:33585475-33743466    | 5.066356667 | 9.734196667 |
| Dcaf15        | chr8:86620970-86628661    | 5.06478     | 3.709413333 |
| Catsper2      | chr2:121220090-121239528  | 5.064363333 | 2.8558      |
| Gpr171        | chr3:58900369-58905743    | 5.062936667 | 7.28571     |
| Tmem19        | chr10:114777795-114799318 | 5.062806667 | 8.844116667 |
| Ccdc160       | chrX:50144376-50152645    | 5.061743333 | 2.1223      |
| Mmp21         | chr7:140865952-140871744  | 5.0616      | 0.102063333 |
| Sostdc1       | chr12:37040755-37045039   | 5.061421333 | 4.818123333 |
| Tacc1         | chr8:26265023-26311921    | 5.058056667 | 7.072113333 |
| A4galt        | chr15:83057151-83082204   | 5.057646667 | 2.985127    |
| Ankrd27       | chr7:36371265-36424256    | 5.048566667 | 7.981473333 |
| Slc9a3r2      | chr17:24776226-24787250   | 5.045356667 | 11.21478    |
| Tbx2          | chr11:85646116-85655450   | 5.045316667 | 6.473916667 |
| Nup35         | chr2:80478968-80500228    | 5.04505     | 2.66252     |
| Dhcr24        | chr4:106233642-106261718  | 5.04438     | 45.58933333 |
| Ncln          | chr10:80949203-80959108   | 5.044183333 | 10.63315667 |
| Gm7854        | chr5:43542924-43626593    | 5.04227     | 0.628563333 |
| Rnf217        | chr10:31221692-31329531   | 5.040883333 | 7.00004     |
| Spry1         | chr3:37538871-37543521    | 5.03948     | 11.32731    |
| Slc5a5        | chr8:73406787-73416656    | 5.036607333 | 1.78035     |

|                  |                           |             |             |
|------------------|---------------------------|-------------|-------------|
| Aloxe3           | chr11:68939878-68962617   | 5.03564     | 10.11402333 |
| Gm4532           | chr7:134375931-134376644  | 5.034633333 | 0.256584667 |
| Fn3k             | chr11:121296266-121311804 | 5.034363333 | 0.872014667 |
| Magi2            | chr5:18732863-20210610    | 5.02988     | 1.82599     |
| Rrm1             | chr7:109590208-109618285  | 5.02876     | 7.984546667 |
| Fam187b          | chr7:31758822-31774744    | 5.028196667 | 2.744716667 |
| Adnp2            | chr18:80323873-80348221   | 5.02317     | 19.14303667 |
| Agbl3            | chr6:34730431-34807932    | 5.022676667 | 2.090704667 |
| Hist1h2ai        | chr13:21808290-21808683   | 5.02237     | 3.221123333 |
| Blvra            | chr2:126896392-126922820  | 5.022114667 | 7.392996667 |
| Zfp667           | chr7:6238181-6259485      | 5.02146     | 6.202666667 |
| 2310009B15Rik    | chr1:140748555-140753431  | 5.019301    | 31.08421    |
| Tmem170b         | chr13:41701584-41736726   | 5.01859     | 10.3625     |
| Bzrap1           | chr11:87574042-87599430   | 5.01715     | 1.188903667 |
| Csrnp2           | chr15:100310000-100325670 | 5.015426667 | 8.92882     |
| Hus1             | chr11:8893144-8911140     | 5.009543333 | 5.91883     |
| Pramef8          | chr4:143002328-143010990  | 5.00768     | 5.602376667 |
| Il6ra            | chr3:89673245-89717084    | 5.007006667 | 31.3097     |
| Utp20            | chr10:88209351-88289559   | 5.005253333 | 4.054236667 |
| Exoc5            | chr14:49631818-49686342   | 5.00436     | 13.94803333 |
| 2310057M21Rik    | chr7:138486231-138506212  | 5.0043      | 10.10089    |
| Rhpn2            | chr7:36119255-36177306    | 5.001613333 | 6.01937     |
| Trmt12           | chr15:58704203-58708336   | 4.999966667 | 3.0284      |
| B3galtl          | chr5:150480831-150565174  | 4.998063333 | 3.443123333 |
| Crtc3            | chr7:87731517-87833763    | 4.99761     | 7.02736     |
| Cdk5rap1         | chr2:154161121-154198455  | 4.997064667 | 3.701196667 |
| Zmat1            | chrX:131505911-131543748  | 4.99344     | 1.615492667 |
| Smpd3            | chr8:108776447-108861888  | 4.992403333 | 1.332673333 |
| Dtx2             | chr5:136470669-136508751  | 4.992396667 | 3.923886667 |
| Arid3a           | chr10:79389816-79417757   | 4.989803333 | 4.962386667 |
| P4ha1            | chr10:58786043-58836052   | 4.988556667 | 6.7677231   |
| Alox12           | chr11:70054956-70068843   | 4.988353333 | 9.179336667 |
| Cdkn2aipnl       | chr11:51781132-51790838   | 4.98796     | 17.16691    |
| Il1rn            | chr2:24192379-24207011    | 4.985768667 | 17.66396667 |
| Nop16            | chr13:54685551-54691435   | 4.985043333 | 7.581122667 |
| Zfp935           | chr13:62554375-62568172   | 4.982606667 | 3.338406667 |
| OTTMUSG000000166 | chr2:176493061-176507478  | 4.98205     | 1.445493    |
| Zfp930           | chr8:71732944-71754438    | 4.98185     | 2.635043333 |
| 2510012J08Rik    | chr10:80783847-80788996   | 4.98073     | 5.466153333 |
| Ciapi1           | chr8:97343718-97362240    | 4.97927     | 1.586643    |
| Ccdc116          | chr16:17139156-17144516   | 4.976956667 | 1.813063333 |
| Dcps             | chr9:34931998-34983572    | 4.97629     | 8.455       |
| E230025N22Rik    | chr18:36844576-36855579   | 4.976226667 | 0.037253    |
| 8430408G22Rik    | chr6:116600701-116602865  | 4.97363     | 24.46856667 |
| Wars2            | chr3:98945012-99024126    | 4.97197     | 2.827404033 |
| Otop1            | chr5:38668642-38695456    | 4.968026667 | 2.412592    |
| Ptar1            | chr19:23761889-23795619   | 4.967616667 | 12.30632333 |
| Rnu12            | chr15:82980074-82980224   | 4.960866667 | 33.98463333 |
| Zfp781           | chr10:81205565-81233887   | 4.96029     | 3.594273333 |
| Wdr4             | chr17:31631266-31649432   | 4.96008     | 3.352016667 |
| Etohi1           | chr2:177757988-177770564  | 4.959613333 | 5.963416667 |
| Arntl            | chr7:120350978-120457640  | 4.959026667 | 7.03098     |

|               |                           |             |             |
|---------------|---------------------------|-------------|-------------|
| Lrig3         | chr10:125403274-125452415 | 4.957776667 | 9.025116667 |
| Tubgcp5       | chr7:63049517-63086817    | 4.955396667 | 8.51785     |
| BC006779      | chr2:180962319-180976732  | 4.955263333 | 3.688920667 |
| A930024E05Rik | chr5:123439362-123448350  | 4.954073    | 1.34131     |
| 1600016N20Rik | chr7:148395941-148399979  | 4.952936667 | 4.191816667 |
| Ube2l6        | chr2:84638984-84650160    | 4.952142667 | 4.814714333 |
| Sox12         | chr2:152219347-152223782  | 4.951916667 | 1.230055333 |
| 1700007L15Rik | chr16:33379939-33380822   | 4.951316    | 0.84746     |
| Pkmyt1        | chr17:23863302-23873696   | 4.951096667 | 3.712337333 |
| B230378P21Rik | chr6:32461140-32465576    | 4.949467    | 2.2262285   |
| Wdr65         | chr4:118227300-118293010  | 4.948663333 | 1.611438333 |
| Pcdhb13       | chr18:37602170-37605863   | 4.947348    | 5.34021     |
| Gpt           | chr15:76527193-76530105   | 4.94481     | 2.579965333 |
| 1810043G02Rik | chr10:77441394-77448183   | 4.94207     | 5.953773333 |
| A630066F11Rik | chr10:7383168-7384421     | 4.940406333 | 2.339637667 |
| Pitx2         | chr3:128902835-128922508  | 4.94013     | 29.61073333 |
| Myd88         | chr9:119245105-119249158  | 4.939453333 | 2.854432333 |
| Poc5          | chr13:97158248-97185542   | 4.938183333 | 5.284353333 |
| Polr3f        | chr2:144353480-144367515  | 4.937756667 | 6.48571     |
| Zfp943        | chr17:22099525-22131333   | 4.936866667 | 3.359296667 |
| Slc16a11      | chr11:70027411-70029916   | 4.936397333 | 7.21555     |
| Zfp446        | chr7:13563196-13571065    | 4.936253333 | 2.164385667 |
| Rab11fip2     | chr19:59978786-60019557   | 4.934396667 | 8.17456     |
| Rhbdd3        | chr11:4999440-5006094     | 4.93265     | 6.46419     |
| Hmga2-ps1     | chr1:178764754-178766264  | 4.9318399   | 0.125117567 |
| Bnipl         | chr3:95045214-95055115    | 4.928286667 | 6.913113333 |
| Dnmt3b        | chr2:153475189-153513466  | 4.925406    | 2.214313333 |
| Zbtb22        | chr17:34053120-34056270   | 4.920103333 | 6.208043333 |
| Serinc5       | chr13:93381092-93481901   | 4.917816667 | 13.04471333 |
| Ptrf          | chr11:100818050-100831931 | 4.917473333 | 7.630603333 |
| Slc15a4       | chr5:128076035-128097762  | 4.91451     | 6.837036667 |
| 1110038D17Rik | chr10:74969558-74980067   | 4.9077      | 3.58602     |
| Efcab7        | chr4:99496190-99585388    | 4.903626667 | 9.395466667 |
| Sema4c        | chr1:36605486-36615226    | 4.901273333 | 9.77399     |
| lqsec1        | chr6:90609591-90760117    | 4.900296667 | 4.29907     |
| A830010M20Rik | chr5:107926763-107941575  | 4.89894     | 1.911123333 |
| 1700052K11Rik | chr11:105040334-105042747 | 4.897196667 | 0.904200667 |
| Fam109b       | chr15:82171608-82176140   | 4.895524333 | 0.4622344   |
| 5730409E04Rik | chr4:126287097-126291615  | 4.892406667 | 1.322063333 |
| Prpf31        | chr7:3581586-3594086      | 4.891973333 | 10.70429667 |
| Tnfrsf21      | chr17:43153503-43226137   | 4.891883333 | 19.9452     |
| 1110031I02Rik | chr11:121038906-121065962 | 4.89025     | 9.2563      |
| BC037034      | chr5:138700885-138705280  | 4.889746667 | 2.367542    |
| Fry           | chr5:151062504-151300328  | 4.888053333 | 7.222166667 |
| Polk          | chr13:97250643-97312440   | 4.886953333 | 9.577383333 |
| Pdpr          | chr8:113618644-113659044  | 4.882463333 | 8.08143     |
| Tk2           | chr8:106750590-106772458  | 4.881606667 | 4.52175     |
| 4933432B09Rik | chr15:79440005-79489386   | 4.880953333 | 2.627876667 |
| Hist1h2ah     | chr13:22127034-22127421   | 4.880006667 | 3.100773333 |
| Mesdc1        | chr7:91029004-91032851    | 4.87829     | 4.298743333 |
| Sipa1         | chr19:5651184-5663707     | 4.876499667 | 2.376987    |
| Mul1          | chr4:137990586-137998180  | 4.87624     | 3.453253333 |

|               |                           |             |             |
|---------------|---------------------------|-------------|-------------|
| Nos1ap        | chr1:172247626-172519980  | 4.87573     | 5.984576667 |
| Cep76         | chr18:67777050-67800990   | 4.874556667 | 1.899651    |
| Zmynd17       | chr14:21302085-21316123   | 4.872616333 | 2.826824667 |
| A930013F10Rik | chr8:23744856-23747281    | 4.870056667 | 4.87317     |
| C130036L24Rik | chr1:88256148-88264539    | 4.869986667 | 1.159485667 |
| Tha1          | chr11:117729262-117734840 | 4.86913     | 2.359961467 |
| Dbdd2         | chr2:164311639-164318823  | 4.86738     | 4.701433333 |
| Cyth3         | chr5:144383315-144471117  | 4.865133333 | 9.8054      |
| B3galnt2      | chr13:14046940-14091335   | 4.864186667 | 6.663186667 |
| 1600027N09Rik | chr2:180316008-180320339  | 4.861663333 | 1.848696667 |
| Alg9          | chr9:50583329-50651744    | 4.860426667 | 6.310903333 |
| Agpat5        | chr8:18846278-18884413    | 4.85723     | 9.221953333 |
| Ccdc61        | chr7:19476232-19495753    | 4.853786667 | 4.087364    |
| Etnk2         | chr1:135260148-135276895  | 4.85325     | 2.155166667 |
| Bcorl1        | chrX:45694534-45759905    | 4.85246     | 6.44953     |
| Per3          | chr4:150377763-150418731  | 4.849193333 | 6.513116667 |
| Mtrr          | chr13:68699656-68720998   | 4.84144     | 3.461456667 |
| Psmb8         | chr17:34335139-34338399   | 4.840924333 | 0.420266667 |
| Ccdc111       | chr8:47660947-47702554    | 4.837343333 | 2.637963333 |
| Sema4d        | chr13:51796616-51889013   | 4.831586667 | 13.51128    |
| Nat10         | chr2:103561415-103601407  | 4.8299      | 9.36706     |
| Ogfr          | chr2:180324111-180330542  | 4.827436667 | 5.036373333 |
| Tns4          | chr11:98926991-98950620   | 4.825926667 | 28.5315     |
| 6030429G01Rik | chr7:4474558-4484044      | 4.82529     | 18.5658     |
| Sigirr        | chr7:148277073-148286445  | 4.824076667 | 4.254686    |
| Sorbs2        | chr8:46593141-46913260    | 4.82104     | 10.87348    |
| Gm7092        | chr7:26399639-26400911    | 4.820022333 | 10.32966    |
| Sdr9c7        | chr10:127335590-127348815 | 4.817457667 | 9.081248    |
| 1190002H23Rik | chr14:79688556-79701442   | 4.816356667 | 14.15259    |
| Dis3          | chr14:99475852-99498989   | 4.8131      | 4.023253333 |
| Tyrobp        | chr7:31198806-31202598    | 4.811586667 | 0           |
| Mapk11        | chr15:88972913-88980036   | 4.810333333 | 2.814283333 |
| Rab6b         | chr9:103014403-103087600  | 4.809012667 | 2.175224833 |
| Isoc2b        | chr7:4796561-4817781      | 4.806676667 | 5.431174667 |
| Tnfrsf13b     | chr11:60954336-60961144   | 4.805602    | 0.249286667 |
| Srp54a        | chr12:56256326-56365681   | 4.8016      | 4.550506667 |
| Hist1h3g      | chr13:23627286-23627778   | 4.801446667 | 1.27107     |
| Slc4a7        | chr14:15535538-15632457   | 4.795873333 | 14.02978333 |
| Rcn1          | chr2:105226104-105239476  | 4.795133333 | 2.155661    |
| Cwf19l1       | chr19:44183126-44210366   | 4.793453333 | 8.845632333 |
| St3gal1       | chr15:66934436-67008444   | 4.792996667 | 17.88903333 |
| Atg16l2       | chr7:108438129-108450602  | 4.791861333 | 2.031426667 |
| Dnajc16       | chr4:141317912-141346559  | 4.791446667 | 3.76551     |
| Eci3          | chr13:35038482-35055678   | 4.787806667 | 5.3502874   |
| Dennd5a       | chr7:117037294-117103936  | 4.781673333 | 4.530123333 |
| Cd200r2       | chr16:44867209-44915953   | 4.77831     | 3.719119967 |
| Pde12         | chr14:27483602-27489332   | 4.777346667 | 5.171923333 |
| Slc39a8       | chr3:135488454-135551536  | 4.776922    | 111.4998667 |
| Nit1          | chr1:173272367-173275776  | 4.77631     | 20.05563333 |
| Mpp1          | chrX:72355071-72376288    | 4.775216667 | 7.654303333 |
| Med29         | chr7:29170265-29177709    | 4.7724      | 2.22767     |
| D930014E17Rik | chr7:116847250-116855695  | 4.772068667 | 1.589166667 |

|                  |                           |             |             |
|------------------|---------------------------|-------------|-------------|
| 4932415G12Rik    | chr10:94136237-94151358   | 4.77184     | 9.455136667 |
| S100b            | chr10:75716580-75724064   | 4.770373333 | 0.615108667 |
| Chtf18           | chr17:25855974-25864360   | 4.768606667 | 7.590483333 |
| Tox              | chr4:6614532-6917870      | 4.76748     | 4.44304     |
| Tyw3             | chr3:154239483-154260062  | 4.766985667 | 2.261287667 |
| OTTMUSG000000166 | chr2:176082748-176097171  | 4.761476667 | 1.400213667 |
| Slc9a4           | chr1:40637071-40687576    | 4.760573333 | 27.5742     |
| D230037D09Rik    | chr12:103981969-103983607 | 4.7591      | 11.59631    |
| Ankrd54          | chr15:78883523-78893289   | 4.75859     | 5.13863     |
| Tomm40l          | chr1:173147933-173152645  | 4.753887333 | 6.745286667 |
| Clip3            | chr7:31076771-31093386    | 4.753136667 | 18.23066667 |
| Vgll4            | chr6:114812107-114871770  | 4.752818667 | 19.35063333 |
| Rab71l           | chr1:133763853-133769464  | 4.7481      | 4.662982667 |
| Adck2            | chr6:39523874-39538768    | 4.74669     | 4.3773      |
| Efcab9           | chr11:32422732-32427574   | 4.746272667 | 1.14795     |
| Slc44a5          | chr3:153636399-153934684  | 4.745523333 | 0.512046667 |
| AI987944         | chr7:48628299-48648749    | 4.744846667 | 2.350106667 |
| Zfp513           | chr5:31501353-31504676    | 4.740256667 | 4.819876667 |
| Zfp563           | chr17:33226311-33247649   | 4.738336667 | 6.603193333 |
| Ankrd32          | chr13:77182348-77274729   | 4.734013333 | 3.060696667 |
| Lmbr1l           | chr15:98734351-98748529   | 4.73273     | 10.71151333 |
| Abcd1            | chrX:70961935-70983626    | 4.732496667 | 11.97216333 |
| Edc3             | chr9:57556375-57597969    | 4.728356667 | 6.16603     |
| Hemk1            | chr9:107229412-107240681  | 4.727466667 | 3.856486667 |
| Dmwd             | chr7:19661548-19668124    | 4.727350667 | 7.91813     |
| Tor2a            | chr2:32612753-32617764    | 4.727313333 | 16.67229667 |
| Rgs7             | chr1:176989206-177422676  | 4.725626667 | 12.29437    |
| Slc9a2           | chr1:40738556-40825730    | 4.72519     | 6.667166667 |
| Crybg3           | chr16:59490600-59555578   | 4.723793333 | 8.694556667 |
| Zfp944           | chr17:22474955-22498367   | 4.72332     | 2.92079     |
| Cdk2             | chr10:128134994-128142107 | 4.72303     | 2.481732333 |
| Rspry1           | chr8:97125840-97184176    | 4.72136     | 5.64602     |
| Fam122b          | chrX:50596591-50622982    | 4.721046667 | 5.167176667 |
| Hist1h2ap        | chr13:21902335-21902728   | 4.719946667 | 1.590870088 |
| Tab1             | chr15:79963583-79992132   | 4.716423333 | 5.548246667 |
| Gins2            | chr8:123105165-123112975  | 4.71563     | 1.189910667 |
| Hist1h2bb        | chr13:23838602-23839070   | 4.71091     | 5.233033333 |
| Zswim5           | chr4:116550006-116661710  | 4.710053333 | 6.577126667 |
| Malt1            | chr18:65590650-65638446   | 4.709853333 | 6.975306667 |
| Bcl11a           | chr11:23978055-24073558   | 4.70816     | 7.20458     |
| Dynlt1f          | chr17:6851323-6860656     | 4.70751     | 8.476296667 |
| Casp4            | chr9:5308859-5336791      | 4.706976667 | 2.518807667 |
| Uqcc             | chr2:155672621-155756046  | 4.706076667 | 8.72419     |
| Gm9833           | chr3:10088276-10092562    | 4.704307    | 12.51734    |
| Clec11a          | chr7:51559135-51562329    | 4.702556667 | 0.15749     |
| Gm889            | chr12:40902972-40925902   | 4.701826667 | 0.57727     |
| Fbxo30           | chr10:11001127-11017767   | 4.70058     | 10.11180667 |
| Igsf3            | chr3:101181047-101266983  | 4.69823     | 11.5916     |
| Tpcn1            | chr5:120984165-121038622  | 4.689326667 | 6.506973333 |
| Gpm6b            | chrX:162676874-162826965  | 4.688676667 | 2.13238     |
| Tysnd1           | chr10:61158261-61165521   | 4.68746     | 3.71447     |
| Rnf135           | chr11:79997373-80013255   | 4.685226667 | 4.872306667 |

|               |                           |             |             |
|---------------|---------------------------|-------------|-------------|
| Dennd4b       | chr3:90070455-90084587    | 4.682826667 | 2.231043333 |
| Fyn           | chr10:39089604-39285180   | 4.67908     | 6.432793333 |
| Pkd2l2        | chr18:34569076-34602442   | 4.67142     | 1.280394333 |
| Ccdc141       | chr2:76847962-77008692    | 4.6712      | 4.638408333 |
| Arl5b         | chr2:14976988-15000818    | 4.670086667 | 7.548183333 |
| Mras          | chr9:99285838-99337131    | 4.667076667 | 3.64736     |
| Pck2          | chr14:56159102-56168854   | 4.666146667 | 3.089       |
| Plekhm3       | chr1:64835694-65003398    | 4.665543333 | 6.174643333 |
| Lsm1          | chr8:26896062-26914447    | 4.662333333 | 2.68977     |
| 1110006O24Rik | chr5:116081057-116081825  | 4.661446667 | 1.035029    |
| Tab3          | chrX:82819360-82879808    | 4.661263333 | 6.628243333 |
| Dynlt1e       | chr17:6806387-6812617     | 4.661163333 | 5.748163333 |
| Prss27        | chr17:24175209-24182916   | 4.6609      | 2.958933333 |
| Nme6          | chr9:109735307-109745475  | 4.660853333 | 1.846053333 |
| Noc4l         | chr5:111077437-111082401  | 4.658276667 | 16.67123667 |
| Tmem88        | chr11:69210017-69211736   | 4.656576667 | 4.69257     |
| Il1f9         | chr2:24041995-24049087    | 4.654093333 | 6.844393567 |
| Etaa1         | chr11:17838751-17853878   | 4.650256667 | 4.728696667 |
| Irx2          | chr13:72766425-72771642   | 4.648166667 | 3.500623333 |
| Mri1          | chr8:86774474-86781223    | 4.6465      | 5.76962     |
| Rassf9        | chr10:101974855-102009194 | 4.645093333 | 4.789963333 |
| C330018D20Rik | chr18:57115484-57135033   | 4.641663333 | 5.844139667 |
| Nceh1         | chr3:27081925-27143833    | 4.640443333 | 10.01058    |
| Tpd52l1       | chr10:31052185-31165727   | 4.639672    | 2.126219533 |
| Tada2a        | chr11:83892421-83943070   | 4.63906     | 12.67204667 |
| Fndc3b        | chr3:27315083-27609361    | 4.638906667 | 9.917633333 |
| Stk39         | chr2:68048503-68310038    | 4.63843     | 10.74771    |
| Phyhd1        | chr2:30122048-30137669    | 4.63709     | 15.7086     |
| 4930473A06Rik | chr4:83171448-83510574    | 4.63402     | 7.95789     |
| Dact1         | chr12:72410870-72421094   | 4.63391     | 11.11796    |
| F730043M19Rik | chr12:33796575-33832451   | 4.630806    | 0.4020703   |
| Nmb           | chr7:88047112-88049957    | 4.62914     | 1.770854    |
| Seps2         | chr7:134415394-134417573  | 4.628786667 | 7.4865      |
| Plag1         | chr4:3828304-3865552      | 4.625846667 | 5.821703333 |
| Pigw          | chr11:84689814-84693787   | 4.62382     | 1.814631767 |
| Golm1         | chr13:59736356-59777145   | 4.623703333 | 10.57337667 |
| Gdpd5         | chr7:106530058-106609494  | 4.623053333 | 5.044103333 |
| lspd          | chr12:37108105-37416031   | 4.622743333 | 2.093943333 |
| Gm12504       | chr4:44134764-44136995    | 4.619313333 | 3.966108333 |
| Chst15        | chr7:139427937-139508838  | 4.618553333 | 32.41846667 |
| Oxsm          | chr14:17071172-17082322   | 4.61488     | 3.9685      |
| Gfer          | chr17:24830135-24833101   | 4.61309     | 11.81595333 |
| Mtbp          | chr15:55388962-55457978   | 4.612286667 | 3.294283333 |
| Slc27a4       | chr2:29658199-29673042    | 4.611403333 | 9.381046667 |
| Lifr          | chr15:7079571-7147489     | 4.61027     | 1.581142667 |
| Sema3b        | chr9:107500445-107511572  | 4.610216667 | 3.53662     |
| Tacr2         | chr10:61715185-61728738   | 4.608883667 | 0.603423733 |
| 1700110K17Rik | chr9:40141056-40150922    | 4.60676     | 1.340358333 |
| Slc25a29      | chr12:110064087-110074086 | 4.60326     | 8.120156667 |
| Ltb4r1        | chr14:56384798-56387329   | 4.600014333 | 3.90128     |
| Aven          | chr2:112333120-112471410  | 4.599703333 | 1.883359333 |
| Scgb3a1       | chr11:49477111-49478620   | 4.59936     | 18.96043    |

|               |                           |             |             |
|---------------|---------------------------|-------------|-------------|
| Gxylt2        | chr6:100654727-100755075  | 4.598893333 | 1.434623333 |
| Efna1         | chr3:89075651-89084873    | 4.597390333 | 5.941666667 |
| Shisa2        | chr14:60244117-60250497   | 4.597254333 | 1.721807    |
| Taf10         | chr7:112891407-112892852  | 4.592759333 | 7.40597     |
| Cd3eap        | chr7:19941357-19944832    | 4.59059     | 3.872226667 |
| Megf11        | chr9:64233432-64557012    | 4.590586667 | 1.951062667 |
| Ttc21b        | chr2:66022385-66094674    | 4.589663333 | 6.259916    |
| Acaca         | chr11:84008939-84215153   | 4.587233333 | 4.192143333 |
| Bach1         | chr16:87699198-87733591   | 4.58444     | 3.115513333 |
| Zfp568        | chr7:30768973-30813301    | 4.584086667 | 5.478696667 |
| Osbp15        | chr7:150874666-150927868  | 4.58312     | 8.905176667 |
| Sult6b1       | chr17:79283277-79306332   | 4.583043333 | 0.203185    |
| Cnksr2        | chrX:154259504-154481042  | 4.583013333 | 7.6415      |
| Spire1        | chr18:67647862-67712375   | 4.581173333 | 5.306722    |
| Cuedc1        | chr11:87912647-88007642   | 4.581026667 | 5.537276667 |
| Mgst1         | chr6:138089057-138105273  | 4.580382667 | 9.812       |
| Trub2         | chr2:29631630-29643191    | 4.577793333 | 9.631393333 |
| Bag4          | chr8:26875010-26895681    | 4.577756667 | 9.174446667 |
| Dgkd          | chr1:89749861-89841064    | 4.577576667 | 13.63315667 |
| Hist1h2bp     | chr13:21879356-21881082   | 4.57619     | 6.249643333 |
| Hilpda        | chr6:29222487-29225449    | 4.576186667 | 4.855476667 |
| Fzd5          | chr1:64777131-64784324    | 4.575413333 | 4.364693333 |
| Gm5801        | chr14:56629128-56630317   | 4.574456667 | 12.62505667 |
| Fastkd1       | chr2:69524880-69550663    | 4.568543333 | 1.660260667 |
| Ica1l         | chr1:60045911-60099931    | 4.566786667 | 10.97542    |
| Camk2g        | chr14:21554096-21613310   | 4.565873333 | 11.68479667 |
| Gm14483       | chrX:10876382-10876883    | 4.564783333 | 0.329232333 |
| Haus6         | chr4:86227188-86257926    | 4.564506667 | 5.546786667 |
| Eif2c4        | chr4:126166786-126210702  | 4.563606667 | 6.313583333 |
| Kdm4b         | chr17:56465472-56542296   | 4.56209     | 4.75495     |
| Mbp           | chr18:82644514-82755029   | 4.56092     | 9.676206667 |
| Atrip         | chr9:108962260-108976638  | 4.560526667 | 5.783856667 |
| Etv3          | chr3:87329499-87344078    | 4.56016     | 10.02429333 |
| Wbscr16       | chr5:134623927-134652637  | 4.559716667 | 1.972543333 |
| Sbk1          | chr7:133416132-133438513  | 4.558126667 | 11.76422667 |
| Xpnp3         | chr15:81230617-81285318   | 4.557613333 | 9.86936     |
| Zfyve26       | chr12:80333333-80397269   | 4.55647     | 3.986923333 |
| Gm13157       | chr4:147128082-147183897  | 4.555536667 | 2.151636667 |
| Supv3l1       | chr10:61892125-61912441   | 4.554116667 | 5.868305    |
| Slc25a34      | chr4:141174739-141179749  | 4.553903333 | 1.948569667 |
| Mki67         | chr7:142881470-142908062  | 4.553723333 | 14.86579333 |
| Mpzl3         | chr9:44863270-44882971    | 4.5533958   | 7.234559333 |
| Grasp         | chr15:101054637-101063187 | 4.545463333 | 15.22279333 |
| Gm2a          | chr11:54911486-54926530   | 4.543446667 | 12.66350333 |
| 1110034G24Rik | chr2:132516018-132576791  | 4.542283333 | 1.723396667 |
| 1810008A18Rik | chr10:76949399-76978558   | 4.53926     | 2.884421333 |
| Zfp93         | chr7:25055436-25062813    | 4.538963333 | 4.197853333 |
| Atp4a         | chr7:31497250-31510553    | 4.53861     | 1.686034667 |
| Sema6a        | chr18:47404907-47528522   | 4.537236667 | 3.43963     |
| Ube2o         | chr11:116399066-116442761 | 4.532186667 | 4.362263333 |
| Mettl15       | chr2:108932456-109118447  | 4.531966667 | 5.8356      |
| Scly          | chr1:93194914-93217657    | 4.530333333 | 5.08974     |

|               |                           |             |             |
|---------------|---------------------------|-------------|-------------|
| 2310046O06Rik | chr9:57385334-57390994    | 4.528766667 | 3.24623     |
| Dok3          | chr13:55624595-55629899   | 4.528053333 | 5.959198333 |
| Dynlt1e       | chr17:6853656-6860656     | 4.52709     | 5.08473     |
| Slc10a3       | chrX:71614557-71618688    | 4.52468     | 5.97002     |
| Gpc1          | chr1:94728262-94756773    | 4.52404     | 10.53245667 |
| Gnpda1        | chr18:38487190-38498647   | 4.522906667 | 6.740505667 |
| Helq          | chr5:101191166-101227619  | 4.520673333 | 10.91203    |
| Zcchc8        | chr5:124148310-124171053  | 4.520103333 | 8.785933333 |
| Dennd5b       | chr6:148936590-149050202  | 4.518796667 | 6.40852     |
| Sema7a        | chr9:57787941-57810672    | 4.517643333 | 35.8652     |
| Gpr61         | chr3:107951238-107957800  | 4.516768333 | 0.433858567 |
| Pcdhgc4       | chr18:37974732-38001526   | 4.516333333 | 0.583440467 |
| Btbd19        | chr4:116791822-116798330  | 4.515147667 | 8.120266667 |
| Dpy19l1       | chr9:24216224-24307584    | 4.514996667 | 6.210296667 |
| Prrg4         | chr2:104670897-104690007  | 4.51254     | 7.795136667 |
| Gm6644        | chr6:34253933-34267443    | 4.510666667 | 9.213293333 |
| Nudt5         | chr2:5766079-5789782      | 4.510533333 | 2.762286667 |
| 1110020G09Rik | chr15:9001008-9040244     | 4.50384     | 3.383283333 |
| Rps6ka5       | chr12:101787987-101963238 | 4.503243333 | 4.22146     |
| Pank4         | chr4:154338241-154355047  | 4.501533333 | 10.42510667 |
| Gtf2h3        | chr5:125029156-125047689  | 4.500483333 | 4.36492     |
| Arl10         | chr13:54676373-54682489   | 4.499383333 | 2.236233333 |
| Epas1         | chr17:87153203-87232750   | 4.498176667 | 21.36880267 |
| Tmem98        | chr11:80623916-80635535   | 4.497853333 | 5.21253     |
| Cdk5r2        | chr1:74901602-74904306    | 4.497672667 | 5.279338    |
| Gorab         | chr1:165315039-165333772  | 4.49391     | 3.910594767 |
| Zc3h3         | chr15:75584876-75672338   | 4.49164     | 6.00058     |
| Zfp955a       | chr17:33376451-33392090   | 4.490623333 | 4.2747      |
| Alms1         | chr6:85537524-85652745    | 4.488273333 | 9.036856667 |
| Acaa1b        | chr9:119057160-119066211  | 4.487983333 | 4.11048     |
| Rslcan18      | chr13:67197548-67214964   | 4.487573333 | 8.350973333 |
| Park2         | chr17:11033249-12256226   | 4.486176667 | 6.43137     |
| Spg20         | chr3:54916029-54941254    | 4.48471     | 3.326178333 |
| Fam161b       | chr12:85686266-85702771   | 4.483026667 | 2.077230667 |
| Qrsl1         | chr10:43593995-43621542   | 4.481       | 4.93756     |
| Dnajc27       | chr12:4082573-4110612     | 4.4809      | 0.724338667 |
| AA960436      | chr8:97856183-97871413    | 4.48023     | 7.812736667 |
| Wrb           | chr16:96367025-96379459   | 4.47917     | 1.326367333 |
| Bmp2k         | chr5:97426707-97520067    | 4.478223333 | 8.34932     |
| Inpp4b        | chr8:84239098-84646460    | 4.476723333 | 0.1570501   |
| Zxda          | chrX:92036623-92043628    | 4.47481     | 4.18884     |
| Tmsb15b1      | chrX:133508560-133511413  | 4.474606667 | 0.929039901 |
| Celf4         | chr18:25636120-25912484   | 4.474353333 | 6.70582     |
| Abcd4         | chr12:85943480-85958416   | 4.472313333 | 3.482393333 |
| Dgke          | chr11:88898895-88922062   | 4.47224     | 2.748185867 |
| Maged2        | chrX:147240963-147248882  | 4.47205     | 14.20282667 |
| Apbb1         | chr7:112706978-112730167  | 4.471503333 | 9.2394      |
| Gm239         | chr10:116213600-116333935 | 4.470696667 | 3.718323333 |
| BC002230      | chr12:101363661-101397863 | 4.468066667 | 1.7808      |
| Myc           | chr15:61816895-61821916   | 4.467916667 | 14.88745333 |
| Rhbdd2        | chr5:136108523-136122246  | 4.467496667 | 3.060623333 |
| Itfg2         | chr6:128359461-128374928  | 4.46631     | 4.39762     |



|               |                           |             |             |
|---------------|---------------------------|-------------|-------------|
| Pddc1         | chr7:148594082-148600024  | 4.463309667 | 2.792018    |
| Snap25        | chr2:136539185-136608164  | 4.46283     | 16.57187667 |
| Plat          | chr8:23868215-23893320    | 4.462703333 | 9.819953333 |
| Gm15408       | chr5:149818537-149824352  | 4.45906     | 0.254518667 |
| Proca1        | chr11:78006893-78019265   | 4.454032633 | 7.842826667 |
| Tes           | chr6:17015148-17055825    | 4.453113333 | 13.18631333 |
| Serhl         | chr15:82930634-82947101   | 4.452735    | 4.593666667 |
| Zfp668        | chr7:135008872-135020337  | 4.451873333 | 2.36894     |
| Pus1          | chr5:111202685-111209634  | 4.449023333 | 11.28111333 |
| Gria2         | chr3:80488857-80606713    | 4.448377    | 0.569651667 |
| 4933403G14Rik | chr8:128193717-128197265  | 4.441536667 | 5.798713333 |
| Wnt2b         | chr3:104747722-104764627  | 4.43512     | 2.650876667 |
| Krt42         | chr11:100124195-100131185 | 4.432713333 | 4.800417667 |
| Snx30         | chr4:59818521-59917612    | 4.429496667 | 1.376978    |
| Dscam         | chr16:96813686-97392342   | 4.427173333 | 0.124958467 |
| Rorc          | chr3:94176747-94202161    | 4.42696     | 8.75067     |
| Mvd           | chr8:124957495-124967322  | 4.422373333 | 10.12589333 |
| 3632451O06Rik | chr14:50301693-50403042   | 4.42202     | 10.25144333 |
| Tfam          | chr10:70688224-70700792   | 4.419653333 | 7.224916667 |
| Tmem190       | chr7:4734541-4735942      | 4.417566667 | 0.074940667 |
| Lag3          | chr6:124854376-124861723  | 4.417156667 | 6.460013333 |
| Tyw1          | chr5:130731488-130817437  | 4.417103333 | 1.769856    |
| Mphosph9      | chr5:124700967-124778460  | 4.41512     | 7.413216667 |
| Zfp433        | chr10:81326678-81343831   | 4.412553333 | 10.92967333 |
| Zfp385a       | chr15:103144325-103170517 | 4.409872    | 8.468203333 |
| Arhgap23      | chr11:97311473-97363714   | 4.40767     | 6.87656     |
| Nudt1         | chr5:140807875-140814089  | 4.406583333 | 6.79162     |
| Ccdc148       | chr2:58674108-58998684    | 4.406246667 | 0.986987333 |
| B230206F22Rik | chrX:100756248-100819093  | 4.40347     | 12.21537    |
| Mrps34        | chr17:25032064-25033218   | 4.403436667 | 3.059473333 |
| Tmprss11bnl   | chr5:87088546-87105323    | 4.400656667 | 5.760796667 |
| Bcap29        | chr12:32280218-32319523   | 4.399483333 | 15.10120667 |
| Tubgcp6       | chr15:88929527-88953580   | 4.394976667 | 4.748053333 |
| Dlec1         | chr9:119011595-119056812  | 4.39485     | 1.3103296   |
| Lrrc4c        | chr2:97307830-97471821    | 4.392513333 | 2.107693333 |
| 3200001D21Rik | chr12:89603757-89615767   | 4.392299667 | 1.092400233 |
| E2f3          | chr13:29998443-30077932   | 4.391196667 | 2.26457     |
| Smurf1        | chr5:145637363-145726699  | 4.389713333 | 8.970816667 |
| Zfp282        | chr6:47827553-47858483    | 4.3893      | 3.257519333 |
| Tnk2          | chr16:32644728-32683579   | 4.38861     | 3.84179     |
| Galnt6        | chr15:100520345-100559807 | 4.38842     | 0.633163333 |
| 1110002B05Rik | chr12:55746360-55757559   | 4.38725     | 10.66987667 |
| Trim32        | chr4:65266019-65277274    | 4.385713333 | 14.13243333 |
| Ndr4          | chr8:98226936-98239019    | 4.38557     | 8.892463333 |
| Prkaa2        | chr4:104702254-104782503  | 4.383113    | 3.06874     |
| Psm19         | chr5:123678198-123700134  | 4.381903333 | 5.116973333 |
| Gm3336        | chr8:73242441-73246534    | 4.381496667 | 1.896696667 |
| Zfp709        | chr8:74405966-74416464    | 4.380516667 | 3.752123333 |
| Mthfd1        | chr12:77356218-77420807   | 4.380393333 | 2.243958333 |
| Cadps         | chr14:13205076-13655593   | 4.378863333 | 24.77243333 |
| F630111L10Rik | chr3:58950217-58957550    | 4.376916667 | 3.063037    |
| Kremen1       | chr11:5091555-5161613     | 4.374013333 | 6.152483333 |

|               |                                 |             |             |
|---------------|---------------------------------|-------------|-------------|
| Ammecr1       | chrX:139288016-139401271        | 4.373533333 | 8.303376667 |
| Gm13034       | chr4:146034924-146036119        | 4.373503333 | 6.820226667 |
| Slc25a22      | chr7:148615647-148623773        | 4.371043333 | 8.677623333 |
| Vpreb2        | chr16:17980657-17981173         | 4.370123333 | 0           |
| Yod1          | chr1:132613903-132618634        | 4.36968     | 10.85990333 |
| Lmcd1         | chr6:112223751-112280417        | 4.367317667 | 1.715875967 |
| 4930520004Rik | chr9:114277441-114286356        | 4.363603333 | 0.9423111   |
| Rpia          | chr6:70715713-70742169          | 4.36251     | 6.54035     |
| Frmd4b        | chr6:97236860-97567651          | 4.361686667 | 7.02717     |
| Ccdc99        | chr11:34622686-34647143         | 4.361063333 | 2.536397333 |
| Ssbp4         | chr8:73121388-73132213          | 4.360435667 | 1.987286667 |
| Wibg          | chr10:128184934-128203624       | 4.360313    | 9.368776667 |
| Mlycd         | chr8:121918791-121934988        | 4.359533333 | 3.538452333 |
| Wdr18         | chr10:79422896-79431991         | 4.35849     | 10.29309667 |
| Zbtb43        | chr2:33305807-33324052          | 4.357476667 | 6.906716667 |
| Gnal          | chr18:67247989-67386445         | 4.356383333 | 17.84421667 |
| Recql5        | chr11:115753908-115794806       | 4.348675    | 6.89382     |
| Serpinh1      | chr7:106493884-106501749        | 4.34788     | 5.800451667 |
| Zdhhc2        | chr8:41509168-41570196          | 4.346853333 | 3.967513333 |
| Zfp438        | chr18:5210028-5334437           | 4.346463333 | 4.852931667 |
| Cpvl          | chr6:53823374-53928656          | 4.344203333 | 0.170028667 |
| Olf998        | chr2:85430666-85431678          | 4.342711333 | 0           |
| Cdkn2c        | chr4:109333480-109337977        | 4.342396667 | 9.87822     |
| Lce3f         | chr3:92796147-92797348          | 4.342136667 | 5.58407     |
| Plxdc2        | chr2:16277948-16673742          | 4.338293333 | 11.45506    |
| Slc25a32      | chr15:38925736-38944262         | 4.337426667 | 3.374203333 |
| Zfp35         | chr18:24148134-24163872         | 4.334236667 | 7.55145     |
| Mpg           | chr11:32126504-32132702         | 4.33378     | 1.32396     |
| Dnahc9        | chr11:65644825-65982053         | 4.333363333 | 0.880868267 |
| 2610027L16Rik | chr14:56364529-56374471         | 4.331481667 | 4.68936     |
| Gpsm1         | chr2:26171052-26203757          | 4.326243333 | 4.304943333 |
|               | 9-Mar chr11:105222111-105318049 | 4.325813333 | 0.691083667 |
| Nudt6         | chr3:37303905-37318512          | 4.32552     | 12.27056867 |
| Ppm1e         | chr11:87040407-87172496         | 4.325323333 | 4.798266667 |
| Kdelr3        | chr15:79346837-79358169         | 4.3249      | 2.182724333 |
| Zfp119b       | chr17:56077797-56084682         | 4.324793333 | 4.146076667 |
| Lym7          | chr11:54652790-54674093         | 4.323536667 | 4.37104     |
| Sh3bp5        | chr14:32187149-32249219         | 4.322876667 | 13.52374667 |
| Has3          | chr8:109394141-109406802        | 4.319716667 | 5.033016667 |
| E330009J07Rik | chr6:40357496-40386132          | 4.31767     | 15.8832     |
| Arrdc2        | chr8:73359036-73363619          | 4.31758     | 4.94671     |
| Fosl1         | chr19:5447697-5455938           | 4.317453333 | 6.70183     |
| Pgcp          | chr15:33012883-33524307         | 4.31671     | 9.619316667 |
| Zfp119a       | chr17:56004191-56018195         | 4.311636667 | 1.809766667 |
| Gpr155        | chr2:73179563-73224455          | 4.31108     | 3.601753    |
| Fbxo47        | chr11:97715620-97745468         | 4.310756667 | 0.809428667 |
| Hist1h2bq     | chr13:21898280-21902068         | 4.30945     | 5.25397     |
| Sgcb          | chr5:74023987-74038970          | 4.308843333 | 10.45462    |
| AA474331      | chr10:39612565-39619044         | 4.308193333 | 0           |
| Cdkn2d        | chr9:21092907-21095653          | 4.306333333 | 7.128736667 |
| Cdkn2d        | chr9:123836859-123839607        | 4.306333333 | 6.96893     |
| 3110082I17Rik | chr5:139835692-139936488        | 4.305       | 10.17693333 |

|               |                           |             |             |
|---------------|---------------------------|-------------|-------------|
| Dbf4          | chr5:8396968-8422716      | 4.304352333 | 2.644720667 |
| Pcdh15        | chr10:73284614-74112477   | 4.304146667 | 2.413441333 |
| 1700066J24Rik | chr4:41464469-41465962    | 4.300416667 | 6.495246667 |
| Gm885         | chr11:106612581-106628882 | 4.299573333 | 1.96537     |
| Pon3          | chr6:5170851-5206233      | 4.295443333 | 5.105577933 |
| Ccl25         | chr8:4325209-4360020      | 4.293668667 | 0.304851667 |
| Gpr137c       | chr14:45839391-45900651   | 4.29116     | 1.343251    |
| Cdc42ep4      | chr11:113588163-113613129 | 4.291063333 | 10.51235    |
| Pcdhb4        | chr18:37467108-37470827   | 4.290783333 | 10.71344333 |
| 6330416G13Rik | chr4:63221393-63247387    | 4.290354333 | 2.67915     |
| 0610009B14Rik | chr12:81787361-81793453   | 4.290253333 | 0.130847667 |
| Fam73b        | chr2:30219752-30241039    | 4.28953     | 3.342516667 |
| Ccdc3         | chr2:5058821-5151912      | 4.2885      | 11.67836333 |
| 2310028H24Rik | chr4:41465961-41516560    | 4.287852    | 1.35234     |
| Gba2          | chr4:43579799-43591736    | 4.286603333 | 6.583636667 |
| Wdsub1        | chr2:59690421-59720663    | 4.283826667 | 8.653513333 |
| Cd37          | chr7:52489001-52494209    | 4.281346667 | 0.469966667 |
| Thop1         | chr10:80532827-80545105   | 4.281322    | 10.97509    |
| Plcg1         | chr2:160557045-160601496  | 4.28099     | 7.22277     |
| Zbtb26        | chr2:37287687-37298641    | 4.279963333 | 4.095856667 |
| Chchd8        | chr7:107685613-107688326  | 4.278753333 | 6.922624333 |
| 1700012D01Rik | chr10:127104178-127105907 | 4.276194333 | 0.115865    |
| Tmprss11a     | chr5:86839434-86898015    | 4.275303333 | 26.61175    |
| Fastkd3       | chr13:68721124-68731156   | 4.274094    | 4.881306667 |
| Blcap         | chr2:157382097-157392097  | 4.27374     | 6.411093333 |
| Pdp2          | chr8:107115367-107120749  | 4.270640667 | 9.32215     |
| Gm16907       | chr13:63390461-63398455   | 4.26664     | 15.52983333 |
| Zkscan17      | chr11:59299022-59320142   | 4.266223333 | 6.13728     |
| Ptgfrn        | chr3:100844158-100914089  | 4.266213333 | 11.35124    |
| Dner          | chr1:84366413-84692796    | 4.2662      | 53.07523333 |
| Plch2         | chr4:154357223-154385093  | 4.264883333 | 8.807946667 |
| 1110034A24Rik | chr12:70290824-70299416   | 4.26355     | 6.569073333 |
| lfrd2         | chr9:107490048-107495369  | 4.26236     | 1.514568    |
| Hspbap1       | chr16:35770471-35828548   | 4.261406667 | 1.301557333 |
| X99384        | chr10:60782404-60846271   | 4.25865     | 9.895983333 |
| Sorbs1        | chr19:40366529-40588302   | 4.25772     | 9.06149     |
| Mndal         | chr1:175787350-175810318  | 4.256083333 | 0.155398667 |
| Gm7120        | chr13:120276845-120284312 | 4.255856667 | 0.547346667 |
| Hist1h2br     | chr13:21925611-21929399   | 4.25447     | 5.050373333 |
| 9430015G10Rik | chr4:155484106-155501372  | 4.254149667 | 5.881266667 |
| 1700010B08Rik | chr2:173544915-173547587  | 4.252763667 | 0.809573667 |
| Sulf1         | chr1:12682510-12850453    | 4.252183333 | 0.327713    |
| Als2cr4       | chr1:59157436-59176940    | 4.251166333 | 3.25167     |
| Xdh           | chr17:74233247-74299522   | 4.248716667 | 3.050492467 |
| Gm4013        | chr18:42434033-42434851   | 4.24639     | 2.125616667 |
| Pitx1         | chr13:55926414-55932786   | 4.245183333 | 14.31386667 |
| Map3k9        | chr12:82815936-82882157   | 4.244486667 | 5.38927     |
| Ddx20         | chr3:105481379-105490489  | 4.23982     | 9.36116     |
| Scel          | chr14:103912557-104012563 | 4.239663333 | 14.24993333 |
| Ephx1         | chr1:182919686-182947626  | 4.23926     | 13.15945333 |
| Cd55          | chr1:132335606-132359317  | 4.238618667 | 6.414793333 |
| Obfc2a        | chr1:51526331-51535243    | 4.235323667 | 4.675216667 |

|               |                           |             |             |
|---------------|---------------------------|-------------|-------------|
| Gm6225        | chr18:3336413-3366861     | 4.235146667 | 0.542823333 |
| Sema3f        | chr9:107583832-107612806  | 4.234363333 | 8.749093333 |
| Bahcc1        | chr11:120094260-120153611 | 4.22998     | 3.328       |
| Slc5a6        | chr5:31338408-31351297    | 4.224543333 | 1.731455667 |
| Psd2          | chr18:36124488-36174369   | 4.22413     | 0           |
| Pus7          | chr5:23246513-23289479    | 4.222926667 | 5.765473    |
| Tlcd1         | chr11:77992267-77994274   | 4.222816667 | 4.782506667 |
| Klhl15        | chrX:91480268-91518854    | 4.220813333 | 5.088431667 |
| Zbtb40        | chr4:136535646-136604610  | 4.220756667 | 1.930867    |
| C530008M17Rik | chr5:77269623-77302579    | 4.220636667 | 5.047166667 |
| Lrtm1         | chr14:29831393-29846828   | 4.220326667 | 0.222403667 |
| Themis        | chr10:28388200-28602555   | 4.219293333 | 1.772759    |
| 1700034H15Rik | chr1:193717950-193731406  | 4.21914     | 2.53583     |
| Prdm15        | chr16:98013073-98072834   | 4.21874     | 7.728776667 |
| Jmjd4         | chr11:59263546-59272069   | 4.218183333 | 7.831646667 |
| Cdon          | chr9:35259660-35315237    | 4.21802     | 4.38527     |
| Rap2b         | chr3:61168428-61172625    | 4.217456667 | 5.440413333 |
| Mettl8        | chr2:70802619-70893663    | 4.217023333 | 2.726815    |
| Srm           | chr4:147965621-147968728  | 4.216563333 | 14.79366667 |
| Hcn4          | chr9:58671318-58708762    | 4.216353333 | 16.97016667 |
| Cog8          | chr8:109572608-109580637  | 4.211333333 | 5.866076667 |
| Sdsl          | chr5:120908210-120922772  | 4.207506667 | 5.51047     |
| Adam28        | chr14:69224083-69273899   | 4.20746     | 5.314319333 |
| Zfp59         | chr7:28623602-28641793    | 4.20694     | 5.649456667 |
| Niacr1        | chr5:124313578-124315525  | 4.205983333 | 3.1269766   |
| Hist1h2ap     | chr13:21924951-21925344   | 4.204226667 | 1.811606804 |
| Mfge8         | chr7:86278653-86293946    | 4.20354     | 11.02546667 |
| Ppp1r35       | chr5:138220145-138221335  | 4.202523333 | 14.22266833 |
| Dhx35         | chr2:158620555-158683950  | 4.200593333 | 2.44385     |
| Tatdn3        | chr1:192869708-192886811  | 4.200333333 | 4.012111333 |
| Smug1         | chr15:102983720-102993715 | 4.199526667 | 8.00939     |
| Dpy19l3       | chr7:36470518-36539473    | 4.197236667 | 4.99648     |
| Esrra         | chr19:6985466-6996298     | 4.193473333 | 1.677666667 |
| Zfp219        | chr14:52625749-52640408   | 4.189806667 | 6.512513333 |
| Iqcb1         | chr16:36828485-36872801   | 4.18973     | 13.88953333 |
| Tmem120b      | chr5:123526283-123567454  | 4.18946     | 5.364973333 |
| Stard4        | chr18:33361074-33373470   | 4.187813333 | 6.95917     |
| Ube2m         | chr7:13620468-13623624    | 4.181853333 | 4.583373333 |
| AA987161      | chr13:67690375-67710644   | 4.181796667 | 6.24309     |
| Slc25a45      | chr19:5878465-5885768     | 4.1807      | 0.717818933 |
| Dll3          | chr7:29078573-29086804    | 4.178936667 | 24.05843333 |
| Fzd6          | chr15:38837825-38869736   | 4.17779     | 17.91473667 |
| Gm13306       | chr4:42349016-42351113    | 4.177443333 | 0.394930816 |
| Cebpd         | chr16:15887378-15889638   | 4.177024    | 3.799213333 |
| Polr1a        | chr6:71859046-71929355    | 4.175176667 | 11.36948667 |
| A630072M18Rik | chr5:20456806-20462216    | 4.1735      | 0.067696333 |
| Trpv3         | chr11:73081121-73110702   | 4.173156667 | 4.65959     |
| Ltbp3         | chr19:5740903-5758532     | 4.172743333 | 9.08939     |
| Elovl6        | chr3:129235303-129341411  | 4.17269     | 10.18183667 |
| Nccrp1        | chr7:29328615-29332273    | 4.171336667 | 10.89122333 |
| 1700001O22Rik | chr2:30651082-30659184    | 4.168324333 | 2.16303     |
| L3mbtl3       | chr10:25995257-26094991   | 4.168220667 | 4.470996667 |

|               |                           |             |             |
|---------------|---------------------------|-------------|-------------|
| Cbwd1         | chr19:24994405-25036106   | 4.166263333 | 7.72528     |
| Gorasp1       | chr9:119834790-119846676  | 4.164923333 | 4.031406667 |
| Polr1b        | chr2:128926731-128952331  | 4.16445     | 1.511697    |
| Slc2a8        | chr2:32828508-32837576    | 4.15288     | 6.73503     |
| Nob1          | chr8:109936388-109948938  | 4.15284     | 2.923037667 |
| Mmab          | chr5:114881042-114894036  | 4.150843333 | 9.5042      |
| Col25a1       | chr3:129883762-130302801  | 4.1487      | 3.351025667 |
| Trpt1         | chr19:7070620-7073536     | 4.147866667 | 34.9549     |
| Tmem150c      | chr5:100506891-100588827  | 4.14754     | 4.098046333 |
| Cln2          | chr16:20703038-20716709   | 4.14703     | 6.262593333 |
| Pcdhb7        | chr18:37501355-37504861   | 4.14661     | 2.318006667 |
| Ecsr          | chr18:35872742-35881145   | 4.146029333 | 0           |
| Cln3          | chr7:133714913-133727794  | 4.144883333 | 14.01471333 |
| Bckdhb        | chr9:83842387-84017847    | 4.144226667 | 12.2408     |
| Incenp        | chr19:9946786-9974023     | 4.141724667 | 3.4426      |
| Stradb        | chr1:59030414-59051965    | 4.141176667 | 5.874583333 |
| Gm14434       | chr2:176266768-176283149  | 4.138836667 | 1.5279      |
| 2210015D19Rik | chr11:5662152-5684713     | 4.138653333 | 4.140116667 |
| Wwc2          | chr8:48912963-49075905    | 4.138083333 | 1.160039    |
| Zfp697        | chr3:98186403-98235872    | 4.137756333 | 0.038232267 |
| Pcdhga6       | chr18:37866882-38001524   | 4.13696     | 2.733771667 |
| Slc38a7       | chr8:98359822-98377391    | 4.13664     | 2.000764333 |
| Cap2          | chr13:46597271-46745650   | 4.135256667 | 1.300588067 |
| Srrd          | chr5:112766410-112772060  | 4.13286     | 0.557599667 |
| Plcx2         | chr16:45959373-46010526   | 4.1316      | 1.371784667 |
| Elk1          | chrX:20510520-20527726    | 4.12983     | 6.542896667 |
| Ldlr          | chr9:21528019-21554362    | 4.129026667 | 23.86846667 |
| Agbl2         | chr2:90622900-90656388    | 4.128513333 | 53.5575     |
| Arpp21        | chr9:111967594-112137345  | 4.12522     | 0.0164025   |
| Fads1         | chr19:10257377-10271362   | 4.124993333 | 6.9772      |
| Zfp287        | chr11:62524987-62542595   | 4.123183333 | 3.032016667 |
| Plin2         | chr4:86302468-86315963    | 4.12262     | 7.20334     |
| 4933433F19Rik | chr8:31678866-31686045    | 4.122426667 | 0           |
| Twistnb       | chr12:34114488-34124245   | 4.1216      | 6.064976667 |
| Slc25a42      | chr8:72708238-72736180    | 4.116823333 | 2.930603333 |
| Galnt7        | chr8:60002621-60131852    | 4.11543     | 9.56378     |
| Mppe1         | chr18:67385183-67405484   | 4.113883333 | 1.055741    |
| Tbc1d9        | chr8:85689250-85796839    | 4.112733333 | 10.18604333 |
| Fam124a       | chr14:63174573-63227322   | 4.11238     | 7.069138667 |
| Kcnmb4        | chr10:115854923-115910579 | 4.109963672 | 1.914987    |
| Abl2          | chr1:158488917-158579750  | 4.106683333 | 6.566756667 |
| Thbs3         | chr3:89019108-89030759    | 4.105703333 | 12.38078    |
| Ccdc77        | chr6:120274339-120314387  | 4.10426     | 1.55978     |
| Ears2         | chr7:129182334-129210577  | 4.103646667 | 3.660525    |
| Pycr2         | chr1:182834404-182838219  | 4.100672    | 7.232351333 |
| LOC626049     | chr1:108049201-108068101  | 4.099231    | 0           |
| Mcm6          | chr1:130228167-130256233  | 4.09736     | 3.175523    |
| Fbxw8         | chr5:118514989-118605467  | 4.092186667 | 4.84193     |
| Ppp1r1b       | chr11:98210051-98219109   | 4.083830333 | 10.09332267 |
| Heatr5a       | chr12:52976859-53072308   | 4.083566667 | 1.774832333 |
| Fbxl2         | chr9:113886075-113935869  | 4.08174     | 2.52691     |
| Cnm4          | chr1:36528441-36565621    | 4.080903333 | 4.968863333 |

|               |                           |             |             |
|---------------|---------------------------|-------------|-------------|
| Zfa           | chr10:52262125-52265545   | 4.080596667 | 2.039756667 |
| Spata9        | chr13:76105186-76136416   | 4.07988     | 6.611323333 |
| Degs1         | chr1:184205900-184212890  | 4.07974     | 17.61433333 |
| D16H22S680E   | chr16:18300917-18344025   | 4.079703333 | 4.89233     |
| Polg          | chr7:86594268-86611159    | 4.078016667 | 6.609486667 |
| Gm14477       | chrX:10885949-10886267    | 4.074039333 | 0.0135858   |
| Mkl1          | chr15:80842710-81021187   | 4.072066667 | 8.08742     |
| Zfp579        | chr7:4944453-4947703      | 4.07064     | 3.20902     |
| Ppp1r18       | chr17:36002539-36012541   | 4.070317    | 2.403158333 |
| Ubash3b       | chr9:40821723-40965577    | 4.06917     | 3.062891667 |
| Cdc42ep5      | chr7:4102861-4116301      | 4.06836     | 25.22814333 |
| Capn10        | chr1:94830984-94844525    | 4.066733333 | 5.16861     |
| 1700011J10Rik | chr2:72817488-72827306    | 4.06631     | 7.605566667 |
| Gnaz          | chr10:74429975-74478622   | 4.065815667 | 2.395848    |
| 4921530L18Rik | chr2:13991959-13995561    | 4.063053333 | 1.874353333 |
| Kazald1       | chr19:45150628-45153779   | 4.060891    | 3.618792333 |
| Rasef         | chr4:73360482-73436506    | 4.05984     | 9.404393333 |
| Ankrd26       | chr6:118452581-118512274  | 4.058526667 | 5.500913333 |
| Slc26a11      | chr11:119216870-119242390 | 4.05774     | 3.197869667 |
| Cyp4f39       | chr17:32589667-32630265   | 4.057048667 | 7.369506667 |
| lfitm1        | chr7:148153327-148155726  | 4.056543333 | 45.75172    |
| Pik3ip1       | chr11:3230733-3242974     | 4.05583     | 14.40187667 |
| 9930104L06Rik | chr4:124614291-124621905  | 4.050576667 | 2.125166667 |
| Urb1          | chr16:90751771-90810658   | 4.049613333 | 1.953048333 |
| Gale          | chr4:135521079-135524093  | 4.046731333 | 7.419073333 |
| 2410127L17Rik | chr19:18745269-18779282   | 4.046046667 | 7.87256     |
| 4933433C11Rik | chr2:25068078-25070150    | 4.045248    | 4.273538    |
| Id4           | chr13:48356795-48359405   | 4.043756667 | 16.35956667 |
| Rab3d         | chr9:21711954-21722565    | 4.0437      | 14.15716667 |
| Arv1          | chr8:127246038-127258023  | 4.04264     | 6.88529     |
| Sh2b3         | chr5:122267223-122286810  | 4.042017    | 1.901694    |
| Lbh           | chr17:73267644-73291286   | 4.04201     | 15.31394667 |
| Nudcd2        | chr11:40547143-40553549   | 4.040806667 | 4.305423333 |
| Igsf9         | chr1:174412343-174429008  | 4.040013333 | 12.95135    |
| Krt85         | chr15:101346118-101521940 | 4.036466667 | 11.17355333 |
| Ccnd2         | chr6:127075726-127101066  | 4.03283     | 18.09386333 |
| Rims2         | chr15:39029831-39515918   | 4.027353333 | 7.260333333 |
| 4921517L17Rik | chr2:156138208-156201374  | 4.022323333 | 1.803663333 |
| Morn1         | chr4:154460685-154519616  | 4.021033333 | 1.981919333 |
| Gm11818       | chr4:12833983-12908632    | 4.019926667 | 2.695055467 |
| Ankrd24       | chr10:81091284-81110357   | 4.019603333 | 3.807793333 |
| Pparg         | chr6:115311238-115440419  | 4.015916667 | 0.894042667 |
| Alg8          | chr7:104520126-104540668  | 4.015320667 | 20.26703    |
| Dock3         | chr9:106795155-107134240  | 4.014296667 | 1.053505    |
| D10Jhu81e     | chr10:77624811-77632513   | 4.013573333 | 2.865878    |
| Prim2         | chr1:33510655-33726603    | 4.012626667 | 0.8434582   |
| P2ry14        | chr3:58918546-58934546    | 4.01022     | 1.028149667 |
| Myof          | chr19:37973525-38118067   | 4.009893333 | 10.09253333 |
| Umps          | chr16:33955097-33967089   | 4.007957667 | 10.95886    |
| Cish          | chr9:107199019-107204292  | 4.006616667 | 7.434438467 |
| LOC433944     | chr5:120135096-120141227  | 4.00568     | 11.87138667 |
| Sqrdl         | chr2:122591094-122635287  | 4.005606667 | 18.30464667 |

|               |                           |             |             |
|---------------|---------------------------|-------------|-------------|
| Kif6          | chr17:49754496-50049172   | 4.00232     | 0.858993333 |
| Stoml1        | chr9:58100970-58110331    | 4.002243333 | 3.421656667 |
| Rbm24         | chr13:46513668-46526468   | 4.0021      | 13.69944667 |
| Slx4          | chr16:3979122-4001680     | 4.001886667 | 5.468376667 |
| 9830001H06Rik | chr2:156836177-156905001  | 4.00019     | 9.89717     |
| Ccdc46        | chr11:108286579-108721929 | 3.99925     | 3.378166667 |
| Txndc11       | chr16:11075003-11134625   | 3.99754     | 11.53597333 |
| Kti12         | chr4:108520461-108522017  | 3.993213333 | 7.686616667 |
| Sepn1         | chr4:134093806-134108081  | 3.993063333 | 7.717733333 |
| Arhgap33      | chr7:31307244-31320028    | 3.992154    | 2.605361333 |
| 4930444A02Rik | chr8:27091075-27104593    | 3.991763333 | 7.528663333 |
| Ccdc88c       | chr12:102150909-102267193 | 3.99024     | 3.567953333 |
| Osgepl1       | chr1:53370506-53380908    | 3.98846     | 5.33246     |
| Wbscr25       | chr5:135463302-135477220  | 3.987199333 | 0.287586067 |
| Zfp524        | chr7:4967109-4970090      | 3.9855      | 5.606853333 |
| Ppp1r3f       | chrX:7135687-7151246      | 3.985308333 | 2.1944      |
| 2700038G22Rik | chr5:23356414-23360851    | 3.984523333 | 1.210913333 |
| 4930511A02Rik | chr12:11445038-11451618   | 3.980926667 | 0.0246768   |
| 0610043K17Rik | chr4:101026387-101071790  | 3.979371667 | 0.995083333 |
| Sectm1b       | chr11:120914736-120924883 | 3.973848    | 4.882016667 |
| Sntb2         | chr8:109459649-109538092  | 3.973212333 | 8.89598     |
| Ace2          | chrX:160577273-160626350  | 3.970844667 | 10.56951333 |
| Alox15        | chr11:70157648-70165533   | 3.968158    | 11.42671293 |
| Dnajb3        | chr1:90101306-90102323    | 3.967826667 | 5.097851    |
| Wwc1          | chr11:35652679-35793591   | 3.96739     | 5.033416667 |
| Dolpp1        | chr2:30247935-30256047    | 3.963616667 | 4.464243333 |
| Rdh10         | chr1:16095962-16122631    | 3.963003333 | 6.061163333 |
| Bglap2        | chr3:88181657-88182621    | 3.957506667 | 413.5813333 |
| Gpr98         | chr13:81234066-81772143   | 3.956006667 | 0.910829    |
| Tmem63a       | chr1:182872648-182905235  | 3.95292     | 7.887033333 |
| Gch1          | chr14:47773569-47809077   | 3.952863333 | 4.11735     |
| Tsix          | chrX:100626855-100680296  | 3.952413667 | 0.112710395 |
| Lipe          | chr7:26164545-26181006    | 3.949123333 | 5.50073     |
| Dvl2          | chr11:69814127-69823611   | 3.94886     | 1.66178     |
| BC051226      | chr17:34045126-34046123   | 3.947586667 | 2.031916667 |
| Elk3          | chr10:92710160-92773904   | 3.943573333 | 4.369106667 |
| Gm129         | chr3:95682427-95686151    | 3.942630667 | 2.0411714   |
| Epn3          | chr11:94350912-94361288   | 3.94133     | 6.555046667 |
| Gpr68         | chr12:102114891-102146408 | 3.941109667 | 0.689618333 |
| lqsec2        | chrX:148578810-148659779  | 3.94099     | 6.625666667 |
| Snrpd3        | chr10:74980786-74998185   | 3.937893333 | 17.25118667 |
| Slc35e4       | chr11:3807024-3814667     | 3.937873333 | 5.626613667 |
| Sytl3         | chr17:6877959-6942393     | 3.936496667 | 14.93342667 |
| Dnajb7        | chr15:81237517-81238703   | 3.935902333 | 0.103416    |
| Gbp3          | chr3:142223015-142236176  | 3.933579667 | 1.891116    |
| Gla           | chrX:131122707-131135544  | 3.932395333 | 5.74394     |
| Nup37         | chr10:87609736-87641140   | 3.931635667 | 1.419403333 |
| Slc38a9       | chr13:113450973-113528960 | 3.93075     | 4.829496667 |
| Dimt1         | chr13:107737208-107750304 | 3.929426667 | 4.42789     |
| Mipep         | chr14:61403402-61524317   | 3.9259      | 8.14287     |
| Unc119b       | chr5:115572574-115584984  | 3.92574     | 8.12131     |
| Caprin2       | chr6:148791033-148844648  | 3.924953333 | 3.775393333 |

|               |                           |             |             |
|---------------|---------------------------|-------------|-------------|
| C330006K01Rik | chr5:142939884-142954669  | 3.924463333 | 4.750226667 |
| Ribc1         | chrX:148439126-148450838  | 3.923033333 | 2.287505333 |
| Rbm19         | chr5:120566521-120648980  | 3.921646667 | 2.165919333 |
| Vldlr         | chr19:27291509-27328721   | 3.921386667 | 1.451799    |
| Tmem132a      | chr19:10932318-10944269   | 3.919443333 | 10.94894667 |
| Cpsf4         | chr5:145928092-145942909  | 3.916412333 | 1.81063     |
| Runx2         | chr17:44740949-44951746   | 3.916326667 | 54.43933333 |
| A430090L17Rik | chr13:114914555-114941800 | 3.915596667 | 1.45924     |
| Fbxl18        | chr5:143633467-143656917  | 3.914393333 | 2.122646667 |
| Sh2d3c        | chr2:32576574-32610527    | 3.914336667 | 3.879709    |
| C920021L13Rik | chr3:95675444-95693016    | 3.914106    | 0.177523333 |
| 1700105P06Rik | chr19:7457492-7458047     | 3.911833333 | 0           |
| 9230114K14Rik | chr5:52581919-52589223    | 3.911153333 | 4.976686667 |
| Pstk          | chr7:138514659-138531352  | 3.910691    | 3.200840667 |
| Tmcc2         | chr1:134252891-134287858  | 3.910576    | 1.520058333 |
| Abcb10        | chr8:126476358-126507022  | 3.91042     | 8.398313333 |
| Prkce         | chr17:86567124-87057259   | 3.90962     | 6.20171     |
| Krt79         | chr15:101759762-101770755 | 3.904136667 | 1.358266    |
| Scn5a         | chr9:119392525-119488134  | 3.90413     | 6.77626     |
| Adamts11      | chr4:85699818-86074286    | 3.901573333 | 2.054934667 |
| Tdp2          | chr13:24923527-24934022   | 3.90124     | 8.232863333 |
| Gm4944        | chr17:22334231-22362581   | 3.900416667 | 1.27583     |
| Mtmr7         | chr8:41635512-41720146    | 3.89985     | 3.070973335 |
| 1700018L24Rik | chr8:11840520-11855761    | 3.8991      | 0           |
| Hexdc         | chr11:121065746-121083970 | 3.897036667 | 4.390856667 |
| Mrpl15        | chr1:4763278-4775807      | 3.89293     | 2.120878    |
| Thsd7b        | chr1:131169880-132115855  | 3.890893333 | 0.007043133 |
| Nr2f2         | chr7:77496835-77511632    | 3.890796667 | 4.863353333 |
| Tctn1         | chr5:122691523-122714469  | 3.885653333 | 5.546836667 |
| Chac2         | chr11:30876708-30886365   | 3.884403333 | 4.603886667 |
| Ppil3         | chr1:58487836-58502330    | 3.883816667 | 12.40370333 |
| Cdc42ep3      | chr17:79733364-79754431   | 3.882433333 | 4.353284667 |
| Efnb2         | chr8:8617438-8660773      | 3.88073     | 10.29384    |
| Rarg          | chr15:102065370-102087914 | 3.878886667 | 8.376543333 |
| Zfp52         | chr17:21672502-21699565   | 3.878333333 | 3.11678     |
| Capn3         | chr2:120289328-120330655  | 3.876573333 | 11.92381667 |
| Rnf138        | chr18:21159841-21186724   | 3.873506667 | 4.316293    |
| Slc16a6       | chr11:109312169-109334910 | 3.871553333 | 2.26057     |
| Pcdhb8        | chr18:37514924-37517264   | 3.869066333 | 6.786015    |
| Bad           | chr19:7016344-7026383     | 3.868173333 | 6.10315     |
| Qpct          | chr17:79451245-79489583   | 3.854403333 | 0.157012    |
| B3gat1        | chr9:26559146-26568923    | 3.853126667 | 0.96809     |
| Sh3kbp1       | chrX:156065339-156413849  | 3.852435    | 13.82600333 |
| Zfp688        | chr7:134562479-134565548  | 3.852146667 | 2.696181667 |
| Cdk5rap2      | chr4:69884057-70071401    | 3.851056667 | 5.53147     |
| Dgcr6         | chr16:18052952-18071435   | 3.850296667 | 6.86995     |
| Sap30l        | chr11:57615138-57624117   | 3.847973333 | 4.378506667 |
| Kif13b        | chr14:65271367-65425133   | 3.84783     | 3.838306667 |
| Gpr19         | chr6:134819110-134847943  | 3.84593     | 5.722133333 |
| Nxn           | chr11:76070727-76212643   | 3.845153333 | 13.98541667 |
| Adprhl2       | chr4:125993594-125998947  | 3.844023    | 3.401433333 |
| Adhfe1        | chr1:9538126-9568049      | 3.842326667 | 13.08529667 |



|               |                           |             |             |
|---------------|---------------------------|-------------|-------------|
| Nfkbil1       | chr17:35357119-35372760   | 3.84163     | 0.188544333 |
| Glyat         | chr19:12707797-12726227   | 3.840163333 | 0           |
| Lrfn4         | chr19:4611783-4615667     | 3.838493333 | 4.314893333 |
| Nudcd1        | chr15:44206772-44259853   | 3.838316667 | 2.268773    |
| 4831440E17Rik | chr5:25005614-25010291    | 3.836623333 | 2.438263333 |
| Zfp787        | chr7:6083090-6107573      | 3.833149    | 6.88099     |
| Gm5796        | chr14:4126976-4144402     | 3.830636667 | 2.73995     |
| Pcp4          | chr16:96689212-96747400   | 3.829786667 | 6.530413333 |
| Gm3414        | chr5:46110905-46118817    | 3.82976     | 3.324513333 |
| 1700040L02Rik | chr10:67893703-68004623   | 3.829591    | 3.06648     |
| Rcbtb2        | chr14:73542316-73583861   | 3.82891     | 8.305196667 |
| Zfp82         | chr7:30841052-30857842    | 3.823186667 | 5.674400333 |
| Nupl2         | chr5:23670780-23689826    | 3.821363333 | 7.530156667 |
| Mob3a         | chr10:80147997-80164565   | 3.814083333 | 6.294086667 |
| Kif5a         | chr10:126662750-126700419 | 3.81122     | 6.211593333 |
| 2810008M24Rik | chr13:108834667-108839340 | 3.806603333 | 11.42534333 |
| 4930534B04Rik | chr12:92236931-92622849   | 3.805327333 | 5.84534     |
| Tef           | chr15:81633102-81657293   | 3.804123333 | 5.544113333 |
| Gigyf1        | chr5:137960107-137969163  | 3.804053333 | 6.961413333 |
| Ctu1          | chr7:50927400-50933667    | 3.803594    | 2.200043333 |
| Tinf2         | chr14:56297917-56300654   | 3.8034      | 7.229253333 |
| Tdrkh         | chr3:94217239-94235421    | 3.799030667 | 5.518353667 |
| Nkrf          | chrX:34427536-34442894    | 3.798246667 | 10.31203333 |
| Dars2         | chr1:162970743-163000763  | 3.797586667 | 4.782446667 |
| Them4         | chr3:94114053-94136454    | 3.79697     | 2.900186667 |
| Grm2          | chr9:106546865-106558440  | 3.795873333 | 6.01955     |
| Pin1          | chr9:20456573-20471028    | 3.794493333 | 1.727522667 |
| Jub           | chr14:55186305-55196498   | 3.792596    | 5.67892     |
| Tnfrsf9       | chr4:150294263-150320211  | 3.789186667 | 0.42447     |
| Atp8b2        | chr3:89743402-89767430    | 3.788753333 | 4.413473333 |
| Mum1          | chr10:79689342-79707889   | 3.78857     | 3.390296667 |
| Fbxo10        | chr4:45047119-45097476    | 3.78686     | 2.884386667 |
| Zc3h8         | chr2:128752003-128769756  | 3.786697667 | 10.71197    |
| 4930414L22Rik | chr6:72388676-72390609    | 3.786416667 | 0.930476    |
| Ubtd1         | chr19:42056252-42109131   | 3.78119     | 3.359811    |
| Paox          | chr7:147311583-147320233  | 3.781081333 | 2.35775     |
| Ttc18         | chr14:21213411-21271447   | 3.78044     | 3.663763333 |
| Ctns          | chr11:72996634-73012521   | 3.77628     | 7.407263333 |
| Serpib1a      | chr13:32933960-32943054   | 3.775776667 | 4.906713667 |
| Kcnj3         | chr2:55289566-55447936    | 3.774968533 | 0.118491567 |
| Idh2          | chr7:87239733-87260236    | 3.77273     | 17.12094333 |
| Plxna3        | chrX:71574404-71590028    | 3.772266667 | 8.162496667 |
| Tgif2         | chr2:156665812-156681267  | 3.770676667 | 3.158976667 |
| Gins3         | chr8:98157458-98168959    | 3.769943333 | 6.656166333 |
| Zfp934        | chr13:62618156-62659959   | 3.769343333 | 0.338666667 |
| Susd3         | chr13:49326199-49344075   | 3.76916     | 0.663493333 |
| Slc24a1       | chr9:64770667-64799414    | 3.765933333 | 0.354588667 |
| 2210414B05Rik | chr4:3583652-3590255      | 3.759983333 | 0.506776667 |
| Fam123b       | chrX:92615652-92640179    | 3.75988     | 4.443256667 |
| Shpk          | chr11:73012983-73038008   | 3.759393333 | 5.304786667 |
| Slc15a2       | chr16:36750249-36785048   | 3.75878     | 13.28017    |
| Pgm2          | chr4:99602055-99659899    | 3.758206667 | 13.57973333 |

|               |                           |             |             |
|---------------|---------------------------|-------------|-------------|
| Mybph         | chr1:136090024-136097809  | 3.756453333 | 5.64179     |
| Eya2          | chr2:165480797-165597131  | 3.756143333 | 5.385975333 |
| BC068281      | chr12:4850108-4863773     | 3.755945    | 5.955686667 |
| LOC100642166  | chr5:110362581-110370729  | 3.752586667 | 4.108738    |
| Zfp41         | chr15:75447114-75455725   | 3.751216667 | 0.924205667 |
| Ddx25         | chr9:35349432-35366055    | 3.75081     | 2.026826667 |
| D430020J02Rik | chr12:117640419-117643634 | 3.750663333 | 4.310690467 |
| Gstm2         | chr3:107784619-107789354  | 3.7486      | 15.26239    |
| 5930416I19Rik | chr6:128307017-128312915  | 3.746903333 | 5.213123333 |
| Slc9a6        | chrX:53863011-53917407    | 3.746233333 | 7.744316667 |
| 1700017B05Rik | chr9:57100128-57110406    | 3.745863333 | 71.08993333 |
| 4933407K13Rik | chrX:72970796-73010038    | 3.744933333 | 3.051453333 |
| Pld6          | chr11:59597394-59601159   | 3.743005    | 2.945504667 |
| Arid5a        | chr1:36364577-36380874    | 3.74253     | 2.574916667 |
| Zfp111        | chr7:24978233-24993168    | 3.740773333 | 3.58411     |
| 1700084E18Rik | chr2:30092717-30093151    | 3.739646667 | 3.458433333 |
| Bin1          | chr18:32536870-32595394   | 3.737010667 | 4.504246667 |
| Elac2         | chr11:64792536-64815578   | 3.73588     | 6.340426667 |
| Pex5          | chr6:124346833-124365085  | 3.731351333 | 5.730746667 |
| Mterf         | chr5:3890580-3893933      | 3.72889     | 3.92884     |
| Slx1b         | chr7:133832440-133839297  | 3.727056667 | 2.99559     |
| Gm4285        | chr14:76242724-76244771   | 3.727006667 | 0.667080333 |
| 2400009B08Rik | chr8:3671184-3672321      | 3.72698     | 2.213993333 |
| Irak4         | chr15:94374090-94398747   | 3.725566667 | 4.604590333 |
| Star          | chr8:26918984-26926454    | 3.72445     | 5.50229     |
| Ndrp2         | chr14:52524945-52533163   | 3.723886667 | 31.1019     |
| Agl           | chr3:116442916-116511084  | 3.721163333 | 3.488926667 |
| Tmco1         | chr1:169238800-169264109  | 3.7196      | 4.65789     |
| Ccdc107       | chr4:43506236-43508793    | 3.715318    | 10.83953433 |
| Galnt14       | chr7:118615174-118923491  | 3.714406667 | 2.820653333 |
| Zdhhc18       | chr4:133162906-133189344  | 3.714076667 | 12.6711     |
| Igsf21        | chr4:139582766-139802726  | 3.7138      | 5.848456667 |
| Pola2         | chr19:5940542-5964206     | 3.713276333 | 2.32884     |
| Aldoc         | chr11:78137699-78140262   | 3.712666667 | 2.83761     |
| Abcb9         | chr5:124511865-124545807  | 3.712120333 | 1.276461267 |
| Abl1          | chr2:31544075-31659747    | 3.71143     | 6.824266667 |
| Lynx1         | chr15:74578285-74583409   | 3.709616667 | 5.915916667 |
| Sv2a          | chr3:95985149-95999103    | 3.70946     | 13.73659667 |
| Hist1h3h      | chr13:21809496-21809984   | 3.709023333 | 1.843106667 |
| Pla2g4b       | chr2:119859168-119868768  | 3.708206667 | 6.04014     |
| Nr2c1         | chr10:93610675-93659959   | 3.7082      | 10.80395667 |
| Fgfr2         | chr7:137305964-137410322  | 3.705216667 | 16.97277333 |
| Stx1a         | chr5:135499441-135526969  | 3.70521     | 3.93275     |
| Kcnc1         | chr7:53651837-53694074    | 3.70454     | 47.90873333 |
| Tgfb1         | chr13:56710963-56740700   | 3.704303333 | 8.025136667 |
| Abra          | chr15:41696838-41701266   | 3.70083     | 2.121354333 |
| B130006D01Rik | chr11:95584899-95588087   | 3.700594    | 1.430831333 |
| Fam173b       | chr15:31531870-31547290   | 3.698396667 | 4.25315     |
| Ppp1r14d      | chr2:119043858-119055601  | 3.696886333 | 0           |
| Fkbp5         | chr17:28536039-28623057   | 3.696363333 | 1.898867    |
| Atp7b         | chr8:23104819-23170546    | 3.695163333 | 3.197715    |
| Gan           | chr8:119682034-119729086  | 3.694293333 | 5.07701     |

|               |                           |             |             |
|---------------|---------------------------|-------------|-------------|
| Tmem71        | chr15:66357773-66392608   | 3.69401     | 0.7650726   |
| Ccnyl1        | chr1:64737918-64772216    | 3.6916      | 4.186946667 |
| Plekha8       | chr6:54545104-54595816    | 3.691086667 | 5.50811     |
| Bend3         | chr10:43198945-43235223   | 3.69032     | 4.388876667 |
| Ccdc96        | chr5:36827236-36830820    | 3.68823     | 1.206627333 |
| Zfp420        | chr7:30644997-30662321    | 3.686863333 | 2.083773333 |
| Epha6         | chr16:59653308-60605357   | 3.68602     | 0.031898267 |
| Otub2         | chr12:104615103-104644560 | 3.684933333 | 2.175462667 |
| Mipol1        | chr12:58331411-58558228   | 3.68167     | 5.22468     |
| Cox11         | chr11:90499497-90507291   | 3.68161     | 1.903263333 |
| Ebpl          | chr14:61958599-61979282   | 3.681184333 | 0.616219933 |
| Gmds          | chr13:31911454-32430413   | 3.679286667 | 12.57048    |
| Tubd1         | chr11:86358492-86380862   | 3.674049667 | 2.267694333 |
| Mrps11        | chr7:85928016-85937874    | 3.673733333 | 2.881817    |
| Fmo2          | chr1:164805177-164828843  | 3.673236    | 3.101876667 |
| 2010109K11Rik | chr12:33063653-33067808   | 3.67138     | 6.332526667 |
| 2810408I11Rik | chr1:64726442-64737233    | 3.670018333 | 0           |
| Acn9          | chr6:6906017-6989220      | 3.668696667 | 5.272806667 |
| B3gnt9-ps     | chr8:107776537-107779051  | 3.668041333 | 2.148500333 |
| Plip          | chr8:97198794-97220142    | 3.668003333 | 5.555211333 |
| Prmt6         | chr3:110049027-110053916  | 3.666104333 | 8.631583333 |
| Ptdss2        | chr7:148317184-148342053  | 3.663963333 | 4.856796667 |
| Hmgcl         | chr4:135502367-135518532  | 3.663933333 | 1.930003333 |
| Mfsd11        | chr11:116715328-116736951 | 3.66289     | 8.20305     |
| AU041133      | chr10:81590757-81615810   | 3.662823333 | 1.71993     |
| Prss12        | chr3:123149830-123209520  | 3.661959333 | 1.480644333 |
| 1110054M08Rik | chr16:24392641-24393741   | 3.65325     | 1.252417667 |
| Pomc          | chr12:3954950-3960618     | 3.65262     | 1.613516667 |
| Ppih          | chr4:118972614-118993128  | 3.6503      | 6.80198     |
| Fmo3          | chr1:164883930-164914622  | 3.647619    | 14.43183333 |
| 3110056O03Rik | chr10:80318019-80331453   | 3.646362667 | 4.990866667 |
| Arhgef9       | chrX:92244282-92361825    | 3.645113333 | 3.046393    |
| Mcm4          | chr16:15623989-15637493   | 3.644176667 | 2.547256667 |
| Narfl         | chr17:25910720-25920277   | 3.6438      | 4.199246667 |
| Wdr24         | chr17:25960571-25965675   | 3.643493667 | 2.521336333 |
| Vangl1        | chr3:101960618-102008616  | 3.642913333 | 7.155956667 |
| Nlgn2         | chr11:69636624-69648351   | 3.63987     | 16.65213333 |
| Ahcy          | chr2:154885047-154900233  | 3.638513333 | 4.76164     |
| 2310011J03Rik | chr10:79780999-79783293   | 3.637606667 | 8.722556667 |
| Thns1         | chr2:21127350-21136636    | 3.632903333 | 2.926768333 |
| D830029L11    | chr18:16974915-16981292   | 3.631290233 | 0           |
| Toe1          | chr4:116476607-116480164  | 3.629403333 | 0.520679667 |
| 9130230L23Rik | chr5:66379166-66395524    | 3.629206667 | 1.924066667 |
| BC030336      | chr7:127821133-127878368  | 3.62727     | 4.12256     |
| Paqr8         | chr1:20880702-20928837    | 3.626532    | 2.417012667 |
| Ovol1         | chr19:5549136-5560575     | 3.62628     | 10.63642667 |
| 9430091E24Rik | chr8:113651343-113669398  | 3.626216667 | 1.450517333 |
| Ugt1a6a       | chr1:90031383-90116577    | 3.62309     | 6.576779333 |
| Fam175a       | chr5:101233820-101249954  | 3.61981     | 8.779756667 |
| Pgam2         | chr11:5701639-5703799     | 3.619036667 | 4.676676667 |
| Inpp5a        | chr7:146575007-146765551  | 3.61839     | 5.898666667 |
| Dnlz          | chr2:26203637-26207630    | 3.61662     | 7.953674333 |

|               |                           |             |             |
|---------------|---------------------------|-------------|-------------|
| Trib2         | chr12:15798532-15823591   | 3.61629     | 14.4437     |
| Art1          | chr7:109250256-109259662  | 3.615727333 | 0           |
| Tmem115       | chr9:107436275-107440987  | 3.615356667 | 3.17815     |
| Ripk2         | chr4:16050521-16090645    | 3.61467     | 9.0869      |
| Lbr           | chr1:183745445-183772532  | 3.6133      | 12.89742333 |
| Prkd3         | chr17:79348744-79420156   | 3.612536667 | 7.611946667 |
| Zfp958        | chr8:4613169-4630231      | 3.61207     | 2.497563333 |
| Yars2         | chr16:16303057-16309733   | 3.607043333 | 4.5432      |
| 1700001P01Rik | chr11:97632794-97637232   | 3.606843333 | 1.546243333 |
| Gm5803        | chr15:22643574-22644739   | 3.603273333 | 4.65725     |
| Pgbd1         | chr13:21513143-21532922   | 3.602466667 | 1.295469    |
| Pex12         | chr11:83108146-83112479   | 3.601106667 | 5.205913333 |
| I830012O16Rik | chr19:34682446-34687891   | 3.600072333 | 0.60029     |
| Mrpl35        | chr6:71762990-71773778    | 3.59894     | 3.55068     |
| Rps6ka1       | chr4:133403205-133443714  | 3.59361     | 7.00264     |
| Asb1          | chr1:93437141-93456167    | 3.589693333 | 3.89457     |
| Zfp946        | chr17:22561234-22593656   | 3.586146667 | 1.557812667 |
| Lrriq1        | chr10:102525831-102698956 | 3.586006667 | 5.400936667 |
| 1700036G14Rik | chr3:85121440-85135949    | 3.5855      | 0           |
| Naglu         | chr11:100931407-100938985 | 3.585396667 | 4.065583333 |
| Flt3l         | chr7:52386558-52391802    | 3.585326667 | 6.281813333 |
| Pdxk          | chr10:77899491-77927693   | 3.582836667 | 4.622621    |
| BC026585      | chr1:159388712-159418864  | 3.577933    | 0.624733333 |
| Sult1c1       | chr17:54100939-54129956   | 3.577890333 | 1.345193333 |
| Gm13032       | chr4:140366907-140373426  | 3.577576667 | 1.528629383 |
| Il1f6         | chr2:24070936-24081221    | 3.577433333 | 5.11769     |
| Als2cl        | chr9:110782677-110803034  | 3.576413333 | 2.090554467 |
| Zfp607        | chr7:28645603-28665844    | 3.57623     | 3.110446667 |
| Fam102b       | chr3:108773914-108830525  | 3.5728      | 6.3168361   |
| Zfp472        | chr17:33102775-33116156   | 3.57225     | 2.154856667 |
| 1700017J07Rik | chr2:168803768-168804406  | 3.570696667 | 0           |
| Adora1        | chr1:136095798-136132008  | 3.56803     | 10.83717667 |
| Spata17       | chr1:188872285-189039325  | 3.566653333 | 1.162060833 |
| Fam33a        | chr11:86922762-86936476   | 3.565436667 | 4.46227     |
| Slc5a1        | chr5:33446867-33505348    | 3.565256667 | 3.39271     |
| Map3k10       | chr7:28441395-28459617    | 3.56425     | 1.671904333 |
| Sidt1         | chr16:44240292-44332951   | 3.562753333 | 0.332154633 |
| Ptpm          | chr17:67016187-67703799   | 3.562486667 | 1.511523333 |
| Tor3a         | chr1:158583747-158604470  | 3.560213333 | 9.138592333 |
| Tagap         | chr17:8118864-8127762     | 3.558276667 | 1.113678    |
| Fez2          | chr17:78777224-78817443   | 3.55637     | 3.489210333 |
| Siah1b        | chrX:160508634-160513981  | 3.555626667 | 3.905413333 |
| Mbtps2        | chrX:153985753-154036647  | 3.554283333 | 7.922076667 |
| Slc7a6        | chr8:108692774-108722604  | 3.552936667 | 7.280663333 |
| Tnfrsf22      | chr7:150822629-150835543  | 3.552306667 | 1.626109333 |
| Ap1f          | chr6:87578422-87622162    | 3.550396667 | 1.447656667 |
| Mgmt          | chr7:144086293-144319871  | 3.550266667 | 0           |
| Gm16897       | chr1:196781952-196803153  | 3.549183333 | 2.322626667 |
| Car13         | chr3:14641726-14663002    | 3.548576667 | 10.53185    |
| Rassf5        | chr1:133072986-133141755  | 3.54849     | 5.37883     |
| Lysmd4        | chr7:74367429-74373354    | 3.542323333 | 4.391393333 |
| Mblac1        | chr5:138635541-138636849  | 3.538410667 | 2.797510333 |

|               |                           |             |             |
|---------------|---------------------------|-------------|-------------|
| Ttf2          | chr3:100742782-100773586  | 3.538145667 | 3.281403333 |
| Cbx2          | chr11:118884342-118892584 | 3.537876667 | 15.67153333 |
| St3gal2       | chr8:113443764-113496397  | 3.536916667 | 14.13563333 |
| Gm8801        | chr17:36084098-36090262   | 3.53619     | 4.91307     |
| Crebl2        | chr6:134780216-134807901  | 3.53604     | 0.872199833 |
| Vopp1         | chr6:57702257-57775119    | 3.534946667 | 11.05891333 |
| Arhgef4       | chr1:34858566-34869599    | 3.534806667 | 8.899006667 |
| Grik5         | chr7:25794869-25857388    | 3.534386667 | 6.89391     |
| Zxdb          | chrX:91969907-91975530    | 3.533123333 | 2.203373333 |
| Rcl1          | chr19:29175864-29218333   | 3.531473333 | 0.912864    |
| Pik3r2        | chr8:73292079-73300611    | 3.530686667 | 8.83005     |
| Cxcl1         | chr5:91320270-91322141    | 3.529206667 | 16.02441    |
| D17H6S53E     | chr17:35263346-35265800   | 3.52898     | 1.844578    |
| Cdk17         | chr10:92623620-92704087   | 3.526933333 | 10.15858667 |
| Fam126a       | chr5:23466753-23536501    | 3.52523     | 4.67607     |
| Acer3         | chr7:105362169-105458037  | 3.524243333 | 3.34392     |
| Eme2          | chr17:25029096-25032032   | 3.522903333 | 4.866896333 |
| Prdx4         | chrX:151758462-151772997  | 3.522214333 | 12.70659333 |
| Def8          | chr8:125966855-125987799  | 3.521902333 | 7.0143      |
| 2810408M09Rik | chr2:165315611-165318814  | 3.52162     | 2.464786667 |
| F2            | chr2:91465476-91476571    | 3.521136667 | 0.461108    |
| Trip6         | chr5:137751126-137755469  | 3.51982     | 3.799333333 |
| Cep192        | chr18:67959760-68044824   | 3.51918     | 7.239363333 |
| Mrpl38        | chr11:115993130-116000182 | 3.51624     | 4.251023333 |
| Osbpl7        | chr11:96912133-96930218   | 3.512213333 | 12.55194667 |
| Slc6a17       | chr3:107270465-107320936  | 3.511136667 | 13.43723333 |
| Sdc2          | chr15:32850477-32964476   | 3.509666667 | 10.64095    |
| Pgp           | chr17:24607417-24608541   | 3.505846667 | 5.42633     |
| Hdac10        | chr15:88953732-88959130   | 3.504856667 | 3.488746667 |
| Manea         | chr4:26251652-26273799    | 3.50162     | 4.99894     |
| Mtap1s        | chr8:73429872-73441428    | 3.499472333 | 4.98452     |
| Pdzd7         | chr19:45101396-45120262   | 3.498303333 | 5.484173333 |
| Pcdhb20       | chr18:37663917-37667314   | 3.497482333 | 8.823196667 |
| Ggta1         | chr2:35255698-35316945    | 3.490721    | 1.060929667 |
| Tdp1          | chr12:101122724-101193426 | 3.490033667 | 3.753682667 |
| Cerk          | chr15:85969530-86016571   | 3.489826667 | 10.54826    |
| Cep152        | chr2:125388823-125450849  | 3.489776    | 3.22016     |
| Gm3383        | chr14:5671163-5681081     | 3.488836667 | 0.677992667 |
| Tpst1         | chr5:130549195-130611602  | 3.48833     | 4.039263    |
| Ttpal         | chr2:163428049-163444749  | 3.487336667 | 8.243213333 |
| Lats2         | chr14:58308498-58364960   | 3.487126667 | 1.999696667 |
| C030048B08Rik | chr5:3583977-3596547      | 3.483143333 | 6.298346667 |
| 2310061C15Rik | chr8:119412584-119445336  | 3.481365    | 7.066596667 |
| Atad2         | chr15:57925601-57966637   | 3.478333333 | 2.795202333 |
| Slc30a4       | chr2:122506974-122528399  | 3.469906667 | 8.906296667 |
| Hs6st2        | chrX:48740388-49034779    | 3.469646667 | 0.0095341   |
| Ptges         | chr2:30744990-30758817    | 3.469053333 | 6.39502     |
| A930017M01Rik | chr15:44712939-44716289   | 3.467915333 | 0.0107124   |
| lfit2         | chr19:34625183-34651024   | 3.463598633 | 0.260886667 |
| Gm6249        | chr7:143859637-143902287  | 3.461653333 | 0           |
| Nrg4          | chr9:55068028-55131432    | 3.461456667 | 1.141669667 |
| Akap17b       | chrX:34148177-34185409    | 3.46094     | 9.83033     |

|               |                           |             |             |
|---------------|---------------------------|-------------|-------------|
| Cyba          | chr8:124948670-124956840  | 3.460848667 | 22.7748     |
| Zfp69         | chr4:120602741-120624306  | 3.459586667 | 0.602303467 |
| Tspan32       | chr7:150190950-150205390  | 3.459386667 | 1.203676667 |
| Zfp661        | chr2:127401268-127410413  | 3.459142    | 4.690743333 |
| A630020A06    | chr15:3946038-3965858     | 3.458433333 | 0           |
| Slc39a3       | chr10:80491284-80496657   | 3.457143667 | 3.197405333 |
| E130307A14Rik | chr10:39341216-39451813   | 3.45522     | 6.104656667 |
| Dus1l         | chr11:120650515-120657709 | 3.454661    | 10.36871333 |
| Lace1         | chr10:42032390-42198371   | 3.453049333 | 1.459073333 |
| Birc5         | chr11:117710550-117717057 | 3.452315    | 0.938037333 |
| Tnfaip8l1     | chr17:56301913-56313378   | 3.451639    | 12.84796    |
| Ephx3         | chr17:32320714-32326408   | 3.45065     | 13.90988333 |
| Abhd1         | chr5:31252438-31257468    | 3.447400569 | 5.565970082 |
| Snx21         | chr2:164611520-164618270  | 3.446119667 | 10.93088233 |
| Dbp           | chr7:52960616-52965573    | 3.445536667 | 3.609224333 |
| Olf996        | chr2:85419371-85420439    | 3.44251     | 0.039214667 |
| Zfp763        | chr17:33153808-33170326   | 3.44183     | 10.75061567 |
| D14Ertd668e   | chr14:59966243-59984327   | 3.441026667 | 2.976238667 |
| 1700008J07Rik | chr7:134653951-134656383  | 3.440373333 | 2.747433333 |
| Sfrp5         | chr19:42272460-42276742   | 3.440045333 | 0.258768667 |
| Gm14420       | chr2:177249446-177263899  | 3.438796667 | 1.179024667 |
| Actr5         | chr2:158450648-158464947  | 3.437326667 | 0.346123    |
| Hsd11b1       | chr1:195047834-195090239  | 3.435913333 | 7.726376667 |
| Prkch         | chr12:74686027-74879171   | 3.434903333 | 8.891996667 |
| Fgfr1         | chr5:109123247-109135969  | 3.433733333 | 16.74276667 |
| Tcf7          | chr11:52066105-52095752   | 3.430193333 | 11.27079333 |
| Stat5b        | chr11:100642044-100711899 | 3.429066667 | 3.35036     |
| Thap1         | chr8:27268640-27274623    | 3.424946667 | 4.94854     |
| Dnajc12       | chr10:62845190-62871588   | 3.423333333 | 11.70299667 |
| Zfp595        | chr13:67413933-67433496   | 3.423226667 | 0.4613834   |
| 2610020H08Rik | chr7:126937643-126992455  | 3.422206667 | 3.023444    |
| Kdelc1        | chr1:44163390-44175618    | 3.42113     | 7.0695      |
| Manba         | chr3:135148574-135234367  | 3.420836667 | 6.10542     |
| Creb3l4       | chr3:90041421-90047434    | 3.420463    | 3.790663333 |
| Fan1          | chr7:71491643-71518981    | 3.420356667 | 2.143369    |
| Foxred1       | chr9:35011805-35018510    | 3.418699333 | 7.13988     |
| Sat2          | chr11:69435610-69437371   | 3.418636333 | 6.75988     |
| Rgs19         | chr2:181423127-181428629  | 3.416623333 | 11.30210133 |
| Gm10516       | chr1:193960779-193974907  | 3.41593     | 1.496843667 |
| Ccdc138       | chr10:57960684-58038992   | 3.413435    | 3.73634     |
| Rfxank        | chr8:72654704-72663096    | 3.410586667 | 5.947076667 |
| Zfp11         | chr5:130160469-130175963  | 3.40379     | 1.814999333 |
| Gm5176        | chr10:110937843-110938401 | 3.399884    | 0.664602667 |
| B3gntl1       | chr11:121477521-121534465 | 3.399043333 | 6.577056667 |
| Sirt5         | chr13:43466084-43490572   | 3.395242667 | 7.949203333 |
| 2610019F03Rik | chr8:13952007-13974777    | 3.394925667 | 4.933320333 |
| Ttc30a1       | chr2:75817162-75820024    | 3.393793333 | 5.296396667 |
| Ncrna00085    | chr17:17967938-17976035   | 3.39299     | 1.996113333 |
| Zfp367        | chr13:64234364-64254507   | 3.392323333 | 1.593514667 |
| Ubiad1        | chr4:147808605-147818860  | 3.392001    | 8.566       |
| Chid1         | chr7:148679034-148725756  | 3.391031333 | 5.060923333 |
| Cftr          | chr6:18120686-18272769    | 3.389696667 | 2.327036667 |

|               |                                 |             |             |
|---------------|---------------------------------|-------------|-------------|
| Car12         | chr9:66561492-66614652          | 3.389219667 | 13.40164    |
| Arhgef3       | chr14:28051224-28217090         | 3.38695     | 3.5029      |
| Mreg          | chr1:72205806-72258881          | 3.385336667 | 5.735262333 |
| Ctu2          | chr8:125000042-125006992        | 3.38435     | 2.057514333 |
| Sv2c          | chr13:96729397-96902532         | 3.382056667 | 3.037216667 |
| Tubb3         | chr8:125935463-125945910        | 3.381838333 | 13.5528     |
| Plin3         | chr17:56418384-56429934         | 3.379984667 | 4.000603333 |
| Fgd3          | chr13:49358478-49404577         | 3.377706667 | 1.259639333 |
|               | 8-Mar chr10:126493105-126497240 | 3.376543333 | 2.523273333 |
| Zfp160        | chr17:21145904-21165820         | 3.375823333 | 8.081076667 |
| Pnp2          | chr14:51575815-51584424         | 3.375531333 | 4.686667    |
| Bahd1         | chr2:118727350-118750260        | 3.374833333 | 5.739326667 |
| Nle1          | chr11:82714269-82721897         | 3.373253333 | 0.547871    |
| Pelo          | chr13:115878562-115880366       | 3.370782    | 7.905943333 |
| Lce3a         | chr3:92729208-92730152          | 3.366092333 | 12.72884    |
| Trub1         | chr19:57527395-57565495         | 3.36543     | 2.91904     |
| Pdp1          | chr4:11885331-11893597          | 3.35727     | 4.33595     |
| Mfap4         | chr11:61298945-61302206         | 3.357003    | 3.87561     |
| Mboat7        | chr7:3629390-3645127            | 3.354646667 | 5.69725     |
| Mical2        | chr7:119369349-119498708        | 3.35431     | 17.63406667 |
| Herc6         | chr6:57530985-57615130          | 3.354016667 | 0.684334    |
| Wdr34         | chr2:29887077-29904399          | 3.35182     | 19.64453667 |
| 2210408F21Rik | chr6:31170350-31287394          | 3.34904     | 6.13415     |
| Zfp959        | chr17:56031515-56038353         | 3.347913333 | 1.4463932   |
| Heph11        | chr9:14856284-14916552          | 3.34662     | 0.038915333 |
| Urb2          | chr8:126547372-126572404        | 3.34576     | 6.70368     |
| 2010305A19Rik | chr4:108000756-108013323        | 3.340479667 | 0.807257233 |
| Gm88          | chr17:46391113-46394265         | 3.339744767 | 0.919031333 |
| Wdr5b         | chr16:36041275-36043060         | 3.339365333 | 2.104960667 |
| Zfp623        | chr15:75771381-75779830         | 3.3386      | 3.990336667 |
| 1810049H13Rik | chr11:120317917-120319377       | 3.338153333 | 3.305381667 |
| Adm           | chr7:117771182-117773333        | 3.336016667 | 6.1284      |
| Gm4724        | chr2:175147334-175163713        | 3.335143333 | 1.341873667 |
| Adck4         | chr7:28018031-28042968          | 3.332972667 | 10.08871667 |
| G2e3          | chr12:52449216-52477973         | 3.33297     | 5.849863333 |
| Harbi1        | chr2:91551106-91561723          | 3.332356667 | 10.54267667 |
| 3110001I22Rik | chr16:13672112-13678478         | 3.331267    | 7.080683333 |
| Phgdh         | chr3:98117093-98143892          | 3.3283      | 3.060496667 |
| Sema3c        | chr5:17080633-17236085          | 3.326233333 | 4.710572333 |
| Ebf1          | chr11:44431635-44818674         | 3.325656667 | 0.750361667 |
| Tmco6         | chr18:36894723-36902045         | 3.324403333 | 2.798823333 |
| Nthl1         | chr17:24769626-24775783         | 3.323503333 | 2.294864667 |
| Entpd3        | chr9:120448935-120477443        | 3.322766667 | 7.818429333 |
| Sgsh          | chr11:119204802-119216824       | 3.322723333 | 4.071476667 |
| Slc39a14      | chr14:70703273-70751231         | 3.321935667 | 3.32598     |
| Nudt18        | chr14:70977653-70982378         | 3.321934333 | 2.191054    |
| AW112010      | chr19:11122101-11125056         | 3.321463333 | 3.193303333 |
| 2810422O20Rik | chr1:165925075-165927374        | 3.320943333 | 7.731125    |
| Tmem149       | chr7:31350445-31352981          | 3.319763333 | 7.08055     |
| Cacna1a       | chr8:86939262-87164148          | 3.31973     | 7.713076667 |
| Cebpa         | chr7:35904311-35906951          | 3.317879667 | 2.155879833 |
| Ncapd2        | chr6:125118024-125141604        | 3.317686667 | 3.52696     |

|               |                           |             |             |
|---------------|---------------------------|-------------|-------------|
| Gm8994        | chr6:136277556-136280001  | 3.316699333 | 4.567476667 |
| Zfp157        | chr5:138882703-138901922  | 3.312866667 | 5.119836667 |
| Neurl3        | chr1:36321446-36330270    | 3.311266667 | 6.462273333 |
| Erbp2         | chr11:98273797-98299030   | 3.31102     | 11.67401333 |
| Lysmd2        | chr9:75473538-75485580    | 3.309474333 | 8.09363     |
| Pldn          | chr2:122564240-122575223  | 3.30889     | 5.136536667 |
| Fam46c        | chr3:100275458-100293115  | 3.307333333 | 12.62363667 |
| Ccng2         | chr5:93696598-93705257    | 3.304556667 | 14.24747333 |
| Ralgs1        | chr2:32992492-33226998    | 3.304553333 | 8.936793333 |
| Wls           | chr3:159502658-159598139  | 3.302766667 | 5.274716667 |
| Gpr135        | chr12:73170604-73171978   | 3.302669333 | 0.578056667 |
| Gpsm2         | chr3:108481555-108525217  | 3.302523333 | 4.85011     |
| Asrgl1        | chr19:9186208-9210056     | 3.302175    | 9.498426667 |
| Ly75          | chr2:60131816-60221288    | 3.302146667 | 8.852803333 |
| Tbc1d10a      | chr11:4086835-4115508     | 3.301750667 | 4.802213333 |
| Sh2d5         | chr4:137806325-137816883  | 3.301011033 | 2.585106667 |
| 9530027J09Rik | chrX:45629968-45638603    | 3.295532333 | 4.33E-09    |
| Rrp12         | chr19:41937340-41970643   | 3.295306667 | 2.683506667 |
| 3830408C21Rik | chr13:107812649-107823598 | 3.29055     | 1.86448     |
| Ahi1          | chr10:20672352-20800235   | 3.289773333 | 12.97383667 |
| Armcx5        | chrX:132277230-132281865  | 3.287       | 1.405016667 |
| Gpr21         | chr2:37372145-37374801    | 3.286863333 | 5.034206667 |
| Wdr81         | chr11:75254444-75268219   | 3.284156667 | 3.540503333 |
| Gm6710        | chr2:175018480-175032418  | 3.283686667 | 0.905253    |
| Serpinb10-ps  | chr1:109425579-109445848  | 3.281297667 | 6.531173333 |
| Dolk          | chr2:30139748-30141874    | 3.280768667 | 8.48574     |
| Slc26a2       | chr18:61356507-61371250   | 3.27521     | 6.708546667 |
| Zfp758        | chr17:22498419-22514248   | 3.27304     | 3.727028333 |
| Gm8773        | chr5:5573798-5576203      | 3.272116667 | 0           |
| Ptges2        | chr2:32251409-32258260    | 3.271220333 | 3.584175333 |
| 5031434C07Rik | chr6:112236787-112240313  | 3.267770667 | 0.389163333 |
| Tap1          | chr17:34324500-34334170   | 3.26406     | 0.922537    |
| Mdga2         | chr12:67567045-68323536   | 3.26181     | 1.435098333 |
| Rassf8        | chr6:145756902-145766104  | 3.259474633 | 0.681890667 |
| Igsf6         | chr7:128207580-128218044  | 3.257916667 | 3.892976333 |
| Rhbdf1        | chr11:32109584-32122293   | 3.257756667 | 11.00991    |
| Gm10509       | chr17:21827178-21829180   | 3.257501667 | 0.707866    |
| Klf16         | chr10:80029865-80040041   | 3.256676667 | 3.131906667 |
| Hist1h4i      | chr13:22132684-22133221   | 3.25638     | 8.662891667 |
| Vdr           | chr15:97684857-97738727   | 3.255681333 | 0.6783614   |
| E2f8          | chr7:56121798-56136411    | 3.255320667 | 1.570121    |
| Slc35d2       | chr13:64197617-64230638   | 3.25444     | 3.05981     |
| Spata1        | chr3:146120166-146162717  | 3.252298333 | 3.726303333 |
| Acad8         | chr9:26781725-26807134    | 3.251706667 | 1.999110667 |
| Gm14477       | chrX:10876446-10876764    | 3.24952     | 0.067964667 |
| C230091D08Rik | chr7:66563293-66579519    | 3.248053333 | 4.835063333 |
| Ankrd35       | chr3:96474053-96494957    | 3.247846667 | 6.101163333 |
| Pter          | chr2:12845667-12925080    | 3.246779    | 0.453287633 |
| Tmem81        | chr1:134402806-134405216  | 3.245498667 | 2.683494333 |
| Mtss1l        | chr8:113245383-113265300  | 3.241783333 | 15.6087     |
| 2610204G22Rik | chr4:155135300-155137669  | 3.240983333 | 1.017283333 |
| Mpst          | chr15:78237141-78244445   | 3.239573333 | 3.423076667 |



|               |                           |             |             |
|---------------|---------------------------|-------------|-------------|
| Srgap3        | chr6:112667965-112897260  | 3.238963333 | 3.911936    |
| Tmc8          | chr11:117643610-117654451 | 3.238103667 | 1.962875    |
| Etv1          | chr12:39506844-39594802   | 3.236246667 | 186.982     |
| Oas2          | chr5:121180341-121199857  | 3.23554     | 1.551648    |
| Hist1h3i      | chr13:21874783-21875266   | 3.232166667 | 3.462591667 |
| Trnp1         | chr4:133047014-133054465  | 3.23193     | 8.342956667 |
| Commd9        | chr2:101726418-101741796  | 3.230636667 | 5.010158333 |
| Gm6710        | chr2:175868376-175882314  | 3.230506667 | 0.910122    |
| Mrpl45        | chr11:97177029-97191234   | 3.228931    | 1.471833    |
| Plk4          | chr3:40603872-40620805    | 3.22815     | 3.591476667 |
| Sema5b        | chr16:35541447-35664344   | 3.22769     | 0           |
| Cbln3         | chr14:56497756-56503093   | 3.22673     | 0.0454657   |
| Tmem101       | chr11:102013860-102017721 | 3.2266      | 12.03682    |
| 1700019G17Rik | chr6:85849043-85854932    | 3.22645     | 2.430443333 |
| F930015N05Rik | chr11:64246636-64250176   | 3.223993333 | 1.172906333 |
| Tmem95        | chr11:69690185-69691520   | 3.221778333 | 2.075573333 |
| Cd4           | chr6:124814710-124838227  | 3.221440967 | 8.284753333 |
| Trim46        | chr3:89038098-89049819    | 3.220810333 | 2.001097    |
| Tbc1d12       | chr19:38911068-38994413   | 3.21853     | 2.618313333 |
| Dusp6         | chr10:98725864-98730123   | 3.217923333 | 16.33673333 |
| Shisa4        | chr1:137268032-137271640  | 3.21693     | 0.137325    |
| Zfp213        | chr17:23693733-23701193   | 3.210326667 | 1.445160333 |
| 1700113I22Rik | chr11:101280127-101286647 | 3.20859     | 8.075566667 |
| Samd12        | chr15:53293355-53733991   | 3.204498667 | 9.88862     |
| Anapc10       | chr8:82235718-82301220    | 3.202423333 | 8.304236667 |
| Hist1h4n      | chr13:21923715-21924027   | 3.201193333 | 4.856923333 |
| Azi1          | chr11:119925743-119948141 | 3.200788333 | 2.68627     |
| Anxa3         | chr5:97222403-97274987    | 3.20016     | 14.60662333 |
| Pet112l       | chr3:85378050-85458392    | 3.199833333 | 3.55162     |
| Tns1          | chr1:73956804-74171021    | 3.195483333 | 2.351106333 |
| Trim14        | chr4:46519718-46549016    | 3.19542     | 9.747666667 |
| Gm11961       | chr11:4520277-4530014     | 3.19512     | 1.234876667 |
| 2410066E13Rik | chr6:54631765-54650400    | 3.19389     | 2.956253333 |
| Cybas3        | chr19:10652212-10664320   | 3.19359     | 10.0325     |
| Tmem125       | chr4:118213545-118216331  | 3.19096     | 5.129213333 |
| Vars2         | chr17:35792579-35804537   | 3.18503     | 4.186207333 |
| Adck5         | chr15:76406788-76426241   | 3.182692667 | 8.8442      |
| B930059L03Rik | chr12:111829583-111830889 | 3.182575333 | 0           |
| lfitm7        | chr16:13982891-13984714   | 3.181279667 | 7.933555667 |
| Lin7b         | chr7:52623260-52625934    | 3.18067     | 1.064281333 |
| Hist1h2ab     | chr13:23842956-23843462   | 3.1788      | 1.737173333 |
| Pmf1          | chr3:88198064-88214238    | 3.177663333 | 2.80257     |
| Ubac2         | chr14:122277827-122420257 | 3.17751     | 12.392      |
| Sec1          | chr7:52933056-52934928    | 3.17672     | 0.903256    |
| Zfp948        | chr17:21704009-21725649   | 3.176466667 | 8.015623333 |
| Erc2          | chr7:19967387-19981041    | 3.174073333 | 4.611603333 |
| Ufsp1         | chr5:137735896-137736892  | 3.173155333 | 8.002076667 |
| Rasgef1b      | chr5:99646438-99681946    | 3.172916667 | 3.685263333 |
| Xkr4          | chr1:3204562-3661579      | 3.172163333 | 1.864073333 |
| Ntf5          | chr7:52669064-52672549    | 3.170653333 | 0.048061    |
| Atp10d        | chr5:72594567-72690010    | 3.16984     | 6.050826667 |
| Asb6          | chr2:30678617-30683820    | 3.166136667 | 5.17064     |

|               |                               |             |             |
|---------------|-------------------------------|-------------|-------------|
| Zfp27         | chr7:30678355-30691123        | 3.165903333 | 2.111729333 |
| Galnt4        | chr10:98570768-98575881       | 3.164703333 | 7.011465667 |
| Ube2c         | chr2:164595428-164598402      | 3.1622255   | 8.285866667 |
| Lrrc24        | chr15:76545705-76552603       | 3.162187333 | 1.416696    |
| Naa11         | chr5:97811227-97821349        | 3.162163667 | 0.341447233 |
| Bpifc         | chr10:85422435-85474605       | 3.160302333 | 6.033875333 |
| Yif1a         | chr19:5088537-5092879         | 3.159246667 | 6.46643     |
| Rin3          | chr12:103521283-103629064     | 3.158113333 | 2.681819    |
| Gmnn          | chr13:24843713-24853806       | 3.157846667 | 3.93453     |
| Zfp395        | chr14:65977512-66017767       | 3.156003333 | 9.794596667 |
| Tusc1         | chr4:93000838-93002202        | 3.155363333 | 1.340353333 |
|               | 9-Sep chr10:58604374-58684595 | 3.15525     | 8.799336667 |
| Cdan1         | chr2:120541889-120557253      | 3.154803333 | 2.148978667 |
| Tmem168       | chr6:13530688-13558063        | 3.15384     | 2.407769    |
| Tcp10a        | chr17:7529008-7550209         | 3.151883333 | 0.811186333 |
| Gm13251       | chr4:145728598-145749009      | 3.151866667 | 1.683914    |
| Tpcn2         | chr7:152439827-152469832      | 3.149943333 | 1.506866667 |
| Gm5424        | chr10:61533769-61535319       | 3.147783333 | 7.13592     |
| Nfkb2         | chr19:46379226-46386580       | 3.147656667 | 2.887276667 |
| Mogs          | chr6:83065499-83068892        | 3.1462      | 7.735826667 |
| Tgfbr2        | chr9:115996812-116084481      | 3.145735333 | 2.901146667 |
| Coil          | chr11:88835248-88852927       | 3.144538333 | 2.457199667 |
| Amd2          | chr10:40007270-40021992       | 3.139769238 | 6.4441111   |
| Gpr160        | chr3:30754871-30796114        | 3.138863333 | 2.104949333 |
| Txnrd2        | chr16:18426509-18479166       | 3.136696667 | 2.195677333 |
| Sema3e        | chr5:14025275-14256689        | 3.134573333 | 5.619906667 |
| Map3k6        | chr4:132796732-132808843      | 3.132743333 | 3.986203333 |
| Engase        | chr11:118338273-118350512     | 3.12841     | 1.515536667 |
| Zfp526        | chr7:26006469-26012524        | 3.126663333 | 2.040493333 |
| Trp73         | chr4:153430357-153514317      | 3.125443333 | 0.628596067 |
| Lrig1         | chr6:94554522-94650139        | 3.12342     | 6.645016667 |
| Kprp          | chr3:92626995-92631169        | 3.122513    | 0.158344    |
| Gm3264        | chr14:4534030-4622491         | 3.12207     | 0.982733333 |
| Catsper4      | chr4:133767882-133783298      | 3.120866667 | 2.288403333 |
| Stat5a        | chr11:100720664-100746483     | 3.120486667 | 2.140116    |
| Blvrb         | chr7:28232996-28251000        | 3.119453333 | 5.569043667 |
| D2Wsu81e      | chr2:30028966-30033979        | 3.11926     | 4.83445     |
| Fsd1l         | chr4:53644342-53719881        | 3.118776667 | 3.607916667 |
| Sp100         | chr1:87546624-87606023        | 3.11628     | 0.902053333 |
| Gm14483       | chrX:10885885-10886386        | 3.114520931 | 0.189529867 |
| B3gat2        | chr1:23768764-23854697        | 3.111361    | 4.91776     |
| Orm3          | chr4:63017195-63020545        | 3.109180333 | 0.179322667 |
| Igf2bp3       | chr6:49035216-49164953        | 3.105211667 | 3.62407     |
| Rgs6          | chr12:83718024-84259799       | 3.103498667 | 4.480806667 |
| Fbxl6         | chr15:76366157-76369176       | 3.101888667 | 8.71323     |
| Bace2         | chr16:97578334-97660619       | 3.101671    | 6.840926667 |
| E230016M11Rik | chr6:66986592-67030646        | 3.100848    | 1.074666667 |
| Nol12         | chr15:78765362-78772340       | 3.100279    | 3.921773333 |
| Cnga4         | chr7:112553081-112557252      | 3.09994     | 0.437216667 |
| Jag1          | chr2:136907186-136942256      | 3.097253333 | 10.02698333 |
| Cntfr         | chr4:41604528-41644123        | 3.096266667 | 0           |
| Npff          | chr15:102354269-102355373     | 3.095486667 | 12.78934333 |

|               |                           |             |             |
|---------------|---------------------------|-------------|-------------|
| Carns1        | chr19:4164323-4175479     | 3.094448333 | 9.328576667 |
| Clpb          | chr7:108812281-108938682  | 3.094016667 | 3.723706667 |
| Dcaf4         | chr12:84861415-84882942   | 3.093996667 | 5.570603333 |
| Zfp772        | chr7:7154832-7162709      | 3.093753333 | 5.58242     |
| Depdc7        | chr2:104561943-104582958  | 3.089209333 | 7.180036667 |
| Cdk6          | chr5:3344311-3522225      | 3.086039667 | 12.97692667 |
| Pmaip1        | chr18:66618257-66625212   | 3.08526     | 4.539673333 |
| Fcer1g        | chr1:173159702-173164480  | 3.082546667 | 3.232296667 |
| Acap3         | chr4:155265983-155281360  | 3.08029     | 13.9817     |
| Cenpo         | chr12:4211671-4234294     | 3.078521333 | 7.232476667 |
| Gtf3c4        | chr2:28677819-28695880    | 3.076246667 | 2.504566667 |
| 2610203C22Rik | chr1:9550913-9621173      | 3.076073333 | 3.091624667 |
| Rbms3         | chr9:116481863-117539031  | 3.075193333 | 6.654086667 |
| Arrdc4        | chr7:75881879-75894124    | 3.075043333 | 10.00164    |
| Atpaf1        | chr4:115457418-115484919  | 3.073816667 | 3.286157667 |
| Entpd1        | chr19:40734283-40816092   | 3.072953333 | 2.361843333 |
| Dhx34         | chr7:16782569-16807381    | 3.07249     | 3.874076667 |
| Cdkl3         | chr11:51817722-51898169   | 3.07166     | 5.122366667 |
| Zdhhc12       | chr2:29946463-29949155    | 3.0713      | 7.032256667 |
| Zfp518b       | chr5:39059722-39076065    | 3.070399333 | 7.123433333 |
| Kcnj6         | chr16:94970289-95219303   | 3.070073333 | 0.457729667 |
| Prickle1      | chr15:93329544-93426322   | 3.067853333 | 2.505416667 |
| Phf21b        | chr15:84615805-84686559   | 3.066186667 | 1.625337333 |
| AW011738      | chr4:155577392-155580137  | 3.065709667 | 2.531317567 |
| Klhl26        | chr8:72974126-73000842    | 3.064953333 | 3.628763333 |
| Amigo3        | chr9:107955489-107958032  | 3.064889    | 2.922228    |
| Gpat2         | chr2:127250934-127261828  | 3.064493333 | 0.226354333 |
| Amph          | chr13:19040239-19242784   | 3.063796667 | 4.478266667 |
| Ttll12        | chr15:83405523-83425587   | 3.058696667 | 10.92591333 |
| Efhb          | chr17:53538213-53602646   | 3.058193333 | 1.585750333 |
| Ttc24         | chr3:87873331-87882226    | 3.057722    | 0           |
| Man1c1        | chr4:134117604-134260205  | 3.057636667 | 3.2359      |
| Invs          | chr4:48292673-48444825    | 3.05735     | 9.710363333 |
| Nxt1          | chr2:148498350-148501762  | 3.05652     | 8.77499     |
| Setdb2        | chr14:60020847-60059714   | 3.05521     | 6.457106667 |
| Hspa1l        | chr17:35109647-35116173   | 3.05422     | 3.37867     |
| Gm6623        | chr17:36315721-36318309   | 3.05331     | 1.835756667 |
| 4930405P13Rik | chr11:88767241-88797375   | 3.052353333 | 0.046744667 |
| Pmp22         | chr11:62945011-62973048   | 3.050343    | 3.375836667 |
| Zbtb49        | chr5:38591282-38611667    | 3.050073333 | 1.971538333 |
| Snx29         | chr16:11322996-11755566   | 3.04804     | 2.260774    |
| Tk1           | chr11:117676832-117687328 | 3.047813333 | 1.550163333 |
| Gcnt3         | chr9:69879302-69885895    | 3.047586667 | 3.029183333 |
| Selenbp2      | chr3:94497494-94508328    | 3.047558    | 12.67886667 |
| Snx11         | chr11:96628862-96638869   | 3.043336667 | 5.558083333 |
| Slc5a9        | chr4:111547981-111575401  | 3.040924333 | 1.157812    |
| Abhd15        | chr11:77328618-77334130   | 3.04079     | 4.31442     |
| Tnf           | chr17:35336335-35338941   | 3.03809     | 7.366066667 |
| Ppcs          | chr4:119091137-119095025  | 3.036462333 | 4.551983333 |
| Alkbh4        | chr5:136614650-136617484  | 3.033673333 | 0.355211667 |
| Wnt9a         | chr11:59120431-59147054   | 3.03356     | 1.999363    |
| Rilpl2        | chr5:124913273-124928244  | 3.033509667 | 2.25582     |

|               |                           |             |             |
|---------------|---------------------------|-------------|-------------|
| Slit3         | chr11:34934957-35522009   | 3.032477667 | 0.564017333 |
| 4933432I03Rik | chr14:103386628-103433020 | 3.031831667 | 0           |
| Il1rl2        | chr1:40381471-40422316    | 3.03122     | 8.479303333 |
| Rpp14         | chr14:8912826-8924360     | 3.030906667 | 9.657543333 |
| Glb1          | chr9:114310236-114383495  | 3.028614    | 9.521176667 |
| Phlpp2        | chr8:112392502-112468571  | 3.028110667 | 3.22236     |
| Rttm          | chr18:89141181-89300406   | 3.028026667 | 4.80897     |
| Akap7         | chr10:24888895-25018969   | 3.02625     | 6.409923333 |
| Cntrob        | chr11:69112997-69137375   | 3.026246667 | 6.557056667 |
| Bcl2l12       | chr7:52246591-52252949    | 3.025266667 | 4.77448     |
| Unc93b1       | chr19:3935185-3949340     | 3.024906667 | 5.642543333 |
| Pmel          | chr10:128143313-128157294 | 3.023427667 | 0.321070667 |
| Hace1         | chr10:45297634-45432151   | 3.022673333 | 10.50531333 |
| Cdkn3         | chr14:47380215-47391200   | 3.021353667 | 0.099803333 |
| 9130019O22Rik | chr7:134525773-134530680  | 3.019156667 | 1.743964    |
| Zfp599        | chr9:22051873-22064339    | 3.018244333 | 2.82964     |
| Ubac1         | chr2:25852477-25877280    | 3.016456667 | 5.44001     |
| Trmt11        | chr10:30254030-30320555   | 3.016118    | 7.64395     |
| Stra6         | chr9:57976894-58001804    | 3.016011367 | 5.302003333 |
| Syt14         | chr1:194723500-194861892  | 3.014303333 | 3.813676667 |
| Zfp94         | chr7:25086722-25101685    | 3.013442    | 0.683133333 |
| Coro2a        | chr4:46549808-46614801    | 3.013335333 | 3.273958667 |
| Micalcl       | chr7:119511821-119556618  | 3.009741667 | 26.3852     |
| Plekho1       | chr3:95792762-95799762    | 3.00894     | 27.36441667 |
| Il17rc        | chr6:113421448-113433157  | 3.007906667 | 5.63333     |
| Gm14484       | chrX:10889059-10889553    | 3.00702     | 0.068633267 |
| Serpinb11     | chr1:109258890-109277052  | 3.00672     | 8.697906667 |
| Ccr9          | chr9:123676328-123692575  | 3.006349667 | 0.745506667 |
| Zfp945        | chr17:22983663-23004101   | 3.006193333 | 3.286926667 |
| AI450353      | chr11:83106931-83108431   | 3.00585     | 2.606126667 |
| Ercc4         | chr16:13109828-13152102   | 3.00397     | 5.241883333 |
| Apoo          | chrX:91612448-91662431    | 3.00235     | 4.52991     |
| 9430008C03Rik | chr2:158179435-158187258  | 3.000476667 | 4.273736333 |
| Trp53i13      | chr11:77321600-77326775   | 3.00022     | 2.248676667 |
| Tmem177       | chr1:121804477-121809745  | 2.998130333 | 0.503257767 |
| Sergef        | chr7:53698528-53895177    | 2.997776333 | 0.969754333 |
| Palld         | chr8:63993819-64381487    | 2.997472667 | 6.30463     |
| Muc4          | chr16:32735971-32782476   | 2.994807667 | 24.1291047  |
| Gm11202       | chr11:79420580-79436665   | 2.994279333 | 0.421195567 |
| Plekhg1       | chr10:6379238-6606164     | 2.993513333 | 2.488213333 |
| Tmem121       | chr12:114424113-114427733 | 2.992628667 | 0.795555333 |
| 2610002I17Rik | chr9:110207695-110224606  | 2.992188333 | 0.44162     |
| Abat          | chr16:8513521-8621660     | 2.991724667 | 1.123239967 |
| Polrmt        | chr10:79198869-79209326   | 2.990063333 | 2.310266667 |
| Enpp3         | chr10:24493619-24556001   | 2.98786     | 7.020916667 |
| Fam166b       | chr4:43439891-43442006    | 2.984756333 | 2.499118    |
| Hps6          | chr19:46077967-46080663   | 2.983743333 | 1.8039685   |
| Nphp3         | chr9:103904873-103946141  | 2.983033333 | 3.803223333 |
| Pard6g        | chr18:80243633-80316379   | 2.98055     | 13.38774667 |
| Reep4         | chr14:70945057-70948742   | 2.97835     | 15.4379     |
| Sars2         | chr7:29526986-29538898    | 2.976998667 | 5.984198    |
| Mef2b         | chr8:72676676-72691387    | 2.9764      | 4.448029    |

|               |                           |             |             |
|---------------|---------------------------|-------------|-------------|
| Ubxn10        | chr4:138274440-138281166  | 2.97454     | 4.91807     |
| Dhrs11        | chr11:84634229-84642505   | 2.971503333 | 2.10317     |
| Itpa          | chr2:130493576-130507350  | 2.970883333 | 12.81298333 |
| Ly6k          | chr15:74627303-74630398   | 2.968053333 | 3.320433333 |
| Lyz1          | chr10:116724850-116729924 | 2.96773     | 3.362186567 |
| Arg1          | chr10:24635012-24647276   | 2.9676      | 11.51521133 |
| Nnt           | chr13:120123123-120197945 | 2.967426667 | 5.899803333 |
| Cnksr3        | chr10:3134303-3227479     | 2.965565333 | 1.186931    |
| Acpp          | chr9:104190569-104240052  | 2.96514     | 4.25914     |
| Tfap2c        | chr2:172375092-172384121  | 2.96391     | 5.849603333 |
| 4930562C15Rik | chr16:4835415-4867691     | 2.963076667 | 2.580646667 |
| Itgb3bp       | chr4:99432092-99495809    | 2.962255667 | 1.54376     |
| Aasdh         | chr5:77304959-77334539    | 2.961966    | 2.7893      |
| Dhx58         | chr11:100556197-100565585 | 2.96182     | 0.517009333 |
| Ereg          | chr5:91503642-91522675    | 2.960530333 | 0.503849333 |
| Acot6         | chr12:85441603-85450733   | 2.960043333 | 0.970381967 |
| Tmem194       | chr10:127114120-127138103 | 2.957663333 | 3.791206667 |
| Nr6a1         | chr2:38578893-38781981    | 2.956736667 | 4.705223333 |
| Rfc4          | chr16:23114020-23127803   | 2.955953333 | 8.12744     |
| Naf1          | chr8:69384115-69414463    | 2.954976667 | 1.948113333 |
| Bcl3          | chr7:20393810-20408104    | 2.951793333 | 1.771697667 |
| Specc1        | chr11:61890598-62036515   | 2.9504      | 5.05284     |
| H6pd          | chr4:149353589-149383132  | 2.949323333 | 6.055226667 |
| Fam35a        | chr14:35050220-35123689   | 2.948836667 | 2.148095667 |
| BC057079      | chr4:87740533-88056915    | 2.9482      | 7.08795     |
| Slc15a5       | chr6:137932110-138028437  | 2.947053333 | 1.862790667 |
| Clstn2        | chr9:97344813-97933586    | 2.946263333 | 6.338916667 |
| Zbtb17        | chr4:141000587-141023852  | 2.945896667 | 5.609863333 |
| A830018L16Rik | chr1:11404185-11965983    | 2.945413333 | 0.633472333 |
| Enpp1         | chr10:24361216-24431908   | 2.94156     | 2.548691667 |
| Fam196a       | chr7:142073590-142130113  | 2.93865     | 1.119336    |
| Sertad3       | chr7:28258858-28262383    | 2.937220667 | 3.763956333 |
| Mcph1         | chr8:18595172-18803188    | 2.933093333 | 4.24798     |
| Nup54         | chr5:92844565-92864225    | 2.93294     | 4.563773333 |
| Prss32        | chr17:23990738-23996743   | 2.932213333 | 12.46995667 |
| Procr         | chr2:155576952-155581214  | 2.930679667 | 2.179157    |
| Med26         | chr8:75018457-75072209    | 2.929796667 | 1.262596333 |
| Gm10560       | chr4:155395753-155397933  | 2.929511667 | 0.74425     |
| Tirap         | chr9:34991975-35007876    | 2.928706667 | 9.724423333 |
| Gsto2         | chr19:47940034-47960795   | 2.927126667 | 1.94822     |
| Tgfb1         | chr7:26472020-26490015    | 2.925140333 | 1.893956667 |
| Bmf           | chr2:118354492-118375414  | 2.92494     | 10.93836267 |
| Plekhh2       | chr17:84911234-85021482   | 2.92437     | 8.739896667 |
| Kif20b        | chr19:34996847-35050221   | 2.923506667 | 1.770743333 |
| Lrrtm2        | chr18:35368662-35374678   | 2.92344     | 4.55344     |
| Csgalnact1    | chr8:70880679-71259045    | 2.92271     | 10.90946333 |
| Fxn           | chr19:24335942-24355076   | 2.922057333 | 8.845416667 |
| Supt3h        | chr17:44914119-45256233   | 2.92031     | 18.65532667 |
| AF251705      | chr11:114858082-114863194 | 2.918477133 | 0.496905    |
| 2810408A11Rik | chr11:69710859-69714488   | 2.917821    | 3.063706667 |
| AU016765      | chr17:64863428-64904930   | 2.917353333 | 0           |
| Samd5         | chr10:9347056-9395006     | 2.917176333 | 2.996583333 |

|               |                           |             |             |
|---------------|---------------------------|-------------|-------------|
| Klhl36        | chr8:122386204-122400889  | 2.916086667 | 1.888443    |
| E130003G02Rik | chr2:25146739-25154448    | 2.915200667 | 1.7556      |
| Copz2         | chr11:96711189-96722516   | 2.9136      | 0.085869    |
| Zfp109        | chr7:25012813-25022617    | 2.913365333 | 2.60614     |
| Lmln          | chr16:33062606-33125745   | 2.912813333 | 4.268196667 |
| Afmid         | chr11:117687232-117701222 | 2.909334    | 4.640063333 |
| P2rx3         | chr2:84836708-84875991    | 2.907806667 | 1.158743333 |
| Lgals6        | chr7:29619200-29626652    | 2.907679401 | 9.71694     |
| Zfp54         | chr17:21560190-21572348   | 2.906686667 | 2.781533333 |
| Rpusd4        | chr9:35075465-35083542    | 2.903728333 | 1.477457667 |
| Cr2           | chr1:196963004-197002909  | 2.90302     | 1.309116033 |
| Rbak          | chr5:143933867-143942422  | 2.898646667 | 10.04088667 |
| Mslnl         | chr17:25872984-25885275   | 2.897926667 | 7.726416667 |
| Eid2          | chr7:29052899-29054187    | 2.897533333 | 6.5301      |
| Adck1         | chr12:89599244-89700162   | 2.897473333 | 4.073653333 |
| Gm20597       | chr10:53218248-53238795   | 2.896341    | 0.0063752   |
| F3            | chr3:121426454-121437970  | 2.896204667 | 10.14066667 |
| Casp1         | chr9:5298516-5307281      | 2.895646    | 14.45621    |
| Pram1         | chr17:33775000-33782651   | 2.894756667 | 6.920487667 |
| Taf5          | chr19:47142237-47157969   | 2.891374333 | 10.30414333 |
| Zscan12       | chr13:21454688-21464171   | 2.889656667 | 3.111628    |
| Rbks          | chr5:31926811-31999983    | 2.888454333 | 3.408603333 |
| Klk12         | chr7:51024469-51028851    | 2.887634333 | 2.876473333 |
| Rgag4         | chrX:99261880-99266646    | 2.887386    | 6.295413333 |
| 2310046K01Rik | chr2:151822246-151834994  | 2.882814667 | 22.90661333 |
| Tnfaip2       | chr12:112680871-112693229 | 2.88146     | 7.150906667 |
| Zfp580        | chr7:5003133-5005325      | 2.877709333 | 2.20343     |
| Leprel4       | chr11:100270063-100276133 | 2.876889    | 9.257603333 |
| Zfp804b       | chr5:6769029-7344378      | 2.876016667 | 0.316413333 |
| 4930547C10Rik | chr4:52609145-52625035    | 2.875510667 | 0           |
| 6230427J02Rik | chr9:107886554-107888247  | 2.875177    | 1.601441667 |
| Fgf11         | chr11:69611703-69615127   | 2.87469     | 7.295716667 |
| Sfxn5         | chr6:85163044-85283416    | 2.874390333 | 3.086239667 |
| Cib3          | chr8:74728233-74736736    | 2.873919667 | 184.0224    |
| B3gnt8        | chr7:26412642-26414509    | 2.869196667 | 6.838342    |
| Phf15         | chr11:51626957-51670983   | 2.865756    | 1.973473333 |
| Rps6kl1       | chr12:86476545-86492214   | 2.864133333 | 0.057897    |
| Rps6ka4       | chr19:6903573-6915091     | 2.864006667 | 3.257303333 |
| Defa-ps12     | chr8:19210461-19212760    | 2.86283     | 0           |
| Tctn2         | chr5:125048757-125077658  | 2.862697333 | 7.506256667 |
| Zfp619        | chr7:46773135-46795785    | 2.862411    | 3.73563     |
| Wrap53        | chr11:69375255-69392826   | 2.862052667 | 1.867652    |
| Pdss1         | chr2:22751041-22795779    | 2.858926    | 2.784432333 |
| Muc1          | chr3:89032973-89037291    | 2.858666    | 16.25895433 |
| Hist1h3f      | chr13:23635920-23636923   | 2.85685     | 1.136503333 |
| Pvrl1         | chr9:43552658-43615544    | 2.855266667 | 8.369386667 |
| Kcnh6         | chr11:105869516-105895378 | 2.85137     | 11.54214667 |
| E430018J23Rik | chr7:134534349-134537135  | 2.846631333 | 1.688255667 |
| Ankrd39       | chr1:36595017-36604046    | 2.846167    | 2.714727667 |
| Cul7          | chr17:46787286-46801313   | 2.844336667 | 4.3715      |
| Arhgap10      | chr8:79774264-80041806    | 2.844306667 | 2.263536333 |
| Akr1c13       | chr13:4190432-4204849     | 2.84343     | 2.533853267 |

|               |                           |             |             |
|---------------|---------------------------|-------------|-------------|
| Fancf         | chr7:59115948-59117637    | 2.843266667 | 0.823345    |
| Nr4a2         | chr2:56959636-56976414    | 2.840746667 | 11.17231667 |
| Gas1          | chr13:60275765-60278896   | 2.84071     | 2.19127     |
| Vmn1r43       | chr6:89819454-89820523    | 2.838923333 | 0           |
| Gpam          | chr19:55144223-55173937   | 2.838616667 | 2.976217    |
| 1700049G17Rik | chr7:28692410-28714449    | 2.83794     | 6.094283333 |
| Phlda3        | chr1:137662661-137665711  | 2.837702    | 5.991816667 |
| Rhox4a        | chrX:34805369-34810130    | 2.837573667 | 0.082501667 |
| Aqp11         | chr7:104874888-104886757  | 2.836402667 | 2.166669    |
| Dhodh         | chr8:112117147-112132573  | 2.835766667 | 2.037608    |
| Gdap1         | chr1:17135453-17154351    | 2.83309     | 6.76019     |
| Dnajc30       | chr5:135540075-135541235  | 2.828814    | 9.718233333 |
| 1500001M20Rik | chr6:114954398-114987892  | 2.827266    | 1.959676667 |
| Apba1         | chr19:23833365-24024087   | 2.826872933 | 3.867733333 |
| B230217O12Rik | chr19:57397686-57435389   | 2.825973333 | 1.502004567 |
| Cad           | chr5:31357183-31380852    | 2.824573333 | 1.880356667 |
| Slc8a1        | chr17:81772444-82137717   | 2.822858667 | 2.438390333 |
| Sdc3          | chr4:130348451-130382233  | 2.821946667 | 4.75679     |
| Lig4          | chr8:9970019-9976323      | 2.820863333 | 4.222783333 |
| Rgs14         | chr13:55471092-55486048   | 2.818363333 | 1.134615667 |
| Lrrc14b       | chr13:74497029-74501448   | 2.816196667 | 0.560523667 |
| Gm4349        | chr3:95231270-95235007    | 2.81278     | 2.26144     |
| E4f1          | chr17:24580723-24592256   | 2.81239     | 6.497656667 |
| Slc16a4       | chr3:107094209-107115033  | 2.811313333 | 2.050626667 |
| Fuk           | chr8:113406362-113426359  | 2.809733333 | 2.664613333 |
| Itgav         | chr2:83564553-83647073    | 2.80624     | 8.63618     |
| Galnt11       | chr12:81619976-81704883   | 2.799243333 | 0.164349667 |
| Abtb2         | chr2:103406466-103558580  | 2.799080333 | 2.443487667 |
| Nova2         | chr7:19511236-19550668    | 2.797473333 | 2.728283667 |
| Solh          | chr17:26096500-26102450   | 2.79566     | 4.959533333 |
| Pms2          | chr5:144670869-144692625  | 2.792470333 | 2.638853667 |
| Pusl1         | chr4:155262968-155265871  | 2.792413334 | 4.291913333 |
| Msto1         | chr3:88713537-88717872    | 2.790846333 | 9.570349333 |
| Scgb1a1       | chr19:9158131-9162446     | 2.7896      | 0           |
| 2410016O06Rik | chr12:85291557-85293903   | 2.788432667 | 6.512283333 |
| Pxmp4         | chr2:154412779-154429409  | 2.786468667 | 14.45721333 |
| Txnl4b        | chr8:112089885-112097951  | 2.786170333 | 2.053469333 |
| Gm3002        | chr14:3920623-3936392     | 2.78503     | 2.168833333 |
| Cyp27a1       | chr1:74760147-74784464    | 2.784365333 | 1.288499333 |
| Shisa9        | chr16:11984205-12270997   | 2.783836667 | 11.95753333 |
| Myo7b         | chr18:32118887-32196585   | 2.782876667 | 0.248977333 |
| 5830418P13Rik | chr9:103325907-103363590  | 2.781046667 | 0.292891333 |
| St8sia2       | chr7:81084005-81158568    | 2.778886667 | 0.054366333 |
| Stac          | chr9:111463937-111592720  | 2.777543333 | 0.029187167 |
| Ttc23         | chr7:74792295-74871462    | 2.776436667 | 2.698716667 |
| Rnf148        | chr6:23603894-23605136    | 2.774440667 | 6.685653    |
| Gm6994        | chr14:77879289-77906675   | 2.774238333 | 0           |
| Ccdc17        | chr4:116269334-116272871  | 2.772336667 | 8.962446667 |
| Nap1l2        | chrX:100379397-100382003  | 2.77145     | 3.46057     |
| Mettl2        | chr11:104987738-105002460 | 2.767686667 | 4.777976333 |
| Kif27         | chr13:58388876-58456223   | 2.767446667 | 0.738931033 |
| Homer3        | chr8:72806897-72818260    | 2.76744     | 2.908217667 |

|               |                           |             |             |
|---------------|---------------------------|-------------|-------------|
| Pkhd1         | chr1:20047859-20608138    | 2.7668      | 6.503956667 |
| Alkbh2        | chr5:114573942-114578185  | 2.765436667 | 2.7875161   |
| Sh3gl2        | chr4:84851359-85035283    | 2.765076667 | 7.2441      |
| Gpr3          | chr4:132765254-132768451  | 2.763836667 | 5.616833333 |
| Ptprn2        | chr12:117724192-118516640 | 2.76366     | 1.014815333 |
| Micall2       | chr5:140182646-140212287  | 2.763016667 | 7.600783333 |
| Gm10639       | chr9:78137734-78153332    | 2.762468    | 3.508496667 |
| Snn           | chr16:11066390-11075078   | 2.76189     | 10.20258333 |
| Glmn          | chr5:107977985-108026907  | 2.758726667 | 2.288497333 |
| 5430402013Rik | chr6:50516641-50544864    | 2.757876333 | 0.096806333 |
| Smad7         | chr18:75527018-75555588   | 2.75676     | 9.79105     |
| Immp2l        | chr12:41750676-43056573   | 2.754163333 | 6.984806667 |
| Rasip1        | chr7:52882906-52894462    | 2.751426667 | 2.24006     |
| Slc46a3       | chr5:148690016-148706378  | 2.746316667 | 2.879397    |
| Tgds          | chr14:118511132-118531987 | 2.743432667 | 6.13523     |
| Polh          | chr17:46308941-46339574   | 2.743033333 | 4.024806667 |
| Nek11         | chr9:105064796-105297617  | 2.739875333 | 2.893202767 |
| Pou5f1        | chr17:35642976-35647722   | 2.734587667 | 0.269265667 |
| Fst           | chr13:115242469-115248938 | 2.733748333 | 4.55942     |
| Zfat          | chr15:67915299-68090418   | 2.733712    | 1.312080667 |
| Agbl4         | chr4:110070395-111330115  | 2.732826667 | 0.603923    |
| Vps18         | chr2:119114477-119124189  | 2.732401    | 6.106166667 |
| Zfp637        | chr6:117791259-117795974  | 2.732203333 | 4.190706667 |
| Plcxd1        | chr5:110528987-110534971  | 2.731148    | 1.482588333 |
| 2200002K05Rik | chr9:15043488-15063857    | 2.730593333 | 2.213256    |
| Rnase4        | chr14:51710751-51725826   | 2.729166    | 15.47704667 |
| Alpk1         | chr3:127373227-127483445  | 2.727996667 | 2.180131667 |
| Cks1b         | chr3:89219393-89222213    | 2.727716333 | 7.62928     |
| Atad5         | chr11:79902901-79949293   | 2.72667     | 1.608409    |
| Ankrd13d      | chr19:4270179-4283137     | 2.726423333 | 4.616996333 |
| Mpi           | chr9:57392074-57400559    | 2.72453     | 2.609846667 |
| Nav1          | chr1:137331156-137481932  | 2.723863333 | 6.155173333 |
| Slc25a40      | chr5:8422849-8454793      | 2.723159333 | 5.11717     |
| Tfeb          | chr17:47873985-47929365   | 2.723065333 | 1.00221     |
| Tsr2          | chrX:147521636-147531086  | 2.72174     | 3.719833333 |
| Taf1c         | chr8:122121873-122129140  | 2.719553333 | 0.993074333 |
| Slc37a3       | chr6:39284769-39327706    | 2.719073333 | 6.947886667 |
| Glr3          | chr3:80647525-80717546    | 2.717116667 | 2.726236667 |
| Frdm6         | chr12:71926500-72003221   | 2.71565     | 4.749023333 |
| Krtap13-1     | chr16:88729106-88729856   | 2.71216     | 6.02611     |
| 4931414P19Rik | chr14:55202499-55224745   | 2.711551333 | 2.167440667 |
| Stk17b        | chr1:53812355-53842059    | 2.711076667 | 11.17414    |
| 2310057N15Rik | chr16:88773425-88774451   | 2.71        | 10.08068    |
| Cnpy4         | chr5:138628762-138635122  | 2.709436667 | 9.773       |
| Top2a         | chr11:98854260-98885503   | 2.70657     | 7.14491     |
| Ttc26         | chr6:38331523-38377647    | 2.70621     | 2.663585    |
| Fam185a       | chr5:20930720-20987942    | 2.704919333 | 13.20363333 |
| Acot9         | chrX:151697042-151732050  | 2.704139333 | 9.049483333 |
| Trim47        | chr11:115967063-115971549 | 2.702838333 | 2.588466667 |
| Scfd2         | chr5:74600840-74927774    | 2.701713333 | 1.86056     |
| 1700030K09Rik | chr8:74967778-74984440    | 2.700633333 | 2.42886     |
| lck           | chr9:77956998-78019916    | 2.700436667 | 6.955773333 |



|               |                           |             |             |
|---------------|---------------------------|-------------|-------------|
| G6b           | chr17:35201381-35202541   | 2.70011     | 0           |
| Gemin5        | chr11:57933502-57982041   | 2.699273333 | 5.821486667 |
| Parp11        | chr6:127403740-127444257  | 2.698066333 | 3.66434     |
| Cebpb         | chr2:167514414-167515918  | 2.696986    | 1.023861667 |
| Bfsp1         | chr2:143652263-143688909  | 2.695892    | 2.654929    |
| Fam158a       | chr14:56200360-56204091   | 2.694782667 | 2.55359     |
| E130309D14Rik | chr11:74433106-74455018   | 2.694052    | 0.316642667 |
| Gramd4        | chr15:85888124-85968066   | 2.693993333 | 1.609605    |
| Dhrs13        | chr11:77845814-77851366   | 2.691526667 | 3.33111     |
| Eno4          | chr19:59017914-59045911   | 2.690723333 | 1.636738233 |
| Tril          | chr6:53765461-53770819    | 2.689063333 | 7.068566667 |
| Rgmb          | chr17:15943216-15963550   | 2.68807     | 7.72688     |
| Rnf125        | chr18:21103125-21142349   | 2.686548667 | 2.689981667 |
| Fbxl7         | chr15:26470213-26825319   | 2.685946667 | 0.762219333 |
| Ptprcap       | chr19:4154645-4156710     | 2.685157667 | 13.935121   |
| Nfatc2ip      | chr7:133526367-133540251  | 2.682701    | 4.496037667 |
| Pigy          | chr6:57634732-57642072    | 2.68137     | 4.765186667 |
| Lipt1         | chr1:37929050-37933143    | 2.680598333 | 1.603908    |
| Srpx2         | chrX:130442964-130466989  | 2.679119    | 26.48126667 |
| Chadl         | chr15:81516596-81527717   | 2.67799     | 1.051696667 |
| Zfp819        | chr7:50862538-50873649    | 2.676736333 | 0           |
| Hpse          | chr5:101108504-101148702  | 2.676701567 | 0.600099    |
| Epb4.1l3      | chr17:69506149-69639327   | 2.675206667 | 5.36615     |
| Wdr89         | chr12:76731580-76770524   | 2.674353333 | 3.392323333 |
| 4930486F22Rik | chr10:85558598-85576330   | 2.6743      | 3.6623      |
| Six2          | chr17:86083607-86087594   | 2.673382333 | 2.97133     |
| Ypel1         | chr16:17070403-17086781   | 2.67008     | 11.78644667 |
| Wipf3         | chr6:54402876-54453762    | 2.66769     | 2.40031     |
| Ttc22         | chr4:106295053-106312792  | 2.665851667 | 12.15621667 |
| Sp6           | chr11:96874882-96886052   | 2.665553333 | 8.716706667 |
| Fbxl22        | chr9:66356265-66362400    | 2.66462     | 2.101451    |
| Atxn7l2       | chr3:108005172-108013852  | 2.664604333 | 3.030459667 |
| Smarcd3       | chr5:24098439-24107820    | 2.664059333 | 4.559043333 |
| BC061194      | chr2:18620648-18671232    | 2.662930667 | 0           |
| 4930419G24Rik | chr3:32923698-32987529    | 2.661773667 | 5.875828333 |
| A130040M12Rik | chr13:62184506-62397849   | 2.66127     | 2.702146667 |
| Zfp708        | chr13:67170333-67198912   | 2.659863333 | 1.496563333 |
| Ppap2b        | chr4:104829951-104905372  | 2.657903333 | 10.76285333 |
| Sfmbt1        | chr14:31528034-31635907   | 2.657626667 | 1.412113333 |
| Gm8615        | chr5:149965703-149967768  | 2.65587     | 2.245475267 |
| Ahdc1         | chr4:132567420-132634025  | 2.653596667 | 8.454453333 |
| Dyx1c1        | chr9:72806591-72820874    | 2.652926667 | 1.0401404   |
| 2310014F07Rik | chr9:50296903-50312910    | 2.650654    | 2.013963333 |
| Alg6          | chr4:99382320-99430151    | 2.650106667 | 3.854423333 |
| Elmod2        | chr8:85836530-85856385    | 2.6495      | 5.146853333 |
| Ttl           | chr2:128891682-128922019  | 2.649414    | 1.75649     |
| Ccno          | chr13:113778009-113780986 | 2.6461281   | 0.708       |
| Gng4          | chr13:13876805-13920162   | 2.645956667 | 24.33966667 |
| Gm14478       | chrX:10895411-10895853    | 2.644666667 | 0.0949088   |
| Cxxc4         | chr3:133899458-133925053  | 2.642333    | 1.145632667 |
| Nr2c2ap       | chr8:72655231-72657647    | 2.641153333 | 4.887933333 |
| Galnt12       | chr4:47104824-47135914    | 2.63986     | 15.48583667 |

|               |                           |             |             |
|---------------|---------------------------|-------------|-------------|
| Zmynd19       | chr2:24805321-24814933    | 2.638576667 | 1.89698     |
| Frem3         | chr8:83134937-83219456    | 2.633791    | 1.894216667 |
| BC018242      | chr9:21742717-21753351    | 2.633473333 | 7.06665     |
| Elp4          | chr2:105540265-105744657  | 2.63063     | 4.782927667 |
| Gm3383        | chr14:5923635-5933553     | 2.630374667 | 0.678953667 |
| Cdk18         | chr1:134010123-134036262  | 2.629356667 | 3.360126667 |
| Otud1         | chr2:19579688-19582217    | 2.62814     | 5.056803333 |
| Cdh24         | chr14:55250828-55260201   | 2.62796     | 8.801493333 |
| Mycl1         | chr4:122673341-122679723  | 2.627576667 | 16.4071     |
| Cox6a2        | chr7:135348948-135349880  | 2.626546667 | 0           |
| Gpr63         | chr4:24900565-24936380    | 2.62603     | 3.594803333 |
| 4933439K11Rik | chr1:174471750-174480937  | 2.625130333 | 14.13128133 |
| Tbc1d16       | chr11:119004356-119089813 | 2.624026667 | 2.431236667 |
| Sco2          | chr15:89202067-89204249   | 2.620503333 | 3.02E-77    |
| Ces1e         | chr8:95725116-95753518    | 2.618349667 | 0.054169667 |
| BC031361      | chr16:38085149-38089346   | 2.618085    | 2.29137     |
| Vmn2r29       | chr7:7165706-7231000      | 2.61754     | 6.52587     |
| Tacc3         | chr5:34000795-34014846    | 2.617379667 | 3.415493333 |
| Ankrd60       | chr2:173394161-173403842  | 2.616666667 | 0           |
| Mkks          | chr2:136699516-136717142  | 2.610746333 | 7.651516667 |
| Fam203a       | chr15:76199327-76201841   | 2.609762333 | 4.46217     |
| Ddx51         | chr5:111082469-111089515  | 2.607899667 | 5.773746667 |
| Cep57l1       | chr10:41438645-41529674   | 2.606986667 | 7.9218      |
| Doc2g         | chr19:4003384-4007005     | 2.606735333 | 5.929174333 |
| Map4k2        | chr19:6341249-6353527     | 2.600336    | 11.84785333 |
| Prss36        | chr7:135076151-135090239  | 2.59983     | 2.191745    |
| Zfp942        | chr17:22063929-22099431   | 2.59962     | 2.315746667 |
| Rom1          | chr19:9001871-9003846     | 2.59905     | 2.677123333 |
| 2410075B13Rik | chr15:75810301-75812715   | 2.598646667 | 2.052825333 |
| Fam113a       | chr2:130243419-130250377  | 2.598230333 | 3.343296667 |
| Serpib9c      | chr13:33241143-33251623   | 2.593223333 | 8.158576667 |
| 4930547E14Rik | chr16:59636770-59672819   | 2.592338333 | 0.331626333 |
| Zfp36l2       | chr17:84583268-84587287   | 2.59187     | 5.0802      |
| Hacl1         | chr14:32420411-32454151   | 2.590606667 | 2.839033333 |
| 1700034I23Rik | chr3:40704120-40706465    | 2.588643333 | 0.577304567 |
| Zpld1         | chr16:55225287-55283350   | 2.587673333 | 1.357528667 |
| Zfp316        | chr5:144011373-144031701  | 2.587433333 | 1.3841368   |
| Aox1          | chr1:58086812-58163254    | 2.587006667 | 3.89038     |
| Zfp442        | chr2:150232872-150277230  | 2.586543333 | 2.8949      |
| B4galnt1      | chr10:126602211-126609396 | 2.586327333 | 10.83691    |
| Ctsh          | chr9:89949104-89970933    | 2.58462     | 3.976340333 |
| Zswim4        | chr8:86734840-86760941    | 2.58253     | 12.18154    |
| Bcat2         | chr7:52825522-52845080    | 2.581703333 | 4.163403333 |
| Ryr1          | chr7:29788358-29910170    | 2.581356667 | 0.013338753 |
| Smad3         | chr9:63494573-63605801    | 2.580783333 | 11.32770667 |
| Mocos         | chr18:24812191-24860057   | 2.580626667 | 8.16368     |
| Frk           | chr10:34203205-34331036   | 2.580596667 | 8.86525     |
| Setmar        | chr6:108015039-108027114  | 2.57644     | 2.635496667 |
| Lrrc14        | chr15:76541169-76545521   | 2.575416667 | 5.86291     |
| Dpp7          | chr2:25207809-25211852    | 2.575235333 | 7.69419     |
| 6530402F18Rik | chr2:29100635-29108513    | 2.572576667 | 3.615578    |
| Gm6568        | chrX:153978616-153979714  | 2.572456667 | 14.9485     |

|               |                           |             |             |
|---------------|---------------------------|-------------|-------------|
| Zc4h2         | chrX:92834535-92853771    | 2.572067    | 7.09136     |
| Sparc         | chr11:55208002-55233582   | 2.571685    | 9.219896667 |
| Dync1i1       | chr6:5675638-5978039      | 2.571089333 | 1.014643333 |
| Cldn10        | chr14:119187092-119273747 | 2.568213333 | 7.858839667 |
| Arhgef26      | chr3:62142698-62266143    | 2.5653987   | 2.990656667 |
| Tap2          | chr17:34341423-34353266   | 2.564855667 | 2.562233333 |
| Gm14295       | chr2:176583304-176593409  | 2.563816667 | 1.059396    |
| Muc15         | chr2:110561764-110578120  | 2.559623667 | 10.10336    |
| Cldn1         | chr16:26356731-26371925   | 2.558670667 | 22.18636667 |
| Rtel1         | chr2:181054428-181091321  | 2.556323333 | 4.94549     |
| Dsg1c         | chr18:20405840-20442424   | 2.555923667 | 8.991886667 |
| Tnik          | chr3:28162135-28569507    | 2.555506667 | 0.3036191   |
| Rnft1         | chr11:86298158-86312509   | 2.555503333 | 3.110916667 |
| 5330426P16Rik | chr16:50726863-50732886   | 2.551396667 | 8.336626667 |
| H2-DMb1       | chr17:34290135-34297174   | 2.55124     | 2.636690333 |
| Gm14478       | chrX:10898578-10899020    | 2.54671     | 0.055161467 |
| Krt32         | chr11:99942161-99949540   | 2.546632    | 3.7363045   |
| Mylpf         | chr7:134355121-134357801  | 2.54514     | 2.113583333 |
| Gm12216       | chr11:53598990-53672758   | 2.544481767 | 0           |
| Hspb6         | chr7:31338320-31340458    | 2.543546667 | 6.124306667 |
| Gm13283       | chr4:88406677-88407488    | 2.54338     | 0.043869467 |
| Peli2         | chr14:48740543-48880558   | 2.53976     | 4.958136667 |
| Hist1h2ag     | chr13:22134345-22134818   | 2.539456667 | 2.667223333 |
| Zfp280b       | chr10:75495356-75505714   | 2.537319667 | 4.913833333 |
| Ttc9          | chr12:82732355-82765928   | 2.536344333 | 3.988405467 |
| Npy1r         | chr8:69221320-69230697    | 2.53422     | 6.354547333 |
| Fcgr3         | chr1:172981299-172989534  | 2.532793333 | 0           |
| Tfap4         | chr16:4544660-4559720     | 2.532676333 | 2.000991    |
| Atp10a        | chr7:65913571-66084796    | 2.532479333 | 1.846680333 |
| Arrb2         | chr11:70246154-70254176   | 2.53172     | 4.654061    |
| 0610010B08Rik | chr2:175017505-175163713  | 2.531593333 | 0.945038333 |
| Lrrk2         | chr15:91503654-91646555   | 2.53075     | 2.482857333 |
| Dnahc11       | chr12:119116454-119437516 | 2.53053     | 9.366003333 |
| 4632415K11Rik | chr8:122284486-122302316  | 2.529261    | 0.332231333 |
| Gcat          | chr15:78861303-78872961   | 2.528954    | 8.88126     |
| Figf          | chrX:160811479-160840579  | 2.526110333 | 1.669183667 |
| Rassf10       | chr7:120097475-120100972  | 2.523063    | 2.56162     |
| Ccdc86        | chr19:11015970-11023756   | 2.522719667 | 2.545053333 |
| 2410124H12Rik | chr16:92478986-92497610   | 2.521686667 | 0           |
| Ccdc8         | chr7:17579936-17581994    | 2.520422333 | 0.886433    |
| Mettl7a2      | chr15:100183630-100192250 | 2.51959     | 2.918103333 |
| Cd97          | chr8:86247149-86265210    | 2.519496667 | 9.032793333 |
| Gabrb2        | chr11:42233258-42446093   | 2.519356667 | 0.042310533 |
| Hist4h4       | chr6:136750073-136752952  | 2.51856     | 0.424894    |
| Ppil6         | chr10:41210244-41234094   | 2.518264667 | 10.61088667 |
| Cgref1        | chr5:31235515-31247853    | 2.518176667 | 7.188963    |
| Gm505         | chr8:127421785-127427713  | 2.517123333 | 4.353236667 |
| Lce3c         | chr3:92748407-92749652    | 2.51456     | 10.22129    |
| Rbm41         | chrX:136424049-136533134  | 2.51321     | 5.317656667 |
| Plekho2       | chr9:65402190-65427841    | 2.510714667 | 0.247912567 |
| Gm9776        | chr13:95126703-95128878   | 2.506347667 | 0.985969    |
| Amacr         | chr15:10911510-10926379   | 2.505763333 | 3.667796667 |

|               |                           |             |             |
|---------------|---------------------------|-------------|-------------|
| Tmsb15l       | chrX:133489528-133511413  | 2.505359    | 7.248766667 |
| Enho          | chr4:41585176-41587335    | 2.503626667 | 0.742014    |
| Sac3d1        | chr19:6116003-6118586     | 2.50189     | 2.913523333 |
| 1190007F08Rik | chr4:153394578-153400153  | 2.501726667 | 4.31672     |
| Zbtb39        | chr10:127176593-127184395 | 2.49908     | 7.72799     |
| Lfng          | chr5:141083294-141091499  | 2.498203333 | 7.714363333 |
| Extl1         | chr4:133912287-133928462  | 2.495506667 | 8.458693333 |
| Sgms2         | chr3:131021903-131047841  | 2.495486667 | 2.617134267 |
| B4galt4       | chr16:38742376-38769158   | 2.495241    | 14.76202333 |
| Adat1         | chr8:114490807-114516202  | 2.493636667 | 3.441147667 |
| Hist1h4n      | chr13:21903652-21903964   | 2.493076667 | 4.097073333 |
| Prdm9         | chr17:15680042-15700287   | 2.492547    | 1.571270667 |
| Wdr92         | chr11:17111895-17135203   | 2.491763333 | 0.849380333 |
| Ak7           | chr12:106944191-107020657 | 2.491293333 | 3.540954133 |
| Wdr96         | chr19:47811346-47911851   | 2.489736667 | 3.412322    |
| Wdr25         | chr12:110132481-110266662 | 2.487807    | 0.548327    |
| Unc13d        | chr11:115923409-115939275 | 2.487548333 | 0.258494333 |
| AW146020      | chr6:81873662-81909092    | 2.486       | 3.05293     |
| Cd1d1         | chr3:86799757-86803262    | 2.485623667 | 1.57434     |
| 2500004C02Rik | chr2:153166892-153171546  | 2.482643333 | 10.64539333 |
| Rnf39         | chr17:37079995-37084931   | 2.480536667 | 16.55652667 |
| Zfp870        | chr17:33016165-33028548   | 2.4784072   | 1.158293667 |
| Olfr107       | chr17:37542421-37543454   | 2.478316667 | 0           |
| Tspan2        | chr3:102538692-102576233  | 2.478013333 | 5.479256333 |
| Lrrc25        | chr8:73140742-73144749    | 2.47634     | 2.554606667 |
| Gpr125        | chr5:50351189-50450235    | 2.475976667 | 9.078033333 |
| Zfp341        | chr2:154439103-154472553  | 2.474373667 | 4.027246667 |
| Cecr5         | chr6:120459511-120481317  | 2.473709333 | 6.075892667 |
| Tagln         | chr9:45737710-45744141    | 2.473679    | 1.825544333 |
| Zfp879        | chr11:50645536-50655054   | 2.47184     | 0.865830667 |
| Sun3          | chr11:8916056-8948994     | 2.470949    | 2.425081    |
| 4732471D19Rik | chr13:54605165-54652651   | 2.468393333 | 4.643666667 |
| Lama3         | chr18:12492532-12741521   | 2.46794     | 10.70703333 |
| 6430598A04Rik | chr5:138172190-138181226  | 2.467920667 | 1.389896667 |
| Pdss2         | chr10:42941291-43184688   | 2.467526    | 7.573663333 |
| Nudt15        | chr14:73919670-73948049   | 2.466236167 | 1.271410333 |
| Camkk1        | chr11:72832509-72855567   | 2.464436667 | 2.852550667 |
| Grk5          | chr19:60965651-61168458   | 2.462966667 | 3.740346667 |
| Gm11549       | chr3:36413978-36420367    | 2.45913     | 0.049902333 |
| Sox7          | chr14:64562542-64569569   | 2.45899     | 3.379355    |
| Bckdha        | chr7:26414870-26443780    | 2.458491333 | 5.928403333 |
| Psapl1        | chr5:36546669-36549216    | 2.457773333 | 14.22076    |
| 4930539J05Rik | chr3:135099186-135101629  | 2.457316667 | 23.88318    |
| 2810417H13Rik | chr9:65738129-65751358    | 2.456468    | 2.702533    |
| Aoc2          | chr11:101186376-101191008 | 2.454781333 | 1.006246667 |
| Pop1          | chr15:34425065-34460408   | 2.449048667 | 0.904625333 |
| Stx11         | chr10:12659786-12684065   | 2.445262    | 1.097094833 |
| Il23a         | chr10:127733195-127735140 | 2.444956333 | 0.7626069   |
| Cnih4         | chr1:183081061-183099125  | 2.444106667 | 5.735023333 |
| Pigr          | chr1:132723260-132748826  | 2.443796333 | 7.626833333 |
| Fhl2          | chr1:43179918-43220806    | 2.443781333 | 5.94128     |
| Saal1         | chr7:53941477-53966021    | 2.442403333 | 2.437403333 |

|               |                           |             |             |
|---------------|---------------------------|-------------|-------------|
| F830016B08Rik | chr18:60453033-60462670   | 2.440882333 | 0.015492367 |
| Sco1          | chr11:66866171-66880942   | 2.438984    | 3.944653333 |
| Mdm1          | chr10:117578842-117606055 | 2.438846667 | 6.655206667 |
| 3110070M22Rik | chr13:120276063-120277191 | 2.43709     | 9.600369428 |
| Cno           | chr5:37138612-37139918    | 2.436013333 | 2.667709667 |
| Zfp296        | chr7:20162635-20166005    | 2.435194667 | 5.237243333 |
| Gm9961        | chr16:11901456-11930687   | 2.434291667 | 0.102019667 |
| Apaf1         | chr10:90452055-90545488   | 2.434056667 | 2.743346667 |
| Serpnb3b      | chr1:109050537-109057691  | 2.433443333 | 8.078426667 |
| Clybl         | chr14:122580915-122801456 | 2.433163333 | 2.59181     |
| Zfp202        | chr9:39999900-40021189    | 2.432993667 | 1.511893333 |
| Aldh16a1      | chr7:52397209-52409908    | 2.431756667 | 4.113013333 |
| Gm10677       | chr9:47607242-47626291    | 2.431674333 | 2.124853333 |
| Tmprss11g     | chr5:86914901-86947625    | 2.43037     | 0.417678667 |
| Zfp354c       | chr11:50624586-50641233   | 2.430162333 | 8.664186667 |
| Zfp939        | chr7:46704887-46732786    | 2.428543333 | 3.841123333 |
| B4galt2       | chr4:117545604-117556081  | 2.425050333 | 3.08942     |
| Gsdmc4        | chr15:63722819-63743852   | 2.423596667 | 0.223405467 |
| Zfp184        | chr13:22036962-22052354   | 2.42263     | 3.818353333 |
| Zfp71-rs1     | chr13:67806242-67830110   | 2.42199     | 4.319556667 |
| Gm3383        | chr14:6727191-6737109     | 2.421007667 | 0.693146333 |
| Serpini1      | chr3:75361454-75446445    | 2.420432333 | 29.27466667 |
| Sumf2         | chr5:130322865-130339827  | 2.420002414 | 1.270532033 |
| Zfp275        | chrX:70587958-70604419    | 2.419846667 | 3.904133333 |
| Rhbdf2        | chr11:116459478-116488333 | 2.416533333 | 1.745913333 |
| D830031N03Rik | chr4:123080843-123089154  | 2.415660333 | 6.610123333 |
| Paqr5         | chr9:61801544-61874597    | 2.414503333 | 1.977050667 |
| Asb3          | chr11:30854397-31002704   | 2.412823333 | 6.909003333 |
| Cd320         | chr17:33980035-33986719   | 2.412221333 | 12.56293    |
| Prph          | chr15:98885604-98889409   | 2.411719    | 0.218479333 |
| Tifa          | chr3:127492830-127501307  | 2.411468333 | 4.586287    |
| Wdr90         | chr17:25981678-25998460   | 2.410436667 | 3.465263333 |
| Pcdhb11       | chr18:37581071-37584686   | 2.409193333 | 5.455003333 |
| Suv39h2       | chr2:3373086-3392258      | 2.407629333 | 4.127073333 |
| Mthfsd        | chr8:123621456-123632279  | 2.406909    | 4.501385333 |
| Adc           | chr4:128609389-128639661  | 2.405971667 | 5.329217    |
| Rhof          | chr5:123568188-123582638  | 2.40482     | 1.884568333 |
| Zfp239        | chr6:117813094-117822784  | 2.404386667 | 1.610523333 |
| Clca5         | chr3:144733228-144762005  | 2.403164333 | 8.73862     |
| Taf4b         | chr18:14941753-15058868   | 2.402613667 | 1.681831667 |
| Crlf2         | chr5:109983727-109988012  | 2.401613333 | 0.916433333 |
| Glpr1         | chr10:111422503-111434320 | 2.400246698 | 4.17E-07    |
| 5730422E09Rik | chr5:149931140-149993612  | 2.40008     | 0.961163333 |
| Zfp770        | chr2:114019196-114027168  | 2.39831     | 2.1385349   |
| Gtf2ird2      | chr5:134659907-134694013  | 2.398261667 | 2.192031    |
| Lypd6b        | chr2:49643205-49804366    | 2.397857    | 25.54175667 |
| Ece2          | chr16:20611673-20645988   | 2.397413333 | 7.597673333 |
| Zcchc4        | chr5:53174305-53211004    | 2.394669667 | 0.688329    |
| L2hgdh        | chr12:70791422-70825861   | 2.39404     | 11.25707333 |
| A330076H08Rik | chr7:69088786-69127189    | 2.393252667 | 0.209436333 |
| Pitpnm1       | chr19:4100116-4113965     | 2.39192     | 4.164723333 |
| Cotl1         | chr8:122333113-122364479  | 2.390214667 | 0.808832667 |

|               |                           |             |             |
|---------------|---------------------------|-------------|-------------|
| Armc5         | chr7:135380870-135388614  | 2.388956667 | 2.409203333 |
| Rnaseh1       | chr12:29334466-29344456   | 2.388774333 | 14.25439333 |
| Osbp2         | chr11:3603733-3763906     | 2.38854     | 0.8023042   |
| Trem12        | chr17:48439362-48451859   | 2.387353333 | 0           |
| Polr1e        | chr4:45031496-45046564    | 2.386587333 | 2.951965    |
| Vps37d        | chr5:135548769-135554136  | 2.384643333 | 2.303953333 |
| Synpo         | chr18:60753643-60783959   | 2.382543333 | 3.30746     |
| BC023829      | chrX:67713230-67730218    | 2.380262333 | 1.875260333 |
| Zfp229        | chr17:21870690-21885936   | 2.380116667 | 3.558956667 |
| Cacnb2        | chr2:14525932-14909535    | 2.38006     | 4.19269     |
| Xrcc3         | chr12:113041403-113052052 | 2.37993     | 7.410266667 |
| Gm10804       | chr2:93292975-93310031    | 2.376       | 0.204559667 |
| 1110002L01Rik | chr12:3403882-3426747     | 2.375058333 | 2.385230667 |
| Uxt           | chrX:20528790-20539104    | 2.374359    | 1.303935667 |
| 2410002I01Rik | chr11:119951835-119960045 | 2.37431     | 6.354863333 |
| Slc7a4        | chr16:17572110-17576764   | 2.372896667 | 4.896483333 |
| Gm12359       | chr11:98659622-98671403   | 2.37286     | 3.823642    |
| Cryz          | chr3:154259674-154286146  | 2.372773333 | 2.108673333 |
| Olfra458      | chr6:42410074-42411016    | 2.371936667 | 7.343046667 |
| Celf6         | chr9:59426143-59455099    | 2.370815667 | 0.2439768   |
| Slc24a6       | chr5:120961200-120984033  | 2.368731    | 1.83969     |
| 9630033F20Rik | chr6:127035133-127059570  | 2.366834667 | 1.61482     |
| Fabp7         | chr10:57504728-57508256   | 2.365666667 | 0           |
| Kif15         | chr9:122860198-122927851  | 2.363826667 | 1.175664667 |
| Prnd          | chr2:131776596-131781866  | 2.363819667 | 0.237027333 |
| Ccdc114       | chr7:53183767-53204326    | 2.363198    | 1.828246667 |
| Nipsnap1      | chr11:4774005-4794203     | 2.36298     | 18.80596667 |
| Fbxo46        | chr7:19705207-19723610    | 2.3625      | 3.703750333 |
| Zfp53         | chr17:21625951-21647441   | 2.36202     | 2.33034     |
| Zfp862        | chr6:48454337-48484831    | 2.3604      | 1.952080667 |
| 2010002M12Rik | chr19:34691540-34715233   | 2.36029     | 0.576253767 |
| Tubb2a-ps2    | chr12:11889001-11889705   | 2.359656667 | 2.716861667 |
| Trpc2         | chr7:109214226-109244930  | 2.359033333 | 0.763899667 |
| Magix         | chrX:7250291-7258377      | 2.357063    | 0.226342667 |
| Styx          | chr14:45970860-45996559   | 2.355336667 | 4.097993333 |
| Nwd1          | chr8:75170609-75238645    | 2.354935667 | 0.982672333 |
| 1700024B18Rik | chr14:124386856-124414906 | 2.351948    | 2.078637    |
| Clu           | chr14:66587319-66600382   | 2.348850333 | 12.27322667 |
| Dapk3         | chr10:80645751-80655942   | 2.348813333 | 13.55824333 |
| Kcnk7         | chr19:5704475-5707101     | 2.347702667 | 3.494735667 |
| Zdhhc11       | chr13:74101309-74130288   | 2.347560333 | 0.0257441   |
| Hist1h3a      | chr13:23853721-23854255   | 2.347183333 | 2.412508    |
| Ccdc37        | chr6:90353729-90378474    | 2.34712     | 0.397796667 |
| Cdc45         | chr16:18780539-18812065   | 2.346233333 | 1.678496667 |
| Mkx           | chr18:6934963-7004777     | 2.343253333 | 0.989422667 |
| Stk36         | chr1:74648028-74683467    | 2.342626667 | 4.89109     |
| Rhobtb2       | chr14:70184796-70205352   | 2.340023333 | 4.071566667 |
| Rnf215        | chr11:4035162-4041195     | 2.33922     | 3.468904    |
| Commd5        | chr15:76730370-76731727   | 2.338920667 | 8.892803333 |
| Mpp3          | chr11:101860966-101888269 | 2.338906667 | 0.213319    |
| Acta2         | chr19:34315580-34329826   | 2.336609667 | 6.917552667 |
| Gm14057       | chr2:130627701-130629837  | 2.33594     | 3.51715     |

|               |                           |             |             |
|---------------|---------------------------|-------------|-------------|
| Mcm2          | chr6:88833467-88848774    | 2.335473333 | 26.7989     |
| Meis3         | chr7:16760728-16771852    | 2.3341      | 11.11959    |
| D130020L05Rik | chr12:102320660-102327137 | 2.333581333 | 0.392230667 |
| Prkab2        | chr3:97462134-97476990    | 2.333555333 | 5.316186667 |
| Acads         | chr5:115560307-115569322  | 2.333484333 | 3.959643333 |
| Asphd1        | chr7:134089521-134093095  | 2.33279     | 0.401149    |
| Grm5          | chr7:94732677-95283573    | 2.330723333 | 0.22541     |
| Foxe3         | chr4:114597751-114598618  | 2.3304      | 3.91855     |
| Notch3        | chr17:32257837-32303797   | 2.326646667 | 6.150596667 |
| Clec2g        | chr6:128884398-128934725  | 2.325459    | 1.579965333 |
| Opn1sw        | chr6:29326670-29330513    | 2.324998667 | 5.188271667 |
| Gm5141        | chr13:62873559-62887168   | 2.324123333 | 1.142954667 |
| Dnajb13       | chr7:107651528-107663324  | 2.321185    | 3.302696667 |
| Pgap1         | chr1:54529843-54614528    | 2.320783333 | 6.886393333 |
| Traf2         | chr2:25373501-25402414    | 2.32064     | 0.956706333 |
| Gsg2          | chr11:72948985-72951796   | 2.3205305   | 1.367601    |
| Peo1          | chr19:45081047-45087252   | 2.320273333 | 2.38547     |
| Gm11127       | chr17:36192760-36195316   | 2.318616667 | 0.925136333 |
| 1110028F11Rik | chr11:87513025-87518829   | 2.317663333 | 3.72185     |
| Igdcc3        | chr9:64988995-65033677    | 2.31616     | 0.076568667 |
| 1700001K19Rik | chr12:111905898-111920829 | 2.315006667 | 5.399513667 |
| Baat1         | chr5:141180976-141195288  | 2.31414     | 4.297956667 |
| Gm7030        | chr17:36264553-36266370   | 2.31328     | 1.372445333 |
| H2-T9         | chr17:36175353-36179637   | 2.31266673  | 5.1525      |
| Cyp3a13       | chr5:138334160-138362847  | 2.312509067 | 1.3714541   |
| Sh3pxd2b      | chr11:32247810-32328183   | 2.310063333 | 3.497367    |
| B230206H07Rik | chr7:148545076-148551009  | 2.309350667 | 4.406509333 |
| Serpina9      | chr12:105234829-105251862 | 2.307427333 | 5.389326667 |
| Spsb1         | chr4:149270392-149329115  | 2.30641     | 5.33977     |
| Lmnb1         | chr18:56867466-56913079   | 2.30535     | 7.534456667 |
| E330012B07Rik | chr6:147128762-147156816  | 2.303379667 | 1.604626667 |
| Dennd1b       | chr1:140860285-141072619  | 2.303053333 | 4.639256667 |
| Dlgap2        | chr8:14095874-14847686    | 2.2972      | 3.66954     |
| Rragb         | chrX:149574500-149606486  | 2.29712     | 1.735883333 |
| Pde3b         | chr7:121558767-121681451  | 2.296226667 | 0.642880333 |
| Il13ra1       | chrX:33652133-33711256    | 2.295726667 | 20.72686667 |
| Acvr2b        | chr9:119311618-119342624  | 2.295023333 | 0.77912     |
| Gm17801       | chr17:25411068-25412473   | 2.293253333 | 0.070917    |
| Lrrc4         | chr6:28778125-28781747    | 2.289537    | 5.783162333 |
| A930001C03Rik | chr19:4439322-4448325     | 2.288943333 | 0.052721667 |
| Sgcd          | chr11:46792284-47192804   | 2.28651     | 5.381903333 |
| Hrh3          | chr2:179834177-179838927  | 2.28588     | 11.12638333 |
| Ropn1l        | chr15:31370964-31383444   | 2.285248333 | 4.177536667 |
| Pgap3         | chr11:98249985-98261804   | 2.284883667 | 2.187527333 |
| Eri2          | chr7:126927339-126937572  | 2.28241     | 6.8481      |
| Zfp808        | chr13:62231249-62275296   | 2.282326333 | 0.372942667 |
| Tbc1d2b       | chr9:90096886-90165607    | 2.281636333 | 3.066846333 |
| Tmem88b       | chr4:155155699-155159983  | 2.280699333 | 5.168453    |
| Suv39h1       | chrX:7638296-7651886      | 2.279073333 | 3.282647667 |
| Gm3383        | chr14:5541919-5551837     | 2.276360667 | 0.611279667 |
| Lrrn4cl       | chr19:8925274-8928399     | 2.275891    | 0.11886122  |
| Farp2         | chr1:95408680-95518553    | 2.273093667 | 2.516446667 |

|               |                           |             |             |
|---------------|---------------------------|-------------|-------------|
| Upk2          | chr9:44260797-44262850    | 2.27309     | 2.58076     |
| Gp1ba         | chr11:70452623-70455557   | 2.272768333 | 1.020537333 |
| 2310003H01Rik | chr11:120230875-120240060 | 2.272123333 | 3.75024     |
| Dclre1b       | chr3:103604527-103613310  | 2.27194     | 1.478431333 |
| Rapgef4       | chr2:71819271-72095531    | 2.26946     | 7.946976667 |
| Gm3264        | chr14:4974180-4978876     | 2.268326667 | 1.163136667 |
| Setd4         | chr16:93583705-93604060   | 2.265945    | 1.210643667 |
| Gm16516       | chr11:60734442-60745369   | 2.265173333 | 0.848881667 |
| Gm5595        | chr7:49915477-49948088    | 2.264876667 | 2.524983333 |
| Relt          | chr7:107994361-108011927  | 2.264783333 | 1.501389333 |
| Fgf16         | chrX:102959815-102971871  | 2.264042667 | 0.822102867 |
| Zfp58         | chr13:67591102-67601458   | 2.262125667 | 2.364326667 |
| Lpar5         | chr6:125017937-125032490  | 2.260946667 | 2.925903333 |
| Vat1l         | chr8:116729539-116897970  | 2.260345    | 0.599265667 |
| Best1         | chr19:10059661-10076123   | 2.259986667 | 1.806005367 |
| 4632415L05Rik | chr3:19794870-19798984    | 2.259681    | 5.036663333 |
| Cald1         | chr6:34659443-34725469    | 2.257712667 | 9.40453     |
| Sox15         | chr11:69468538-69470229   | 2.256605667 | 10.73732    |
| Tpbp          | chr9:85735986-85740662    | 2.25523     | 8.824633333 |
| Actr3b        | chr5:25265843-25356159    | 2.254218667 | 0.3150749   |
| Mtap7d2       | chrX:155852509-155936879  | 2.253487333 | 5.109891667 |
| Kctd7         | chr5:130620757-130631678  | 2.25269     | 0.990096    |
| Plekhh3       | chr11:101023992-101032616 | 2.2521      | 2.74077     |
| Cox6b2        | chr7:4703395-4704696      | 2.251923333 | 5.772633333 |
| Zfp956        | chr6:47903388-47915298    | 2.251873333 | 4.862766    |
| Mtrf1         | chr14:79797578-79823457   | 2.24975     | 4.738036667 |
| Sema4a        | chr3:88239883-88265104    | 2.2491428   | 13.96751    |
| Adcy7         | chr8:90796301-90853861    | 2.248886667 | 0.451751667 |
| Zfp773        | chr7:7083388-7089466      | 2.248503333 | 3.617446333 |
| Fgf15         | chr7:152082436-152086856  | 2.247176667 | 0           |
| Gm10433       | chr12:101426177-101431748 | 2.247035667 | 0.487619333 |
| Hist1h3c      | chr13:23836910-23837390   | 2.246213333 | 1.452372667 |
| Ect2          | chr3:26996143-27052800    | 2.245986667 | 1.891559167 |
| Arl4c         | chr1:90594800-90598766    | 2.24467     | 8.95347     |
| Serpina1b     | chr12:104966365-104976399 | 2.24451     | 0.487053167 |
| Nradd         | chr9:110523638-110526897  | 2.242936667 | 5.763652    |
| 4930594C11Rik | chr1:37542695-37545450    | 2.242906667 | 0.965926667 |
| Katnb1        | chr8:97605100-97623774    | 2.242006667 | 3.46223     |
| Aim1          | chr10:43670112-43724652   | 2.24126     | 8.494373333 |
| Fdxacb1       | chr9:50576342-50580775    | 2.239303333 | 6.414863333 |
| 4933431E20Rik | chr3:107691767-107699131  | 2.233930667 | 5.007649333 |
| Lrrc39        | chr3:116265890-116286052  | 2.232606667 | 2.883956667 |
| Defb48        | chr14:63596360-63603347   | 2.231856667 | 0           |
| Clcn5         | chrX:6735537-6896484      | 2.230116667 | 5.212226667 |
| Thumprd2      | chr17:81425666-81464425   | 2.226541    | 0.364683667 |
| Sh3bgr        | chr16:96422076-96450540   | 2.224587667 | 1.701886667 |
| Nudt12        | chr17:59140823-59152745   | 2.223926667 | 1.327913333 |
| Dcdc2b        | chr4:129285574-129291501  | 2.221033667 | 0.245425333 |
| Hspa13        | chr16:75755435-75767063   | 2.220916667 | 3.777203333 |
| Lekr1         | chr3:65470149-65635084    | 2.218326667 | 6.893266667 |
| Ccdc93        | chr1:123327643-123403037  | 2.217906667 | 6.5582      |
| Lass3         | chr7:73888389-73968578    | 2.217106667 | 9.221666667 |



|               |                           |             |             |
|---------------|---------------------------|-------------|-------------|
| Gmip          | chr8:72332585-72345769    | 2.214856667 | 1.039191667 |
| Fndc4         | chr5:31594618-31598250    | 2.214339333 | 1.728643167 |
| Ccdc87        | chr19:4839365-4842528     | 2.213948667 | 1.12212     |
| Gm4371        | chr15:96013230-96033901   | 2.21362     | 0.144177    |
| Tbc1d8b       | chrX:136219534-136288757  | 2.212946667 | 3.83138     |
| Vwa5b2        | chr16:20589654-20605450   | 2.211506667 | 9.949476667 |
| 9330020H09Rik | chr15:98397754-98401295   | 2.210816667 | 2.030801333 |
| Fam161a       | chr11:22913386-22923741   | 2.210306    | 6.865706667 |
| Ubxn11        | chr4:133658497-133682695  | 2.208727667 | 2.28076     |
| Cxcl5         | chr5:91188324-91190651    | 2.20657     | 0.93956     |
| Cbx8          | chr11:118899749-118902227 | 2.205012    | 1.660876667 |
| Nek5          | chr8:23184087-23235525    | 2.204268333 | 1.702407    |
| Mettl21d      | chr12:70678614-70684015   | 2.203728667 | 4.213893333 |
| Ankrd55       | chr13:113078658-113174210 | 2.200679667 | 0.245798    |
| Ccdc134       | chr15:81958351-81972632   | 2.200493333 | 4.988544667 |
| Lpcat2        | chr8:95379248-95443178    | 2.200450667 | 6.551260333 |
| Pou2af1       | chr9:51021794-51048184    | 2.199620333 | 1.915906667 |
| Evi2b         | chr11:79326886-79344091   | 2.195553333 | 0.684327667 |
| Lrp2bp        | chr8:47095955-47114830    | 2.194616667 | 1.146286    |
| Adat2         | chr10:13272712-13283182   | 2.19458     | 4.74773     |
| Orm2          | chr4:63023482-63026911    | 2.193494    | 1.250771    |
| Zfp248        | chr6:118377336-118405524  | 2.193426667 | 2.471987    |
| Snx8          | chr5:140816256-140865201  | 2.19247     | 4.406593667 |
| Abca12        | chr1:71289663-71461484    | 2.19224     | 8.536813333 |
| Lonrf3        | chrX:33868403-33906851    | 2.192043333 | 2.083554    |
| Bcl11b        | chr12:109148612-109241624 | 2.191308667 | 2.527       |
| Slc8a2        | chr7:16715648-16745860    | 2.191084667 | 0.552465667 |
| Dtwd1         | chr2:125977876-125991013  | 2.190566667 | 5.242903333 |
| Gm16386       | chr17:22916824-22954714   | 2.188643333 | 0.958476667 |
| Homez         | chr14:55471573-55482995   | 2.188011333 | 3.41469     |
| 2900041M22Rik | chr11:117472560-117474731 | 2.18736     | 0.97547     |
| Loxl4         | chr19:42666768-42687296   | 2.185172667 | 2.820596667 |
| Doc2b         | chr11:75582591-75609559   | 2.184806667 | 2.68791     |
| H2-Q4         | chr17:35516561-35521619   | 2.183173333 | 1.931450833 |
| Dcbld2        | chr16:58408647-58469858   | 2.182886667 | 3.765023333 |
| Rai14         | chr15:10498732-10644386   | 2.182818    | 0.460034    |
| Tubb6         | chr18:67550384-67562403   | 2.182426667 | 11.97174333 |
| Axin2         | chr11:108781662-108812095 | 2.1813      | 1.283790667 |
| Pecr          | chr1:72305746-72330888    | 2.180436667 | 3.977327667 |
| Lep           | chr6:29010220-29023876    | 2.180373333 | 0.0581268   |
| Tmco7         | chr8:109206967-109375339  | 2.179772667 | 2.193187    |
| Dmrta2        | chr4:109650629-109656289  | 2.178299667 | 2.19805     |
| Cend1         | chr7:148612349-148615319  | 2.175987    | 0.069746333 |
| Rad51c        | chr11:87191108-87217997   | 2.17593     | 3.419486667 |
| Pdpx          | chr15:78744348-78749947   | 2.175533    | 11.10248333 |
| Comtd1        | chr14:22665082-22668132   | 2.17511     | 2.845123333 |
| Zfp128        | chr7:13466526-13478771    | 2.17461     | 1.015567167 |
| Soat2         | chr15:101981005-101993867 | 2.174306667 | 0           |
| Tmod2         | chr9:75413428-75459132    | 2.173162333 | 6.02438     |
| Fzd4          | chr7:96552875-96558620    | 2.172022    | 3.877966667 |
| Fam189b       | chr3:88987146-88993211    | 2.170825333 | 11.93751    |
| Plau          | chr14:21655883-21662610   | 2.170635167 | 0.4658949   |

|               |                           |             |             |
|---------------|---------------------------|-------------|-------------|
| Serpine3      | chr14:63282503-63311080   | 2.169693    | 0.833180667 |
| Vgll3         | chr16:65815877-65863311   | 2.168792    | 1.954818667 |
| Trdmt1        | chr2:13431787-13466291    | 2.168469333 | 1.402838333 |
| Fam178b       | chr1:36619540-36740028    | 2.168280333 | 0.518171667 |
| Tac4          | chr11:95122842-95130575   | 2.167652    | 3.92676     |
| Oas1c         | chr5:121250207-121262523  | 2.165254    | 2.3458506   |
| Dkk2          | chr3:131748255-131843268  | 2.162950667 | 0.0915601   |
| Gas6          | chr8:13465373-13494535    | 2.160583333 | 16.57140333 |
| Lrrc8e        | chr8:4226826-4237470      | 2.160374667 | 6.040503333 |
| Rad18         | chr6:112569844-112646664  | 2.160165    | 5.119156667 |
| Zfp963        | chr8:72265537-72273861    | 2.158748333 | 0.790714    |
| Klhl22        | chr16:17759713-17793475   | 2.158122333 | 5.855603333 |
| Ttc30a2       | chr2:75814228-75816236    | 2.15695     | 1.193797667 |
| Zfp97         | chr17:17258346-17283842   | 2.15405     | 0.774151667 |
| Echdc1        | chr10:29032971-29066467   | 2.153775333 | 11.75876333 |
| Hk2           | chr6:82675020-82724448    | 2.149832333 | 8.802886667 |
| Gm16596       | chr12:109774611-109793828 | 2.147063333 | 1.431238667 |
| Omg           | chr11:79314483-79317584   | 2.14583     | 1.510274233 |
| Gm17677       | chr9:35548633-35549837    | 2.144406667 | 0           |
| Dnahc17       | chr11:117883036-117990533 | 2.144387667 | 0.679977    |
| Mcm3          | chr1:20793094-20810294    | 2.143706667 | 0.60865     |
| Lgr5          | chr10:114887369-115024836 | 2.143443333 | 3.63195     |
| Synm          | chr7:74875046-74904628    | 2.142055333 | 0.348767    |
| Pole2         | chr12:70302765-70329177   | 2.140365    | 3.008899167 |
| Hr            | chr14:70953862-70973349   | 2.138       | 13.49947333 |
| Rrp15         | chr1:188544964-188573237  | 2.136181    | 6.796586667 |
| Wasf3         | chr5:147196581-147282701  | 2.136151    | 0.237905    |
| Palm          | chr10:79256316-79283641   | 2.135649    | 6.81177     |
| Tymp          | chr15:89202361-89207468   | 2.13514     | 2.119715333 |
| Zbtb42        | chr12:113917050-113920958 | 2.129917667 | 0.643682667 |
| Dbnidd1       | chr8:126028617-126039355  | 2.12871     | 2.090421    |
| Telo2         | chr17:25236513-25252912   | 2.126993333 | 1.123377    |
| 9930014A18Rik | chr15:60654519-60662955   | 2.125916    | 0.0436306   |
| Gal3st1       | chr11:3883638-3899331     | 2.124683333 | 1.423184333 |
| Tpst2         | chr5:112705726-112744376  | 2.123892    | 7.206226667 |
| 2700070H01Rik | chr14:63673909-63676986   | 2.12297     | 0           |
| Als2          | chr1:59219599-59294075    | 2.121276667 | 2.95366     |
| Egln2         | chr7:27943676-27951821    | 2.11958     | 7.391273333 |
| Rnd2          | chr11:101329651-101332620 | 2.11934     | 0.745876667 |
| Zfp456        | chr13:67464519-67476699   | 2.1158      | 0.4819307   |
| Creb5         | chr6:53523367-53645826    | 2.1137074   | 4.67295     |
| 4930556N09Rik | chr10:96498401-96523693   | 2.113382667 | 0           |
| Trim16        | chr11:62633754-62656450   | 2.11254     | 4.807303333 |
| Athl1         | chr7:148127479-148133557  | 2.112104333 | 2.945687333 |
| Fmo5          | chr3:97432726-97459210    | 2.111491667 | 2.380956667 |
| Adig          | chr2:158328347-158333934  | 2.11104     | 0           |
| Gm5126        | chrX:100127385-100129562  | 2.109168267 | 0.153915333 |
| Dleu2         | chr14:62221672-62301210   | 2.10828     | 3.322946667 |
| C77370        | chrX:101272774-101396456  | 2.107803333 | 2.166216667 |
| Pthlh         | chr6:147200631-147212607  | 2.107773333 | 5.041233    |
| Nedd4l        | chr18:65047409-65377480   | 2.107106667 | 4.556816667 |
| Klhl3         | chr13:58106317-58203789   | 2.105898333 | 0.213043333 |

|               |                           |             |             |
|---------------|---------------------------|-------------|-------------|
| Gjb3          | chr4:127002478-127008080  | 2.104924667 | 0.653258667 |
| Smo           | chr6:29685496-29711366    | 2.104893333 | 3.54538     |
| Gm16062       | chr11:59623581-59631864   | 2.104390001 | 9.159100031 |
| Trp53rk       | chr2:166619266-166624992  | 2.10357     | 1.507854333 |
| Ppp1r9a       | chr6:4853319-5115661      | 2.10352     | 3.120848    |
| Vwa2          | chr19:56948905-56986568   | 2.10319     | 5.89465     |
| Pex11a        | chr7:86882149-86887911    | 2.100023333 | 9.01253     |
| Rftn2         | chr1:55227003-55283626    | 2.099413333 | 1.907215667 |
| Zfyve9        | chr4:108311863-108396481  | 2.093606667 | 4.41453     |
| 1700028K03Rik | chr5:107963729-107980561  | 2.092813667 | 3.00376     |
| Sptlc3        | chr2:139319655-139463410  | 2.091652    | 7.106317667 |
| Polr3h        | chr15:81745459-81756643   | 2.090446    | 4.763373333 |
| Gm8348        | chr14:3757740-3778983     | 2.088376667 | 1.152336667 |
| Mastl         | chr2:22972063-23011544    | 2.088003667 | 2.74238     |
| Cdr2l         | chr11:115243229-115257446 | 2.086934    | 3.068791333 |
| Lhfp14        | chr6:113118080-113145378  | 2.086348367 | 2.305984    |
| Fam38a        | chr8:125005597-125075229  | 2.084549667 | 3.215632    |
| Dennd1c       | chr17:57205477-57217933   | 2.083863333 | 9.791806667 |
| Gbp7          | chr3:142193301-142213047  | 2.083677667 | 0.8153088   |
| Ppapdc3       | chr2:31951170-31966340    | 2.0835715   | 1.574443667 |
| Kif2c         | chr4:116832240-116855229  | 2.080386667 | 0.304328    |
| Kctd14        | chr7:104599843-104608067  | 2.080157333 | 2.24657     |
| Olfml3        | chr3:103539316-103541924  | 2.078853333 | 1.197909333 |
| Col4a4        | chr1:82447297-82583424    | 2.071485333 | 0.105264967 |
| Mtr           | chr13:12278806-12350380   | 2.071196667 | 2.33332     |
| Tgm4          | chr9:122943858-122976676  | 2.070520333 | 0.931158    |
| Rgs18         | chr1:146599970-146622551  | 2.069204333 | 0.323150667 |
| 3300002I08Rik | chr2:150136672-150188501  | 2.067353333 | 1.091243    |
| 1700029J07Rik | chr8:47038959-47060606    | 2.062866667 | 8.283983333 |
| Grwd1         | chr7:53080592-53086159    | 2.06268     | 0.016598033 |
| Tlr4          | chr4:66488844-66503830    | 2.061363333 | 0.799473333 |
| Cdc20         | chr4:118105505-118109948  | 2.060945    | 1.287283333 |
| Pcdhb12       | chr18:37595274-37598308   | 2.059336    | 5.63089     |
| Brsk1         | chr7:4642529-4667599      | 2.057451333 | 4.593994    |
| Sobp          | chr10:42722305-42894336   | 2.057013333 | 1.456517667 |
| Mfsd7b        | chr1:192829710-192850069  | 2.05564     | 1.616389    |
| Fzd10         | chr5:129106980-129109968  | 2.054636667 | 7.55593     |
| Vasn          | chr16:4639944-4651166     | 2.052876667 | 2.55007     |
| Gm15412       | chr7:103487992-103490474  | 2.05133     | 2.288536333 |
| Aatk          | chr11:119868631-119908459 | 2.047828667 | 6.47071     |
| Wnt5b         | chr6:119382548-119494365  | 2.04597     | 0.490686    |
| Nmnat1        | chr4:148842895-148859251  | 2.044987333 | 0.512272333 |
| Emp3          | chr7:53173392-53176796    | 2.044863333 | 1.844533333 |
| Prss48        | chr3:85797731-85806413    | 2.04351     | 5.07572     |
| Vtcn1         | chr3:100629381-100700845  | 2.043281533 | 1.159278    |
| Slc6a2        | chr8:95484945-95525566    | 2.040493333 | 2.713736667 |
| Gpr1          | chr1:63229267-63260783    | 2.037123333 | 0.244476    |
| Hic2          | chr16:17233679-17263523   | 2.035225    | 1.891326667 |
| Lpcat1        | chr13:73604830-73651986   | 2.03496     | 1.555711333 |
| Csdc2         | chr15:81767188-81781371   | 2.033731    | 5.284393333 |
| Csta          | chr16:36120031-36131275   | 2.032438667 | 4.677951333 |
| 4933427E11Rik | chr15:74539590-74540804   | 2.031176667 | 0.033510333 |

|               |                           |             |             |
|---------------|---------------------------|-------------|-------------|
| Cyb5r2        | chr7:114891968-114901546  | 2.029591667 | 0.145576133 |
| Gdnf          | chr15:7761010-7787575     | 2.028773333 | 0.595202667 |
| Irf5          | chr6:29476624-29487320    | 2.027453333 | 4.721063333 |
| 1700086O06Rik | chr18:38398058-38410219   | 2.026333333 | 3.628043333 |
| Cd79b         | chr11:106172654-106175843 | 2.025133333 | 5.837306667 |
| Zfp960        | chr17:17201066-17226595   | 2.022116667 | 0.995328333 |
| Tceanc        | chrX:162937746-162948410  | 2.022093333 | 1.104373333 |
| Phyhip        | chr14:70857323-70868631   | 2.021788333 | 3.982996667 |
| Fbln1         | chr15:85036437-85116724   | 2.021374    | 0.925959967 |
| Gm11944       | chr11:3209002-3220725     | 2.021135333 | 1.827763333 |
| Frat1         | chr19:41904459-41907073   | 2.021018    | 1.100737867 |
| Zfp39         | chr11:58701654-58717727   | 2.019689667 | 4.439633333 |
| Slc12a4       | chr8:108467489-108490015  | 2.019328667 | 7.57539     |
| Zfp791        | chr8:87633065-87646994    | 2.016805667 | 2.019006333 |
| Al182371      | chr2:34937380-34956205    | 2.015806033 | 0.2778086   |
| B930003M22Rik | chr17:10512783-10514006   | 2.015431    | 0.285372833 |
| Gm2518        | chr19:8848974-8851452     | 2.014773667 | 0.997833333 |
| Rnf165        | chr18:77694848-77803875   | 2.01465     | 1.456158333 |
| Fzd8          | chr18:9212853-9216199     | 2.01429     | 1.625986667 |
| Mad2l1        | chr6:66485461-66490985    | 2.01414     | 3.89895     |
| Rnmtl1        | chr11:76057237-76064124   | 2.013676    | 2.135371667 |
| Lrp11         | chr10:7309597-7345275     | 2.012505333 | 11.45620667 |
| Lilrb4        | chr10:51210780-51216417   | 2.011466667 | 0.06975     |
| Tmem120a      | chr5:136211359-136220042  | 2.011196667 | 1.183354933 |
| Ankrd6        | chr4:32891009-33037801    | 2.011123333 | 2.048773667 |
| Sowahb        | chr5:93470148-93474048    | 2.01066     | 3.713368067 |
| Sox9          | chr11:112643523-112649071 | 2.00994     | 2.201992033 |
| Aldh3b1       | chr19:3913490-3929716     | 2.008829333 | 3.896749667 |
| Kbtbd12       | chr6:88563744-88577439    | 2.008069    | 0           |
| Nup107        | chr10:117187698-117229761 | 2.007716667 | 5.990136667 |
| Adamtsl4      | chr3:95480126-95491781    | 2.007676667 | 2.892415667 |
| 2310008H04Rik | chr16:15889319-16146926   | 2.006164333 | 3.264776667 |
| Gda           | chr19:21465796-21547151   | 2.005356667 | 4.182733333 |
| E130311K13Rik | chr3:63718617-63733307    | 2.004999    | 4.883663333 |
| Adap1         | chr5:139747829-139801418  | 2.004696333 | 0.988988667 |
| Mad1l1        | chr5:140484642-140797506  | 2.002660333 | 4.6181      |
| Eif2ak3       | chr6:70794520-70855234    | 2.002186    | 6.237096667 |
| Zfp13         | chr17:23712818-23736454   | 2.001706667 | 3.003066667 |
| Hexim2        | chr11:102994652-103001222 | 1.996033333 | 0.974533333 |
| Tnn           | chr1:162015162-162083706  | 1.993443    | 0.2628708   |
| Doc2a         | chr7:133991066-133996219  | 1.992127    | 0.420493    |
| Ush1g         | chr11:115176505-115183232 | 1.991576667 | 0.426917533 |
| 2310030N02Rik | chr4:10978194-11003351    | 1.990360667 | 6.680436667 |
| Pcdhb6        | chr18:37493681-37496000   | 1.989107    | 2.200113333 |
| Ckap2l        | chr2:129093945-129122948  | 1.988570333 | 5.909166667 |
| Gm16845       | chr9:21875445-21890575    | 1.987690667 | 2.1149176   |
| B3gnt1        | chr19:5038825-5041134     | 1.985752667 | 0.670660667 |
| Tmem53        | chr4:116924593-116941185  | 1.985344333 | 7.507653333 |
| Zfp551        | chr7:13000496-13007840    | 1.983346667 | 2.824771667 |
| BC066135      | chr2:180012350-180024584  | 1.982976667 | 1.225462667 |
| Acat3         | chr17:13116824-13133262   | 1.98256     | 1.046204333 |
| Mab21l3       | chr3:101616998-101640146  | 1.979063333 | 0.753759333 |

|               |                           |             |             |
|---------------|---------------------------|-------------|-------------|
| Serpina1c     | chr12:105133135-105143160 | 1.97444     | 0.5280178   |
| Pcdhb22       | chr18:37678006-37681073   | 1.974427333 | 4.03884     |
| Olf1r71       | chr4:43718499-43719438    | 1.97293     | 0           |
| Pla2g15       | chr8:108674298-108688615  | 1.9711502   | 2.476144333 |
| Gmppb         | chr9:107951620-107954267  | 1.971127667 | 3.961592333 |
| Cdr2          | chr7:128100549-128125826  | 1.970788267 | 5.70858     |
| C8a           | chr4:104488284-104549003  | 1.970221    | 0.008198867 |
| Ms4a7         | chr19:11395897-11410606   | 1.969996667 | 0           |
| Hspa12a       | chr19:58870240-58935474   | 1.969429    | 3.796483333 |
| Fam118a       | chr15:84867491-84893260   | 1.969272    | 1.515857333 |
| Zfp273        | chr13:67914752-67927937   | 1.967373    | 0.941566333 |
| Gp49a         | chr10:51200484-51206025   | 1.967183333 | 0.4104      |
| Steap2        | chr5:5664830-5694568      | 1.966520667 | 1.377345333 |
| Foxn1         | chr11:78171789-78200060   | 1.965857667 | 6.334115333 |
| Msl3l2        | chr10:55826722-55836686   | 1.965306667 | 1.038527667 |
| Tspan18       | chr2:93041916-93174644    | 1.965304333 | 0           |
| Gng3          | chr19:8911418-8913736     | 1.965064333 | 2.032172    |
| Tmem40        | chr6:115679156-115712484  | 1.963686667 | 11.39537683 |
| Adarb1        | chr10:76753471-76881018   | 1.962918667 | 4.38742     |
| D930015M05Rik | chr2:92249048-92272465    | 1.962099667 | 2.259336667 |
| Cep250        | chr2:155782293-155824636  | 1.961603333 | 3.570266667 |
| Trip10        | chr17:57388873-57403120   | 1.959246667 | 7.53906     |
| Asah2         | chr19:32059140-32177630   | 1.958136667 | 2.447306667 |
| Gm8348        | chr14:6973740-6994984     | 1.957606667 | 1.248858667 |
| Matn2         | chr15:34236435-34365995   | 1.957187667 | 1.338866667 |
| Gm10778       | chr10:81111813-81130106   | 1.954692667 | 1.045399333 |
| Ddx60         | chr8:64406885-64516492    | 1.954433333 | 1.50347     |
| Dnase1l3      | chr14:8797703-8826696     | 1.954188667 | 4.314589467 |
| Mark1         | chr1:186720302-186823428  | 1.95406     | 5.130906667 |
| Cd36          | chr5:17287507-17394777    | 1.953793333 | 1.088805333 |
| Avpr2         | chrX:71137440-71139766    | 1.953082667 | 4.69782     |
| Slc6a14       | chrX:21292025-21319483    | 1.95233     | 4.074284667 |
| Tcf19         | chr17:35649679-35653769   | 1.951878333 | 1.669437    |
| Cryab         | chr9:50560862-50564738    | 1.949162333 | 31.69117    |
| Pou5f2        | chr13:78164162-78165557   | 1.947203333 | 1.529163333 |
| Zranb3        | chr1:129850762-129998985  | 1.946788    | 0.847083167 |
| Rsph4a        | chr10:33624916-33635827   | 1.944778    | 9.27874     |
| Pcgf5         | chr19:36453556-36530694   | 1.944441    | 2.900876    |
| Runx1t1       | chr4:13670448-13820790    | 1.942912667 | 0.055387667 |
| Serpina1d     | chr12:105001796-105011843 | 1.942553333 | 0.4571843   |
| 2310042E22Rik | chr16:21152731-21154017   | 1.941963333 | 8.239193333 |
| 1700026J04Rik | chr13:35001832-35011861   | 1.941857    | 0.824019    |
| Zfp37         | chr4:61850576-61869580    | 1.941516667 | 4.499443333 |
| 2300005B03Rik | chr15:74573268-74577117   | 1.940068    | 22.04893333 |
| Tmem48        | chr4:107040388-107086943  | 1.939834667 | 1.086599    |
| Vill          | chr9:118961895-118980643  | 1.938716333 | 0.514916    |
| Man1a         | chr10:53625838-53795602   | 1.936833333 | 1.735516667 |
| C3            | chr17:57343395-57367559   | 1.935516667 | 4.22148     |
| 5830416I19Rik | chr5:64436211-64441465    | 1.93551     | 0           |
| Trim61        | chr8:67536874-67542587    | 1.934923667 | 0.9207425   |
| Duoxa1        | chr2:122129284-122139466  | 1.934103333 | 2.745920667 |
| Zfp560        | chr9:20149579-20189602    | 1.933646667 | 3.340309667 |

|               |                           |             |             |
|---------------|---------------------------|-------------|-------------|
| Slc25a15      | chr8:23486021-23509093    | 1.92858     | 3.83957     |
| Kcnp4         | chr5:48780741-49676898    | 1.928328333 | 0.275862267 |
| Srd5a1        | chr13:69712326-69750341   | 1.92737     | 6.695233333 |
| Cenpp         | chr13:49559427-49748100   | 1.926493333 | 1.617049    |
| Bmp4          | chr14:47003195-47010274   | 1.9225113   | 4.63975     |
| Zfp937        | chr2:150043834-150070610  | 1.921703333 | 1.959226667 |
| Il16          | chr7:90791572-90884000    | 1.920465333 | 0.058694467 |
| F420014N23Rik | chr10:126632304-126639699 | 1.920398    | 1.298867    |
| Cenpe         | chr3:134875526-134936504  | 1.920156333 | 3.59502     |
| Mex3a         | chr3:88336316-88345316    | 1.918736    | 10.90948333 |
| Tln2          | chr9:67064891-67407510    | 1.916896667 | 3.42232     |
| Ybx2          | chr11:69749400-69755101   | 1.913621333 | 5.336369667 |
| Cyp4f17       | chr17:32643406-32665839   | 1.912000333 | 1.477777833 |
| Btc           | chr5:91786286-91832020    | 1.908364333 | 1.454983    |
| Prr11         | chr11:86902657-86922216   | 1.907199    | 4.4068509   |
| Stmn1-rs1     | chr9:115190209-115191188  | 1.905108667 | 4.8463      |
| Fanca         | chr8:125792143-125842476  | 1.903485667 | 0.496951667 |
| 8430419L09Rik | chr6:135148004-135186258  | 1.902210333 | 6.706443333 |
| Pla2g7        | chr17:43705399-43749150   | 1.900696667 | 1.033466667 |
| Slc45a4       | chr15:73410720-73455174   | 1.900157333 | 0.2995266   |
| Fpgs          | chr2:32538128-32549695    | 1.898021    | 1.591400667 |
| Mest          | chr6:30683505-30698466    | 1.897924    | 6.2892396   |
| Pqlc2         | chr4:138853919-138866615  | 1.897686667 | 1.246053333 |
| Dzip1         | chr14:119274741-119322389 | 1.897144    | 1.642785367 |
| Wdr31         | chr4:62114767-62131906    | 1.896907333 | 3.815865333 |
| Ier5l         | chr2:30328160-30329719    | 1.89674     | 7.41126     |
| Utp23         | chr15:51708986-51716168   | 1.896723333 | 4.60776     |
| Fam136a       | chr6:86315676-86320052    | 1.895800333 | 0.756315    |
| Il11          | chr7:4723979-4729743      | 1.895428667 | 2.990908667 |
| Gsdma         | chr11:98525664-98539022   | 1.894063333 | 5.618887    |
| Leap2         | chr11:53235682-53236638   | 1.891543    | 2.08027     |
| Lrrc27        | chr7:146398886-146428872  | 1.888476667 | 0.770172333 |
| Tead2         | chr7:52471122-52488989    | 1.887923667 | 17.34669    |
| Dffb          | chr4:153338557-153349190  | 1.887286667 | 1.386573333 |
| Ubox5         | chr2:130415731-130455774  | 1.887153333 | 2.647525333 |
| Accs          | chr2:93675609-93689933    | 1.887011    | 1.690451333 |
| Etv5          | chr16:22381385-22439643   | 1.885532667 | 22.37613333 |
| Nckap5l       | chr15:99252464-99288179   | 1.885520333 | 16.65424333 |
| Fscn2         | chr11:120222847-120229487 | 1.885423    | 0.952886667 |
| Zfp783        | chr6:47893173-47904548    | 1.883183333 | 3.51815     |
| Parp16        | chr9:65062496-65087026    | 1.882089    | 2.811083333 |
| E130303B06Rik | chr8:108227551-108232068  | 1.882079333 | 4.724313333 |
| Shc4          | chr2:125453182-125549884  | 1.881542667 | 1.233796667 |
| 6430550D23Rik | chr2:155826178-155833713  | 1.881403333 | 0.385005333 |
| Mxra8         | chr4:155213788-155218211  | 1.88115     | 0.91831     |
| Otx1          | chr11:21894766-21901654   | 1.880451333 | 7.305826667 |
| Hoxc13        | chr15:102751561-102759245 | 1.880053333 | 2.1315288   |
| Pola1         | chrX:90550104-90877494    | 1.878953333 | 3.961436667 |
| Hist1h2ae     | chr13:23662385-23663089   | 1.876973333 | 2.063493333 |
| Pde5a         | chr3:122432075-122562292  | 1.87666     | 2.30272     |
| Lrrk1         | chr7:73403632-73533227    | 1.876257667 | 3.657429    |
| Gm10778       | chr10:81274930-81289235   | 1.875199    | 0.85702     |

|               |                           |             |             |
|---------------|---------------------------|-------------|-------------|
| 4930579G18Rik | chr14:55269347-55273937   | 1.874783333 | 1.792682667 |
| Six5          | chr7:19679892-19683694    | 1.873867333 | 2.699913333 |
| Dyrk2         | chr10:118296404-118305959 | 1.871695    | 13.56724    |
| Ncpg2         | chr12:117643874-117702004 | 1.86979     | 1.440327667 |
| Apol9a        | chr15:77234218-77241510   | 1.868516667 | 2.347695    |
| Ppp1r26       | chr2:28303460-28311028    | 1.86731     | 1.680307    |
| Nup62-il4i1   | chr7:52071739-52096173    | 1.86585     | 1.635256333 |
| Wtip          | chr7:34894566-34918287    | 1.865402467 | 3.329341667 |
| Trhr2         | chr8:124880866-124884646  | 1.865043333 | 0.506942    |
| Tead3         | chr17:28468617-28487750   | 1.864885667 | 2.267752667 |
| Zfp459        | chr13:67506649-67522354   | 1.860903    | 4.094159667 |
| Tle6          | chr10:81053649-81063645   | 1.859855467 | 0.031117467 |
| Glt25d2       | chr1:154246996-154357825  | 1.85922     | 3.5833458   |
| Pfkm          | chr15:97923019-97962878   | 1.858686333 | 4.26074     |
| Pms1          | chr1:53246031-53353840    | 1.85698     | 3.862163333 |
| Bambi         | chr18:3507954-3516402     | 1.856681333 | 2.000256667 |
| A330076C08Rik | chr13:44288957-44311856   | 1.856203    | 0.097569333 |
| 4930447A16Rik | chr15:37355308-37370399   | 1.855404667 | 0.596343333 |
| Bhlhe41       | chr6:145811256-145813860  | 1.854347    | 1.301356667 |
| Ctsll3        | chr13:60899610-60904205   | 1.853846667 | 0           |
| Nanos1        | chr19:60831889-60835817   | 1.85366     | 2.640946333 |
| Retsat        | chr6:72548621-72557482    | 1.852765333 | 5.91531     |
| Zfp251        | chr15:76682573-76701865   | 1.850528333 | 0.740467033 |
| Ppp4r1l-ps    | chr2:173404820-173485040  | 1.850492667 | 3.305273333 |
| Arid3c        | chr4:41670867-41678174    | 1.848886567 | 0           |
| Gm1943        | chr8:111863699-111864808  | 1.848733667 | 4.396737333 |
| 2810410L24Rik | chr11:120047963-120051170 | 1.84562     | 0.386184667 |
| Fmnl2         | chr2:52716901-52993236    | 1.84501     | 4.754393333 |
| Bmp6          | chr13:38437584-38591597   | 1.844360667 | 0.647654    |
| Ndn           | chr7:69493162-69494813    | 1.8443095   | 0.721123333 |
| G0s2          | chr1:195098353-195099382  | 1.843069667 | 2.179586667 |
| Chrn2         | chr3:89557369-89568554    | 1.8420976   | 4.754392333 |
| Wfdc12        | chr2:164014966-164016294  | 1.841623    | 2.026404    |
| 100043387     | chr2:176083704-176097171  | 1.841308333 | 1.13791838  |
| Nap1l5        | chr6:58855226-58857120    | 1.840144333 | 5.928023333 |
| Prr5          | chr15:84511427-84534103   | 1.840055333 | 4.182016667 |
| Fxyd4         | chr6:117883576-117887353  | 1.839833333 | 0.90998     |
| Csgalnact2    | chr6:118057470-118089158  | 1.837715333 | 1.170410333 |
| P2ry13        | chr3:59011813-59014804    | 1.836853333 | 0.558431333 |
| Tmem229b      | chr12:80062781-80108264   | 1.836619333 | 7.91023     |
| Aff2          | chrX:66613505-67121212    | 1.836087733 | 0           |
| BC037704      | chr19:43749667-43751660   | 1.83547     | 4.70658     |
| Phxr4         | chr9:13234580-13235960    | 1.834587333 | 1.491006333 |
| Calr3         | chr8:74948081-74967677    | 1.833743667 | 0.1401014   |
| Edn1          | chr13:42396638-42403358   | 1.833724667 | 0.874925667 |
| Xylb          | chr9:119266498-119302915  | 1.833092667 | 1.518496667 |
| Sned1         | chr1:95132473-95193025    | 1.829696667 | 2.458983333 |
| Gm6878        | chr14:67923724-67933548   | 1.828586333 | 0.042149667 |
| Ceacam19      | chr7:20461090-20473314    | 1.827760333 | 4.194793    |
| 1700113H08Rik | chr10:86520790-86693344   | 1.826653    | 0.067268167 |
| Lsm5          | chr6:56651056-56654693    | 1.825956667 | 1.313096667 |
| 1700001D01Rik | chr8:63760318-63767669    | 1.824112667 | 2.614130667 |

|               |                          |             |              |
|---------------|--------------------------|-------------|--------------|
| E130112N10Rik | chr6:125181293-125189952 | 1.822966667 | 1.99227      |
| Srcin1        | chr11:97370653-97436440  | 1.822893667 | 1.96829      |
| Hps1          | chr19:42829685-42854466  | 1.821172667 | 3.42852      |
| Col9a3        | chr2:180332926-180356890 | 1.819753333 | 2.921746667  |
| Bub1b         | chr2:118423946-118467328 | 1.819544333 | 1.429566333  |
| 1700102P08Rik | chr9:108295164-108300098 | 1.819062    | 2.293094667  |
| Epha2         | chr4:140857135-140885299 | 1.817840667 | 6.12401      |
| Trim75        | chr8:67505549-67511543   | 1.815983333 | 0            |
| Tmem150a      | chr6:72305476-72309756   | 1.815536667 | 5.26254      |
| Grb14         | chr2:64750539-64860823   | 1.814631333 | 5.352986667  |
| Efemp2        | chr19:5474689-5481854    | 1.813733333 | 2.126773333  |
| Dusp2         | chr2:127161894-127164113 | 1.81291     | 1.864670033  |
| Hsd11b2       | chr8:108042645-108047888 | 1.812291333 | 2.4132648    |
| Wwtr1         | chr3:57259565-57379832   | 1.812036333 | 2.63319      |
| Agpat2        | chr2:26449106-26459730   | 1.81055     | 7.863416667  |
| 0610010B08Rik | chr2:176266768-176598837 | 1.81029     | 0.901790667  |
| Nek8          | chr11:77979607-77990168  | 1.806839333 | 0.927616     |
| Acnat1        | chr4:49456403-49463981   | 1.802123333 | 0.108941933  |
| Gm14431       | chr2:175197962-175210780 | 1.801666667 | 1.815718     |
| Gm15997       | chr5:150291630-150340605 | 1.801096667 | 0.0262623    |
| Bok           | chr1:95582270-95592339   | 1.800877    | 3.051653333  |
| Mcm7          | chr5:138605816-138613090 | 1.79848     | 5.084896667  |
| Fam188b       | chr6:55153376-55270216   | 1.79827     | 3.357173333  |
| Creg2         | chr1:39675250-39708027   | 1.796461333 | 2.072199233  |
| Plk3          | chr4:116801259-116806557 | 1.794346667 | 3.74772      |
| Gm13308       | chr4:41812375-41813410   | 1.792744333 | 0.685137333  |
| Crocc         | chr4:140572551-140616460 | 1.791556667 | 1.536971     |
| 2310079F23Rik | chr5:35898857-35917719   | 1.790532667 | 3.95754      |
| Dok2          | chr14:71174187-71178301  | 1.789992    | 0.5570276    |
| Spc24         | chr9:21559885-21564730   | 1.788294033 | 1.084443167  |
| Slc25a26      | chr6:94450307-9454646    | 1.787083333 | 3.891086667  |
| Kif23         | chr9:61765084-61794606   | 1.786281667 | 2.593383333  |
| Gm7102        | chr19:61250588-61252212  | 1.786018    | 0.589846967  |
| A430105I19Rik | chr2:118579880-118588397 | 1.785760333 | 3.70359      |
| Tut1          | chr19:9028339-9040700    | 1.785484    | 2.45829      |
| Gm7008        | chr12:40949950-40955770  | 1.784398333 | 0.52897      |
| Rasgrf2       | chr13:92020011-92901449  | 1.783714667 | 0.2305854    |
| Dlx3          | chr11:94981430-94986605  | 1.783266667 | 12.677833333 |
| Cd46          | chr1:196868093-196918442 | 1.781333333 | 3.622385333  |
| Gm10814       | chr19:6012619-6018459    | 1.779049667 | 0            |
| Snx24         | chr18:53405315-53550479  | 1.778554667 | 1.608388     |
| Vav3          | chr3:109143600-109488612 | 1.778214667 | 6.699396667  |
| Gm8348        | chr14:3518337-3539580    | 1.778186667 | 1.138387667  |
| Slco2a1       | chr9:102910818-102990179 | 1.777756333 | 0.297171333  |
| Opn3          | chr1:177592558-177622721 | 1.776673333 | 2.841955667  |
| Arhgap30      | chr1:173319090-173340370 | 1.775874667 | 0.217165867  |
| Anxa9         | chr3:95100015-95111098   | 1.775701533 | 7.988297     |
| Atp2b4        | chr1:135599250-135650324 | 1.774116667 | 9.814446667  |
| Trim15        | chr17:36997635-37004155  | 1.774038333 | 0.457021333  |
| Plcb3         | chr19:7028202-7044242    | 1.770695667 | 8.841267667  |
| Tgtp2         | chr11:48870697-48877714  | 1.770399667 | 0            |
| Fam13a        | chr6:58883529-58974496   | 1.767613333 | 1.137735067  |



|               |                           |             |             |
|---------------|---------------------------|-------------|-------------|
| Sp140         | chr1:87497277-87541611    | 1.767273333 | 2.593827333 |
| Mlf1ip        | chr8:47637422-47664938    | 1.766888333 | 0.280174667 |
| Pdzd9         | chr7:127802809-127813857  | 1.766246    | 0.934499667 |
| P4htm         | chr9:108481156-108499931  | 1.765976667 | 6.197805333 |
| Entpd6        | chr2:150574816-150597410  | 1.763536667 | 2.3650642   |
| Hck           | chr2:152934203-152977177  | 1.76011     | 0.869934133 |
| Gm13939       | chr2:109742552-109753476  | 1.759602667 | 0.1132709   |
| B3gnt4        | chr5:123960468-123961891  | 1.758915401 | 0.554716667 |
| Paqr3         | chr5:97511347-97540615    | 1.757797    | 0.254015667 |
| Per2          | chr1:93312558-93355905    | 1.756803333 | 6.8888      |
| 3110062M04Rik | chr6:34821770-34828065    | 1.75515     | 1.92849     |
| Cd209c        | chr8:3940221-3946863      | 1.754743333 | 0.966699667 |
| Cd82          | chr2:93259268-93303103    | 1.753642    | 4.381522433 |
| Rhbd11        | chr17:25971409-25974072   | 1.752926667 | 9.129454    |
| Ldlrap1       | chr4:134301326-134323919  | 1.752003333 | 3.217856667 |
| Pfas          | chr11:68799202-68821962   | 1.751893333 | 2.829936    |
| Cmb1          | chr15:31498666-31519874   | 1.7508      | 1.879171333 |
| Zfp775        | chr6:48563178-48573226    | 1.749921667 | 1.600268    |
| Dcbl1         | chr10:51953424-52041183   | 1.749529667 | 0.697656667 |
| Adm2          | chr15:89153402-89155161   | 1.749081    | 0           |
| 2610039C10Rik | chr16:90719556-90727616   | 1.749038333 | 0.751247667 |
| Sulf2         | chr2:165899398-165981183  | 1.747436    | 1.395648    |
| Rhpn1         | chr15:75534717-75544849   | 1.746546367 | 4.33475     |
| 4930441O14Rik | chr13:67830198-67857775   | 1.745256667 | 1.509566333 |
| Gm16861       | chr16:4935163-4939585     | 1.743941    | 3.987788667 |
| BC017612      | chr9:15309938-15349703    | 1.743157667 | 7.961153333 |
| Slc24a5       | chr2:124893862-124914413  | 1.742053333 | 1.938491333 |
| Gm20337       | chr12:82043638-82046386   | 1.74164     | 0.197998933 |
| Vash2         | chr1:192771524-192803175  | 1.740946667 | 0.094831667 |
| Ddx28         | chr8:108533515-108535386  | 1.740466333 | 2.693683333 |
| Ehd3          | chr17:74154180-74181433   | 1.740202667 | 2.121160333 |
| Scrn2         | chr11:96891265-96895274   | 1.739586667 | 0.2772342   |
| 6030408B16Rik | chr15:101123642-101127857 | 1.739549333 | 0           |
| Agmo          | chr12:37968225-38308519   | 1.738434667 | 0.43316     |
| Tmem143       | chr7:53152438-53172783    | 1.738308667 | 4.865143667 |
| H2-Q1         | chr17:35457502-35462044   | 1.737966667 | 2.748423333 |
| 4833442J19Rik | chr6:149090034-149099692  | 1.737698    | 2.606526667 |
| Gm266         | chr12:112722819-112724034 | 1.737203333 | 0           |
| Stard13       | chr5:151840089-151992768  | 1.73534     | 0.916843333 |
| Gm8579        | chr6:3238518-3267019      | 1.73402     | 0           |
| Tmem79        | chr3:88132574-88138355    | 1.732825    | 17.2246     |
| Il20rb        | chr9:100358137-100386892  | 1.730276667 | 7.210973333 |
| Acsf2         | chr11:94418415-94463100   | 1.728568333 | 2.803853667 |
| Tmem136       | chr9:42916735-42924653    | 1.728191667 | 3.339923333 |
| Pofut1        | chr2:153067267-153095985  | 1.726614333 | 4.213386667 |
| Adam22        | chr5:8072351-8368081      | 1.724029333 | 2.552363333 |
| Mtfmt         | chr9:65283588-65300861    | 1.723899667 | 4.639845267 |
| Shb           | chr4:45436147-45543700    | 1.723156667 | 2.012752667 |
| Cks2          | chr13:51740600-51746031   | 1.717876667 | 2.570134333 |
| 4932416H05Rik | chr2:129624104-129627195  | 1.716871667 | 2.620464667 |
| Chrd1         | chrX:139720216-139828805  | 1.715514    | 1.176224333 |
| Serp1b8       | chr1:109486582-109505555  | 1.715434667 | 4.072266333 |

|               |                           |             |             |
|---------------|---------------------------|-------------|-------------|
| Cdca7l        | chr12:119082333-119117179 | 1.7152422   | 4.420568    |
| Mdga1         | chr17:29964902-30024827   | 1.71468     | 0.81003     |
| Elmo1         | chr13:20182375-20700222   | 1.713617667 | 1.929743333 |
| Stx1b         | chr7:134950357-134968045  | 1.713200333 | 2.540306    |
| Kiss1r        | chr10:79379715-79385017   | 1.712869    | 1.028585333 |
| Slc25a47      | chr12:110089338-110095025 | 1.712658667 | 0.2109918   |
| Slc2a12       | chr10:22364816-22423686   | 1.711261    | 0.851996667 |
| Gbp6          | chr5:105699720-105722718  | 1.711226    | 0.747502667 |
| Hist1h1t      | chr13:23787679-23788591   | 1.710190667 | 0.191732333 |
| Mettl13       | chr1:164463802-164478476  | 1.709890667 | 2.252081667 |
| Lyrn1         | chr7:127039805-127060264  | 1.709719667 | 1.945916    |
| 9430038I01Rik | chr7:144567251-144602439  | 1.708406667 | 1.827271    |
| Zfp689        | chr7:134585649-134592672  | 1.708376667 | 0.814761967 |
| Zfp777        | chr6:47974186-47998113    | 1.708357667 | 3.104973333 |
| A330049N07Rik | chr10:72436050-72549453   | 1.708131667 | 1.127686667 |
| Gm8898        | chr2:175690012-175702830  | 1.707033333 | 1.807310667 |
| B4galnt2      | chr11:95724872-95776185   | 1.706869333 | 0.608563333 |
| 1700025G04Rik | chr1:153731653-153937450  | 1.706376    | 6.541836667 |
| 2810468N07Rik | chr17:25707755-25711988   | 1.705956667 | 3.448231    |
| Tpmt          | chr13:47118911-47138586   | 1.70474     | 3.284602667 |
| Slc35e3       | chr10:117170733-117183414 | 1.703476    | 5.75226     |
| Gm14474       | chrX:10879557-10880047    | 1.701845333 | 0.034239333 |
| Phldb3        | chr7:25396346-25414316    | 1.701841    | 0.80383     |
| Gm5468        | chr15:25343946-25382173   | 1.7017223   | 0.088122333 |
| Msmg          | chr4:43596087-43597366    | 1.701573423 | 1.349852167 |
| Zfp444        | chr7:6124114-6144706      | 1.700776667 | 0.705151333 |
| Tmem86a       | chr7:54306009-54310146    | 1.700034333 | 2.64553     |
| Usp43         | chr11:67668024-67735655   | 1.699212    | 3.091423333 |
| Icam1         | chr9:20820403-20833240    | 1.698689    | 3.995523333 |
| A730056A06Rik | chr7:80458691-80520660    | 1.696256667 | 0.053260333 |
| 4930447K03Rik | chr13:34176023-34205141   | 1.695780333 | 0           |
| Rnf208        | chr2:25098448-25099781    | 1.694911    | 8.2198      |
| Gtpbp3        | chr8:74012001-74017299    | 1.693453333 | 3.0706      |
| Iqgap2        | chr13:96397131-96661877   | 1.689995333 | 2.142326967 |
| Tlcd2         | chr11:75281580-75284146   | 1.689792367 | 2.953186667 |
| Mtus2         | chr5:148768895-149127641  | 1.688823333 | 1.309998667 |
| Cdc6          | chr11:98769202-98785256   | 1.687746667 | 2.108556667 |
| Hist3h2bb-ps  | chr11:58767549-58768014   | 1.68592     | 1.033196667 |
| Notch1        | chr2:26313421-26359342    | 1.685593667 | 10.22816333 |
| 1700093K21Rik | chr11:23416202-23419942   | 1.685288333 | 0.169935333 |
| Fxyd1         | chr7:31836696-31840675    | 1.685011667 | 0           |
| 4831426I19Rik | chr12:106168158-106248019 | 1.683212667 | 5.269896667 |
| Gm5766        | chr16:4229228-4231205     | 1.682346667 | 1.831443333 |
| Gabrp         | chr11:33450780-33478957   | 1.682000333 | 26.06516667 |
| Cldn17        | chr16:88506051-88507223   | 1.681896667 | 1.578353333 |
| Kifc3         | chr8:97623727-97666440    | 1.681187    | 0.285224667 |
| Mybpc2        | chr7:51757068-51780039    | 1.680627333 | 1.555248667 |
| 6430573F11Rik | chr8:37552244-37576067    | 1.680036667 | 1.0989832   |
| Hist1h4m      | chr13:21903614-21904019   | 1.679946821 | 0.807347651 |
| Duox1         | chr2:122141407-122173708  | 1.678703333 | 3.156501333 |
| Plekha7       | chr7:123267631-123333355  | 1.678199    | 2.975976667 |
| Fam111a       | chr19:12648014-12664186   | 1.678130667 | 2.340383333 |

|               |                           |             |             |
|---------------|---------------------------|-------------|-------------|
| Esyt3         | chr9:99210385-99258949    | 1.67796     | 1.40063     |
| Wasf1         | chr10:40603339-40658375   | 1.675881    | 2.518513667 |
| Sgcz          | chr8:38585607-39724562    | 1.675483333 | 0           |
| Cdnf          | chr2:3430336-3443648      | 1.673693333 | 1.137952667 |
| Cited4        | chr4:120339167-120340425  | 1.673601333 | 4.19616     |
| Zfp324        | chr7:13551212-13559171    | 1.672902    | 1.560886667 |
| Asap1         | chr15:63920100-64214481   | 1.671923    | 5.670666667 |
| Slc7a3        | chrX:98274559-98280691    | 1.671653333 | 0.631343    |
| Gpatch3       | chr4:133130659-133140157  | 1.671539    | 2.884827233 |
| Mpp4          | chr1:59177778-59220233    | 1.670335    | 0.087364333 |
| Serpinb3c     | chr1:109167777-109174948  | 1.669586    | 4.58697     |
| Zfp953        | chr13:67440244-67461508   | 1.668796667 | 2.953068667 |
| Gm10768       | chr19:43913292-43915335   | 1.66858     | 2.660706667 |
| Ulk4          | chr9:120873571-121186290  | 1.667903333 | 3.212716667 |
| Aph1a         | chr3:95697918-95702213    | 1.667683    | 4.2899      |
| C030037D09Rik | chr11:88579956-88589886   | 1.667606333 | 0.424344667 |
| Zc3hc1        | chr6:30316387-30341010    | 1.6669      | 0.803511333 |
| Mns1          | chr9:72286335-72306383    | 1.665998    | 2.580033333 |
| Skp2          | chr15:9041741-9070207     | 1.663833333 | 5.348053333 |
| Olfra460      | chr6:40521386-40522331    | 1.663473333 | 0           |
| Zfp101        | chr17:33517123-33531582   | 1.661848333 | 1.384150667 |
| Lce3b         | chr3:92736900-92738018    | 1.659314667 | 6.538303333 |
| Arsa          | chr15:89302906-89307855   | 1.658862667 | 0.3435265   |
| D630029K05Rik | chr10:116401795-116406163 | 1.658086667 | 0.890156667 |
| Ninl          | chr2:150760254-150835134  | 1.657736667 | 2.432816667 |
| Tgm5          | chr2:120871846-120911495  | 1.657329333 | 21.72373333 |
| Gm14482       | chrX:10892214-10892723    | 1.657031667 | 0.0648469   |
| Nat1          | chr8:70014656-70016002    | 1.656545    | 0.148344    |
| Thg1l         | chr11:45761655-45768996   | 1.654959333 | 3.55156     |
| Spata2l       | chr8:125756157-125760109  | 1.65481     | 9.252983333 |
| Map2k6        | chr11:110260435-110374951 | 1.65326     | 8.231095667 |
| 3110009E18Rik | chr1:122017763-122084766  | 1.653183333 | 2.77593     |
| 100043387     | chr2:176493061-176506522  | 1.652843    | 1.164487362 |
| Ranbp17       | chr11:33111793-33413746   | 1.651692667 | 2.374387667 |
| 2310020H05Rik | chr13:99846482-99857876   | 1.649064333 | 0           |
| Gm9054        | chr3:95789432-95790890    | 1.647957667 | 0           |
| A430088P11Rik | chr15:80521454-80528040   | 1.647555333 | 6.122594833 |
| Ccdc106       | chr7:5008327-5012386      | 1.646878333 | 0.245580667 |
| Zfp874b       | chr13:67572448-67585189   | 1.646169333 | 0.942771667 |
| Lpin3         | chr2:160706405-160731736  | 1.645896667 | 2.184579667 |
| Mxd3          | chr13:55426528-55431091   | 1.645806667 | 0.674684333 |
| 4930572J05Rik | chr15:74551663-74554803   | 1.645055067 | 3.706933667 |
| 2010308F09Rik | chrX:12811766-12824859    | 1.644439333 | 1.04967     |
| Vav2          | chr2:27119154-27282345    | 1.643863    | 0.724293667 |
| Gpd1          | chr15:99548023-99555438   | 1.643391333 | 12.28729667 |
| Myl7          | chr11:5796639-5798785     | 1.642992667 | 0           |
| Chst8         | chr7:35459486-35597730    | 1.64225     | 5.905543    |
| C230081A13Rik | chr9:56048935-56265857    | 1.641936667 | 3.489918333 |
| A230056P14Rik | chr7:63217900-63235466    | 1.641010333 | 0.596181333 |
| Mapt          | chr11:104092749-104193407 | 1.641003333 | 8.894626667 |
| LOC330599     | chr7:105325703-105333309  | 1.640663333 | 1.208007667 |
| 3010001F23Rik | chrX:148803114-148851245  | 1.640636667 | 1.499251667 |

|               |                           |             |             |
|---------------|---------------------------|-------------|-------------|
| Shisa7        | chr7:4777153-4796298      | 1.640327    | 4.247296667 |
| Gm2011        | chr3:40650920-40679531    | 1.639853667 | 6.860313333 |
| Top3a         | chr11:60553560-60590867   | 1.639738667 | 1.693730933 |
| Zfp429        | chr13:67490264-67500703   | 1.639365    | 0.598495333 |
| 6720463M24Rik | chr14:99445595-99473326   | 1.638957333 | 2.780716667 |
| Ccdc30        | chr4:118996443-119088126  | 1.637693667 | 1.984064333 |
| Yy2           | chrX:154004050-154006917  | 1.637634    | 0.661323333 |
| Gm14634       | chrX:12339403-12398618    | 1.636816667 | 0.0193421   |
| Ptpru         | chr4:131324371-131394193  | 1.636237333 | 5.500736667 |
| Pyroxd2       | chr19:42800347-42827265   | 1.6358      | 1.582603667 |
| Tmem163       | chr1:129386918-129574598  | 1.633592    | 2.563403333 |
| Tuba8         | chr6:121160787-121176115  | 1.632987333 | 6.653446667 |
| Il17rd        | chr14:27852186-27920472   | 1.630153333 | 0.436779967 |
| Wif1          | chr10:120471059-120537698 | 1.629799667 | 1.011263333 |
| 2610020C07Rik | chr16:11203475-11225889   | 1.629066667 | 2.190961667 |
| Abca8b        | chr11:109794719-109857130 | 1.628516667 | 0.050723667 |
| Dgat2         | chr7:106302172-106331223  | 1.628144333 | 11.9683     |
| Ltbp1         | chr17:75404868-75792307   | 1.624450667 | 8.35287     |
| Spred1        | chr2:116947185-117005072  | 1.623311    | 5.763283333 |
| Gcnt1         | chr19:17400630-17447334   | 1.621949    | 3.15507     |
| N4bp211       | chr5:151374217-151397100  | 1.619608667 | 1.219776667 |
| Top1mt        | chr15:75487462-75509220   | 1.619406667 | 0.911946    |
| Fbxo24        | chr5:138053732-138066306  | 1.6193      | 0.589835    |
| Zfp759        | chr13:67229163-67242723   | 1.618890333 | 1.800423333 |
| Tulp2         | chr7:52769075-52777973    | 1.618686933 | 0.367487667 |
| Spata24       | chr18:35816342-35821840   | 1.61853     | 1.823537667 |
| Tradd         | chr8:107782474-107788494  | 1.61745     | 6.09062     |
| Gsdmc         | chr15:63607525-63640294   | 1.617063333 | 2.629136667 |
| Chmp6         | chr11:119775123-119780866 | 1.615983    | 3.461497333 |
| Zbtb45        | chr7:13591014-13595149    | 1.615975667 | 2.570222333 |
| Hoxa2         | chr6:52112509-52114830    | 1.615046667 | 0.019092233 |
| Pcdhb21       | chr18:37673305-37676017   | 1.614228    | 2.047178667 |
| Fancg         | chr4:43015208-43023173    | 1.61296     | 9.749029333 |
| Mlf1          | chr3:67178018-67203922    | 1.612818667 | 5.700694333 |
| Zfp174        | chr16:3847222-3858880     | 1.611926333 | 2.314086667 |
| AU022252      | chr4:118897742-118905329  | 1.611004333 | 5.481823333 |
| Zfp764        | chr7:134547181-134550336  | 1.60896     | 8.212916667 |
| Wnt4          | chr4:136833549-136855416  | 1.606476    | 18.97904    |
| Gm15787       | chr5:110596526-110605523  | 1.604689333 | 6.795471667 |
| Lhfp11        | chrX:141724901-141783437  | 1.603787667 | 5.021166667 |
| Gm10248       | chr14:23857416-23913793   | 1.603064    | 0.499997167 |
| Zdhhc23       | chr16:43969258-43979163   | 1.60289     | 4.60266     |
| Tdg           | chr10:82092582-82113239   | 1.602773333 | 2.160048667 |
| Tsku          | chr7:105499177-105509838  | 1.601326    | 2.88337     |
| Rab30         | chr7:99890223-99985627    | 1.600107667 | 0.511471667 |
| Sec22a        | chr16:35311216-35364004   | 1.599434    | 1.180953    |
| 8430403D17Rik | chr11:85515701-85533246   | 1.598410667 | 1.76536     |
| 2310061N02Rik | chr16:88707415-88708207   | 1.59737     | 10.21847167 |
| Spred3        | chr7:29943847-29953666    | 1.596458333 | 5.003173333 |
| Rgs20         | chr1:4899656-5060366      | 1.595919667 | 3.30759     |
| Arg2          | chr12:80231774-80257288   | 1.595823333 | 2.70462     |
| Med18         | chr4:132014643-132019836  | 1.595226667 | 7.373296667 |

|               |                           |             |             |
|---------------|---------------------------|-------------|-------------|
| 4930487H11Rik | chr1:62837491-62841306    | 1.59371     | 0.368645667 |
| Tead4         | chr6:128177160-128250831  | 1.590808    | 0.173305667 |
| Elac1         | chr18:73894691-73914133   | 1.58955     | 3.803183333 |
| Oxtr          | chr6:112423677-112439802  | 1.586982333 | 0.594303333 |
| Ssxb8         | chrX:8262456-8267970      | 1.58683     | 1.019563333 |
| Bri3bp        | chr5:125921937-125941255  | 1.585456667 | 2.004003333 |
| Phactr3       | chr2:177853679-178073197  | 1.584990667 | 1.234216333 |
| Enox          | chrX:100688914-100701764  | 1.583163333 | 4.444306667 |
| Asap3         | chr4:135762279-135802488  | 1.581237533 | 1.861516    |
| Prc1          | chr7:87439350-87461145    | 1.580556667 | 3.208415    |
| Sh2b2         | chr5:136694018-136720773  | 1.580235    | 1.768868333 |
| Acss2         | chr2:155343778-155388479  | 1.578386667 | 3.077364    |
| Bdkrb2        | chr12:106801381-106831281 | 1.577182733 | 0.742715    |
| Fam20c        | chr5:139231034-139286017  | 1.5725776   | 1.901446667 |
| 5430401F13Rik | chr6:131493779-131503775  | 1.572468    | 0           |
| 1190003J15Rik | chr7:148021394-148023867  | 1.572436667 | 5.894553333 |
| Chpf          | chr1:75471143-75476046    | 1.572020333 | 3.879553333 |
| Sox6          | chr7:122614857-123182258  | 1.571925667 | 3.231846667 |
| Atp6v1e2      | chr17:87343448-87347227   | 1.571773333 | 0           |
| Rnf24         | chr2:131124223-131178628  | 1.571373333 | 5.565536667 |
| Fbxl15        | chr19:46402673-46404936   | 1.570346333 | 2.142670333 |
| Tmem28        | chrX:97016407-97041684    | 1.569290333 | 1.3087693   |
| Prss30        | chr17:24109093-24112197   | 1.568994    | 0.101438667 |
| Trpv6         | chr6:41570617-41586404    | 1.568888333 | 4.13386     |
| Ctsw          | chr19:5465239-5468498     | 1.567124333 | 0           |
| Pcdh7         | chr5:58109259-58523479    | 1.56422     | 6.544183333 |
| Ggn           | chr7:29955228-29958952    | 1.562849333 | 3.089235    |
| Epm2a         | chr10:11063242-11177275   | 1.56255     | 3.140925    |
| Serpina1a     | chr12:105091504-105101829 | 1.562483333 | 0.4233673   |
| Ttyh2         | chr11:114536781-114582298 | 1.561733333 | 0.173872333 |
| 4930563E18Rik | chr18:10706857-10711830   | 1.559124    | 0           |
| Plce1         | chr19:38598686-38859590   | 1.558857333 | 1.302578667 |
| S100a3        | chr3:90404136-90406624    | 1.557416667 | 0           |
| Slc30a2       | chr4:133898960-133910399  | 1.557084333 | 0.814298333 |
| Moxd1         | chr10:23943322-24022589   | 1.55657     | 5.787355333 |
| Mr1           | chr1:156975007-156993910  | 1.556123333 | 9.857523333 |
| Plscr5        | chr9:92087773-92104536    | 1.556102667 | 0           |
| L3mbtl1       | chr2:162769200-162800258  | 1.555873333 | 0.346643333 |
| Emid1         | chr11:5006268-5052225     | 1.555684    | 0           |
| Enkur         | chr2:21102357-21126992    | 1.554924    | 4.281323333 |
| Guca1b        | chr17:47522341-47529916   | 1.55479     | 0.674186667 |
| Jam2          | chr16:84774367-84826620   | 1.554783333 | 1.835743333 |
| Sla2          | chr2:156698657-156712814  | 1.554152333 | 0.324251333 |
| Foxo4         | chrX:98449866-98456212    | 1.553438    | 4.154939667 |
| Fgfr3         | chr5:34064372-34079717    | 1.553380367 | 4.75443     |
| Clca4         | chr3:144485586-144512266  | 1.552292    | 12.00449333 |
| Cep70         | chr9:99143886-99200822    | 1.552085667 | 5.077446667 |
| Kcnmb3        | chr3:32371242-32390891    | 1.550264333 | 0.693786667 |
| Aldh1a3       | chr7:73535778-73572363    | 1.548743333 | 1.393062    |
| 4921525B02Rik | chr14:104092199-104098649 | 1.548013    | 2.34266     |
| Pcyox1l       | chr18:61856490-61867289   | 1.546732667 | 5.088044    |
| Akr1b3        | chr6:34253929-34267489    | 1.546542598 | 0.917610763 |

|               |                           |             |             |
|---------------|---------------------------|-------------|-------------|
| A330050B17Rik | chr3:35898834-35907750    | 1.54578     | 0.172492    |
| Kalrn         | chr16:33969158-34514113   | 1.545236667 | 5.5616      |
| Slc16a7       | chr10:124664540-124765591 | 1.543902333 | 3.52422     |
| Atl1          | chr12:70994091-71065072   | 1.543816333 | 3.838616667 |
| 4930512B01Rik | chr12:70891330-70942867   | 1.54302     | 2.593984333 |
| Khdrbs3       | chr15:68758849-68923948   | 1.540754    | 4.42197     |
| 4933416M07Rik | chr8:28253381-28260178    | 1.540235    | 0.293212467 |
| Dock8         | chr19:25074018-25276922   | 1.539270333 | 5.6724      |
| 0610040B10Rik | chr5:144090986-144094383  | 1.538256667 | 0           |
| Pwp2          | chr10:77633654-77647894   | 1.534340667 | 0.793804667 |
| Hsd17b14      | chr7:52810297-52822691    | 1.532198667 | 0.500252667 |
| Gm19557       | chr19:47587471-47591068   | 1.531448333 | 0.414933    |
| Dbn1          | chr13:55574788-55589437   | 1.531420667 | 9.54181     |
| Oplah         | chr15:76127032-76137675   | 1.531407667 | 0.355531333 |
| 5031439G07Rik | chr15:84776149-84818401   | 1.530335333 | 7.180856667 |
| Stil          | chr4:114672722-114715803  | 1.529491333 | 4.843896667 |
| Rpusd2        | chr2:118860525-118867933  | 1.529248    | 2.574116667 |
| Hdc           | chr2:126419403-126444401  | 1.526220667 | 4.689066667 |
| Prkd1         | chr12:51442218-51750210   | 1.526205767 | 0.756888    |
| Il4i1         | chr7:52091657-52096179    | 1.525357333 | 0.279175652 |
| A630089N07Rik | chr16:98283676-98303604   | 1.524377333 | 1.648583333 |
| Gm17296       | chr8:128950551-128998965  | 1.524203333 | 1.32968     |
| Mrgpre        | chr7:150964267-150970405  | 1.522955667 | 3.315653333 |
| Gm4890        | chr8:81818976-81831673    | 1.522526667 | 0.632674    |
| A430110N23Rik | chr7:4877445-4896399      | 1.520206    | 0.409211667 |
| Zfp14         | chr7:30821377-30836415    | 1.51964     | 1.492517667 |
| 1520402A15Rik | chr4:115809332-115817221  | 1.51939     | 1.582126333 |
| Gsta3         | chr1:21230669-21255640    | 1.519156    | 7.5392      |
| Slnf5         | chr11:82765603-82778352   | 1.518953333 | 0.0522744   |
| Gp2           | chr7:126586057-126602786  | 1.518263333 | 11.07750667 |
| Il3ra         | chr14:15179008-15188004   | 1.517138333 | 0           |
| 4930473A02Rik | chr2:130369526-130389485  | 1.516567    | 1.538990667 |
| Olfr992       | chr2:85239758-85240688    | 1.516203333 | 0           |
| 1810041L15Rik | chr15:84209632-84277527   | 1.513805267 | 2.167231667 |
| A130049A11Rik | chr3:103768458-103772239  | 1.513763333 | 1.304262    |
| Usp28         | chr9:48793489-48850622    | 1.513377333 | 3.92972     |
| Dck           | chr5:89194037-89212302    | 1.512742    | 5.312028667 |
| Fam71f2       | chr6:29231140-29240676    | 1.511815333 | 0.440723333 |
| Gm14436       | chr2:176131456-176144719  | 1.511643333 | 0.826602667 |
| Poll          | chr19:45626765-45635033   | 1.511120333 | 12.08693    |
| Gm14393       | chr2:174887049-174893264  | 1.510323333 | 0.590482333 |
| Cpxm2         | chr7:139234492-139346424  | 1.510043    | 0.943750667 |
| Slc43a3       | chr2:84776802-84798666    | 1.50925     | 7.443366667 |
| Zfp575        | chr7:25368856-25372660    | 1.508542667 | 0.124334767 |
| Pde8b         | chr13:95794059-96020259   | 1.507709333 | 1.980663333 |
| 1700001L19Rik | chr13:68736315-68753108   | 1.507143333 | 0.122018    |
| Lass4         | chr8:4493404-4526079      | 1.506351667 | 11.65628333 |
| AI467606      | chr7:134234949-134237563  | 1.505991667 | 3.949487    |
| 9530080O11Rik | chr4:95626401-95634346    | 1.504060333 | 1.081588333 |
| D330028D13Rik | chr6:49317737-49339903    | 1.502142    | 6.447413333 |
| Ccdc126       | chr6:49269351-49291580    | 1.501560333 | 1.255790333 |
| Gm10785       | chr16:91689142-91716000   | 1.49982     | 0.249803033 |

|               |                           |             |             |
|---------------|---------------------------|-------------|-------------|
| Plb1          | chr5:32535080-32666729    | 1.499666667 | 1.466766667 |
| Nfkbie        | chr17:45692664-45700117   | 1.499297    | 1.403873133 |
| Fam109a       | chr5:122299036-122304608  | 1.497918    | 3.290297    |
| Ccrl2         | chr9:110957338-110959774  | 1.497686667 | 1.458391    |
| C130083M11Rik | chr5:52591222-52607672    | 1.49673     | 1.950608333 |
| Gprin3        | chr6:59302454-59376284    | 1.496312    | 0           |
| Plcd1         | chr9:118980645-119002614  | 1.495797333 | 5.337961    |
| Erc8          | chr13:108948931-108985175 | 1.49465     | 4.122403333 |
| Fgl2          | chr5:20878490-20884204    | 1.4944466   | 0.562555667 |
| Chsy1         | chr7:73254400-73318684    | 1.494069667 | 2.651113333 |
| Tbc1d4        | chr14:101841576-102008408 | 1.492267333 | 1.359722667 |
| Magee1        | chrX:102315734-102319250  | 1.491998667 | 4.59499     |
| BC065397      | chrX:133277495-133337900  | 1.491797333 | 2.226493333 |
| Sfxn2         | chr19:46647854-46671390   | 1.490813333 | 2.65937     |
| B3galt6       | chr4:155363574-155366787  | 1.49055     | 3.152323333 |
| D630045J12Rik | chr6:38073173-38204009    | 1.490047667 | 9.00919     |
| Zfp771        | chr7:134388039-134398315  | 1.490035667 | 0.324694667 |
| Kcng3         | chr17:83985296-84031235   | 1.489614667 | 19.42706667 |
| Hyal2         | chr9:107471493-107475109  | 1.489157667 | 0.924543333 |
| Spryd4        | chr10:127646965-127648850 | 1.488724    | 5.394330333 |
| Oas1h         | chr5:121311430-121323514  | 1.488272667 | 1.78559     |
| Lrrc29        | chr8:107836239-107850176  | 1.487632333 | 1.3573913   |
| AA415398      | chr4:119202922-119211374  | 1.48697     | 1.930643333 |
| Prrt1         | chr17:34766630-34769205   | 1.486345667 | 3.575338667 |
| Ube2j2        | chr4:155317939-155333713  | 1.485036667 | 1.855888333 |
| Rec8          | chr14:56237002-56244232   | 1.483925467 | 0.860113333 |
| 1810012K16Rik | chr8:23509192-23510063    | 1.483821667 | 0           |
| Lipt2         | chr7:107307786-107309441  | 1.483393333 | 6.698756667 |
| Tprg          | chr16:25286902-25422430   | 1.482481333 | 5.324338667 |
| Tspan9        | chr6:127911417-128093596  | 1.480303    | 6.92142     |
| Spin2         | chrX:150266835-150268783  | 1.479636667 | 6.727803333 |
| Nptxr         | chr15:79616780-79635139   | 1.478523    | 0.624625667 |
| Barx2         | chr9:31653628-31720870    | 1.477786667 | 12.65583333 |
| Serpnb9f      | chr13:33415945-33427235   | 1.476830333 | 4.36389     |
| 1810044D09Rik | chr6:91390980-91391749    | 1.47378     | 5.398233333 |
| Snx10         | chr6:51473901-51540669    | 1.472221    | 2.930414333 |
| 4930583H14Rik | chr3:51192334-51200469    | 1.47185     | 12.91113    |
| Gm20554       | chr13:72760913-72766012   | 1.47123     | 1.831673333 |
| Gm11696       | chr11:109216091-109224968 | 1.46932     | 1.107213333 |
| Ftsj2         | chr5:140803627-140807852  | 1.467308033 | 0.518413333 |
| Gm10653       | chr9:62689283-62709831    | 1.467053333 | 3.62102     |
| Col9a2        | chr4:120712170-120727930  | 1.466074667 | 0.159169333 |
| Upk3a         | chr15:84847570-84852990   | 1.465503333 | 2.10353     |
| Stk32a        | chr18:43367350-43477135   | 1.463378    | 0.009461767 |
| Dnahc8        | chr17:30763880-31012209   | 1.458455667 | 2.123257667 |
| Rnf133        | chr6:23598868-23600305    | 1.458444667 | 7.15611     |
| Gm10069       | chr6:128388774-128453299  | 1.458114333 | 1.129743333 |
| 4930563E22Rik | chr11:72028639-72031952   | 1.458024667 | 1.619002    |
| Tcam1         | chr11:106137985-106149457 | 1.455546    | 0           |
| Abo           | chr2:26698022-26720499    | 1.455423333 | 0.244177333 |
| Gabre         | chrX:69502770-69520060    | 1.454516667 | 0.087042333 |
| Piwil4        | chr9:14506801-14545177    | 1.453632667 | 0.168733    |

|               |                           |             |             |
|---------------|---------------------------|-------------|-------------|
| Agrp          | chr8:108090597-108092198  | 1.453502333 | 0           |
| Kif19a        | chr11:114626702-114651889 | 1.452554333 | 7.622936233 |
| Zfp28         | chr7:6336027-6349347      | 1.452241667 | 3.471253333 |
| Bglap         | chr3:88187416-88188386    | 1.451307333 | 188.9543333 |
| Car5b         | chrX:160414753-160465942  | 1.449715    | 1.090751    |
| Card14        | chr11:119176100-119206689 | 1.449656667 | 0.560452767 |
| Vmn2r25       | chr6:123772831-123803208  | 1.449143667 | 0           |
| 1700015E13Rik | chr1:172238991-172242256  | 1.448911667 | 0.301391667 |
| Dus4l         | chr12:32324919-32339691   | 1.448757    | 1.644594667 |
| Slc16a10      | chr10:39753340-39862060   | 1.448542667 | 6.150146667 |
| Gm14436       | chr2:175295560-175308823  | 1.44838     | 0.822632667 |
| Olfr1381      | chr11:49365250-49366186   | 1.447325    | 0.640867667 |
| 2310079G19Rik | chr16:88627032-88627911   | 1.447016667 | 6.2398      |
| Tm6sf2        | chr8:72596830-72603951    | 1.446961    | 0.199799333 |
| Maml2         | chr9:13424432-13513977    | 1.445418    | 6.138303333 |
| Orc1          | chr4:108252058-108287436  | 1.444732    | 0.142606533 |
| 4930529M08Rik | chr2:145760519-145789962  | 1.443768233 | 0.020788467 |
| 1810062G17Rik | chr3:36374858-36381221    | 1.443743667 | 0.040073333 |
| 6530401N04Rik | chr12:53098493-53107488   | 1.443606    | 2.28697     |
| Mybl1         | chr1:9658915-9690290      | 1.443603333 | 4.71928     |
| Kcnk5         | chr14:20959279-21001004   | 1.44248     | 15.70872333 |
| Trim34b       | chr7:111477984-111485131  | 1.441359667 | 0.804721667 |
| Pnma1         | chr12:85487080-85489439   | 1.439552667 | 2.263418    |
| Dok1          | chr6:82980929-82983465    | 1.438450667 | 1.786105333 |
| Nod1          | chr6:54873935-54922606    | 1.434821667 | 2.533188667 |
| Pld1          | chr3:27837601-28032284    | 1.434672333 | 1.906076    |
| Hoga1         | chr19:42120340-42145429   | 1.434236667 | 0.019708667 |
| Btbd8         | chr5:107867015-107920615  | 1.434115333 | 0.431596    |
| Arhgap31      | chr16:38598455-38713148   | 1.433763333 | 1.577241333 |
| Cntln         | chr4:84530230-84777822    | 1.433130333 | 2.233646667 |
| Fhod1         | chr8:107853059-107871870  | 1.43297     | 0.592657    |
| D330050I16Rik | chr19:5388335-5390069     | 1.431362867 | 5.146656667 |
| Heyl          | chr4:122910798-122927113  | 1.429042333 | 0.381743333 |
| Zfp2          | chr11:50712213-50729663   | 1.429030667 | 4.548794667 |
| Slc45a2       | chr15:10930475-10958988   | 1.428925233 | 0           |
| Prkar2b       | chr12:32643343-32746144   | 1.428742733 | 1.435023333 |
| Pvt1          | chr15:61869541-62082530   | 1.428609667 | 0.029723667 |
| 4930470H14Rik | chr17:4044657-4082995     | 1.428178667 | 0.389538667 |
| 2310007B03Rik | chr1:95047931-95057525    | 1.422956667 | 1.560983    |
| Abt1          | chr13:23510229-23515735   | 1.420777    | 1.168121333 |
| Zfp382        | chr7:30906966-30920051    | 1.419761    | 1.562493333 |
| Dkk3          | chr7:119259532-119302571  | 1.418575333 | 6.904313333 |
| Mab21l1       | chr3:55586431-55589209    | 1.418434    | 0.463095333 |
| 1700109H08Rik | chr5:3571715-3584341      | 1.415688    | 1.647037333 |
| Tbc1d24       | chr17:24312375-24342507   | 1.41538     | 4.57025     |
| Ccna2         | chr3:36463786-36470918    | 1.415193333 | 1.527638333 |
| 4931440F15Rik | chr11:29722394-29725668   | 1.414723    | 0.225855333 |
| Blm           | chr7:87599878-87680005    | 1.413626667 | 1.646963    |
| 1700123O21Rik | chr16:5975679-5998589     | 1.412033333 | 0           |
| Gm8580        | chr10:93127988-93128599   | 1.411797    | 1.5388061   |
| Bcl2a1b       | chr9:89094110-89102676    | 1.411146667 | 0           |
| Kif26b        | chr1:180459255-180862988  | 1.411080667 | 1.095457    |



|               |                           |             |             |
|---------------|---------------------------|-------------|-------------|
| Spock2        | chr10:59569004-59596661   | 1.4107595   | 0.354066667 |
| Rwdd2b        | chr16:87433575-87440837   | 1.409182667 | 3.172183    |
| 6330407J23Rik | chr10:28863801-28919434   | 1.408967    | 0.061617333 |
| Exog          | chr9:119354040-119374636  | 1.408915667 | 1.861040333 |
| Dock6         | chr9:21604623-21657079    | 1.40888     | 2.152326667 |
| Gucy2e        | chr11:69031618-69050524   | 1.408293333 | 0.455165667 |
| Tmem110       | chr14:31638779-31690396   | 1.407619333 | 2.282165667 |
| Tcp10a        | chr17:13254056-13569627   | 1.407432    | 0.892747667 |
| Tmem97        | chr11:78355318-78364237   | 1.405818    | 10.61733333 |
| Tekt4         | chr17:25608534-25613539   | 1.403983667 | 1.871847133 |
| Cbln4         | chr2:171861835-171868966  | 1.40367     | 4.86854     |
| 1700022P22Rik | chr1:192860700-192866820  | 1.403563333 | 0           |
| Slc22a15      | chr3:101659693-101728376  | 1.402825333 | 3.583706667 |
| Gm14431       | chr2:175917414-175930232  | 1.402508333 | 0.410854333 |
| G630025P09Rik | chr11:69617170-69619540   | 1.401571333 | 0.564005699 |
| Alms1-ps2     | chr6:85742110-85754051    | 1.400583333 | 0.795273667 |
| Apex2         | chrX:147006049-147022692  | 1.399346667 | 1.069557667 |
| 4930412C18Rik | chr4:9697731-9750558      | 1.399059    | 0.445432333 |
| Snai2         | chr16:14705951-14709475   | 1.398885    | 1.534403333 |
| 4931408A02Rik | chr16:90831103-90905130   | 1.398843667 | 0.946394333 |
| Chpf2         | chr5:24092567-24098304    | 1.397712    | 1.149927    |
| Noxo1         | chr17:24833178-24837474   | 1.397196667 | 2.118029667 |
| 4933409K07Rik | chr4:42452732-42476567    | 1.396256667 | 0.189152667 |
| Serpinb9      | chr13:33096409-33109824   | 1.394733333 | 9.88429     |
| Jmjd5         | chr7:132588133-132605782  | 1.390983333 | 1.756709667 |
| Vwde          | chr6:13135609-13174965    | 1.39058     | 26.12848333 |
| Fam184a       | chr10:53352951-53470715   | 1.389726667 | 0.797035333 |
| Gpr172b       | chr15:76369372-76372560   | 1.389065    | 3.035728667 |
| Cyp4a12b      | chr4:115084228-115111639  | 1.3876691   | 10.4619     |
| Gm17762       | chr2:17948875-17952204    | 1.386425    | 0.195667668 |
| Gmfg          | chr7:29222465-29231914    | 1.38561     | 0.48365     |
| Tfpi          | chr2:84273016-84316932    | 1.38516     | 3.57553     |
| Nrip2         | chr6:128349783-128358953  | 1.38481     | 1.015626333 |
| Ncam1         | chr9:49310250-49607174    | 1.38389     | 2.97646     |
| Gm11110       | chr17:57231445-57245365   | 1.383313667 | 8.20105     |
| Plcl1         | chr1:55462789-55811129    | 1.381802467 | 0.485447    |
| Cchcr1        | chr17:35654060-35667960   | 1.381370667 | 1.830926667 |
| Cntnap1       | chr11:101037430-101052034 | 1.381241667 | 0.636805667 |
| Efna2         | chr10:79642226-79652755   | 1.380862    | 0.649737    |
| Pappa         | chr4:64785207-65018543    | 1.379963333 | 5.725801667 |
| Tlr2          | chr3:83640193-83645530    | 1.379022667 | 2.229388667 |
| Aif1          | chr17:35307936-35312946   | 1.378996667 | 0           |
| Foxa2         | chr2:147868613-147872705  | 1.378040333 | 21.0394     |
| Nynrin        | chr14:56472951-56493573   | 1.377793    | 1.394559667 |
| Spon2         | chr5:33556166-33560887    | 1.376623333 | 29.20676667 |
| Cct8l1        | chr5:25021884-25023845    | 1.37459     | 0           |
| Mfsd9         | chr1:40828884-40847502    | 1.374002333 | 2.06284     |
| AI427809      | chr4:53274227-53283104    | 1.372812667 | 0           |
| Pde11a        | chr2:75829188-76176710    | 1.372809667 | 0.939713333 |
| Cds1          | chr5:102194148-102252871  | 1.372659667 | 6.02339     |
| Tmem178       | chr17:81343971-81401156   | 1.372564667 | 1.6050818   |
| Myot          | chr18:44493727-44515376   | 1.372033333 | 0.217887733 |

|               |                           |             |             |
|---------------|---------------------------|-------------|-------------|
| Ptprt         | chr2:161353358-162486883  | 1.371874    | 6.051883333 |
| Spock1        | chr13:57522555-58009693   | 1.369170333 | 0.125061667 |
| Mettl1        | chr10:126478987-126482517 | 1.368329333 | 23.50176133 |
| Bbs12         | chr3:37211475-37220373    | 1.367738667 | 1.441673333 |
| Gpr126        | chr10:14122390-14264842   | 1.367031    | 0.873401333 |
| Trim45        | chr3:100726415-100740848  | 1.365841333 | 1.284522333 |
| Nxph3         | chr11:95371159-95375879   | 1.364287667 | 11.92106333 |
| Dsel          | chr1:113755278-113761495  | 1.364252    | 4.2198      |
| Jrk           | chr15:74532841-74539752   | 1.364136667 | 0.443961667 |
| Cdt1          | chr8:125091914-125097030  | 1.3625305   | 2.413782333 |
| Cables1       | chr18:11997782-12104136   | 1.361600333 | 3.23104     |
| Cd302         | chr2:60090049-60122475    | 1.361349667 | 16.75979333 |
| Ppp1r27       | chr11:120411288-120412446 | 1.360458333 | 1.072123333 |
| Cspg4         | chr9:56712910-56747677    | 1.359480333 | 0.861884467 |
| Nt5e          | chr9:88222446-88266927    | 1.358173333 | 2.93637     |
| Gm527         | chr12:66018897-66025578   | 1.35742     | 2.980683    |
| Map3k8        | chr18:4331324-4352951     | 1.357193    | 0.378600333 |
| Gzmm          | chr10:79151764-79158005   | 1.355211    | 0.46901     |
| Ppm1m         | chr9:106097283-106101564  | 1.351603367 | 4.40912     |
| Gm17769       | chr10:76881120-76883684   | 1.348215    | 0.143155667 |
| Gpr162        | chr6:124808462-124813935  | 1.347326667 | 0.762580333 |
| 9530053A07Rik | chr7:28914484-28949830    | 1.345565    | 0.92012     |
| Dcaf12l1      | chrX:42139743-42143374    | 1.344532333 | 1.104139    |
| Mmp2          | chr8:95351226-95377319    | 1.344385    | 3.19129     |
| Acad10        | chr5:122071037-122110519  | 1.340297333 | 2.381723    |
| H60c          | chr10:7078769-7090333     | 1.339942    | 10.13828    |
| Tmtc2         | chr10:104624719-105011535 | 1.339863333 | 1.796023333 |
| Fkbp7         | chr2:76501090-76511155    | 1.338874    | 5.343993333 |
| Kcnv1         | chr15:44937829-44946480   | 1.338380333 | 0.218798767 |
| Cd59b         | chr2:103911166-103925114  | 1.338152333 | 0.355096067 |
| ltpr1         | chr6:108163089-108501110  | 1.337006    | 5.086676667 |
| Rhod          | chr19:4425456-4439424     | 1.336326667 | 7.575813333 |
| Map3k14       | chr11:103081077-103128715 | 1.335867    | 0.948045667 |
| Fzd7          | chr1:59538990-59543799    | 1.335148533 | 9.156786667 |
| Edn2          | chr4:119834028-119839965  | 1.3346829   | 1.961607667 |
| Zfp493        | chr13:67880629-67890017   | 1.333401667 | 0.055025667 |
| Khdc1b        | chr1:21373636-21376465    | 1.333173333 | 0.056434867 |
| Fam114a1      | chr5:65361313-65433140    | 1.33301     | 2.871200333 |
| Gm13629       | chr2:66278936-66385529    | 1.332978333 | 0.5971807   |
| Begain        | chr12:110270391-110306427 | 1.332576333 | 1.271766667 |
| P2ry1         | chr3:60806716-60812901    | 1.332138333 | 3.358576667 |
| Prlh          | chr1:92849684-92850589    | 1.33202     | 0           |
| Tceal5        | chrX:132735489-132738390  | 1.330662333 | 0.771633667 |
| Zfp786        | chr6:47769264-47780504    | 1.330644233 | 1.607698667 |
| Rtn4rl1       | chr11:75007494-75081264   | 1.330033333 | 7.829913333 |
| Ephx4         | chr5:107832531-107859050  | 1.330033    | 3.001103    |
| Ankrd23       | chr1:36587378-36592574    | 1.327382333 | 4.95727     |
| Tesk2         | chr4:116393559-116476853  | 1.327342667 | 1.405625667 |
| Slc12a8       | chr16:33518414-33664221   | 1.325993667 | 0.166804667 |
| A530013C23Rik | chr2:167516707-167522913  | 1.325468667 | 0.637046333 |
| Unc13a        | chr8:74150611-74195656    | 1.323031    | 3.372613333 |
| Gm10731       | chr3:40657397-40659207    | 1.32281     | 0.460589267 |

|               |                           |             |             |
|---------------|---------------------------|-------------|-------------|
| Cage1         | chr13:38097920-38128806   | 1.322785    | 0.598053    |
| Mkrn3         | chr7:69562478-69565025    | 1.322753333 | 0.864656667 |
| 1600002H07Rik | chr17:24352000-24357714   | 1.320153    | 2.588946667 |
| Aldoart1      | chr4:72511616-72513668    | 1.316826667 | 0.715848    |
| Arxes2        | chrX:132528358-132529898  | 1.316482333 | 5.448606667 |
| Gm9047        | chr6:29421436-29423429    | 1.316372333 | 2.107743333 |
| Crem          | chr18:3266351-3337587     | 1.314683333 | 9.73582     |
| A530072M11Rik | chr4:16091256-16193372    | 1.313790167 | 0.955357733 |
| Nphp4         | chr4:151852250-151937293  | 1.313388667 | 1.096259    |
| Lcn2          | chr2:32240156-32243259    | 1.312986667 | 20.41527    |
| Fgf22         | chr10:79217863-79219706   | 1.312908333 | 3.051233333 |
| Ttyh1         | chr7:4071134-4087843      | 1.312377    | 0.861658    |
| Pctp          | chr11:89844730-89864208   | 1.311104333 | 5.658523333 |
| Ntf3          | chr6:126051429-126116762  | 1.310996667 | 0           |
| Slc5a10       | chr11:61486283-61534301   | 1.307358    | 0.072429033 |
| 4930545L23Rik | chr2:134995308-135041352  | 1.306936667 | 5.4971      |
| Fam55b        | chr9:48126086-48148981    | 1.305904667 | 0.772356333 |
| Gpr133        | chr5:129602624-129710474  | 1.303624    | 0.737955667 |
| Nek6          | chr2:38367216-38443010    | 1.303355667 | 0.713743667 |
| Mst1          | chr9:107982766-107987358  | 1.303016    | 4.401681333 |
| 2410021H03Rik | chr17:69624701-69626546   | 1.302963333 | 2.31671     |
| Gstt1         | chr10:75246557-75261329   | 1.302778    | 5.363732333 |
| Pitpnm3       | chr11:71861029-71949391   | 1.301771    | 3.230902    |
| Tyms          | chr5:30384739-30400165    | 1.3016741   | 4.655338667 |
| Nap1l3        | chrX:119508169-119510994  | 1.300328333 | 2.509376667 |
| Tspyl5        | chr15:33613629-33617638   | 1.298933333 | 1.897554667 |
| Unc79         | chr12:104187068-104422207 | 1.298839667 | 0.615021667 |
| Lrrc17        | chr5:21049344-21081720    | 1.297962333 | 0           |
| Il28ra        | chr4:135242371-135264095  | 1.297117    | 5.31269     |
| Lrrc32        | chr7:105642731-105650340  | 1.295335    | 0.35446     |
| Det1          | chr7:85972359-85992097    | 1.292683333 | 3.277573333 |
| Pcdhb10       | chr18:37571327-37574168   | 1.292355667 | 3.304891467 |
| Pak3          | chrX:139953133-140232339  | 1.291582    | 1.853981667 |
| Antxr1        | chr6:87083846-87285769    | 1.291465333 | 14.13647667 |
| Ltbp4         | chr7:28090159-28122631    | 1.291421333 | 12.28429    |
| Hlf           | chr11:90197848-90252231   | 1.2886655   | 3.533679667 |
| Gm15663       | chr10:105011606-105020926 | 1.288222333 | 1.997617333 |
| Hist1h1b      | chr13:21871751-21872423   | 1.286213333 | 3.99851     |
| Rab26         | chr17:24665998-24670692   | 1.285393333 | 0.050431633 |
| 1810010D01Rik | chr7:152391722-152394024  | 1.284639333 | 0           |
| Angptl1       | chr1:158769153-158791209  | 1.282826333 | 4.502675667 |
| Ccdc122       | chr14:77436578-77512011   | 1.282425    | 0.442001667 |
| Zfp712        | chr13:67139529-67162106   | 1.281927    | 2.168004667 |
| Fabp3         | chr4:129986021-129992707  | 1.281048333 | 0.147033    |
| Prss3         | chr6:41323757-41327612    | 1.280258333 | 0           |
| 1110021L09Rik | chr10:23516791-23547774   | 1.279476    | 1.680299433 |
| Hsd3b4        | chr3:98303002-98314490    | 1.279273333 | 0           |
| Hsd3b4        | chr3:98356473-98367961    | 1.279273333 | 0           |
| Dnd1          | chr18:36923324-36925868   | 1.279176    | 0.080164    |
| Ccdc146       | chr5:20798778-20930495    | 1.278513333 | 4.308857333 |
| 1700034J05Rik | chr6:146899822-146902943  | 1.278060333 | 2.007715333 |
| Hpca          | chr4:128788818-128798984  | 1.277706067 | 6.577829    |

|               |                           |             |             |
|---------------|---------------------------|-------------|-------------|
| Zfp30         | chr7:30569808-30579559    | 1.276459667 | 1.187978633 |
| Maf           | chr8:118227152-118230794  | 1.274797    | 7.740703333 |
| St3gal4       | chr9:34854163-34924395    | 1.274607667 | 3.63541     |
| 1700037C18Rik | chr16:3905797-3908689     | 1.274376667 | 1.642077333 |
| Nsg1          | chr5:38528431-38550706    | 1.27297     | 0.641356567 |
| H2-M10.2      | chr17:36421225-36423366   | 1.272351    | 0           |
| B130034C11Rik | chr16:87496317-87504283   | 1.271924333 | 0.140646333 |
| Gm10714       | chr2:173950538-174009419  | 1.27144     | 0.253845    |
| Gm4262        | chr16:11008990-11015277   | 1.269832    | 0.0563914   |
| 2610306M01Rik | chr6:86798400-86799434    | 1.268928667 | 1.030690333 |
| Prdm1         | chr10:44156980-44178493   | 1.268560333 | 4.138596667 |
| Ckm           | chr7:19996442-20006932    | 1.267938333 | 0.027919133 |
| Cdh4          | chr2:179177182-179634080  | 1.267327667 | 0.945835333 |
| 4833419F23Rik | chr18:4353544-4368943     | 1.2673      | 0           |
| Enthd1        | chr15:80282669-80390900   | 1.266977667 | 0           |
| Tnfrsf17      | chr16:11313901-11320161   | 1.266054333 | 0           |
| A330069E16Rik | chr2:91077302-91078514    | 1.264749    | 2.296286667 |
| LOC329427     | chr2:73434582-73454069    | 1.263771    | 1.195932333 |
| Slc2a13       | chr15:91098121-91403692   | 1.263695    | 0.778672733 |
| Oat           | chr7:139749157-139768081  | 1.263063    | 12.74213    |
| Rab19         | chr6:39331426-39340378    | 1.262040667 | 4.609553333 |
| D6Ert474e     | chr6:143194407-143246399  | 1.261188333 | 0           |
| Arhgef37      | chr18:61653447-61696190   | 1.261057667 | 2.845276    |
| Popdc2        | chr16:38362258-38378302   | 1.2587434   | 0           |
| Chpt1         | chr10:87935557-87966715   | 1.258066667 | 7.66918     |
| LOC100859962  | chr7:87207595-87220143    | 1.256312667 | 0.090088667 |
| Inca1         | chr11:70501862-70513657   | 1.255886333 | 1.798470667 |
| Neil2         | chr14:63801281-63812362   | 1.255434333 | 2.095793333 |
| Pomt1         | chr2:32092202-32110525    | 1.253618667 | 5.949713333 |
| Lgi2          | chr5:52929102-52957519    | 1.253258733 | 7.517405567 |
| Adam1b        | chr5:121950105-121952989  | 1.250088    | 0.107611467 |
| Rarres1       | chr3:67282807-67319445    | 1.249566667 | 4.5173789   |
| 9330182L06Rik | chr5:9266192-9480717      | 1.248498333 | 0.304673333 |
| Zc3h12b       | chrX:92907016-93123309    | 1.248326    | 1.056354533 |
| Zfp618        | chr4:62626607-62795064    | 1.247865333 | 3.789713333 |
| Ttc16         | chr2:32617696-32630903    | 1.245768    | 1.62435     |
| Nnat          | chr2:157385845-157388255  | 1.242224667 | 4.696363333 |
| Lcat          | chr8:108463450-108467302  | 1.240980333 | 0.658273333 |
| 4632434I11Rik | chr7:100006036-100022742  | 1.240508333 | 1.473028667 |
| Ccdc125       | chr13:101439435-101467195 | 1.240357333 | 6.581006667 |
| Terc          | chr3:96218359-96218756    | 1.237690333 | 1.580907667 |
| F630042J09Rik | chr13:67379529-67384297   | 1.236888    | 0.353613667 |
| Olfr99        | chr17:37416445-37417363   | 1.23655     | 0           |
| Gls2          | chr10:127631690-127647060 | 1.234580667 | 0.014950367 |
| Krt35         | chr11:99953505-99957538   | 1.234530667 | 18.01425933 |
| D130040H23Rik | chr8:71794978-71827274    | 1.233681333 | 0.034443733 |
| Cd300ld       | chr11:114843760-114851200 | 1.233067    | 0.201851333 |
| Cercam        | chr2:29725013-29738360    | 1.2323111   | 1.641903    |
| Tdo2          | chr3:81762335-81779650    | 1.232219333 | 0.063113667 |
| 4933409K07Rik | chr4:41902018-41925853    | 1.231923333 | 0.240148667 |
| Mast1         | chr8:87435751-87461252    | 1.230478667 | 0.316037333 |
| Zfp235        | chr7:24919181-24928260    | 1.230133333 | 3.179006667 |

|               |                           |             |             |
|---------------|---------------------------|-------------|-------------|
| Zscan2        | chr7:88006993-88021399    | 1.229473333 | 2.22896     |
| 6430704M03Rik | chr4:56973007-57003263    | 1.229214    | 0.009230633 |
| Cdsn          | chr17:35689072-35694125   | 1.22849     | 0.488492333 |
| H19           | chr7:149761436-149764051  | 1.226936    | 3.539454    |
| Lrguk         | chr6:33979447-34084034    | 1.225974333 | 0.970089333 |
| Lmo2          | chr2:103798151-103822035  | 1.225267667 | 0.085817    |
| Gamt          | chr10:79720895-79723713   | 1.22506     | 6.156026667 |
| Zbtb12        | chr17:35031503-35033789   | 1.224500333 | 3.459428333 |
| Cd160         | chr3:96602685-96633274    | 1.224303333 | 2.934946333 |
| C1qa          | chr4:136451830-136454759  | 1.223986    | 0.048825    |
| Ankdd1b       | chr13:97186088-97241115   | 1.223656333 | 0.202545    |
| Axl           | chr7:26541518-26573752    | 1.22289     | 0.292125    |
| 9830147E19Rik | chr7:49864895-49897974    | 1.222484333 | 3.083603333 |
| Igsf5         | chr16:96583363-96643728   | 1.2201694   | 0           |
| Osgin1        | chr8:121961061-121970156  | 1.220086667 | 13.93823667 |
| Ysk4          | chr1:129711847-129736867  | 1.218618667 | 2.321236667 |
| Hs3st5        | chr10:36226612-36554200   | 1.217810333 | 2.779618    |
| Rundc3b       | chr5:8490335-8622952      | 1.217242    | 1.437593333 |
| Rpusd3        | chr6:113365312-113369334  | 1.217136667 | 0.880744667 |
| Cyp2j11       | chr4:95961198-96015371    | 1.216613333 | 0.049353667 |
| Krt78         | chr15:101776434-101784718 | 1.216540333 | 5.8306      |
| Ehd2          | chr7:16534335-16552884    | 1.216460333 | 5.373676667 |
| Gm10336       | chr13:12274983-12278755   | 1.216175333 | 4.021527333 |
| BC052040      | chr2:115407451-115604504  | 1.215126    | 7.651726667 |
| lkbke         | chr1:133151178-133176140  | 1.213575333 | 3.233064333 |
| Gm8050        | chr14:6805243-6809942     | 1.213328333 | 0.655988333 |
| Trim30a       | chr7:111557539-111613707  | 1.211463333 | 0.413062    |
| Tnfrsf1b      | chr4:144802270-144836773  | 1.210039633 | 0.340333333 |
| Nmu           | chr5:76762519-76792802    | 1.209726667 | 1.469883333 |
| Dynlrb2       | chr8:119028914-119039815  | 1.209707333 | 32.82403    |
| C030016D13Rik | chr19:27504526-27507121   | 1.209425667 | 0.014104    |
| Haus5         | chr7:31438726-31450013    | 1.209362333 | 3.279552333 |
| Zbtb8a        | chr4:129030875-129055272  | 1.206174    | 1.289977333 |
| Cdca8         | chr4:124595708-124614161  | 1.205452    | 5.592103333 |
| Ncf1          | chr5:134696129-134705495  | 1.204964    | 0.898449333 |
| MacroD1       | chr19:7131257-7272552     | 1.204206667 | 3.207395    |
| Rprl3         | chr8:3803124-3803361      | 1.203923333 | 1.930743333 |
| Pou4f1        | chr14:104861540-104867216 | 1.20338     | 2.287118    |
| Prh1          | chr6:132519859-132522419  | 1.203197    | 0           |
| Zfp498        | chr5:146044211-146052338  | 1.201506633 | 2.801289333 |
| Gnat2         | chr3:107895985-107904203  | 1.2012184   | 1.123526    |
| Rhbg          | chr3:88046795-88058606    | 1.200022333 | 1.143206667 |
| Cd33          | chr7:50782825-50788541    | 1.198076667 | 0.710566667 |
| Nhej1         | chr1:75013919-75121800    | 1.197397333 | 4.769502    |
| Fat2          | chr11:55064111-55125759   | 1.19525     | 7.83959     |
| Tmsb15b2      | chrX:133489528-133492518  | 1.19487125  | 1.673574536 |
| Zfp455        | chr13:67295441-67310234   | 1.194171667 | 0.681395    |
| Krtap3-2      | chr11:99417136-99418167   | 1.193462    | 2.640544667 |
| Hmmr          | chr11:40514889-40546939   | 1.193306    | 5.27498     |
| Vsig8         | chr1:174486068-174493848  | 1.190904333 | 18.80985333 |
| Ppt2          | chr17:34753606-34764042   | 1.190595933 | 5.53949     |
| Krtap9-3      | chr11:99458661-99459420   | 1.19022     | 0           |

|               |                           |             |             |
|---------------|---------------------------|-------------|-------------|
| Csf2rb2       | chr15:78112939-78136033   | 1.190012    | 0.5191869   |
| Emilin3       | chr2:160732173-160738064  | 1.189536667 | 0.35714     |
| Arhgap15      | chr2:43604343-44243143    | 1.1893748   | 0.165432667 |
| U05342        | chr19:12838017-12870613   | 1.188795055 | 1.69E-06    |
| Rnf152        | chr1:107173493-107253287  | 1.188253333 | 2.238916667 |
| H2-Q6         | chr17:35561821-35565306   | 1.187413667 | 0.814616333 |
| Ttl11         | chr2:35606759-35835144    | 1.186403333 | 0.81826     |
| Ugt1a2        | chr1:90097185-90116577    | 1.185730667 | 0.024114934 |
| Mpdz          | chr4:80924403-81088709    | 1.185664333 | 1.004889667 |
| 2210020M01Rik | chr11:115761452-115767583 | 1.185503    | 3.002613333 |
| Ppp1r36       | chr12:77518585-77540478   | 1.184496667 | 3.00516     |
| Pramef12      | chr4:143981576-143998367  | 1.1818      | 0.651352333 |
| Acpl2         | chr9:96723761-96789841    | 1.181267    | 1.221767333 |
| Vpreb1        | chr16:16868493-16869348   | 1.181172    | 0           |
| Fam171b       | chr2:83652884-83721515    | 1.180369233 | 0.617263367 |
| Slc27a5       | chr7:13573695-13583541    | 1.180268333 | 0           |
| Met           | chr6:17413956-17523980    | 1.179801    | 2.065481    |
| B130024G19Rik | chr7:77510268-77556032    | 1.179633333 | 0           |
| Spsb4         | chr9:96843900-96918774    | 1.179413333 | 0.858491    |
| Klhl14        | chr18:21708877-21810869   | 1.179112333 | 0.379823333 |
| 3000002C10Rik | chr9:109732667-109733945  | 1.176709333 | 5.994929333 |
| Gm20594       | chr6:79768024-79768358    | 1.174285667 | 2.339996667 |
| Dlx5          | chr6:6827804-6832068      | 1.174258667 | 0.806052333 |
| Galnt10       | chr11:57458943-57601002   | 1.17396     | 3.183826667 |
| Icosl         | chr10:77532112-77542270   | 1.173745333 | 1.0846113   |
| Tmem213       | chr6:38059352-38065806    | 1.173166667 | 0.61484     |
| Mdfi          | chr17:47952280-47971640   | 1.171825667 | 3.075281333 |
| 9130227L01Rik | chr1:55988084-56028942    | 1.171326667 | 0.225889333 |
| Nckap5        | chr1:127810212-128727209  | 1.170286667 | 0.045292667 |
| Lyl1          | chr8:87225355-87228615    | 1.168690667 | 0.321036    |
| 1700012L04Rik | chrX:8860889-8861414      | 1.168359667 | 0.058490733 |
| Itpr1p12      | chr7:125628625-125635489  | 1.167581    | 0.700150767 |
| Kif20a        | chr18:34784277-34792931   | 1.167398333 | 5.100731    |
| Mfsd2b        | chr12:4869243-4881165     | 1.167055467 | 0.315344333 |
| Frem2         | chr3:53317859-53461277    | 1.166555333 | 0.825282333 |
| Gpr152        | chr19:4139798-4145740     | 1.166549267 | 0.045283333 |
| Gm1653        | chr3:148937700-148942944  | 1.166299667 | 0           |
| 4930579G22Rik | chr5:130384409-130387151  | 1.16625     | 3.222466667 |
| Mir17hg       | chr14:115443611-115445950 | 1.166039    | 2.076226667 |
| Napb          | chr2:148520392-148558156  | 1.165578667 | 0.882531    |
| Zfp707        | chr15:75799614-75806295   | 1.163937333 | 1.554453333 |
| Esm1          | chr13:113999866-114008312 | 1.16329     | 0.432518    |
| Ddx59         | chr1:138311847-138336797  | 1.162695667 | 4.241143333 |
| Dyrk3         | chr1:133025017-133034811  | 1.161817    | 1.545691167 |
| 1700013N18Rik | chr5:108259271-108260783  | 1.160343333 | 1.309933333 |
| Lif           | chr11:4157570-4172517     | 1.159713    | 0.496245    |
| Xkr8          | chr4:132280818-132288461  | 1.159163667 | 0.925913    |
| Rab17         | chr1:92854709-92866197    | 1.158274333 | 0.42561     |
| Mtap          | chr4:88783273-88826994    | 1.158100667 | 2.381999667 |
| Jph4          | chr14:55725662-55735772   | 1.156997    | 0           |
| Ssbp2         | chr13:91600701-91845780   | 1.156581    | 7.604603333 |
| Brsk2         | chr7:149135655-149190148  | 1.156239667 | 3.65232     |

|               |                           |             |             |
|---------------|---------------------------|-------------|-------------|
| Lipm          | chr19:34175432-34197177   | 1.155322667 | 2.645053333 |
| Ccdc51        | chr9:108985009-108995877  | 1.153409767 | 2.117886667 |
| Vmn2r21       | chr6:123442525-123483424  | 1.152487667 | 0           |
| Vmn2r22       | chr6:123559775-123600653  | 1.152487667 | 0           |
| Pi16          | chr17:29455826-29465847   | 1.152194    | 2.187322333 |
| Tdrd12        | chr7:36278628-36322763    | 1.15203     | 0           |
| 1110017D15Rik | chr4:41452041-41464366    | 1.151902333 | 15.2538     |
| Slc35f3       | chr8:128822478-128919877  | 1.15099     | 0.013073367 |
| Spata5l1      | chr2:122456360-122458440  | 1.150458667 | 0.459778    |
| B830017H08Rik | chr16:17833211-17835112   | 1.149644    | 0.370471333 |
| Slc6a5        | chr7:57165668-57214863    | 1.14964     | 0           |
| Hs3st4        | chr7:131126694-131542503  | 1.147526    | 0           |
| Fam78a        | chr2:31922404-31939225    | 1.147405    | 0.325061333 |
| Tmem119       | chr5:114243737-114250361  | 1.147403667 | 0           |
| Tnfaip8l3     | chr9:53873412-53916218    | 1.146698433 | 2.773456667 |
| Shd           | chr17:56109904-56116042   | 1.146584667 | 1.549827    |
| Prkar1b       | chr5:139493257-139606340  | 1.146033667 | 2.406210333 |
| Ppef2         | chr5:92655999-92682185    | 1.14523     | 0.299039333 |
| Anapc11       | chr11:120459734-120469512 | 1.14521     | 2.783121    |
| Dsg4          | chr18:20594675-20630322   | 1.144860667 | 1.7377      |
| Fam110b       | chr4:5571325-5727091      | 1.144710333 | 1.929663333 |
| BC089491      | chr7:29069670-29076153    | 1.144366667 | 2.23186     |
| E130102H24Rik | chr4:101019128-101028853  | 1.142482333 | 0.371258667 |
| Xlr3a         | chrX:70331631-70342434    | 1.142253333 | 2.805733333 |
| Cyp2b10       | chr7:26682682-26711643    | 1.141145    | 3.232866667 |
| Cdc42ep2      | chr19:5917555-5924816     | 1.138696667 | 12.88626433 |
| Muc6          | chr7:148819947-148841207  | 1.137277    | 2.77649     |
| Cybb          | chrX:9012377-9046450      | 1.137206667 | 2.219483333 |
| Wee1          | chr7:117265572-117286813  | 1.137189    | 1.122120333 |
| Fermt1        | chr2:132729914-132771772  | 1.137078667 | 7.203183333 |
| Tnfsf12       | chr11:69499741-69509600   | 1.136416333 | 0.974863333 |
| Pla2g4e       | chr2:119992147-120071071  | 1.136201333 | 2.506649    |
| Slc25a10      | chr11:120353150-120362475 | 1.135609333 | 2.79131     |
| Gemin4        | chr11:76024072-76031074   | 1.133384    | 2.057176667 |
| Ttc28         | chr5:111308821-111718799  | 1.132740333 | 13.85434667 |
| Serinc4       | chr2:121276912-121282500  | 1.132033342 | 0.210007333 |
| Prickle2      | chr6:92320885-92656178    | 1.131913333 | 2.652251    |
| H2-Q2         | chr17:35479277-35482667   | 1.131851333 | 8.214315    |
| 4933406F09Rik | chr14:8244986-8255199     | 1.131258667 | 0           |
| Fam131b       | chr6:42265310-42274639    | 1.130418    | 2.876003333 |
| Neil1         | chr9:56991062-56994841    | 1.129897    | 8.29108     |
| Evi2a         | chr11:79340062-79344111   | 1.129162667 | 0.403743333 |
| Slc35f1       | chr10:52410306-52831428   | 1.1284811   | 0.011791067 |
| Wscd1         | chr11:71564204-71603148   | 1.128284    | 0.199831333 |
| Sstr2         | chr11:113485570-113486950 | 1.127506667 | 0.375576667 |
| 4931440P22Rik | chr3:65331406-65333336    | 1.125605333 | 0.223344333 |
| Gbp4          | chr5:105544785-105568605  | 1.1241603   | 0.017864867 |
| Tas1r2        | chr4:139209452-139226194  | 1.123866    | 238.9566667 |
| Dlg2          | chr7:98239295-99597756    | 1.1236316   | 2.494436667 |
| Nr1i3         | chr1:173144100-173148976  | 1.123289    | 0.107104    |
| Lgi4          | chr7:31844953-31855954    | 1.122875667 | 0.759078333 |
| Ptger4        | chr15:5183403-5193831     | 1.120987    | 5.803079667 |

|               |                           |             |             |
|---------------|---------------------------|-------------|-------------|
| Frs3          | chr17:47832155-47841235   | 1.119806    | 0.247849667 |
| Rgma          | chr7:80520405-80564785    | 1.119295667 | 2.773204    |
| Fam132a       | chr4:155336420-155340738  | 1.11876     | 0.505064333 |
| Fam18a        | chr16:10420651-10447443   | 1.115963333 | 1.318281667 |
| Gm4902        | chr14:59939800-59960167   | 1.115746667 | 0.917749667 |
| Lmtk3         | chr7:53039316-53059500    | 1.112774667 | 1.602507    |
| Wnt11         | chr7:105987354-106003257  | 1.111000667 | 0.902266667 |
| Flywch1       | chr17:23892389-23908558   | 1.110665    | 0.597746    |
| Lepre1        | chr4:118905519-118921582  | 1.109154333 | 0.286299    |
| 9130014G24Rik | chr10:10055500-10192112   | 1.107356    | 3.085516667 |
| Pold1         | chr7:51788113-51804185    | 1.107312667 | 0.137842067 |
| Zfp874a       | chr13:67541366-67552560   | 1.107209    | 1.668784333 |
| 2610002D18Rik | chr4:134066913-134079837  | 1.106507667 | 0.264972333 |
| Gjb5          | chr4:127032052-127035408  | 1.1063      | 2.146086333 |
| Abcc3         | chr11:94204608-94254290   | 1.106022333 | 1.128094333 |
| Gm9079        | chr10:121515167-121516935 | 1.105581333 | 1.761606667 |
| Gm6567        | chr7:80242637-80246954    | 1.105086667 | 0           |
| Cfi           | chr3:129539656-129578246  | 1.104203667 | 0.0331308   |
| Postn         | chr3:54165028-54194963    | 1.103431    | 0.178252    |
| Syt2          | chr1:136543257-136645994  | 1.103373    | 0.229885    |
| Nudt8         | chr19:4000579-4002102     | 1.103259333 | 2.397593333 |
| Serpnb9d      | chr13:33284827-33295849   | 1.103156    | 0.444483333 |
| Fam71e1       | chr7:51751957-51756504    | 1.101867    | 1.535264333 |
| Chaf1a        | chr17:56179838-56207449   | 1.098508667 | 3.603565667 |
| 1700012A16Rik | chr1:155272338-155299704  | 1.098154667 | 1.466866333 |
| Slc25a30      | chr14:76161805-76186844   | 1.097982    | 7.692743333 |
| 6330403K07Rik | chr11:70845442-70847119   | 1.097746667 | 0.337366667 |
| Fen1          | chr19:10273628-10278433   | 1.096959667 | 1.496576    |
| Haus3         | chr5:34496547-34512073    | 1.095333333 | 5.303543333 |
| Dock4         | chr12:41172639-41573075   | 1.095003667 | 2.162703333 |
| Sh3bp1        | chr15:78730215-78742482   | 1.094797    | 7.62564     |
| Gm4787        | chr12:82477977-82480473   | 1.09472     | 1.266943333 |
| 4932412H11Rik | chr5:3845172-3866596      | 1.094346633 | 1.235416867 |
| Trim66        | chr7:116592514-116651648  | 1.094063667 | 0.109328667 |
| Cyp26b1       | chr6:84521407-84543902    | 1.0939285   | 0.541465667 |
| Vim           | chr2:13495937-13504453    | 1.092508667 | 3.235244667 |
| 2810032G03Rik | chr12:5383307-5422938     | 1.092075    | 1.118300733 |
| Tmem56        | chr3:120904927-120966234  | 1.092055067 | 2.211232267 |
| Zscan20       | chr4:128260782-128287342  | 1.090567333 | 2.502237333 |
| Plin5         | chr17:56251023-56256971   | 1.089666667 | 0.831381    |
| Nrp1          | chr8:130882972-131029375  | 1.089541    | 0.359699333 |
| Sycp1         | chr3:102622421-102740023  | 1.088990667 | 0.188325    |
| Al118078      | chr9:55174755-55286151    | 1.088797533 | 0.019374467 |
| Phyhipl       | chr10:70020433-70062039   | 1.08727     | 1.93899     |
| Naif1         | chr2:32305976-32310996    | 1.086848333 | 0.505437333 |
| 4930486I03Rik | chr1:20346534-20382381    | 1.086556667 | 2.869396667 |
| Fbxl8         | chr8:107788547-107793226  | 1.085017667 | 2.437266667 |
| Grm8          | chr6:27225120-28084369    | 1.083643467 | 0.477736667 |
| Nuak1         | chr10:83834063-83903216   | 1.083297667 | 0.347717667 |
| Dach1         | chr14:98186065-98568762   | 1.082273667 | 2.137526667 |
| Gm10818       | chr16:32665308-32668283   | 1.081342333 | 0           |
| Myo3a         | chr2:22149129-22473772    | 1.081198    | 0.330805667 |



|               |                           |             |             |
|---------------|---------------------------|-------------|-------------|
| 1700028E10Rik | chr5:152171249-152216658  | 1.080750333 | 0.105804    |
| Grb10         | chr11:11830501-11937423   | 1.077843    | 0           |
| Tmc3          | chr7:90733440-90772219    | 1.077302    | 0.739094333 |
| Rhox4f        | chrX:35017401-35022193    | 1.077048    | 0.0260465   |
| D030028A08Rik | chr11:96805459-96826374   | 1.077006333 | 2.18215     |
| Rab38         | chr7:95578782-95640082    | 1.076236333 | 14.60232    |
| Nutf2         | chr8:108384533-108404301  | 1.076116006 | 2.568746    |
| Prkcc         | chr7:3303657-3331005      | 1.075876667 | 9.212393333 |
| Dbpht2        | chr12:75398460-75401455   | 1.075693333 | 0.830189767 |
| 4930404I05Rik | chr16:91011493-91016748   | 1.075589667 | 2.385366667 |
| Ehhadh        | chr16:21761357-21787907   | 1.075509    | 4.486823    |
| Plod1         | chr4:147283861-147310885  | 1.074906667 | 2.439786767 |
| Sprr2i        | chr3:92211912-92213193    | 1.07326     | 0           |
| Dio1          | chr4:106964069-106979748  | 1.072869    | 22.5016     |
| Schip1        | chr3:67868723-68430404    | 1.072863333 | 0.952983333 |
| Arl13a        | chrX:130722039-130742569  | 1.072286667 | 0           |
| Exd1          | chr2:119345139-119373363  | 1.071573333 | 0.285090533 |
| Pira2         | chr7:3788411-3796653      | 1.07139     | 0           |
| Oaz3          | chr3:94237087-94240538    | 1.071095333 | 0.145336    |
| Scml4         | chr10:42580317-42680588   | 1.068736667 | 2.820991333 |
| Zfp112        | chr7:24897338-24912971    | 1.068476667 | 0.052788233 |
| Pldi          | chr10:60390973-60400880   | 1.067895333 | 0.73267     |
| Fam115e       | chr6:42537211-42547371    | 1.066052    | 0.571089333 |
| Gm2506        | chr4:42349016-42354418    | 1.065171475 | 4.269698333 |
| A330035P11Rik | chr14:122497160-122506196 | 1.064618067 | 4.096339167 |
| Ccdc39        | chr3:33711282-33743232    | 1.063601733 | 12.59953333 |
| Trim60        | chr8:67522346-67542587    | 1.063541    | 0.431962667 |
| Rgs1          | chr1:155626516-155691271  | 1.062919    | 0.039226333 |
| Pih1d2        | chr9:50425425-50433105    | 1.060555    | 5.692107333 |
| Klhdc9        | chr1:173288579-173290929  | 1.060455667 | 1.283778    |
| Spats2        | chr15:98957275-99042897   | 1.059900333 | 5.11632     |
| Aim1l         | chr4:133624366-133648419  | 1.0577896   | 4.393386333 |
| Il1f5         | chr2:24132473-24137952    | 1.056755167 | 1.020698333 |
| Pkib          | chr10:57351786-57460918   | 1.056283667 | 8.822043333 |
| Ncrna00086    | chrX:53627762-53631647    | 1.055714667 | 1.803443333 |
| Elf5          | chr2:103252254-103291145  | 1.055095    | 0.699164    |
| Nefm          | chr14:68737601-68743061   | 1.054646667 | 0.055791    |
| 1700001L05Rik | chr15:83184276-83197727   | 1.050755    | 3.849526    |
| Rarb          | chr14:17263353-17407724   | 1.049948333 | 2.068716667 |
| S100a7a       | chr3:90458223-90462052    | 1.049913333 | 2.348436667 |
| Gm7173        | chrX:76727906-76762624    | 1.049476433 | 1.149254667 |
| Adamts3       | chr5:90102865-90312359    | 1.049100667 | 0.160137    |
| Hapln3        | chr7:86261912-86275904    | 1.048       | 0           |
| 4732415M23Rik | chr8:125736757-125745945  | 1.047890333 | 0           |
| Ccdc94        | chr17:56098609-56107374   | 1.046731333 | 11.53609667 |
| Liph          | chr16:21953890-21995615   | 1.046617333 | 1.84065     |
| Tpx2          | chr2:152673699-152721057  | 1.046607733 | 3.616013333 |
| Hmga1         | chr17:27693518-27700617   | 1.0465      | 3.647035    |
| Ggt6          | chr11:72249027-72251906   | 1.046483667 | 4.52273     |
| Fxyd7         | chr7:31827533-31836473    | 1.046183333 | 0           |
| Racgap1       | chr15:99450927-99482087   | 1.0456947   | 3.776603333 |
| Ak5           | chr3:152125778-152331104  | 1.045512667 | 0.401936    |

|               |                          |             |             |
|---------------|--------------------------|-------------|-------------|
| A630001G21Rik | chr1:87613657-87633181   | 1.044905    | 0.331506333 |
| Rilpl1        | chr5:124943088-124981400 | 1.043853    | 1.193199667 |
| Rhobtb3       | chr13:76006984-76081272  | 1.042347667 | 5.33187     |
| Edaradd       | chr13:12563475-12612717  | 1.042282333 | 3.087847333 |
| Pgm5          | chr19:24752750-24936332  | 1.042238667 | 0           |
| Cst6          | chr19:5344704-5349574    | 1.041434667 | 1.886966267 |
| Rsad1         | chr11:94401111-94410521  | 1.041363    | 0.693965333 |
| Cenpl         | chr1:163001022-163016474 | 1.041288333 | 3.909118567 |
| Ust           | chr10:7924550-8238623    | 1.041275    | 3.141228333 |
| Fancc         | chr13:63406016-63533053  | 1.041090333 | 12.99717667 |
| Odf3l2        | chr10:79102270-79108483  | 1.040992333 | 0.416005667 |
| C2cd4c        | chr10:79069598-79076770  | 1.040927333 | 4.212783333 |
| Il1r1         | chr1:40281924-40373022   | 1.040473333 | 2.698301333 |
| Gpr153        | chr4:151648470-151659446 | 1.040276667 | 0.073966867 |
| Mbd4          | chr6:115790714-115803359 | 1.0391245   | 10.02638667 |
| A230072E10Rik | chrX:147747877-147776422 | 1.038205333 | 2.485330667 |
| Gm14501       | chrX:8927724-8928263     | 1.03689     | 0.074497633 |
| Snca          | chr6:60681566-60779849   | 1.036420667 | 17.6724     |
| BC051142      | chr17:34535764-34597679  | 1.036366    | 1.382486    |
| P2rx6         | chr16:17561977-17572105  | 1.0357581   | 0.510605333 |
| Slfm8         | chr11:82815659-82834312  | 1.035422967 | 0.136197667 |
| Hvcn1         | chr5:122659745-122692306 | 1.03508     | 1.879       |
| Xkr6          | chr14:64225366-64439247  | 1.034773667 | 1.34437     |
| Fam151b       | chr13:93219574-93253986  | 1.033567667 | 4.420050333 |
| Acy3          | chr19:3986660-3990005    | 1.032673133 | 0.112903167 |
| Plac9         | chr14:26707888-26722379  | 1.03238     | 0.756857333 |
| Plac9         | chr14:26847658-26862145  | 1.03238     | 0.756857333 |
| Plac9         | chr14:26987272-27001759  | 1.03238     | 0.756857333 |
| Kank2         | chr9:21571216-21602990   | 1.032304    | 0.994819333 |
| Zfp114        | chr7:24960063-24967337   | 1.0318841   | 0.791932667 |
| Fam131a       | chr16:20695129-20703109  | 1.031306667 | 4.183096667 |
| A930041C12Rik | chr5:108059268-108062869 | 1.030935667 | 0           |
| Scamp5        | chr9:57289133-57315831   | 1.030514333 | 4.666146667 |
| Pcolce        | chr5:138046334-138052632 | 1.029689667 | 9.615366667 |
| Vegfc         | chr8:55162885-55271808   | 1.029192667 | 0           |
| Gm15645       | chr7:113010294-113011841 | 1.028623    | 0.550551333 |
| Lbp           | chr2:158132228-158158588 | 1.028563    | 4.235943333 |
| D030040B21Rik | chr1:16647632-16652359   | 1.02815     | 0.013048    |
| Gm11190       | chr11:77725628-77742790  | 1.027841    | 0           |
| Lrrn2         | chr1:134776931-134836582 | 1.026254    | 0           |
| 4930524B15Rik | chr11:31865632-31879651  | 1.02489     | 1.530601333 |
| Dapk1         | chr13:60703307-60864547  | 1.024532    | 2.688205333 |
| Lrp8          | chr4:107474863-107549445 | 1.022566667 | 3.104166667 |
| Myopop        | chr7:19576593-19587115   | 1.022555    | 5.235339667 |
| 6720489N17Rik | chr13:62704374-62725542  | 1.022417333 | 0.514681    |
| Sh3bp4        | chr1:90967036-91050368   | 1.021723667 | 5.359266667 |
| Smyd4         | chr11:75161934-75219207  | 1.020274667 | 0.634666433 |
| 2010001M06Rik | chr5:135487991-135489027 | 1.019836667 | 0           |
| Kif24         | chr4:41337780-41411881   | 1.019813667 | 4.375233333 |
| 4921507L20Rik | chr2:93820190-93823732   | 1.018561667 | 0.050211333 |
| Efna4         | chr3:89137314-89141950   | 1.017803    | 6.786543333 |
| Nt5dc2        | chr14:31948038-31952310  | 1.016619    | 3.399603333 |

|               |                           |             |             |
|---------------|---------------------------|-------------|-------------|
| 9430020K01Rik | chr18:4634926-4682867     | 1.016513667 | 4.045607    |
| Gm4925        | chr10:88192285-88193846   | 1.016104333 | 1.494073333 |
| Osr2          | chr15:35225866-35233060   | 1.014695333 | 2.920563333 |
| B3galt5       | chr16:96457407-96541465   | 1.013466667 | 1.016253333 |
| Sag           | chr1:89700254-89741732    | 1.013243333 | 0.100487333 |
| 2310068J16Rik | chr15:99802597-99803718   | 1.012254    | 0.095729667 |
| Tonsl         | chr15:76456666-76470359   | 1.010951333 | 3.581174333 |
| Glis2         | chr16:4594712-4615957     | 1.010825    | 7.247063333 |
| Tmem221       | chr8:74078201-74082770    | 1.010226667 | 2.576003    |
| Galns         | chr8:125102136-125135387  | 1.008654    | 2.070156667 |
| Cav2          | chr6:17231340-17239011    | 1.006961667 | 3.04928     |
| Morc4         | chrX:136356173-136406193  | 1.006676333 | 3.610992    |
| Prune2        | chr19:17030607-17298422   | 1.006549333 | 0.766137333 |
| Ppm1n         | chr7:19862155-19865398    | 1.006253333 | 2.73074     |
| Ass1          | chr2:31325789-31376190    | 1.005821667 | 2.281793    |
| Rab34         | chr11:78001928-78005695   | 1.004882667 | 6.358926667 |
| Krt31         | chr11:99907959-99911865   | 1.003876333 | 0.979122267 |
| Ccdc33        | chr9:57876488-57966630    | 1.003270333 | 1.240297333 |
| Foxm1         | chr6:128313011-128325904  | 1.003242167 | 0.575792    |
| Thrsp         | chr7:104561466-104566020  | 1.001953333 | 0.284452333 |
| A230108P19Rik | chr2:6114296-6242657      | 1.000570667 | 0.039215367 |
| Gpr62         | chr9:106366290-106368271  | 1.000400167 | 0.25372     |
| Fam89a        | chr8:127264156-127275709  | 0.998988667 | 0           |
| Tmem45a       | chr16:56805273-56886276   | 0.998124    | 3.210377667 |
| Tmem154       | chr3:84470113-84508497    | 0.998078667 | 20.78009333 |
| Arl4d         | chr11:101526854-101529146 | 0.997818667 | 0.591467667 |
| B230208H11Rik | chr10:12636443-12642925   | 0.997273333 | 0.519293333 |
| Asgr1         | chr11:69867870-69871396   | 0.996776667 | 0.292556667 |
| 1700016D06Rik | chr8:11654923-11678750    | 0.99511     | 0           |
| C1qtnf1       | chr11:118289770-118313096 | 0.994302667 | 1.22979     |
| Bcl7c         | chr7:134848491-134852280  | 0.994133467 | 0.798278    |
| 2410131K14Rik | chr5:118695235-118713123  | 0.993274667 | 4.374846667 |
| Oit1          | chr14:9181461-9211277     | 0.992936    | 16.09310667 |
| Fank1         | chr7:140968573-141073215  | 0.992853333 | 1.842557667 |
| Tub           | chr7:116154393-116177973  | 0.992656    | 1.456347333 |
| Plch1         | chr3:63500155-63654913    | 0.991949333 | 2.369328    |
| Cmtm5         | chr14:55555306-55558114   | 0.990893333 | 0.041311667 |
| Metrn1        | chr11:121563740-121578703 | 0.990725    | 0.765493333 |
| Gtse1         | chr15:85690136-85707003   | 0.990619    | 0.487520333 |
| 2010001E11Rik | chr10:39640187-39646729   | 0.989114967 | 0           |
| Ccdc162       | chr10:41258654-41307559   | 0.988961333 | 4.695936667 |
| Ush1c         | chr7:53450720-53493860    | 0.988843333 | 0           |
| Fmn1          | chr11:103032451-103060214 | 0.988029667 | 3.22249     |
| 4933413J09Rik | chr14:27177032-27219942   | 0.987002667 | 2.83101     |
| Lce1f         | chr3:92522617-92524272    | 0.98691     | 0           |
| Fitm2         | chr2:163294438-163298365  | 0.986407    | 0.813904    |
| Fv1           | chr4:147243087-147244467  | 0.986308    | 5.295813333 |
| A030009H04Rik | chr11:69154270-69156149   | 0.985743333 | 1.794322667 |
| Prg4          | chr1:152296541-152313295  | 0.984755667 | 4.167825333 |
| Gm8050        | chr14:5267559-5272258     | 0.984561667 | 0.798817333 |
| Dph2          | chr4:117561247-117564608  | 0.984527333 | 5.876771667 |
| Gm5547        | chr3:105618484-105620277  | 0.983756667 | 0           |

|               |                                 |             |             |
|---------------|---------------------------------|-------------|-------------|
| 1700018L02Rik | chr19:29121972-29123219         | 0.983743333 | 1.137482    |
| Atp2b2        | chr6:113695661-113992074        | 0.983048333 | 0.123284033 |
| Acad12        | chr5:122048289-122068947        | 0.982694333 | 1.67559     |
| Ly6c2         | chr15:74938590-74942379         | 0.982501    | 0.375116333 |
| Hus1b         | chr13:31038444-31039630         | 0.982135    | 0.178364333 |
| Olfra457      | chr6:42421233-42422175          | 0.9803867   | 1.092614    |
| Camk1         | chr6:113284117-113293916        | 0.978170333 | 0.238291333 |
| D7Erttd715e   | chr7:67114462-67119317          | 0.978131667 | 0.735233333 |
| Sectm1a       | chr11:120928716-120942453       | 0.977565333 | 0           |
| Pdia5         | chr16:35397397-35490959         | 0.977456667 | 2.534798367 |
| Trpv2         | chr11:62387987-62413807         | 0.977304333 | 1.077584333 |
| Zfp651        | chr9:121669150-121680860        | 0.976987    | 5.143076667 |
| Msh5          | chr17:35165549-35183668         | 0.97632     | 0.47803     |
|               | 31-Aug chr7:134357955-134361959 | 0.975639    | 0.388099667 |
| Shq1          | chr6:100523075-100621151        | 0.975554    | 8.924183333 |
| Batf3         | chr1:192922292-192932822        | 0.97528     | 0.536336667 |
| Hells         | chr19:39005479-39042767         | 0.975246833 | 0.557591    |
| Olfra986      | chr9:39994663-39995679          | 0.975136667 | 0           |
| Lrrc3b        | chr14:16190030-16271501         | 0.974221    | 0           |
| Hrc           | chr7:52590638-52594342          | 0.972652    | 1.060630333 |
| Cfp           | chrX:20502660-20508650          | 0.972399567 | 3.99879     |
| Garnl3        | chr2:32841885-32942724          | 0.971837667 | 0.642729333 |
| Msr1          | chr8:40667053-40728032          | 0.970576667 | 0           |
| Cd27          | chr6:125182639-125187045        | 0.969218    | 1.41912     |
| Tekt2         | chr4:125999364-126002443        | 0.969108667 | 14.12892667 |
| Cyb561d2      | chr9:107441341-107444196        | 0.968538667 | 3.95757     |
| Rtp3          | chr9:110887446-110892217        | 0.967903333 | 0           |
| Pik3ap1       | chr19:41348707-41459560         | 0.967891    | 0.534560333 |
| Kndc1         | chr7:147080594-147127439        | 0.967861    | 6.44367     |
| Crb2          | chr2:37631768-37654623          | 0.965312333 | 0.535523667 |
| Srpk3         | chrX:71019760-71024263          | 0.961784    | 1.565358    |
| Gal3st4       | chr5:138706152-138713982        | 0.961063933 | 2.102976667 |
| Cyp46a1       | chr12:109572590-109600444       | 0.960946667 | 1.818736667 |
| Ugt1a6b       | chr1:89999831-90115573          | 0.960723    | 6.46699     |
| Abcc6         | chr7:53231749-53285656          | 0.959846067 | 0           |
| 4930455C13Rik | chr10:21038893-21061861         | 0.959256667 | 2.531151    |
| Kdelc2        | chr9:53192127-53209972          | 0.959152333 | 4.405242333 |
| Gpr173        | chrX:148779188-148802654        | 0.9580353   | 1.598414    |
| Amy1          | chr3:113258869-113280668        | 0.957789333 | 3.7046      |
| Klhl25        | chr7:82993223-83019016          | 0.956321333 | 2.596618    |
| Rhox4c        | chrX:34894843-34899631          | 0.956122333 | 0.040536333 |
| Anln          | chr9:22135657-22193650          | 0.955321667 | 9.63678     |
| Dnm1          | chr2:32163990-32208824          | 0.955008    | 1.255811    |
| Lsp1          | chr7:149646774-149680504        | 0.954525667 | 0.286137667 |
| Rxfp3         | chr15:10963471-10967723         | 0.954090867 | 0.219487667 |
| Gm3086        | chr12:71064395-71070731         | 0.953016    | 4.593102667 |
| Kcnj16        | chr11:110829346-110889281       | 0.952783333 | 2.304273333 |
| Zfp383        | chr7:30693535-30701832          | 0.952610333 | 1.318720333 |
| Rdh5          | chr10:128350646-128356353       | 0.95157     | 0.430230667 |
| Sp110         | chr1:87473474-87500466          | 0.951070967 | 0           |
| Wdr72         | chr9:73958140-74131010          | 0.950752067 | 0.851973    |
| E330020D12Rik | chr1:155251315-155261363        | 0.9503236   | 3.0534919   |

|               |                           |             |             |
|---------------|---------------------------|-------------|-------------|
| 0610038L08Rik | chr17:29715760-29733250   | 0.950063667 | 1.819758333 |
| Dqx1          | chr6:83007837-83017213    | 0.948447    | 1.484273    |
| Gm572         | chr4:148017425-148045681  | 0.947709333 | 0.425011667 |
| Rhox4b        | chrX:34847000-34851785    | 0.947387    | 0           |
| Gpr4          | chr7:19797886-19809525    | 0.947233333 | 1.747614333 |
| Ifnb1         | chr4:88167928-88168698    | 0.94706     | 0           |
| 3110039I08Rik | chr9:41184643-41240162    | 0.945136667 | 0.06497     |
| Slc5a11       | chr7:130358379-130416765  | 0.943219433 | 0.031570733 |
| Ly86          | chr13:37437213-37510905   | 0.943206667 | 0           |
| Ankrd44       | chr1:54702183-54983231    | 0.942626333 | 3.260806667 |
| Smc2          | chr4:52452120-52501131    | 0.942450667 | 5.392393333 |
| Ccdc65        | chr15:98538657-98553764   | 0.941999667 | 1.187795533 |
| Kbtbd8        | chr6:95067899-95079781    | 0.941981667 | 0.557558667 |
| Ly6g5c        | chr17:35245244-35248898   | 0.941258333 | 4.961666667 |
| Foxo6         | chr4:119939682-119959866  | 0.941216333 | 4.476551    |
| Nmnat3        | chr9:98197001-98311847    | 0.940514667 | 1.100221667 |
| Nova1         | chr12:47795503-47919762   | 0.939290333 | 2.138622    |
| Cd72          | chr4:43460595-43467498    | 0.939063    | 5.523843333 |
| Asb14         | chr14:27707789-27728443   | 0.938935667 | 3.051921333 |
| Ankk1         | chr9:49223326-49235126    | 0.938753333 | 0           |
| Mro           | chr18:74019040-74038788   | 0.936938333 | 0           |
| Serpinb6b     | chr13:33057381-33070906   | 0.936607    | 18.51993333 |
| Psd           | chr19:46386576-46401646   | 0.936474667 | 4.173884333 |
| Adck3         | chr1:182095368-182126151  | 0.936339    | 1.839287667 |
| Ypel4         | chr2:84574360-84578034    | 0.935746667 | 0.714892667 |
| Armc6         | chr8:72744091-72758321    | 0.935578667 | 2.350906567 |
| Far2          | chr6:147995937-148131282  | 0.93508     | 3.71087     |
| Rab37         | chr11:114952744-115023554 | 0.934236333 | 18.96423333 |
| 2610018G03Rik | chrX:48194612-48245027    | 0.933006667 | 6.156753333 |
| Tnfrsf23      | chr7:150851711-150871777  | 0.931513667 | 0.948467633 |
| Megf6         | chr4:153544821-153649830  | 0.930517833 | 0.247638867 |
| Klrb1a        | chr6:128559244-128572952  | 0.93035     | 0           |
| Srrm4         | chr5:116889281-117041826  | 0.929758    | 1.824393333 |
| Ccdc24        | chr4:117541866-117545075  | 0.929610667 | 0.604020667 |
| Nacad         | chr11:6497825-6506057     | 0.929135333 | 1.701783    |
| Crabp1        | chr9:54612614-54620916    | 0.929086667 | 4.053453333 |
| Vash1         | chr12:88019649-88036631   | 0.927655667 | 0.996427    |
| Zbtb3         | chr19:8876985-8879344     | 0.926673333 | 0.747201333 |
| Ccdc42b       | chr5:121078343-121084244  | 0.926148667 | 0.853151667 |
| D730048J04Rik | chr17:43671122-43680588   | 0.925346333 | 0           |
| Smcr7         | chr11:60541899-60546453   | 0.924860333 | 1.6170597   |
| Fam83e        | chr7:52976589-52984862    | 0.924697667 | 2.150976    |
| Neu3          | chr7:106959948-106976927  | 0.922214333 | 0.333991667 |
| Dtwd2         | chr18:49855798-49915255   | 0.921540333 | 1.024225867 |
| Mfsd2a        | chr4:122624093-122638431  | 0.921010033 | 28.87966667 |
| Kif22         | chr7:134171244-134185934  | 0.921003667 | 2.117701    |
| Snph          | chr2:151416285-151458269  | 0.920838667 | 0.551230333 |
| Tas2r122      | chr6:132661016-132661946  | 0.920187667 | 0           |
| Ifi47         | chr11:48900556-48910473   | 0.919893333 | 0           |
| Chst10        | chr1:38920717-38955005    | 0.919294333 | 2.14622     |
| Gk5           | chr9:96019847-96083372    | 0.918735333 | 4.128906    |
| Csmid1        | chr8:15892544-17535385    | 0.917568667 | 0.251384333 |

|               |                           |             |             |
|---------------|---------------------------|-------------|-------------|
| 6330407A03Rik | chr4:3642110-3643953      | 0.917509    | 0.679806667 |
| Msrb3         | chr10:120218156-120336027 | 0.917315667 | 0.734597    |
| Bmp3          | chr5:99283457-99309979    | 0.915510333 | 0.1067474   |
| Gjc1          | chr11:102660791-102681000 | 0.914973333 | 0           |
| Fut4          | chr9:14552902-14556566    | 0.913928333 | 0.1576138   |
| Gpbar1        | chr1:74325173-74326163    | 0.913648333 | 0           |
| Gm7616        | chr9:59799100-59806851    | 0.913443    | 0.360652333 |
| 7530416G11Rik | chr15:85323165-85333657   | 0.913117    | 0.029535267 |
| Gpr18         | chr14:122310655-122314996 | 0.912886667 | 0.2496273   |
| 8430406I07Rik | chr2:144096770-144106965  | 0.912507333 | 1.580169    |
| Slc24a2       | chr4:86629029-86876444    | 0.911732    | 0           |
| Gspt2         | chrX:91881407-91883900    | 0.911650667 | 6.537467    |
| 4930549G23Rik | chr18:67935686-67959597   | 0.91162     | 0.099250333 |
| Olfr456       | chr6:42436161-42437213    | 0.910653667 | 6.70368     |
| 1700009P17Rik | chr1:173051791-173057098  | 0.910633333 | 1.943086667 |
| Fgf7          | chr2:125860393-125916921  | 0.909352667 | 0.44951     |
| Gpc6          | chr14:117324536-118378751 | 0.909308333 | 0.220019333 |
| Dnase1        | chr16:4037144-4040024     | 0.908682    | 1.389044333 |
| Tinagl1       | chr4:129842843-129852366  | 0.907505333 | 1.029255    |
| Ccdc68        | chr18:70085212-70129138   | 0.906488667 | 3.801443333 |
| Atp8b5        | chr4:43280030-43386703    | 0.905813333 | 0.278912667 |
| Espl1         | chr15:102126723-102154787 | 0.904927667 | 0.362019667 |
| Rin1          | chr19:5050807-5057071     | 0.903179667 | 0.250385333 |
| Itgb1bp3      | chr10:80660914-80664782   | 0.903003933 | 8.674802833 |
| Gm826         | chr2:160137136-160153230  | 0.902651333 | 0           |
| Trpm6         | chr19:18824472-18967001   | 0.901806    | 0.1065931   |
| Ttr           | chr18:20823750-20832827   | 0.899429667 | 0.321789333 |
| Ppfia3        | chr7:52594495-52622389    | 0.899183333 | 4.657133333 |
| 4930533B01Rik | chr2:113531209-113548707  | 0.898431333 | 2.141221667 |
| Serpina6c     | chr13:33971684-33997577   | 0.898338667 | 1.138214667 |
| Miox          | chr15:89164903-89167438   | 0.898206667 | 0           |
| Cacna1b       | chr2:24461894-24618672    | 0.8966866   | 2.078995    |
| Gm5662        | chr12:89509079-89512941   | 0.895498333 | 0.038742667 |
| Gm8909        | chr17:36301388-36305482   | 0.895406    | 0.790215    |
| Vmn2r83       | chr10:78931702-78954899   | 0.894134    | 0           |
| Haus8         | chr8:73775022-73796489    | 0.893840333 | 1.069109867 |
| Slc18a2       | chr19:59335367-59370502   | 0.892512    | 1.922756667 |
| Klk7          | chr7:51066813-51071729    | 0.891947333 | 0           |
| Plscr2        | chr9:92170439-92192590    | 0.891102667 | 0           |
| Tsga14        | chr6:30603456-30643682    | 0.889320833 | 0.519319333 |
| Atp6v0a4      | chr6:37998482-38074586    | 0.889233333 | 6.147939333 |
| Nptx2         | chr5:145306755-145318347  | 0.888216333 | 0.215926    |
| Chek2         | chr5:111269035-111303152  | 0.887909967 | 0.165437    |
| Muc13         | chr16:33794122-33820013   | 0.887628333 | 0.885068    |
| Pla2g10       | chr16:13715154-13730678   | 0.88559     | 0.207559333 |
| Grip1         | chr10:118891369-119512649 | 0.885056333 | 3.390683333 |
| Vwf           | chr6:125502980-125636695  | 0.884382667 | 2.534383333 |
| Spin4         | chrX:92217845-92222021    | 0.883928667 | 1.338082    |
| Gpr31c        | chr17:13244186-13245146   | 0.883366667 | 0           |
| 6330403A02Rik | chr1:182362503-182413635  | 0.882017633 | 6.892076667 |
| Ntrk2         | chr13:58907956-59231328   | 0.881988333 | 7.039783333 |
| D330012F22Rik | chr7:87377778-87386306    | 0.881446667 | 2.797815767 |

|                |                           |             |             |
|----------------|---------------------------|-------------|-------------|
| P2rx5          | chr11:72974031-72986189   | 0.881188667 | 0.163648833 |
| 1500015L24Rik  | chr19:20479777-20497275   | 0.880863333 | 3.759133333 |
| Adcy3          | chr12:4133396-4213524     | 0.879783333 | 1.763696694 |
| LOC629393      | chr11:85816159-85837852   | 0.879446667 | 0           |
| Hmgb1-rs17     | chr8:34594782-34596229    | 0.879028667 | 0.773444    |
| Pdgfc          | chr3:80840337-81017953    | 0.877224667 | 6.66643     |
| Frmpd1         | chr4:45197777-45298808    | 0.876791333 | 2.5691      |
| Slc23a1        | chr18:35774257-35786881   | 0.876747667 | 1.040475667 |
| Hsd17b1        | chr11:100939724-100941819 | 0.875446667 | 0.53281     |
| Slc6a20b       | chr9:123502937-123541683  | 0.874076    | 0.463367    |
| Pdyn           | chr2:129513736-129515604  | 0.87351     | 9.736273333 |
| G6pd2          | chr5:62200081-62201716    | 0.87231     | 1.372151333 |
| Alas2          | chrX:146981959-147005165  | 0.871247667 | 0.534792333 |
| Zfp593         | chr4:133799220-133801506  | 0.870585267 | 0.675959333 |
| 1700097N02Rik  | chr17:30759385-30763850   | 0.869960667 | 0.176962667 |
| Cdc25a         | chr9:109778082-109796394  | 0.868883    | 1.705478333 |
| Slco4a1        | chr2:180195682-180209557  | 0.868266667 | 2.146766667 |
| Sgol1          | chr17:53814111-53828640   | 0.867935    | 0.650495667 |
| Smyd5          | chr6:85381969-85396423    | 0.867832333 | 3.1814018   |
| Tcirg1         | chr19:3896049-3907133     | 0.866811    | 6.054616667 |
| Rell2          | chr18:38115212-38118833   | 0.866172333 | 0.86911     |
| Prodh          | chr16:18071818-18089283   | 0.86555     | 0.576134333 |
| Gpr146         | chr5:139856620-139872368  | 0.865153667 | 0           |
| Gbp8           | chr5:105443171-105482580  | 0.865141733 | 1.035397767 |
| F8             | chrX:72418055-72625380    | 0.865090333 | 2.027928    |
| Serpina3h      | chr12:105486105-105492615 | 0.864662    | 0.6308972   |
| Krt33b         | chr11:99884947-99891182   | 0.864606033 | 0.7568318   |
| 5730590G19Rik  | chr7:86805081-86843031    | 0.864389    | 0.902277    |
| Adamts13       | chr2:26828935-26865145    | 0.8623451   | 0.007697033 |
| Gm14446        | chr19:34667377-34676458   | 0.862045033 | 0.624755    |
| Colec12        | chr18:9707645-9877993     | 0.860994667 | 1.815137333 |
| Pcdhb2         | chr18:37454493-37457268   | 0.860583667 | 2.590646667 |
| Ncaph          | chr2:126929545-126959690  | 0.859496333 | 1.635197333 |
| Kcnab3         | chr11:69139759-69146543   | 0.859210333 | 0.1132574   |
| Rassf2         | chr2:131818585-131855724  | 0.85869     | 0           |
| Gm8883         | chr1:71934685-71937778    | 0.857126667 | 0           |
| Rhox4d         | chrX:34929041-34933682    | 0.857019667 | 0           |
| Tceal6         | chrX:131743224-131745226  | 0.856792    | 0.137396533 |
| Ogdhl          | chr14:33135204-33161006   | 0.856238367 | 0.725980333 |
| Casp14         | chr10:78174739-78181038   | 0.856028667 | 1.933189333 |
| Beta-s         | chr7:110975036-110976442  | 0.85602     | 0           |
| 9930111J21Rik1 | chr11:48759651-48792883   | 0.855873333 | 0           |
| Gm15413        | chr7:103939942-103950059  | 0.855759333 | 5.149526667 |
| Ifi204         | chr1:175677424-175697050  | 0.854973    | 0.218023    |
| Emilin2        | chr17:71601515-71660305   | 0.8537325   | 0.975854667 |
| 5930412G12Rik  | chr5:129085004-129106562  | 0.853606667 | 0.790043333 |
| Gyk            | chrX:82947275-83022158    | 0.853126    | 1.92909     |
| Susd1          | chr4:59327554-59451505    | 0.8531012   | 4.565166667 |
| Gatsl3         | chr11:4118253-4122412     | 0.852858667 | 0.5741405   |
| Gm13212        | chr4:145207048-145214297  | 0.852191    | 0.356650667 |
| Col15a1        | chr4:47220883-47326037    | 0.85197     | 0.41627     |
| 5830428M24Rik  | chr12:70565773-70576537   | 0.851388333 | 0.641478333 |

|               |                          |             |             |
|---------------|--------------------------|-------------|-------------|
| Scnn1g        | chr7:128878020-128911991 | 0.849081333 | 1.265846667 |
| B630019K06Rik | chrX:8469478-8472090     | 0.848387333 | 2.593388367 |
| Zfp964        | chr8:72178454-72188352   | 0.845786667 | 0.732045    |
| Rarres2       | chr6:48519696-48522669   | 0.845065333 | 7.39E-119   |
| 4930538K18Rik | chr4:118877659-118890822 | 0.844988    | 0.065113333 |
| Rhox4e        | chrX:34971918-34976789   | 0.843217333 | 0           |
| Dcst1         | chr3:89154156-89169161   | 0.842746333 | 0.0773727   |
| Slc27a3       | chr3:90189154-90193849   | 0.842716333 | 0.7987688   |
| Dph1          | chr11:74991144-75003985  | 0.842645    | 0.021225842 |
| 1700029G01Rik | chr4:125827845-125840585 | 0.842598667 | 0.604604    |
| Gm13718       | chr2:84499235-84508938   | 0.84036     | 0.027129667 |
| Slco4c1       | chr1:98715360-98768748   | 0.8401295   | 4.502391667 |
| Cldn20        | chr17:3532553-3533213    | 0.839615667 | 2.992473333 |
| Inpp5d        | chr1:89516886-89617083   | 0.839220333 | 0.009364467 |
| Aqp5          | chr15:99421458-99425260  | 0.839203333 | 4.2306      |
| Il1b          | chr2:129190315-129196856 | 0.838663333 | 0.85492     |
| Oaf           | chr9:43029360-43047899   | 0.836758333 | 0           |
| Rab11fip5     | chr6:85284955-85324628   | 0.835453333 | 2.148500667 |
| Ftsjd1        | chr8:112741859-112748389 | 0.8343      | 1.3177311   |
| Gm8050        | chr14:6452626-6457325    | 0.8333679   | 1.053527    |
| 4930478L05Rik | chr16:78560560-78565114  | 0.833166667 | 1.138455667 |
| Crxos1        | chr7:16467965-16489379   | 0.832713333 | 0           |
| Tmem47        | chrX:78315982-78343214   | 0.831534667 | 1.144003    |
| 2010005H15Rik | chr16:36221647-36257513  | 0.831236667 | 1.058736667 |
| 5730416F02Rik | chrX:106196823-106197635 | 0.831086667 | 0.304070667 |
| Pla2g4a       | chr1:151676751-151808414 | 0.829698    | 2.567611333 |
| Mfsd6l        | chr11:68369687-68371747  | 0.829383    | 0.618730667 |
| Fbxo27        | chr7:29477867-29484356   | 0.82916     | 0           |
| Ovgp1         | chr3:105776719-105790341 | 0.828912667 | 1.550440667 |
| Ptgs2         | chr1:151947253-151955142 | 0.828900333 | 5.504160867 |
| Rasgrp1       | chr2:117105728-117168613 | 0.828230333 | 1.872814667 |
| Zmynd15       | chr11:70273123-70279701  | 0.827929367 | 0.322778067 |
| Wdr95         | chr5:150331253-150414469 | 0.8274935   | 0.407354    |
| Egfl6         | chrX:162960938-163023648 | 0.826553667 | 7.236173333 |
| Nat14         | chr7:4873852-4876608     | 0.8263953   | 0.278160333 |
| 4930467D21Rik | chr5:97821435-98017145   | 0.825287967 | 0.024156133 |
| 2010310C07Rik | chr6:42320669-42330557   | 0.824675667 | 1.901869333 |
| Pla2g3        | chr11:3388229-3394169    | 0.824652567 | 2.782376667 |
| AV051173      | chr4:116357569-116358627 | 0.82453     | 0           |
| Lrrc19        | chr4:94303350-94316835   | 0.824388333 | 0.243215033 |
| Serpind1      | chr16:17331463-17343665  | 0.823846333 | 0.664329667 |
| Bsn           | chr9:107998352-108092714 | 0.823768    | 1.825666    |
| Dnahc7b       | chr1:46123582-46430395   | 0.823755    | 2.210616667 |
| Phldb1        | chr9:44494390-44543281   | 0.822908667 | 1.89173     |
| Kcnj9         | chr1:174251163-174259394 | 0.822148667 | 0.889540333 |
| Cyb5rl        | chr4:106742772-106757410 | 0.821273    | 0.34602     |
| Lrrc46        | chr11:96895915-96902683  | 0.821062333 | 0.619563333 |
| 2010015L04Rik | chr4:154783298-154817219 | 0.820867    | 1.094716333 |
| Acot10        | chr15:20594968-20596505  | 0.820716667 | 2.598741333 |
| Lypd2         | chr15:74562681-74564743  | 0.820671    | 26.8149     |
| Slc41a3       | chr6:90554873-90596406   | 0.819474667 | 4.14188     |
| Rcor2         | chr19:7344253-7349715    | 0.817473333 | 10.46105133 |



|               |                           |             |             |
|---------------|---------------------------|-------------|-------------|
| Otop2         | chr11:115168476-115193617 | 0.817392333 | 3.954933333 |
| Laptm5        | chr4:130469248-130492063  | 0.817004    | 1.438210867 |
| Accn2         | chr15:99501148-99531559   | 0.816986667 | 1.82436     |
| Mis18bp1      | chr12:66233720-66273567   | 0.81676     | 2.694845    |
| Cilp          | chr9:65112986-65128412    | 0.816605    | 0           |
| C3ar1         | chr6:122797157-122806175  | 0.815383333 | 0.097502    |
| Ubl4b         | chr3:107356615-107357991  | 0.814956667 | 8.102643333 |
| H2-Q7         | chr17:35576099-35580718   | 0.8146644   | 0.904477    |
| Epb4.2        | chr2:120843952-120862491  | 0.8146293   | 0.094694667 |
| Gbp10         | chr5:105644717-105668552  | 0.81375     | 1.382943667 |
| Zfp189        | chr4:49534088-49544417    | 0.813174333 | 1.393637    |
| Spns2         | chr11:72265139-72303406   | 0.812883667 | 6.099446667 |
| Gngt1         | chr6:3944011-3947436      | 0.812556667 | 0.79162     |
| Lims2         | chr18:32091160-32118273   | 0.811975667 | 0           |
| 5730480H06Rik | chr5:48786811-48805533    | 0.811366333 | 6.601693333 |
| Gprc5a        | chr6:135015679-135034726  | 0.811346267 | 2.26574     |
| 4933412E12Rik | chr10:116387617-116400335 | 0.810917333 | 6.108036667 |
| Gpr113        | chr5:30519970-30532262    | 0.810813    | 49.4788     |
| Ttc21a        | chr9:119846723-119876911  | 0.810368333 | 0.650028333 |
| Tlx1          | chr19:45225204-45231433   | 0.810191667 | 8.59176     |
| Gm12298       | chr11:66719133-66760588   | 0.809577333 | 0.055166333 |
| Ccl3          | chr11:83461344-83462880   | 0.808713333 | 0           |
| Cdca2         | chr14:68294410-68333898   | 0.808453    | 0.134416    |
| Rasa3         | chr8:13567217-13677587    | 0.808201333 | 2.722105    |
| Ccdc79        | chr8:106970618-107033787  | 0.808096533 | 1.00922     |
| Rap1gap2      | chr11:74196984-74403660   | 0.807179333 | 7.20868     |
| Pard6a        | chr8:108225053-108227394  | 0.80354     | 1.596140333 |
| Abcb6         | chr1:75168214-75176857    | 0.80286     | 3.79135     |
| Tacr3         | chr3:134491970-134597545  | 0.802426667 | 0.430673767 |
| Bend5         | chr4:111087610-111132903  | 0.801714667 | 4.206507    |
| Cbs           | chr17:31749588-31774086   | 0.801698667 | 2.28926     |
| Fcgr1         | chr3:96086831-96097892    | 0.800035    | 0.450641667 |
| Gm5434        | chr12:36816965-36818416   | 0.799727    | 1.441498    |
| Gm13315       | chr2:14642268-14644249    | 0.798503    | 1.547955    |
| BC100451      | chr11:118193673-118203848 | 0.798355667 | 0.342656667 |
| Nudt19        | chr7:36332203-36340947    | 0.798344667 | 5.120196667 |
| Usp27x        | chrX:6949716-6952956      | 0.797980333 | 1.6896307   |
| Zcchc18       | chrX:133527693-133531462  | 0.797307667 | 4.86757     |
| Asb2          | chr12:104559351-104594211 | 0.796778    | 0           |
| Ccdc19        | chr1:174451260-174476001  | 0.79617     | 2.642902    |
| Mkl           | chr8:113835699-113861803  | 0.796153333 | 0           |
| Gsdmcl-ps     | chr15:63746015-63757008   | 0.796033333 | 0.6577712   |
| 9530077C05Rik | chr9:22216020-22249123    | 0.795903333 | 0           |
| Klhl35        | chr7:106614513-106622530  | 0.795840333 | 0.685497    |
| Cyp27b1       | chr10:126485301-126490062 | 0.795840333 | 0           |
| Tmem144       | chr3:79617074-79646584    | 0.795194667 | 2.266473333 |
| Cetn4         | chr3:37207548-37211368    | 0.794921333 | 3.273528667 |
| AF366264      | chr8:13835230-13838089    | 0.794116333 | 0           |
| Rem2          | chr14:55094936-55099271   | 0.793797333 | 1.44243     |
| Gm10548       | chr18:34367428-34381426   | 0.793736333 | 0.268881333 |
| Fanci         | chr7:86537223-86595150    | 0.793628367 | 0.828055    |
| Mmd           | chr11:90110789-90139887   | 0.792651667 | 0.2713254   |

|               |                           |             |             |
|---------------|---------------------------|-------------|-------------|
| Wipf1         | chr2:73267673-73367467    | 0.792435    | 0.117088267 |
| Gm1123        | chr9:98907383-98936109    | 0.792113333 | 0           |
| Sox5          | chr6:143776944-144158088  | 0.791834067 | 1.0584691   |
| Pkd2l1        | chr19:44222126-44266932   | 0.791698667 | 1.077755333 |
| Fscn3         | chr6:28377900-28388622    | 0.79137     | 0           |
| Fmn13         | chr15:99147653-99200897   | 0.791367767 | 0.831327167 |
| Cenpf         | chr1:191464492-191511965  | 0.789540333 | 8.72962     |
| 4930562F07Rik | chr1:162004865-162008116  | 0.788800078 | 8.38E-08    |
| Ell3          | chr2:121264762-121268337  | 0.787953    | 8.471781    |
| BC125332      | chr2:112088104-112099448  | 0.787400667 | 0.041454367 |
| Gm106         | chr1:15843942-15882803    | 0.784665067 | 0.539500333 |
| Hs3st6        | chr17:24889947-24895629   | 0.784519667 | 10.41145    |
| Tmem100       | chr11:89891661-89897819   | 0.7845      | 0.393087667 |
| Ppapdc1a      | chr7:136400607-136534821  | 0.783386667 | 0           |
| Spink8        | chr9:109719140-109729141  | 0.782963333 | 0           |
| Urm1          | chr2:29682908-29700516    | 0.782805567 | 2.762316667 |
| Olfr1410      | chr1:94504415-94505384    | 0.782683333 | 0           |
| Zfp334        | chr2:165202935-165213759  | 0.781119867 | 1.800595333 |
| Mcart6        | chrX:133515654-133572841  | 0.780835467 | 1.567252667 |
| Mxra7         | chr11:116664713-116689360 | 0.780636667 | 0.722966667 |
| Olfm2         | chr9:20472429-20532658    | 0.780388333 | 1.87115     |
| Zfp365        | chr10:67348852-67375410   | 0.780085333 | 1.732099933 |
| Fhl4          | chr10:84559763-84565240   | 0.779017    | 2.045407333 |
| C1qtnf3       | chr15:10882086-10909917   | 0.7773328   | 0           |
| Slc19a1       | chr10:76495483-76513177   | 0.7769226   | 6.693823333 |
| Sord          | chr2:122060574-122091073  | 0.776528667 | 1.875166667 |
| Cspg5         | chr9:110146286-110165080  | 0.776055    | 0.483681    |
| Zfp354b       | chr11:50735287-50745137   | 0.774887667 | 2.004015    |
| Morn3         | chr5:123487135-123496829  | 0.773924667 | 0.31343     |
| Cenpn         | chr8:119445639-119465403  | 0.77384     | 3.21872     |
| Fez1          | chr9:36651243-36686225    | 0.771666667 | 2.419516333 |
| Creb3l1       | chr2:91822484-91864327    | 0.771142    | 5.245783333 |
| Dcdc2c        | chr12:29122659-29233202   | 0.771102333 | 0.42516     |
| Rdh9          | chr10:127213460-127229753 | 0.770326667 | 0.608403333 |
| Cys1          | chr12:25350702-25366660   | 0.770241    | 0.607395    |
| Gm3716        | chr5:64985101-65001938    | 0.769630333 | 1.281456667 |
| Adcy4         | chr14:56387928-56402856   | 0.769295333 | 0.010561033 |
| Armcx2        | chrX:131338680-131343760  | 0.768856667 | 1.558700333 |
| B930018H19    | chr8:35652473-35703370    | 0.76822     | 0.052808667 |
| Fam132b       | chr1:93263006-93270794    | 0.767034433 | 1.283556667 |
| Eif5a2        | chr3:28680232-28697768    | 0.766854    | 0.643929    |
| Fli1          | chr9:32229792-32348953    | 0.76631     | 0           |
| Zfp85-rs1     | chr13:67848736-67856071   | 0.765800667 | 2.760626333 |
| Aldh1a7       | chr19:20767442-20802046   | 0.765483233 | 3.2573      |
| Gm14327       | chr2:177631867-177662555  | 0.765353    | 0.266866    |
| 4921530D09Rik | chr2:25464148-25473198    | 0.764158967 | 0.318406    |
| Aifm2         | chr10:61178010-61202008   | 0.763985009 | 3.67593     |
| Syna          | chr5:135033123-135036041  | 0.763784333 | 0.622196667 |
| Syn1          | chrX:20437636-20498044    | 0.763542    | 1.4646      |
| Adcy1         | chr11:6963491-7078508     | 0.763405    | 1.513120667 |
| Gpr37l1       | chr1:137056826-137064258  | 0.763065167 | 0.151205333 |
| Chit1         | chr1:136007818-136048013  | 0.762536867 | 25.39466333 |

|                |                           |             |             |
|----------------|---------------------------|-------------|-------------|
| Osbp10         | chr9:114976396-115141341  | 0.762272    | 0.596774667 |
| Cerkl          | chr2:79172647-79269145    | 0.762053333 | 0.108783667 |
| Hpd1           | chr4:116492511-116494113  | 0.76174     | 0           |
| Myog           | chr1:136186580-136189125  | 0.761374333 | 0.0221147   |
| C920006O11Rik  | chr9:78023720-78026689    | 0.761352333 | 1.708246    |
| Acacb          | chr5:114615526-114700767  | 0.760949333 | 1.894170333 |
| Gm2016         | chr12:89112519-89116307   | 0.758940667 | 0.009024533 |
| Ighmbp2        | chr19:3259075-3283010     | 0.758548667 | 5.335822667 |
| Gm15706        | chr6:145199071-145200376  | 0.758407333 | 1.294216667 |
| Gm1673         | chr5:34326122-34327655    | 0.758113333 | 1.205016667 |
| Wdr69          | chr1:83156336-83207147    | 0.757854667 | 0           |
| Amica1         | chr9:44887265-44916614    | 0.75766     | 0.182906233 |
| Angptl2        | chr2:33071480-33103234    | 0.757026333 | 3.37057     |
| Gm10658        | chr9:56904703-56919773    | 0.756876667 | 2.41545     |
| Baiap3         | chr17:25379603-25393309   | 0.756544333 | 6.246436667 |
| Ahsg           | chr16:22892114-22899511   | 0.756027    | 0.2824916   |
| Fgf20          | chr8:41364519-41372307    | 0.755818667 | 0           |
| Arhgap22       | chr14:34030008-34183122   | 0.755575333 | 0.280811133 |
| Fam163b        | chr2:26965898-26997997    | 0.75538     | 1.31708     |
| Gm14872        | chr17:47824558-47828041   | 0.755341467 | 1.172308433 |
| Reep1          | chr6:71657674-71760699    | 0.755066333 | 6.863809667 |
| Wdr86          | chr5:24218086-24236498    | 0.75371     | 0.231659333 |
| Zkscan4        | chr13:21570717-21577374   | 0.753581667 | 1.699873667 |
| Tomt           | chr7:109048321-109054873  | 0.753527    | 1.460672    |
| Ooep           | chr9:78224709-78226395    | 0.752566667 | 0           |
| Zwilch         | chr9:63984950-64020738    | 0.751717333 | 0.3809493   |
| 1700054N08Rik  | chr8:126364743-126384109  | 0.7512389   | 1.925185333 |
| Syde2          | chr3:145650833-145684684  | 0.751186    | 1.36133     |
| Unc5a          | chr13:55050792-55107379   | 0.750727667 | 0.653467333 |
| Dclk1          | chr3:55046447-55342990    | 0.750426    | 0.68024     |
| Foxred2        | chr15:77770951-77787152   | 0.750417    | 5.515426667 |
| Dpyd           | chr3:118265095-119135836  | 0.750345667 | 0.582709667 |
| Kif26a         | chr12:113384418-113419958 | 0.7499906   | 0.541431833 |
| Gm996          | chr2:25430935-25435619    | 0.748830333 | 0.964340333 |
| Crybb3         | chr5:113504858-113510604  | 0.748047667 | 4.689966667 |
| Wnt3           | chr11:103635488-103679335 | 0.747056133 | 0.601766    |
| Slc26a1        | chr5:109099565-109104668  | 0.7470371   | 0.0141268   |
| Meis2          | chr2:115686999-115890794  | 0.745909    | 1.871441667 |
| 5730420D15Rik  | chr10:94880008-94891274   | 0.745864333 | 0           |
| Fchsd1         | chr18:38117087-38129385   | 0.744701867 | 0.890661667 |
| Anks6          | chr4:47028560-47070178    | 0.743254667 | 1.723698    |
| 9930111J21Rik2 | chr11:48851161-48864744   | 0.743163333 | 0           |
| Cxcr4          | chr1:130484775-130488876  | 0.743129    | 0.140070667 |
| Gm12522        | chr3:108182194-108186659  | 0.743070333 | 0.145927467 |
| Dennd2c        | chr3:102931478-102973656  | 0.743057    | 4.21461     |
| Rbpjl          | chr2:164228693-164240948  | 0.741923333 | 1.932166667 |
| Slc23a3        | chr1:75122115-75130464    | 0.741425967 | 0.6170898   |
| 4931431C16Rik  | chr5:35923875-35931412    | 0.740746333 | 0.354006667 |
| 9530048J24Rik  | chr11:85580334-85589182   | 0.739447667 | 0.727150667 |
| Rimbp3         | chr16:17208227-17214075   | 0.738918633 | 1.811128    |
| A630071L07Rik  | chr2:33661335-33669111    | 0.738613533 | 2.774916667 |
| Rhox4g         | chrX:35061007-35065834    | 0.737287    | 0.012192    |

|               |                          |             |             |
|---------------|--------------------------|-------------|-------------|
| 1700003E16Rik | chr6:83106397-83112969   | 0.736553667 | 1.465058    |
| Rad54l        | chr4:115769559-115796295 | 0.736145667 | 0.381255333 |
| Ncam2         | chr16:81200941-81624532  | 0.735667333 | 0.634343333 |
| Gm16675       | chr8:47816323-47824869   | 0.735523333 | 0.835763333 |
| Itga11        | chr9:62525661-62631786   | 0.734476    | 0.064041    |
| Fbxo41        | chr6:85419571-85452880   | 0.734368467 | 0.188364333 |
| Sirpa         | chr2:129418574-129457964 | 0.733893    | 3.304655    |
| AY512931      | chr8:46146055-46150772   | 0.733207067 | 2.590713    |
| Aurka         | chr2:172181695-172196006 | 0.732904333 | 2.293029667 |
| Gm20556       | chr15:84545058-84550696  | 0.732761333 | 0.041572    |
| Esam          | chr9:37335673-37345904   | 0.732594667 | 0.403424667 |
| Tarsl2        | chr7:72789783-72836979   | 0.732565333 | 2.51343     |
| Arsk          | chr13:76197869-76236108  | 0.73187     | 5.116846667 |
| Serpinb1b     | chr13:33175971-33186249  | 0.7318335   | 9.527763333 |
| Gfod2         | chr8:108240012-108282507 | 0.7317673   | 1.033623    |
| S1pr2         | chr9:20770395-20781237   | 0.730275    | 3.87008     |
| E030018B13Rik | chr7:71061742-71065425   | 0.729906667 | 0.585166667 |
| Metrn         | chr17:25931515-25933990  | 0.729720333 | 0.969031    |
| Cd200         | chr16:45382247-45409166  | 0.729590133 | 4.491066667 |
| Hcn3          | chr3:88950696-88964079   | 0.728723167 | 0.349636667 |
| Lrrc2         | chr9:110854048-110886568 | 0.728333    | 0.827059667 |
| Slc26a6       | chr9:108756373-108815380 | 0.726067333 | 0.550627    |
| Muc20         | chr16:32777504-32797521  | 0.725701    | 2.11537     |
| Fstl1         | chr16:37777140-37836602  | 0.725293    | 0.069361767 |
| Il1r2         | chr1:40141612-40182070   | 0.725184    | 1.685151667 |
| Gm15880       | chr7:87780902-87789270   | 0.72472     | 3.234143333 |
| Nme4          | chr17:26228689-26232415  | 0.724597333 | 2.846473333 |
| 9030624G23Rik | chr12:24728066-24782134  | 0.722712433 | 1.123515667 |
| Ceacam16      | chr7:20437445-20446648   | 0.722023667 | 0           |
| Acy1          | chr9:106335326-106340567 | 0.721447    | 0.662443333 |
| Cstad         | chr2:30450563-30464465   | 0.721206667 | 1.912894    |
| Styk1         | chr6:131249161-131263845 | 0.7208083   | 0.104519333 |
| Ubd           | chr17:37330836-37333046  | 0.720766667 | 0           |
| Dctd          | chr8:49184445-49227021   | 0.720437467 | 1.122113667 |
| Lbx2          | chr6:83036358-83038235   | 0.719443333 | 0           |
| Gjb6          | chr14:57742139-57752414  | 0.717716333 | 5.479313333 |
| Lat           | chr7:133507341-133513048 | 0.716936667 | 1.047136667 |
| Cyp4a12a      | chr4:114971650-115005420 | 0.7164074   | 3.338933333 |
| Plp1          | chrX:133357374-133372281 | 0.716021667 | 0.315084    |
| Gm14379       | chrX:6953050-6955168     | 0.715912667 | 0           |
| Itpripl1      | chr2:126964504-126969193 | 0.715821333 | 1.449536    |
| Timp1         | chrX:20447291-20451863   | 0.714911667 | 0           |
| 4930550C14Rik | chr9:53213390-53240908   | 0.714843333 | 0.4726286   |
| Eepd1         | chr9:25289181-25411695   | 0.714256667 | 1.037907    |
| Art4          | chr6:136796971-136806121 | 0.712786667 | 0           |
| Slc12a5       | chr2:164793487-164825231 | 0.711769333 | 0.157288333 |
| Plxnd1        | chr6:115904828-115945023 | 0.711200667 | 3.196433333 |
| Pspn          | chr17:57138879-57139441  | 0.711163333 | 0.468089333 |
| Tmem8b        | chr4:43681842-43705539   | 0.711154333 | 1.227679333 |
| Col10a1       | chr10:34109786-34116891  | 0.710790667 | 1.070272333 |
| Lpar2         | chr8:72346463-72355001   | 0.710224667 | 0.658043133 |
| Tm7sf4        | chr15:39577477-39592480  | 0.710033333 | 0           |

|               |                           |             |             |
|---------------|---------------------------|-------------|-------------|
| A930007I19Rik | chr19:29578152-29596477   | 0.709705733 | 0.736058333 |
| 5430405G05Rik | chr2:151527743-151533046  | 0.708388    | 0.027463167 |
| Dlgap5        | chr14:48007453-48038082   | 0.707755733 | 0.3566917   |
| Tcte3         | chr17:15164117-15178523   | 0.707114667 | 0.703145333 |
| Fabp6         | chr11:43409613-43415013   | 0.70691     | 0           |
| Zfp457        | chr13:67393386-67407348   | 0.706617667 | 0.324540667 |
| Col8a1        | chr16:57624368-57754850   | 0.706191133 | 2.579695    |
| Gm11240       | chr4:73437147-73444282    | 0.705599333 | 2.548696667 |
| Gm3604        | chr13:62469075-62484534   | 0.704425333 | 0.244573667 |
| ltga2b        | chr11:102314610-102331197 | 0.7025095   | 0.2270142   |
| Spdya         | chr17:71901400-71938873   | 0.702484    | 3.21E-28    |
| Ccl1          | chr11:81990167-81993314   | 0.700963333 | 0           |
| Dpf3          | chr12:84370184-84828658   | 0.700325    | 3.623505667 |
| Calca         | chr7:121774991-121779871  | 0.699625    | 29.57663333 |
| Mmp12         | chr9:7347373-7360461      | 0.699273333 | 0           |
| St3gal3       | chr4:117604757-117807519  | 0.698582333 | 1.067143333 |
| Vwc2l         | chr1:70772288-70931971    | 0.69718     | 0           |
| Efemp1        | chr11:28753204-28826743   | 0.697045333 | 3.22504     |
| Ssxb2         | chrX:8031468-8038852      | 0.696791667 | 0.0992497   |
| Npr2          | chr4:43644806-43664112    | 0.69658     | 3.496803333 |
| Syt9          | chr7:114514303-114692169  | 0.6960513   | 3.593806667 |
| Zfp92         | chrX:70656441-70672326    | 0.695479333 | 2.7378607   |
| Ppp2r2b       | chr18:42804922-43219125   | 0.69472     | 0           |
| Efna5         | chr17:62952305-63230666   | 0.694288667 | 4.778073333 |
| Aspm          | chr1:141351349-141390665  | 0.693893667 | 2.559454    |
| Cd109         | chr9:78463352-78564067    | 0.693758333 | 10.93659    |
| Rpgrip1       | chr14:52730577-52781014   | 0.692387    | 0.0763698   |
| Hspg2         | chr4:137024717-137126545  | 0.691627    | 1.372823333 |
| Pask          | chr1:95206013-95239365    | 0.691553    | 0.735977833 |
| Ticam2        | chr18:46717884-46734187   | 0.691311    | 0.5737282   |
| Vaultrc5      | chr18:36961416-36961761   | 0.691103333 | 3.72098     |
| Prtg          | chr9:72655080-72765114    | 0.69098     | 1.395823333 |
| Syt7          | chr19:10463579-10527671   | 0.690780333 | 0.677782    |
| lfitm5        | chr7:148134860-148136138  | 0.689386667 | 0.168918333 |
| Slc7a10       | chr7:35971403-35986130    | 0.689305    | 0.368031    |
| 1700001J03Rik | chr5:146994025-146996880  | 0.688182333 | 0           |
| Cmya5         | chr13:93810669-93914679   | 0.6870617   | 0.004434533 |
| Adamts17      | chr7:73984620-74297511    | 0.685135    | 3.027106667 |
| Pglyrp4       | chr3:90530827-90545439    | 0.68257     | 0.188816333 |
| Dgkb          | chr12:38607291-39359997   | 0.681626133 | 5.684763333 |
| Lck           | chr4:129225587-129250885  | 0.681335333 | 0.072186    |
| Slc17a9       | chr2:180460043-180476983  | 0.681335    | 0.889793333 |
| 1700016C15Rik | chr1:179659944-179683436  | 0.681216667 | 2.041496667 |
| Myh11         | chr16:14194619-14291501   | 0.680815567 | 1.077132    |
| Mms22l        | chr4:24423608-24530095    | 0.680269    | 0.702787667 |
| Pros1         | chr16:62854159-62929166   | 0.680197733 | 2.577516667 |
| Pom121l2      | chr13:22073049-22080603   | 0.680143333 | 0           |
| Acot1         | chr12:85350451-85358619   | 0.680001667 | 4.556153333 |
| Shisa3        | chr5:67999121-68005226    | 0.679547333 | 0.69777     |
| Syng3         | chr17:24822036-24826894   | 0.679146667 | 0.0192337   |
| Gfpt2         | chr11:49607656-49652122   | 0.678881    | 5.155073333 |
| Gemin6        | chr17:80623828-80627837   | 0.678106667 | 1.333345667 |

|               |                           |             |             |
|---------------|---------------------------|-------------|-------------|
| Flrt2         | chr12:96930435-97023423   | 0.6764328   | 2.08413     |
| Gm3448        | chr17:15101152-15115776   | 0.676346533 | 0.514077667 |
| Clec5a        | chr6:40524896-40535804    | 0.674737    | 0.102933667 |
| Gm5136        | chr10:108136099-108137216 | 0.673953333 | 0           |
| Fam46b        | chr4:133036047-133043855  | 0.673785333 | 6.008173333 |
| B4galnt3      | chr6:120153827-120244577  | 0.672898067 | 1.557823667 |
| Polq          | chr16:37011871-37095503   | 0.672601333 | 0.364887667 |
| Speer4b       | chr5:27822348-27827932    | 0.672226667 | 0           |
| Lrriq3        | chr3:154756397-154857242  | 0.671587333 | 1.562837667 |
| Krt34         | chr11:99898664-99902868   | 0.671566    | 0.153658967 |
| Tshb          | chr3:102581320-102586637  | 0.671473333 | 0.097016    |
| Ccdc103       | chr11:102742557-102746529 | 0.670819667 | 0.109472467 |
| Slc2a4        | chr11:69755787-69761692   | 0.670681    | 0           |
| Kcnn4         | chr7:25155281-25170231    | 0.670055333 | 0           |
| Coro6         | chr11:77277414-77283003   | 0.669758333 | 3.63518     |
| Angptl6       | chr9:20678252-20684154    | 0.669623333 | 0.436830667 |
| Syt15         | chr14:35033231-35043607   | 0.668666667 | 0.254909333 |
| Smoc1         | chr12:82127794-82287401   | 0.668615333 | 0.010339233 |
| Rhobtb1       | chr10:68671299-68754532   | 0.667632    | 1.054137333 |
| 7420701I03Rik | chr12:11054618-11085547   | 0.666967333 | 0           |
| Tgtp1         | chr11:48798830-48805748   | 0.66632621  | 0           |
| Jam3          | chr9:26904968-26963006    | 0.666228667 | 1.314757    |
| Krt86         | chr15:101303908-101310414 | 0.664847667 | 5.7736453   |
| Maneal        | chr4:124532482-124539415  | 0.664740667 | 0.896416667 |
| D630032N06Rik | chr11:85048667-85051806   | 0.664243333 | 0.261392    |
| Me3           | chr7:96781327-97002869    | 0.663804667 | 1.019151667 |
| Gdf11         | chr10:128321601-128328774 | 0.662954    | 2.37412     |
| Tcp11         | chr17:28203691-28217584   | 0.6629431   | 2.014820333 |
| Sh2d4b        | chr14:41629156-41706254   | 0.662265333 | 0.315468633 |
| Usp13         | chr3:32716547-32834179    | 0.662248033 | 0.243396667 |
| Gm606         | chr16:26957320-26990060   | 0.662135533 | 0.094687    |
| 1810024B03Rik | chr2:127012090-127034016  | 0.662026667 | 0           |
| Lipg          | chr18:75098975-75120917   | 0.660722    | 1.647614    |
| Htr2b         | chr1:87995611-88008545    | 0.660599333 | 2.302035667 |
| C1qtnf4       | chr2:90725942-90730683    | 0.659086    | 0.432373    |
| Acer2         | chr4:86520317-86566785    | 0.658928    | 2.677849333 |
| Glyatl3       | chr17:41041689-41051299   | 0.658646667 | 0.216485667 |
| Sema6d        | chr2:124436031-124493506  | 0.658379667 | 2.204811    |
| 1700029F09Rik | chr1:44143461-44159233    | 0.657539333 | 1.723648333 |
| Jakmip2       | chr18:43691061-43847427   | 0.657143067 | 0.497711667 |
| Cdo1          | chr18:46872858-46887996   | 0.656299333 | 8.930963333 |
| Krt12         | chr11:99276977-99283573   | 0.653695667 | 0           |
| Mpeg1         | chr19:12535268-12539775   | 0.653604667 | 0.074863667 |
| 2900009J06Rik | chr1:129650193-129670631  | 0.653524667 | 0.167771    |
| Ldlrad1       | chr4:106881784-106890519  | 0.653185333 | 0.038115    |
| Map3k15       | chrX:156426364-156561283  | 0.652839    | 8.34163     |
| Odf3b         | chr15:89207879-89209685   | 0.652715667 | 7.093853333 |
| Bai1          | chr15:74346625-74419894   | 0.6526194   | 0.307603667 |
| Tyro3         | chr2:119625249-119643839  | 0.652523    | 2.916965667 |
| Slc4a3        | chr1:75542840-75556006    | 0.652242333 | 1.803422    |
| Arhgap29      | chr3:121656243-121719071  | 0.651444667 | 6.254546667 |
| Kcnip2        | chr19:45868159-45890293   | 0.64851     | 0           |

|               |                           |             |             |
|---------------|---------------------------|-------------|-------------|
| 1200009I06Rik | chr12:112655640-112669394 | 0.648362333 | 0           |
| Il18r1        | chr1:40522396-40557699    | 0.647034267 | 1.771349667 |
| Zfp558        | chr9:18258497-18278003    | 0.646502333 | 1.13809     |
| Ccr10         | chr11:101034311-101036757 | 0.646403333 | 0.46344     |
| Aldob         | chr4:49548866-49562355    | 0.645616667 | 0           |
| Phldb2        | chr16:45746343-45844491   | 0.645578333 | 0.678675333 |
| 4933406M09Rik | chr1:136282516-136287560  | 0.644673667 | 0           |
| Gm16853       | chr9:21209685-21216164    | 0.643910333 | 2.008467167 |
| Cldn15        | chr5:137443738-137451715  | 0.6438347   | 8.213663    |
| C1qtnf5       | chr9:43909852-43917270    | 0.643693333 | 2.057830333 |
| Dmd           | chrX:80194208-82450389    | 0.643669667 | 0.612409667 |
| Foxc1         | chr13:31898514-31902504   | 0.643157    | 0.207765667 |
| Dgkg          | chr16:22466641-22657304   | 0.643094667 | 1.57086     |
| Ccdc85c       | chr12:109444554-109513627 | 0.642843167 | 3.775404333 |
| 9230110C19Rik | chr9:8021671-8042823      | 0.6423228   | 1.121732533 |
| P2rx7         | chr5:123093919-123141441  | 0.641771    | 3.239128067 |
| Gm14306       | chr2:176131421-176141950  | 0.641393359 | 0.015375478 |
| Slc4a11       | chr2:130509843-130523255  | 0.641306033 | 4.165163333 |
| Pla2g1b       | chr5:115916274-115924726  | 0.640283333 | 0.164357333 |
| Ctps          | chr4:120212472-120242881  | 0.6401426   | 4.168866667 |
| Hes7          | chr11:68933954-68936761   | 0.640125333 | 0           |
| Cldn19        | chr4:118928045-118935043  | 0.6399767   | 0.215683167 |
| Zfp9          | chr6:118411967-118429291  | 0.639817    | 0.684861    |
| 4930525G20Rik | chr13:67897530-67931922   | 0.638764    | 1.3942768   |
| Tro           | chrX:147079845-147091979  | 0.638364333 | 0           |
| Slc16a14      | chr1:84903279-84931658    | 0.637017667 | 0.118986333 |
| Rilp          | chr11:75323595-75326668   | 0.636473333 | 0           |
| Fam82a1       | chr17:80014239-80081492   | 0.635668333 | 0.788124    |
| Gas2l3        | chr10:88871567-88906712   | 0.635279667 | 1.755753    |
| Mlxipl        | chr5:135582760-135614252  | 0.634646667 | 3.466861667 |
| Il12rb2       | chr6:67242011-67326131    | 0.634073333 | 10.79811733 |
| Gramd2        | chr9:59555570-59564231    | 0.633953333 | 0           |
| 1110015O18Rik | chr3:4798707-4814911      | 0.633896333 | 0           |
| Kifc5b        | chr17:27054035-27069524   | 0.633838333 | 0.216765667 |
| Gm514         | chr9:65208866-65228184    | 0.63382     | 0.359773333 |
| Sel1l2        | chr2:140055593-140215446  | 0.633184333 | 0.153764667 |
| 2010010A06Rik | chr18:75448313-75456983   | 0.632218667 | 4.501946667 |
| Srcrb4d       | chr5:136436092-136450346  | 0.632166    | 0.626153833 |
| Zglp1         | chr9:20866836-20871537    | 0.632055667 | 0           |
| Nrn1l         | chr8:108417469-108418915  | 0.631886667 | 0           |
| Rd3           | chr1:193801253-193812163  | 0.630756667 | 0.043574    |
| 4930414N06Rik | chr19:45046606-45059040   | 0.630655333 | 1.61933     |
| Fgfr1         | chr8:26629243-26686186    | 0.629846667 | 4.57919     |
| 4932411L15    | chr1:12657643-12663171    | 0.629295    | 0.268825333 |
| Gm14482       | chrX:10885880-10886389    | 0.62829159  | 0.000351906 |
| 4930555I21Rik | chr4:135051901-135093718  | 0.627339667 | 0.180899    |
| Chrm4         | chr2:91762345-91769986    | 0.627332    | 0.119853    |
| Nppc          | chr1:88562867-88567148    | 0.627175333 | 2.992606667 |
| Plekha4       | chr7:52781699-52809599    | 0.6269781   | 0.654617    |
| C1qtnf9       | chr14:61386970-61399706   | 0.626283333 | 0           |
| Ugt1a7c       | chr1:89991575-90116577    | 0.626222667 | 0.930322334 |
| Rph3al        | chr11:75645659-75724528   | 0.626070333 | 7.33011     |

|               |                           |             |             |
|---------------|---------------------------|-------------|-------------|
| Gm960         | chr19:4625840-4698668     | 0.625777667 | 0.280770767 |
| Gapdhs        | chr7:31514905-31524375    | 0.624538    | 0.289130333 |
| Stac3         | chr10:126938772-126945871 | 0.624352933 | 0.383821    |
| Mmel1         | chr4:154243693-154269639  | 0.624286667 | 0           |
| 2700090O03Rik | chr8:34852583-34858242    | 0.62419     | 0           |
| Zfp811        | chr17:32933955-32946864   | 0.623809    | 0.572317733 |
| 4931428F04Rik | chr8:107804308-107813428  | 0.623746333 | 0.883434448 |
| Dnahc5        | chr15:28133520-28401800   | 0.623320433 | 2.031072    |
| Shank3        | chr15:89330287-89390691   | 0.623053333 | 0.192405    |
| Npm3          | chr19:45822223-45824053   | 0.622726333 | 1.6689      |
| Mgat5b        | chr11:116780176-116848258 | 0.622043667 | 0.801603667 |
| Ngf           | chr3:102273850-102324936  | 0.621563333 | 0.178127333 |
| Ggt7          | chr2:155316115-155340582  | 0.621518667 | 0.542415    |
| Slc10a6       | chr5:104034729-104058422  | 0.620586667 | 0.470907667 |
| Kctd4         | chr14:76354809-76365024   | 0.620562667 | 4.696693333 |
| Lrrc23        | chr6:124719880-124729736  | 0.620253333 | 12.89978867 |
| D18Ertd653e   | chr18:68092910-68415203   | 0.620128    | 0.371321    |
| Dfnb59        | chr2:76488329-76496613    | 0.61968     | 0           |
| Dnmbp         | chr19:43922456-43986882   | 0.618969    | 2.215251    |
| Scd4          | chr19:44407815-44421233   | 0.618726233 | 0.061425733 |
| Gm14306       | chr2:175295525-175306054  | 0.618563356 | 0.006750825 |
| Mmp28         | chr11:83255377-83276463   | 0.618526333 | 0.4532433   |
| Txlnb         | chr10:17516024-17565469   | 0.6180657   | 0.152073    |
| Recql4        | chr15:76533982-76540989   | 0.617694    | 0.336830867 |
| Chd5          | chr4:151712759-151764303  | 0.617552    | 0.150935667 |
| Naaa          | chr5:92686685-92707207    | 0.617335    | 1.64233     |
| Cabyr         | chr18:12899863-12913651   | 0.616494    | 0.82063     |
| Hip1          | chr5:135882387-136020992  | 0.615876167 | 0.761393333 |
| Gm19466       | chr18:53807804-53865072   | 0.615726    | 7.008686667 |
| Pid1          | chr1:84032867-84281220    | 0.615686    | 0           |
| Ankle1        | chr8:73929910-73933803    | 0.6150346   | 1.913029333 |
| Chrnd         | chr1:89087226-89096645    | 0.614363333 | 4.484593333 |
| 2310061J03Rik | chr16:55973380-55974730   | 0.614348333 | 0.631805333 |
| Kif18a        | chr2:109120894-109181903  | 0.614213    | 4.356123333 |
| Arhgef19      | chr4:140798798-140813477  | 0.614032    | 2.120369667 |
| Abi3bp        | chr16:56477958-56690248   | 0.6128446   | 1.767188    |
| Wdr63         | chr3:145703489-145771000  | 0.612468667 | 1.14729     |
| BC048609      | chr19:6080037-6080785     | 0.611952667 | 2.985743333 |
| Zfp354a       | chr11:50872758-50886301   | 0.611891333 | 1.237187667 |
| Wnt7b         | chr15:85365866-85412251   | 0.611388667 | 1.47676     |
| Gm4636        | chr7:28769489-28799134    | 0.611026333 | 0.485179667 |
| Ar            | chrX:95345088-95512486    | 0.61041     | 1.05193     |
| 4632428C04Rik | chr16:30008752-30021516   | 0.610123333 | 0.240563333 |
| 2310014L17Rik | chr7:13512764-13516421    | 0.609828067 | 9.684843333 |
| Prrt2         | chr7:134161055-134164725  | 0.609600267 | 1.691874667 |
| Mnd1          | chr3:83891855-83959708    | 0.608664667 | 2.966983333 |
| Cpne2         | chr8:97056927-97094429    | 0.608228967 | 3.143964333 |
| Fut4-ps1      | chr17:56873650-56878715   | 0.606773333 | 0           |
| Slc5a4a       | chr10:75610195-75652010   | 0.606319667 | 0.709052    |
| 9230116N13Rik | chr1:138308492-138312096  | 0.605203    | 0.503883333 |
| BC021785      | chr10:39677866-39706452   | 0.604123333 | 0.0860035   |
| Cdc42ep1      | chr15:78673076-78681332   | 0.60316     | 1.142173667 |



|               |                           |             |             |
|---------------|---------------------------|-------------|-------------|
| LOC433047     | chr16:88811684-88812465   | 0.60241     | 3.985366667 |
| C85492        | chr9:121890723-121905144  | 0.601749    | 2.159797667 |
| Adam4         | chr12:82520535-82522865   | 0.601646    | 1.602265667 |
| Gm10334       | chr6:41392212-41396096    | 0.599877333 | 0           |
| Nxn1          | chr8:74084453-74090548    | 0.5994956   | 0           |
| Epdr1         | chr13:19683576-19711699   | 0.599410767 | 3.127293333 |
| Scnn1b        | chr7:129008624-129062030  | 0.597664933 | 3.506433333 |
| Cyp7b1        | chr3:17971949-18143338    | 0.597622    | 1.9343      |
| Lilrb3        | chr7:3664106-3671984      | 0.596074    | 0.234905    |
| BC064078      | chr6:128943037-128956667  | 0.595884333 | 5.042199333 |
| Inhba         | chr13:16106307-16119044   | 0.595783333 | 0.102022    |
| Zik1          | chr7:11072572-11080730    | 0.59556     | 0.547932533 |
| Gm14440       | chr2:175100625-175112306  | 0.593788    | 0.213105467 |
| Tsen2         | chr6:115494721-115528354  | 0.593636    | 1.071910033 |
| Sgol2         | chr1:58042183-58083121    | 0.593120333 | 2.782193333 |
| Pfkfb4        | chr9:108893946-108934739  | 0.592885667 | 2.180999    |
| Klrb1b        | chr6:128763723-128776333  | 0.592236333 | 0.308604667 |
| Fcho1         | chr8:74232285-74249580    | 0.591109667 | 3.990706667 |
| Chrne         | chr11:70428384-70432696   | 0.590357067 | 3.343277    |
| Klk1          | chr7:51480806-51484987    | 0.59011     | 99.32256667 |
| Ccdc73        | chr2:104726480-104839894  | 0.589605    | 0.992304333 |
| Fam54a        | chr10:20067624-20081475   | 0.589472333 | 1.080367333 |
| Upk1b         | chr16:38773296-38800316   | 0.589425933 | 10.07       |
| Xylt2         | chr11:94525160-94538807   | 0.5892      | 3.502604333 |
| Gckr          | chr5:31599953-31629675    | 0.588831    | 0.186472    |
| Gm14288       | chr2:175100624-175112306  | 0.588611333 | 0.2118173   |
| Socs1         | chr16:10783901-10785629   | 0.588525    | 3.372033333 |
| Prok2         | chr6:99661292-99676386    | 0.58839     | 23.70025017 |
| 4933400C05Rik | chr11:103069440-103079746 | 0.587846667 | 0           |
| Baiap2l2      | chr15:79088624-79115939   | 0.586217433 | 0.292532667 |
| Psmb9         | chr17:34319043-34324275   | 0.586183333 | 2.540823333 |
| Thsd7a        | chr6:12261607-12699253    | 0.586144267 | 0.347454467 |
| Sox11         | chr12:28019132-28027583   | 0.586098667 | 2.82305     |
| Prlr          | chr15:10106992-10278935   | 0.585952333 | 2.60543     |
| Gm13139       | chr4:146506201-146554688  | 0.585670753 | 1.23377012  |
| Adam8         | chr7:147164839-147178387  | 0.585406667 | 3.840352    |
| Daam2         | chr17:49595346-49703662   | 0.585235667 | 0.152991    |
| BC033916      | chr17:34042079-34043620   | 0.5852      | 0           |
| Plin4         | chr17:56240013-56249225   | 0.584562933 | 0.314973    |
| Gm14440       | chr2:176318181-176329862  | 0.584517    | 0.2032832   |
| D330050G23Rik | chr2:116725887-116738527  | 0.584313333 | 0           |
| B430010I23Rik | chr8:42102821-42109570    | 0.583652367 | 0.80724     |
| C130079G13Rik | chr3:59729135-59741871    | 0.583629333 | 0.326039    |
| Unc5d         | chr8:29757188-30330108    | 0.583481667 | 0.67519     |
| Epdr          | chr9:21763342-21768020    | 0.583228    | 0.723813233 |
| Bdkrb1        | chr12:106842300-106843638 | 0.582645    | 0           |
| Gm20604       | chr12:103978039-103996020 | 0.581723333 | 0.480456668 |
| Fads3         | chr19:10116037-10134161   | 0.581362667 | 0.792513333 |
| Gpc3          | chrX:49625603-49967151    | 0.581094333 | 3.5238      |
| 1700110C19Rik | chr17:10517466-10522177   | 0.580261333 | 0           |
| Bmp1          | chr14:70874361-70920067   | 0.579892333 | 2.865146667 |
| Gm14440       | chr2:175788488-175800169  | 0.579668333 | 0.220846667 |

|               |                           |             |             |
|---------------|---------------------------|-------------|-------------|
| Ctrl          | chr8:108455893-108457762  | 0.57966     | 0.628803667 |
| A830082N09Rik | chr10:33707021-33714861   | 0.579451333 | 0.109478167 |
| Ceacam18      | chr7:50890108-50904664    | 0.5792      | 0           |
| Cit           | chr5:116295664-116456350  | 0.578744    | 0.699912333 |
| Nckipsd       | chr9:108710710-108720697  | 0.578213667 | 1.389888433 |
| Snx22         | chr9:65912982-65917538    | 0.578083667 | 2.7836633   |
| Aars2         | chr17:45643789-45657792   | 0.577812333 | 1.10637     |
| Olfr12        | chr1:94516457-94517578    | 0.577496    | 0           |
| Nrg3          | chr14:39182136-40286376   | 0.577328333 | 0           |
| C630043F03Rik | chr4:71862277-71864964    | 0.577204667 | 0.298839    |
| A930019D19Rik | chr2:146085021-146092896  | 0.577038    | 0           |
| A230051G13Rik | chr11:58968870-58977244   | 0.576713233 | 1.636129667 |
| Vmn1r77       | chr7:12626647-12627568    | 0.5765      | 0.118528667 |
| Tmem185b      | chr1:121422730-121425560  | 0.576482333 | 0.389868333 |
| A730037C10Rik | chr3:54943959-54976857    | 0.576031767 | 0.032690767 |
| Zc3hav1l      | chr6:38237393-38249259    | 0.5748878   | 9.945643333 |
| Esrrg         | chr1:189432884-190038763  | 0.574836367 | 6.10083     |
| Gm14288       | chr2:175788488-175800170  | 0.574633333 | 0.218968633 |
| Arhgap40      | chr2:158338531-158376364  | 0.573626667 | 1.417944333 |
| Sox8          | chr17:25702837-25707631   | 0.572916667 | 6.14603     |
| 1700055N04Rik | chr19:3958807-3970438     | 0.572646    | 0.505670333 |
| 4930426L09Rik | chr2:18919945-18921431    | 0.572496333 | 0           |
| 1700101I11Rik | chr6:129482201-129483302  | 0.571707333 | 0           |
| Npas2         | chr1:39251116-39420085    | 0.571147667 | 4.330073333 |
| Gm14288       | chr2:176318181-176329863  | 0.5711      | 0.201433167 |
| Lat2          | chr5:135076134-135090893  | 0.570906667 | 0.033731333 |
| Kif18b        | chr11:102766832-102786438 | 0.569766667 | 0.94284     |
| Smtnl2        | chr11:72203615-72225215   | 0.56972     | 0.229329533 |
| Arhgap25      | chr6:87409378-87483229    | 0.569072933 | 0.36849     |
| Espnl         | chr1:93218651-93244880    | 0.568886    | 0.095370333 |
| Ppara         | chr15:85565993-85637281   | 0.568681333 | 0.4591814   |
| Zfp947        | chr17:22281325-22302944   | 0.568027    | 0.384095    |
| Zfp78         | chr7:6316014-6335315      | 0.567573    | 0.409696967 |
| Aadacl2       | chr3:59810664-59829342    | 0.566964333 | 1.80638     |
| Mospd4        | chr18:46624587-46625470   | 0.566879333 | 0           |
| Gm13375       | chr2:20890500-20891975    | 0.56682     | 5.256286667 |
| Klhl32        | chr4:24544419-24778233    | 0.566777    | 0.216276667 |
| Ctsk          | chr3:95303207-95313284    | 0.565677333 | 2.817463    |
| 5430435G22Rik | chr1:133585271-133610041  | 0.565324267 | 1.057530333 |
| F5            | chr1:166081989-166150405  | 0.564459767 | 3.908825333 |
| 4921511C10Rik | chr3:79016840-79057835    | 0.563791333 | 0.098528333 |
| Dnahc6        | chr6:72967600-73171625    | 0.563306333 | 1.386546667 |
| Itga10        | chr3:96449506-96468442    | 0.563150667 | 1.989873667 |
| Dnahc7a       | chr1:53453845-53763628    | 0.563091333 | 0.847019333 |
| H2-Q8         | chr17:35531043-35532577   | 0.562499    | 2.497456333 |
| Ppp1r3g       | chr13:36059774-36062257   | 0.561796667 | 0           |
| Dcc           | chr18:71413285-72510723   | 0.561311667 | 0.006650433 |
| Rnf144a       | chr12:26991662-27100121   | 0.560741667 | 0.006894933 |
| Pxt1          | chr17:29070930-29079207   | 0.558483667 | 0.041797667 |
| Calcr1        | chr2:84170782-84265423    | 0.558367    | 0.579330333 |
| Gm7550        | chr12:55488719-55492305   | 0.557705    | 0           |
| Dnaic1        | chr4:41516826-41585191    | 0.557196233 | 0.667253833 |

|               |                           |             |             |
|---------------|---------------------------|-------------|-------------|
| Col7a1        | chr9:108855789-108886920  | 0.556595333 | 1.185069667 |
| Klhl30        | chr1:93247649-93258981    | 0.556163333 | 0           |
| Pcx           | chr19:4510471-4621752     | 0.555985333 | 2.091012667 |
| Nppa          | chr4:147374854-147376176  | 0.55567     | 0           |
| Tram2         | chr1:20991458-21069306    | 0.555473333 | 5.744696667 |
| Celsr3        | chr9:108728650-108755300  | 0.555360667 | 0.683214033 |
| Fam149a       | chr8:46422068-46467645    | 0.55531     | 1.515408    |
| Zcwpw1        | chr5:138229029-138263849  | 0.555022333 | 1.00892     |
| Gm9926        | chr18:66663831-66671391   | 0.55407     | 0           |
| Limch1        | chr5:67137078-67448398    | 0.553743567 | 0.924605667 |
| Dpp4          | chr2:62168129-62250288    | 0.553252333 | 1.066661    |
| Ltk           | chr2:119577061-119586167  | 0.553027333 | 1.179137    |
| Gm17365       | chr9:35452697-35455787    | 0.552966667 | 0           |
| Scin          | chr12:40786357-40860815   | 0.552729    | 1.29859     |
| Hectd2        | chr19:36629128-36695625   | 0.552228333 | 0.690538967 |
| Slc25a2       | chr18:37797031-37798377   | 0.55213     | 1.463608733 |
| Gm19897       | chr7:29559917-29566533    | 0.551897333 | 0.937010333 |
| Gm3985        | chr8:33998976-34060498    | 0.551779667 | 0           |
| Gm14207       | chr2:119146934-119151933  | 0.551694667 | 4.012287108 |
| Rimbp2        | chr5:129266275-129459237  | 0.551254667 | 0.77581     |
| Serpina3n     | chr12:105644917-105652539 | 0.550143333 | 0.143527667 |
| Rasgrp4       | chr7:29919951-29938974    | 0.550080333 | 0.596030667 |
| Cryba1        | chr11:77532233-77538795   | 0.549089667 | 1.721406667 |
| Plcd3         | chr11:102931609-102962972 | 0.548012667 | 0.694370667 |
| 2700099C18Rik | chr17:95149439-95174469   | 0.547791333 | 0.410805667 |
| Pipox         | chr11:77694116-77707374   | 0.547573333 | 0           |
| Tsnaxip1      | chr8:108351643-108368576  | 0.547013333 | 2.336449    |
| AI607873      | chr1:175653558-175671940  | 0.546806667 | 0           |
| Rasa4         | chr5:136559785-136587730  | 0.546016667 | 0.010943667 |
| Frem1         | chr4:82543823-82698071    | 0.545748333 | 0.542766    |
| Tecta         | chr9:42137704-42208012    | 0.545520433 | 0.686172333 |
| Dleu7         | chr14:62895065-62911816   | 0.545411    | 0.170005333 |
| 4931403E22Rik | chr19:26843290-26898397   | 0.545317    | 0.588642    |
| Fam171a2      | chr11:102298295-102308977 | 0.545246    | 3.471583333 |
| Adamts1       | chr16:85794072-85803360   | 0.545033    | 2.169081333 |
| Cdk5r1        | chr11:80290547-80294681   | 0.544936    | 0.855452667 |
| 5730559C18Rik | chr1:138110098-138130857  | 0.544098    | 7.418273333 |
| Cel           | chr2:28411339-28418882    | 0.543655667 | 0           |
| Myo7a         | chr7:105199563-105268003  | 0.543595333 | 1.373371667 |
| Nr1h3         | chr2:91024217-91035273    | 0.5432564   | 0.038771333 |
| Fam24a        | chr7:138478135-138480230  | 0.542093333 | 0           |
| Rai2          | chrX:158154967-158217426  | 0.541892    | 0.763820667 |
| Xylt1         | chr7:124524492-124811144  | 0.5404169   | 0.446899    |
| Cyp2a4        | chr7:27092210-27100107    | 0.54024     | 1.929495333 |
| Olfm1         | chr2:28048612-28086256    | 0.540189767 | 0.563908    |
| C030030A07Rik | chr6:136778451-136783971  | 0.5395464   | 0.015246167 |
| Gm19710       | chr3:89802681-89805247    | 0.539083    | 1.09685     |
| Sall2         | chr14:52930851-52948345   | 0.538976    | 0.505097    |
| Arsj          | chr3:126066769-126143292  | 0.53889     | 0.621595333 |
| Arhgap6       | chrX:165233030-165742367  | 0.538733333 | 0.136863    |
| Gm10436       | chr12:89414032-89420338   | 0.538228    | 1.913197667 |
| Plcb1         | chr2:134611899-135300994  | 0.538210667 | 0.0475152   |

|               |                           |             |             |
|---------------|---------------------------|-------------|-------------|
| Gm600         | chr14:66224103-66267280   | 0.537323333 | 0           |
| Cpxm1         | chr2:130216510-130223365  | 0.536734333 | 0.6654949   |
| Abcg4         | chr9:44081272-44096327    | 0.5364783   | 3.06023     |
| Nmral1        | chr16:4711317-4719059     | 0.535821667 | 7.047921    |
| Amotl2        | chr9:102620133-102635747  | 0.535373767 | 1.58378     |
| Olf995        | chr2:85278365-85279313    | 0.535003333 | 0           |
| Catsperg1     | chr7:29966550-29999052    | 0.534616667 | 0           |
| Ank1          | chr8:24085353-24260968    | 0.534088    | 0.052589833 |
| Gm10536       | chr18:57095913-57100172   | 0.533746667 | 0           |
| Csf1r         | chr18:61265225-61290793   | 0.533354833 | 0.429066667 |
| Prex2         | chr1:10983545-11293763    | 0.533278433 | 0.6313541   |
| Gm13285       | chr4:88443300-88443849    | 0.533166667 | 6.37E-08    |
| Npm2          | chr14:71047108-71052891   | 0.532212667 | 0.34203     |
| Ybey          | chr10:75922311-75931859   | 0.531937633 | 1.18861     |
| Cux2          | chr5:122310224-122497834  | 0.531919333 | 1.079172    |
| Hist1h1a      | chr13:23855536-23856283   | 0.53181     | 0.943907667 |
| Mzf1          | chr7:13627651-13640113    | 0.530432    | 0.112566    |
| Rhbdl3        | chr11:80114413-80169488   | 0.530259333 | 0.444708667 |
| LOC626904     | chr6:25881425-25927227    | 0.530220667 | 0           |
| Zfp940        | chr7:30628954-30638667    | 0.528719667 | 2.551985667 |
| Capn12        | chr7:29666674-29678604    | 0.528425333 | 0.536235667 |
| Gbp5          | chr3:142159897-142185308  | 0.527600333 | 0           |
| Cyp2d22       | chr15:82200956-82210690   | 0.526983333 | 0.133241667 |
| Eda2r         | chrX:94529179-94572548    | 0.526202333 | 1.244826667 |
| Sphk1         | chr11:116393224-116397989 | 0.525491    | 0.101406667 |
| Ksr1          | chr11:78828302-78959856   | 0.525246667 | 0           |
| Mybl2         | chr2:162880370-162910423  | 0.525013333 | 0.414167967 |
| Fam69a        | chr5:108337060-108416096  | 0.525009433 | 0.287538333 |
| Fbp1          | chr13:62966112-62989596   | 0.523716    | 1.468624767 |
| Rnf207        | chr4:151681131-151692734  | 0.5236471   | 1.045632633 |
| Cdh3          | chr8:109034790-109080808  | 0.523208    | 3.516082    |
| Serp1b13      | chr1:108877560-108897772  | 0.522386533 | 0.048162333 |
| Nhlrc1        | chr13:47107925-47110219   | 0.5219487   | 0.625202833 |
| Htra4         | chr8:26135399-26149434    | 0.521621333 | 0           |
| Gpr124        | chr8:28196312-28233908    | 0.520361233 | 0.259223333 |
| Stc1          | chr14:69647345-69659458   | 0.520188533 | 0.880812667 |
| Dhfr          | chr13:93124737-93159008   | 0.518819133 | 0.040895167 |
| Mc1r          | chr8:125930981-125934647  | 0.518469667 | 1.466440633 |
| Zfp300        | chrX:20656275-20666355    | 0.517724    | 0.483473    |
| Sox2ot        | chr3:34459302-34576915    | 0.517628333 | 0.2708053   |
| Fat3          | chr9:15714636-16182675    | 0.517418033 | 5.277386667 |
| Ckap2         | chr8:23278623-23296291    | 0.517279667 | 2.301109    |
| Nlrp4f        | chr13:65278418-65307024   | 0.517125333 | 0.0169317   |
| Tal2          | chr4:53792576-53799757    | 0.515367333 | 0           |
| 1110017F19Rik | chr11:115773330-115775231 | 0.515347667 | 14.56655333 |
| Nhedc2        | chr3:134970663-135005731  | 0.515343333 | 0           |
| Tmeff2        | chr1:50984366-51244114    | 0.515194933 | 0.032250233 |
| Tnfrsf13c     | chr15:82052173-82054766   | 0.514803333 | 1.265746    |
| Plk5          | chr10:79819203-79828234   | 0.51457     | 0           |
| Wdr93         | chr7:86888048-86930836    | 0.514001167 | 0.676696667 |
| Tmc7          | chr7:125679357-125728200  | 0.513932333 | 1.880026667 |
| Ccdc78        | chr17:25923524-25927458   | 0.513908    | 1.024126667 |

|               |                           |             |             |
|---------------|---------------------------|-------------|-------------|
| 4930422G04Rik | chr3:127256406-127320941  | 0.512447667 | 1.49876     |
| Fbxw10        | chr11:62660624-62690964   | 0.512165333 | 0           |
| Gpr157        | chr4:149461611-149480036  | 0.511974733 | 0.987510667 |
| Caskin1       | chr17:24625727-24645852   | 0.511569    | 0.541144    |
| Atg9b         | chr5:23889998-23897961    | 0.511303067 | 0.838433333 |
| Shh           | chr5:28783379-28793641    | 0.511282333 | 2.875872667 |
| Tekt3         | chr11:62875160-62908462   | 0.511106667 | 0           |
| Col20a1       | chr2:180721239-180752245  | 0.510991333 | 0.762944333 |
| Neurl1b       | chr17:26551909-26583287   | 0.510030333 | 1.516430333 |
| Lrrc50        | chr8:122099134-122122354  | 0.509916667 | 1.62673     |
| 4930417G10Rik | chr12:4720610-4745189     | 0.509339333 | 0.077008    |
| Higd1b        | chr11:102697609-102699353 | 0.508652333 | 0.117843667 |
| 1190005I06Rik | chr8:123132501-123158282  | 0.508652333 | 0           |
| Nptx1         | chr11:119400032-119409134 | 0.5086453   | 0.754176667 |
| Tmem211       | chr5:113655928-113668283  | 0.508514    | 1.651333333 |
| Gm4566        | chr17:71682540-71691144   | 0.507006667 | 0.453710333 |
| Zdhhc14       | chr17:5492599-5753891     | 0.506194967 | 5.67775     |
| Slc2a9        | chr5:38740511-38893391    | 0.505753333 | 1.305655    |
| Mfsd3         | chr15:76531971-76534669   | 0.5055168   | 8.576083333 |
| 1700025M24Rik | chr5:73659818-73675423    | 0.505336333 | 0           |
| Htr5b         | chr1:123406349-123425042  | 0.505293333 | 0.093755667 |
| Rnf180        | chr13:105937573-106083094 | 0.505276767 | 0.684413667 |
| Kctd21        | chr7:104480832-104498726  | 0.505036    | 0.434877333 |
| Sct           | chr7:148464236-148465030  | 0.504926    | 0.340103333 |
| Tmem108       | chr9:103385265-103664167  | 0.504636    | 0.0161293   |
| Clca1         | chr3:144393279-144423703  | 0.504600133 | 2.3149417   |
| Slc22a13b     | chr9:119129608-119140810  | 0.504388333 | 1.599398567 |
| Ccne2         | chr4:11118500-11131926    | 0.504346467 | 0.288649333 |
| 1700123M08Rik | chr4:11893720-11921442    | 0.503780667 | 0.393063333 |
| Neto2         | chr8:88160486-88214908    | 0.503455    | 6.56647     |
| Qrich2        | chr11:116302638-116315661 | 0.503409667 | 0.204262133 |
| Egf           | chr3:129380492-129458240  | 0.5021872   | 1.056946667 |
| Ssxb5         | chrX:8380816-8386512      | 0.502156333 | 0.065196    |
| Tigd3         | chr19:5891137-5894107     | 0.501872667 | 0.2093027   |
| D3Bwg0562e    | chr3:117022062-117063794  | 0.501641333 | 2.250593    |
| 4833412C05Rik | chr7:74929423-74948382    | 0.501376667 | 0           |
| Hunk          | chr16:90386641-90499798   | 0.501374667 | 0.674115333 |
| Plaur         | chr7:25247518-25260892    | 0.501119667 | 2.581019333 |
| Cfb           | chr17:34993318-34999459   | 0.500460433 | 2.368996667 |
| 6530418L21Rik | chr3:105507516-105523760  | 0.500214533 | 0.717164333 |
| Gm5797        | chr14:8156501-8164909     | 0.499343333 | 0           |
| AW046200      | chr8:60130549-60142227    | 0.499228667 | 0.371506867 |
| Sall4         | chr2:168573831-168592701  | 0.498432333 | 0.605719    |
| Klf8          | chrX:149672587-149830677  | 0.497645833 | 0.087119667 |
| Pltp          | chr2:164665017-164683208  | 0.49735     | 1.9027214   |
| Nell1         | chr7:57230719-58118659    | 0.497072333 | 0.586480667 |
| Gm14873       | chr17:47836917-47838945   | 0.496760042 | 1.161806667 |
| Derl3         | chr10:75356142-75358686   | 0.496241667 | 0.826727333 |
| Cdyl2         | chr8:119092623-119256891  | 0.495453    | 1.898397333 |
| Itga4         | chr2:79095582-79173271    | 0.495229333 | 0.024851067 |
| Zfp72         | chr13:74508873-74514014   | 0.493009333 | 2.792288333 |
| Disc1         | chr8:127578094-127785051  | 0.492973    | 0.1338113   |

|               |                           |             |             |
|---------------|---------------------------|-------------|-------------|
| Cenpt         | chr8:108368577-108375908  | 0.492807667 | 4.440776667 |
| Nr1i2         | chr16:38248434-38294910   | 0.492486667 | 1.598214333 |
| 5730577I03Rik | chr9:20411918-20421715    | 0.492362333 | 0.537973367 |
| Gpr182        | chr10:127186657-127188854 | 0.492114067 | 0.045338    |
| Sync          | chr4:128964864-128985803  | 0.491918    | 3.34E-11    |
| Etv2          | chr7:31418634-31420871    | 0.491457667 | 0           |
| Igdcc4        | chr9:64949301-64985750    | 0.491368    | 0.933037667 |
| Tmem198b      | chr10:128237091-128241426 | 0.491301333 | 8.916477667 |
| Cp            | chr3:19857053-19907609    | 0.49124     | 3.180333333 |
| 4933406J10Rik | chr7:89891855-89904154    | 0.491079667 | 3.393665333 |
| 3110021N24Rik | chr4:108392253-108454509  | 0.490735    | 2.055116333 |
| Gsdmd         | chr15:75692768-75697834   | 0.4905486   | 3.957172333 |
| Nkain1        | chr4:130125704-130169623  | 0.489985    | 0.215833667 |
| Zc3h12d       | chr10:7552267-7590195     | 0.488655233 | 0.245879    |
| Gm5124        | chrX:20937990-20941750    | 0.486947333 | 6.25069     |
| Atp13a5       | chr16:29231999-29378818   | 0.486384633 | 0.811576667 |
| Paqr7         | chr4:134052892-134064725  | 0.486024333 | 1.977466667 |
| Gm14685       | chrX:70382570-70388763    | 0.48556     | 1.788116893 |
| Fbxo5         | chr10:4541075-4547383     | 0.485185    | 6.451489667 |
| Ager          | chr17:34734806-34737877   | 0.485093333 | 0.913774    |
| Apom          | chr17:35265941-35268697   | 0.48474     | 0.133287333 |
| Traf3ip3      | chr1:195001697-195027740  | 0.484334333 | 0.218424667 |
| Crispld1      | chr1:17717497-17756288    | 0.4840928   | 0           |
| Tgtp2         | chr11:48798830-48805756   | 0.48374815  | 0           |
| Gm11938       | chr11:99463959-99464622   | 0.4821      | 0.139562333 |
| Piwil2        | chr14:70772286-70828901   | 0.4820168   | 0.225741667 |
| Eltd1         | chr3:151100845-151208045  | 0.481503333 | 0           |
| H2-Q9         | chr17:35576111-35580715   | 0.480502602 | 1.01E-05    |
| Hspb9         | chr11:100575163-100575889 | 0.479973667 | 0           |
| Tbx6          | chr7:133924996-133929062  | 0.479039433 | 0.505679133 |
| Pbk           | chr14:66424747-66436659   | 0.47891     | 0.559224    |
| B3galt4       | chr17:34086856-34088433   | 0.478517333 | 0.385848    |
| Gm5887        | chr6:147023583-147035554  | 0.47823     | 0           |
| Phf11         | chr14:59895749-59916359   | 0.477760667 | 0.3971      |
| Ccdc113       | chr8:98057999-98082788    | 0.477543333 | 1.059723    |
| Pcdh18        | chr3:49547217-49561238    | 0.477003333 | 0.022654567 |
| Akap5         | chr12:77425877-77435138   | 0.476927667 | 1.47154     |
| Ptch2         | chr4:116768960-116787436  | 0.476761667 | 1.798732333 |
| 1700094J05Rik | chr10:75851759-75864252   | 0.476615017 | 0.124986724 |
| Arhgef40      | chr14:52604507-52625922   | 0.476307333 | 3.676593333 |
| Lce1c         | chr3:92483168-92484840    | 0.476246667 | 0           |
| Bhlha15       | chr5:144951154-144955310  | 0.475833833 | 3.12895     |
| 4921515J06Rik | chr3:108743001-108763694  | 0.475706333 | 1.570793333 |
| Gm6583        | chr5:112782820-112785053  | 0.474733333 | 0.332564333 |
| Inha          | chr1:75503651-75506929    | 0.474035333 | 3.270430667 |
| Dlg4          | chr11:69832106-69859033   | 0.473532333 | 5.4025      |
| Irg1          | chr14:103446228-103455790 | 0.473193333 | 0.200756667 |
| Gprin1        | chr13:54838033-54851030   | 0.472995533 | 0.1412236   |
| Thsd1         | chr8:23337774-23371804    | 0.472883333 | 1.029286667 |
| Gm6194        | chr3:8461386-8463098      | 0.472569333 | 0.128852    |
| Adap2         | chr11:79967663-79992329   | 0.47214     | 0           |
| Gm6277        | chr18:11979596-11997886   | 0.472130667 | 0.046911667 |

|               |                           |             |             |
|---------------|---------------------------|-------------|-------------|
| Gm16982       | chr7:148795964-148799646  | 0.472056333 | 0.157490567 |
| Stk10         | chr11:32433265-32524595   | 0.471582    | 0.58987     |
| B230319C09Rik | chr6:83391748-83398316    | 0.471420567 | 1.365629667 |
| Gm13285       | chr4:88425753-88426302    | 0.471347967 | 0.030359033 |
| Tgm2          | chr2:157942140-157972128  | 0.470892267 | 4.038507233 |
| H1fx          | chr6:87930414-87931476    | 0.47072     | 2.134674    |
| Nfatc4        | chr14:56443631-56452780   | 0.470422    | 1.020306667 |
| Olf988        | chr2:85193151-85194081    | 0.470256    | 0           |
| Itpk1         | chr12:103806792-103943079 | 0.469529933 | 1.618381667 |
| Ska1          | chr18:74354952-74367472   | 0.469510433 | 0.24685     |
| Pycr1         | chr11:120497025-120504984 | 0.469420333 | 0.354295    |
| Hspa12b       | chr2:130953147-130971719  | 0.4691078   | 0.175576933 |
| Dram1         | chr10:87785548-87819820   | 0.468913667 | 0.906686467 |
| Drd3          | chr16:43762354-43822952   | 0.468786667 | 0           |
| Grin2c        | chr11:115110482-115128557 | 0.4670272   | 1.920430667 |
| Syt3          | chr7:51639495-51655400    | 0.466802067 | 0.741177    |
| Nfkbid        | chr7:31208322-31213765    | 0.466287333 | 0.274156267 |
| Thbd          | chr2:148230206-148233924  | 0.466132133 | 25.1905     |
| Flrt1         | chr19:7166501-7180219     | 0.466052667 | 0.3417538   |
| Panx2         | chr15:88890155-88901337   | 0.465859    | 1.626291667 |
| Nipal4        | chr11:45961656-45979861   | 0.465825667 | 3.411796667 |
| Tgfb1i1       | chr7:135390384-135397226  | 0.464969667 | 2.791431    |
| 4933436C20Rik | chr8:94849931-94880019    | 0.464923333 | 0           |
| Fhl1          | chrX:53984963-54046523    | 0.4647551   | 1.870397333 |
| 1700100L14Rik | chr13:70712118-70714982   | 0.463813333 | 0           |
| Gm4710        | chr17:76260362-76288379   | 0.463483333 | 0           |
| Skap1         | chr11:96325904-96620936   | 0.463363333 | 0           |
| Rlbp1         | chr7:86519755-86531913    | 0.462871333 | 1.138894033 |
| Rrm2          | chr12:25393118-25399011   | 0.462609333 | 1.599115333 |
| Tmem63c       | chr12:88367513-88430989   | 0.462405333 | 1.853393333 |
| Cenph         | chr13:101529640-101545854 | 0.462360333 | 11.84633333 |
| Lrp1          | chr10:126975213-127058204 | 0.462267    | 2.74057     |
| Cd96          | chr16:46035769-46120361   | 0.462011567 | 0           |
| Chrm3         | chr13:9875858-10360049    | 0.461775933 | 0.037973667 |
| 4930483O08Rik | chr7:140319933-140334140  | 0.461709333 | 0.239789    |
| Fam176b       | chr4:125825246-125827118  | 0.460923333 | 0.145893    |
| Clspn         | chr4:126234223-126271147  | 0.460628153 | 0.7789258   |
| Mettl7a3      | chr15:100165359-100170600 | 0.4604919   | 0.022723167 |
| Gpr75         | chr11:30785357-30793725   | 0.459957833 | 2.522251667 |
| Gm10865       | chr15:78825384-78841471   | 0.459794333 | 0.283845667 |
| Psemb11       | chr14:55244146-55248393   | 0.458482333 | 0.314314    |
| Cpsf4l        | chr11:113559484-113571331 | 0.458316333 | 0.149897    |
| Zfp951        | chr5:105242186-105289087  | 0.4581958   | 0.372884333 |
| Nudt10        | chrX:5745814-5750109      | 0.456187667 | 0.041032333 |
| Isl1          | chr13:117088477-117099896 | 0.456077    | 1.45413     |
| St8sia6       | chr2:13576564-13715147    | 0.456063333 | 3.716266667 |
| Gm15941       | chr15:37350887-37362419   | 0.456024667 | 0.208169667 |
| Fhl5          | chr4:25127055-25170023    | 0.455726667 | 0           |
| Cdk1          | chr10:68799382-68815660   | 0.455123667 | 1.135512333 |
| Havcr2        | chr11:46268432-46294756   | 0.454953167 | 0.364615667 |
| Slc10a5       | chr3:10331733-10335656    | 0.454563333 | 0.703103    |
| 1810013A23Rik | chr17:28408652-28410108   | 0.453603333 | 9.20014     |

|               |                           |             |             |
|---------------|---------------------------|-------------|-------------|
| Igfbp1        | chr11:7097789-7102549     | 0.453396667 | 0           |
| 1810062O18Rik | chr14:21365514-21389902   | 0.452765333 | 3.825966667 |
| Olf1371       | chr11:52026553-52027489   | 0.451515167 | 0.2684079   |
| 1700001K23Rik | chr19:53323225-53329695   | 0.450203333 | 0.24225     |
| Cd34          | chr1:196765014-196787486  | 0.450185667 | 1.235849667 |
| Mst1r         | chr9:107809219-107822714  | 0.450109    | 0.980108667 |
| 9330159M07Rik | chr9:88736635-88753708    | 0.4499104   | 1.358215    |
| Gm16523       | chr2:39013005-39017755    | 0.449388667 | 3.263730333 |
| Cdh12         | chr15:21041206-21519288   | 0.448486967 | 1.582115333 |
| Src           | chr2:157250028-157297574  | 0.448002    | 2.673116667 |
| Tmprss6       | chr15:78270096-78299064   | 0.447885267 | 2.7922      |
| Spag16        | chr1:69873561-70771706    | 0.447143667 | 0.055393333 |
| Nek10         | chr14:15653328-15839207   | 0.447138667 | 1.141616667 |
| Dusp5         | chr19:53603807-53615812   | 0.446626333 | 0.778676667 |
| Gen1          | chr12:11247731-11272593   | 0.446248833 | 2.504031467 |
| Grk4          | chr5:35003027-35097952    | 0.446155333 | 2.427200667 |
| C230079O03    | chr7:143523898-143541098  | 0.445415667 | 1.76403     |
| Kif7          | chr7:86842983-86859072    | 0.4450263   | 0.645315    |
| 5830473C10Rik | chr5:90990234-91026932    | 0.444909333 | 0.7773217   |
| Dbc1          | chr4:68422405-68615431    | 0.444460333 | 0           |
| Gm14405       | chr2:175594788-176850107  | 0.444229333 | 0.591107    |
| Adamts6       | chr13:105077952-105284843 | 0.443582433 | 0.145862333 |
| Fads2         | chr19:10138653-10175993   | 0.443058    | 14.09145    |
| Tiam2         | chr17:3326572-3519397     | 0.442831667 | 5.25597     |
| Spata21       | chr4:140644259-140668674  | 0.442666667 | 0.012193833 |
| AI464131      | chr4:41442633-41450108    | 0.440808733 | 0.338519667 |
| 4732471J01Rik | chr7:26180432-26351436    | 0.440389667 | 0.077406167 |
| Gm9766        | chr10:52997886-53099657   | 0.43987     | 0.540420867 |
| Madcam1       | chr10:79127318-79131281   | 0.439206667 | 0           |
| Hcls1         | chr16:36935068-36963300   | 0.439078667 | 0           |
| P4ha2         | chr11:53914425-53945169   | 0.438896333 | 1.229307667 |
| Otop3         | chr11:115196047-115208240 | 0.438871333 | 4.143472333 |
| Tnfsf9        | chr17:57244807-57247180   | 0.438788    | 0.027536667 |
| Antxr2        | chr5:98313706-98459981    | 0.43759     | 1.228076667 |
| Preli2        | chr18:42035349-42110848   | 0.437433333 | 0           |
| Ddx31         | chr2:28695925-28761095    | 0.437158667 | 2.406951333 |
| H2-M3         | chr17:37407178-37411430   | 0.43637     | 3.839492    |
| Padi3         | chr4:140341283-140366563  | 0.436331667 | 0           |
| Prdm6         | chr18:53624199-53735511   | 0.435691    | 0           |
| Gcnt7         | chr2:172275812-172284096  | 0.435433333 | 0.513279967 |
| Tbc1d10c      | chr19:4184356-4191047     | 0.435274    | 0.0398482   |
| 4930572O13Rik | chr14:25959280-25962727   | 0.434003333 | 0           |
| Gpr22         | chr12:32391731-32398791   | 0.433950333 | 1.008340667 |
| 2410004A20Rik | chr9:72950204-72952250    | 0.433679267 | 0.0798746   |
| Gm17727       | chr9:35584108-35585694    | 0.433386667 | 1.377086667 |
| Apcdd1        | chr18:63081980-63112849   | 0.433100467 | 7.470399    |
| S100a4        | chr3:90407691-90409967    | 0.43305     | 31.6741     |
| Tssk1         | chr16:17894295-17895746   | 0.4329791   | 0.068607    |
| Mob3b         | chr4:34896322-35104733    | 0.432894    | 1.428497333 |
| Coch          | chr12:52694327-52706760   | 0.431821033 | 0.963013333 |
| 4933431G14Rik | chr6:72070206-72073191    | 0.431424333 | 0.023041767 |
| Piwil1        | chr5:129242120-129261349  | 0.430267067 | 0.525854333 |



|               |                               |             |             |
|---------------|-------------------------------|-------------|-------------|
| Amac1         | chr11:69573386-69575346       | 0.430265    | 0.130496333 |
| Magel2        | chr7:69521864-69526526        | 0.430030433 | 0.132319    |
| Gm1976        | chr17:95159281-95234139       | 0.4293535   | 3.133286467 |
| 4921510H08Rik | chr10:97155692-97157560       | 0.429082667 | 0           |
| Papln         | chr12:85104583-85133334       | 0.428894    | 0.210830433 |
|               | 3-Sep chr11:87394632-87404041 | 0.427972333 | 0.303215667 |
| Lmod2         | chr6:24547770-24555414        | 0.42698     | 7.572385    |
| Sertad4       | chr1:194670681-194681946      | 0.426431333 | 6.717605    |
| Atp8b4        | chr2:126146708-126317289      | 0.426218667 | 0.396357    |
| Raet1e        | chr10:21893326-21903720       | 0.425834    | 0           |
| AI506816      | chr5:23198078-23218485        | 0.425581    | 0.931056667 |
| Olfr994       | chr2:85270039-85270984        | 0.425396667 | 0           |
| 4732456N10Rik | chr15:101382786-101393381     | 0.425133333 | 0.072502    |
| Iqub          | chr6:24394864-24465067        | 0.424623333 | 1.040622833 |
| Prkcdbp       | chr7:112629129-112630711      | 0.424556667 | 1.939311333 |
| Gm15612       | chr6:88792847-88797268        | 0.424477    | 1.272307667 |
| Spry4         | chr18:38745918-38760922       | 0.424346    | 1.784545    |
| E130306D19Rik | chr4:43509015-43512532        | 0.424078767 | 2.68719     |
| Acsbg1        | chr9:54452803-54509692        | 0.423917667 | 5.02967     |
| 9030612E09Rik | chr10:42894509-42896368       | 0.423907333 | 0.34062     |
| Ppifos        | chr14:26515841-26520768       | 0.423391267 | 9.256098    |
| 9530051G07Rik | chrX:149472171-149507458      | 0.422970667 | 0           |
| Lox13         | chr6:82984217-83002558        | 0.422949333 | 0.039535667 |
| Klh13         | chrX:22796396-22942179        | 0.422786667 | 2.686738167 |
| A230073K19Rik | chr7:66537248-66544536        | 0.422621333 | 1.159807667 |
| Slc39a2       | chr14:52513284-52516420       | 0.422383333 | 0.499597667 |
| 4930529C04Rik | chr3:90875583-90879114        | 0.421782    | 0.791972333 |
| Pdk4          | chr6:5433350-5446278          | 0.421190667 | 0.717924    |
| Prkcq         | chr2:11094008-11222853        | 0.420516667 | 0.249323667 |
| Kif12         | chr4:62826670-62833165        | 0.419786667 | 0           |
| Prss41        | chr17:23973751-23981123       | 0.418726333 | 2.969643333 |
| Hmgcl1        | chr9:75862783-75984157        | 0.418452333 | 0.338672967 |
| Thpo          | chr16:20724526-20734584       | 0.418376667 | 0           |
| Nrp           | chr12:88783797-88784967       | 0.418191    | 0.301056667 |
| Riid1         | chr3:94268906-94277513        | 0.417996667 | 5.109133333 |
| Camkk2        | chr5:123181179-123229419      | 0.417762733 | 1.095162    |
| Rab42-ps      | chr4:131858108-131859271      | 0.41696     | 5.134512667 |
| Plscr4        | chr9:92352215-92387354        | 0.416947333 | 0.272558167 |
| Comp          | chr8:72897446-72905965        | 0.416599333 | 1.490263333 |
| Wdr76         | chr2:121332458-121370595      | 0.415857933 | 0.709044333 |
| D830030K20Rik | chr14:3224445-3234357         | 0.415779    | 0.16275     |
| 4933433G15Rik | chr9:75257990-75263344        | 0.415180667 | 0.356786667 |
| 1700013F07Rik | chr3:108340501-108347615      | 0.414533333 | 0           |
| Rps6ka6       | chrX:108501800-108651554      | 0.414316833 | 3.158280333 |
| Tbc1d2        | chr4:46617261-46663071        | 0.4141346   | 0.6763182   |
| Gimap9        | chr6:48626133-48628703        | 0.413702667 | 0           |
| Arhgap11a     | chr2:113671649-113688818      | 0.413563    | 3.79488     |
| Rnf183        | chr4:62088575-62095760        | 0.413497    | 0           |
| Zfp820        | chr17:21953842-21982726       | 0.413026    | 0.149734    |
| Napsa         | chr7:51827814-51842216        | 0.412413667 | 0           |
| Gm16617       | chr14:52606063-52608504       | 0.41201     | 4.962245667 |
|               | 2-Sep chr15:82105364-82124872 | 0.411785833 | 6.32143     |

|               |                           |             |             |
|---------------|---------------------------|-------------|-------------|
| Lhx6          | chr2:35937472-35960928    | 0.41099     | 4.531225333 |
| Cd276         | chr9:58372106-58388747    | 0.41084     | 2.18817     |
| Spc25         | chr2:69031951-69044247    | 0.410318933 | 1.67372     |
| Pdia2         | chr17:26332943-26336032   | 0.410193667 | 1.314520033 |
| C330027C09Rik | chr16:48994300-49019818   | 0.410184333 | 1.2739999   |
| 1700022I11Rik | chr4:42982817-42987197    | 0.410095    | 0.97136     |
| Olf126        | chr17:37987538-37988498   | 0.409973333 | 0           |
| 1700011H14Rik | chr14:49846033-49865103   | 0.409104667 | 0.562506667 |
| Gm10538       | chr1:134625929-134629403  | 0.408383333 | 4.693157667 |
| Cox8b         | chr7:148084840-148086345  | 0.408066667 | 0.277849667 |
| Hbb-b2        | chr7:110961037-110962417  | 0.40788     | 0           |
| Ppp1r14c      | chr10:6881565-6980391     | 0.407661333 | 3.25632     |
| Taf6l         | chr19:8848843-8860907     | 0.4068932   | 0.436864333 |
| 2310043J07Rik | chr5:136533136-136540194  | 0.406395    | 13.74744    |
| Chst7         | chrX:19636695-19674646    | 0.406080367 | 0           |
| Tlr6          | chr5:65344333-65351273    | 0.404978    | 0.458119    |
| Ddx11         | chr17:66472859-66501508   | 0.404717833 | 1.501918667 |
| Stfa3         | chr16:36450622-36455478   | 0.404276667 | 0.556813333 |
| Trpm3         | chr19:22213606-23064374   | 0.404201    | 0.057797333 |
| Hhip          | chr8:82489749-82581907    | 0.404126933 | 0.014398167 |
| Usp50         | chr2:126586785-126609196  | 0.402991333 | 0.043746    |
| A330041J22Rik | chr9:86589474-86595286    | 0.402576667 | 0.206821667 |
| Cabp4         | chr19:4135422-4139609     | 0.402506333 | 0.484274    |
| C4bp-ps1      | chr1:132566778-132578148  | 0.40239     | 1.383655667 |
| A330049M08Rik | chr4:134925491-134954142  | 0.402356667 | 0.787573667 |
| Gm5475        | chr15:100253623-100258581 | 0.402028    | 0.544683333 |
| Il17d         | chr14:58143665-58162003   | 0.401596667 | 0           |
| Slc30a10      | chr1:187278726-187292640  | 0.401313033 | 0           |
| 1700019L03Rik | chr2:32632932-32639925    | 0.401232333 | 2.31722     |
| Rhbdl2        | chr4:123465117-123507147  | 0.400916667 | 0.657662667 |
| Nudt17        | chr3:96509814-96512483    | 0.400294333 | 23.6758     |
| Tssk2         | chr16:17898729-17900117   | 0.399927333 | 0.47187     |
| C030039L03Rik | chr7:28459679-28491501    | 0.399812    | 0.297016333 |
| Lypd6         | chr2:49921948-50049089    | 0.399116667 | 1.896345    |
| Gdf7          | chr12:8304723-8308760     | 0.39892     | 0.50931     |
| Pdgfb         | chr15:79826305-79845238   | 0.3987916   | 7.731713333 |
| Mmp23         | chr4:155024763-155027493  | 0.398224    | 2.220093333 |
| 1700067G17Rik | chr1:90912687-90918785    | 0.397946667 | 0           |
| Gm13285       | chr4:88449157-88449706    | 0.3974449   | 0.030359267 |
| Kif17         | chr4:137818165-137857888  | 0.397244333 | 0.225317333 |
| Dlc1          | chr8:37630792-38015496    | 0.397099533 | 0.069182    |
| Prelp         | chr1:135806881-135817978  | 0.396823333 | 0.0760785   |
| Rerg          | chr6:137003345-137119017  | 0.396796133 | 0.6227963   |
| Cacng1        | chr11:107564531-107577790 | 0.39572     | 5.745033333 |
| 4632428N05Rik | chr10:59809598-59835432   | 0.394786167 | 2.327410667 |
| Fsd2          | chr7:88679239-88711867    | 0.39454     | 0           |
| Srl           | chr16:4480227-4523053     | 0.394519933 | 1.541286333 |
| Mak           | chr13:41120488-41175075   | 0.394098467 | 0.638627    |
| Xpnp2         | chrX:45461901-45490158    | 0.393032667 | 0.425040333 |
| Lgi1          | chr19:38339271-38383429   | 0.392756667 | 0.43692     |
| AU015836      | chrX:91213994-91220809    | 0.392106667 | 0           |
| 2810459M11Rik | chr1:87942437-87952031    | 0.391842333 | 0.013644467 |

|               |                           |             |             |
|---------------|---------------------------|-------------|-------------|
| Scube3        | chr17:28279470-28308290   | 0.391741    | 0.097187    |
| Gm8234        | chr3:58455963-58457963    | 0.391361367 | 0.119136    |
| Col23a1       | chr11:51103421-51397427   | 0.390899    | 3.069999667 |
| 5330417C22Rik | chr3:108260986-108339440  | 0.390803333 | 2.04595     |
| 1700101E01Rik | chr2:28811000-28910586    | 0.390293333 | 0           |
| Gm14685       | chrX:70368406-70374599    | 0.390176667 | 2.087036893 |
| 2210404O09Rik | chr17:22016536-22046893   | 0.389929667 | 1.606117667 |
| LOC627800     | chr10:91634045-91838118   | 0.389346    | 18.10499    |
| Casq1         | chr1:174140024-174150026  | 0.388879633 | 2.74196     |
| 2010109A12Rik | chr5:93635543-93642500    | 0.38777     | 1.260363333 |
| Olfr1393      | chr11:49093651-49094587   | 0.387603333 | 1.130366333 |
| Rras2         | chr7:121190295-121261295  | 0.387297    | 3.58566     |
| Emx1          | chr6:85137924-85154457    | 0.387154    | 2.67666     |
| 1700125D06Rik | chr4:129168433-129169200  | 0.386944    | 0.177498333 |
| Cmah          | chr13:24419288-24569154   | 0.38626     | 0.338149333 |
| Angptl3       | chr4:98697645-98704879    | 0.3862492   | 0.020147067 |
| Clstn3        | chr6:124380773-124414802  | 0.386181667 | 0.697547333 |
| Palb2         | chr7:129250778-129276460  | 0.386080333 | 0.189431    |
| Pars2         | chr4:106323673-106327887  | 0.385655667 | 0.740858667 |
| Ano8          | chr8:73999917-74009966    | 0.385566    | 2.179987    |
| Olfr706       | chr7:114029378-114030329  | 0.385336667 | 0           |
| Anks1b        | chr10:89336253-90435729   | 0.3849345   | 2.344152    |
| Vmn2r20       | chr6:123335279-123368079  | 0.384772667 | 0           |
| Gm13305       | chr4:42339259-42349021    | 0.384343667 | 0.341353667 |
| Gpr20         | chr15:73525036-73537935   | 0.38432     | 0           |
| D730048I06Rik | chr9:35595634-35597697    | 0.383952    | 0           |
| Ren2          | chr1:135247142-135256900  | 0.383117204 | 0.327631168 |
| Cml3          | chr6:85710624-85715738    | 0.382114367 | 0.522626667 |
| Ebi3          | chr17:56092045-56096445   | 0.381976667 | 2.133611    |
| Apof          | chr10:127705052-127707207 | 0.381646667 | 1.264598533 |
| Ltb4r2        | chr14:56380264-56382066   | 0.381543333 | 3.01429     |
| Art2a-ps      | chr7:108700966-108709379  | 0.381363333 | 0           |
| 4933430I17Rik | chr4:62186402-62209027    | 0.381345    | 0.106930667 |
| Cth           | chr3:157557211-157588027  | 0.3810926   | 0.421176333 |
| Adamts9       | chr6:92722692-92851435    | 0.380896333 | 0.1029661   |
| Adamts14      | chr10:60659859-60736186   | 0.380834333 | 0.339447    |
| Chgb          | chr2:132607013-132620808  | 0.38064     | 0.879064667 |
| H1foo         | chr6:115894956-115900251  | 0.380423333 | 4.5675      |
| E130309F12Rik | chr4:49072333-49353133    | 0.3803039   | 0           |
| Gm14308       | chr2:175737074-175750551  | 0.380242345 | 0.035391517 |
| Gm9112        | chrX:99902226-99903009    | 0.380086667 | 0           |
| F730035M05Rik | chr12:71328827-71335152   | 0.379853333 | 0           |
| Otos          | chr1:94540794-94545418    | 0.379836667 | 0.408773333 |
| Apln          | chrX:45378322-45388029    | 0.379632667 | 0.009558067 |
| Gm6525        | chr3:83978559-83979115    | 0.378796667 | 2.257426667 |
| Tcp10b        | chr17:13253976-13275092   | 0.378442467 | 2.00E-06    |
| Fkbp1         | chr17:34781827-34783272   | 0.377433    | 1.711247667 |
| Itgax         | chr7:135273081-135294171  | 0.3773912   | 0           |
| Tmem198       | chr1:75476106-75482268    | 0.377115667 | 0.560178    |
| Wisp1         | chr15:66722954-66754761   | 0.377023067 | 1.471750767 |
| Lamp3         | chr16:19653473-19706458   | 0.376898333 | 0.464254667 |
| Gm8898        | chr2:175917414-175930232  | 0.376486447 | 1.442133382 |

|               |                              |             |             |
|---------------|------------------------------|-------------|-------------|
| 1700016G22Rik | chr13:5854754-5857338        | 0.376431333 | 0.220122    |
| Gpr179        | chr11:97193422-97213387      | 0.375987567 | 0           |
| Dnase2a       | chr8:87432522-87435360       | 0.375861333 | 0.876578    |
| Csf1          | chr3:107543965-107563387     | 0.375646667 | 0.806692667 |
| Gm13305       | chr4:42669532-42679294       | 0.375254333 | 0.344084    |
| Ccl9          | chr11:83386418-83392138      | 0.375191667 | 0.516943333 |
| Col5a2        | chr1:45431175-45560127       | 0.3750381   | 0.210819067 |
| Fam83a        | chr15:57817457-57842257      | 0.374337333 | 3.056324433 |
| lrx1          | chr13:72095679-72101171      | 0.37433     | 0           |
| Shroom4       | chrX:5977262-6210835         | 0.374208333 | 0.034603733 |
| Htra3         | chr5:35994681-36022431       | 0.374163667 | 0           |
| Sash3         | chrX:45499703-45514740       | 0.373655667 | 0.446755333 |
| Cnr2          | chr4:135451318-135476125     | 0.373090333 | 0.546840333 |
| Olig2         | chr16:91225794-91228922      | 0.372675667 | 0           |
| Insm1         | chr2:146047732-146050754     | 0.372563333 | 2.334388    |
| Bcl6b         | chr11:70037628-70043300      | 0.372560333 | 0.179138333 |
| Ngef          | chr1:89373403-89470445       | 0.372250667 | 2.020398167 |
| Cdkn2b        | chr4:88952197-88956941       | 0.372088    | 2.173346    |
| Apol7a        | chr15:77218646-77229540      | 0.371292333 | 0           |
| Gnrh1         | chr14:68363285-68367493      | 0.3711131   | 5.74688     |
| Gucy2d        | chr7:105591931-105625988     | 0.371039    | 0.053998233 |
| 4930405A21Rik | chr2:156540274-156546645     | 0.370592333 | 0.107350667 |
| Cacna1d       | chr14:30853124-31304342      | 0.370217    | 0.270413933 |
| 1110065P20Rik | chr4:124526728-124527974     | 0.370044334 | 2.83454     |
| Nsl1          | chr1:192886899-192908437     | 0.369818843 | 0.108472067 |
| Ptpn22        | chr3:103664214-103716170     | 0.369764667 | 0.40077     |
| Gm14308       | chr2:176407550-176421027     | 0.369250806 | 0.038644934 |
| Plcd4         | chr1:74589462-74612551       | 0.368935333 | 0.186966667 |
| Galnt12       | chr14:32842288-32871512      | 0.36873     | 0.35581     |
| Gm14308       | chr2:175639523-175652992     | 0.36872858  | 0.071877021 |
| Lcn3          | chr2:25621088-25623619       | 0.36858     | 0           |
| Ptprn         | chr1:75243615-75260783       | 0.368344567 | 0.478898667 |
| Pcdhb3        | chr18:37460452-37464239      | 0.367450333 | 1.041623333 |
| Lipk          | chr19:34082743-34122393      | 0.367168667 | 0.016691933 |
| Sfxn4         | chr19:60913179-60937333      | 0.366827667 | 0.82763     |
| Tgfb2         | chr1:188447064-188529871     | 0.365381367 | 4.239293333 |
| Fam187a       | chr11:102746482-102748045    | 0.364891333 | 0           |
| Gpc2          | chr5:138714887-138721165     | 0.364742    | 9.155786667 |
| Acp5          | chr9:21931170-21940190       | 0.36443     | 4.308613333 |
| Lrtm2         | chr6:119265150-119280784     | 0.363679    | 6.269393333 |
| Tdh           | chr14:64111183-64127929      | 0.3636      | 0.040263333 |
| Gm410         | chr3:57471343-57496459       | 0.363246667 | 0.126914333 |
| Gm19757       | chr6:105431259-105442662     | 0.36317     | 0.090475067 |
| Gngt2         | chr11:95703608-95707045      | 0.362686667 | 0           |
| Tbr1          | chr2:61642509-61652170       | 0.36265     | 0.460179667 |
| Rac2          | chr15:78389598-78403213      | 0.362580333 | 0.030123367 |
| Cyp2r1        | chr7:121693681-121706486     | 0.361852333 | 0.0237747   |
|               | 5-Sep chrX:34451266-34529690 | 0.361678667 | 1.662094667 |
| Ccnb2         | chr9:70255495-70269361       | 0.361609933 | 1.318368333 |
| 2900057B20Rik | chr18:76251210-76258125      | 0.361383667 | 0.821125    |
| Csf2rb        | chr15:78156419-78181431      | 0.360994333 | 0.51786     |
| Rbl1          | chr2:156971629-157030270     | 0.3606216   | 2.1319      |

|               |                           |             |             |
|---------------|---------------------------|-------------|-------------|
| Abcc9         | chr6:142536381-142650794  | 0.360186667 | 0.398601667 |
| Pde3a         | chr6:141197789-141447872  | 0.359886667 | 0           |
| Clec4a2       | chr6:123072707-123094017  | 0.359876667 | 0           |
| Slc13a1       | chr6:24038282-24118092    | 0.359753667 | 0           |
| Map6d1        | chr16:20233381-20241431   | 0.35933     | 0           |
| Dtx4          | chr19:12540825-12576486   | 0.359092    | 0.790297667 |
| Hcrtr1        | chr4:129807460-129816406  | 0.356723333 | 0           |
| Best2         | chr8:87531101-87538307    | 0.356196667 | 0           |
| Ghrl          | chr6:113666112-113669874  | 0.356195    | 0.283540667 |
| Greb1l        | chr18:10325176-10562939   | 0.356115    | 0.480001067 |
| Fam154b       | chr7:89781469-89797038    | 0.355723333 | 2.276851567 |
| 2610206C17Rik | chr7:91838149-91925059    | 0.355614    | 0.739456333 |
| Gm13285       | chr4:88434535-88435084    | 0.355496667 | 0           |
| Gm10845       | chr14:80260327-80268983   | 0.354889    | 0.220851    |
| E330016A19Rik | chr9:78278324-78290954    | 0.3548078   | 1.001517    |
| Vmn2r1        | chr3:63885563-63909380    | 0.354733333 | 0.011104033 |
| 9930023K05Rik | chr19:56536126-56561219   | 0.354365    | 2.373054    |
| Ncs1          | chr2:31101442-31150991    | 0.354189333 | 6.87166     |
| 4930471M09Rik | chr6:91380453-91390848    | 0.354179667 | 0.467103333 |
| Klhdc8b       | chr9:108349969-108363912  | 0.354163767 | 4.982916667 |
| 9030204H09Rik | chr2:35674709-35678905    | 0.352996667 | 0           |
| Amhr2         | chr15:102275797-102285070 | 0.351332333 | 0.251765667 |
| Rab32         | chr10:10264836-10278005   | 0.351011333 | 5.13231     |
| Gipc3         | chr10:80800506-80806011   | 0.350766667 | 0           |
| Il22ra1       | chr4:135284073-135311298  | 0.349912667 | 1.312890667 |
| Elfn1         | chr5:140383896-140450678  | 0.349548667 | 0.061989    |
| Col4a6        | chrX:137599945-137908619  | 0.349536667 | 0.346002433 |
| Sytl4         | chrX:130470923-130516322  | 0.3491427   | 2.672373333 |
| 4933417G07Rik | chr3:55651026-55651987    | 0.34886     | 0.44885     |
| Kcnab1        | chr3:64913564-65182141    | 0.348209333 | 0.1757544   |
| Scn1a         | chr2:66108838-66278894    | 0.348198    | 0.1056932   |
| Scn3b         | chr9:40076800-40099203    | 0.347013633 | 0.984631667 |
| Olfml2b       | chr1:172574662-172612920  | 0.347007967 | 2.891998667 |
| Gjb4          | chr4:127028329-127031325  | 0.3468118   | 2.027516667 |
| Pla2g4f       | chr2:120125692-120139901  | 0.346391333 | 4.277633333 |
| Adcy8         | chr15:64530596-64753858   | 0.3462      | 0.270475167 |
| Xlr4c         | chrX:70479414-70488469    | 0.3459382   | 0.126080333 |
| Krtap5-2      | chr7:149360436-149361910  | 0.345396667 | 0           |
| Adamts5       | chr16:85858401-85901370   | 0.345319267 | 3.643263333 |
| Tmem82        | chr4:141170147-141174548  | 0.345257667 | 1.176794667 |
| Fam71d        | chr12:79792521-79835506   | 0.344353333 | 0.114423333 |
| Btnl2         | chr17:34491766-34506437   | 0.343555933 | 0           |
| Zbtb8b        | chr4:129103008-129118062  | 0.343157933 | 2.504086667 |
| Tmem151b      | chr17:45678888-45686626   | 0.342653333 | 0.023130267 |
| Dse           | chr10:33871198-33927357   | 0.342390667 | 0.6730649   |
| Lrfn2         | chr17:49071906-49236915   | 0.3422181   | 0.6442545   |
| Pvrl3         | chr16:46394970-46497080   | 0.341483333 | 0.177351333 |
| 3830431G21Rik | chr12:81793587-81825203   | 0.341396333 | 0.5109266   |
| 4930413G21Rik | chr7:130112571-130113973  | 0.340936667 | 0.103571667 |
| Fkbp1b        | chr12:4839979-4848401     | 0.34025     | 2.647096667 |
| 5730507C01Rik | chr12:18521315-18542060   | 0.340122    | 0.305680667 |
| Gpr30         | chr5:139899132-139903754  | 0.3399      | 0           |

|               |                           |             |             |
|---------------|---------------------------|-------------|-------------|
| Slc4a5        | chr6:83187368-83254939    | 0.338305933 | 0.198501333 |
| Naalad2       | chr9:18127464-18190372    | 0.338124667 | 0.054254667 |
| Cenpk         | chr13:105019034-105039697 | 0.338113    | 0.299105667 |
| Ccdc67        | chr9:15364307-15432377    | 0.337508267 | 2.633596667 |
| Ankrd61       | chr5:144651611-144655936  | 0.337250833 | 1.620204333 |
| Pdcl2         | chr5:76741170-76760136    | 0.336976667 | 0.037095333 |
| Ccdc151       | chr9:21794314-21807078    | 0.336589333 | 0.907543467 |
| Pxmp2         | chr5:110703304-110715187  | 0.336498    | 0           |
| Ly6c1         | chr15:74874447-74879267   | 0.336233    | 2.804446667 |
| Prr9          | chr3:91926125-91927869    | 0.335346667 | 1.440283333 |
| Gm20571       | chr2:144194718-144199073  | 0.33507     | 0           |
| Ankrd29       | chr18:12410865-12464229   | 0.334676667 | 0.637845    |
| Olfr68        | chr7:110925909-110926857  | 0.334396667 | 0           |
| Fcgr2b        | chr1:172890688-172906202  | 0.334209667 | 0.214704667 |
| 2810429I04Rik | chr13:3477548-3491644     | 0.33365     | 0           |
| Prrx1         | chr1:165175249-165243781  | 0.333590333 | 0.058983333 |
| Cmtm2b        | chr8:106846136-106854656  | 0.333346667 | 0           |
| 4930558K02Rik | chr1:163872219-163909767  | 0.332778333 | 0.055295333 |
| Ces2e         | chr8:107450159-107458572  | 0.331508667 | 0.023687833 |
| Gm2027        | chr12:45322342-45325367   | 0.331324333 | 0.169587667 |
| D6Erttd527e   | chr6:87054739-87062997    | 0.331176667 | 0           |
| 9130206I24Rik | chr4:114581893-114593723  | 0.330905367 | 2.461365733 |
| 4930555G01Rik | chr14:5153653-5162268     | 0.330803667 | 0.188086733 |
| Gm10584       | chr7:139507346-139509974  | 0.330748667 | 1.128777667 |
| Ramp2         | chr11:101107647-101109564 | 0.330629    | 0           |
| Fsbp          | chr4:11506808-11514949    | 0.330492203 | 1.196610048 |
| 9230110F15Rik | chr9:35645913-35651735    | 0.330417    | 0           |
| Vsig2         | chr9:37346839-37351790    | 0.329968267 | 0.766503333 |
| Phkg1         | chr5:130339310-130354954  | 0.329500333 | 0.228508    |
| Gm13285       | chr4:88422825-88423374    | 0.328612467 | 0.0170538   |
| Prss46        | chr9:110747009-110759026  | 0.328449667 | 0           |
| Nxn12         | chr13:51266393-51270556   | 0.328052333 | 4.166206333 |
| Wee2          | chr6:40392861-40416814    | 0.327252333 | 0           |
| A930038C07Rik | chr6:65621604-65656924    | 0.326976667 | 1.398346667 |
| Myo15         | chr11:60282840-60341870   | 0.326803    | 0.034945567 |
| Akr1c21       | chr13:4573320-4585789     | 0.326615333 | 0           |
| D830013O20Rik | chr12:74465061-74510550   | 0.32645     | 1.475536667 |
| Gm14308       | chr2:175247800-175261277  | 0.326028333 | 0.109228    |
| Mgl2          | chr11:69943858-69951044   | 0.325802333 | 0           |
| 2210010C17Rik | chr7:20522653-20536092    | 0.325074    | 0.35936     |
| Ccnb1         | chr13:101548693-101556441 | 0.324908633 | 1.35342     |
| Scml2         | chrX:157600703-157696145  | 0.324415183 | 1.86308     |
| Ttll8         | chr15:88744327-88784848   | 0.324334    | 0           |
| Kcnu1         | chr8:26960094-27048406    | 0.324105667 | 0.521646833 |
| Spag6         | chr16:16753108-16829456   | 0.3234525   | 0.7866806   |
| 4930526L06Rik | chr19:11271306-11374374   | 0.323440333 | 0           |
| Gm17821       | chr12:68757728-68770258   | 0.323268233 | 0.0899664   |
| Gpr27         | chr6:99642672-99643812    | 0.323227333 | 0.402856667 |
| Ppp4r4        | chr12:104770774-104852042 | 0.323213667 | 1.998123333 |
| F630110N24Rik | chr10:80820314-80826780   | 0.322946    | 3.05034     |
| Gm5771        | chr6:41342354-41347255    | 0.3228986   | 0           |
| Gpr85         | chr6:13785073-13789848    | 0.3228323   | 5.67511     |

|               |                           |             |             |
|---------------|---------------------------|-------------|-------------|
| Tnfsf13b      | chr8:10006632-10035999    | 0.322729333 | 0.251472067 |
| Acot12        | chr13:91881125-91925753   | 0.3226141   | 0           |
| Brip1         | chr11:85871637-86014695   | 0.3225448   | 0.133489733 |
| Kbtbd11       | chr8:15011024-15033332    | 0.3221411   | 0.595519667 |
| Tsks          | chr7:52198609-52213405    | 0.3211112   | 0.520696667 |
| Ncapg         | chr5:46061163-46091786    | 0.320975333 | 0.474626667 |
| Csl           | chr10:99220338-99222292   | 0.320772    | 0.27727     |
| Snurf         | chr7:67127386-67150042    | 0.320602667 | 0.258268667 |
| 4933417D19Rik | chr8:125758990-125766259  | 0.320517333 | 0.52827     |
| 3110047P20Rik | chr5:64040341-64201782    | 0.320369667 | 0.0169687   |
| Pcdhb9        | chr18:37560508-37563563   | 0.319492033 | 3.30644     |
| Limk1         | chr5:135131908-135164460  | 0.319338633 | 3.24949     |
| Slc16a1       | chr3:104442590-104462385  | 0.31904     | 2.4004      |
| Tmod1         | chr4:46052093-46128904    | 0.318951333 | 0.452797667 |
| St8sia5       | chr18:77424585-77494189   | 0.318769033 | 8.168486667 |
| Erbp4         | chr1:68086539-69154633    | 0.3186023   | 0           |
| Xlr3b         | chrX:70437517-70448269    | 0.318119633 | 1.84919     |
| Gm13889       | chr2:93795966-93797257    | 0.3181116   | 0           |
| Gm14482       | chrX:10895381-10895890    | 0.318038489 | 3.61E-06    |
| Bpifb9a       | chr2:154083614-154096979  | 0.317920333 | 0.064491    |
| Ptp4a3        | chr15:73553574-73589196   | 0.317897333 | 1.557173    |
| Arxes1        | chrX:132567905-132569485  | 0.317566333 | 3.093905967 |
| Slc41a2       | chr10:82693883-82800562   | 0.317449    | 0.869204333 |
| P2ry12        | chr3:59020192-59066753    | 0.317245    | 0.80011     |
| 4930513N10Rik | chr8:98330729-98345628    | 0.317217233 | 0.318231667 |
| Dnase1l2      | chr17:24577712-24580046   | 0.316788    | 11.4939     |
| Ccnjl         | chr11:43342285-43400499   | 0.316299333 | 3.490347667 |
| Klrg2         | chr6:38576659-38587239    | 0.316284333 | 4.270724    |
| Pole          | chr5:110715337-110766472  | 0.316206833 | 0.275420333 |
| Mip           | chr10:127662893-127668867 | 0.316171667 | 0           |
| Fancb         | chrX:161418523-161435204  | 0.315671333 | 0.872577    |
| Lca5l         | chr16:96380012-96413864   | 0.315634133 | 0.014379767 |
| Gm5414        | chr15:101454458-101458619 | 0.315502667 | 0.286618333 |
| Ptprz1        | chr6:22825501-23002916    | 0.315267333 | 2.984392    |
| Poc1a         | chr9:106183391-106252222  | 0.3152636   | 3.120361667 |
| Tex15         | chr8:34681015-34696057    | 0.3151407   | 0.475913667 |
| Gm9992        | chr17:7568060-7589654     | 0.314578033 | 0.157244667 |
| Brf2          | chr8:28234303-28239104    | 0.312921667 | 0.424885967 |
| Gm14482       | chrX:10898548-10899057    | 0.312383071 | 3.24E-06    |
| D330022K07Rik | chr8:46808678-46904651    | 0.312178667 | 0.62115     |
| 4933406I18Rik | chr7:121458992-121558675  | 0.311495333 | 0           |
| Loxl2         | chr14:70009282-70095641   | 0.311461333 | 0.351969667 |
| Fndc5         | chr4:128814303-128821837  | 0.310909    | 0.056344667 |
| 4930405A10Rik | chr14:23326395-23362020   | 0.310824667 | 2.812169667 |
| Rgs7bp        | chr13:105737232-105845010 | 0.310783    | 0           |
| Hrasls5       | chr19:7687058-7713728     | 0.310681333 | 0.235762333 |
| Ror1          | chr4:99768395-100115150   | 0.310527667 | 0.060570333 |
| Ccdc108       | chr1:74948653-74982173    | 0.310433    | 3.7421546   |
| Npas3         | chr12:54349663-55173162   | 0.310109667 | 0           |
| 9330159F19Rik | chr10:28931448-28950585   | 0.309902067 | 0.020669967 |
| Sdr16c5       | chr4:3923088-3946810      | 0.309841333 | 5.247453333 |
| D130043K22Rik | chr13:24936999-24993139   | 0.309780667 | 2.867126667 |

|               |                           |             |             |
|---------------|---------------------------|-------------|-------------|
| Col11a2       | chr17:34176381-34203187   | 0.309146    | 0.244398033 |
| Daf2          | chr1:132285104-132319576  | 0.308689667 | 0.797655333 |
| Gm10512       | chr17:13397907-13399077   | 0.308444133 | 0           |
| Gm6772        | chr12:88075318-88104745   | 0.308058233 | 0.918710333 |
| 2010107G12Rik | chr6:34895294-34927999    | 0.307922    | 5.281876667 |
| Mogat2        | chr7:106367593-106387121  | 0.307436667 | 0.082590033 |
| Klh123        | chr2:69660426-69674708    | 0.307046667 | 1.00326     |
| Gm13285       | chr4:88452089-88452638    | 0.306848333 | 0.002601461 |
| Cntnap5a      | chr1:117581713-118477251  | 0.306321333 | 0.011488033 |
| Stx2          | chr5:129490435-129514439  | 0.3059455   | 2.05763     |
| A630023A22Rik | chr14:34864315-34915940   | 0.305942667 | 0           |
| S1pr5         | chr9:21047360-21052887    | 0.303933    | 7.59548     |
| 4930474M22Rik | chr17:14526113-14535949   | 0.303764333 | 0           |
| Tgfbr3        | chr5:107535588-107718614  | 0.303179933 | 3.852436667 |
| Matn4         | chr2:164215128-164230660  | 0.302870333 | 0           |
| Gm13275       | chr4:88439645-88441201    | 0.3025465   | 0.363525433 |
| Kcnj10        | chr1:174271340-174304216  | 0.302467333 | 0.038832667 |
| Galr3         | chr15:78872314-78873988   | 0.301903667 | 1.467457    |
| Gm5441        | chr12:118472993-118575485 | 0.301771333 | 0           |
| Efnb3         | chr11:69367593-69373739   | 0.301700267 | 0.983862667 |
| Gm13305       | chr4:42029564-42039326    | 0.301602333 | 0.351753333 |
| Tex21         | chr12:77299676-77347733   | 0.301440333 | 0           |
| Dock2         | chr11:34126863-34597325   | 0.301056967 | 0.40931     |
| Dlx4          | chr11:95001760-95007115   | 0.3008315   | 3.787443333 |
| Fam19a1       | chr6:96063147-96607192    | 0.300437    | 0.387713333 |
| 4921507P07Rik | chr6:50523302-50546589    | 0.300334    | 0.013221633 |
| Ssxb9         | chrX:7944103-7952514      | 0.300237767 | 0.038303    |
| Pnpla1        | chr17:28995355-29027253   | 0.300195567 | 1.542579667 |
| LOC319574     | chr8:124969167-124975222  | 0.300019667 | 0.306421333 |
| 4933430H15Rik | chr3:87540844-87552545    | 0.300005    | 1.758213333 |
| Fancd2        | chr6:113481675-113546279  | 0.299394    | 0.633661    |
| Anubl1        | chr6:116214252-116279644  | 0.299323667 | 0.833413333 |
| Tle1          | chr4:71778175-71861953    | 0.298693    | 4.57479     |
| Spaca5        | chrX:20645531-20655089    | 0.298054333 | 0.065348    |
| 4933408N05Rik | chr8:116865060-116875378  | 0.297248333 | 0.695986667 |
| Ccdc142       | chr6:83051509-83059115    | 0.297238667 | 0.700492767 |
| Lpar4         | chrX:104115963-104129238  | 0.297166033 | 0           |
| BC024139      | chr15:75949947-75956986   | 0.297113    | 0.150957667 |
| Gnmt          | chr17:46862612-46866114   | 0.296636667 | 0.649273333 |
| Slc35f2       | chr9:53619341-53665968    | 0.296203333 | 0.310559433 |
| Abcb1b        | chr5:8798146-8866314      | 0.295746333 | 0.286436667 |
| Zfp583        | chr7:6267266-6282036      | 0.295437    | 2.09216     |
| A930005I04Rik | chr5:35258563-35266488    | 0.2952209   | 1.661766    |
| Gem           | chr4:11631593-11642140    | 0.2947815   | 0.492996667 |
| Nudt11        | chrX:5624624-5631869      | 0.294761333 | 0.972766    |
| 1700013G23Rik | chr11:59760393-59761649   | 0.294212    | 0           |
| Fjx1          | chr2:102289522-102291949  | 0.2940577   | 5.075963    |
| Bpifb1        | chr2:154016553-154046079  | 0.293595    | 0           |
| Gm13285       | chr4:88419897-88420446    | 0.293259467 | 0.023473533 |
| Cyp1a2        | chr9:57524743-57531462    | 0.292653433 | 0           |
| Asb5          | chr8:55635683-55673189    | 0.292122667 | 0           |
| Gm872         | chr10:92259501-92299091   | 0.291866333 | 0.1301276   |



|               |                           |             |             |
|---------------|---------------------------|-------------|-------------|
| Ptprq         | chr10:106954415-107157083 | 0.291471333 | 0.352283333 |
| Gm4477        | chr6:85657166-85657852    | 0.291378867 | 0           |
| Pecam1        | chr11:106515531-106576595 | 0.291358667 | 0           |
| Gm10782       | chr13:56464260-56470218   | 0.291278667 | 0           |
| Ccdc154       | chr17:25299405-25308858   | 0.291075833 | 0.720115    |
| 4930528A17Rik | chr4:21773473-21775595    | 0.291068667 | 0.194557    |
| 2410018L13Rik | chr12:22990696-23046943   | 0.290735    | 0.199810667 |
| Pard3b        | chr1:61685397-62688858    | 0.290333333 | 0.83189     |
| Gm15401       | chr6:72579281-72587711    | 0.290305333 | 0.899073333 |
| Prrx2         | chr2:30700886-30736767    | 0.289949667 | 0.952543333 |
| Alb           | chr5:90889914-90905629    | 0.289902333 | 0           |
| BC055324      | chr1:165884138-165924912  | 0.289888    | 0.910618333 |
| Cyp4f41-ps    | chr17:33087905-33102661   | 0.289796    | 0           |
| Myo1g         | chr11:6406550-6420961     | 0.289666333 | 0.0181346   |
| 4930546C10Rik | chr18:69049140-69111182   | 0.289624333 | 0           |
| Gm9999        | chr7:54232001-54243173    | 0.289557667 | 0.251742333 |
| Dhtkd1        | chr2:5819105-5863838      | 0.289411667 | 0           |
| Wfikkn1       | chr17:26014572-26017803   | 0.288844267 | 1.546427667 |
| Sucnr1        | chr3:59885790-59891488    | 0.288696667 | 1.104823333 |
| Gmpr          | chr13:45602837-45641750   | 0.2883339   | 1.860783667 |
| Jak3          | chr8:74200281-74214476    | 0.288249    | 0.63419     |
| Gm3434        | chr9:35941871-35943215    | 0.288157    | 0           |
| Kif4          | chrX:97821403-97922610    | 0.288118133 | 0.315476333 |
| E530011L22Rik | chr9:121665757-121669061  | 0.287724    | 3.816563333 |
| Cd300lg       | chr11:101902824-101916931 | 0.287552333 | 0.079636333 |
| 1700016K19Rik | chr11:75813413-75817071   | 0.286859667 | 21.0586     |
| Arhgef6       | chrX:54484661-54591906    | 0.286809667 | 0.450936667 |
| 1700054A03Rik | chr19:53150741-53158882   | 0.286288    | 0.049288667 |
| Ccbe1         | chr18:66216509-66451492   | 0.2862269   | 0.288994867 |
| Spon1         | chr7:120909511-121186889  | 0.286175667 | 0.786641667 |
| Dact3         | chr7:17460665-17472650    | 0.286061667 | 0.205577667 |
| Ranbp3l       | chr15:8918118-8997082     | 0.285870333 | 0.043682333 |
| Tnfrsf11a     | chr1:107677299-107744558  | 0.285788333 | 0.724566333 |
| Gins1         | chr2:150735329-150757016  | 0.285193333 | 1.688963333 |
| Plxnc1        | chr10:94253611-94407212   | 0.284997    | 0.156815667 |
| Apc2          | chr10:79764564-79781001   | 0.284957    | 0.536185667 |
| 4931403G20Rik | chr12:70944672-70954658   | 0.284852    | 1.932866667 |
| Lsm11         | chr11:45741770-45758437   | 0.284584133 | 1.984961    |
| A430107O13Rik | chr6:21935909-22205606    | 0.284155667 | 0           |
| 2310050B05Rik | chr10:80657435-80671115   | 0.283933667 | 0           |
| Ceacam10      | chr7:25562222-25569674    | 0.283553333 | 5.644442667 |
| Klhl38        | chr15:58146127-58155724   | 0.283467667 | 0.05611     |
| Hic1          | chr11:74978066-74983757   | 0.283416    | 0           |
| Ramp3         | chr11:6558535-6577478     | 0.282395    | 0           |
| 9430037G07Rik | chr9:88490162-88494081    | 0.282369833 | 0.060532867 |
| Raver1-fdx1l  | chr9:20871957-20896452    | 0.282313267 | 1.590065333 |
| C2cd4a        | chr9:67678338-67680137    | 0.282083    | 0.171892767 |
| Gsdmcl1       | chr15:63678863-63682497   | 0.2820746   | 0           |
| Atp2a1        | chr7:133589373-133606587  | 0.281075433 | 0.407158667 |
| Tbxa2r        | chr10:80791475-80797917   | 0.280987333 | 0           |
| Cacna1s       | chr1:137949477-138016399  | 0.2809412   | 0           |
| Syt12         | chr19:4445907-4477143     | 0.280748107 | 0.039586333 |

|               |                           |             |             |
|---------------|---------------------------|-------------|-------------|
| Gm10345       | chr15:76124863-76127326   | 0.280691033 | 0.187701333 |
| Fmo1          | chr1:164759691-164796679  | 0.280668    | 3.563758333 |
| Klk8          | chr7:51052946-51059192    | 0.280651333 | 4.813895333 |
| Chst1         | chr2:92439863-92455409    | 0.280575    | 0           |
| Fam19a5       | chr15:87374728-87589794   | 0.2804313   | 0.769541    |
| Fbln2         | chr6:91162757-91222534    | 0.280379633 | 0.221481333 |
| 2010106C02Rik | chr17:86684506-86686518   | 0.279869667 | 0.454441    |
| Brca2         | chr5:151325197-151372324  | 0.2797493   | 1.2468532   |
| Gm13276       | chr4:88430957-88432419    | 0.2794769   | 0.311787333 |
| Gm5151        | chr4:155108912-155114673  | 0.279343667 | 0.072139333 |
| Ptchd2        | chr4:147610965-147662074  | 0.278914333 | 0           |
| Fam195a       | chr17:26000642-26005683   | 0.278762333 | 0.347920333 |
| Cldn22        | chr8:48909835-48910829    | 0.278475667 | 0           |
| Slfn10-ps     | chr11:82841629-82854035   | 0.278465267 | 0           |
| Vmn2r24       | chr6:123728988-123766298  | 0.278194667 | 0           |
| Gm1078        | chr7:4916861-4922563      | 0.278185433 | 0.131197433 |
| 1700001J11Rik | chr9:39858142-39860610    | 0.278055    | 0.0994298   |
| Ldhc          | chr7:54116632-54133512    | 0.277835333 | 0.153200333 |
| Gm6498        | chr14:48818390-48848088   | 0.276920633 | 2.018402667 |
| Wdr27         | chr17:14955678-15080129   | 0.276542    | 0.7822      |
| Elmod1        | chr9:53759266-53823108    | 0.276322667 | 0.590110333 |
| Dlgap1        | chr17:70774131-71170753   | 0.276296667 | 1.318072667 |
| P4ha3         | chr7:107434029-107468209  | 0.276100333 | 0.606870867 |
| Rcvrn         | chr11:67508827-67516857   | 0.276064    | 0           |
| Gli3          | chr13:15555555-15821858   | 0.2759949   | 3.511246333 |
| Cck           | chr9:121398941-121404807  | 0.275273333 | 0           |
| 9230112D13Rik | chr14:35324806-35335987   | 0.275269333 | 0           |
| E2f7          | chr10:110182520-110224440 | 0.274589    | 0.322691767 |
| Pln           | chr10:53057491-53065805   | 0.274520333 | 0.0156967   |
| Tigit         | chr16:43648973-43664297   | 0.274429667 | 1.959094333 |
| Cep55         | chr19:38129514-38148915   | 0.273898667 | 1.704855    |
| Slc40a1       | chr1:45964914-45982439    | 0.273701    | 0.84888     |
| Htr4          | chr18:62483857-62627456   | 0.273499867 | 1.285836667 |
| Pus7l         | chr15:94353070-94373938   | 0.273202533 | 0.504418333 |
| 1700030C10Rik | chr12:20810252-20821640   | 0.272983833 | 0.3169733   |
| Fam71f1       | chr6:29269139-29286022    | 0.272419333 | 0           |
| F7            | chr8:13026033-13035809    | 0.272037333 | 1.362743633 |
| 0610010B08Rik | chr2:174952492-175261278  | 0.271835277 | 0.041368812 |
| Mum1l1        | chrX:135744582-135772874  | 0.271597667 | 0.060971667 |
| H2-T10        | chr17:36252815-36258389   | 0.271181333 | 0.992140667 |
| Gm6981        | chr9:51810165-51856810    | 0.2710665   | 1.662391667 |
| Ccdc18        | chr5:108561932-108661968  | 0.271039    | 1.447171667 |
| Arhgef10l     | chr4:140070399-140221820  | 0.270768633 | 0.741413    |
| Il34          | chr8:113265728-113329803  | 0.2701748   | 5.52068     |
| 4930404N11Rik | chr10:80826768-80828565   | 0.270161667 | 0.509305    |
| Bcl2a1d       | chr9:88618125-88626688    | 0.270144333 | 0           |
| C78339        | chr13:46764890-46771142   | 0.269728667 | 1.589567    |
| Gpr35         | chr1:94869695-94882968    | 0.2697026   | 0.69692     |
| Gpr114        | chr8:97447593-97467190    | 0.269616    | 0           |
| Il1f8         | chr2:24008691-24015623    | 0.269571    | 0.641804333 |
| Myt1l         | chr12:30213248-30608074   | 0.269356967 | 1.828097    |
| Alpk3         | chr7:88202485-88250498    | 0.269308667 | 0.540653333 |

|               |                           |             |             |
|---------------|---------------------------|-------------|-------------|
| Acbd7         | chr2:3253439-3258269      | 0.268864667 | 0.517953333 |
| Svep1         | chr4:58055667-58219468    | 0.2685603   | 0           |
| Slco1a5       | chr6:142182749-142271470  | 0.268531667 | 2.9201841   |
| AA543186      | chr2:25182969-25188091    | 0.2680317   | 1.308273    |
| 4933417A18Rik | chr13:35016277-35045065   | 0.267663667 | 0           |
| Fitm1         | chr14:56194510-56195789   | 0.267241    | 0           |
| Myoz3         | chr18:60733370-60751370   | 0.267038367 | 1.159125767 |
| Fbxo17        | chr7:29501808-29523159    | 0.266711    | 0.382956667 |
| E530001F21Rik | chrX:102359716-102360844  | 0.266583333 | 1.612633333 |
| 4930404H21Rik | chr7:140778706-140793798  | 0.266103333 | 0.039846    |
| Egfl8         | chr17:34750294-34752916   | 0.265287    | 3.470306667 |
| 9630013A20Rik | chr14:84858644-84876231   | 0.265092    | 0           |
| Angpt2        | chr8:18691336-18741551    | 0.26482     | 1.3285664   |
| Slamf9        | chr1:174405490-174408540  | 0.264615333 | 0           |
| Gm13275       | chr4:88445478-88447034    | 0.264559067 | 0.352735667 |
| Oip5          | chr2:119435267-119444241  | 0.264484233 | 1.157574333 |
| 4930488L21Rik | chr8:96335593-96337455    | 0.264258667 | 3.7878      |
| A730085K08Rik | chr9:122291139-122307919  | 0.263605667 | 0.709642    |
| Krt9          | chr11:100048094-100054560 | 0.263321333 | 0.0898      |
| Spats1        | chr17:45585885-45611887   | 0.263271    | 0.897412333 |
| Slc45a1       | chr4:150003504-150026283  | 0.263007667 | 2.963038333 |
| Krt27         | chr11:99206879-99212408   | 0.262799667 | 0.637705667 |
| Cyp2j8        | chr4:96111278-96174077    | 0.262492667 | 0.097488667 |
| 4930592I03Rik | chr18:83087796-83089952   | 0.262483    | 2.588256667 |
| 4933408B17Rik | chr18:34739499-34757122   | 0.262370667 | 0.349193    |
| Ccr1          | chr9:123876958-123883525  | 0.26236     | 0           |
| Mcoln2        | chr3:145812796-145858476  | 0.261692433 | 0           |
| Trim30d       | chr7:111618528-111656363  | 0.261676333 | 0.060021967 |
| U90926        | chr5:92638920-92644434    | 0.261636    | 0           |
| Cda           | chr4:137894442-137923870  | 0.261015667 | 1.819352333 |
| Gbp9          | chr5:105507412-105539311  | 0.260698333 | 0.116474333 |
| Nhedc1        | chr3:135011000-135060791  | 0.260507    | 0.013799967 |
| Fcamr         | chr1:132697478-132711317  | 0.260366667 | 0.258005333 |
| Gm18756       | chr7:15116002-15208415    | 0.260005667 | 0.665047333 |
| Cecr2         | chr6:120616438-120721209  | 0.2596871   | 2.324239333 |
| Cd93          | chr2:148262386-148269271  | 0.2596258   | 0.061724833 |
| Slc26a9       | chr1:133640598-133666982  | 0.259603733 | 4.026956667 |
| 4930583K01Rik | chr7:125387420-125389065  | 0.259542333 | 3.723233    |
| Slnf14-ps     | chr11:83088613-83100228   | 0.25942     | 0           |
| Unc13c        | chr9:73327230-73781374    | 0.259288333 | 0           |
| 1700120G07Rik | chr7:142383447-142387685  | 0.259157    | 0           |
| 4930579G24Rik | chr3:79433000-79436741    | 0.259148043 | 1.441774667 |
| 9530059O14Rik | chr9:122481618-122489765  | 0.2590525   | 1.010933333 |
| 2810403D21Rik | chrX:106029816-106082235  | 0.259024667 | 0.360323    |
| Fam194a       | chr3:58420221-58441129    | 0.258924367 | 0.288092    |
| 2610203C20Rik | chr9:41389421-41400570    | 0.258309333 | 1.466643333 |
| Adam11        | chr11:102622752-102641576 | 0.257754333 | 0.888445333 |
| Podxl         | chr6:31469492-31513937    | 0.257723967 | 3.521063    |
| Gm221         | chr10:5785429-5836669     | 0.257665    | 0.88481     |
| Rnft2         | chr5:118640744-118695034  | 0.256989333 | 5.396086667 |
| Plk1          | chr7:129302950-129313389  | 0.256442633 | 1.258593333 |
| Rab20         | chr8:11453976-11478499    | 0.255905667 | 0.186339667 |

|               |                           |             |             |
|---------------|---------------------------|-------------|-------------|
| Gast          | chr11:100195725-100198310 | 0.255462333 | 0           |
| Sdr16c6       | chr4:3983812-4004661      | 0.255064    | 3.843956333 |
| Nrg1          | chr8:32928499-33028675    | 0.254997767 | 2.475233333 |
| 4930467E23Rik | chr8:19729575-19753602    | 0.254888333 | 0.236700333 |
| Gm3448        | chr17:15132746-15147148   | 0.254877667 | 0.498742335 |
| 1700123I01Rik | chr19:6184409-6224219     | 0.253924933 | 0.196001333 |
| Tmie          | chr9:110768549-110782587  | 0.253289    | 0.449666767 |
| Glyctk        | chr9:106055190-106060469  | 0.253193333 | 0.1971409   |
| Efna3         | chr3:89118872-89126801    | 0.253134667 | 2.10276     |
| Scarf2        | chr16:17797374-17808380   | 0.252717    | 0.010878733 |
| Tspan11       | chr6:127837639-127903049  | 0.2524856   | 0.201867667 |
| Fn1           | chr1:71632096-71699745    | 0.2521436   | 0.037362667 |
| Myh6          | chr14:55560757-55585444   | 0.252090667 | 0.103238533 |
| Gdpd3         | chr7:133909927-133919159  | 0.251933    | 1.148265667 |
| Kcnj14        | chr7:53071836-53080117    | 0.251601    | 0           |
| Gm5465        | chr14:79851641-79854623   | 0.251563    | 0.655196667 |
| Vmn2r113      | chr17:23080150-23095781   | 0.251539    | 0           |
| Rasl10a       | chr11:4958130-4960386     | 0.251146333 | 1.123366667 |
| Trpm1         | chr7:71298720-71414645    | 0.251018867 | 0.330129433 |
| Cxcr5         | chr9:44319869-44334504    | 0.250895667 | 0.011676633 |
| Clrn1         | chr3:58649136-58689134    | 0.250740333 | 0           |
| Dna2          | chr10:62409776-62436936   | 0.250709667 | 0.330116    |
| Spaca4        | chr7:52980476-52981186    | 0.250184    | 0           |
| Kif11         | chr19:37450892-37496349   | 0.250054467 | 3.864603333 |
| Cyp17a1       | chr19:46741654-46747490   | 0.250036333 | 0           |
| Lrrc8c        | chr5:105948489-106037973  | 0.250013667 | 1.438805667 |
| Brc1          | chr11:101350077-101413269 | 0.249629033 | 2.134763    |
| Slc6a1        | chr6:114232628-114267519  | 0.249547667 | 0           |
| E130215H24Rik | chr2:150493229-150494668  | 0.249494667 | 0           |
| Lrrc16b       | chr14:56109929-56127101   | 0.248934333 | 1.991406667 |
| Tfap2e        | chr4:126393246-126413513  | 0.248793667 | 0.047092667 |
| Entpd8        | chr2:24935842-24941239    | 0.2483813   | 0.173864    |
| Igfbp7        | chr5:77778264-77837070    | 0.247316    | 7.327763333 |
| Iqcd          | chr5:121039031-121057122  | 0.247180967 | 0.577667    |
| Lrrn1         | chr6:107479719-107520222  | 0.246801333 | 0.2717403   |
| Pappa2        | chr1:160641861-160887569  | 0.2463      | 0           |
| Gpr52         | chr1:162506798-162507884  | 0.245936667 | 0           |
| Gm13286       | chr4:88403747-88404296    | 0.245627667 | 0.008290667 |
| Lingo4        | chr3:94203140-94208423    | 0.245038333 | 0.082200667 |
| Slfn2         | chr11:82878613-82884180   | 0.245016567 | 0           |
| Gm13285       | chr4:88437453-88438002    | 0.2448428   | 0.025452533 |
| Fmo9          | chr1:168592185-168611976  | 0.244634333 | 0.242683333 |
| Gatm          | chr2:122420208-122437013  | 0.243988    | 0           |
| Shcbp1        | chr8:4735979-4779534      | 0.243949333 | 0.245030333 |
| Ssxb1         | chrX:7990430-7999283      | 0.243289667 | 0.059761667 |
| Fam169a       | chr13:97837241-97899477   | 0.243028333 | 0.820097333 |
| Tmem132b      | chr5:126012787-126272953  | 0.242908667 | 0           |
| Gm4980        | chr7:106772576-106775613  | 0.2426727   | 0.083290333 |
| Gm128         | chr3:95040841-95045031    | 0.242545333 | 1.051810667 |
| Vipr1         | chr9:121551833-121582072  | 0.241877933 | 1.353161267 |
| Evc2          | chr5:37729716-37816293    | 0.241794    | 0.8547715   |
| 1700090G07Rik | chr17:87316687-87321707   | 0.241732667 | 0           |

|               |                           |             |             |
|---------------|---------------------------|-------------|-------------|
| Nlrp1a        | chr11:70904698-70958206   | 0.240835233 | 0.016579267 |
| Olfrc692      | chr7:112516841-112517831  | 0.240505667 | 0           |
| Hmga2         | chr10:119798330-119913991 | 0.240259067 | 0.059444633 |
| Htra1         | chr7:138079716-138129172  | 0.240054033 | 0.445283333 |
| Rufy4         | chr1:74172114-74194804    | 0.239672    | 0           |
| Slc29a1       | chr17:45722148-45736552   | 0.239641667 | 0.808815    |
| Fam105a       | chr15:27584825-27611297   | 0.239262667 | 0.715766333 |
| Gbp2          | chr3:142283626-142300972  | 0.239095667 | 0.0274926   |
| 4933401P06Rik | chr5:37264833-37268118    | 0.238568333 | 0.591966667 |
| LOC545691     | chr4:141538906-141542712  | 0.238365667 | 0.035692667 |
| Pag1          | chr3:9687481-9833679      | 0.2381667   | 1.586375867 |
| Pcdhb1        | chr18:37424651-37427108   | 0.2378414   | 0.151546333 |
| Itgb8         | chr12:120401275-120476749 | 0.237710967 | 2.107647033 |
| Apol9b        | chr15:77559501-77566812   | 0.237696667 | 0.535386333 |
| Tacr1         | chr6:82352468-82510098    | 0.237327    | 0.174604333 |
| Raet1c        | chr10:21893707-22093945   | 0.237215612 | 0           |
| Plac8l1       | chr18:42338328-42356363   | 0.236921667 | 0           |
| Gm13807       | chr2:93243703-93257987    | 0.236798667 | 0.378205333 |
| Ctf2          | chr7:134862473-134869130  | 0.236475333 | 0.081425    |
| Iqch          | chr9:63269427-63450255    | 0.236293267 | 0.143253433 |
| Eln           | chr5:135178465-135223124  | 0.236072333 | 3.327583333 |
| Peg3          | chr7:6658670-6683130      | 0.235892267 | 6.650813333 |
| Epha8         | chr4:136485333-136512731  | 0.235875    | 0           |
| Sifn9         | chr11:82793804-82805332   | 0.2356      | 0.323395    |
| Itln1         | chr1:173448254-173465425  | 0.235571    | 4.8376      |
| Lpar3         | chr3:145883924-145949178  | 0.235012333 | 0.373591333 |
| Peg12         | chr7:69606756-69609396    | 0.234936667 | 0           |
| Gpm6a         | chr8:55864786-56146231    | 0.234744033 | 4.242373333 |
| B930007M17Rik | chr3:138868856-139373263  | 0.234535667 | 0           |
| Accn3         | chr5:23919268-23923652    | 0.234311333 | 0.064858667 |
| Icam2         | chr11:106238969-106243955 | 0.234239    | 2.25967     |
| 4930519F09Rik | chr10:28641768-28643313   | 0.233707667 | 0.170967167 |
| Cd8a          | chr6:71323420-71329165    | 0.232950333 | 0.520375133 |
| A530032D15Rik | chr1:85084713-85106428    | 0.232397867 | 0.706441    |
| Pcdha7        | chr18:37133577-37347311   | 0.232388345 | 2.65E-08    |
| P2rx1         | chr11:72812646-72828699   | 0.232381667 | 0.898702167 |
| Tdrd1         | chr19:56900698-56944502   | 0.232189667 | 1.009939633 |
| Igfbp4        | chr11:98902573-98913957   | 0.232110333 | 3.158083333 |
| 4933401H06Rik | chr3:135496657-135503233  | 0.232095333 | 1.114502667 |
| BC055111      | chr4:106263513-106289843  | 0.231706667 | 1.434546667 |
| Kctd19        | chr8:107906711-107937387  | 0.231526    | 0           |
| Gm17359       | chr3:79149297-79268050    | 0.231068333 | 0           |
| BC048546      | chr6:128489839-128531624  | 0.230661133 | 2.828073333 |
| Slc4a4        | chr5:89316284-89668681    | 0.230630667 | 1.272713667 |
| C230035I16Rik | chr13:23519844-23522886   | 0.230547667 | 4.2375      |
| Gm14308       | chr2:175150243-175163712  | 0.230469325 | 1.34E-05    |
| Slc19a3       | chr1:83009097-83035023    | 0.230266    | 2.413159833 |
| Celf3         | chr3:94282752-94296115    | 0.230113333 | 4.19541     |
| Acox2         | chr14:9058024-9091533     | 0.230078467 | 2.35316     |
| Aldh1b1       | chr4:45811893-45817480    | 0.230047967 | 0.464234    |
| Prss22        | chr17:24130500-24135067   | 0.229826    | 0.025212433 |
| Gng2          | chr14:20691780-20796471   | 0.229523667 | 0.583113333 |

|               |                           |             |             |
|---------------|---------------------------|-------------|-------------|
| 1700048M11Rik | chr16:92308960-92312711   | 0.22923     | 2.016503333 |
| Fam189a2      | chr19:24047239-24105509   | 0.229122433 | 0.300282    |
| Sybu          | chr15:44503402-44619609   | 0.2290775   | 0.335353    |
| Igfn1         | chr1:137850154-137902919  | 0.229057067 | 0.053595    |
| Dll4          | chr2:119151519-119161402  | 0.228964    | 4.325273333 |
| Bnc1          | chr7:89111547-89137185    | 0.228879867 | 0.107598333 |
| Gm7609        | chr1:85196185-85210337    | 0.228475333 | 0.765474333 |
| Chga          | chr12:103793178-103803237 | 0.228110333 | 1.011119633 |
| Fut10         | chr8:32297803-32371955    | 0.227154333 | 0.585433333 |
| Fam57b        | chr7:133960398-133973733  | 0.226940333 | 0           |
| Cfc1          | chr1:34592492-34601156    | 0.226558    | 8.914223333 |
| Col18a1       | chr10:76514923-76629275   | 0.226370667 | 1.156010333 |
| Bfsp2         | chr9:103327253-103382658  | 0.226263    | 3.23E-06    |
| Oog1          | chr12:88943637-88949795   | 0.226055667 | 0.714925    |
| Slc16a9       | chr10:69708023-69748699   | 0.225974867 | 1.043815667 |
| Muc19         | chr15:91668756-91764986   | 0.2258613   | 0.015126933 |
| Mamdc4        | chr2:25418634-25426836    | 0.225726667 | 2.978156667 |
| Gm11648       | chr11:103206066-103211440 | 0.225670667 | 1.231924    |
| Dnahc10       | chr5:125205454-125314678  | 0.22510864  | 0.963645333 |
| Neb           | chr2:51992166-52194318    | 0.225038867 | 0.516934333 |
| Olfr1006      | chr2:85514367-85518898    | 0.224788667 | 0           |
| Il17re        | chr6:113408477-113420745  | 0.224432667 | 1.865380333 |
| Masp2         | chr4:147976652-147989589  | 0.224396    | 0.285383667 |
| Ern2          | chr7:129313406-129329730  | 0.224300667 | 0.865007833 |
| Glt8d2        | chr10:82113177-82153395   | 0.224116    | 0.266713233 |
| Celf5         | chr10:80921972-80945454   | 0.2236754   | 7.98996     |
| Cubn          | chr2:13197964-13413503    | 0.223380633 | 0.015157533 |
| Gm9705        | chr17:32758263-32773129   | 0.223374033 | 0.062251833 |
| Spnb4         | chr7:28141401-28231608    | 0.223343833 | 0.080944833 |
| Tmem130       | chr5:145496783-145522447  | 0.222908667 | 0.560342    |
| Aknad1        | chr3:108542575-108585227  | 0.222730233 | 0.228893733 |
| Cxcl12        | chr6:117118552-117131386  | 0.222117333 | 0           |
| Gk2           | chr5:97884179-97886027    | 0.221767933 | 0.301392    |
| Abca6         | chr11:110038135-110113090 | 0.221661    | 0.109316333 |
| Cpt1b         | chr15:89246835-89256293   | 0.221660333 | 0.410810513 |
| Stxbp6        | chr12:45953472-46175470   | 0.221579    | 0.287515    |
| Muc5b         | chr7:149024976-149058990  | 0.221065133 | 4.134814667 |
| Olfr881       | chr9:37800076-37801024    | 0.219871333 | 0           |
| Tnfsf15       | chr4:63385636-63406147    | 0.21969     | 0           |
| Pth1r         | chr9:110624588-110649649  | 0.219651667 | 0.6437537   |
| Slc1a1        | chr19:28909655-28988450   | 0.219533333 | 0.032111033 |
| 2810055G20Rik | chr16:77329572-77558673   | 0.219520333 | 2.287426633 |
| Ect2l         | chr10:17848827-17930696   | 0.2195037   | 0.534524667 |
| Rnd1          | chr15:98499635-98507892   | 0.219037    | 0.524148567 |
| Aplnr         | chr2:84976516-84980080    | 0.218838    | 0           |
| Rasd1         | chr11:59776684-59778444   | 0.218754333 | 1.3282961   |
| Ces1c         | chr8:95622914-95655182    | 0.2185132   | 0.13618     |
| Crb1          | chr1:141094830-141273653  | 0.218217333 | 0.916589333 |
| Klhl10        | chr11:100303237-100318338 | 0.218031667 | 0.345777    |
| Gm8179        | chr8:33262366-33292319    | 0.217818333 | 0.200178    |
| Pbld1         | chr10:62524364-62540284   | 0.217677633 | 0.107726567 |
| Higd1c        | chr15:100195015-100214386 | 0.216819    | 0           |

|               |                           |             |             |
|---------------|---------------------------|-------------|-------------|
| Gpx8          | chr13:113832970-113836596 | 0.216697333 | 0.85673     |
| Tmem171       | chr13:99456192-99464786   | 0.215803333 | 0.035603333 |
| Unc93a        | chr17:13301482-13324657   | 0.215711333 | 0.064623867 |
| Zfp957        | chr14:79612161-79647174   | 0.215550667 | 0.026476033 |
| Amz1          | chr5:141200080-141229266  | 0.215276333 | 0.054364333 |
| Gnb1l         | chr16:18498860-18566772   | 0.2148169   | 0.230990667 |
| D730039F16Rik | chr2:34729955-34747653    | 0.214683    | 0.944186667 |
| Dtl           | chr1:193361243-193399413  | 0.214504    | 1.206358733 |
| Prok1         | chr3:107038448-107042625  | 0.214268    | 0           |
| Dok7          | chr5:35399732-35430480    | 0.214100667 | 1.331053333 |
| Ddr2          | chr1:171902437-172019075  | 0.214058267 | 0           |
| Abcg5         | chr17:85057573-85082263   | 0.213858033 | 0           |
| Gabrr2        | chr4:33150086-33182840    | 0.213571    | 0           |
| Nup210l       | chr3:89908053-90015939    | 0.213247667 | 0.632716    |
| Arap3         | chr18:38132276-38158623   | 0.2125205   | 0           |
| Foxj1         | chr11:116192017-116196668 | 0.212486633 | 5.766301933 |
| Pde4a         | chr9:20970157-21017692    | 0.212023667 | 0.635618767 |
| Gm8787        | chrX:76575851-76603407    | 0.211941333 | 0.90447     |
| Gm14308       | chr2:176266769-176280240  | 0.211733193 | 1.27E-05    |
| Ccnf          | chr17:24360176-24388354   | 0.211720667 | 0.344052767 |
| Ampd1         | chr3:102877936-102903643  | 0.210819333 | 0.415723667 |
| Ccna1         | chr3:54849390-54858977    | 0.210529667 | 8.783966667 |
| Fbxl13        | chr5:20989664-21151423    | 0.210124667 | 0           |
| 4930443O20Rik | chr2:84913770-84926618    | 0.210118033 | 0.49113     |
| Slc37a2       | chr9:37036733-37063323    | 0.209911    | 0.51826     |
| Acsm4         | chr7:126833539-126858080  | 0.209879667 | 0           |
| Lrwd1         | chr5:136598935-136611944  | 0.209479667 | 5.922273333 |
| Depdc1a       | chr3:159158396-159192919  | 0.209292667 | 0.539172333 |
| Ugt1a5        | chr1:90062586-90116577    | 0.209275431 | 0.323964    |
| Fam38b        | chr18:63169866-63546837   | 0.209176233 | 0.341843333 |
| Mtl5          | chr19:3388868-3407785     | 0.209165667 | 0.1843747   |
| Tm4sf19       | chr16:32400591-32408313   | 0.209013333 | 0           |
| Lrrn3         | chr12:42178254-42212338   | 0.208498667 | 3.295096667 |
| 2010109I03Rik | chr15:74708765-74712134   | 0.208254667 | 3.340622667 |
| Clec4n        | chr6:123179860-123197042  | 0.207913333 | 0.030102367 |
| Aox3          | chr1:58169979-58257296    | 0.207634    | 1.544253333 |
| Pdzrn4        | chr15:92227240-92602250   | 0.207461333 | 0           |
| Zeb2          | chr2:44839153-44968799    | 0.207363667 | 0.006307867 |
| Acmsd         | chr1:129625989-129664141  | 0.2071966   | 0           |
| Igsf10        | chr3:59120656-59148178    | 0.207148    | 0.1115664   |
| Fsip1         | chr2:118030623-118082702  | 0.206918533 | 0.69108     |
| Ccdc69        | chr11:54863239-54891633   | 0.206414    | 0.151365667 |
| Nrap          | chr19:56394531-56464525   | 0.206174667 | 0           |
| Tmed6         | chr8:109585383-109589544  | 0.206122333 | 0.456453333 |
| 1700027J07Rik | chr10:43465963-43485642   | 0.205475667 | 0           |
| Zfp454        | chr11:50686224-50700945   | 0.205436    | 3.068758667 |
| Slc5a2        | chr7:135409210-135415947  | 0.204855357 | 0.025964825 |
| Col4a5        | chrX:137909961-138123778  | 0.204742    | 1.094898    |
| Lyzl1         | chr18:4165829-4182234     | 0.204698667 | 0           |
| Gsdmc2        | chr15:63655900-63676731   | 0.204621333 | 0.2888154   |
| Pde4c         | chr8:73247962-73275075    | 0.204084567 | 0.405946667 |
| Snai3         | chr8:124978105-124984592  | 0.204018    | 0.768704667 |

|               |                           |             |             |
|---------------|---------------------------|-------------|-------------|
| Klf15         | chr6:90412619-90425203    | 0.203522867 | 0.191031133 |
| Awat2         | chrX:97597560-97607901    | 0.203428    | 1.087026333 |
| Enpep         | chr3:128972094-129035667  | 0.203261    | 1.817263333 |
| Elavl2        | chr4:90917456-91066675    | 0.203242667 | 1.286765667 |
| A230020J21Rik | chr1:192849229-192853660  | 0.2030934   | 0.02460191  |
| Ldb3          | chr14:35339884-35401867   | 0.202992667 | 0.147815    |
| Ccdc14        | chr16:34690701-34725280   | 0.202814833 | 0.642836333 |
| Cyp4b1        | chr4:115297332-115320310  | 0.202797967 | 0           |
| Onecut1       | chr9:74709727-74737454    | 0.202262    | 0           |
| Tmem52        | chr4:154843222-154844967  | 0.201578667 | 0.722369333 |
| H2-Oa         | chr17:34229323-34232179   | 0.201100333 | 0           |
| Lrrc10        | chr10:116482396-116483824 | 0.200905    | 0.069902667 |
| Kcnq5         | chr1:21388483-21952023    | 0.200605    | 0.234097    |
| Gstm3         | chr3:107766613-107772092  | 0.200572    | 1.6358339   |
| Bean1         | chr8:106694412-106742997  | 0.200216567 | 2.454226667 |
| Tmprss7       | chr16:45656429-45693771   | 0.199154    | 0           |
| Camk4         | chr18:33098694-33355421   | 0.198750367 | 1.385443333 |
| Slc29a4       | chr5:143178054-143198443  | 0.198721433 | 0.410480333 |
| Gm11128       | chr6:85758044-85759871    | 0.1986487   | 0           |
| Prph2         | chr17:47047433-47061875   | 0.198108433 | 0           |
| A830019L24Rik | chr3:142906018-142920960  | 0.197971    | 0           |
| Fam72a        | chr1:133424565-133436449  | 0.197940333 | 0           |
| Tmem116       | chr5:121902717-121945430  | 0.197823    | 0           |
| 1110008J03Rik | chr5:121059068-121062598  | 0.1974503   | 5.081736667 |
| Gm6377        | chrX:106392094-106395784  | 0.197248433 | 0.194854667 |
| Melk          | chr4:44313788-44377547    | 0.1971099   | 1.149629667 |
| Gm13290       | chr4:88419737-88420705    | 0.197055372 | 0.020580733 |
| Clrn3         | chr7:142703138-142720337  | 0.196991    | 0.925765    |
| 4930444F02Rik | chr10:18517104-18551736   | 0.196915333 | 0.542179    |
| Fbln7         | chr2:128689667-128722770  | 0.196873    | 0           |
| Prox2         | chr12:86427763-86447381   | 0.196862667 | 0.323941533 |
| Sbpl          | chr17:24090051-24092240   | 0.196703667 | 0           |
| Arsi          | chr18:61071893-61077422   | 0.196409    | 0.526554667 |
| Myh7          | chr14:55589524-55613386   | 0.195842    | 0           |
| Gbx2          | chr1:91824536-91827751    | 0.195770667 | 0.043971667 |
| Inf2          | chr12:113826994-113853768 | 0.1957044   | 0.309422333 |
| Fcer2a        | chr8:3681736-3694174      | 0.195673633 | 0           |
| Kcnt1         | chr2:25719373-25773793    | 0.195593333 | 0.651750533 |
| Cacna2d4      | chr6:119186543-119302425  | 0.1951385   | 0.026096167 |
| Vmn2r46       | chr7:8317008-8332944      | 0.195107233 | 0.375124467 |
| Esco2         | chr14:66437863-66452806   | 0.194803667 | 0.104432333 |
| Pld4          | chr12:113998865-114007197 | 0.1945844   | 0.994892333 |
| 28-Feb        | chr8:68141938-68995536    | 0.194503667 | 0.214630333 |
| Mcam          | chr9:43942740-43950809    | 0.194439567 | 1.291706    |
| Lrrn4         | chr2:132694251-132706598  | 0.1931682   | 99.4069     |
| Myh7b         | chr2:155436947-155460043  | 0.193136733 | 0.158639    |
| Aqp4          | chr18:15547902-15562193   | 0.193083033 | 8.605066667 |
| Casc5         | chr2:118872854-118929857  | 0.192964    | 2.853416667 |
| Cldn24        | chr8:48907496-48908159    | 0.192839667 | 0           |
| Pcdha8        | chr18:37152120-37347311   | 0.192431533 | 0.090987018 |
| Nrtn          | chr17:56890747-56896953   | 0.192283    | 0.324627    |
| Npc1l1        | chr11:6111013-6130248     | 0.1920693   | 1.067152    |



|               |                           |             |             |
|---------------|---------------------------|-------------|-------------|
| LOC100504608  | chr10:126469960-126478450 | 0.191861667 | 0.206477333 |
| Slc22a4       | chr11:53796627-53841592   | 0.191651    | 2.750686667 |
| Slc7a9        | chr7:36234110-36251053    | 0.191555667 | 0           |
| Sarm1         | chr11:78285831-78311256   | 0.1914204   | 0.142144667 |
| Nostrin       | chr2:68973856-69027386    | 0.191353    | 1.099603333 |
| Palm2         | chr4:57581119-57730000    | 0.191322    | 0.008846667 |
| Pygm          | chr19:6384428-6398459     | 0.1908916   | 0.063852667 |
| Gm10190       | chr17:80771196-80772882   | 0.190607333 | 0.274140333 |
| Slc22a13      | chr9:119102095-119118223  | 0.1905636   | 0.120120667 |
| Lrdd          | chr7:148624413-148629254  | 0.190322    | 1.896556667 |
| Ifi205        | chr1:175942128-175961886  | 0.189870333 | 0.0100089   |
| Apobr         | chr7:133728521-133732606  | 0.189861667 | 0           |
| Mrap2         | chr9:87039140-87078880    | 0.189757567 | 0.802153333 |
| Vamp5         | chr6:72318042-72330462    | 0.189746333 | 0.191054    |
| 1700008P20Rik | chr7:25118098-25118984    | 0.189538667 | 0           |
| Chrna1        | chr2:73401337-73418363    | 0.1889966   | 0.034609033 |
| Guca1a        | chr17:47531506-47537533   | 0.188645667 | 0.720313333 |
| Tnfsf18       | chr1:163424787-163435421  | 0.188369333 | 0.757663333 |
| A730036I17Rik | chr2:129044704-129061342  | 0.188272667 | 0.274985333 |
| Shf           | chr2:122174627-122194654  | 0.187923333 | 0           |
| Cox7b2        | chr5:71834061-71939444    | 0.187887    | 1.434833333 |
| Acsf6         | chr11:54117325-54175041   | 0.18724     | 0.810207333 |
| 1700010I14Rik | chr17:9181197-9201184     | 0.187082667 | 0.303064    |
| Dnahc2        | chr11:69234310-69362610   | 0.187061    | 0.0976655   |
| Oog1          | chr12:89192946-89199120   | 0.187048667 | 0.785219667 |
| 4930525F21Rik | chr2:125809363-125971987  | 0.187029967 | 0           |
| Sypl2         | chr3:108015183-108029517  | 0.186852333 | 0.022151533 |
| Cenpi         | chrX:130842701-130897178  | 0.186421    | 0.143371    |
| Bpifb5        | chr2:154049477-154066638  | 0.186077233 | 0           |
| Pate4         | chr9:35414677-35419470    | 0.18593     | 0.80157     |
| Adcy10        | chr1:167415313-167506904  | 0.1857002   | 0.017962833 |
| Prdm16        | chr4:153690233-154010982  | 0.185374667 | 0.1408516   |
| Nox3          | chr17:3635239-3696261     | 0.1853316   | 0           |
| Mnda          | chr1:175826485-175843053  | 0.184862333 | 0.0097449   |
| Vmn2r46       | chr7:10339984-10355920    | 0.184733233 | 0.427908667 |
| Impg2         | chr16:56204425-56273866   | 0.1846077   | 0.0168909   |
| Prex1         | chr2:166391844-166539332  | 0.184599333 | 6.97071     |
| Shank2        | chr7:151361424-151608580  | 0.1845353   | 0.321052467 |
| Hk3           | chr13:55107345-55122746   | 0.184509667 | 0.012006767 |
| D430041D05Rik | chr2:103983231-104250491  | 0.184170633 | 0           |
| Col4a2        | chr8:11312828-11449287    | 0.1841334   | 0.006847133 |
| Emilin1       | chr5:31216158-31223646    | 0.183996033 | 0.289204933 |
| Fstl4         | chr11:52578207-53000849   | 0.183961333 | 0.01932     |
| 4930429F24Rik | chr9:79641447-79651042    | 0.1837732   | 0.55742     |
| Pou1f1        | chr16:65520963-65534316   | 0.183751    | 0.421803333 |
| Ghsr          | chr3:27270272-27276932    | 0.183458    | 0           |
| Oas3          | chr5:121203106-121227668  | 0.183293333 | 0.352253667 |
| 4931429I11Rik | chr9:40702931-40772195    | 0.183283    | 0.176861333 |
| 4930432K21Rik | chr8:86671936-86696496    | 0.1829388   | 0           |
| Vstm2a        | chr11:16157726-16184554   | 0.182679    | 0.233132333 |
| Shmt1         | chr11:60602398-60624767   | 0.182455333 | 0.559663    |
| 6030446N20Rik | chr18:12140447-12279962   | 0.1824236   | 1.785913333 |

|               |                           |             |             |
|---------------|---------------------------|-------------|-------------|
| Caly          | chr7:147255778-147268447  | 0.182249333 | 0.296657333 |
| Tnfaip8l2     | chr3:94943442-94946282    | 0.182044667 | 0.516486667 |
| Aff3          | chr1:38234171-38721800    | 0.181762333 | 5.848046667 |
| Gm7904        | chr9:21411530-21412773    | 0.181583    | 1.528581333 |
| Pla2g4c       | chr7:13911015-13946017    | 0.181500667 | 0           |
| Angpt1        | chr15:42256270-42508341   | 0.181395333 | 0           |
| Tat           | chr8:112514335-112523704  | 0.181302    | 0           |
| Phox2a        | chr7:108966826-108971240  | 0.181300333 | 0.020089    |
| Slc25a43      | chrX:34283653-34317197    | 0.181076667 | 0           |
| D17H6S56E-3   | chr17:35153523-35163686   | 0.1810521   | 0.714484667 |
| Sult4a1       | chr15:83906526-83936184   | 0.181047333 | 0.0258469   |
| Al854703      | chr6:48578165-48583687    | 0.180647    | 0.078364033 |
| Cd53          | chr3:106561778-106593067  | 0.1804709   | 1.220236667 |
| Tmprss11f     | chr5:86950250-87061449    | 0.180469667 | 0.0082705   |
| Akr1b8        | chr6:34304163-34318454    | 0.18016     | 7.789406033 |
| 1700084J12Rik | chr15:33334963-33335694   | 0.180070333 | 0.808903333 |
| Capn8         | chr1:184495137-184562483  | 0.179991667 | 1.577782    |
| 3632454L22Rik | chrX:131556960-131594875  | 0.179969333 | 0           |
| Scn9a         | chr2:66318137-66473009    | 0.1795427   | 0.302339433 |
| Tmem200a      | chr10:25710991-25798858   | 0.1792608   | 1.863083333 |
| Lpxn          | chr19:12873098-12908298   | 0.179043    | 0.134169    |
| Olfir267      | chr4:58797650-58798592    | 0.178960333 | 0           |
| Gm1568        | chr12:81856433-81861702   | 0.178128733 | 0.241250667 |
| Cmklr1        | chr5:114062363-114100399  | 0.177931333 | 0           |
| Xlr3c         | chrX:70499878-70510729    | 0.177816    | 0.555440667 |
| Npr3          | chr15:11769651-11835429   | 0.177783333 | 0.076856667 |
| Ppp1r3c       | chr19:36806220-36811094   | 0.177451667 | 1.316225333 |
| Mab21l2       | chr3:86349502-86352205    | 0.177261567 | 0.495633333 |
| Htr6          | chr4:138617323-138630704  | 0.177015333 | 0.331055333 |
| Krt39         | chr11:99375937-99382572   | 0.176615333 | 0           |
| Smad9         | chr3:54559503-54605179    | 0.176526333 | 0.181147667 |
| Vcan          | chr13:89794914-89882117   | 0.176236333 | 0.47769     |
| Plxdc1        | chr11:97784550-97847760   | 0.176233333 | 0.063667667 |
| Meig1         | chr2:3326314-3339920      | 0.176111    | 1.925993333 |
| Heph          | chrX:93650774-93769823    | 0.176052    | 1.173154333 |
| Fap           | chr2:62339001-62412078    | 0.175664667 | 0.013536367 |
| Spag17        | chr3:99689339-99947245    | 0.175162767 | 0.554106667 |
| 1700023C21Rik | chr11:109707191-109709790 | 0.174767667 | 0           |
| Gm17252       | chr9:35492663-35494956    | 0.174767667 | 0           |
| Fbxo39        | chr11:72127945-72132921   | 0.174509333 | 0           |
| Col6a5        | chr9:105758399-105862974  | 0.174326167 | 0           |
| Aox3l1        | chr1:58335169-58436108    | 0.174318533 | 0.036899333 |
| 2310034O05Rik | chr5:100639710-100647068  | 0.17427     | 0           |
| 4930552P12Rik | chr19:55715078-55776694   | 0.174218967 | 0.377725767 |
| Snta1         | chr2:154202049-154233820  | 0.173705    | 0.044225667 |
| Tc2n          | chr12:102886811-102956712 | 0.173594    | 1.434316667 |
| Fam150b       | chr12:31569188-31578719   | 0.173512667 | 2.1875213   |
| 1700018A04Rik | chr13:31657360-31674382   | 0.173313667 | 0.066776    |
| 4930565D16Rik | chr3:84153297-84183843    | 0.173303667 | 0           |
| Slc6a4        | chr11:76812098-76845845   | 0.172485    | 4.411593333 |
| 4930444P10Rik | chr1:16056059-16083122    | 0.172287333 | 0           |
| Mapk4         | chr18:74088140-74224603   | 0.1721641   | 1.287676333 |

|               |                           |             |             |
|---------------|---------------------------|-------------|-------------|
| Kcp           | chr6:29432035-29457952    | 0.171986    | 0.028760867 |
| Prss57        | chr10:79244218-79251730   | 0.171864667 | 0.456850667 |
| Grxcr2        | chr18:42145854-42158703   | 0.171779667 | 0           |
| Gdpd2         | chrX:97925185-97934238    | 0.1716552   | 29.665      |
| Sec31b        | chr19:44591446-44620338   | 0.171551667 | 1.076781333 |
| Tcp10c        | chr17:13547437-13570089   | 0.1714855   | 0.061700633 |
| Gm14023       | chr2:129123105-129133562  | 0.170530667 | 0.045109867 |
| Smad6         | chr9:63800882-63869866    | 0.170333033 | 0.3205094   |
| 4932425I24Rik | chr16:38297839-38341946   | 0.170215667 | 1.214789667 |
| BB287469      | chr12:89055024-89059124   | 0.170207667 | 0.175745233 |
| Hamp          | chr7:31727387-31729036    | 0.170047667 | 0           |
| 6820408C15Rik | chr2:152241322-152270064  | 0.169889333 | 2.938206667 |
| D730001G18Rik | chr15:74601337-74609289   | 0.169268    | 0.481389    |
| Foxp3         | chrX:7156801-7172369      | 0.169036333 | 0.160371867 |
| Stat4         | chr1:52065087-52164028    | 0.169004667 | 0.036417333 |
| Cst7          | chr2:150396150-150404680  | 0.168808667 | 0.036198667 |
| Gm7977        | chr3:47829933-47830681    | 0.168718333 | 0.091799333 |
| Reck          | chr4:43888401-43957678    | 0.1686127   | 0.376172333 |
| Rasd2         | chr8:77737842-77748012    | 0.168305    | 1.089702667 |
| Bcat1         | chr6:144942354-145024677  | 0.168264667 | 0.103219933 |
| Gm9573        | chr17:35754867-35763582   | 0.16807     | 2.226962333 |
| Ace           | chr11:105829258-105851278 | 0.1680611   | 13.47792767 |
| Chi3l4        | chr3:106004408-106022397  | 0.167914667 | 0           |
| Syt16         | chr12:75098747-75368903   | 0.167829367 | 0           |
| Gm6524        | chr8:11692981-11694514    | 0.167709367 | 0.106810667 |
| Gm13710       | chr2:84340904-84347030    | 0.166665    | 0           |
| Pcp2          | chr8:3623370-3625545      | 0.166648667 | 0           |
| 5730522E02Rik | chr11:25516845-26110576   | 0.166632667 | 0           |
| O3far1        | chr19:38171568-38188753   | 0.166602333 | 2.677903333 |
| Dlk2          | chr17:46434369-46440220   | 0.166533333 | 0.025750567 |
| Hsf4          | chr8:107793700-107799745  | 0.166298233 | 0           |
| Shisa6        | chr11:66025226-66339628   | 0.1661965   | 0           |
| D6Mm5e        | chr6:82896915-82980303    | 0.165987333 | 0           |
| Il15ra        | chr2:11627162-11655589    | 0.1659101   | 1.709753333 |
| Gm13845       | chr6:31316884-31348773    | 0.165868333 | 3.209884333 |
| 9930012K11Rik | chr14:70554211-70559309   | 0.165587667 | 3.072008667 |
| Ttll13        | chr7:87391261-87405707    | 0.165389667 | 0.319256    |
| Akr1c12       | chr13:4267417-4278645     | 0.165110667 | 0.137548333 |
| Hmcn1         | chr1:152409631-152840565  | 0.164994567 | 0.678458    |
| Myl6b         | chr10:127931212-127935741 | 0.164932    | 4.289083333 |
| Rln3          | chr8:86566965-86568878    | 0.164907    | 0.636516667 |
| Gnb4          | chr3:32482449-32515457    | 0.164790933 | 9.455836667 |
| Dagla         | chr19:10319754-10379367   | 0.1646909   | 1.810966667 |
| Lrfn3         | chr7:31140532-31147791    | 0.164663667 | 2.815466667 |
| Lingo3        | chr10:80295547-80306784   | 0.164657667 | 0.008702    |
| Nrgn          | chr9:37352077-37360330    | 0.164572    | 0.077803    |
| Npm3-ps1      | chr6:85026134-85027120    | 0.164521667 | 0.997797667 |
| PscA          | chr15:74545268-74547495   | 0.164405333 | 0           |
| Zfp385c       | chr11:100487532-100512007 | 0.16419017  | 0.067895234 |
| Itgal         | chr7:134439773-134478651  | 0.1641525   | 0.397856667 |
| Rcn3          | chr7:52338283-52347583    | 0.164052667 | 0           |
| Cd84          | chr1:173769827-173820849  | 0.1639812   | 0.037992333 |

|               |                           |             |             |
|---------------|---------------------------|-------------|-------------|
| 6030422M02Rik | chr1:9898718-9931035      | 0.163923067 | 0.047942667 |
| 1700020C07Rik | chr2:164652881-164654034  | 0.163719667 | 0           |
| Mamdc2        | chr19:23377098-23522812   | 0.1633823   | 0           |
| Gm10391       | chr14:26942094-26949271   | 0.1628011   | 0.451797667 |
| Chst12        | chr5:140981562-141001192  | 0.162439333 | 2.283698767 |
| Prima1        | chr12:104435117-104480356 | 0.162375667 | 0.242517333 |
| Nexn          | chr3:151899947-151929284  | 0.161935667 | 0.719981667 |
| Tigd5         | chr15:75740164-75744965   | 0.161748    | 0.1150621   |
| A430078G23Rik | chr8:3353414-3390299      | 0.161696    | 0.1455754   |
| Atp2c2        | chr8:122223908-122281618  | 0.161511267 | 1.199941333 |
| Dclk3         | chr9:111341584-111392115  | 0.161222333 | 0.628251333 |
| Adcy5         | chr16:35155721-35304635   | 0.160997333 | 0.005789767 |
| 9430060I03Rik | chr1:94830119-94847167    | 0.160996333 | 0.185519333 |
| Rrp8          | chr7:112880243-112885899  | 0.160836667 | 4.20372     |
| Gm5082        | chr13:41744811-41752146   | 0.160771667 | 0           |
| Gm5531        | chr1:155721474-155724001  | 0.160721667 | 0.004592733 |
| Cyp2b19       | chr7:27542205-27557649    | 0.1607      | 0.068515    |
| Vmn2r18       | chr5:152364235-152389499  | 0.160564333 | 0.0671123   |
| Hpx           | chr7:112740124-112748630  | 0.160564    | 0           |
| Pla2g2f       | chr4:138306447-138313513  | 0.160524267 | 16.46662333 |
| Trim9         | chr12:71345523-71448601   | 0.160491233 | 0           |
| Mylk          | chr16:34785035-35002520   | 0.160443667 | 0.078210033 |
| Angptl7       | chr4:147869388-147874571  | 0.160246433 | 0.060655333 |
| Gm10485       | chr12:3859292-3862244     | 0.159632667 | 0.181509    |
| 4930467K11Rik | chr10:57198188-57206159   | 0.159059    | 0           |
| Fkbp10        | chr11:100277007-100286154 | 0.158841333 | 0.014473467 |
| Rasgrp3       | chr17:75835244-75928393   | 0.158736233 | 1.133518    |
| Gm10394       | chr14:27081743-27088920   | 0.157896169 | 0.331348134 |
| Gm10391       | chr14:26802490-26809652   | 0.157896154 | 0.364934631 |
| Olfr111       | chr17:37666901-37667942   | 0.157631667 | 0           |
| Crisp2        | chr17:40901682-40931095   | 0.157436    | 0.139424667 |
| Cdhr5         | chr7:148454983-148462685  | 0.157154333 | 0.075820733 |
| Habp2         | chr19:56362427-56394579   | 0.156628    | 0.018124667 |
| BC096441      | chr11:69496078-69509600   | 0.156614867 | 0.519106706 |
| Tspan4        | chr7:148661134-148679326  | 0.156585333 | 1.158858333 |
| Vmn2r78       | chr7:94063858-94103687    | 0.156582    | 0           |
| 4931402G19Rik | chr2:120281433-120295103  | 0.156372333 | 8.25E-267   |
| Ppm1f         | chr16:16896561-16927468   | 0.156084667 | 4.223046733 |
| 2410003L11Rik | chr11:97459824-97484207   | 0.155611667 | 3.130242667 |
| Slc7a8        | chr14:55341051-55400723   | 0.155016667 | 0.885240667 |
| Gm15319       | chr8:19933241-19958780    | 0.154739    | 0.288206    |
| Spo11         | chr2:172805342-172819077  | 0.1542941   | 3.081783333 |
| Cdk3-ps       | chr11:116077315-116081601 | 0.154122    | 0.756935333 |
| Prss52        | chr14:64723159-64732588   | 0.15405     | 0.069101333 |
| Wdr52         | chr16:44394911-44482541   | 0.1539744   | 5.305777767 |
| Wfdc3         | chr2:164556725-164568767  | 0.153783667 | 0.046054667 |
| Gm6034        | chr17:36179905-36195590   | 0.153722667 | 0.048303333 |
| Lair1         | chr7:3958674-4014806      | 0.153407667 | 0           |
| 4930547N16Rik | chr10:87554142-87609686   | 0.153251333 | 0.318751333 |
| Bcmo1         | chr8:119619764-119657620  | 0.153124    | 0           |
| Gm19299       | chr9:66981367-67011595    | 0.153115333 | 0           |
| BB287469      | chr12:88959817-88963905   | 0.152856333 | 0.141572251 |

|               |                           |             |             |
|---------------|---------------------------|-------------|-------------|
| Gm13271       | chr4:88400771-88401320    | 0.152804667 | 0.0110343   |
| Foxd4         | chr19:24973454-24975799   | 0.152802    | 0           |
| Gm5607        | chr8:12385770-12436732    | 0.152779    | 0.138595333 |
| Cybrd1        | chr2:70956110-70980983    | 0.1525707   | 0.218311263 |
| Fam70a        | chrX:35550477-35605658    | 0.152550433 | 0           |
| Pzp           | chr6:128433584-128476738  | 0.152319333 | 0.007791833 |
| 1700034F02Rik | chr11:29447949-29478352   | 0.152169333 | 0.029279133 |
| Slc39a12      | chr2:14310024-14416604    | 0.152101667 | 0           |
| Stab2         | chr10:86303954-86470687   | 0.1519871   | 0.49766     |
| C530044C16Rik | chr6:50726113-50764893    | 0.151907667 | 0.817396667 |
| Gimap5        | chr6:48696195-48704199    | 0.1511143   | 0           |
| Gp1bb         | chr16:18620411-18622496   | 0.151033333 | 2.061319467 |
| Prdm11        | chr2:92815062-92886301    | 0.150645    | 0.110233567 |
| Gfi1b         | chr2:28464969-28477502    | 0.150503267 | 0           |
| Defb1         | chr8:22887026-22905657    | 0.150426667 | 3.83875     |
| Hcn2          | chr10:79179378-79198853   | 0.149784733 | 0.324931867 |
| Efcab8        | chr2:153606614-153620918  | 0.149692667 | 0.134246667 |
| P2rx2         | chr5:110768830-110772054  | 0.149373667 | 0.203414333 |
| Chek1         | chr9:36516066-36534243    | 0.148970667 | 0.874653667 |
| Samd4         | chr14:47502639-47725492   | 0.1488547   | 0           |
| Eme1          | chr11:94506315-94515068   | 0.1486122   | 1.116957667 |
| Otud7a        | chr7:70589657-70903913    | 0.148414    | 0.36213     |
| Osmr          | chr15:6763576-6824313     | 0.148247    | 1.750493333 |
| Lrrc63        | chr14:75484109-75530690   | 0.14751     | 0.264767    |
| Elavl4        | chr4:109876341-110024516  | 0.147249667 | 0.4743784   |
| Pacsin1       | chr17:27792626-27848051   | 0.146815    | 0.505328333 |
| Serpinb9g     | chr13:33576658-33587869   | 0.146448    | 0.367019333 |
| Fgf3          | chr7:152024516-152029253  | 0.146441667 | 0           |
| Slc35f4       | chr14:49918194-50145512   | 0.14643     | 0           |
| Mycn          | chr12:12942898-12948642   | 0.146363333 | 2.172436667 |
| Pla2g2e       | chr4:138433856-138438729  | 0.146342667 | 0           |
| Fat4          | chr3:38785861-38910905    | 0.145892233 | 0.113647333 |
| Smpdl3b       | chr4:132288880-132313086  | 0.145813    | 0.098075333 |
| Upk1a         | chr7:31388110-31397493    | 0.145135333 | 0.130394333 |
| 1700023E05Rik | chr5:77445047-77490547    | 0.144653333 | 0           |
| Angptl4       | chr17:33911844-33918520   | 0.144527    | 0           |
| Zyg11a        | chr4:107854538-107890527  | 0.144474333 | 0.067539333 |
| Synpo2        | chr3:122779436-122939067  | 0.144431433 | 0.416829633 |
| Lrat          | chr3:82696503-82707896    | 0.144395    | 0           |
| Rs1           | chrX:157205944-157237595  | 0.144337333 | 0.595068667 |
| Pet2          | chrX:86649186-86655028    | 0.143722667 | 0           |
| Bub1          | chr2:127625935-127657595  | 0.143671    | 1.479658    |
| Klhl33        | chr14:51511063-51512930   | 0.143647533 | 0           |
| Gm3833        | chr14:10716608-10719382   | 0.1435572   | 1.566666333 |
| Gm2762        | chr13:53489057-53550999   | 0.14353     | 0.371803333 |
| Gm4027        | chr12:88959858-88963093   | 0.143430231 | 0.017823669 |
| lfnk          | chr4:35099303-35101268    | 0.143180667 | 0.046054667 |
| Vipr2         | chr12:117316195-117384734 | 0.1430853   | 0.0211886   |
| Olfir987      | chr2:85171123-85172053    | 0.143009067 | 0           |
| Dab2          | chr15:6249788-6390709     | 0.142730667 | 0           |
| Tdrd9         | chr12:113209769-113307065 | 0.142716667 | 0           |
| Al646023      | chr10:75012869-75023075   | 0.142359667 | 0.103585533 |

|               |                              |             |             |
|---------------|------------------------------|-------------|-------------|
| Apold1        | chr6:134932018-134936854     | 0.142350333 | 0.120366667 |
| Psg25         | chr7:19105050-19117576       | 0.142223333 | 0           |
| 1700066B19Rik | chr18:35886642-35890523      | 0.142209667 | 3.525466667 |
| A330009N23Rik | chr15:101051621-101055617    | 0.142154333 | 1.728063333 |
| C130074G19Rik | chr1:186695804-186706915     | 0.141914    | 1.532417333 |
| Gm16702       | chr17:8571909-8582333        | 0.141687167 | 0.410729333 |
| Gna15         | chr10:80965058-80986970      | 0.1413805   | 1.635439    |
| BC021891      | chr8:128434349-128471339     | 0.140994967 | 0.0409226   |
| Gm5860        | chr4:81711283-81748711       | 0.140972667 | 0           |
| Il17c         | chr8:124945984-124947539     | 0.140881    | 0.075806333 |
| Casq2         | chr3:101890432-101950435     | 0.140821967 | 0.1873      |
| Ogg1          | chr6:113276969-113284180     | 0.140706667 | 0.551742    |
| Trpc5         | chrX:140816213-141122723     | 0.140593067 | 0           |
| 4930412F15Rik | chr4:43672493-43681731       | 0.140554    | 0.036168    |
| Gm10857       | chr2:6053914-6061616         | 0.140286567 | 0           |
| Olfr993       | chr2:85254089-85255034       | 0.140089433 | 0           |
| Slc25a31      | chr3:40512792-40530016       | 0.139746067 | 0.089614    |
| Xrra1         | chr7:107007727-107066334     | 0.139498    | 0.1451753   |
| 5830416P10Rik | chr19:53515701-53539286      | 0.139439667 | 0.392306667 |
| Shc3          | chr13:51526410-51662453      | 0.139418667 | 0.101483333 |
| Pkdcc         | chr17:83614622-83624409      | 0.139292667 | 0.700813333 |
| lfnz          | chr4:88428034-88429496       | 0.139186257 | 0.106614077 |
| Pglyrp3       | chr3:91818504-91835506       | 0.139105667 | 3.222693333 |
| Gstm6         | chr3:107741765-107746667     | 0.139051    | 0.029817567 |
| Bche          | chr3:73439730-73512337       | 0.1389333   | 0.238315    |
| 4933413G19Rik | chr6:128325527-128335162     | 0.138734    | 0           |
| Steap4        | chr5:7960471-7982213         | 0.138679333 | 5.3192      |
| Gsdmc3        | chr15:63689279-63710113      | 0.138082233 | 0.035032833 |
| Abcc12        | chr8:89028739-89090489       | 0.138072    | 0           |
| Adssl1        | chr12:113858257-113879566    | 0.138064333 | 0.91495     |
| Gm9895        | chr19:29141790-29143993      | 0.137775667 | 0           |
| Hsd3b6        | chr3:98609426-98618366       | 0.137446    | 0           |
| lldr2         | chr1:168184269-168246963     | 0.1373602   | 0.170890667 |
| Aicda         | chr6:122503826-122514198     | 0.137338667 | 0           |
| 1100001G20Rik | chr11:83560441-83566148      | 0.137268333 | 0           |
| Uhrf1         | chr17:56442759-56462909      | 0.136874    | 1.239903333 |
| Acer1         | chr17:57092912-57121549      | 0.1366533   | 2.254577    |
| Snai1         | chr2:167363726-167368311     | 0.136308667 | 0           |
| Mcm5          | chr8:77633426-77652338       | 0.136233667 | 0.692041333 |
| Aoc3          | chr11:101191919-101200744    | 0.136160033 | 0.827716    |
| Adamdec1      | chr14:69181443-69200129      | 0.13616     | 1.37735     |
|               | 3-Mar chr1:72473685-72583138 | 0.135997333 | 1.40187     |
| Gm15698       | chr11:88825980-88828231      | 0.135983    | 0           |
| Serpina3g     | chr12:105452753-105480144    | 0.1359464   | 0           |
| Sh3bp2        | chr5:34868432-34906288       | 0.135701    | 2.199206667 |
| Arhgap19      | chr19:41841077-41876574      | 0.135663333 | 0.194113333 |
| Zfp286        | chr11:62591888-62602919      | 0.135626667 | 3.260613733 |
| E130012A19Rik | chr11:97488700-97491030      | 0.135580467 | 5.379796667 |
| Gm13290       | chr4:88451929-88452897       | 0.135404    | 0.023839233 |
| 1700007I08Rik | chr2:154377511-154379012     | 0.135268667 | 0.021754867 |
| Vmn2r30       | chr7:7264984-7290204         | 0.1351771   | 0.010759533 |
| Dusp23        | chr1:174560899-174563105     | 0.135157667 | 5.100686667 |

|               |                           |             |             |
|---------------|---------------------------|-------------|-------------|
| Paqr6         | chr3:88168510-88172463    | 0.134986467 | 0.368876    |
| 4832428D23Rik | chr1:44260914-44275776    | 0.134650567 | 0           |
| Btbd17        | chr11:114651982-114657206 | 0.134601667 | 0.067281367 |
| Rrh           | chr3:129511492-129525423  | 0.134597133 | 2.202994    |
| Gm14405       | chr2:176637496-176649142  | 0.134593467 | 0.088003267 |
| Prrt3         | chr6:113444088-113451812  | 0.134522567 | 1.002973333 |
| Rbfox1        | chr16:5884885-7412573     | 0.134433567 | 0.861010667 |
| Gng7          | chr10:80411368-80477670   | 0.134305733 | 1.231382333 |
| H2afy3        | chr15:62049095-62051006   | 0.134130667 | 0.322857367 |
| 1700028J19Rik | chr7:51485299-51491492    | 0.134068    | 8.0077157   |
| Gria3         | chrX:38754480-39031778    | 0.133945    | 0.390773    |
| Thy1          | chr9:43851466-43856662    | 0.13371     | 0.110496333 |
| Ms4a6c        | chr19:11543857-11556686   | 0.133667    | 0           |
| Lrrc66        | chr5:73997880-74023660    | 0.133464467 | 0           |
| Insrr         | chr3:87600872-87620023    | 0.133362333 | 2.13191     |
| Ddc           | chr11:11714103-11798147   | 0.133348    | 0           |
| Mmp24         | chr2:155601079-155644102  | 0.133307767 | 0.732060333 |
| Rcsd1         | chr1:167579075-167638225  | 0.133023333 | 0           |
| Vmn2r89       | chr14:52071636-52080968   | 0.132942333 | 0           |
| 4921506M07Rik | chr12:58665101-58723096   | 0.132940333 | 0.34464     |
| Skor1         | chr9:62985970-62996768    | 0.1328397   | 0           |
| Vtn           | chr11:78312621-78315827   | 0.132838667 | 0           |
| Unc5c         | chr3:141128527-141497886  | 0.132669667 | 0           |
| Cd83          | chr13:43880475-43898501   | 0.132391    | 0.104464233 |
| Spink10       | chr18:62708564-62821042   | 0.132282667 | 0.43648     |
| Gldc          | chr19:30172936-30249908   | 0.1321153   | 1.127719067 |
| Ovol2         | chr2:144130911-144157816  | 0.132111    | 0.688615333 |
| Gm9839        | chr1:32576407-32577844    | 0.132028667 | 0.0274184   |
| 4932438H23Rik | chr16:91054179-91069390   | 0.131899    | 2.677223333 |
| Itgb2         | chr10:76993092-77028419   | 0.131882667 | 0.201190333 |
| Bai3          | chr1:25124320-25886552    | 0.131474667 | 0           |
| Odf3          | chr7:148033814-148036824  | 0.131373667 | 2.12072     |
| Sorcs3        | chr19:48280514-48879995   | 0.1313426   | 0.5653179   |
| Cd86          | chr16:36603954-36666163   | 0.131202667 | 0.277327    |
| Nat8l         | chr5:34338632-34348565    | 0.130789767 | 0.031937233 |
| Gm11166       | chr17:13289525-13291338   | 0.130762367 | 0.539946667 |
| Dpp6          | chr5:27143896-28054040    | 0.130651    | 2.238637    |
| Grm7          | chr6:110595591-111517224  | 0.1304603   | 2.965046667 |
| Bambi-ps1     | chr2:122292318-122293533  | 0.130331333 | 0           |
| Gm20139       | chr10:18861554-18927753   | 0.1303023   | 0           |
| Efhc1         | chr1:20941706-20980922    | 0.129922133 | 6.622586667 |
| Spdef         | chr17:27851391-27865896   | 0.1297849   | 2.644474333 |
| Hoxb5         | chr11:96164825-96167435   | 0.129781333 | 0           |
| Gm17751       | chr1:76485707-76498603    | 0.12978     | 0           |
| A130077B15Rik | chr10:122002078-122006947 | 0.1296133   | 0.0223562   |
| Cd8b1         | chr6:71272805-71287445    | 0.129606667 | 0           |
| Fam55c        | chr16:55840065-55895398   | 0.129381167 | 0.836542    |
| Mef2c         | chr13:83643032-83806684   | 0.129375767 | 0           |
| 4933405D12Rik | chr3:122585509-122627034  | 0.129153    | 0.136625667 |
| Wdr16         | chr11:67738307-67779144   | 0.129026333 | 0.312972667 |
| Uggt2         | chr14:119384206-119498656 | 0.1288771   | 1.149380333 |
| Foxr1         | chr9:44242316-44248951    | 0.128817333 | 0           |

|               |                           |             |             |
|---------------|---------------------------|-------------|-------------|
| Lmod1         | chr1:137221389-137264642  | 0.128659667 | 0.018025933 |
| Agmat         | chr4:141302589-141315178  | 0.128653933 | 0           |
| Miat          | chr5:112642247-112657968  | 0.128457333 | 13.68416667 |
| Dmrtc1b       | chrX:99903219-99910548    | 0.128390667 | 0           |
| Prss45        | chr9:110737091-110743814  | 0.128162667 | 0           |
| 9530008L14Rik | chr13:41858516-41942985   | 0.128152333 | 0.202388333 |
| Ryr3          | chr2:112471538-112870488  | 0.127865333 | 0.096528433 |
| Rnf151        | chr17:24852784-24855002   | 0.127865333 | 0           |
| Gm14405       | chr2:175393150-175404796  | 0.1277967   | 0.087358233 |
| Erc2          | chr14:28435627-29291723   | 0.127508333 | 0.190136667 |
| Sec14l4       | chr11:3931784-3948012     | 0.127035    | 0.499152333 |
| Srd5a2        | chr17:74367045-74397256   | 0.126687333 | 0           |
| Sh2d2a        | chr3:87650676-87659644    | 0.126489333 | 0.0062058   |
| Ntrk3         | chr7:85336999-85722724    | 0.126466333 | 10.43094493 |
| Gulp1         | chr1:44608515-44853681    | 0.126446667 | 0.304355    |
| Fermt3        | chr19:7073447-7093959     | 0.126386033 | 7.021111667 |
| Arl14         | chr3:69026340-69027540    | 0.126315    | 0           |
| Orm1          | chr4:63005599-63009196    | 0.126092333 | 0.402793333 |
| Gm6592        | chrX:8421119-8426733      | 0.125979667 | 0           |
| Capn13        | chr17:73655803-73748636   | 0.125913367 | 1.654563333 |
| Trim72        | chr7:135147891-135154907  | 0.1257167   | 1.43633     |
| Nps           | chr7:142460301-142464625  | 0.125517333 | 0.043219333 |
| Bhlha9        | chr11:76485971-76487178   | 0.125428    | 0           |
| Gpr37         | chr6:25618522-25639980    | 0.125233333 | 0.403173333 |
| Armc4         | chr18:7088230-7297899     | 0.124814333 | 0.653253333 |
| Dlgap3        | chr4:126846514-126914266  | 0.124750033 | 0.137013133 |
| Gm13279       | chr4:88437293-88438261    | 0.124612372 | 6.14E-07    |
| Cct6b         | chr11:82532749-82577790   | 0.124525467 | 0           |
| Kcnh1         | chr1:194014753-194334040  | 0.1244856   | 2.316916667 |
| Dnm3os        | chr1:164147753-164155681  | 0.12442     | 0.80644     |
| Rbfox3        | chr11:118351073-118770886 | 0.124166333 | 0.006700033 |
| Mmp13         | chr9:7272513-7283333      | 0.123963    | 0           |
| Tspan7        | chrX:10062241-10173730    | 0.123712333 | 5.369906667 |
| Obscn         | chr11:58807758-58949877   | 0.123603333 | 0           |
| Olfr1014      | chr2:85616742-85617660    | 0.123353    | 0           |
| Pkn3          | chr2:29934285-29946539    | 0.123315667 | 0.582610367 |
| Klf1          | chr8:87425826-87429194    | 0.123211    | 0           |
| Camk2a        | chr18:61085285-61147806   | 0.123193    | 1.389535    |
| Tlr5          | chr1:184884918-184906175  | 0.122782    | 0.236326667 |
| Rltpr         | chr8:108214805-108222065  | 0.122630667 | 0.664413133 |
| Fbn1          | chr2:125126329-125332174  | 0.1226213   | 0.034773333 |
| Gm6320        | chr13:113784075-113790602 | 0.122414133 | 1.087156667 |
| A730017C20Rik | chr18:59222034-59236614   | 0.122105    | 3.772252067 |
| Fam83d        | chr2:158593834-158612373  | 0.121981333 | 1.797275833 |
| Mutyh         | chr4:116480338-116492036  | 0.121860333 | 2.100269    |
| Sycp3         | chr10:87922331-87935981   | 0.121800333 | 0.50131     |
| 1700085C21Rik | chr12:84033506-84040142   | 0.121779667 | 0.077169667 |
| Abcb4         | chr5:8893720-8959226      | 0.121674867 | 0.014530833 |
| Gdap111       | chr2:163264202-163281060  | 0.121655633 | 0           |
| Myadml2       | chr11:120507344-120509651 | 0.121540333 | 0           |
| Tigd4         | chr3:84397495-84400954    | 0.121302867 | 0.33708     |
| Fggy          | chr4:95224197-95593630    | 0.121299    | 1.926933067 |



|               |                           |             |             |
|---------------|---------------------------|-------------|-------------|
| Gm9920        | chr15:54931471-54945137   | 0.121193667 | 0.046707333 |
| Rbp4          | chr19:38191109-38199811   | 0.121055333 | 0           |
| Pxdn          | chr12:30622900-30702523   | 0.120975    | 0.9864461   |
| C86187        | chr7:54223116-54231281    | 0.120888667 | 0.124126    |
| Pik3cg        | chr12:32858261-32893514   | 0.120648533 | 0.3764696   |
| Sstr3         | chr15:78367444-78374775   | 0.120640333 | 0.647992667 |
| Lmod3         | chr6:97188521-97202774    | 0.120411333 | 0           |
| Trim71        | chr9:114420390-114473487  | 0.1203875   | 0.196493667 |
| Casp12        | chr9:5345475-5373034      | 0.120385333 | 0.023450767 |
| Pcsk9         | chr4:106114938-106136930  | 0.1203361   | 0.4586436   |
| Akap2         | chr4:57858119-57909856    | 0.120243333 | 4.698313333 |
| Foxp2         | chr6:14851348-15391977    | 0.120126667 | 2.760469333 |
| Nrip3         | chr7:116901569-116925059  | 0.1200613   | 0.100083233 |
| Rad51         | chr2:118938552-118961806  | 0.120012667 | 1.333363333 |
| Mmp17         | chr5:130090088-130114086  | 0.119811333 | 0           |
| Pbp2          | chr6:135259146-135260402  | 0.119550333 | 0           |
| Fzd2          | chr11:102465744-102469372 | 0.1193      | 1.403924    |
| Gldn          | chr9:54134292-54189584    | 0.119090433 | 0.094888    |
| B230209K01Rik | chr1:122983981-123017552  | 0.119073    | 0           |
| Slc3a1        | chr17:85427686-85463581   | 0.118699338 | 0.447463333 |
| Spint3        | chr2:164395194-164398956  | 0.118637333 | 0.408503333 |
| 1700086L19Rik | chr12:75385262-75396937   | 0.118331333 | 0.184521667 |
| Dpcr1         | chr17:35772699-35780640   | 0.117311333 | 0           |
| Pgpep1l       | chr7:75381493-75409119    | 0.117224    | 0           |
| Rasal3        | chr17:32527605-32540526   | 0.117197667 | 0           |
| Npr1          | chr3:90254513-90269788    | 0.117051    | 0.007284267 |
| Cyp4f18       | chr8:74512380-74533525    | 0.117041333 | 0           |
| Unc119        | chr11:78157023-78162658   | 0.116759    | 4.741466667 |
| Mocs3         | chr2:168056121-168057803  | 0.116679033 | 0.028919033 |
| C330046G13Rik | chr10:84010161-84016083   | 0.116529    | 1.580842    |
| Nckap1l       | chr15:103284255-103329231 | 0.116219333 | 0.043613    |
| Clec4a1       | chr6:122871865-122884637  | 0.115950667 | 2.84219     |
| Dmrtc2        | chr7:25655075-25662670    | 0.115776333 | 0           |
| Hormad2       | chr11:4246385-4341085     | 0.115603    | 0           |
| C4a           | chr17:34946036-34960399   | 0.115533333 | 0.023962667 |
| 4930507D05Rik | chr10:61911907-61914101   | 0.115478    | 4.65E-15    |
| Kcnc3         | chr7:51846255-51860121    | 0.1153896   | 2.639806667 |
| Astn2         | chr4:65041836-66065517    | 0.115314133 | 1.317472    |
| Olfr1013      | chr2:85609959-85610877    | 0.115230333 | 0           |
| BC051665      | chr13:60883247-60887725   | 0.115095    | 0           |
| D17Ertd648e   | chr17:12055935-12076055   | 0.114958    | 0.319157333 |
| Prokr2        | chr2:132196064-132211183  | 0.114433667 | 0.205940667 |
| Vmn2r121      | chrX:121240947-121249519  | 0.114383    | 0           |
| 4930444G20Rik | chr10:21786114-21787885   | 0.114138267 | 0.048489    |
| Kank4         | chr4:98421582-98484228    | 0.114093    | 0.036698333 |
| Pip5kl1       | chr2:32431338-32439299    | 0.114084    | 1.640313333 |
| Gm4832        | chr17:88524851-88530456   | 0.113780333 | 0.554784    |
| Tert          | chr13:73764448-73786489   | 0.1137226   | 0.676581333 |
| Lrrc55        | chr2:85028227-85036856    | 0.113593    | 0           |
| Faim2         | chr15:99327435-99358448   | 0.113315967 | 0           |
| Htr2a         | chr14:75040646-75106666   | 0.113207    | 0           |
| Ucp1          | chr8:85814246-85822355    | 0.113131367 | 0           |

|               |       |                           |             |             |
|---------------|-------|---------------------------|-------------|-------------|
|               | 2-Mar | chr18:56921369-57085202   | 0.113098667 | 0.399127    |
| Sfmbt2        |       | chr2:10292077-10516880    | 0.112962    | 0.027662167 |
| Slc8a3        |       | chr12:82298901-82434167   | 0.112778333 | 1.464003333 |
| Coro1a        |       | chr7:133843287-133848268  | 0.112689333 | 2.855076667 |
| Zfp389        |       | chr13:21596184-21598393   | 0.112682667 | 1.02247     |
| 2310010M20Rik |       | chr16:32271694-32274865   | 0.112514533 | 0.0063659   |
| Prss16        |       | chr13:22094044-22101610   | 0.112395    | 0.014460967 |
| 1700123K08Rik |       | chr5:139003067-139005922  | 0.112060333 | 0.067119    |
| Olfr1382      |       | chr11:49348688-49349624   | 0.1118493   | 0           |
| Slc1a7        |       | chr4:107640938-107686137  | 0.111829667 | 0           |
| C2cd4b        |       | chr9:67607243-67608740    | 0.111649333 | 1.504332    |
| Pcdha9        |       | chr18:37157533-37347311   | 0.111617    | 0.310925338 |
| Hmgcs2        |       | chr3:98084353-98114661    | 0.111484    | 0           |
| Aspg          |       | chr12:113344893-113365784 | 0.111330967 | 0.5335135   |
| Phex          |       | chrX:153596617-153853218  | 0.111246833 | 0           |
| Ets1          |       | chr9:32503626-32565405    | 0.111156    | 0.744786667 |
| 1700061G19Rik |       | chr17:57015055-57028261   | 0.1111464   | 0.881927333 |
| Zap70         |       | chr1:36818705-36839661    | 0.111068667 | 0           |
| Slc2a6        |       | chr2:26876884-26883518    | 0.110877    | 0.574253333 |
| Fam26e        |       | chr10:33811157-33816325   | 0.110802    | 3.297523333 |
| Slc36a2       |       | chr11:54971969-54998579   | 0.110759867 | 0.129563333 |
| Cyp2t4        |       | chr7:27938732-27943583    | 0.110666    | 0.965030333 |
| Nsun7         |       | chr5:66651363-66689255    | 0.110607833 | 1.1798548   |
| Cysltr1       |       | chrX:103771855-103798801  | 0.110578    | 0           |
| Smcp          |       | chr3:92387787-92392946    | 0.110361667 | 2.977923333 |
| A230050P20Rik |       | chr9:20673085-20678751    | 0.110301008 | 0.1635633   |
| Zfp473        |       | chr7:51986855-52003987    | 0.110277767 | 0.913219333 |
| Pbx4          |       | chr8:72356602-72396191    | 0.110139    | 0.735112667 |
| 4933406C10Rik |       | chr12:33604248-33638654   | 0.109838    | 0.71051     |
| P2ry4         |       | chrX:97785492-97790208    | 0.109460767 | 1.231553333 |
| 2310005G13Rik |       | chr16:57037079-57071459   | 0.109402667 | 2.131420333 |
| Gm7444        |       | chr9:55875442-55879380    | 0.1090403   | 0.0259706   |
| Greb1         |       | chr12:16677420-16807692   | 0.108829667 | 1.349512667 |
| Prr7          |       | chr13:55565627-55574516   | 0.108736    | 0.887679    |
| Msh4          |       | chr3:153520110-153569102  | 0.108575767 | 0.140289    |
| 4930511E03Rik |       | chr6:94893827-94901539    | 0.108212    | 0           |
| Map4k1        |       | chr7:29767872-29788297    | 0.10787     | 0.293463    |
| Batf2         |       | chr19:6164457-6172475     | 0.107705333 | 3.080096667 |
| Ntn3          |       | chr17:24340790-24346332   | 0.107670333 | 0.330160667 |
| Gm5483        |       | chr16:36184297-36188196   | 0.107661333 | 0.165923333 |
| Gm4984        |       | chrX:12229008-12229946    | 0.1074967   | 0.1295266   |
| Pknox2        |       | chr9:36698566-36954899    | 0.107177867 | 1.06339     |
| Lrrc34        |       | chr3:30523188-30546740    | 0.107130333 | 3.170226667 |
| Isoc2a        |       | chr7:4828654-4847318      | 0.106947333 | 5.255966667 |
| Naip2         |       | chr13:100914017-100972047 | 0.106780667 | 0.029621167 |
| 6430571L13Rik |       | chr9:107242970-107252014  | 0.106770667 | 0.549072    |
| Gli1          |       | chr10:126766937-126778635 | 0.106624733 | 0.238774567 |
| Chst14        |       | chr2:118752232-118754319  | 0.106523933 | 5.304844667 |
| 4930568K20Rik |       | chr5:124679733-124687146  | 0.106416    | 1.209659667 |
| Tex14         |       | chr11:87218566-87369325   | 0.106263167 | 0.149391967 |
| Gm8979        |       | chr7:113219244-113222662  | 0.105895333 | 0           |
| Arhgef25      |       | chr10:126619576-126627110 | 0.1057617   | 0.192241867 |

|               |                           |             |             |
|---------------|---------------------------|-------------|-------------|
| 9130019P16Rik | chr6:54219674-54380215    | 0.105585167 | 2.439644667 |
| Msx3          | chr7:147232055-147234987  | 0.105346    | 1.138137333 |
| Mgam          | chr6:40578829-40719122    | 0.104776    | 0.064291667 |
| 4933408J17Rik | chr10:93052157-93067990   | 0.104767333 | 0.338292333 |
| Trip13        | chr13:74049909-74075215   | 0.104712967 | 2.149613333 |
| BC051628      | chr2:180954720-180957556  | 0.104485333 | 0.05746     |
| Gm13290       | chr4:88422665-88423633    | 0.104430372 | 0.012852628 |
| 4930403N07Rik | chr12:73202278-73286016   | 0.104361    | 0           |
| Gas2l2        | chr11:83235403-83242957   | 0.10419     | 0           |
| Lyg2          | chr1:37962767-37973338    | 0.103938333 | 0           |
| 2310039L15Rik | chr10:94798909-94825850   | 0.1038828   | 0           |
| Zfp534        | chr4:147047611-147076662  | 0.103783    | 0           |
| 4931409K22Rik | chr5:24049251-24061287    | 0.103603    | 0           |
| Frmpd4        | chrX:163909240-165015165  | 0.103595333 | 0.071530233 |
| Zfp647        | chr15:76740799-76755878   | 0.103587733 | 0.274230333 |
| Hnf1b         | chr11:83664370-83719317   | 0.103483    | 1.079553333 |
| 4930578M01Rik | chr15:98816395-98819712   | 0.103384667 | 0           |
| Adamts7       | chr9:90057815-90094940    | 0.103348333 | 0.357245    |
| Spp1          | chr5:104864129-104870072  | 0.103341333 | 0           |
| 1700047L14Rik | chr5:109192860-109197936  | 0.102914667 | 0           |
| Arhgap20      | chr9:51573456-51661164    | 0.1023641   | 0.0659234   |
| 4933424G06Rik | chr1:36771382-36814805    | 0.102280667 | 0           |
| Rasl2-9-ps    | chr7:5076543-5077552      | 0.102101    | 2.238076667 |
| Cmtm1         | chr8:106817441-106834045  | 0.102045867 | 0.177693667 |
| Cxcl3         | chr5:91215128-91217116    | 0.101592333 | 0.258708667 |
| Vmn2r47       | chr7:10092186-10116991    | 0.101581443 | 0.004784033 |
| Wnt9b         | chr11:103588676-103611135 | 0.101548333 | 0.165426333 |
| Ankrd9        | chr12:112213562-112217231 | 0.101295667 | 0.719113333 |
| Aifm3         | chr16:17489783-17507575   | 0.1011623   | 0.229523667 |
| Pcsk6         | chr7:73007021-73195272    | 0.101152067 | 1.852668    |
| Adamts12      | chr15:10994544-11276622   | 0.1011428   | 0           |
| Shroom1       | chr11:53270706-53281257   | 0.101119333 | 2.445553333 |
| Exoc3l        | chr8:107813823-107819998  | 0.1010915   | 0.26758     |
| Gm12185       | chr11:48718157-48740661   | 0.100940967 | 0           |
| Trim36        | chr18:46324953-46372261   | 0.100654467 | 0.0152027   |
| Nos2          | chr11:78734360-78773626   | 0.100650967 | 0.081717    |
| Ppp1r16b      | chr2:158492468-158592070  | 0.100509033 | 0.0710607   |
| Grap2         | chr15:80453912-80480728   | 0.100394467 | 0           |
| Ccdc38        | chr10:93003376-93047071   | 0.100314867 | 0.148497067 |
| C1ra          | chr6:124462638-124473458  | 0.100307333 | 0.048369767 |
| Ccne1         | chr7:38883002-38892509    | 0.100011667 | 0.526912667 |
| Cacna1h       | chr17:25511231-25570728   | 0.099835433 | 3.609693333 |
| Mybphl        | chr3:108167828-108182975  | 0.099610333 | 0           |
| Ebf4          | chr2:130121674-130196217  | 0.099459    | 0.563157667 |
| Dsn1          | chr2:156820797-156832811  | 0.099311467 | 0.430956    |
| Ghdc          | chr11:100627645-100632271 | 0.099118233 | 0.491688333 |
| Myh13         | chr11:67140604-67185004   | 0.098949067 | 0.036204667 |
| Akap14        | chrX:34690692-34708837    | 0.098911333 | 0.177523667 |
| Slc6a20a      | chr9:123546024-123587950  | 0.098884333 | 0.018326533 |
| Sfrp1         | chr8:24521973-24560104    | 0.0986193   | 4.628985333 |
| Asb4          | chr6:5333385-5383021      | 0.0986085   | 0           |
| 4930413F20Rik | chr15:34604827-34608959   | 0.098562    | 0.653941333 |

|               |                          |             |             |
|---------------|--------------------------|-------------|-------------|
| Rin1          | chr7:29573987-29583984   | 0.098553467 | 0.138946    |
| Adcy2         | chr13:68758919-69138419  | 0.098189    | 0.633602333 |
| Gm13279       | chr4:88443140-88444108   | 0.098178667 | 0.179307    |
| Ptcra         | chr17:46892611-46900661  | 0.097927    | 0.055353367 |
| Vwc2          | chr11:11014018-11163529  | 0.097710233 | 2.818313333 |
| 1700065D16Rik | chr9:95755968-95758739   | 0.097639    | 1.838156667 |
| Gm13547       | chr2:29617047-29619609   | 0.097385333 | 0.067065    |
| Nhlrc4        | chr17:26079177-26081876  | 0.097124667 | 0.91623     |
| Insl6         | chr19:29395843-29399808  | 0.097063    | 1.436156667 |
| Gm13051       | chr4:146064712-146094024 | 0.096752833 | 0           |
| Vmn2r47       | chr7:10402130-10426674   | 0.096707973 | 0.010759533 |
| Lhfp12        | chr13:94827750-94965364  | 0.096629333 | 1.028513    |
| Nipal1        | chr5:73039034-73062317   | 0.096266467 | 0.439183633 |
| E230008N13Rik | chr4:45903174-45963646   | 0.096247667 | 2.265566667 |
| Fam65c        | chr2:167806285-167836093 | 0.096114667 | 0.049376    |
| Plek          | chr11:16871208-16908721  | 0.095998    | 0.179682667 |
| Egr4          | chr6:85461115-85463536   | 0.095811333 | 0           |
| Grp           | chr18:66033147-66046233  | 0.095768    | 0           |
| Slco2b1       | chr7:106806313-106859850 | 0.095681667 | 0           |
| E230016K23Rik | chr11:83395562-83437195  | 0.095378    | 4.181566667 |
| 1600002D24Rik | chr16:96052729-96150684  | 0.095069667 | 0           |
| Ssxb3         | chrX:8160669-8166372     | 0.094938667 | 0           |
| H2-M2         | chr17:37617795-37620474  | 0.094872333 | 0           |
| 1700018C11Rik | chr4:63268124-63283463   | 0.094745333 | 0           |
| Ctcf1         | chr2:172919109-172945026 | 0.0946596   | 0.054409433 |
| Zdbf2         | chr1:63319842-63361149   | 0.0944782   | 0.020575567 |
| Zdhhc15       | chrX:101732308-101866403 | 0.094389333 | 1.159293    |
| Sprr2j-ps     | chr3:92222008-92223318   | 0.094336    | 0           |
| Acot11        | chr4:106417165-106472436 | 0.0943337   | 1.704915    |
| Hsf2bp        | chr17:32081713-32171453  | 0.094247667 | 0.602433333 |
| Pou2f2        | chr7:25876133-25917479   | 0.094064333 | 0.044287    |
| Pax5          | chr4:44544377-44723312   | 0.093976667 | 0           |
| Slc38a4       | chr15:96825253-96886387  | 0.093822    | 0.034306667 |
| Slc16a12      | chr19:34742895-34821601  | 0.093791333 | 0.061379333 |
| Bmpr1b        | chr3:141500099-141645215 | 0.093669    | 0.010956    |
| Ushbp1        | chr8:73908172-73919700   | 0.093608333 | 0.050460333 |
| Vmn2r47       | chr7:8246254-8270798     | 0.09346064  | 0.004782    |
| Zmynd10       | chr9:107449640-107453650 | 0.093377667 | 5.570603333 |
| Cmtm2a        | chr8:106804941-106817081 | 0.093336333 | 0           |
| Elavl3        | chr9:21819448-21856467   | 0.093114333 | 0.321158067 |
| Shank1        | chr7:51565633-51613723   | 0.0929492   | 0.134137667 |
| Nell2         | chr15:95049880-95359137  | 0.092861867 | 0           |
| Col12a1       | chr9:79446797-79566485   | 0.092813667 | 0.082337    |
| Nlrc5         | chr8:96996662-97051172   | 0.092811333 | 0.2392965   |
| Vmn2r26       | chr6:123974775-124012053 | 0.092790333 | 0           |
| Selplg        | chr5:114267806-114280510 | 0.092671233 | 0.017779967 |
| Gli2          | chr1:120730637-120950196 | 0.092659833 | 1.085264667 |
| Diap3         | chr14:87056129-87540921  | 0.092425333 | 0.047511433 |
| Tm4sf1        | chr3:57090985-57105841   | 0.092372    | 4.67413     |
| Agxt2l1       | chr3:130320365-130338668 | 0.092119333 | 0           |
| Gucy1a2       | chr9:3532348-3905787     | 0.092089167 | 0.369817667 |
| Corin         | chr5:72691263-72895779   | 0.091827    | 0.153544967 |

|               |                           |             |             |
|---------------|---------------------------|-------------|-------------|
| 6430531B16Rik | chr7:147158201-147164654  | 0.091823    | 0           |
| Ddo           | chr10:40349816-40369737   | 0.0918149   | 1.438881667 |
| Tagln3        | chr16:45711342-45724644   | 0.091630333 | 0.035304333 |
| Als2cr12      | chr1:58714963-58752833    | 0.091537667 | 0.719160667 |
| Gpr81         | chr5:124326744-124330029  | 0.091481    | 0           |
| Cd28          | chr1:60803231-60830203    | 0.091322667 | 0.061535333 |
| Speer4e       | chr5:14933630-14938475    | 0.091144667 | 0.78318     |
| Gm6904        | chr14:59863277-59879053   | 0.090893667 | 0.122493    |
| Adra2a        | chr19:54119671-54123472   | 0.090841667 | 0.48708     |
| 0610005C13Rik | chr7:52823164-52830546    | 0.090672333 | 0           |
| Gpr183        | chr14:122351552-122364415 | 0.090541333 | 0.176551667 |
| Adam19        | chr11:45869488-45960844   | 0.090524433 | 0.383603333 |
| Hspb2         | chr9:50559176-50560459    | 0.089890333 | 0           |
| Fgf23         | chr6:127022919-127031426  | 0.089825667 | 0           |
| 1700024P16Rik | chr4:104586060-104689468  | 0.089694267 | 0.230334333 |
| Peg3as        | chr7:6659470-6660335      | 0.089505    | 3.023476838 |
| Gucy2g        | chr19:55272587-55315726   | 0.089449867 | 0.77514     |
| 5031414D18Rik | chr14:75415833-75452339   | 0.089415667 | 0           |
| Traip         | chr9:107853293-107874599  | 0.089205533 | 0           |
| Cela2a        | chr4:141370877-141381918  | 0.089080333 | 3.301193333 |
| Rfx8          | chr1:39722145-39777834    | 0.0890214   | 0           |
| Boc           | chr16:44485157-44558983   | 0.088919333 | 1.242739333 |
| Ms4a6b        | chr19:11593048-11604893   | 0.088672667 | 0           |
| B3galnt1      | chr3:69378107-69402783    | 0.088603333 | 0.0730027   |
| Igsf11        | chr16:38902457-39027270   | 0.087852333 | 0.061389667 |
| 9430018G01Rik | chr6:43392427-43424317    | 0.087619067 | 0.534101667 |
| Mrc2          | chr11:105153959-105212459 | 0.087516    | 0           |
| Tcfl5         | chr2:180356661-180377396  | 0.087439333 | 0.033689333 |
| Lhx3          | chr2:26055731-26062076    | 0.087395333 | 0           |
| Gad1          | chr2:70400220-70440069    | 0.086696333 | 0           |
| Slc6a12       | chr6:121296714-121315791  | 0.086652    | 0.100071    |
| Kcna4         | chr2:107130745-107138661  | 0.086519    | 0           |
| Omd           | chr13:49678115-49687978   | 0.086298933 | 0.031611967 |
| Vmn2r88       | chr14:52030675-52038557   | 0.086248667 | 0           |
| Dmrta1        | chr4:89354888-89361457    | 0.085933    | 0.043536667 |
| Serpnb7       | chr1:109319265-109349266  | 0.085914667 | 0.279215667 |
| Barhl1        | chr2:28763199-28771960    | 0.085765667 | 0.047584333 |
| Tssk6         | chr8:72426113-72427417    | 0.085727667 | 0           |
| 6430562O15Rik | chr13:100180790-100182781 | 0.085667867 | 0.424838667 |
| Acsm1         | chr7:126761341-126806029  | 0.085592333 | 1.584116667 |
| Gm6642        | chr19:31004875-31005452   | 0.085232667 | 0           |
| Cnih2         | chr19:5092870-5098418     | 0.085025667 | 3.563272333 |
| Ddx4          | chr13:113388540-113442518 | 0.084920333 | 0           |
| 2610528E23Rik | chr16:57302112-57606980   | 0.084883667 | 9.120726667 |
| E330011O21Rik | chr16:78251107-78255699   | 0.084733    | 0           |
| Hsf5          | chr11:87430665-87473044   | 0.0845834   | 0.065344333 |
| Ptpn7         | chr1:137029301-137041897  | 0.084546077 | 0           |
| Aebp1         | chr11:5761868-5772228     | 0.0845051   | 0           |
| 7530420F21Rik | chr1:151923790-151946896  | 0.084377333 | 0           |
| A730090H04Rik | chr11:95006366-95020361   | 0.084202333 | 1.742583333 |
| Gm11937       | chr11:99471107-99471503   | 0.084114333 | 0.508003333 |
| 4930567H12Rik | chr8:128108537-128140570  | 0.083936667 | 0           |

|               |                           |             |             |
|---------------|---------------------------|-------------|-------------|
| Olf1002       | chr2:85487519-85488476    | 0.083711667 | 0           |
| Atp1a2        | chr1:174201839-174228195  | 0.083708    | 0.0910756   |
| Lcn14         | chr2:25592528-25595617    | 0.083666667 | 0           |
| Olf1351       | chr10:78480068-78481028   | 0.083376667 | 0           |
| Foxd1         | chr13:99124199-99126660   | 0.083315667 | 0.301882067 |
| Gm98          | chr19:10282760-10315238   | 0.083261333 | 0           |
| Hhat          | chr1:194336709-194597413  | 0.083147333 | 0.455313667 |
| Nefh          | chr11:4838758-4848067     | 0.082726    | 0.849976667 |
| AY358078      | chr14:52419720-52446034   | 0.082578    | 0.642029333 |
| Emr1          | chr17:57498108-57622952   | 0.0822122   | 0           |
| Troap         | chr15:98905403-98913840   | 0.082077667 | 0.470553333 |
| Pdxk-ps       | chr17:32213027-32228368   | 0.081901667 | 0           |
| Slfn4         | chr11:82988687-83003718   | 0.081525    | 0.025441233 |
| Vmn2r47       | chr7:9352155-9376703      | 0.081497177 | 0.004779967 |
| Grin1         | chr2:25146696-25174683    | 0.081452001 | 0.057685667 |
| 2610109H07Rik | chr4:147472545-147504807  | 0.081425333 | 1.583418333 |
| Serping1      | chr2:84605516-84615586    | 0.081346    | 0           |
| Hpd           | chr5:123621815-123632695  | 0.081339667 | 0           |
| 1700024P03Rik | chr2:109871406-109890636  | 0.08121     | 0           |
| Adam21        | chr12:82659570-82669461   | 0.080807333 | 0.953553333 |
| Kcnmb2        | chr3:31801624-32099102    | 0.080766    | 3.303436667 |
| Kremen2       | chr17:23878165-23882796   | 0.0805439   | 0.017639867 |
| 1700058G18Rik | chr10:115855176-115858291 | 0.080428691 | 0           |
| H28           | chr3:151421700-151425855  | 0.080405    | 0.185876    |
| E130310I04Rik | chr16:34943260-34959080   | 0.080372667 | 0           |
| Gm12603       | chr4:88696210-88730514    | 0.080312667 | 0           |
| Tmc5          | chr7:125740810-125818599  | 0.080181    | 2.151933333 |
| Nrsn2         | chr2:152194493-152202302  | 0.080157333 | 0           |
| Dmrt3         | chr19:25685026-25698411   | 0.080061333 | 0.012876033 |
| Bpifb9b       | chr2:154132979-154146378  | 0.080038767 | 0.033618133 |
| Olf169        | chr7:110915790-110920108  | 0.080004333 | 0           |
| Ccdc13        | chr9:121706744-121748579  | 0.0799876   | 0.369806667 |
| Prss33        | chr17:23970327-23972734   | 0.079952333 | 2.347361    |
| Kcnc2         | chr10:111708178-111903360 | 0.079939767 | 0           |
| Mmnrn2        | chr14:35188689-35217472   | 0.079734867 | 0.150647667 |
| Oprd1         | chr4:131666640-131700401  | 0.079610733 | 0.341621667 |
| Hoxb4         | chr11:96179580-96182952   | 0.079602    | 0.023839    |
| Osta          | chr16:32475663-32487965   | 0.0795938   | 0           |
| Ear5          | chr14:51781934-51782693   | 0.079549667 | 0           |
| Lingo1        | chr9:56466281-56533060    | 0.079307333 | 0           |
| Slc7a14       | chr3:31101777-31209241    | 0.079133633 | 1.120609667 |
| Cadm2         | chr16:66655665-67621153   | 0.0789304   | 0           |
| Ifi203        | chr1:175850533-175872623  | 0.0788577   | 0.052698667 |
| Slc43a1       | chr2:84679564-84703743    | 0.078405333 | 0.344576333 |
| Nlrc3         | chr16:3946932-3976632     | 0.078211833 | 0.555201533 |
| A530006G24Rik | chr2:147536428-147543368  | 0.077894    | 0.210082667 |
| Hemgn         | chr4:46406860-46417055    | 0.077674667 | 0.160894    |
| Phlda2        | chr7:150687452-150688429  | 0.077415333 | 0           |
| Olf1353       | chr10:78426053-78433357   | 0.077245    | 0           |
| Hes3          | chr4:151660080-151665771  | 0.077230333 | 0           |
| Padi4         | chr4:140301422-140330118  | 0.077177667 | 0.069339    |
| 1700034P13Rik | chr1:9737728-9761337      | 0.077009001 | 0.111245667 |

|               |                           |             |             |
|---------------|---------------------------|-------------|-------------|
| Fam184b       | chr5:45920943-46030740    | 0.076800633 | 0.170168667 |
| Ankrd45       | chr1:163072842-163100638  | 0.076597367 | 0.231810667 |
| Serpina3i     | chr12:105501331-105507575 | 0.076595667 | 1.365760333 |
| 5033411D12Rik | chr13:16949309-17786599   | 0.076468833 | 11.84578667 |
| Xkr9          | chr1:13658851-13691804    | 0.076320333 | 0           |
| Ssxb6         | chrX:8119729-8125381      | 0.076310667 | 0           |
| Ttbk1         | chr17:46579396-46624624   | 0.076118667 | 0           |
| Mapk8ip2      | chr15:89284341-89292878   | 0.076084333 | 0.033741333 |
| Pcdh20        | chr14:88864553-88871203   | 0.0757882   | 34.74476667 |
| Car14         | chr3:95701722-95708562    | 0.075785333 | 4.08E-07    |
| Gm2022        | chr12:89131277-89135166   | 0.0756443   | 0           |
| Gm6787        | chrX:7674212-7683827      | 0.075388    | 0           |
| Cacna1c       | chr6:118542313-119146427  | 0.075318333 | 0.131452533 |
| Zfp488        | chr14:34780255-34791950   | 0.075261167 | 0.026819567 |
| Il12b         | chr11:44213564-44227519   | 0.075224    | 0           |
| 4930402F06Rik | chr2:35231081-35252695    | 0.075144667 | 0           |
| Rfpl3s        | chr9:55810395-55828739    | 0.075036667 | 0           |
| Col6a6        | chr9:105591746-105730415  | 0.074917267 | 0.007500233 |
| Fam64a        | chr11:71856003-71860872   | 0.074667667 | 0.080355667 |
| Cd19          | chr7:133551961-133558384  | 0.074568667 | 0           |
| Ccdc152       | chr15:3230626-3253526     | 0.074270333 | 0           |
| Fam164b       | chr10:12869449-12897829   | 0.074175    | 0           |
| Notch4        | chr17:34701239-34725488   | 0.074164967 | 0.948271333 |
| 4930455H04Rik | chr3:116671184-116687324  | 0.074079    | 0.059492667 |
| Hipk4         | chr7:28308279-28316193    | 0.074008667 | 0           |
| Disp2         | chr2:118605454-118620911  | 0.0739593   | 5.44973     |
| Ivl           | chr3:92374823-92377637    | 0.073897667 | 0           |
| Capn9         | chr8:127100010-127142631  | 0.073720667 | 0.8251036   |
| Kcnk6         | chr7:30006946-30017541    | 0.073584333 | 0.744072    |
| Etv4          | chr11:101631055-101646624 | 0.073512667 | 3.204846333 |
| Gm3925        | chr5:143926457-143927430  | 0.073419    | 0           |
| 4932413F04Rik | chr9:103459419-103468221  | 0.073401333 | 0           |
| Kif14         | chr1:138364534-138428088  | 0.0731918   | 0.051800833 |
| 0610038B21Rik | chr8:80040954-80042477    | 0.073143102 | 0.114707667 |
| Brdt          | chr5:107760212-107816077  | 0.073129033 | 0.087226567 |
| Slamf7        | chr1:173562533-173583168  | 0.072958333 | 0.074544333 |
| A730069N07Rik | chr8:37998637-38015490    | 0.072896    | 0           |
| Klf17         | chr4:117429263-117438271  | 0.072880333 | 0.006287067 |
| Sult1a1       | chr7:133816383-133819871  | 0.072796    | 0.096849333 |
| Zmynd12       | chr4:119095288-119126504  | 0.072418333 | 0.108438333 |
| S1pr1         | chr3:115413350-115417973  | 0.072326333 | 0           |
| Drp2          | chrX:130939318-130991112  | 0.072242333 | 0           |
| Ube2t         | chr1:136859153-136870714  | 0.071955    | 2.106576633 |
| Olfr154       | chr2:85503533-85504612    | 0.071955    | 0           |
| Arhgap28      | chr17:68192047-68353448   | 0.071886333 | 0.973596667 |
| Rhebl1        | chr15:98708190-98711845   | 0.071833333 | 5.439779333 |
| Dppa3         | chr6:122576441-122580289  | 0.071826    | 0           |
| Ush2a         | chr1:190086716-190788918  | 0.071714833 | 0.005726907 |
| Kcnd1         | chrX:7400968-7413629      | 0.071611667 | 1.76058     |
| AB124611      | chr9:21330620-21349775    | 0.071547133 | 1.360174667 |
| Agphd1        | chr9:54765096-54797731    | 0.071367    | 0.639249    |
| Ccl6          | chr11:83401387-83406589   | 0.071221    | 6.9425      |

|               |                          |             |             |
|---------------|--------------------------|-------------|-------------|
| 4931417G12Rik | chr6:113546755-113550709 | 0.071053    | 0           |
| Arr3          | chrX:97800835-97813832   | 0.070991    | 0           |
| Cdh23         | chr10:59765497-60159238  | 0.070976567 | 0.07374506  |
| E030019B06Rik | chr7:146786849-146802228 | 0.0709      | 0.231308667 |
| Gm5431        | chr11:48700923-48715654  | 0.070853333 | 0           |
| Ttll2         | chr17:7555252-7557045    | 0.070820333 | 0.238083667 |
| Dppa2         | chr16:48310386-48319626  | 0.070676667 | 0           |
| Nrg2          | chr18:36177311-36356814  | 0.070552333 | 0           |
| Gfra1         | chr19:58311181-58528956  | 0.070447267 | 1.8087639   |
| Ccdc81        | chr7:97014657-97052139   | 0.070379    | 0.441436667 |
| Sncaip        | chr18:52927464-53075585  | 0.070141    | 0.033840667 |
| Sez6l         | chr5:112848170-113006218 | 0.070035967 | 0.105520333 |
| A830060N17    | chr16:21247571-21296945  | 0.069770667 | 0           |
| Ankrd53       | chr6:83712639-83718320   | 0.069531867 | 0.022030533 |
| Sbp           | chr17:24078962-24082574  | 0.069426667 | 0           |
| Dnajc5g       | chr5:31410691-31414897   | 0.069313333 | 0           |
| Gm766         | chr6:142734300-142752986 | 0.069024667 | 0.2083641   |
| Cpb2          | chr14:75642093-75683360  | 0.069024667 | 0.106378333 |
| Slc4a9        | chr18:36687805-36704262  | 0.06857     | 0.0122989   |
| Hal           | chr10:92951512-92979488  | 0.068528333 | 0           |
| 4931429L15Rik | chr9:46111443-46128069   | 0.068436333 | 0           |
| Nuf2          | chr1:171428064-171461595 | 0.068255867 | 0.510925667 |
| Faim3         | chr1:132762353-132777367 | 0.068162333 | 0           |
| Efr3b         | chr12:3962553-4038915    | 0.0680283   | 0.024785467 |
| Ccdc150       | chr1:54307526-54425571   | 0.068017667 | 0.2513616   |
| Btbd16        | chr7:137917582-137969413 | 0.067863333 | 0.010433267 |
| Frmd7         | chrX:48245821-48295887   | 0.067729967 | 0.4962743   |
| Pik3cd        | chr4:149023276-149075738 | 0.0675324   | 0.228586667 |
| Stmn3         | chr2:181041163-181049205 | 0.067524333 | 0           |
| Gm16833       | chr9:9236287-9260885     | 0.067402    | 0.121112667 |
| Sbk2          | chr7:4908682-4915950     | 0.067306    | 0           |
| Dzip1l        | chr9:99530013-99569675   | 0.067252333 | 0.809803333 |
| Padi2         | chr4:140462274-140508501 | 0.067183333 | 0.4451545   |
| Lhpp          | chr7:139802325-139898102 | 0.067129667 | 0.243775667 |
| Vwa5b1        | chr4:138124883-138179907 | 0.067085    | 0           |
| Mcm8          | chr2:132642070-132669924 | 0.0670016   | 0.388220433 |
| BC028528      | chr3:95688895-95695853   | 0.066829667 | 0           |
| BC024386      | chr7:148091962-148093866 | 0.066794667 | 0           |
| Tmprss5       | chr9:48910883-48925693   | 0.066489333 | 0.694726667 |
| Runx3         | chr4:134676559-134733905 | 0.066465333 | 0.182757    |
| Ccdc159       | chr9:21731914-21740316   | 0.0663671   | 4.475626    |
| Klhdc8a       | chr1:134195202-134203934 | 0.066293033 | 0.181016    |
| Kcnj15        | chr16:95479257-95521865  | 0.066289333 | 4.086086667 |
| Gp5           | chr16:30307778-30310865  | 0.066176    | 0.76629     |
| Sardh         | chr2:27043912-27102823   | 0.066037333 | 0.0241749   |
| Hrnr          | chr3:93123670-93137494   | 0.065965467 | 0.283357    |
| Cntn3         | chr6:102113299-102414661 | 0.065595    | 0           |
| Cntn2         | chr1:134406001-134439517 | 0.065588667 | 0.042253133 |
| Lect2         | chr13:56643820-56649899  | 0.065469667 | 0.151348667 |
| Phf19         | chr2:34749274-34769496   | 0.065435867 | 0.39741     |
| Lrr1          | chr12:70269800-70279997  | 0.0654073   | 0.478606667 |
| Pemt          | chr11:59784118-59850341  | 0.065375    | 0           |



|               |                           |             |             |
|---------------|---------------------------|-------------|-------------|
| 4921508A21Rik | chr11:55005220-55011184   | 0.0652807   | 0.037371667 |
| Kcnk16        | chr14:21081977-21088384   | 0.065273667 | 15.350942   |
| 4930524L23Rik | chrX:7150725-7158142      | 0.064992133 | 6.5319338   |
| Islr          | chr9:58004070-58007028    | 0.064901667 | 0           |
| Cd101         | chr3:100797451-100833418  | 0.064768    | 0.044605667 |
| Rp111         | chr14:64611267-64652343   | 0.064757367 | 0           |
| Tmem74        | chr15:43698240-43701575   | 0.064633    | 0           |
| C8b           | chr4:104438921-104477153  | 0.064545    | 0.096885667 |
| Obsl1         | chr1:75482399-75503027    | 0.064290667 | 1.113527667 |
| 4933411G11Rik | chr5:143942695-143966747  | 0.064184667 | 0           |
| Pvalb         | chr15:78021547-78034586   | 0.064029    | 0           |
| Fbxw21        | chr9:109041967-109064536  | 0.063923667 | 0           |
| Tmem59l       | chr8:73007769-73011257    | 0.063873333 | 0           |
| Accsl         | chr2:93695519-93709260    | 0.063857    | 0           |
| Gm13247       | chr4:145658643-145696039  | 0.063655333 | 0           |
| Xlr4a         | chrX:70319683-70327846    | 0.0636465   | 0.043398    |
| Fam3b         | chr16:97692692-97726543   | 0.063640333 | 1.400076    |
| Vmn1r65       | chr7:5959351-5962612      | 0.0632953   | 0           |
| Tm4sf20       | chr1:82753223-82765031    | 0.063083    | 0.837593333 |
| Gm16894       | chr1:40133056-40142696    | 0.062952667 | 0.043352667 |
| Chrn3         | chr8:28479182-28510202    | 0.062946    | 0           |
| Icam4         | chr9:20833816-20834975    | 0.062650333 | 0           |
| Hrh1          | chr6:114347929-114433290  | 0.062615    | 0.011913833 |
| Slc11a1       | chr1:74421776-74432625    | 0.062541    | 0           |
| Olfr613       | chr7:110698881-110704018  | 0.062501    | 0.012526067 |
| Fscb          | chr12:65572319-65575885   | 0.062465133 | 0           |
| Gm3020        | chr14:3757740-3775300     | 0.062421459 | 7.45E-08    |
| Glra4         | chrX:133292212-133314260  | 0.0623813   | 0           |
| Hsd3b5        | chr3:98422558-98449457    | 0.062157    | 0           |
| Syt17         | chr7:125525369-125587066  | 0.062057    | 4.722249333 |
| Angpt4        | chr2:151737067-151770390  | 0.061792333 | 0.085107333 |
| Gm11437       | chr11:83961864-83980978   | 0.061480333 | 0.303797333 |
| Cfd           | chr10:79353597-79355401   | 0.061243667 | 4.598266667 |
| Atoh8         | chr6:72156171-72185571    | 0.061082333 | 0.914006667 |
| 9030418K01Rik | chr2:178149238-178156866  | 0.060871667 | 0           |
| Lyzl6         | chr11:103492388-103500188 | 0.060703    | 0           |
| Apitd1        | chr4:148502457-148511709  | 0.060648    | 1.478423333 |
| Tmod4         | chr3:94928435-94933130    | 0.060645    | 0.041292667 |
| Myl4          | chr11:104411976-104448533 | 0.060613    | 0.525672    |
| Naip1         | chr13:101177724-101222819 | 0.0605731   | 0.388997333 |
| Cd1d2         | chr3:86790507-86793454    | 0.060557167 | 0.0773872   |
| Grid2ip       | chr5:144119016-144153477  | 0.060458667 | 1.019674667 |
| Rasal1        | chr5:121098830-121129602  | 0.060397533 | 0.039614833 |
| Psg16         | chr7:17659388-17684320    | 0.060313667 | 0           |
| Ces1g         | chr8:95826267-95861108    | 0.060139667 | 0.464613833 |
| Cyp2c69       | chr19:39917149-39961259   | 0.060114    | 0           |
| BC051537      | chr17:34220787-34232254   | 0.059885669 | 0.023073367 |
| Pira4         | chr7:3789728-3849694      | 0.059854333 | 0.000047998 |
| Gm9159        | chrX:100740838-100743038  | 0.0595808   | 0.042336333 |
| Trpv1         | chr11:73051760-73074009   | 0.0594911   | 3.02725     |
| Magee2        | chrX:102050290-102052606  | 0.059368667 | 0.063891    |
| Bcl2l15       | chr3:103636618-103658541  | 0.059227    | 0.190886333 |

|                |                           |             |             |
|----------------|---------------------------|-------------|-------------|
| Dpf1           | chr7:30089023-30102605    | 0.059157667 | 0.140394733 |
| Traf1          | chr2:34798777-34817292    | 0.0591116   | 0           |
| Jph2           | chr2:163161977-163223729  | 0.059011333 | 0           |
| Glp1r          | chr17:31038811-31073455   | 0.058991067 | 47.0633     |
| Pla2g4d        | chr2:120091604-120114805  | 0.058865833 | 0.013837433 |
| E230029C05Rik  | chr7:97177668-97188790    | 0.0587      | 0           |
| Adam32         | chr8:25946614-26059276    | 0.058542667 | 0           |
| Nlrp10         | chr7:116065366-116073672  | 0.058516333 | 2.179307633 |
| Fmod           | chr1:135934091-135944854  | 0.0579804   | 0.0763039   |
| Syngn4         | chr7:53142214-53152081    | 0.057912    | 0.190347    |
| Nr2e3          | chr9:59790577-59797886    | 0.05774     | 0.0156979   |
| Slmo1          | chr18:67624502-67640235   | 0.057648033 | 0.797770667 |
| Zan            | chr5:137819864-137918292  | 0.057624733 | 0.1154363   |
| 6330406I15Rik  | chr5:150214380-150234278  | 0.0576108   | 0           |
| Olfr691        | chr7:112485259-112486228  | 0.057530333 | 0           |
| Col28a1        | chr6:7947807-8142617      | 0.057508    | 0.055882    |
| Wdr17          | chr8:55714968-55809721    | 0.057333    | 0.407926667 |
| Gje1           | chr10:14435431-14438020   | 0.057224667 | 0           |
| Abcg8          | chr17:85082470-85099673   | 0.057167267 | 0           |
| 4930505A04Rik  | chr11:30326005-30371829   | 0.057050667 | 0           |
| Ptpv           | chr1:137005074-137029152  | 0.0570397   | 0           |
| Gm6578         | chr6:12049522-12059580    | 0.057004333 | 0.036671333 |
| Gm1995         | chr12:89099797-89104138   | 0.056919667 | 0.040712    |
| Rad54b         | chr4:11486066-11542955    | 0.056897807 | 1.396290231 |
| Gm10825        | chr10:22122618-22127276   | 0.056788867 | 0.164576533 |
| Svopl          | chr6:37933738-37996996    | 0.056742667 | 0.239469667 |
| Slc18a3        | chr14:33275622-33278036   | 0.056728333 | 0.0254833   |
| 9630028B13Rik  | chr1:187253235-187265698  | 0.056655367 | 0.168395    |
| Flt1           | chr5:148373771-148537564  | 0.056639    | 0           |
| 4933402D24Rik  | chr1:63801482-63815841    | 0.056476333 | 0.021759733 |
| Zpbp           | chr11:11180042-11362422   | 0.056393667 | 0.107892667 |
| Sftpb          | chr6:72253241-72264364    | 0.05639     | 0.230372667 |
| Slc7a2         | chr8:41947720-42007424    | 0.0563598   | 0.556593667 |
| Irx4           | chr13:73397944-73407068   | 0.056273267 | 1.602493333 |
| Eya4           | chr10:22823973-23069709   | 0.056258    | 0           |
| Igf2           | chr7:149836672-149846940  | 0.056114333 | 0.131509667 |
| Col8a2         | chr4:125964037-125991574  | 0.056098533 | 0.115838667 |
| Slc46a2        | chr4:59918770-59927928    | 0.0558359   | 0.924289667 |
| Cngb3          | chr4:19207996-19437770    | 0.055589    | 0.0189251   |
| Tcerg1l        | chr7:145400654-145589413  | 0.055514667 | 0.442043333 |
| 3300005D01Rik  | chr17:5798656-5803242     | 0.055346333 | 0           |
| Krtap5-4       | chr7:149489406-149490408  | 0.055132333 | 0           |
| Gdf9           | chr11:53246787-53251404   | 0.054775333 | 0           |
| Itpka          | chr2:119568072-119576989  | 0.054638    | 0           |
| Gcgr           | chr11:120392040-120400298 | 0.054552667 | 0.2555409   |
| Ctla4          | chr1:60965868-60972674    | 0.054489333 | 0.215013333 |
| B020004J07Rik  | chr4:101507573-101516627  | 0.054368767 | 0.045862667 |
| 9930111J21Rik2 | chr11:48779318-48792900   | 0.054284    | 0           |
| Xirp1          | chr9:119922872-119932716  | 0.054280667 | 0           |
| Ptafr          | chr4:132119981-132136781  | 0.054230667 | 0.017443567 |
| Vstm2l         | chr2:157740388-157770455  | 0.054226333 | 0           |
| Col2a1         | chr15:97806032-97835155   | 0.054089333 | 0           |

|               |                           |             |             |
|---------------|---------------------------|-------------|-------------|
| Tbkbp1        | chr11:96997484-97011026   | 0.0540343   | 0.021527667 |
| Kifc1         | chr17:34012610-34027578   | 0.053969267 | 0.293575733 |
| Olfr635       | chr7:111127689-111128655  | 0.053955333 | 0           |
| Sh3gl3        | chr7:89319727-89455927    | 0.053936067 | 0.048439667 |
| Sycp1-ps1     | chr7:19371650-19374763    | 0.053896967 | 0.029019933 |
| Fbn2          | chr18:58168276-58369580   | 0.0538683   | 0.0290093   |
| 1700030L20Rik | chr3:136098233-136112313  | 0.053783733 | 0.123058167 |
| Aim2          | chr1:175350734-175396167  | 0.053729333 | 0.084476333 |
| Aurkb         | chr11:68859144-68865164   | 0.053678    | 0.813310333 |
| Apol8         | chr15:77579042-77585659   | 0.053631    | 1.498741333 |
| Mmp19         | chr10:128227965-128237880 | 0.053446733 | 1.659745    |
| Cdhr1         | chr14:37891034-37911497   | 0.053440667 | 1.109695667 |
| D030047H15Rik | chr7:4077941-4088528      | 0.053252333 | 0.0125376   |
| Mical1        | chr10:41196119-41206836   | 0.053190333 | 0.9344861   |
| Cyp2u1        | chr3:130993408-131006145  | 0.053189833 | 0.144327833 |
| Pax6          | chr2:105509052-105537521  | 0.053134333 | 0.242210667 |
| Slc6a11       | chr6:114081234-114199880  | 0.052873667 | 0.160212333 |
| 2010002N04Rik | chr18:60633844-60661637   | 0.052801333 | 0.015812833 |
| C4b           | chr17:34865325-34880842   | 0.0526682   | 0           |
| Muc5ac        | chr7:148974915-149005040  | 0.052620333 | 0.006770233 |
| Spata20       | chr11:94340217-94346624   | 0.052555    | 0           |
| Slfnl1        | chr4:120204835-120209266  | 0.052553333 | 0.282173667 |
| Gm8300        | chr12:88855265-88859215   | 0.052533667 | 0           |
| Hnf1a         | chr5:115398988-115421071  | 0.052513667 | 0.0852209   |
| Gm13278       | chr4:88442645-88444107    | 0.0524855   | 0.184939333 |
| Tdrd6         | chr17:43752283-43767248   | 0.052412067 | 0.104185133 |
| Gm4827        | chr16:50019770-50072965   | 0.052378    | 0           |
| Foxf2         | chr13:31717684-31723275   | 0.052326233 | 1.451013333 |
| Gm10413       | chr14:6956219-6964661     | 0.052094    | 0           |
| Mrgpra9       | chr7:54490288-54508218    | 0.052042667 | 0           |
| Mfap2         | chr4:140566338-140571899  | 0.051732667 | 1.9941      |
| Pdgfd         | chr9:6168611-6377519      | 0.051459    | 0.44297     |
| Card9         | chr2:26207831-26215067    | 0.051422033 | 0.091154667 |
| Gpr65         | chr12:99506866-99514842   | 0.051383667 | 0.0307764   |
| Olfr856-ps1   | chr9:19461482-19463124    | 0.0513814   | 1.991558    |
| 4933433G19Rik | chr13:67097753-67133341   | 0.051308667 | 1.642711    |
| Dmrtc1a       | chrX:100098559-100104026  | 0.051239    | 0           |
| Katnal2       | chr18:77231938-77286035   | 0.051207333 | 1.648006667 |
| A930009A15Rik | chr10:115007041-115019510 | 0.051178667 | 0.042217333 |
| Fgd1          | chrX:147481775-147523629  | 0.0511473   | 0.621298    |
| Fam131c       | chr4:140924134-140940090  | 0.051122    | 0.206683    |
| Ankrd34b      | chr13:93195923-93211613   | 0.0510962   | 0.036071333 |
| 6030466F02Rik | chr8:126257857-126263841  | 0.05108     | 0.302341667 |
| Mrgprh        | chr17:13068899-13070708   | 0.051008333 | 0           |
| Aire          | chr10:77492775-77506325   | 0.050791333 | 0           |
| Ryr2          | chr13:11645369-12199212   | 0.050706167 | 0.018603233 |
| Gpr151        | chr18:42737673-42739306   | 0.050626867 | 0.029915067 |
| Opn5          | chr17:42693731-42748262   | 0.050534    | 0.3917809   |
| BC055402      | chr1:57257488-57271840    | 0.050510667 | 0           |
| Cacng5        | chr11:107735918-107776369 | 0.050346333 | 0           |
| Gm4070        | chr7:113300049-113358851  | 0.050086803 | 0           |
| BC039771      | chr2:145526930-145579408  | 0.050039667 | 0.617083667 |

|               |                           |             |             |
|---------------|---------------------------|-------------|-------------|
| Golt1a        | chr1:135206399-135219603  | 0.049976667 | 0.535933333 |
| Ptplad2       | chr4:88058833-88084830    | 0.049906667 | 0.137469767 |
| Olfir920      | chr9:38560380-38564448    | 0.049891333 | 0.057668    |
| Wnt10a        | chr1:74838592-74850749    | 0.049863    | 3.528614667 |
| Gm3230        | chr2:19577432-19579524    | 0.049827    | 0.044766333 |
| BC052688      | chr13:61872939-61888642   | 0.049812333 | 0.074453667 |
| Kbtbd13       | chr9:65236490-65239459    | 0.049808367 | 0.010178233 |
| Myo1a         | chr10:127142311-127157996 | 0.049723    | 0.044673    |
| Dnm3          | chr1:163917432-164408165  | 0.049651    | 6.44059     |
| Hgfac         | chr5:35384201-35391085    | 0.049537333 | 0.712096667 |
| Gabbr2        | chr4:46676769-47004586    | 0.049507    | 0.239832333 |
| Sorcs1        | chr19:50217790-50753136   | 0.049398    | 0           |
| Tbxas1        | chr6:38868984-39034578    | 0.049383333 | 0.27632     |
| Gm10789       | chr16:90142481-90147072   | 0.049325    | 0.1460841   |
| Ucn3          | chr13:3939933-3944595     | 0.049307    | 0           |
| Olfir156      | chr4:43833206-43834305    | 0.049114667 | 0           |
| Pcsk5         | chr19:17507321-17912122   | 0.048952    | 0           |
| Cxcl15        | chr5:91223559-91232093    | 0.048917    | 0           |
| BC051019      | chr7:116855694-116867285  | 0.048750333 | 1.767393333 |
| 4930556M19Rik | chr15:10644590-10719878   | 0.048749    | 0.023767267 |
| Ikzf1         | chr11:11586215-11672929   | 0.048742233 | 2.2666883   |
| Fkbp14        | chr6:54527598-54543122    | 0.0487108   | 1.231934667 |
| Stab1         | chr14:31952202-31981827   | 0.048539367 | 0.162877333 |
| Olfir1318     | chr2:111996054-111997164  | 0.048514    | 0           |
| Armc2         | chr10:41634796-41738188   | 0.0484771   | 0           |
| Gm5464        | chr14:67487686-67489842   | 0.048188    | 0           |
| Nlrc4         | chr17:74825634-74858448   | 0.048126667 | 0.038700333 |
| Klk1b5        | chr7:51471844-51476073    | 0.048031333 | 5.386133333 |
| Cenpw         | chr10:29915814-29920346   | 0.048019333 | 0.645966667 |
| Ccin          | chr4:43996375-43998405    | 0.047972333 | 0           |
| Nos3          | chr5:23870636-23890292    | 0.047925333 | 0.021754681 |
| 4930528D03Rik | chr13:59835010-59838831   | 0.0478721   | 0.022746467 |
| Tbx1          | chr16:18581805-18587062   | 0.047808033 | 0.993295    |
| 4933405L10Rik | chr8:108232202-108234068  | 0.047770667 | 0           |
| Psg23         | chr7:19191691-19201850    | 0.047625    | 0           |
| Ndp           | chrX:16462647-16488890    | 0.047474333 | 0           |
| Art2b         | chr7:108727373-108729675  | 0.047376    | 0           |
| Wdhd1         | chr14:47860618-47896532   | 0.047308667 | 1.529252    |
| Sema6b        | chr17:56262507-56279766   | 0.047276    | 0.073995333 |
| Peli3         | chr19:4931854-4943092     | 0.047227    | 0.233745    |
| 3110045C21Rik | chr1:171899539-171902527  | 0.047202333 | 0.363733333 |
| Reln          | chr5:21390271-21850523    | 0.047077933 | 0.57195     |
| Dact2         | chr17:14332236-14340838   | 0.047069667 | 0.289128    |
| Cd38          | chr5:44260065-44303613    | 0.047022    | 0.50416     |
| Cd48          | chr1:173612185-173635388  | 0.046847667 | 0           |
| Bco2          | chr9:50341191-50363243    | 0.046814667 | 0.126260333 |
| Gm10415       | chr6:126236666-126278704  | 0.046781667 | 0.0322164   |
| Spag5         | chr11:78115092-78135956   | 0.0467483   | 0.268942633 |
| 9530091C08Rik | chr9:68613152-68621129    | 0.046395367 | 0.664944067 |
| EU599041      | chr7:50469408-50482212    | 0.0462191   | 0.104352367 |
| F830002L21Rik | chr10:43313232-43350719   | 0.046186633 | 0.034629    |
| Stard8        | chrX:96237919-96270067    | 0.046030667 | 0           |

|               |                           |             |             |
|---------------|---------------------------|-------------|-------------|
| 1300002K09Rik | chr4:45861818-45899880    | 0.046018333 | 0           |
| Gm13483       | chr2:50152329-50289487    | 0.04596     | 0.132239333 |
| Cthrc1        | chr15:38908477-38918665   | 0.045767    | 0           |
| Gml           | chr15:74643884-74649245   | 0.045712667 | 0           |
| Pde6g         | chr11:120308923-120314797 | 0.045381    | 0           |
| Krtap10-4     | chr10:77288913-77289815   | 0.045184    | 0           |
| Ptk6          | chr2:180929828-180937494  | 0.04517     | 1.327016233 |
| Gja6          | chrX:157340047-157344984  | 0.045135667 | 1.008053333 |
| ltga5         | chr15:103174717-103197179 | 0.045123    | 0.020269967 |
| Gm11186       | chr11:52924952-52933558   | 0.045058333 | 0           |
| Bnc2          | chr4:83918445-84320990    | 0.045056667 | 0.526892667 |
| Arhgef33      | chr17:80706746-80788029   | 0.0450409   | 0.447091533 |
| Trpc4         | chr3:53959978-54122393    | 0.045037667 | 0           |
| Gm20324       | chr15:82729509-82736246   | 0.045019333 | 0.062005667 |
| Gm12888       | chr4:120988920-120997522  | 0.044965667 | 0.657676667 |
| Gpr77         | chr7:16819933-16829503    | 0.044952643 | 0           |
| 2010001M09Rik | chr18:35806918-35809021   | 0.044924333 | 0.121084333 |
| Pira11        | chr7:3789755-3849695      | 0.044808    | 0.014777033 |
| 4930417O22Rik | chr11:101813734-101821888 | 0.044781    | 0           |
| Dtx1          | chr5:121130272-121161678  | 0.044587333 | 0.449313333 |
| Sema3d        | chr5:12383165-12588943    | 0.044571333 | 0.554746333 |
| Gm4070        | chr7:113043632-113102481  | 0.044492137 | 0           |
| Cyp1b1        | chr17:80106292-80114381   | 0.044486333 | 0.80956     |
| 1700023F06Rik | chr11:103060260-103069872 | 0.044478333 | 0.193189333 |
| Hrct1         | chr4:43740069-43740982    | 0.044476667 | 0           |
| Asxl3         | chr18:22503589-22688728   | 0.0441269   | 0.007333333 |
| Ston1         | chr17:89025894-89045064   | 0.044115667 | 1.162038    |
| Cd244         | chr1:173489323-173515447  | 0.044046667 | 0.0079146   |
| Slc18a1       | chr8:71561606-71613121    | 0.0440444   | 7.310833333 |
| 3110007F17Rik | chrX:120217167-120256902  | 0.044038    | 10.48676333 |
| Sdpr          | chr1:51345969-51359804    | 0.044009467 | 0.834131    |
| Olfr1350      | chr7:6522703-6523630      | 0.043608    | 0           |
| 4930447N08Rik | chr3:122498008-122504898  | 0.043533667 | 0.40329     |
| Olfr1420      | chr19:11970512-11971442   | 0.043426    | 0           |
| Onecut2       | chr18:64500017-64558142   | 0.043307333 | 0.082965833 |
| Nodal         | chr10:60880719-60888085   | 0.043290667 | 1.046047667 |
| Olfr148       | chr9:39421153-39422086    | 0.043246    | 0           |
| B4galnt4      | chr7:148247172-148258018  | 0.043186667 | 1.974762667 |
| Tnfrsf4       | chr4:155387803-155390698  | 0.043160667 | 0.071206333 |
| Atp8a2        | chr14:60266577-60705671   | 0.043111767 | 0.348408    |
| Gvin1         | chr7:113300049-113358854  | 0.043071483 | 0           |
| Gm16432       | chr1:179921565-179978422  | 0.043028    | 0.320315133 |
| D2Ertd750e    | chr2:118639738-118661948  | 0.042993333 | 0.879924    |
| Gck           | chr11:5800825-5849602     | 0.042903    | 0.402333333 |
| Ptpn5         | chr7:54333169-54389054    | 0.042787333 | 0           |
| Olfr1380      | chr11:49377424-49378360   | 0.0427873   | 0.042520333 |
| Ret           | chr6:118101765-118147762  | 0.0424873   | 0.3074132   |
| Vmn2r31       | chr7:7336695-7352338      | 0.042460133 | 0.0413409   |
| Amdhd1        | chr10:92986082-93002778   | 0.042411667 | 0           |
| Inhbe         | chr10:126786457-126788828 | 0.042368667 | 0           |
| Podn          | chr4:107687397-107704695  | 0.042266667 | 0.079601333 |
| 4930474N09Rik | chr12:100399486-100401018 | 0.042222    | 0           |

|               |                           |             |             |
|---------------|---------------------------|-------------|-------------|
| Olf455        | chr6:42488065-42489019    | 0.042024667 | 0.045226    |
| Nos1          | chr5:118317127-118403820  | 0.041810667 | 0           |
| Klhl34        | chrX:154256366-154258301  | 0.0417618   | 0           |
| Pde4b         | chr4:101927346-102279867  | 0.041715667 | 1.251682667 |
| Fam101b       | chr11:75832696-75841284   | 0.0416294   | 0.646523333 |
| 4933404O12Rik | chr5:137395015-137412979  | 0.041563    | 2.060487    |
| Tktl1         | chrX:71422597-71453837    | 0.041473667 | 0.300546633 |
| Dlx2          | chr2:71381464-71384811    | 0.041437    | 0.512216333 |
| Glpr2         | chr4:43970573-43991990    | 0.041411367 | 0.046573    |
| Col14a1       | chr15:55139304-55352358   | 0.0410332   | 0           |
| Rab33a        | chrX:45872646-45883409    | 0.040977667 | 1.767156667 |
| Gm7104        | chr12:89521310-89525514   | 0.040837333 | 0           |
| Grip2         | chr6:91711502-91757387    | 0.040527833 | 1.148623333 |
| Pcdha6        | chr18:37127409-37347311   | 0.040501008 | 1.84E-08    |
| Tgm6          | chr2:129949020-129979961  | 0.040330333 | 3.463286    |
| 1700026D08Rik | chr7:90924126-90943349    | 0.040276667 | 13.86206667 |
| Slc5a12       | chr2:110437455-110489502  | 0.040228667 | 0           |
| Ccdc27        | chr4:153400752-153416786  | 0.039974733 | 0.0329363   |
| Cacna1g       | chr11:94269704-94335512   | 0.039921667 | 0.055933    |
| Cym           | chr3:107014212-107024650  | 0.03983     | 0           |
| Tnnt3         | chr7:149684740-149701914  | 0.039775667 | 0           |
| 4930483K19Rik | chr10:76008615-76024971   | 0.039713333 | 0.354579667 |
| Dock10        | chr1:80497647-80755128    | 0.039581733 | 0.126681667 |
| Cd163         | chr6:124254668-124280545  | 0.039483567 | 0           |
| Fam65b        | chr13:24706478-24825675   | 0.039465267 | 0.5230648   |
| Slc34a2       | chr5:53440591-53462902    | 0.039424    | 0           |
| Hnf4g         | chr3:3508029-3659800      | 0.039364333 | 0.077805667 |
| D930020B18Rik | chr10:121078756-121130970 | 0.038863333 | 0.062736    |
| Skint1        | chr4:111678873-111702143  | 0.038843333 | 0           |
| Gm1715        | chr9:52487967-52606877    | 0.038790667 | 2.80038     |
| Klb           | chr5:65739649-65775242    | 0.038719    | 0.182620067 |
| 5830403M04Rik | chr5:100506980-100524292  | 0.038636667 | 0.327499667 |
| Mageb3        | chr2:121779506-121781828  | 0.038616667 | 0           |
| Dpys          | chr15:39600030-39689016   | 0.038614    | 0.086942667 |
| 9330178D15Rik | chr3:155639317-155671556  | 0.038575667 | 0           |
| Gpr44         | chr19:11011649-11017001   | 0.038525335 | 1.88E-09    |
| Vwa1          | chr4:155142603-155148670  | 0.038502    | 1.470448267 |
| Exo1          | chr1:177810908-177841527  | 0.038496333 | 0.198778233 |
| C130026L21Rik | chr5:112010580-112016173  | 0.038401667 | 0           |
| Gvin1         | chr7:113043632-113102484  | 0.038372483 | 0           |
| Hes5          | chr4:154335031-154336480  | 0.038368    | 0.111748467 |
| Apol7c        | chr15:77355296-77363745   | 0.038348333 | 0           |
| Alk           | chr17:72218327-72953647   | 0.038329    | 0.044274667 |
| Pkdrej        | chr15:85645105-85652163   | 0.038244    | 0.221335    |
| Ccdc74a       | chr16:17646562-17650831   | 0.038188333 | 1.225192667 |
| Gpr82         | chrX:13238488-13244559    | 0.038175    | 0.341762333 |
| Nkx2-2        | chr2:147003281-147012138  | 0.038163667 | 0.441123333 |
| Cd200r3       | chr16:44943790-44981493   | 0.038152333 | 0           |
| Epb4.9        | chr14:71001990-71035855   | 0.037971    | 0.137318667 |
| H2-DMb2       | chr17:34282360-34288040   | 0.037909333 | 0.536523333 |
| Cyp2e1        | chr7:147949730-147960876  | 0.037908633 | 0.238853633 |
| C8g           | chr2:25354175-25356026    | 0.037759667 | 0.542793333 |

|               |                           |             |             |
|---------------|---------------------------|-------------|-------------|
| Gm13288       | chr4:88451434-88454284    | 0.037725594 | 0.5886799   |
| Gm12250       | chr11:57997344-58003700   | 0.037628667 | 0           |
| Nol4          | chr18:22851655-23200154   | 0.037522    | 0.360148667 |
| Gm4303        | chr10:99803471-99804396   | 0.037461667 | 0           |
| Gm4305        | chr10:99813726-99814636   | 0.037392    | 0           |
| Ciita         | chr16:10480164-10527657   | 0.037168567 | 0.0258882   |
| Btg4          | chr9:50924105-50927805    | 0.037043333 | 0.433673333 |
| Hdx           | chrX:108688812-108810688  | 0.036981367 | 0           |
| Cdca5         | chr19:6085096-6091773     | 0.036861667 | 0.599394867 |
| Rtbdn         | chr8:87470889-87480502    | 0.036818333 | 0           |
| Acot3         | chr12:85393100-85400514   | 0.036637    | 0.071218    |
| Stard6        | chr18:70632198-70660717   | 0.036626667 | 0           |
| Npl           | chr1:155350145-155396844  | 0.036595667 | 0           |
| 1700129C05Rik | chr14:59751876-59761730   | 0.036481333 | 0           |
| 5430421N21Rik | chr15:101315560-101321943 | 0.0364648   | 0.814451    |
| Clca2         | chr3:144459522-144482458  | 0.036301667 | 0.540892667 |
| Foxd2         | chr4:114578884-114581503  | 0.036241333 | 0           |
| Klkb1         | chr8:46354806-46380189    | 0.036231667 | 0           |
| Mill2         | chr7:19425314-19444002    | 0.036143333 | 0           |
| 4933405E24Rik | chr11:53991273-54026790   | 0.035894667 | 0           |
| Hdh3          | chr4:62160087-62163234    | 0.035812667 | 6.264363333 |
| Myl9          | chr2:156601199-156607393  | 0.035812667 | 4.238753333 |
| Pin1-ps1      | chr2:104554082-104556447  | 0.035812667 | 0           |
| Accn4         | chr1:75447084-75470915    | 0.035781    | 0           |
| Ssxb10        | chrX:7904549-7913361      | 0.035675667 | 0           |
| Hfm1          | chr5:107269215-107354909  | 0.035552667 | 0           |
| Gm20187       | chr12:27775101-27799860   | 0.035460667 | 0           |
| Arhgdib       | chr6:136872229-136890238  | 0.035128333 | 0.252482667 |
| AI197445      | chr13:108259901-108269268 | 0.035122    | 0           |
| Rho           | chr6:115881944-115888848  | 0.0350839   | 0.042198333 |
| Bpifa1        | chr2:153968615-153974953  | 0.034971    | 25.041      |
| Slc30a3       | chr5:31388478-31395900    | 0.034906    | 0.075130333 |
| Gm10532       | chr18:75674298-75682460   | 0.034731    | 0.065374667 |
| Eda           | chrX:97170944-97596099    | 0.034669333 | 0.280323333 |
| Numbl         | chr7:28043779-28067169    | 0.034603667 | 0.120112667 |
| Elovl2        | chr13:41277750-41315772   | 0.03447     | 0.037095667 |
| Plxnb3        | chrX:71002441-71017849    | 0.034429367 | 0.409503667 |
| 5730403I07Rik | chr9:77214218-77247223    | 0.034331    | 0           |
| Gcm1          | chr9:77899764-77913431    | 0.034324267 | 0           |
| Col4a3        | chr1:82583495-82718634    | 0.0343033   | 0.600693333 |
| Gm5415        | chr1:32600390-32604138    | 0.034188403 | 0.0087221   |
| Cdhr3         | chr12:33718660-33777740   | 0.034185    | 2.45703     |
| Gm13285       | chr4:88446223-88446772    | 0.034011471 | 0.027304667 |
| Gal3st3       | chr19:5298330-5308739     | 0.0338656   | 0.085232633 |
| BC049715      | chr6:136777363-136789075  | 0.033689334 | 0.326628    |
| Rgs17         | chr10:4424140-4520877     | 0.033602367 | 0.025558733 |
| Cyp2w1        | chr5:139828570-139832987  | 0.033531333 | 0           |
| Lass1         | chr8:72839673-72855487    | 0.033508333 | 0           |
| Ofcc1         | chr13:40097250-40383380   | 0.033501333 | 0           |
| Dbx1          | chr7:56886868-56892205    | 0.033485    | 0           |
| Scn1b         | chr7:31901542-31911964    | 0.033454333 | 0           |
| Serpina3f     | chr12:105452753-105459339 | 0.0333106   | 0           |

|               |                           |             |             |
|---------------|---------------------------|-------------|-------------|
| Lhfp          | chr3:52845468-53065601    | 0.033271033 | 0.331282    |
| Has1          | chr17:17980289-17992152   | 0.033218    | 0.383215833 |
| Gm16381       | chr12:88985074-88989933   | 0.033129467 | 0           |
| Gm16381       | chr12:89080291-89085164   | 0.033129467 | 0           |
| Hoxa4         | chr6:52139685-52141702    | 0.0331242   | 0.0213091   |
| Ptprc         | chr1:139959437-140071882  | 0.033093433 | 0.034842333 |
| Raet1b        | chr10:21893680-22093919   | 0.032915433 | 0           |
| Sult5a1       | chr8:125666746-125682180  | 0.032908867 | 0.206964667 |
| Tmem207       | chr16:26503878-26526857   | 0.0328747   | 0           |
| Cldn2         | chrX:136335346-136345927  | 0.032832233 | 2.249553333 |
| Fgf13         | chrX:56315327-56387613    | 0.032812233 | 0.954629    |
| Ttll9         | chr2:152788220-152834218  | 0.032653367 | 1.02912     |
| Optc          | chr1:135793770-135804576  | 0.0325659   | 0           |
| Sgca          | chr11:94824135-94837641   | 0.032496733 | 0           |
| Smok2b        | chr17:13427736-13429320   | 0.032427267 | 0           |
| Apbb1ip       | chr2:22629846-22731173    | 0.032150267 | 0.04821     |
| Cdh20         | chr1:106665395-106892058  | 0.032120967 | 11.46448333 |
| BC030870      | chr8:67609512-67653436    | 0.0321128   | 1.714261667 |
| Rad           | chr8:107151965-107155221  | 0.0319834   | 0           |
| Mov10l1       | chr15:88813423-88885582   | 0.0318399   | 0           |
| E030013119Rik | chr2:12222872-12233942    | 0.031820533 | 0           |
| Ache          | chr5:137729504-137735691  | 0.031685633 | 0.170650667 |
| Asf1b         | chr8:86479592-86494094    | 0.031430633 | 0.024219833 |
| Ccdc144b      | chr3:35906168-35952469    | 0.0313679   | 0           |
| Slc22a29      | chr19:8234657-8293329     | 0.0312891   | 0.033672667 |
| Slc38a11      | chr2:65154689-65202083    | 0.031273    | 0.072295    |
| Xrcc2         | chr5:25195633-25211615    | 0.031204133 | 1.376593333 |
| Chia          | chr3:105916299-105935034  | 0.031037233 | 1.513093667 |
| Cdkl4         | chr17:80922889-80963174   | 0.031029    | 0.629543333 |
| Rasgef1a      | chr6:118016402-118041564  | 0.030987533 | 2.763956    |
| Ankmy1        | chr1:94766705-94799483    | 0.030916033 | 0.185173    |
| Eaf2          | chr16:36792969-36874912   | 0.030896    | 0.807246667 |
| Gm3852        | chr1:46068391-46069108    | 0.030840967 | 0.033190333 |
| Hsh2d         | chr8:74713566-74724857    | 0.030800733 | 0.249051333 |
| Twist1        | chr12:34642535-34644696   | 0.0307443   | 0           |
| Col16a1       | chr4:129725083-129776521  | 0.030740867 | 0           |
| E030002O03Rik | chr7:111301526-111313330  | 0.0305998   | 0           |
| ltga2         | chr13:115626119-115722249 | 0.030521067 | 0.319958333 |
| A830093I24Rik | chr12:4753021-4776073     | 0.030476667 | 0.272843333 |
| Krt25         | chr11:99177157-99184255   | 0.030296167 | 0           |
| Zfp936        | chr7:50432957-50447479    | 0.030281    | 0.066648767 |
| Col6a4        | chr9:105892648-105999022  | 0.0302641   | 0           |
| Kntc1         | chr5:124199734-124271602  | 0.0301991   | 0.584239667 |
| Asb15         | chr6:24478143-24523164    | 0.030144967 | 0           |
| Vmn2r14       | chr5:109644520-109653641  | 0.030093467 | 0           |
| Cntnap2       | chr6:45010059-47251370    | 0.0300921   | 0           |
| Gm4894        | chr9:49058635-49088699    | 0.0299977   | 0           |
| Tmem202       | chr9:59366491-59373308    | 0.0298876   | 0           |
| Gm16287       | chr4:138731321-138736570  | 0.029599967 | 0.013296767 |
| Heatr8        | chr4:106353021-106400535  | 0.029576433 | 0           |
| Kdm4d         | chr9:14267024-14304926    | 0.0293781   | 0.104156    |
| Afap1l1       | chr18:61889915-61946316   | 0.029366667 | 0.151059    |



|               |                           |             |             |
|---------------|---------------------------|-------------|-------------|
| Slc15a3       | chr19:10917033-10932405   | 0.029281033 | 0.220723    |
| Gm4922        | chr10:18499532-18506599   | 0.0291445   | 0.172647    |
| Stk32b        | chr5:37838063-38108392    | 0.029030233 | 0           |
| Itgb1bp2      | chrX:98644447-98648880    | 0.0288662   | 1.130006667 |
| Mageb16       | chrX:76868569-76916774    | 0.0288157   | 0.774682333 |
| Vmn2r36       | chr7:7829363-7855173      | 0.028761067 | 0.002988757 |
| Pde6b         | chr5:108817391-108860761  | 0.028744833 | 0           |
| Olfr127       | chr17:38040492-38041464   | 0.028651933 | 0           |
| Gm1110        | chr9:26687151-26730666    | 0.028624    | 0.259294033 |
| Hrg           | chr16:22951144-22961732   | 0.028589533 | 0.220305333 |
| Zpbp2         | chr11:98412410-98419979   | 0.0285389   | 0           |
| Irx5          | chr8:94881694-94885355    | 0.0285065   | 0.618765667 |
| Gm4907        | chrX:23469888-23484676    | 0.028419967 | 0           |
| Ros1          | chr10:51765731-51915050   | 0.0283512   | 0           |
| Raet1d        | chr10:22081699-22093945   | 0.028336311 | 0           |
| Olfr98        | chr17:37399677-37400607   | 0.028327233 | 0           |
| C2cd4d        | chr3:94166365-94168489    | 0.028265733 | 0           |
| Smok2a        | chr17:13414053-13420524   | 0.028252167 | 0           |
| En2           | chr5:28492235-28498706    | 0.028183767 | 0.185689    |
| Fut7          | chr2:25279213-25281893    | 0.028110267 | 1.10266     |
| Sftpd         | chr14:41985500-41998487   | 0.0280124   | 3.05555     |
| Gsdma2        | chr11:98508072-98519271   | 0.028009567 | 0.04621     |
| AW549542      | chr5:120020137-120030367  | 0.0280026   | 2.204873    |
| Cd79a         | chr7:25682529-25687216    | 0.0279873   | 0.180987633 |
| 1700027D21Rik | chr10:76025016-76032945   | 0.0278874   | 0           |
| 4930503E24Rik | chr10:123906129-123961544 | 0.027837733 | 0.050020667 |
| Fam155a       | chr8:9206009-9771023      | 0.0278154   | 0.198924667 |
| Olfr1000      | chr2:85448120-85449065    | 0.027748867 | 0           |
| Adh6a         | chr3:137976249-137994098  | 0.027640767 | 0           |
| Tlr11         | chr14:50980176-50983338   | 0.0276269   | 0           |
| Slc16a8       | chr15:79081445-79085178   | 0.027612833 | 0.3156546   |
| Serpina3c     | chr12:105385116-105392082 | 0.027555267 | 0           |
| Prr22         | chr17:56909698-56911557   | 0.0274225   | 0.999845    |
| Hsd3b3        | chr3:98545398-98567051    | 0.0272234   | 0.161690667 |
| Slc26a5       | chr5:21316472-21371422    | 0.027219667 | 0           |
| Kcnma1        | chr14:24117915-24823427   | 0.0271188   | 0.79561     |
| Grin2d        | chr7:53087852-53122051    | 0.027032667 | 1.834090833 |
| Slc25a18      | chr6:120723785-120744000  | 0.027019467 | 2.417626    |
| Ppm1j         | chr3:104583973-104588935  | 0.027007667 | 0.018599    |
| 6330512M04Rik | chr7:149512014-149558164  | 0.0270048   | 0.056376333 |
| Pax8          | chr2:24276079-24331086    | 0.0269807   | 1.033457667 |
| Rpl3l         | chr17:24864773-24873094   | 0.026903167 | 0           |
| Mfng          | chr15:78586312-78603875   | 0.026881567 | 7.062353333 |
| D630039A03Rik | chr4:57921255-57929136    | 0.026818433 | 2.686946667 |
| Gm14496       | chr2:181725930-181735792  | 0.026715467 | 0           |
| Bcl2a1a       | chr9:88851757-88857254    | 0.026680933 | 0           |
| 4930433N12Rik | chr9:3190268-3199813      | 0.026673533 | 0           |
| Hsd3b1        | chr3:98656119-98663717    | 0.026586833 | 0           |
| Crisp3        | chr17:40358725-40379207   | 0.0265602   | 0           |
| Myod1         | chr7:53631843-53634462    | 0.026554467 | 0           |
| 1700003D09Rik | chr11:98212031-98219597   | 0.026515133 | 0           |
| Vmn2r33       | chr7:7503677-7519497      | 0.0264563   | 0           |

|               |                                |             |             |
|---------------|--------------------------------|-------------|-------------|
| Gm2115        | chr7:91677463-91726849         | 0.026409867 | 1.561403333 |
| Tm6sf1        | chr7:89003907-89028954         | 0.026390203 | 0.467240227 |
| Gm10408       | chr14:3555026-3564989          | 0.026299733 | 0.1957517   |
| Gm10408       | chr14:3794429-3804392          | 0.026299733 | 0.147375333 |
| Samd3         | chr10:25949512-25991978        | 0.026235267 | 0           |
| Gm11562       | chr11:99480911-99481718        | 0.026189033 | 0.174289667 |
| Tubb1         | chr2:174276195-174283383       | 0.026138133 | 0.112517    |
| Hif3a         | chr7:17616341-17647776         | 0.026032967 | 0.466513333 |
| Gm13277       | chr4:88433880-88435342         | 0.025994333 | 0.193397033 |
| G630090E17Rik | chr10:39666717-39679959        | 0.025942267 | 6.52E-09    |
| Ccdc110       | chr8:47020002-47029499         | 0.025874967 | 0           |
| Ecm2          | chr13:49600178-49628158        | 0.0257833   | 0.016586633 |
| 9130404H23Rik | chr17:66904591-66943962        | 0.025680833 | 0           |
| Dnahc1        | chr14:32073560-32137082        | 0.025661833 | 0.575237533 |
| P2ry6         | chr7:108086147-108112880       | 0.025574267 | 0           |
| Slc5a8        | chr10:88348736-88392260        | 0.025571    | 1.69876     |
| Acta1         | chr8:126415666-126418636       | 0.025560933 | 0.41262     |
| Ltbp2         | chr12:86124161-86217445        | 0.025512233 | 0.798903333 |
| Adamts8       | chr9:30750147-30770443         | 0.025512033 | 0.213357667 |
| Sspo          | chr6:48398227-48451249         | 0.025454533 | 5.859836667 |
| 4930519G04Rik | chr5:115303722-115333888       | 0.025389583 | 0.008787033 |
| Sec14l3       | chr11:3964855-3978993          | 0.0252196   | 3.947894767 |
| Gm17830       | chr17:49443803-49452285        | 0.025189    | 0           |
| Ctla2a        | chr13:61035515-61037986        | 0.025018233 | 0.011233867 |
| 4833422F24Rik | chr2:165220949-165225894       | 0.0250029   | 0           |
| Car9          | chr4:43519897-43526597         | 0.02496     | 0.827496667 |
| AA792892      | chr5:94806364-94813359         | 0.0249248   | 0           |
| Grm1          | chr10:10405856-10802129        | 0.024897133 | 0.55315     |
| Slit1         | chr19:41674746-41818346        | 0.024864567 | 0.918594333 |
| Cx3cr1        | chr9:119957810-119977400       | 0.024808733 | 0           |
| Rtn4r         | chr16:18127798-18152501        | 0.0245077   | 0.050632    |
| Prss43        | chr9:110729193-110734008       | 0.0244977   | 0           |
| Raet1a        | chr10:21878414-22093945        | 0.024481933 | 0           |
| Krt28         | chr11:99226320-99236217        | 0.0244415   | 0           |
| Cml2          | chr6:85815415-85819131         | 0.0243999   | 0.045233433 |
| C130026I21Rik | chr1:85242918-85267141         | 0.024317167 | 0           |
| C130050O18Rik | chr5:139882340-139892046       | 0.0243067   | 0.318414667 |
| Zbtb46        | chr2:181125590-181194131       | 0.0241989   | 0.425836667 |
| Zic4          | chr9:91263809-91284186         | 0.024179    | 0           |
| Slc22a20      | chr19:5970233-5986143          | 0.0241735   | 0.066589    |
| Syt8          | chr7:149620881-149626303       | 0.024139433 | 0           |
| Vmn2r85       | chr10:129855316-129866668      | 0.0240747   | 0           |
| Tmem140       | chr6:34813145-34824946         | 0.023943149 | 1.423493369 |
| Irf8          | chr8:123260275-123280592       | 0.023887367 | 0.300456667 |
| Bard1         | chr1:71074108-71149546         | 0.023867667 | 0.129547667 |
| Mybpc3        | chr2:90958300-90976673         | 0.023798467 | 0.100452333 |
| Syt4          | chr18:31597461-31607069        | 0.023652567 | 0           |
| 9330175E14Rik | chr8:96957026-96959003         | 0.023539433 | 0.0211486   |
| Sox14         | chr9:99774524-99776589         | 0.023533467 | 0.0151393   |
| Edar          | chr10:58063535-58138444        | 0.0235024   | 0           |
|               | 10-Mar chr15:26238826-26339328 | 0.023380933 | 0           |
| Scarf1        | chr11:75327042-75340082        | 0.023378133 | 0           |

|               |                           |             |             |
|---------------|---------------------------|-------------|-------------|
| Kctd8         | chr5:69500523-69732948    | 0.023334467 | 0.324382567 |
| Prrxl1        | chr14:33413112-33462432   | 0.0233286   | 0           |
| Tspan33       | chr6:29644255-29668558    | 0.0233164   | 0.933962333 |
| Ceacam20      | chr7:20550760-20576460    | 0.023282333 | 0           |
| Vmn2r36       | chr7:8557271-8583081      | 0.0232717   | 0           |
| Jdp2          | chr12:86940054-86980828   | 0.023168833 | 0           |
| Arl5c         | chr11:97850893-97857487   | 0.0231386   | 0           |
| A630055G03Rik | chr16:10835151-10843328   | 0.023109433 | 0.305007333 |
| Art3          | chr5:92760866-92843653    | 0.0231044   | 3.15778     |
| AU015228      | chr2:129926129-129929111  | 0.023102767 | 0.0214225   |
| Igj           | chr5:88948833-88956922    | 0.023073167 | 0           |
| Zfp345        | chr2:150296726-150310799  | 0.022934833 | 0.0134767   |
| A630019I02Rik | chr13:93864787-93868923   | 0.022830373 | 0.080248667 |
| Als2cr11      | chr1:59107349-59151744    | 0.0227248   | 0           |
| Ap3b2         | chr7:88605284-88638811    | 0.022678833 | 1.226271333 |
| Pou3f1        | chr4:124334888-124337899  | 0.022318    | 0           |
| Adam12        | chr7:141074882-141416780  | 0.0222121   | 10.54152667 |
| Pla2g2c       | chr4:138281239-138300490  | 0.022201667 | 0           |
| Krtap1-4      | chr11:99443862-99444991   | 0.0221911   | 0           |
| Camkv         | chr9:107838250-107852022  | 0.022159767 | 0           |
| Prdm5         | chr6:65728955-65886371    | 0.022137    | 2.007708333 |
| Snap91        | chr9:86659238-86775207    | 0.022101533 | 0.093670667 |
| A730008H23Rik | chr1:90161402-90174132    | 0.021789028 | 1.72278158  |
| Lipi          | chr16:75540758-75586306   | 0.021784133 | 0           |
| Gadl1         | chr9:115818572-115985294  | 0.021762567 | 1.770366667 |
| Opcml         | chr9:27598853-28732633    | 0.021621933 | 0.077703333 |
| Gm216         | chr1:74408681-74415895    | 0.021565233 | 1.00987     |
| Idi2          | chr13:8952108-8960181     | 0.021472667 | 0.777831333 |
| BC051070      | chr3:106190301-106209100  | 0.021440133 | 0           |
| AI593442      | chr9:52481146-52487534    | 0.0213944   | 6.494496667 |
| Nkx6-2        | chr7:146765274-146768696  | 0.0213752   | 0.308954    |
| BC049352      | chr9:45003848-45058068    | 0.021279533 | 0           |
| Dpp10         | chr1:125228714-125942136  | 0.021213833 | 1.244604333 |
| Slc22a2       | chr17:12777054-12821354   | 0.0211513   | 0           |
| A230070E04Rik | chr14:68741808-68749428   | 0.0211199   | 0           |
| Dbh           | chr2:27021026-27038724    | 0.021068433 | 1.047716667 |
| Lct           | chr1:130181340-130224895  | 0.020990233 | 0.0056473   |
| 4930503L19Rik | chr18:70612793-70632134   | 0.0209773   | 0.094464333 |
| Gimap8        | chr6:48597232-48610874    | 0.0209336   | 0           |
| Larp6         | chr9:60560927-60586608    | 0.0208073   | 0.223177333 |
| Baalc         | chr15:38765454-38782810   | 0.0207381   | 5.675341    |
| Col22a1       | chr15:71628905-71864657   | 0.020670033 | 0           |
| Ndc80         | chr17:71845439-71876197   | 0.0204819   | 1.596701667 |
| BC018473      | chr11:116613480-116619197 | 0.020475633 | 0.009198    |
| Fcgrt         | chr7:52348362-52359192    | 0.0204577   | 0.297895333 |
| Syde1         | chr10:78047247-78054709   | 0.020309333 | 0.036493    |
| Akap6         | chr12:53800369-54252002   | 0.0202796   | 0.310038    |
| Olfr157       | chr4:43847623-43849389    | 0.0200895   | 0.172959    |
| Tmem72        | chr6:116642742-116666776  | 0.020003833 | 0           |
| Sult1d1       | chr5:87983674-87998031    | 0.019987833 | 0.295742333 |
| Proz          | chr8:13060907-13075006    | 0.0199513   | 0.753883    |
| Ctgf          | chr10:24315247-24318488   | 0.019914867 | 1.028183333 |

|               |                           |             |             |
|---------------|---------------------------|-------------|-------------|
| Gm14461       | chr2:78077703-78142387    | 0.019910333 | 0           |
| Layn          | chr9:50864884-50885199    | 0.0198345   | 1.087016667 |
| Krt33a        | chr11:99872512-99877526   | 0.0198124   | 0.097679767 |
| Gipr          | chr7:19742473-19751476    | 0.019759267 | 0.021264467 |
| Wfdc8         | chr2:164422712-164439126  | 0.0197343   | 0.0212376   |
| Rgs9bp        | chr7:36364012-36370601    | 0.019598267 | 0           |
| Slc6a19       | chr13:73818604-73838143   | 0.019584267 | 0.181095    |
| Gpr132        | chr12:114089086-114099127 | 0.019584267 | 0           |
| Prrt4         | chr6:29119229-29129584    | 0.019516667 | 0.0192689   |
| Cldn27        | chr11:117722065-117726857 | 0.019415567 | 0           |
| Nepn          | chr10:52111413-52124410   | 0.019379433 | 0           |
| Ube2cbp       | chr9:86200840-86358523    | 0.019319533 | 1.533746667 |
| Slc17a8       | chr10:89036764-89083994   | 0.019224867 | 1.4994603   |
| Vsig1         | chrX:137442146-137474011  | 0.019213367 | 0           |
| Popdc3        | chr10:45009110-45038256   | 0.0190487   | 0.6366031   |
| Kcna7         | chr7:52661329-52666752    | 0.019035233 | 0.0880083   |
| 1700071M16Rik | chr17:43725288-43728458   | 0.019029293 | 3.50E-08    |
| Gm13154       | chr4:146927385-146959310  | 0.018956767 | 0           |
| B3gnt6        | chr7:105340924-105347985  | 0.0189054   | 0.410764    |
| Rab3c         | chr13:110844395-111070414 | 0.018852667 | 0.016119497 |
| Fmo6          | chr1:164846681-164867356  | 0.018830633 | 7.3932      |
| Gm11435       | chr11:83325237-83335677   | 0.018774067 | 1.48304     |
| Hoxa5         | chr6:52151752-52154586    | 0.018751533 | 0.016847    |
| Filip1        | chr9:79663368-79825689    | 0.0187405   | 0           |
| Tlr1          | chr5:65316072-65323938    | 0.018520567 | 0           |
| Impg1         | chr9:80161136-80359045    | 0.018510967 | 0.0298816   |
| Kbtbd5        | chr9:121686724-121692937  | 0.018164233 | 0.150107    |
| 9930013L23Rik | chr7:91081366-91235015    | 0.0181079   | 0.433439    |
| Gm4307        | chr10:99823971-99824881   | 0.018037167 | 0           |
| St8sia4       | chr1:97484258-97564171    | 0.018021167 | 0           |
| Gm4303        | chr10:99808605-99809515   | 0.0180036   | 0           |
| Spata18       | chr5:74042618-74070723    | 0.017975033 | 5.305311433 |
| Oprm1         | chr10:3308331-3557940     | 0.0179715   | 0           |
| Ppef1         | chrX:157061026-157157904  | 0.017948367 | 0           |
| Gm4312        | chr10:99844280-99845194   | 0.017934633 | 0           |
| Parvg         | chr15:84155149-84173408   | 0.0178529   | 0           |
| Ces2d-ps      | chr8:107391323-107397982  | 0.017831467 | 0.176224    |
| Acsn3         | chr7:126904436-126928410  | 0.017824436 | 0.0298922   |
| Tlr7          | chrX:163742862-163768460  | 0.017678533 | 0           |
| Ncan          | chr8:72616983-72644743    | 0.017585433 | 0.754888333 |
| Mpz           | chr1:173080843-173091254  | 0.017531367 | 0.063003    |
| Sox10         | chr15:78985342-78994920   | 0.0174401   | 0           |
| Chrna9        | chr5:66358362-66368725    | 0.017433567 | 0.219280333 |
| Slc22a7       | chr17:46569133-46575426   | 0.017394767 | 0.018719833 |
| Ermep         | chr4:118848061-118862616  | 0.0172553   | 0.680981733 |
| Capn11        | chr17:45767152-45796258   | 0.017242467 | 0           |
| Nkpd1         | chr7:20104079-20110399    | 0.017165767 | 1.57332     |
| Grin2b        | chr6:135679822-136123529  | 0.0171373   | 0           |
| Sycp2         | chr2:178080000-178142363  | 0.017119567 | 0.013912267 |
| Aqp1          | chr6:55286292-55298549    | 0.017118633 | 0           |
| Gfap          | chr11:102748649-102758514 | 0.017061733 | 0           |
| Kbtbd10       | chr2:69508176-69522296    | 0.016995533 | 0.012922367 |

|               |                           |             |             |
|---------------|---------------------------|-------------|-------------|
| Ccr4          | chr9:114399433-114405662  | 0.016939267 | 0.1002304   |
| Myh2          | chr11:66984528-67011019   | 0.016893033 | 0.010181533 |
| Rftn1         | chr17:50132631-50329822   | 0.0168412   | 0.0216682   |
| Podn1         | chr8:86649887-86656416    | 0.0167156   | 0.137969333 |
| Figl1         | chr11:11700290-11708965   | 0.0165723   | 0.224836333 |
| Abp1          | chr6:48845253-48859186    | 0.016555667 | 4.10201     |
| Vwa3a         | chr7:127883070-127949054  | 0.016505733 | 0.900843333 |
| Lrrc7         | chr3:157747402-158225185  | 0.0164267   | 0           |
| Cass4         | chr2:172219293-172258360  | 0.0163833   | 0           |
| Rnf222        | chr11:68702054-68708517   | 0.0163702   | 0           |
| Abca17        | chr17:24401223-24484197   | 0.016336333 | 0.012362967 |
| Alx4          | chr2:93482590-93521496    | 0.016333067 | 0.044991333 |
| Acss3         | chr10:106373219-106560720 | 0.016280233 | 0           |
| Tyrp1         | chr4:80480133-80497622    | 0.016246267 | 0           |
| Ankrd5        | chr2:136358056-136381590  | 0.016226867 | 0.8215179   |
| 6030419C18Rik | chr9:58336409-58347549    | 0.016204267 | 0.375133333 |
| Ccr5          | chr9:124036281-124041922  | 0.016072233 | 0.51697     |
| Serpinc1      | chr1:162908736-162933145  | 0.0160215   | 0.187125    |
| Usp44         | chr10:93294299-93320832   | 0.015954733 | 0.635691    |
| Gjc2          | chr11:58989065-58996715   | 0.015921767 | 0           |
| Scg3          | chr9:75491172-75531863    | 0.015768733 | 0.213623667 |
| Pde6a         | chr18:61380152-61449372   | 0.015674667 | 0           |
| LOC624759     | chr3:158739327-158971044  | 0.0155522   | 0           |
| Gm10408       | chr14:7010438-7020406     | 0.015510667 | 0.1655641   |
| A930006I01Rik | chr2:103178757-103212921  | 0.0154818   | 0           |
| Gm4961        | chr5:30419493-30424221    | 0.015474133 | 10.01584333 |
| Fgf12         | chr16:28160183-28753288   | 0.015356033 | 0           |
| Ccdc36        | chr9:108305963-108330813  | 0.0153531   | 0.285471333 |
| Ajap1         | chr4:152747329-152856939  | 0.015278933 | 0           |
| Mylk3         | chr8:87848827-87889223    | 0.0152629   | 0           |
| Tshr          | chr12:92639432-92778949   | 0.015239033 | 0.027382433 |
| Lrp1b         | chr2:40452292-42509118    | 0.015016833 | 0           |
| Wnt7a         | chr6:91313976-91361363    | 0.014717367 | 0           |
| Icam5         | chr9:20836481-20843480    | 0.014710533 | 0           |
| 3110035E14Rik | chr1:9591347-9617223      | 0.014663    | 8.14715     |
| Vmn1r238      | chr18:3122491-3123412     | 0.0146587   | 0           |
| Vmn1r3        | chr4:3111531-3112452      | 0.0146587   | 0           |
| 4921539E11Rik | chr4:102903050-102963468  | 0.0145719   | 0.083638667 |
| Lilra6        | chr7:3859881-3867103      | 0.014464133 | 0           |
| Gucy1b3       | chr3:81835925-81878633    | 0.0144324   | 0           |
| 4930581F22Rik | chr9:34924312-34938507    | 0.014259767 | 1.008356667 |
| Gm10389       | chr15:10530047-10541406   | 0.014235567 | 0.01072819  |
| A330093E20Rik | chr18:45843140-46204914   | 0.0142273   | 0.394887667 |
| Zfp600        | chr4:146124224-146166150  | 0.0140932   | 0           |
| Ces4a         | chr8:107655699-107674009  | 0.014060867 | 0           |
| E2f1          | chr2:154385374-154395588  | 0.0138921   | 1.21098     |
| Gpr165        | chrX:93908806-93914727    | 0.0136653   | 0.511494667 |
| Clec4e        | chr6:123231806-123239889  | 0.0135371   | 0.985133333 |
| Armcx4        | chrX:131221057-131232311  | 0.013470167 | 0.664782    |
| Slc6a3        | chr13:73674194-73716120   | 0.013447733 | 1.310683    |
| Galnt5        | chr2:57850565-57891582    | 0.0134268   | 1.442446667 |
| BC013712      | chr4:132338271-132352279  | 0.013403567 | 0.0120422   |

|               |                           |             |             |
|---------------|---------------------------|-------------|-------------|
| Vmn2r86       | chr10:129883254-129892950 | 0.013374867 | 0           |
| Vmn2r9        | chr5:109271965-109281529  | 0.013374867 | 0           |
| Abcb11        | chr2:69076338-69180673    | 0.013342533 | 0.0059937   |
| Atp1a4        | chr1:174153638-174188555  | 0.013328633 | 0           |
| Chrn4         | chr9:54875962-54896351    | 0.013324567 | 0.010267633 |
| Vmn2r15       | chr5:109715287-109726575  | 0.013255733 | 0           |
| Tmem232       | chr17:65605344-65890122   | 0.013144233 | 0.037763967 |
| Abcb1a        | chr5:8660091-8748570      | 0.013132067 | 0.029821067 |
| Vmn2r57       | chr7:48655101-48704011    | 0.013122167 | 0.933116667 |
| V1rg10        | chr5:3000100-3001111      | 0.013011    | 0           |
| Vmn2r50       | chr7:10622583-10638527    | 0.012871967 | 0.004478667 |
| Nrxn2         | chr19:6418737-6533217     | 0.012800733 | 0.8358794   |
| Catsperb      | chr12:102642882-102864219 | 0.012450367 | 0           |
| Rpp40         | chr13:35986972-35998216   | 0.012374    | 1.682453333 |
| Neto1         | chr18:86564343-86671289   | 0.012278467 | 1.237441667 |
| Nfam1         | chr15:82828225-82853568   | 0.012262333 | 0           |
| Mertk         | chr2:128524732-128627924  | 0.012190367 | 0           |
| Gm14124       | chr2:150083252-150096036  | 0.0121016   | 0           |
| Adrb3         | chr8:28336247-28340060    | 0.012091567 | 0.232078433 |
| Sp9           | chr2:73109982-73113828    | 0.012007933 | 0.056076    |
| Gm2002        | chr4:42028838-42039327    | 0.011927245 | 1.11E-07    |
| Ccdc135       | chr8:97579002-97602041    | 0.0119209   | 0.556926667 |
| Gbp11         | chr5:105752044-105775491  | 0.011650033 | 0           |
| Crmp1         | chr5:37633318-37683372    | 0.011576267 | 0.167153667 |
| Grem2         | chr1:176763915-176851950  | 0.0115351   | 0.127099667 |
| AU022754      | chr15:85411571-85424138   | 0.011505667 | 0           |
| 9030425E11Rik | chr9:40494046-40592129    | 0.011495567 | 0.284539333 |
| Nlrp3         | chr11:59356187-59380458   | 0.011453867 | 0.213682667 |
| Gm2002        | chr4:42668806-42679295    | 0.011397278 | 6.13E-08    |
| Zfp872        | chr9:21992609-22006567    | 0.011365967 | 0.010211567 |
| Gm2002        | chr4:42339258-42349747    | 0.011303124 | 9.53E-08    |
| Cxcr2         | chr1:74200567-74207820    | 0.011302633 | 0.166456    |
| Scn4a         | chr11:106179906-106210704 | 0.0112757   | 0.0834712   |
| Ikzf3         | chr11:98326006-98407345   | 0.011227    | 0.359380667 |
| Armc3         | chr2:19120744-19231861    | 0.011223133 | 0.060499333 |
| Chsy3         | chr18:59334993-59570990   | 0.0111047   | 0           |
| Zfp831        | chr2:174469034-174536331  | 0.011063667 | 1.218431667 |
| Aldh1l1       | chr6:90500841-90549165    | 0.010875533 | 0           |
| C630020P19Rik | chr2:143361211-143373573  | 0.010850233 | 0.33444     |
| Cpeb1         | chr7:88491911-88599644    | 0.0108283   | 0.014745767 |
| Insm2         | chr12:56699903-56703004   | 0.010811567 | 0.235262733 |
| Acnat2        | chr4:49392716-49421023    | 0.010786667 | 0           |
| H2-Q10        | chr17:35607033-35611508   | 0.0107636   | 0           |
| Chrna3        | chr9:54859149-54874366    | 0.0107299   | 0.212082    |
| Cilp2         | chr8:72404264-72411291    | 0.010696833 | 0           |
| A230056J06Rik | chr13:59681536-59686584   | 0.0106169   | 0           |
| Atp1b4        | chrX:35669443-35689890    | 0.010585733 | 0           |
| Diras2        | chr13:52599743-52626205   | 0.010548667 | 0.047502333 |
| Iqca          | chr1:91938706-92049976    | 0.0104187   | 1.49768     |
| Tmem200c      | chr17:69186475-69192478   | 0.0104083   | 0.280534667 |
| Sspn          | chr6:145882666-145913745  | 0.0103979   | 0.060201333 |
| Sntg1         | chr1:8352741-9289811      | 0.010237567 | 0           |

|               |                           |             |             |
|---------------|---------------------------|-------------|-------------|
| Mitf          | chr6:97757051-97971352    | 0.0099861   | 0.109641    |
| Lcp2          | chr11:33947200-33992280   | 0.009960467 | 0.042877    |
| Esr1          | chr10:5342779-5734495     | 0.0099236   | 0.343496867 |
| Wfikkn2       | chr11:94097265-94103893   | 0.009822733 | 0.563640767 |
| Gm12824       | chr4:114079328-114287703  | 0.0097563   | 0           |
| E130008D07Rik | chr17:43282989-43295240   | 0.0097435   | 1.738541867 |
| Tmprss9       | chr10:80342560-80362239   | 0.009634967 | 0.222944    |
| Cdh17         | chr4:11685303-11745052    | 0.009611267 | 0.37131     |
| Hmha1         | chr10:79479416-79494216   | 0.0095583   | 0           |
| Vmn2r32       | chr7:7416679-7432684      | 0.009266923 | 0.003624133 |
| Vmn2r49       | chr7:10561593-10577488    | 0.009266923 | 0.003624133 |
| Gm973         | chr1:59573107-59691353    | 0.0092336   | 0.925266667 |
| Myom2         | chr8:15057652-15133419    | 0.009203033 | 0           |
| Tnip3         | chr6:65540391-65584034    | 0.008782133 | 2.272363333 |
| Slc9a5        | chr8:107872157-107893781  | 0.008709067 | 0.0643744   |
| Vmn2r79       | chr7:94144974-94186478    | 0.008691067 | 0           |
| Eps8l3        | chr3:107680147-107695818  | 0.008586845 | 0.325959001 |
| Islr2         | chr9:58044103-58052126    | 0.0085139   | 0           |
| Ndst3         | chr3:123229083-123375310  | 0.008512033 | 0.0065592   |
| Ano2          | chr6:125640436-125990146  | 0.0084088   | 0.852910333 |
| Hc            | chr2:34838850-34916961    | 0.008333267 | 0.579347667 |
| Ror2          | chr13:53204685-53381478   | 0.008312633 | 0.184562    |
| Ube1y1        | chrY:155155-180667        | 0.008288367 | 0           |
| Gm4312        | chr10:99798309-99799223   | 0.008277533 | 0           |
| Gm4312        | chr10:99829132-99830046   | 0.008277533 | 0           |
| Rnf17         | chr14:57021533-57143868   | 0.008259167 | 0           |
| Pcdha5        | chr18:37120093-37347311   | 0.008167713 | 0.55878003  |
| Slc4a10       | chr2:61884571-62164800    | 0.007853667 | 0           |
| Flt4          | chr11:49423180-49466241   | 0.0077544   | 0.872339467 |
| Lrrc3         | chr10:77360319-77365281   | 0.007649333 | 0.631891333 |
| Rex2          | chr4:145850573-145889553  | 0.007174633 | 0           |
| Rex2          | chr4:146395929-146434908  | 0.007174633 | 0           |
| Kctd12b       | chrX:150119696-150130823  | 0.0068168   | 0.446685667 |
| Col4a1        | chr8:11198422-11312826    | 0.006814867 | 0.008768133 |
| Ebf3          | chr7:144385353-144506128  | 0.006681    | 0.024010133 |
| Vmn2r84       | chr10:129822855-129831297 | 0.006678867 | 0           |
| Vmn2r16       | chr5:109759399-109793500  | 0.0066703   | 0           |
| Vmn2r35       | chr7:7738861-7772578      | 0.006494607 | 0           |
| Vmn2r35       | chr7:8639867-8851885      | 0.006494607 | 0           |
| Apob          | chr12:7984482-8023645     | 0.006372433 | 0           |
| Gabrb3        | chr7:64845903-65084171    | 0.0059089   | 0.180172333 |
| Duxbl         | chr14:27081743-27088586   | 0.005820333 | 0.142928633 |
| Duxbl         | chr14:26802490-26809318   | 0.005788    | 0.258344333 |
| Cytip         | chr2:57981549-58012533    | 0.005656933 | 0.1484447   |
| Pira6         | chr7:4225744-4234530      | 0.0056222   | 0           |
| Grk1          | chr8:13405080-13421949    | 0.005462423 | 0.000931847 |
| Odz1          | chrX:39885569-40627963    | 0.0053537   | 0.144391    |
| Vmn2r34       | chr7:7624539-7642109      | 0.0053096   | 0.0063717   |
| Vmn2r45       | chr7:9638310-9655801      | 0.0053096   | 0.0063717   |
| Nes           | chr3:87775014-87784373    | 0.005283033 | 0.180365333 |
| Gm2381        | chr7:50072196-50122604    | 0.005275067 | 0.019577633 |
| 1700110I01Rik | chr14:3262412-3305842     | 0.005237867 | 0           |

|               |                          |             |             |
|---------------|--------------------------|-------------|-------------|
| 1700110I01Rik | chr14:3609810-3650049    | 0.005237867 | 0           |
| 1700110I01Rik | chr14:3849203-3889441    | 0.005237867 | 0           |
| C87977        | chr4:143796664-143802920 | 0.004835867 | 0.0585783   |
| Hydin         | chr8:112790876-113134153 | 0.004809687 | 1.447856667 |
| Xcr1          | chr9:123761435-123771246 | 0.0048051   | 0.0066181   |
| Mageb16-ps1   | chrX:140987300-140990782 | 0.004776267 | 0           |
| Cgnl1         | chr9:71474315-71619409   | 0.004776033 | 0.343799    |
| Pi15          | chr1:17591981-17621020   | 0.004655767 | 0           |
| Gm13278       | chr4:88436798-88438260   | 0.004653616 | 0.1726653   |
| Lama2         | chr10:26701091-27336748  | 0.0045936   | 0           |
| Otog          | chr7:53496356-53566804   | 0.004438967 | 0           |
| Lama1         | chr17:68046604-68171985  | 0.004380567 | 0.0120668   |
| Vmn2r39       | chr7:9147158-9163091     | 0.004290667 | 0.004478667 |
| Megf10        | chr18:57292743-57457121  | 0.004279033 | 0           |
| Vmn2r42       | chr7:9927006-9944061     | 0.003992883 | 0.002497127 |
| Gdf1          | chr8:72839673-72855491   | 0.003886267 | 0.022334267 |
| Vmn2r43       | chr7:9866726-9882971     | 0.003874767 | 0.029097567 |
| Gm5936        | chrX:72082534-72088694   | 0.003851333 | 0.03095473  |
| Gm5640        | chrX:71884457-71890974   | 0.0038455   | 0.030908033 |
| Kcna2         | chr3:106904484-106917923 | 0.003838233 | 0           |
| Vmn2r44       | chr7:9744079-9759858     | 0.0036745   | 0.003939733 |
| Flnc          | chr6:29383152-29411888   | 0.0034897   | 0           |
| Pcdh17        | chr14:84843369-84936867  | 0.003361    | 0.155695    |
| Gm5065        | chr7:5302142-5312283     | 0.003147093 | 0           |
| Nphs1         | chr7:31245076-31273628   | 0.00286687  | 0           |
| Vmn2r48       | chr7:10512972-10538934   | 0.002644673 | 0           |
| Vmn2r37       | chr7:8954256-8972357     | 0.002174333 | 0.005218537 |
| Tyr           | chr7:94575914-94641921   | 0.00201354  | 0.004533633 |
| Myh4          | chr11:67051530-67073948  | 0.00179438  | 0.050288333 |
| Myh1          | chr11:67013615-67038077  | 0.001793453 | 0.001930073 |
| Mylk4         | chr13:32792695-32873648  | 0.001607423 | 0           |
| Gm3417        | chr17:15164114-15178523  | 0.001537754 | 0.000623151 |
| Gm6300        | chr3:14363209-14377566   | 0.00134776  | 0.005798683 |
| Hbb-b1        | chr7:110961041-110962437 | 0.000172587 | 0           |
| Btg3          | chr16:78360104-78377030  | 0.000105023 | 0.000101148 |
| Gm4302        | chr10:99808603-99824881  | 0.00010079  | 0           |
| Ndufs5        | chr4:123389952-123395429 | 8.91E-05    | 9.12E-05    |
| Gm14548       | chr7:3835813-3849694     | 7.44E-05    | 2.49E-05    |
| Pira1         | chr7:3788416-3867086     | 4.65E-05    | 3.08E-100   |
| Pira7         | chr7:3789723-3849722     | 4.56E-05    | 3.72E-08    |
| Gm5512        | chr10:5917374-5943370    | 4.29E-05    | 8.323226667 |
| DXBay18       | chrX:70362385-70374599   | 1.31E-05    | 3.36E-05    |
| DXBay18       | chrX:70382570-70394789   | 1.29E-05    | 3.37E-05    |
| Gm3020        | chr14:6973740-6991301    | 3.73E-06    | 5.58E-08    |
| Gm12669       | chr7:144629356-144659663 | 1.33E-06    | 5.785526825 |
| Tmem181d-ps   | chr17:6635807-6644102    | 1.29E-06    | 2.63E-07    |
| Pilra         | chr5:138263179-138277506 | 9.58E-07    | 0.025809201 |
| Hist1h2ao     | chr13:21924930-21925444  | 8.97E-07    | 4.658683    |
| Gm3020        | chr14:3518337-3535897    | 8.69E-07    | 6.11E-08    |
| Hist1h2ao     | chr13:21902235-21902749  | 7.03E-07    | 4.580341    |
| Ng23          | chr17:35162919-35164961  | 3.08E-07    | 0.201431667 |
| Gm13272       | chr4:88425753-88426564   | 2.91E-07    | 1.48E-07    |



|               |                           |          |             |
|---------------|---------------------------|----------|-------------|
| Tmem181d-ps   | chr17:6817348-6825643     | 2.81E-07 | 1.31E-06    |
| D4Ert617e     | chr4:118299008-118304520  | 7.93E-08 | 0.978056667 |
| Ugt1a9        | chr1:89967353-90116577    | 7.75E-08 | 3.53E-09    |
| LOC547349     | chr17:35402723-35462354   | 6.66E-08 | 3.35E-08    |
| Ugt1a1        | chr1:90108533-90116577    | 5.30E-08 | 0.398920003 |
| Gm14435       | chr2:175790738-175800164  | 3.98E-08 | 0.161130801 |
| Gm14435       | chr2:175100630-175110056  | 3.88E-08 | 0.240886493 |
| Ugt1a10       | chr1:89951985-90116577    | 3.63E-08 | 2.75E-09    |
| Gm14435       | chr2:176320431-176329857  | 2.39E-08 | 0.188152959 |
| AB099516      | chr15:100183630-100214866 | 1.22E-08 | 1.85E-10    |
| Pcdha3        | chr18:37105860-37347311   | 9.53E-09 | 0.085235    |
| BC024582      | chr4:32646654-32658637    | 9.02E-09 | 0           |
| Fam151a       | chr4:106406519-106420897  | 8.27E-09 | 3.75E-08    |
| Pcdha10       | chr18:37164973-37347311   | 8.17E-09 | 0.0381869   |
| Pcdha1        | chr18:37089938-37347311   | 7.57E-09 | 0.04470461  |
| Pcdha12       | chr18:37179883-37347311   | 7.01E-09 | 0.430450016 |
| Pcdha11       | chr18:37170511-37347311   | 7.01E-09 | 0.074688967 |
| D830015G02Rik | chr14:55587623-55593186   | 6.72E-09 | 0           |
| E130218I03Rik | chr4:133799677-133801788  | 5.57E-09 | 7.98E-07    |
| Pcdhac1       | chr18:37249789-37347311   | 4.10E-09 | 0.011170142 |
| Pcdha4        | chr18:37112342-37347311   | 2.95E-09 | 2.12E-07    |
| Tmem150b      | chr7:4658433-4676853      | 2.38E-09 | 1.381096    |
| Pcdha2        | chr18:37098858-37347314   | 1.67E-09 | 0.788416667 |
| 9530052E02Rik | chr8:11007849-11054541    | 1.22E-09 | 4.76E-11    |
| E330033L03    | chr9:57880080-57896804    | 1.01E-09 | 2.33E-45    |
| Pcdhac2       | chr18:37303622-37347311   | 8.54E-10 | 0.235905002 |
| Gm16548       | chr1:166078706-166082348  | 1.70E-10 | 0.16343     |
| BC090627      | chr15:89246835-89260358   | 1.54E-10 | 0.514586778 |
| Lctl          | chr9:63964953-63985925    | 6.61E-11 | 1.31E-07    |
| Gm6537        | chr7:29541192-29543983    | 5.90E-11 | 0           |
| Gpr17         | chr18:32102652-32109290   | 2.57E-11 | 0           |
| Gm15350       | chr8:12828337-12831919    | 2.36E-11 | 0.184757    |
| Gm10390       | chr5:120571104-120589272  | 2.17E-11 | 0.2167516   |
| 8030443G20Rik | chr4:108615447-108644682  | 1.69E-11 | 9.23E-10    |
| Gm10432       | chr12:101514818-101539118 | 1.33E-11 | 0.848623    |
| Gm10684       | chr9:44915258-44943689    | 6.37E-12 | 0           |
| Apoo-ps       | chrX:91612462-91643541    | 5.90E-12 | 5.88E-07    |
| Insl3         | chr8:74213150-74214476    | 2.54E-12 | 0           |
| 0610039K10Rik | chr2:163470585-163471536  | 2.08E-12 | 0.152382667 |
| Pcdha4-g      | chr18:37112394-37999854   | 1.06E-12 | 0.138685233 |
| 1700001C19Rik | chr17:47549682-47574324   | 2.12E-13 | 0.019940033 |
| 0610040F04Rik | chr6:108527032-108610928  | 1.23E-13 | 7.20E-13    |
| Gm2506        | chr4:42028814-42029569    | 7.98E-14 | 0.691006333 |
| Gm13306       | chr4:42668782-42669537    | 5.11E-14 | 0.070343    |
| Gm16793       | chr8:36645556-36652074    | 3.17E-14 | 0.0193244   |
| 4922505G16Rik | chr2:157034285-157105285  | 6.53E-15 | 0.34051     |
| lqcj-schip1   | chr3:67696141-68430404    | 5.72E-20 | 9.92E-17    |
| Tnfsf13       | chr11:69496078-69499056   | 2.53E-34 | 1.59476     |
| 9930021D14Rik | chr17:24610828-24612414   | 3.67E-53 | 0.290306667 |
| Gm6793        | chr2:75497346-75503813    | 3.31E-58 | 1.675466013 |
| 1500017E21Rik | chr19:36693907-36763969   | 4.64E-65 | 0.95583     |
| 4930592A05Rik | chr15:33523635-33583191   | 6.45E-96 | 6.50E-105   |

|               |                          |           |             |
|---------------|--------------------------|-----------|-------------|
| 4833422C13Rik | chr13:91841269-91881477  | 1.49E-182 | 2.483651    |
| Gm11149       | chr9:49326392-49376130   | 6.72E-183 | 2.04E-69    |
| Mir1962       | chr7:142757844-142757965 | 0         | 90.382      |
| Snord15b      | chr7:106628072-106628217 | 0         | 88.4732     |
| Mir1961       | chr5:93217476-93217588   | 0         | 60.5421     |
| Mir1b         | chr18:10785443-10785565  | 0         | 53.05       |
| Fam183b       | chr11:58606303-58615462  | 0         | 51.83339667 |
| Rnu11         | chr4:131825993-131826101 | 0         | 44.734      |
| Mir695        | chr2:155182552-155182661 | 0         | 41.29866667 |
| Mir1966       | chr8:108139365-108139473 | 0         | 37.34566667 |
| Mir210        | chr7:148407282-148407392 | 0         | 31.9147     |
| Snora17       | chr2:26494709-26494841   | 0         | 27.2567     |
| Snora52       | chr7:148634701-148634835 | 0         | 24.69393333 |
| Snora69       | chrX:34622906-34623028   | 0         | 17.68336667 |
| Mir467f       | chr11:69448901-69449021  | 0         | 16.5197     |
| Mir466i       | chr13:17839306-17839427  | 0         | 15.60633333 |
| 1190002F15Rik | chr6:134879109-134901736 | 0         | 13.3983     |
| Snora62       | chr9:120039551-120039679 | 0         | 12.97923333 |
| 1700027A23Rik | chr3:105799874-105817564 | 0         | 9.831956667 |
| Stfa2         | chr16:36404031-36408449  | 0         | 9.406       |
| Snora16a      | chr4:131865379-131865515 | 0         | 9.053533333 |
| Gm10941       | chr10:76720517-76721968  | 0         | 8.581886667 |
| Apoa1         | chr9:46036712-46038549   | 0         | 8.130866667 |
| Cacng7        | chr7:3336684-3366537     | 0         | 7.637       |
| Gm757         | chr2:25089995-25092307   | 0         | 7.109801333 |
| Hp            | chr8:112099027-112103072 | 0         | 6.8546      |
| Gm6938        | chrX:20889335-20911853   | 0         | 6.549136667 |
| Sntn          | chr14:14503389-14515662  | 0         | 6.353733333 |
| Cml1          | chr6:85860147-85865671   | 0         | 5.90693     |
| Chodl         | chr16:78931192-78951973  | 0         | 5.76293     |
| Lsamp         | chr16:41533454-42146326  | 0         | 5.655053333 |
| Ang           | chr14:51710751-51721684  | 0         | 5.556917    |
| 1700125H03Rik | chr8:70892357-70899609   | 0         | 5.506696667 |
| Olfr90        | chr17:37222135-37223181  | 0         | 5.344277667 |
| Nr0b2         | chr4:133109304-133112451 | 0         | 5.309646667 |
| Agr3          | chr12:36652207-36676317  | 0         | 5.264006667 |
| Lhb           | chr7:52676315-52677224   | 0         | 5.219027    |
| Cited1        | chrX:99442775-99447108   | 0         | 4.985146667 |
| Adamts2       | chr11:50415586-50617551  | 0         | 4.778040333 |
| 4932443I19Rik | chr8:13705888-13743066   | 0         | 4.5266      |
| Sprr2k        | chr3:92236503-92237849   | 0         | 4.472166667 |
| Zp1           | chr19:10988786-10995091  | 0         | 4.470379667 |
| Cd177         | chr7:25529001-25545330   | 0         | 4.4411      |
| Lrrtm1        | chr6:77192710-77195511   | 0         | 4.384996667 |
| Rmst          | chr10:91544490-91627923  | 0         | 4.25662     |
| Necab3        | chr2:154370140-154384589 | 0         | 3.939456    |
| Morn5         | chr2:35904992-35935229   | 0         | 3.921933333 |
| 2210415F13Rik | chr11:58192533-58204043  | 0         | 3.8782      |
| Crif1         | chr8:73017054-73027980   | 0         | 3.866686667 |
| Calcb         | chr7:121862156-121866879 | 0         | 3.777506667 |
| C4bp          | chr1:132532497-132558195 | 0         | 3.724256    |
| 1600015I10Rik | chr6:48879894-48883686   | 0         | 3.704776    |

|               |                           |   |             |
|---------------|---------------------------|---|-------------|
| Lypd1         | chr1:127768618-127808791  | 0 | 3.689625333 |
| Speer2        | chr16:69857118-69863989   | 0 | 3.654323667 |
| Rtn1          | chr12:73312738-73509926   | 0 | 3.395036667 |
| Akr1c18       | chr13:4131872-4149877     | 0 | 3.380497667 |
| 2610028H24Rik | chr10:75911825-75923963   | 0 | 3.366000083 |
| 1700003M02Rik | chr4:34658580-34677455    | 0 | 3.31942     |
| Dppa5a        | chr9:78214860-78216006    | 0 | 3.27628     |
| Uts2          | chr4:150371205-150375919  | 0 | 3.26799     |
| Gm1574        | chr13:46369089-46395484   | 0 | 3.216326667 |
| Tmem212       | chr3:27764986-27795290    | 0 | 3.080828667 |
| Zfp474        | chr18:52775568-52799484   | 0 | 3.02064     |
| Stoml3        | chr3:53292714-53311574    | 0 | 3.006833333 |
| 4922505E12Rik | chr1:184677256-184679311  | 0 | 2.826073333 |
| Zcchc12       | chrX:33735898-33739153    | 0 | 2.784937733 |
| 4930479D17Rik | chr6:146605739-146613925  | 0 | 2.688472667 |
| Pcsk4         | chr10:79784027-79792218   | 0 | 2.678548333 |
| Ttc36         | chr9:44607482-44611034    | 0 | 2.60368     |
| Lgals1        | chr15:78757154-78760895   | 0 | 2.600846667 |
| 2410088K16Rik | chr1:90651464-90652308    | 0 | 2.536486667 |
| Olfr1372-ps1  | chr11:51968377-51971409   | 0 | 2.536136667 |
| Ucp3          | chr7:107621499-107634941  | 0 | 2.472533333 |
| Ugt3a1        | chr15:9209583-9244791     | 0 | 2.46458     |
| Vpreb3        | chr10:75411056-75412391   | 0 | 2.461886    |
| Ccl22         | chr8:97269583-97275288    | 0 | 2.403203333 |
| 1700003F12Rik | chr2:154374639-154375784  | 0 | 2.3809      |
| Klrb1c        | chr6:128728502-128738659  | 0 | 2.36388     |
| B3gnt3        | chr8:74215617-74225699    | 0 | 2.352787667 |
| Igfals        | chr17:25015714-25018953   | 0 | 2.3093      |
| Pilrb2        | chr5:138307056-138312986  | 0 | 2.266753    |
| Dcdc2a        | chr13:25147872-25302575   | 0 | 2.260300467 |
| Ccdc164       | chr5:30607913-30668993    | 0 | 2.208596667 |
| Iqgap3        | chr3:87885972-87924970    | 0 | 2.205340333 |
| Gm5820        | chr18:39052109-39130928   | 0 | 2.20273     |
| A430084P05Rik | chr11:70604433-70626063   | 0 | 2.193953333 |
| Ppp1r32       | chr19:10548746-10557387   | 0 | 2.18295     |
| Ccdc153       | chr9:44048759-44055389    | 0 | 2.180413333 |
| Mdk           | chr2:91769978-91772439    | 0 | 2.150183    |
| 1700016P04Rik | chr6:13363336-13365996    | 0 | 2.14082     |
| Pilrb1        | chr5:138293374-138299277  | 0 | 2.10629     |
| Cyp2c65       | chr19:39135495-39168438   | 0 | 2.097720333 |
| Spink2        | chr5:77634132-77640478    | 0 | 2.027196667 |
| Naip7         | chr13:101053069-101087643 | 0 | 2.017697901 |
| Ghrh          | chr2:157155231-157172391  | 0 | 1.97408     |
| Sult1b1       | chr5:87942363-87967220    | 0 | 1.958956667 |
| 5033406O09Rik | chr12:113180201-113182693 | 0 | 1.9489      |
| Hes2          | chr4:151532975-151536578  | 0 | 1.894438333 |
| Rad51ap2      | chr12:11462884-11469734   | 0 | 1.808796667 |
| Cdkl1         | chr12:70847834-70891694   | 0 | 1.79937     |
| Dhh           | chr15:98723457-98728971   | 0 | 1.767913667 |
| Slc39a4       | chr15:76442812-76447282   | 0 | 1.75198     |
| Gpx7          | chr4:108072821-108079318  | 0 | 1.739773333 |
| Cd5           | chr19:10792632-10813464   | 0 | 1.732291067 |

|               |                           |   |             |
|---------------|---------------------------|---|-------------|
| Pcsk1         | chr13:75227434-75269946   | 0 | 1.721214333 |
| 4933432I09Rik | chr16:18209778-18213956   | 0 | 1.715751433 |
| Gfra4         | chr2:130865911-130868824  | 0 | 1.714737667 |
| BC030476      | chr15:34383066-34403647   | 0 | 1.672513333 |
| Ttpa          | chr4:19935574-19957932    | 0 | 1.66185     |
| Rad51l1       | chr12:80398268-80915677   | 0 | 1.63245     |
| Olfr834       | chr9:18792433-18793372    | 0 | 1.61841     |
| Olfr1359      | chr13:21794871-21795813   | 0 | 1.60887     |
| Scarna13      | chr12:106269286-106269559 | 0 | 1.601616667 |
| Il2rg         | chrX:98459725-98463545    | 0 | 1.588141867 |
| Psg20         | chr7:19259714-19271341    | 0 | 1.568016667 |
| AU021092      | chr16:5211911-5222392     | 0 | 1.536053333 |
| Ccdc11        | chr18:74442753-74519638   | 0 | 1.524163333 |
| Gm12830       | chr4:114494324-114528771  | 0 | 1.5232      |
| St6galnac1    | chr11:116626338-116636821 | 0 | 1.497276667 |
| Lemd1         | chr1:134088012-134153959  | 0 | 1.479973333 |
| 4932411E22Rik | chr11:89251536-89280262   | 0 | 1.475603333 |
| Lix1l         | chr3:96405055-96429275    | 0 | 1.471240333 |
| Defb6         | chr8:19225477-19228209    | 0 | 1.465763333 |
| Ak8           | chr2:28555680-28668685    | 0 | 1.44556     |
| Lpar1         | chr4:58448123-58566363    | 0 | 1.44503     |
| 1810064F22Rik | chr9:22011229-22018304    | 0 | 1.44464     |
| Rdh1          | chr10:127196818-127205355 | 0 | 1.416753333 |
| 2310069B03Rik | chr6:82827859-82831847    | 0 | 1.409633333 |
| Amn           | chr12:112509321-112514637 | 0 | 1.408787    |
| Col6a1        | chr10:76171536-76188789   | 0 | 1.37944     |
| Dpysl4        | chr7:146271899-146287690  | 0 | 1.36405     |
| T             | chr17:8627287-8635361     | 0 | 1.319193333 |
| Tnfsf14       | chr17:57328914-57333609   | 0 | 1.303461667 |
| Gm11981       | chr11:6616003-6620040     | 0 | 1.299713333 |
| Cdc7          | chr5:107393340-107413450  | 0 | 1.282369667 |
| Ky            | chr9:102408467-102448569  | 0 | 1.276644667 |
| 2310015B20Rik | chr10:69667414-69682459   | 0 | 1.268999667 |
| Slc39a5       | chr10:127832987-127838280 | 0 | 1.2634686   |
| Mustn1        | chr14:31692442-31694796   | 0 | 1.259186467 |
| C030019I05Rik | chr11:46049058-46053373   | 0 | 1.250656967 |
| D430019H16Rik | chr12:106692065-106731305 | 0 | 1.1980651   |
| AI507597      | chr4:141170284-141171519  | 0 | 1.197946667 |
| Camk1g        | chr1:195172539-195196476  | 0 | 1.197286733 |
| 1700024G13Rik | chr14:33189687-33201559   | 0 | 1.19633     |
| 9330162B11Rik | chr1:189830454-189832869  | 0 | 1.19299     |
| Csn2          | chr5:88121648-88128446    | 0 | 1.172926667 |
| 2700046A07Rik | chr18:62911327-62916001   | 0 | 1.151653867 |
| 5430437J10Rik | chr15:5446317-5544983     | 0 | 1.14585     |
| Nusap1        | chr2:119444033-119475896  | 0 | 1.14176     |
| Hecw2         | chr1:53863717-54251878    | 0 | 1.129916547 |
| Acot4         | chr12:85379328-85385673   | 0 | 1.12924     |
| Tekt1         | chr11:72158221-72175382   | 0 | 1.1272      |
| Atp1a3        | chr7:25763187-25790914    | 0 | 1.114213333 |
| 0610031O16Rik | chr3:137873680-137902627  | 0 | 1.109626667 |
| Slc29a2       | chr19:5024005-5031972     | 0 | 1.09203     |
| Ankfn1        | chr11:89282399-89399869   | 0 | 1.06996     |

|               |                           |   |             |
|---------------|---------------------------|---|-------------|
| Slc2a10       | chr2:165329477-165345411  | 0 | 1.067       |
| Rtdr1         | chr10:74420221-74495331   | 0 | 1.06452     |
| Trim43a       | chr9:88475873-88483657    | 0 | 1.051358933 |
| Fam92b        | chr8:122690296-122701369  | 0 | 1.049879    |
| Guca2a        | chr4:119310336-119312070  | 0 | 1.04388     |
| Clvs1         | chr4:9196463-9378838      | 0 | 1.03365     |
| Ly6g5b        | chr17:35250889-35252345   | 0 | 1.03206     |
| Syn2          | chr6:115084919-115232644  | 0 | 1.030757    |
| Grid2         | chr6:63206850-64616273    | 0 | 1.029943333 |
| Lta           | chr17:35340109-35342296   | 0 | 1.02959     |
| Aspa          | chr11:73118489-73138136   | 0 | 1.0182      |
| Grm6          | chr11:50664186-50679710   | 0 | 0.996404    |
| Dnaic2        | chr11:114588725-114619200 | 0 | 0.991996667 |
| Nlgn3         | chrX:98494517-98516689    | 0 | 0.976938667 |
| Rapgef3       | chr15:97575200-97598097   | 0 | 0.976433333 |
| 4930509E16Rik | chr9:72366056-72379665    | 0 | 0.97348     |
| Erc61         | chrX:99338158-99352430    | 0 | 0.970255    |
| Serpine1      | chr5:137537375-137548142  | 0 | 0.96868     |
| Igfbp6        | chr15:101974616-101979943 | 0 | 0.96659     |
| Bpifa5        | chr2:153988342-153994182  | 0 | 0.963046667 |
| Rgs4          | chr1:171671607-171677773  | 0 | 0.96072     |
| Apoa2         | chr1:173155184-173156510  | 0 | 0.95893     |
| Mdh1b         | chr1:63745400-63776892    | 0 | 0.95424     |
| Gpr161        | chr1:167225896-167251982  | 0 | 0.949524    |
| 1700011A15Rik | chr15:101278175-101284340 | 0 | 0.947058667 |
| Gm5868        | chr5:72972877-72978789    | 0 | 0.94639     |
| Amh           | chr10:80267992-80270393   | 0 | 0.94581     |
| Cd40lg        | chrX:54465319-54477219    | 0 | 0.945243333 |
| Wnt6          | chr1:74818465-74831893    | 0 | 0.929280333 |
| Olfr1359      | chr13:21765869-21766811   | 0 | 0.92189     |
| Folr1         | chr7:109006844-109019302  | 0 | 0.92115     |
| Chst3         | chr10:59644275-59682008   | 0 | 0.919976667 |
| Scx           | chr15:76287867-76289898   | 0 | 0.902677333 |
| 1700026L06Rik | chr2:28547599-28555171    | 0 | 0.900882333 |
| Olfml2a       | chr2:38787499-38816105    | 0 | 0.883147    |
| Klrb1f        | chr6:128995918-129007489  | 0 | 0.878186667 |
| C030034L19Rik | chr3:9403077-9413903      | 0 | 0.8671862   |
| AU021034      | chr14:78480830-78488814   | 0 | 0.858553333 |
| Thnsl2        | chr6:71078391-71094370    | 0 | 0.853119667 |
| 1700047M11Rik | chr1:184230964-184233420  | 0 | 0.849756667 |
| 4930528F23Rik | chr17:24941326-24976732   | 0 | 0.846486667 |
| Gm17384       | chr5:63205061-63279557    | 0 | 0.844873333 |
| Vnn1          | chr10:23614493-23625149   | 0 | 0.840186667 |
| Ppp1r14a      | chr7:30074338-30078409    | 0 | 0.839063333 |
| Efhd1         | chr1:89160938-89207366    | 0 | 0.82756     |
| Prap1         | chr7:147279294-147283102  | 0 | 0.827046667 |
| Myt1          | chr2:181498036-181562480  | 0 | 0.8258      |
| Aadac         | chr3:59835709-59844079    | 0 | 0.824736667 |
| Stxbp5l       | chr16:37107395-37385044   | 0 | 0.805203    |
| Hrasls        | chr16:29209780-29230616   | 0 | 0.80251     |
| Kcnn2         | chr18:45719807-45845537   | 0 | 0.796811667 |
| Dlx1          | chr2:71367501-71372037    | 0 | 0.796554433 |

|               |                           |   |             |
|---------------|---------------------------|---|-------------|
| Krtap4-16     | chr11:99711968-99712919   | 0 | 0.796093333 |
| Wfdc1         | chr8:122190264-122211920  | 0 | 0.790796667 |
| Arhgdig       | chr17:26336127-26338295   | 0 | 0.772071667 |
| Ltb           | chr17:35331451-35333250   | 0 | 0.769716667 |
| Spn           | chr7:134276977-134281331  | 0 | 0.764326667 |
| Has2          | chr15:56497181-56526101   | 0 | 0.756084333 |
| Rimkla        | chr4:119137890-119165203  | 0 | 0.754325333 |
| Fam113b       | chr15:97077537-97216122   | 0 | 0.752455333 |
| 9330179D12Rik | chr6:127099406-127162437  | 0 | 0.74903     |
| Car8          | chr4:8068639-8166188      | 0 | 0.74887     |
| Cyp2c66       | chr19:39188387-39261246   | 0 | 0.7445057   |
| Hoxa1         | chr6:52105365-52108316    | 0 | 0.744236667 |
| Defb3         | chr8:19293360-19295339    | 0 | 0.740236667 |
| Slc38a3       | chr9:107553485-107571299  | 0 | 0.723733333 |
| Trhr          | chr15:44027680-44067458   | 0 | 0.72346     |
| 4930523O13Rik | chr15:46267411-46327725   | 0 | 0.711213333 |
| Gm581         | chr7:52431718-52434967    | 0 | 0.705913    |
| Peg10         | chr6:4697305-4710516      | 0 | 0.7025059   |
| Pdgfrl        | chr8:42011586-42076124    | 0 | 0.700543333 |
| A330048O09Rik | chr13:48367786-48369253   | 0 | 0.699993333 |
| Itih1         | chr14:31742365-31756475   | 0 | 0.697773333 |
| Arhgef15      | chr11:68756655-68770360   | 0 | 0.695541    |
| Timeless      | chr10:127669118-127689997 | 0 | 0.694596    |
| Pon1          | chr6:5118089-5143946      | 0 | 0.689743333 |
| Cfh           | chr1:141982431-142079988  | 0 | 0.689363333 |
| Gal           | chr19:3409916-3414457     | 0 | 0.688256667 |
| Pnmal1        | chr7:17545143-17547669    | 0 | 0.687263333 |
| Utf1          | chr7:147129754-147131011  | 0 | 0.685875667 |
| 9530026P05Rik | chr6:92890575-93061743    | 0 | 0.685806667 |
| Epgn          | chr5:91456542-91464238    | 0 | 0.683833333 |
| 9130008F23Rik | chr17:41012430-41017507   | 0 | 0.683249    |
| Zfp641        | chr15:98116552-98126514   | 0 | 0.67992     |
| 1700029J03Rik | chr16:93397059-93459117   | 0 | 0.679306667 |
| Mfap5         | chr6:122463693-122479305  | 0 | 0.67404     |
| 5330413P13Rik | chr2:131645741-131673392  | 0 | 0.642443833 |
| Cryaa         | chr17:31814889-31818669   | 0 | 0.639683333 |
| Ccdc60        | chr5:116575589-116738994  | 0 | 0.633578233 |
| Zfp449        | chrX:53599576-53618851    | 0 | 0.631088    |
| 1700028I16Rik | chr10:82274867-82286987   | 0 | 0.630846667 |
| Ccdc121       | chr1:183439763-183441582  | 0 | 0.62836     |
| lp6k3         | chr17:27280915-27304709   | 0 | 0.620906033 |
| Wfdc13        | chr2:164510606-164513206  | 0 | 0.617696667 |
| Selp          | chr1:166045394-166080157  | 0 | 0.617013333 |
| Cacna1f       | chrX:7184228-7212322      | 0 | 0.60958     |
| Calb1         | chr4:15808410-15833856    | 0 | 0.608706667 |
| 1700008O03Rik | chr7:51615414-51630400    | 0 | 0.604450667 |
| Gtf2a1l       | chr17:89067999-89114490   | 0 | 0.597976667 |
| 4833427G06Rik | chr9:50889417-50910183    | 0 | 0.5967      |
| Pik3c2g       | chr6:139535771-139917804  | 0 | 0.591643333 |
| Mesp2         | chr7:86955612-86958317    | 0 | 0.5847      |
| Chrna2        | chr14:66759796-66771785   | 0 | 0.583594667 |
| Fsd1          | chr17:56125933-56136304   | 0 | 0.580823933 |

|               |                           |   |             |
|---------------|---------------------------|---|-------------|
| Btk           | chrX:131076879-131117679  | 0 | 0.579766667 |
| 1500002O10Rik | chr2:70327996-70401414    | 0 | 0.579213333 |
| Krtap2-4      | chr11:99475330-99476160   | 0 | 0.575930333 |
| Csnka2ip      | chr16:64477636-64478960   | 0 | 0.573806667 |
| Dkkl1         | chr7:52462894-52467253    | 0 | 0.572773    |
| Rfpl4         | chr7:5061388-5068513      | 0 | 0.571307    |
| Dio2          | chr12:91962991-91976878   | 0 | 0.562710333 |
| Irgc1         | chr7:25216944-25230701    | 0 | 0.560323333 |
| Gm4251        | chr14:71651079-71670866   | 0 | 0.559655667 |
| 1600029I14Rik | chr9:99370839-99375170    | 0 | 0.559096667 |
| Fhl3          | chr4:124377942-124385855  | 0 | 0.548199667 |
| Myrip         | chr9:120213190-120383952  | 0 | 0.546803333 |
| Sstr1         | chr12:59312790-59317023   | 0 | 0.54489     |
| Al662270      | chr11:83037077-83040086   | 0 | 0.539216667 |
| Actg2         | chr6:83462902-83486245    | 0 | 0.533773333 |
| Sec14l2       | chr11:3997042-4018732     | 0 | 0.5272608   |
| 1700108J01Rik | chr14:122629126-122632860 | 0 | 0.522106667 |
| 4833417C18Rik | chr11:95720130-95722360   | 0 | 0.5115333   |
| C2            | chr17:34999546-35019045   | 0 | 0.50765     |
| Tyms-ps       | chr10:87429415-87430762   | 0 | 0.506251333 |
| 4931408D14Rik | chr19:37332918-37338585   | 0 | 0.503890267 |
| Depdc1b       | chr13:109106530-109179751 | 0 | 0.5026823   |
| Igfbpl1       | chr4:45822378-45839699    | 0 | 0.501666667 |
| Gabra1        | chr11:41944981-41996432   | 0 | 0.501362967 |
| 2900055J20Rik | chr18:40416615-40417341   | 0 | 0.500822    |
| Cdc25c        | chr18:34892650-34911187   | 0 | 0.499032    |
| Fam40b        | chr6:29867012-29909680    | 0 | 0.49537     |
| Gm10024       | chr10:77174201-77174754   | 0 | 0.490746667 |
| Oas1f         | chr5:121297375-121307995  | 0 | 0.489395667 |
| Flt3          | chr5:148142316-148212065  | 0 | 0.488793333 |
| Fam81a        | chr9:69937116-69989364    | 0 | 0.4886839   |
| Krt82         | chr15:101371655-101381090 | 0 | 0.482926667 |
| Gchfr         | chr2:118993523-118998125  | 0 | 0.482723    |
| Grm4          | chr17:27559332-27640249   | 0 | 0.482173667 |
| AU021063      | chr15:101051677-101052586 | 0 | 0.475768667 |
| 4933404M02Rik | chr2:70346875-70378941    | 0 | 0.47446     |
| Scn8a         | chr15:100701113-100876360 | 0 | 0.473621367 |
| Dupd1         | chr14:22495793-22533798   | 0 | 0.471133    |
| Hepacam       | chr9:37175190-37194156    | 0 | 0.468353333 |
| Impa2         | chr18:67448876-67478495   | 0 | 0.467690667 |
| Mafa          | chr15:75577272-75578352   | 0 | 0.464083333 |
| Nmnat2        | chr1:154802230-154966391  | 0 | 0.460126667 |
| 1700001G11Rik | chr14:66914165-66915966   | 0 | 0.45233     |
| 4930451C15Rik | chr16:17544557-17561340   | 0 | 0.45224     |
| Il7r          | chr15:9435913-9459631     | 0 | 0.449303333 |
| Fkbp11        | chr15:98554798-98558629   | 0 | 0.44787     |
| Ctrb1         | chr8:114210409-114214910  | 0 | 0.447336667 |
| Tcea3         | chr4:135803871-135830814  | 0 | 0.433363333 |
| Tmem117       | chr15:94459615-94926528   | 0 | 0.431992333 |
| Cacna2d1      | chr5:15440508-15880329    | 0 | 0.430396    |
| Tslp          | chr18:32975036-32979453   | 0 | 0.428566667 |
| Irf4          | chr13:30841126-30858796   | 0 | 0.42689     |

|               |                           |   |             |
|---------------|---------------------------|---|-------------|
| Zfp57         | chr17:37138107-37147674   | 0 | 0.42544     |
| Rnf112        | chr11:61261943-61267388   | 0 | 0.418893    |
| BC027072      | chr17:72092894-72102225   | 0 | 0.415377    |
| Cpn1          | chr19:44030797-44061010   | 0 | 0.415014    |
| Oxct2b        | chr4:122793490-122795243  | 0 | 0.414437367 |
| 1810008118Rik | chr7:72948937-72951109    | 0 | 0.408903333 |
| Trpc6         | chr9:8544141-8680741      | 0 | 0.405243333 |
| Gpr34         | chrX:13209894-13217984    | 0 | 0.399296667 |
| Kcnk12        | chr17:88145160-88197334   | 0 | 0.397325333 |
| 9230115E21Rik | chr9:51647597-51683990    | 0 | 0.3961      |
| Ramp1         | chr1:93076398-93121773    | 0 | 0.389363333 |
| Tff2          | chr17:31278006-31281227   | 0 | 0.389246667 |
| Tmem169       | chr1:72330946-72349569    | 0 | 0.38808     |
| Tpsg1         | chr17:25507497-25511387   | 0 | 0.383236667 |
| 4930564G21Rik | chr10:119183117-119198755 | 0 | 0.382787333 |
| 1500015O10Rik | chr1:43787446-43799409    | 0 | 0.382402    |
| Sgk2          | chr2:162813216-162839863  | 0 | 0.375691267 |
| Gm12695       | chr4:96390577-96451851    | 0 | 0.373676667 |
| Prr19         | chr7:26086377-26089152    | 0 | 0.372783333 |
| AA387883      | chr19:52997670-53001421   | 0 | 0.363246667 |
| Mtnr1a        | chr8:46154563-46173860    | 0 | 0.36216     |
| Tex12         | chr9:50365252-50369373    | 0 | 0.361051333 |
| Olfr239       | chr17:33336006-33336954   | 0 | 0.360586667 |
| Dazl          | chr17:50418718-50432924   | 0 | 0.35976     |
| Zbtb32        | chr7:31374699-31377961    | 0 | 0.358323    |
| Lrrc18        | chr14:33804567-33828478   | 0 | 0.354276667 |
| Kcnd3         | chr3:105255247-105476920  | 0 | 0.354028333 |
| Syce1         | chr7:147963127-147973753  | 0 | 0.34932     |
| T2            | chr17:8565260-8615591     | 0 | 0.348438667 |
| Gm4461        | chr17:33352205-33353296   | 0 | 0.347946667 |
| Slc7a15       | chr12:8535288-8605872     | 0 | 0.34793     |
| Chst9         | chr18:15610683-15876555   | 0 | 0.3435359   |
| Tube1         | chr10:38853828-38870864   | 0 | 0.342644    |
| Pmch          | chr10:87553816-87555119   | 0 | 0.341787667 |
| Gm13582       | chr2:60802432-60813208    | 0 | 0.341580667 |
| Lax1          | chr1:135575605-135586685  | 0 | 0.340906667 |
| Dlx1as        | chr2:71368694-71375948    | 0 | 0.33859     |
| Gpr97         | chr8:97541591-97569149    | 0 | 0.332156333 |
| Gnat1         | chr9:107576804-107581923  | 0 | 0.331620333 |
| Tlr9          | chr9:106124928-106129207  | 0 | 0.330076333 |
| Neil3         | chr8:54672220-54724419    | 0 | 0.329308    |
| Olfr543       | chr7:109625286-109626416  | 0 | 0.329139333 |
| Slc45a3       | chr1:133859543-133879541  | 0 | 0.328774    |
| Tctex1d4      | chr4:116799417-116801335  | 0 | 0.327477333 |
| Gm19589       | chr1:90448091-90458741    | 0 | 0.326351667 |
| Tmem200b      | chr4:131477685-131479055  | 0 | 0.324079    |
| Nanos3        | chr8:86697631-86700451    | 0 | 0.323600667 |
| Ctnna2        | chr6:76831630-77929661    | 0 | 0.323500333 |
| Gm4951        | chr18:60371730-60407474   | 0 | 0.322519333 |
| Kcnq2         | chr2:180810283-180869930  | 0 | 0.320988    |
| Csf3          | chr11:98562626-98564943   | 0 | 0.320964667 |
| Il15          | chr8:84855522-84926485    | 0 | 0.319848667 |



|               |                           |   |             |
|---------------|---------------------------|---|-------------|
| Prr5l         | chr2:101554441-101679137  | 0 | 0.318309133 |
| Crispld2      | chr8:122516369-122576693  | 0 | 0.315020667 |
| Sprr2h        | chr3:92189606-92191241    | 0 | 0.313915333 |
| C1rl          | chr6:124443130-124460661  | 0 | 0.3083787   |
| Scara3        | chr14:66538231-66572581   | 0 | 0.307620333 |
| A630095N17Rik | chr1:75216669-75228668    | 0 | 0.307382    |
| Srrm3         | chr5:136293975-136350642  | 0 | 0.307264333 |
| Pfn4          | chr12:4776100-4785072     | 0 | 0.306965667 |
| Bmp5          | chr9:75623171-75746824    | 0 | 0.304746333 |
| Cdh26         | chr2:178165311-178222071  | 0 | 0.303757667 |
| Il20ra        | chr10:19432392-19479859   | 0 | 0.299077    |
| Tomm20l       | chr12:72212414-72224209   | 0 | 0.296234    |
| Prrm1         | chr16:10796424-10796916   | 0 | 0.295946667 |
| 1700120C14Rik | chr15:99082218-99092472   | 0 | 0.292575333 |
| Bmp8b         | chr4:122782407-122803334  | 0 | 0.290931367 |
| Gm6484        | chr9:21639953-21641791    | 0 | 0.289288667 |
| Gm5544        | chr3:97734095-97770941    | 0 | 0.288756    |
| Pklr          | chr3:88940063-88950516    | 0 | 0.286934    |
| Naip5         | chr13:100981694-101017291 | 0 | 0.284300667 |
| Trim43c       | chr9:88734001-88743028    | 0 | 0.284172    |
| Tnfsf4        | chr1:163325568-163348337  | 0 | 0.281050667 |
| 2010009K17Rik | chr2:157896099-157917533  | 0 | 0.280531667 |
| Mfsd7a        | chr5:108870072-108877910  | 0 | 0.278123    |
| Nxph1         | chr6:8900018-9198578      | 0 | 0.27802     |
| Tnni1         | chr1:137695997-137707566  | 0 | 0.274241333 |
| Galr2         | chr11:116142252-116145252 | 0 | 0.274112667 |
| Stag3         | chr5:138721736-138753621  | 0 | 0.272485333 |
| Il31ra        | chr13:113313015-113370870 | 0 | 0.272440333 |
| Ephb1         | chr9:101824457-102257023  | 0 | 0.272285667 |
| Gjd3          | chr11:98843493-98844330   | 0 | 0.268832667 |
| E130201H02Rik | chr7:127741138-127741989  | 0 | 0.267746    |
| Rp1           | chr1:4280926-4399322      | 0 | 0.267652    |
| Gm15217       | chr14:46999198-47003281   | 0 | 0.266186    |
| Jakmip3       | chr7:146132432-146269875  | 0 | 0.265276333 |
| St6galnac6    | chr2:32455228-32476324    | 0 | 0.264895    |
| 1700125H20Rik | chr11:84984597-84994656   | 0 | 0.263904    |
| Gm14827       | chrX:91688070-91693066    | 0 | 0.263357    |
| Cela1         | chr15:100504852-100518351 | 0 | 0.263195667 |
| Rpp25         | chr9:57351908-57353254    | 0 | 0.262325    |
| Dusp27        | chr1:168028278-168058029  | 0 | 0.258865333 |
| Parvb         | chr15:84062472-84146039   | 0 | 0.2586982   |
| 2610021K21Rik | chr12:100955740-101121652 | 0 | 0.256814    |
| Fgf18         | chr11:33017430-33047400   | 0 | 0.256812667 |
| Tinag         | chr9:76799504-76893588    | 0 | 0.255753    |
| Cd207         | chr6:83621200-83627851    | 0 | 0.255321667 |
| St6galnac4    | chr2:32443009-32455994    | 0 | 0.253922533 |
| Wdr38         | chr2:38853828-38857104    | 0 | 0.253803667 |
| Tmem91        | chr7:26454158-26460185    | 0 | 0.253082333 |
| 1700031A10Rik | chr17:37060736-37070377   | 0 | 0.252008    |
| Cd300e        | chr11:114913230-114923352 | 0 | 0.251476    |
| Slc46a1       | chr11:78279202-78285447   | 0 | 0.251233    |
| Poln          | chr5:34349846-34512097    | 0 | 0.250372667 |

|               |                           |   |             |
|---------------|---------------------------|---|-------------|
| Ctse          | chr1:133534890-133572084  | 0 | 0.249955667 |
| Kcne2         | chr16:92292633-92298378   | 0 | 0.249359333 |
| 4933429K18Rik | chr19:45801044-45805048   | 0 | 0.244259    |
| Uox           | chr3:146260112-146294447  | 0 | 0.240769667 |
| Pabpn1l       | chr8:125143370-125146635  | 0 | 0.240584333 |
| 1700061J05Rik | chr15:78208829-78226342   | 0 | 0.239847    |
| Armcx6        | chrX:131282993-131285958  | 0 | 0.239755    |
| Insc          | chr7:121889279-121993894  | 0 | 0.239024    |
| Tcte1         | chr17:45660382-45679626   | 0 | 0.237601    |
| Noxa1         | chr2:24941189-24950725    | 0 | 0.235855667 |
| D830046C22Rik | chr5:139853650-139856007  | 0 | 0.235439667 |
| Serpib3d      | chr1:108974769-108980057  | 0 | 0.235261333 |
| Foxn4         | chr5:114704172-114723770  | 0 | 0.234014667 |
| Catsper3      | chr13:55885939-55910361   | 0 | 0.231933667 |
| Olfr55        | chr17:33313360-33314308   | 0 | 0.230776    |
| AI848285      | chr15:82037381-82043245   | 0 | 0.229043    |
| 2210416O15Rik | chr11:87911559-87913609   | 0 | 0.228492767 |
| C1ql1         | chr11:102800577-102807775 | 0 | 0.227324333 |
| Ctrc          | chr4:141394154-141402274  | 0 | 0.225628    |
| Pgr           | chr9:8899832-8968611      | 0 | 0.224807    |
| Hhipl1        | chr12:109544479-109566510 | 0 | 0.224721667 |
| Trim43b       | chr9:88979461-88987673    | 0 | 0.224515567 |
| Adamts15      | chr9:30706739-30730037    | 0 | 0.224006833 |
| 1700001C02Rik | chr5:30768449-30786460    | 0 | 0.223877333 |
| Trpv5         | chr6:41602768-41630722    | 0 | 0.223248333 |
| E330013P06    | chr18:61805531-61825192   | 0 | 0.222693    |
| Lgals2        | chr15:78681289-78685959   | 0 | 0.220698667 |
| Hpn           | chr7:31883743-31900309    | 0 | 0.217833    |
| Atf7ip2       | chr16:10192998-10243144   | 0 | 0.217761333 |
| Gm933         | chr16:32804973-32810532   | 0 | 0.217217333 |
| Actl7a        | chr4:56756293-56757797    | 0 | 0.217044    |
| Nobox         | chr6:43253672-43259553    | 0 | 0.216928333 |
| Naip6         | chr13:101051075-101086571 | 0 | 0.216894093 |
| 2410007B07Rik | chr3:75451362-75459653    | 0 | 0.215789667 |
| Bbox1         | chr2:110105239-110145882  | 0 | 0.212816067 |
| Adamtsl5      | chr10:79803460-79811191   | 0 | 0.210906    |
| 4930417O13Rik | chr6:125215542-125223795  | 0 | 0.209744    |
| Gm101         | chr1:121820095-121891787  | 0 | 0.207475667 |
| Lrch2         | chrX:143906236-143988624  | 0 | 0.20739     |
| Samsn1        | chr16:75859038-75909511   | 0 | 0.206121333 |
| 1700029H14Rik | chr8:13550732-13562448    | 0 | 0.204733667 |
| Serpinf2      | chr11:75245237-75253003   | 0 | 0.203667    |
| Ttc29         | chr8:80737240-80918225    | 0 | 0.200589667 |
| Vmn1r90       | chr7:15146590-15147520    | 0 | 0.199714667 |
| Efcab6        | chr15:83697141-83895779   | 0 | 0.199002667 |
| Osm           | chr11:4136787-4141029     | 0 | 0.198589333 |
| Cyp4a32       | chr4:115273542-115294971  | 0 | 0.197965667 |
| Ccdc147       | chr19:48012201-48109869   | 0 | 0.197062333 |
| Gpr110        | chr17:43407295-43461355   | 0 | 0.196074333 |
| Ribc2         | chr15:84962528-84974999   | 0 | 0.194762667 |
| Pcnx12        | chr8:128275407-128422193  | 0 | 0.194511    |
| Vmn1r48       | chr6:89985926-89986835    | 0 | 0.190357667 |

|               |                           |   |             |
|---------------|---------------------------|---|-------------|
| Sfrp2         | chr3:83570242-83578236    | 0 | 0.190138    |
| 4931430N09Rik | chr6:118830175-118835561  | 0 | 0.189176667 |
| Gm19395       | chr10:53000075-53003493   | 0 | 0.188161667 |
| Gm10046       | chr7:28550691-28555991    | 0 | 0.1874425   |
| Gm11570       | chr11:99846016-99847907   | 0 | 0.187078567 |
| BC100530      | chr16:36359467-36367656   | 0 | 0.184498667 |
| Gm4489        | chr10:121556752-121567614 | 0 | 0.181341    |
| Gm16677       | chr14:69947763-69955194   | 0 | 0.180757333 |
| Isl2          | chr9:55388955-55393985    | 0 | 0.179965867 |
| Gm10863       | chr15:78996495-79046831   | 0 | 0.179348    |
| Lrp2          | chr2:69262391-69424124    | 0 | 0.178565333 |
| Olfr315       | chr11:58591590-58592588   | 0 | 0.178236333 |
| Fmo4          | chr1:164724013-164742680  | 0 | 0.178086667 |
| Ascl4         | chr10:85391235-85392392   | 0 | 0.17764     |
| Sh3tc2        | chr18:62112728-62175373   | 0 | 0.177594333 |
| Dach2         | chrX:110411864-110949995  | 0 | 0.177204333 |
| Pou3f2        | chr4:22409241-22415513    | 0 | 0.176021    |
| Ces2c         | chr8:107370967-107378382  | 0 | 0.175622667 |
| Gm10104       | chr8:22204716-22205680    | 0 | 0.174502333 |
| 1700029J11Rik | chr2:172298053-172299816  | 0 | 0.173688333 |
| 1700126H18Rik | chr5:66557845-66582574    | 0 | 0.173605333 |
| Gm14850       | chr8:22675857-22676822    | 0 | 0.173605333 |
| Anxa10        | chr8:64536317-64601915    | 0 | 0.172781667 |
| Acot5         | chr12:85410274-85416969   | 0 | 0.171204667 |
| Fbxo15        | chr18:85104416-85150784   | 0 | 0.171141    |
| Gm4763        | chr7:25507512-25509309    | 0 | 0.170698    |
| Slc15a1       | chr14:121858842-121904476 | 0 | 0.169394867 |
| Evc           | chr5:37690409-37728120    | 0 | 0.166781433 |
| 4930502E09Rik | chr11:84642679-84644370   | 0 | 0.164851333 |
| 1700007P06Rik | chr1:188949016-188951731  | 0 | 0.164688    |
| 2810011L19Rik | chr12:106574803-106622142 | 0 | 0.164539667 |
| Akr1c14       | chr13:4058836-4089668     | 0 | 0.163343667 |
| Pabpc1l       | chr2:163851185-163876274  | 0 | 0.162362267 |
| Gm8439        | chr4:120261349-120282277  | 0 | 0.161163333 |
| Gm11201       | chr11:78837098-78848507   | 0 | 0.16113     |
| 1700034E13Rik | chr18:52805873-52823385   | 0 | 0.159592333 |
| Morc1         | chr16:48431349-48631018   | 0 | 0.158206667 |
| Foxi1         | chr11:34104340-34108089   | 0 | 0.157179333 |
| Gm1045        | chr5:92416498-92424343    | 0 | 0.155135    |
| 4930511M11Rik | chr5:3657003-3679544      | 0 | 0.15499     |
| 4930428E07Rik | chr12:39279395-39341108   | 0 | 0.154974333 |
| Cdhr2         | chr13:54802823-54838023   | 0 | 0.154570667 |
| Chrdl2        | chr7:107154913-107183236  | 0 | 0.154084667 |
| Trim69        | chr2:121986435-122004763  | 0 | 0.152121333 |
| Ccdc83        | chr7:97372387-97413942    | 0 | 0.151076667 |
| Hpcal4        | chr4:122860746-122871942  | 0 | 0.150399333 |
| Cd3d          | chr9:44789868-44795135    | 0 | 0.150193    |
| Pnck          | chrX:70901330-70905409    | 0 | 0.149894333 |
| Pfkfb1        | chrX:147024463-147078403  | 0 | 0.148693667 |
| Gm9758        | chr5:14910123-14914889    | 0 | 0.148614333 |
| Scgb1c1       | chr7:148031463-148032668  | 0 | 0.148376667 |
| Khdrbs2       | chr1:32229650-32714583    | 0 | 0.148203667 |

|               |                           |   |             |
|---------------|---------------------------|---|-------------|
| Tnxb          | chr17:34807479-34856760   | 0 | 0.147347    |
| Dydc2         | chr14:41862497-41882363   | 0 | 0.147132667 |
| 1700057K13Rik | chr1:159029278-159038776  | 0 | 0.146726667 |
| 4933424G05Rik | chr18:15147503-15206496   | 0 | 0.146368333 |
| Rsph6a        | chr7:19640035-19659796    | 0 | 0.146318667 |
| Hcst          | chr7:31202730-31204873    | 0 | 0.145174667 |
| A730090N16Rik | chr3:65127941-65153351    | 0 | 0.143663667 |
| Klk1b27       | chr7:51307659-51312081    | 0 | 0.142856    |
| Bmp8a         | chr4:122989890-123020495  | 0 | 0.142847333 |
| Gm17019       | chr5:15028949-15033007    | 0 | 0.142536333 |
| Gng8          | chr7:17477134-17480784    | 0 | 0.142178333 |
| Esr2          | chr12:77221405-77278246   | 0 | 0.142136    |
| Msx1          | chr5:38211729-38215824    | 0 | 0.140736    |
| Oxct2a        | chr4:122999117-123000922  | 0 | 0.138425333 |
| Tnnc1         | chr14:32021497-32024897   | 0 | 0.136534    |
| Clec10a       | chr11:69980124-69984338   | 0 | 0.136272333 |
| Syce1l        | chr8:116167112-116179433  | 0 | 0.136065667 |
| Prkcb         | chr7:129432638-129777915  | 0 | 0.135662667 |
| Hoxa7         | chr6:52165622-52168572    | 0 | 0.135254667 |
| C1qtnf2       | chr11:43287807-43305027   | 0 | 0.134443    |
| 4930471I20Rik | chr2:155372775-155382666  | 0 | 0.13413     |
| Speer4a       | chr5:26360809-26366045    | 0 | 0.131413333 |
| Zkscan16      | chr4:58956499-58971227    | 0 | 0.130177    |
| Lhfp15        | chr17:28712663-28720538   | 0 | 0.129774333 |
| Alpl          | chr4:137297646-137352292  | 0 | 0.12921     |
| Tmem145       | chr7:26091126-26101214    | 0 | 0.128884    |
| 4930448I18Rik | chr5:50542571-50547331    | 0 | 0.128697333 |
| 2010317E24Rik | chr2:25227840-25233733    | 0 | 0.125407333 |
| LOC171588     | chr2:144290911-144292468  | 0 | 0.125101333 |
| Usp51         | chrX:149441011-149444002  | 0 | 0.124078    |
| Pcsk1n        | chrX:7496947-7501536      | 0 | 0.1234007   |
| Il23r         | chr6:67372925-67441849    | 0 | 0.123277    |
| Gm16325       | chr3:146304895-146314679  | 0 | 0.123164667 |
| Dct           | chr14:118412011-118451468 | 0 | 0.123110667 |
| Fibcd1        | chr2:31668809-31701525    | 0 | 0.121848    |
| Card11        | chr5:141348952-141476550  | 0 | 0.1202796   |
| Icos          | chr1:61034757-61057164    | 0 | 0.119927333 |
| Chst4         | chr8:112552974-112563234  | 0 | 0.118902667 |
| Abcc2         | chr19:43856797-43912708   | 0 | 0.118626533 |
| Olfr1411      | chr1:94493097-94494069    | 0 | 0.117885333 |
| 2610318N02Rik | chr16:17113490-17125199   | 0 | 0.116914667 |
| Lama4         | chr10:38685320-38829994   | 0 | 0.116687667 |
| Il17b         | chr18:61847588-61852191   | 0 | 0.116586667 |
| Tnnc2         | chr2:164602661-164605234  | 0 | 0.116586667 |
| Fam47e        | chr5:93000562-93020310    | 0 | 0.115667667 |
| 9530036O11Rik | chr5:28793523-29045749    | 0 | 0.115513667 |
| C1ql3         | chr2:12923513-12932491    | 0 | 0.115311    |
| Ttc34         | chr4:154230308-154241236  | 0 | 0.112701667 |
| Mlana         | chr19:29772430-29782796   | 0 | 0.112011    |
| F10           | chr8:13037307-13056676    | 0 | 0.111972667 |
| Crisp1        | chr17:40430706-40456156   | 0 | 0.111584    |
| Apol6         | chr15:76875504-76887538   | 0 | 0.1106404   |

|               |                           |   |             |
|---------------|---------------------------|---|-------------|
| Kcnk4         | chr19:7000179-7009005     | 0 | 0.110297333 |
| S1pr3         | chr13:51503986-51518166   | 0 | 0.110016467 |
| Gm10640       | chr7:31947376-31955660    | 0 | 0.109238    |
| Speer4d       | chr5:15124916-15129682    | 0 | 0.10873     |
| E230019M04Rik | chrX:136597417-136641336  | 0 | 0.108104333 |
| Syne1         | chr10:4795848-5009592     | 0 | 0.107808    |
| Gm4776        | chr1:46077259-46087282    | 0 | 0.107765333 |
| Otoa          | chr7:128226951-128306603  | 0 | 0.107590333 |
| Ucn2          | chr9:108888207-108889209  | 0 | 0.107517333 |
| 4933411K16Rik | chr19:42126717-42128118   | 0 | 0.107232    |
| Rtn4rl2       | chr2:84712102-84726849    | 0 | 0.106693667 |
| Kcnmb1        | chr11:33863012-33873638   | 0 | 0.105885333 |
| Pramef6       | chr4:143484139-143490283  | 0 | 0.105378333 |
| Prss55        | chr14:64694279-64704226   | 0 | 0.104682333 |
| Stfa211       | chr16:36156896-36162034   | 0 | 0.104464667 |
| Sele          | chr1:165978364-165987808  | 0 | 0.10393     |
| D630003M21Rik | chr2:158008268-158054958  | 0 | 0.102953233 |
| Clnk          | chr5:39097698-39267932    | 0 | 0.102276333 |
| Fam159b       | chr13:105635362-105653973 | 0 | 0.102133667 |
| Txndc2        | chr17:65986844-65991544   | 0 | 0.1021131   |
| Panx3         | chr9:37467486-37476807    | 0 | 0.102022333 |
| Ebf2          | chr14:67852128-68048604   | 0 | 0.101938667 |
| Zp3           | chr5:136455974-136464494  | 0 | 0.101487667 |
| S100a9        | chr3:90496554-90499613    | 0 | 0.101119667 |
| Prdm8         | chr5:98609887-98616467    | 0 | 0.100353333 |
| Gm5084        | chr13:60306831-60317379   | 0 | 0.100326667 |
| Wnt16         | chr6:22238226-22248522    | 0 | 0.100261067 |
| Tram111       | chr3:124023954-124026178  | 0 | 0.100215333 |
| Zkscan2       | chr7:130622153-130643963  | 0 | 0.100176    |
| Clec4d        | chr6:123212124-123225286  | 0 | 0.100020667 |
| Mecom         | chr3:29850217-29912126    | 0 | 0.099955333 |
| Nlrp9c        | chr7:27149905-27179262    | 0 | 0.099935    |
| Wnt3a         | chr11:59061543-59104253   | 0 | 0.099464333 |
| Cpne9         | chr6:113232300-113255565  | 0 | 0.098723933 |
| Vmn1r4        | chr6:56906506-56907400    | 0 | 0.09839     |
| Aanat         | chr11:116455000-116458994 | 0 | 0.098289667 |
| Htr3a         | chr9:48707317-48719204    | 0 | 0.096714333 |
| 4930486L24Rik | chr13:60943972-60965777   | 0 | 0.096599667 |
| Gm14164       | chr2:152171404-152201058  | 0 | 0.095282    |
| Rbm20         | chr19:53751795-53941570   | 0 | 0.094865667 |
| Trim67        | chr8:127316918-127358604  | 0 | 0.094709    |
| Cacna1e       | chr1:156239648-156573050  | 0 | 0.094444333 |
| 5430421F17Rik | chr8:26413121-26416742    | 0 | 0.094283    |
| Ptger3        | chr3:157229855-157307722  | 0 | 0.093029667 |
| Hs6st3        | chr14:119537486-120269037 | 0 | 0.0927429   |
| Cntn4         | chr6:105627738-106649299  | 0 | 0.092402667 |
| Ephx2         | chr14:66703213-66743337   | 0 | 0.092163    |
| Rasl11a       | chr5:147656646-147659302  | 0 | 0.091992667 |
| Nags          | chr11:102006900-102010790 | 0 | 0.091981333 |
| Myo18b        | chr5:113117895-113325382  | 0 | 0.091206333 |
| Olf1504       | chr19:13961750-13962698   | 0 | 0.091187667 |
| Nox1          | chrX:130621684-130646247  | 0 | 0.090798667 |

|               |                           |   |             |
|---------------|---------------------------|---|-------------|
| 1700063D05Rik | chr9:41014237-41025710    | 0 | 0.090028667 |
| Olfr1039      | chr2:85970858-85971818    | 0 | 0.089728    |
| 1700030M09Rik | chr8:124068287-124071552  | 0 | 0.089252    |
| Pcsk2         | chr2:143371868-143642018  | 0 | 0.089042667 |
| 4930452A19Rik | chr17:9943616-9968731     | 0 | 0.088584667 |
| 1700095B10Rik | chr5:113222311-113230721  | 0 | 0.088282333 |
| Fbxo43        | chr15:36079814-36094639   | 0 | 0.088096667 |
| BC049730      | chr7:25494277-25499554    | 0 | 0.087592333 |
| F2rl3         | chr8:75285778-75287784    | 0 | 0.086702333 |
| 1700020L24Rik | chr11:83251195-83254734   | 0 | 0.085630667 |
| Aspn          | chr13:49639811-49662931   | 0 | 0.084463333 |
| 1700020N18Rik | chr1:93301456-93302606    | 0 | 0.083647667 |
| Wisp3         | chr10:38870776-38883600   | 0 | 0.083549333 |
| Iglon5        | chr7:50728276-50745393    | 0 | 0.083401    |
| Dysf          | chr6:83958583-84161036    | 0 | 0.083191333 |
| Klk5          | chr7:51097638-51106551    | 0 | 0.082746    |
| Kctd16        | chr18:40418014-40690838   | 0 | 0.0825732   |
| Rims1         | chr1:22278502-22812563    | 0 | 0.081658333 |
| Zcchc24       | chr14:26531125-26588342   | 0 | 0.080904667 |
| Duox2         | chr2:122106172-122123901  | 0 | 0.0808766   |
| Slc1a3        | chr15:8584123-8660807     | 0 | 0.0802251   |
| Gm13580       | chr2:60249581-60250631    | 0 | 0.080069667 |
| Klk9          | chr7:51047260-51052126    | 0 | 0.079783667 |
| 1700065I17Rik | chr18:56748001-56754433   | 0 | 0.079390333 |
| Snx31         | chr15:36433816-36485327   | 0 | 0.079104667 |
| 2410137F16Rik | chr5:116888730-116915496  | 0 | 0.078289833 |
| Gabrb1        | chr5:72091254-72528483    | 0 | 0.078184267 |
| Gm10416       | chr5:110262519-110263161  | 0 | 0.077913667 |
| C1s           | chr6:124480361-124492377  | 0 | 0.077863667 |
| Fabp2         | chr3:122598309-122602424  | 0 | 0.077376    |
| Agxt          | chr1:95031852-95041998    | 0 | 0.077219333 |
| Gm20516       | chr17:38776391-38782598   | 0 | 0.076530667 |
| 5430427M07Rik | chr12:92284287-92295075   | 0 | 0.076030333 |
| Sh3rf3        | chr10:58276106-58601664   | 0 | 0.0759233   |
| Irx3          | chr8:94322409-94325553    | 0 | 0.074800833 |
| Vmn2r63       | chr7:50158620-50189159    | 0 | 0.074184667 |
| Gfi1          | chr5:108145673-108153363  | 0 | 0.074094667 |
| Pcp4l1        | chr1:173103394-173126399  | 0 | 0.073937333 |
| A630076J17Rik | chr3:107033531-107036949  | 0 | 0.07381     |
| 2410012E07Rik | chr14:71252739-71273761   | 0 | 0.073460667 |
| Gm10638       | chr8:89269597-89270959    | 0 | 0.073228333 |
| Kcnk13        | chr12:101202708-101300892 | 0 | 0.072769333 |
| Grap          | chr11:61466822-61486279   | 0 | 0.072659333 |
| Gm7168        | chr17:14085379-14087685   | 0 | 0.072450667 |
| Trh           | chr6:92192055-92194642    | 0 | 0.071954667 |
| Grik3         | chr4:125168074-125391417  | 0 | 0.071565    |
| Itgb3         | chr11:104469313-104531785 | 0 | 0.071479567 |
| Rhoj          | chr12:76409299-76502442   | 0 | 0.070953833 |
| Oc90          | chr15:65707614-65743849   | 0 | 0.070696667 |
| Gla1          | chr11:55328314-55421292   | 0 | 0.070391333 |
| Il9r          | chr11:32088996-32100279   | 0 | 0.070361333 |
| Arhgap9       | chr10:126760782-126766999 | 0 | 0.070166667 |

|               |                           |   |             |
|---------------|---------------------------|---|-------------|
| Xlr5a         | chrX:70352973-70363041    | 0 | 0.070085667 |
| 5330434G04Rik | chrX:102568332-102587093  | 0 | 0.069358    |
| 3110021A11Rik | chr6:119798210-119799034  | 0 | 0.069351667 |
| Slc10a4       | chr5:73398142-73404194    | 0 | 0.0690213   |
| Gm15471       | chr3:103607051-103612363  | 0 | 0.068573333 |
| Fam19a3       | chr3:104570322-104580465  | 0 | 0.068372667 |
| Plin1         | chr7:86866049-86877662    | 0 | 0.068081333 |
| Dusp9         | chrX:70884779-70888853    | 0 | 0.067667667 |
| Atp13a4       | chr16:29396123-29544950   | 0 | 0.067015333 |
| Gab3          | chrX:72233886-72330244    | 0 | 0.066649333 |
| Kcnn1         | chr8:73365947-73380907    | 0 | 0.066643667 |
| Ccdc63        | chr5:122558064-122588071  | 0 | 0.064908333 |
| Tepp          | chr8:97835414-97845228    | 0 | 0.064745333 |
| Mfi2          | chr16:31878895-31899105   | 0 | 0.064663733 |
| Rnf186        | chr4:138523026-138524281  | 0 | 0.064390333 |
| Speer7-ps1    | chr5:15186527-15220414    | 0 | 0.064350333 |
| 4933407G14Rik | chr10:74912254-74925849   | 0 | 0.063961667 |
| Tmem182       | chr1:40862445-40912112    | 0 | 0.063405667 |
| Trfr2         | chr5:138011078-138028709  | 0 | 0.061924667 |
| Nr5a1         | chr2:38548179-38570062    | 0 | 0.061449667 |
| Lefty1        | chr1:182865169-182868532  | 0 | 0.061075    |
| 4933427G17Rik | chr7:128126022-128158301  | 0 | 0.060322667 |
| Sp8           | chr12:120084801-120091051 | 0 | 0.059807    |
| Sox18         | chr2:181404541-181406345  | 0 | 0.059797667 |
| Aqp7          | chr4:40980106-40995169    | 0 | 0.059604233 |
| Spag8         | chr4:43664600-43666424    | 0 | 0.0595287   |
| Tmprss12      | chr15:100111267-100123484 | 0 | 0.059074667 |
| Sds           | chr5:120926555-120933914  | 0 | 0.058884667 |
| E130304I02Rik | chr7:36587610-36623093    | 0 | 0.058832333 |
| Cyp4f15       | chr17:32822603-32840294   | 0 | 0.058415333 |
| Clec14a       | chr12:59365706-59370245   | 0 | 0.058309533 |
| Sh3tc1        | chr5:36039828-36071925    | 0 | 0.058175    |
| Slc35d3       | chr10:19567722-19571265   | 0 | 0.058045    |
| BC006965      | chr11:112525240-112572670 | 0 | 0.057933    |
| AY074887      | chr9:54798063-54798761    | 0 | 0.057615333 |
| Tmem30c       | chr16:57266251-57292964   | 0 | 0.057411    |
| Sstr4         | chr2:148221112-148222500  | 0 | 0.057118333 |
| 1700003G13Rik | chr9:45126348-45130162    | 0 | 0.056761333 |
| Clca6         | chr3:144615449-144638009  | 0 | 0.056340067 |
| Ttll6         | chr11:95995099-96026766   | 0 | 0.056238    |
| Col6a2        | chr10:76058500-76086149   | 0 | 0.055859    |
| Agap2         | chr10:126515962-126530225 | 0 | 0.055821333 |
| E330023G01    | chr9:98649017-98720506    | 0 | 0.055503567 |
| Bend4         | chr5:67783385-67819038    | 0 | 0.0552427   |
| Ninj2         | chr6:120043397-120150356  | 0 | 0.054985667 |
| A530099J19Rik | chr13:19819285-19824820   | 0 | 0.054783667 |
| Kirrel        | chr3:86882513-86978669    | 0 | 0.054696367 |
| Cebpe         | chr14:55329199-55331011   | 0 | 0.054644667 |
| Ldhal6b       | chr17:5417322-5418767     | 0 | 0.054481333 |
| Adam5         | chr8:25843456-25934841    | 0 | 0.054401333 |
| Vnn3          | chr10:23571267-23589649   | 0 | 0.052625    |
| Slc2a3        | chr6:122677826-122692763  | 0 | 0.052431667 |

|               |                           |   |             |
|---------------|---------------------------|---|-------------|
| Klk1b11       | chr7:51251248-51255245    | 0 | 0.05169     |
| A430107P09Rik | chr14:54285614-54288010   | 0 | 0.0514495   |
| Adamtsl2      | chr2:26934900-26964133    | 0 | 0.051376367 |
| Btla          | chr16:45224449-45253008   | 0 | 0.050063667 |
| Gbgt1         | chr2:28352410-28360935    | 0 | 0.049931667 |
| D7Erttd143e   | chr7:3218784-3221016      | 0 | 0.049909333 |
| Klk1b3        | chr7:51453560-51457721    | 0 | 0.049630667 |
| Mas1          | chr17:13033870-13061009   | 0 | 0.049593667 |
| 6330409D20Rik | chr2:32588140-32596536    | 0 | 0.049019667 |
| Ttc9b         | chr7:28438942-28441226    | 0 | 0.048486    |
| Txndc6        | chr9:99356661-99380318    | 0 | 0.048330667 |
| Hoxa3         | chr6:52119060-52163066    | 0 | 0.048148    |
| Zbtb16        | chr9:48462401-48644050    | 0 | 0.048011667 |
| Rapsn         | chr2:90875783-90885886    | 0 | 0.047718    |
| Ccl20         | chr1:83113340-83115742    | 0 | 0.047687667 |
| Cnn1          | chr9:21903696-21913665    | 0 | 0.047411667 |
| Sftpc         | chr14:70920748-70923888   | 0 | 0.047375667 |
| C630031E19    | chr12:30360494-30371310   | 0 | 0.04726     |
| Slc22a30      | chr19:8410112-8479595     | 0 | 0.047146333 |
| Ppp1r42       | chr1:9958706-9999211      | 0 | 0.046927333 |
| Lyve1         | chr7:117994120-118006467  | 0 | 0.046862333 |
| Olf883        | chr9:37833392-37834322    | 0 | 0.046734333 |
| Ccl1          | chr19:4214391-4222615     | 0 | 0.046206333 |
| Upb1          | chr10:74869778-74902940   | 0 | 0.045854667 |
| 1700084C01Rik | chr1:171859069-171864784  | 0 | 0.045668    |
| Kcns1         | chr2:163989354-163996849  | 0 | 0.044895333 |
| Tex13         | chrX:137342845-137347972  | 0 | 0.044202333 |
| Srms          | chr2:180940267-180947876  | 0 | 0.043181333 |
| Tpte          | chr8:23393912-23481890    | 0 | 0.043144333 |
| Pcdh9         | chr14:93412919-94287951   | 0 | 0.042265667 |
| BC049762      | chr11:51067152-51076453   | 0 | 0.041741333 |
| Pear1         | chr3:87553018-87572875    | 0 | 0.0413313   |
| lsm1          | chr2:139503913-139584317  | 0 | 0.041085333 |
| Bsnd          | chr4:106156062-106164848  | 0 | 0.040301    |
| Syt15         | chrX:9462747-9571669      | 0 | 0.040291    |
| Vmn2r-ps129   | chr17:23141937-23143626   | 0 | 0.040154967 |
| Tmprss11c     | chr5:86660505-86718333    | 0 | 0.039978667 |
| Nlgn1         | chr3:25330762-26230831    | 0 | 0.039950667 |
| Acpt          | chr7:51508456-51512574    | 0 | 0.039861667 |
| Mefv          | chr16:3707214-3718124     | 0 | 0.038946333 |
| Nat8          | chr6:85780380-85781884    | 0 | 0.038907333 |
| Zfpm1         | chr8:124806040-124861147  | 0 | 0.0388654   |
| Tnnt1         | chr7:4456264-4467577      | 0 | 0.038799667 |
| Tmprss15      | chr16:78953708-79091342   | 0 | 0.038761333 |
| Gm16701       | chr1:168904153-168929861  | 0 | 0.038693    |
| Olf10         | chr11:49131049-49131985   | 0 | 0.038623333 |
| 6030440G07Rik | chr12:112232607-112252082 | 0 | 0.038104    |
| Jph3          | chr8:124254458-124314983  | 0 | 0.038019    |
| Nkain3        | chr4:20170999-20705815    | 0 | 0.037668    |
| Acap1         | chr11:69695068-69709041   | 0 | 0.037469667 |
| Aspdh         | chr7:51720804-51723121    | 0 | 0.037156667 |
| Scg2          | chr1:79431243-79436665    | 0 | 0.037032    |



|               |                           |   |             |
|---------------|---------------------------|---|-------------|
| 1700081H04Rik | chr5:119558244-119564552  | 0 | 0.036730667 |
| Xlr5b         | chrX:70394179-70403738    | 0 | 0.036412667 |
| Kcnk10        | chr12:99672203-99816150   | 0 | 0.036266667 |
| Neur12        | chr2:164656229-164659096  | 0 | 0.035795333 |
| Gm13023       | chr4:143379236-143385488  | 0 | 0.035440667 |
| Lzts1         | chr8:71659401-71664852    | 0 | 0.035326    |
| A430093F15Rik | chr19:10815436-10860533   | 0 | 0.035316667 |
| Tmem229a      | chr6:24901140-24906125    | 0 | 0.035284333 |
| Tgm7          | chr2:120919324-120935527  | 0 | 0.035169    |
| Clec2l        | chr6:38613068-38630864    | 0 | 0.034951333 |
| Cnm1          | chr19:43514925-43571703   | 0 | 0.034882333 |
| D630023F18Rik | chr1:65153886-65169767    | 0 | 0.034151333 |
| Slc12a1       | chr2:124978335-125055737  | 0 | 0.034136667 |
| 1700106J16Rik | chr11:88107544-88108763   | 0 | 0.033344333 |
| Gm15070       | chrX:140891124-140911606  | 0 | 0.0333209   |
| Gabrr1        | chr4:33219530-33250563    | 0 | 0.0329631   |
| Gpr83         | chr9:14664697-14673943    | 0 | 0.032946933 |
| Rhd           | chr4:134420450-134452087  | 0 | 0.032645733 |
| Fndc7         | chr3:108656595-108692926  | 0 | 0.032179133 |
| Gpr142        | chr11:114660237-114668059 | 0 | 0.031631467 |
| 5330437I02Rik | chr18:65857921-65911191   | 0 | 0.031328967 |
| 5930403L14Rik | chr4:154004799-154010476  | 0 | 0.0308178   |
| Adra1d        | chr2:131371092-131388021  | 0 | 0.030804467 |
| Tspan10       | chr11:120303944-120308635 | 0 | 0.030294933 |
| Hgd           | chr16:37580238-37632112   | 0 | 0.030211933 |
| Gm13083       | chr4:143204905-143208498  | 0 | 0.029847667 |
| 4933409G03Rik | chr2:68420469-68454520    | 0 | 0.029799067 |
| Cyp2d26       | chr15:82620536-82624675   | 0 | 0.029664867 |
| Epsti1        | chr14:78304045-78402463   | 0 | 0.029563267 |
| Cyp1a1        | chr9:57535734-57551631    | 0 | 0.029301233 |
| Dlk1          | chr12:110691032-110701546 | 0 | 0.0292196   |
| Vmn2r-ps11    | chr3:64436784-64648665    | 0 | 0.028954467 |
| Slc6a13       | chr6:121250313-121287736  | 0 | 0.028951733 |
| Trank1        | chr9:111214242-111298279  | 0 | 0.028896767 |
| Kcna6         | chr6:126658346-126690692  | 0 | 0.02889     |
| Gm711         | chr2:26789588-26809016    | 0 | 0.028670867 |
| Ms4a18        | chr19:11071514-11092453   | 0 | 0.028632133 |
| Crp           | chr1:174628186-174630097  | 0 | 0.028608    |
| Uts2r         | chr11:121021584-121023287 | 0 | 0.0285122   |
| Crtac1        | chr19:42357526-42506273   | 0 | 0.027961767 |
| Teddm1        | chr1:155738775-155740190  | 0 | 0.027919133 |
| Clec12a       | chr6:129300261-129315321  | 0 | 0.0279155   |
| Gsg1          | chr6:135187347-135204354  | 0 | 0.027754267 |
| Trim10        | chr17:37006518-37014778   | 0 | 0.027599967 |
| Rasl10b       | chr11:83223573-83234540   | 0 | 0.027453167 |
| 1810018F18Rik | chr19:58773406-58775813   | 0 | 0.0271967   |
| Gpr50         | chrX:68916941-68921264    | 0 | 0.026755567 |
| Sdk2          | chr11:113642103-113927265 | 0 | 0.026302167 |
| D930032P07Rik | chr19:28752713-28794517   | 0 | 0.025440867 |
| Dkk4          | chr8:23734514-23738018    | 0 | 0.025440867 |
| 4933401D09Rik | chr17:15768751-15778066   | 0 | 0.0251898   |
| ltgam         | chr7:135206153-135262005  | 0 | 0.0251252   |

|               |                           |   |             |
|---------------|---------------------------|---|-------------|
| Glt1d1        | chr5:128112631-128187890  | 0 | 0.024938167 |
| Hmx3          | chr7:138686476-138688445  | 0 | 0.024275133 |
| Glp2r         | chr11:67519931-67584655   | 0 | 0.024087867 |
| Fam69b        | chr2:26483976-26492017    | 0 | 0.023825233 |
| Vmn2r115      | chr17:23480943-23497095   | 0 | 0.023758333 |
| Thbs2         | chr17:14802506-14831269   | 0 | 0.0235542   |
| Calcoco2      | chr11:95960639-95973276   | 0 | 0.0234244   |
| Timp4         | chr6:115195633-115201867  | 0 | 0.023288567 |
| Gm1564        | chr11:102526901-102543551 | 0 | 0.023128133 |
| 5031410I06Rik | chr5:26425207-26431854    | 0 | 0.023085167 |
| Slc14a2       | chr18:78342882-78793689   | 0 | 0.023059033 |
| Prdx6b        | chr2:80132626-80135515    | 0 | 0.023038233 |
| Gm14725       | chrX:67798732-67799560    | 0 | 0.022729133 |
| Slitrk2       | chrX:63902492-63914577    | 0 | 0.022563233 |
| D030025P21Rik | chr12:86216751-86220705   | 0 | 0.022500733 |
| 4930567H17Rik | chrX:67647075-67647915    | 0 | 0.022295967 |
| Tph1          | chr7:53902500-53927907    | 0 | 0.0221028   |
| Lrrc15        | chr16:30269387-30283340   | 0 | 0.022032367 |
| Sftpa1        | chr14:41945076-41949662   | 0 | 0.021896333 |
| Prrg3         | chrX:69208359-69218067    | 0 | 0.021700233 |
| Ptpn20        | chr14:34402455-34453940   | 0 | 0.021430167 |
| Lix1          | chr17:17539649-17596351   | 0 | 0.021341233 |
| Slc24a3       | chr2:145068346-145467675  | 0 | 0.0209445   |
| Pinc          | chr1:73437958-73454143    | 0 | 0.020803867 |
| Rad51ap1      | chr6:126873436-126889573  | 0 | 0.020701667 |
| Gpr119        | chrX:46021155-46027655    | 0 | 0.020673233 |
| Hrh2          | chr13:54287497-54317801   | 0 | 0.020500067 |
| Aif1l         | chr2:31805822-31828962    | 0 | 0.020475233 |
| A630075F10Rik | chr2:169886739-169896278  | 0 | 0.0204003   |
| Csmd3         | chr15:47412183-48623535   | 0 | 0.02015829  |
| Plcx3         | chr15:4325490-4525579     | 0 | 0.0200238   |
| Mia2          | chr12:60196786-60210117   | 0 | 0.019806    |
| Ccdc158       | chr5:93037320-93104153    | 0 | 0.019636133 |
| Bicc1         | chr10:70387847-70622382   | 0 | 0.019453867 |
| Lin28b        | chr10:45096424-45190007   | 0 | 0.0194313   |
| Vmn2r62       | chr7:50019807-50048866    | 0 | 0.019318633 |
| Nfe2          | chr15:103078648-103085847 | 0 | 0.0192625   |
| F12           | chr13:55519326-55528163   | 0 | 0.019211733 |
| Col19a1       | chr1:24264521-24594276    | 0 | 0.019023967 |
| Ppp1r3d       | chr2:178145911-178149177  | 0 | 0.018377933 |
| Slc9a10       | chr16:45535378-45607114   | 0 | 0.0183355   |
| BC030867      | chr11:102110195-102126497 | 0 | 0.0182449   |
| C530028O21Rik | chr6:124946737-124953117  | 0 | 0.0182207   |
| Dpep2         | chr8:108508956-108520323  | 0 | 0.018049067 |
| Slc6a7        | chr18:61155033-61173853   | 0 | 0.0179262   |
| Kcnj4         | chr15:79314143-79335671   | 0 | 0.0173219   |
| 4932412D23Rik | chr16:42725814-42875700   | 0 | 0.017271533 |
| Siglece       | chr7:50906439-50915531    | 0 | 0.017134867 |
| Fer1l4        | chr2:155844875-155878683  | 0 | 0.017117233 |
| Cldn11        | chr3:31048841-31063248    | 0 | 0.0168977   |
| Nyx           | chrX:13044797-13066439    | 0 | 0.016465067 |
| Zfyve28       | chr5:34537542-34630973    | 0 | 0.016370633 |

|               |                          |   |             |
|---------------|--------------------------|---|-------------|
| Fam169b       | chr7:75418724-75507976   | 0 | 0.016314567 |
| Adamts4       | chr1:173180552-173190053 | 0 | 0.0162178   |
| Necab2        | chr8:121970618-121996535 | 0 | 0.015947567 |
| Pla1a         | chr16:38396202-38433225  | 0 | 0.015920433 |
| Adamts13      | chr7:89484203-89762958   | 0 | 0.0158755   |
| Ttk           | chr9:83728295-83765997   | 0 | 0.015799767 |
| Rbm44         | chr1:93041679-93067372   | 0 | 0.015424867 |
| Foxa3         | chr7:19598631-19608888   | 0 | 0.015354533 |
| Psg26         | chr7:19059930-19069498   | 0 | 0.015196633 |
| E330013P04Rik | chr19:60220577-60238494  | 0 | 0.0150986   |
| Fign          | chr2:63810630-63936069   | 0 | 0.015097933 |
| Cyp4a31       | chr4:115236253-115251620 | 0 | 0.015036733 |
| Sox1          | chr8:12395518-12399555   | 0 | 0.014675133 |
| Gpr150        | chr13:76192298-76194444  | 0 | 0.014505767 |
| Adora2a       | chr10:74779687-74797533  | 0 | 0.014474267 |
| Ogn           | chr13:49703439-49719869  | 0 | 0.014437    |
| Cd200r4       | chr16:44820840-44839263  | 0 | 0.0142848   |
| 1110032F04Rik | chr3:68673507-68676085   | 0 | 0.014205267 |
| Slc13a2       | chr11:78210777-78235687  | 0 | 0.0141762   |
| C730036E19Rik | chr1:152985163-152991225 | 0 | 0.0138428   |
| Olf1392       | chr11:49106798-49107824  | 0 | 0.013744633 |
| Tbx19         | chr1:167067983-167090904 | 0 | 0.013718567 |
| Tll2          | chr19:41158470-41281264  | 0 | 0.013473833 |
| Gsdma3        | chr11:98487673-98499403  | 0 | 0.013276267 |
| Sec14l5       | chr16:5147201-5184027    | 0 | 0.013203    |
| Amigo2        | chr15:97074504-97077718  | 0 | 0.013149167 |
| Meox2         | chr12:37835132-37906115  | 0 | 0.013135067 |
| Kcng2         | chr18:80491282-80560993  | 0 | 0.012912733 |
| Gm6531        | chr8:87675822-87697521   | 0 | 0.0128407   |
| Cdh15         | chr8:125372273-125391297 | 0 | 0.0127754   |
| Csf3r         | chr4:125701902-125722219 | 0 | 0.012618767 |
| Ly9           | chr1:173518743-173537491 | 0 | 0.012542467 |
| Kcnc4         | chr3:107241220-107261816 | 0 | 0.0120005   |
| Gm6313        | chr6:148555307-148562831 | 0 | 0.011939767 |
| Vmn2r117      | chr17:23596641-23616564  | 0 | 0.011879167 |
| Slc26a3       | chr12:32123165-32158584  | 0 | 0.011613833 |
| Gucy1b2       | chr14:63011506-63075126  | 0 | 0.011405633 |
| Skint4        | chr4:111754074-111840681 | 0 | 0.011239267 |
| Dchs1         | chr7:112901502-112936064 | 0 | 0.010757333 |
| L1td1         | chr4:98393444-98405177   | 0 | 0.010278833 |
| Ernm          | chr2:57897525-57905163   | 0 | 0.0101591   |
| Trem1         | chr17:48371921-48386091  | 0 | 0.010047133 |
| G630071F17    | chr18:60823063-60831278  | 0 | 0.009774333 |
| Slc12a3       | chr8:96853107-96890121   | 0 | 0.0090952   |
| Atp12a        | chr14:56983904-57007388  | 0 | 0.0089913   |
| Gm10471       | chr5:26408711-26415804   | 0 | 0.008965967 |
| Cyp4a10       | chr4:115190891-115206254 | 0 | 0.0089657   |
| Smarca1       | chrX:45162546-45245729   | 0 | 0.008748067 |
| Gpr141        | chr13:19841550-19916126  | 0 | 0.0087128   |
| Nlrp1c-ps     | chr11:71055931-71098734  | 0 | 0.008648367 |
| Rgag1         | chrX:139534145-139538878 | 0 | 0.008574133 |
| Ccdc80        | chr16:45094165-45128037  | 0 | 0.008167867 |

|               |                          |   |             |
|---------------|--------------------------|---|-------------|
| Dennd2a       | chr6:39412376-39507833   | 0 | 0.0079612   |
| Sis           | chr3:72692481-72770788   | 0 | 0.007497267 |
| Ahrr          | chr13:74348565-74429757  | 0 | 0.007438267 |
| Vmn2r5        | chr3:64294742-64311607   | 0 | 0.007396267 |
| Gm19434       | chr6:135138497-135144977 | 0 | 0.0071207   |
| Vmn1r45       | chr6:89881643-89890501   | 0 | 0.007002967 |
| Zfp536        | chr7:38264127-38554771   | 0 | 0.006684267 |
| Nid2          | chr14:20570478-20631009  | 0 | 0.006361167 |
| Prx           | chr7:28284342-28305060   | 0 | 0.006298867 |
| lpcef1        | chr10:3323355-3460176    | 0 | 0.006285833 |
| Zfp423        | chr8:90185708-90483494   | 0 | 0.005978367 |
| Galntl6       | chr8:60252848-61390424   | 0 | 0.005755333 |
| 4930511M06Rik | chr18:57705014-57712051  | 0 | 0.005752    |
| Gm4788        | chr1:141594495-141677816 | 0 | 0.005616267 |
| Sv2b          | chr7:82259780-82454148   | 0 | 0.005499333 |
| Abca14        | chr7:127347477-127468866 | 0 | 0.005427167 |
| Gm9696        | chr3:59756230-59777516   | 0 | 0.004943967 |
| Gm9268        | chr7:50274167-50303476   | 0 | 0.004761233 |
| Pkd1l2        | chr8:119519578-119606349 | 0 | 0.004687167 |
| Vmn2r38       | chr7:9080031-9103001     | 0 | 0.0043337   |
| Spna1         | chr1:176102906-176178580 | 0 | 0.0041043   |
| Abca4         | chr3:121747377-121882979 | 0 | 0.003989733 |
| Vmn2r41       | chr7:9965778-9989425     | 0 | 0.002988757 |
| Wdfy4         | chr14:33772732-33998252  | 0 | 0.00296478  |
| Vmn1r58       | chr7:5360491-5364747     | 0 | 0.002842323 |
| Unc80         | chr1:66515020-66745722   | 0 | 0.00210757  |
| Olfr1360      | chr13:21765869-21766849  | 0 | 1.75E-05    |
| Gpr39         | chr1:127573572-127770438 | 0 | 2.88E-08    |
| Msx1as        | chr5:38211802-38213990   | 0 | 4.44E-09    |
| Sox17         | chr1:4481008-4486494     | 0 | 0           |
| Oprk1         | chr1:5578573-5596214     | 0 | 0           |
| Npbwr1        | chr1:5903787-5907479     | 0 | 0           |
| Fam150a       | chr1:6349411-6384812     | 0 | 0           |
| Snord87       | chr1:9932550-9932624     | 0 | 0           |
| Cpa6          | chr1:10314807-10710024   | 0 | 0           |
| Prdm14        | chr1:13103508-13117244   | 0 | 0           |
| Msc           | chr1:14743428-14746047   | 0 | 0           |
| Crisp4        | chr1:18105271-18127132   | 0 | 0           |
| Defb44-ps     | chr1:18200133-18213645   | 0 | 0           |
| Defb18        | chr1:18226553-18227524   | 0 | 0           |
| Defb41        | chr1:18241058-18255219   | 0 | 0           |
| Gm15386       | chr1:18250604-18255219   | 0 | 0           |
| Tfap2d        | chr1:19093102-19156413   | 0 | 0           |
| Tfap2b        | chr1:19198994-19228815   | 0 | 0           |
| Mir206        | chr1:20669090-20669163   | 0 | 0           |
| Mir133b       | chr1:20672849-20672968   | 0 | 0           |
| Il17a         | chr1:20720985-20724577   | 0 | 0           |
| Il17f         | chr1:20767229-20774351   | 0 | 0           |
| 6720483E21Rik | chr1:20878730-20880554   | 0 | 0           |
| Gm4956        | chr1:21275326-21288393   | 0 | 0           |
| Khdc1a        | chr1:21339757-21342280   | 0 | 0           |
| Khdc1c        | chr1:21358411-21359824   | 0 | 0           |

|               |                        |   |   |
|---------------|------------------------|---|---|
| 4933415F23Rik | chr1:23107312-23109092 | 0 | 0 |
| Mir30a        | chr1:23279107-23279178 | 0 | 0 |
| Mir30c-2      | chr1:23298539-23298623 | 0 | 0 |
| Col9a1        | chr1:24184448-24259577 | 0 | 0 |
| Gm20172       | chr1:25333248-25334799 | 0 | 0 |
| 4931408C20Rik | chr1:26738645-26744305 | 0 | 0 |
| Gm597         | chr1:28832966-28837097 | 0 | 0 |
| 4931428L18Rik | chr1:31197922-31279501 | 0 | 0 |
| Lgsn          | chr1:31233279-31261570 | 0 | 0 |
| 4930521A18Rik | chr1:31279683-31281132 | 0 | 0 |
| Gm4850        | chr1:31321691-31324906 | 0 | 0 |
| Bend6         | chr1:33908896-33964466 | 0 | 0 |
| Mir5103       | chr1:34489965-34490044 | 0 | 0 |
| Prss39        | chr1:34555274-34559907 | 0 | 0 |
| Prss40        | chr1:34609176-34617788 | 0 | 0 |
| Fam123c       | chr1:34636537-34647789 | 0 | 0 |
| AA619741      | chr1:34690379-34693055 | 0 | 0 |
| Cnga3         | chr1:37276105-37320229 | 0 | 0 |
| Nms           | chr1:38995993-39007121 | 0 | 0 |
| Snord89       | chr1:39605591-39605685 | 0 | 0 |
| Gm3646        | chr1:39860985-39862177 | 0 | 0 |
| 1700066B17Rik | chr1:39899272-39904175 | 0 | 0 |
| Il1rl1        | chr1:40496493-40522259 | 0 | 0 |
| Il18rap       | chr1:40572206-40606142 | 0 | 0 |
| 4930448I06Rik | chr1:41224404-41238097 | 0 | 0 |
| 2610017I09Rik | chr1:42705044-42751670 | 0 | 0 |
| Pou3f3        | chr1:42753990-42757054 | 0 | 0 |
| 2900092D14Rik | chr1:42757180-42760021 | 0 | 0 |
| Gpr45         | chr1:43009716-43092294 | 0 | 0 |
| 4930521E06Rik | chr1:44796519-44801794 | 0 | 0 |
| Col3a1        | chr1:45368382-45406551 | 0 | 0 |
| 9330175M20Rik | chr1:51275229-51390623 | 0 | 0 |
| Mstn          | chr1:53118506-53124923 | 0 | 0 |
| 1700019A02Rik | chr1:53215420-53244461 | 0 | 0 |
| Boll          | chr1:55356912-55420313 | 0 | 0 |
| Hsfy2         | chr1:56692892-56694295 | 0 | 0 |
| 4930558J18Rik | chr1:57416065-57434388 | 0 | 0 |
| Cdk15         | chr1:59313750-59409213 | 0 | 0 |
| Snord70       | chr1:59748801-59748854 | 0 | 0 |
| Snord11       | chr1:59761651-59761714 | 0 | 0 |
| 9530026F06Rik | chr1:61435275-61452748 | 0 | 0 |
| Adam23        | chr1:63492477-63643089 | 0 | 0 |
| Dytn          | chr1:63669424-63733501 | 0 | 0 |
| Gm13749       | chr1:64011300-64015573 | 0 | 0 |
| Akr1cl        | chr1:65059659-65079322 | 0 | 0 |
| Cryge         | chr1:65095130-65097737 | 0 | 0 |
| Crygd         | chr1:65108411-65110014 | 0 | 0 |
| Crygc         | chr1:65118105-65120095 | 0 | 0 |
| Crygb         | chr1:65126800-65128841 | 0 | 0 |
| Cryga         | chr1:65146962-65149937 | 0 | 0 |
| Pth2r         | chr1:65357830-65435818 | 0 | 0 |
| Crygf         | chr1:65973095-65974878 | 0 | 0 |

|               |                        |   |   |
|---------------|------------------------|---|---|
| Myl1          | chr1:66970869-66991630 | 0 | 0 |
| Cps1          | chr1:67169639-67277022 | 0 | 0 |
| Apol7d        | chr1:71699908-71709417 | 0 | 0 |
| Ankar         | chr1:72689553-72747138 | 0 | 0 |
| Tnp1          | chr1:73061648-73062473 | 0 | 0 |
| 1700027A15Rik | chr1:73062609-73072082 | 0 | 0 |
| D530049I02Rik | chr1:73445541-73477353 | 0 | 0 |
| 6030407O03Rik | chr1:73664954-73911040 | 0 | 0 |
| Cxcr1         | chr1:74238359-74241205 | 0 | 0 |
| Mir26b        | chr1:74440883-74440968 | 0 | 0 |
| Fev           | chr1:74928082-74931982 | 0 | 0 |
| Mir375        | chr1:74947231-74947295 | 0 | 0 |
| lhh           | chr1:74991891-74998225 | 0 | 0 |
| Resp18        | chr1:75268776-75274955 | 0 | 0 |
| Des           | chr1:75356918-75364290 | 0 | 0 |
| Gm15179       | chr1:75364784-75371590 | 0 | 0 |
| Speg          | chr1:75371871-75428881 | 0 | 0 |
| Pax3          | chr1:78097841-78193711 | 0 | 0 |
| Mogat1        | chr1:78507634-78534748 | 0 | 0 |
| Kcne4         | chr1:78813523-78816600 | 0 | 0 |
| Fam124b       | chr1:80195273-80210519 | 0 | 0 |
| 1700016L21Rik | chr1:80442506-80472235 | 0 | 0 |
| 9430031J16Rik | chr1:81073891-81268226 | 0 | 0 |
| Sphkap        | chr1:83252355-83404775 | 0 | 0 |
| Mir5126       | chr1:84692413-84692490 | 0 | 0 |
| 4933407L21Rik | chr1:87825057-87828331 | 0 | 0 |
| Gpr55         | chr1:87836111-87857630 | 0 | 0 |
| Spata3        | chr1:87918516-87926533 | 0 | 0 |
| B3gnt7        | chr1:88199795-88203880 | 0 | 0 |
| Snord82       | chr1:88252834-88252902 | 0 | 0 |
| Nmur1         | chr1:88282899-88284716 | 0 | 0 |
| 1700019O17Rik | chr1:88322903-88324624 | 0 | 0 |
| Alpl2         | chr1:88983265-88986503 | 0 | 0 |
| Alpi          | chr1:88994576-88998181 | 0 | 0 |
| Akp3          | chr1:89021582-89024487 | 0 | 0 |
| Ecel1         | chr1:89044229-89051602 | 0 | 0 |
| Prss56        | chr1:89080067-89084979 | 0 | 0 |
| Chrng         | chr1:89102385-89108410 | 0 | 0 |
| 3110079O15Rik | chr1:89366838-89372034 | 0 | 0 |
| Neu2          | chr1:89470601-89494415 | 0 | 0 |
| Trpm8         | chr1:90203286-90285426 | 0 | 0 |
| Spp2          | chr1:90303593-90323013 | 0 | 0 |
| Glrp1         | chr1:90396445-90406641 | 0 | 0 |
| C030007H22Rik | chr1:91256916-91302708 | 0 | 0 |
| Asb18         | chr1:91849252-91911152 | 0 | 0 |
| Col6a3        | chr1:92663434-92740548 | 0 | 0 |
| Twist2        | chr1:93698053-93744604 | 0 | 0 |
| Olfr1413      | chr1:94469701-94470783 | 0 | 0 |
| Olfr1412      | chr1:94484908-94485874 | 0 | 0 |
| Mir149        | chr1:94746954-94747020 | 0 | 0 |
| Aqp12         | chr1:94902910-94908846 | 0 | 0 |
| Gal3st2       | chr1:95757920-95773071 | 0 | 0 |

|               |                          |   |   |
|---------------|--------------------------|---|---|
| Gm9994        | chr1:95815013-95837816   | 0 | 0 |
| Gm6086        | chr1:95887085-95908116   | 0 | 0 |
| Neu4          | chr1:95917069-95924907   | 0 | 0 |
| Pdcd1         | chr1:95934881-95949130   | 0 | 0 |
| 4930440C22Rik | chr1:96694018-96699049   | 0 | 0 |
| 4930598F16Rik | chr1:97597760-97613095   | 0 | 0 |
| 1700063A18Rik | chr1:97887235-97918335   | 0 | 0 |
| 4930533P14Rik | chr1:98508633-98559150   | 0 | 0 |
| Slco6b1       | chr1:98802752-98894137   | 0 | 0 |
| Slco6c1       | chr1:98956025-99024880   | 0 | 0 |
| 1810006J02Rik | chr1:100028043-100041232 | 0 | 0 |
| Slco6d1       | chr1:100317700-100405957 | 0 | 0 |
| Cntnap5b      | chr1:101669341-102382519 | 0 | 0 |
| Gm20268       | chr1:103052344-103071779 | 0 | 0 |
| Cdh7          | chr1:111880313-112035578 | 0 | 0 |
| Cdh19         | chr1:112785771-112873949 | 0 | 0 |
| Sctr          | chr1:121903556-121960109 | 0 | 0 |
| Tmem37        | chr1:121963953-121970357 | 0 | 0 |
| Steap3        | chr1:122122992-122167659 | 0 | 0 |
| C1ql2         | chr1:122237158-122239751 | 0 | 0 |
| Marco         | chr1:122371114-122401661 | 0 | 0 |
| En1           | chr1:122499063-122504568 | 0 | 0 |
| Mir128-1      | chr1:130098937-130099007 | 0 | 0 |
| Zp3r          | chr1:132473282-132526183 | 0 | 0 |
| Il24          | chr1:132778650-132783988 | 0 | 0 |
| Il20          | chr1:132803768-132807873 | 0 | 0 |
| Il19          | chr1:132829232-132835818 | 0 | 0 |
| Avpr1b        | chr1:133495690-133508577 | 0 | 0 |
| Mir135b       | chr1:134094664-134094761 | 0 | 0 |
| Kiss1         | chr1:135223788-135226299 | 0 | 0 |
| 4931440L10Rik | chr1:136437521-136443599 | 0 | 0 |
| Gpr25         | chr1:138155490-138157450 | 0 | 0 |
| Gm19705       | chr1:138579972-138587382 | 0 | 0 |
| Gm16880       | chr1:138592787-138622305 | 0 | 0 |
| Nr5a2         | chr1:138740160-138857025 | 0 | 0 |
| Mir181a-1     | chr1:139863031-139863118 | 0 | 0 |
| Mir181b-1     | chr1:139863215-139863295 | 0 | 0 |
| Atp6v1g3      | chr1:140170314-140186039 | 0 | 0 |
| Gm5833        | chr1:140536671-140578652 | 0 | 0 |
| Lhx9          | chr1:140721762-140744156 | 0 | 0 |
| 4933436E23Rik | chr1:141276028-141299429 | 0 | 0 |
| F13b          | chr1:141398283-141420333 | 0 | 0 |
| Cfhr1         | chr1:141443640-141456799 | 0 | 0 |
| Cfhr2         | chr1:141706868-141755276 | 0 | 0 |
| Kcnt2         | chr1:142142833-142506838 | 0 | 0 |
| 4930590L20Rik | chr1:142466752-142552979 | 0 | 0 |
| Fam5c         | chr1:148342795-148749602 | 0 | 0 |
| Pdc           | chr1:152166546-152181036 | 0 | 0 |
| 2310030A07Rik | chr1:152167810-152193901 | 0 | 0 |
| 5830403L16Rik | chr1:155696671-155698325 | 0 | 0 |
| Zfp648        | chr1:156048316-156052804 | 0 | 0 |
| 4930452N14Rik | chr1:156088650-156104036 | 0 | 0 |

|               |                          |   |   |
|---------------|--------------------------|---|---|
| Lhx4          | chr1:157548823-157589157 | 0 | 0 |
| Fam163a       | chr1:157923095-158135156 | 0 | 0 |
| Tdrd5         | chr1:158185425-158233479 | 0 | 0 |
| Nphs2         | chr1:158240865-158258166 | 0 | 0 |
| Sec16b        | chr1:159436926-159498555 | 0 | 0 |
| Fam5b         | chr1:160175399-160286391 | 0 | 0 |
| Astn1         | chr1:160292434-160621917 | 0 | 0 |
| Mir488        | chr1:160435755-160435864 | 0 | 0 |
| Mir1843b      | chr1:161270488-161270554 | 0 | 0 |
| Tnr           | chr1:161453899-161855053 | 0 | 0 |
| Mir5117       | chr1:162967483-162967574 | 0 | 0 |
| Snord47       | chr1:162968222-162968287 | 0 | 0 |
| 4930469G21Rik | chr1:163086973-163089445 | 0 | 0 |
| Fasl          | chr1:163710822-163718626 | 0 | 0 |
| 2810442N19Rik | chr1:163935099-163946616 | 0 | 0 |
| Mir199a-2     | chr1:164147944-164148054 | 0 | 0 |
| Mir214        | chr1:164153498-164153608 | 0 | 0 |
| Myoc          | chr1:164569280-164579825 | 0 | 0 |
| 7420461P10Rik | chr1:164577373-164588350 | 0 | 0 |
| 4921528O07Rik | chr1:164954432-165015801 | 0 | 0 |
| Mettl11b      | chr1:165633123-165655363 | 0 | 0 |
| Sell          | chr1:165992206-166010916 | 0 | 0 |
| Dpt           | chr1:166726862-166754397 | 0 | 0 |
| LOC433374     | chr1:166793251-166801569 | 0 | 0 |
| Xcl1          | chr1:166861778-166865641 | 0 | 0 |
| 4930568G15Rik | chr1:166996747-167022061 | 0 | 0 |
| Mael          | chr1:168131515-168168875 | 0 | 0 |
| Gm4846        | chr1:168413743-168427719 | 0 | 0 |
| Gm4847        | chr1:168559101-168577824 | 0 | 0 |
| Lrrc52        | chr1:169375805-169396911 | 0 | 0 |
| Rxrg          | chr1:169528492-169569754 | 0 | 0 |
| Lmx1a         | chr1:169619688-169778864 | 0 | 0 |
| Rgs5          | chr1:171585631-171623657 | 0 | 0 |
| Sh2d1b2       | chr1:172163001-172181718 | 0 | 0 |
| Sh2d1b1       | chr1:172207454-172215793 | 0 | 0 |
| Fcrlb         | chr1:172837403-172843072 | 0 | 0 |
| Fcrla         | chr1:172847724-172857714 | 0 | 0 |
| Fcgr4         | chr1:172949056-172959892 | 0 | 0 |
| Slamf1        | chr1:173697262-173731315 | 0 | 0 |
| Slamf6        | chr1:173847667-173873999 | 0 | 0 |
| Nhlh1         | chr1:173982422-173987727 | 0 | 0 |
| Slamf8        | chr1:174511507-174520699 | 0 | 0 |
| Fcrl6         | chr1:174526770-174532682 | 0 | 0 |
| Apcs          | chr1:174824091-174825185 | 0 | 0 |
| Olfr16        | chr1:174886898-174887948 | 0 | 0 |
| Olfr1408      | chr1:175060413-175061346 | 0 | 0 |
| Olfr1406      | chr1:175113572-175114635 | 0 | 0 |
| Olfr218       | chr1:175133488-175134430 | 0 | 0 |
| Olfr1404      | chr1:175145737-175146771 | 0 | 0 |
| Fcer1a        | chr1:175151401-175157360 | 0 | 0 |
| Olfr418-ps1   | chr1:175200277-175201268 | 0 | 0 |
| Gm11062       | chr1:175204591-175207887 | 0 | 0 |



|               |                          |   |   |
|---------------|--------------------------|---|---|
| Darc          | chr1:175262016-175263634 | 0 | 0 |
| Cadm3         | chr1:175264384-175297826 | 0 | 0 |
| BC094916      | chr1:175451441-175466088 | 0 | 0 |
| Pydc4         | chr1:175522087-175529405 | 0 | 0 |
| Pyhin1        | chr1:175560989-175578059 | 0 | 0 |
| Pydc3         | chr1:175603810-175628523 | 0 | 0 |
| Olfr433       | chr1:175972063-175973067 | 0 | 0 |
| Olfr432       | chr1:175980505-175981444 | 0 | 0 |
| Olfr430       | chr1:175999430-176000384 | 0 | 0 |
| Olfr429       | chr1:176019168-176020111 | 0 | 0 |
| Olfr427       | chr1:176029590-176030538 | 0 | 0 |
| Olfr426       | chr1:176029590-176030541 | 0 | 0 |
| Olfr231       | chr1:176047221-176048145 | 0 | 0 |
| Olfr230-ps1   | chr1:176047222-176048178 | 0 | 0 |
| Olfr424       | chr1:176066876-176067824 | 0 | 0 |
| Olfr421       | chr1:176081611-176082661 | 0 | 0 |
| Olfr420       | chr1:176088852-176089898 | 0 | 0 |
| Olfr419       | chr1:176180019-176181107 | 0 | 0 |
| 1810030J14Rik | chr1:176260648-176263008 | 0 | 0 |
| Olfr417       | chr1:176299049-176299979 | 0 | 0 |
| Olfr248       | chr1:176321176-176322186 | 0 | 0 |
| Olfr414       | chr1:176360560-176361515 | 0 | 0 |
| Olfr220       | chr1:176378755-176379733 | 0 | 0 |
| Kmo           | chr1:177562323-177590984 | 0 | 0 |
| Wdr64         | chr1:177628723-177745864 | 0 | 0 |
| Mir350        | chr1:178702455-178702554 | 0 | 0 |
| 2310043L19Rik | chr1:179571672-179573074 | 0 | 0 |
| Mixl1         | chr1:182623178-182627165 | 0 | 0 |
| Lefty2        | chr1:182823249-182829233 | 0 | 0 |
| 9130409I23Rik | chr1:182981367-182990798 | 0 | 0 |
| Cnih3         | chr1:183282758-183390772 | 0 | 0 |
| Vmn1r1        | chr1:184087308-184088229 | 0 | 0 |
| 1700112H15Rik | chr1:186351719-186381570 | 0 | 0 |
| 4930488B22Rik | chr1:186536375-186542868 | 0 | 0 |
| Hlx           | chr1:186551023-186556372 | 0 | 0 |
| Mosc1         | chr1:186610645-186635192 | 0 | 0 |
| Mir1981       | chr1:186646285-186646367 | 0 | 0 |
| Snora36b      | chr1:187066804-187066917 | 0 | 0 |
| Mir664        | chr1:187066853-187066922 | 0 | 0 |
| Mir194-1      | chr1:187137197-187137264 | 0 | 0 |
| Mir215        | chr1:187137459-187137570 | 0 | 0 |
| Gm2061        | chr1:187270994-187279447 | 0 | 0 |
| 5033404E19Rik | chr1:187321184-187321893 | 0 | 0 |
| D1Pas1        | chr1:188791294-188794506 | 0 | 0 |
| Kcnk2         | chr1:191031808-191168071 | 0 | 0 |
| Mir3473c      | chr1:193822434-193822515 | 0 | 0 |
| 1700065J18Rik | chr1:194667898-194668933 | 0 | 0 |
| Mir205        | chr1:195333656-195333724 | 0 | 0 |
| 4930503O07Rik | chr1:196038380-196048953 | 0 | 0 |
| Mir29b-2      | chr1:196863233-196863314 | 0 | 0 |
| Mir29c        | chr1:196863740-196863828 | 0 | 0 |
| Vip           | chr10:4698926-4707323    | 0 | 0 |

|               |                         |   |   |
|---------------|-------------------------|---|---|
| Myct1         | chr10:4739751-4752813   | 0 | 0 |
| lyd           | chr10:6791663-6806262   | 0 | 0 |
| B020014A21Rik | chr10:7213347-7221452   | 0 | 0 |
| Mir5104       | chr10:7556178-7556272   | 0 | 0 |
| Gm6150        | chr10:9404519-9411707   | 0 | 0 |
| Gm5177        | chr10:10325742-10336111 | 0 | 0 |
| 4930567K20Rik | chr10:10470843-10477929 | 0 | 0 |
| 1700016L04Rik | chr10:14425414-14478825 | 0 | 0 |
| Nmbr          | chr10:14480094-14490362 | 0 | 0 |
| Olig3         | chr10:19076344-19078410 | 0 | 0 |
| ll22ra2       | chr10:19341833-19354487 | 0 | 0 |
| Pde7b         | chr10:20117809-20444874 | 0 | 0 |
| Aldh8a1       | chr10:21097105-21116384 | 0 | 0 |
| 1700020N01Rik | chr10:21312950-21342181 | 0 | 0 |
| Gm5420        | chr10:21410650-21413784 | 0 | 0 |
| H60b          | chr10:21993279-22008654 | 0 | 0 |
| C920009B18Rik | chr10:22026525-22032748 | 0 | 0 |
| Tcf21         | chr10:22537078-22539934 | 0 | 0 |
| Snord100      | chr10:23505559-23505627 | 0 | 0 |
| Taar1         | chr10:23640211-23641210 | 0 | 0 |
| Taar2         | chr10:23658377-23661389 | 0 | 0 |
| Taar3         | chr10:23669363-23670395 | 0 | 0 |
| Taar4         | chr10:23680299-23681343 | 0 | 0 |
| Taar5         | chr10:23690511-23691525 | 0 | 0 |
| Taar6         | chr10:23704414-23705452 | 0 | 0 |
| Taar7a        | chr10:23712210-23713287 | 0 | 0 |
| Taar7b        | chr10:23719744-23720821 | 0 | 0 |
| Taar7d        | chr10:23747027-23748104 | 0 | 0 |
| Taar7e        | chr10:23757419-23758496 | 0 | 0 |
| Taar7f        | chr10:23769315-23770392 | 0 | 0 |
| Taar8a        | chr10:23796305-23797340 | 0 | 0 |
| Taar8b        | chr10:23811065-23812100 | 0 | 0 |
| Taar8c        | chr10:23820648-23821757 | 0 | 0 |
| Taar9         | chr10:23828293-23829340 | 0 | 0 |
| 2010003K15Rik | chr10:25247748-25256078 | 0 | 0 |
| 4930401C15Rik | chr10:25499119-25557243 | 0 | 0 |
| Gm9767        | chr10:25798060-25799253 | 0 | 0 |
| Gm8709        | chr10:26393251-26394457 | 0 | 0 |
| 2310057J18Rik | chr10:28692093-28706112 | 0 | 0 |
| Rspo3         | chr10:29172912-29255673 | 0 | 0 |
| Hey2          | chr10:30552164-30562589 | 0 | 0 |
| Nkain2        | chr10:31409124-32609721 | 0 | 0 |
| Trdn          | chr10:32803288-33196515 | 0 | 0 |
| D830005E20Rik | chr10:32942150-32976163 | 0 | 0 |
| Clvs2         | chr10:33232139-33344406 | 0 | 0 |
| Gm4794        | chr10:33486229-33501921 | 0 | 0 |
| Sult3a1       | chr10:33577527-33599281 | 0 | 0 |
| Bet3l         | chr10:33757402-33829621 | 0 | 0 |
| Fam26d        | chr10:33758589-33764119 | 0 | 0 |
| Fam26f        | chr10:33845872-33847778 | 0 | 0 |
| Rfpl4b        | chr10:38540346-38541585 | 0 | 0 |
| AI317395      | chr10:39721378-39745074 | 0 | 0 |

|               |                         |
|---------------|-------------------------|
| Slc22a16      | chr10:40290167-40323938 |
| 9030224M15Rik | chr10:40403087-40530889 |
| Gpr6          | chr10:40790298-40791390 |
| 5730435O14Rik | chr10:41287821-41296282 |
| Nr2e1         | chr10:42281776-42303394 |
| Speer5-ps1    | chr10:43890252-43939391 |
| Mir1929       | chr10:44079481-44079574 |
| Bves          | chr10:45055567-45089514 |
| D030045P18Rik | chr10:45527509-45571824 |
| C130030K03Rik | chr10:48813486-48815649 |
| Grik2         | chr10:48819268-49508560 |
| Sim1          | chr10:50615456-50708958 |
| Fam162b       | chr10:51305255-51310266 |
| Gprc6a        | chr10:51334628-51351264 |
| Rfx6          | chr10:51397565-51450235 |
| 4933411G06Rik | chr10:51475979-51477000 |
| Vgll2         | chr10:51742491-51748277 |
| Gm16998       | chr10:53795727-53800887 |
| 4933403O03Rik | chr10:57692726-57694761 |
| Dux           | chr10:57693398-57695423 |
| Gm4981        | chr10:57697595-57699408 |
| BB019430      | chr10:58159492-58167025 |
| Pla2g12b      | chr10:58866432-58884724 |
| Oit3          | chr10:58885707-58904527 |
| Gm17455       | chr10:59862473-59866306 |
| 4930565A17    | chr10:60494050-60500828 |
| Tbata         | chr10:60634711-60651589 |
| Prf1          | chr10:60760583-60767011 |
| Npffr1        | chr10:61058231-61089133 |
| Mir5108       | chr10:61237484-61237569 |
| Col13a1       | chr10:61301245-61441856 |
| Neurog3       | chr10:61595837-61597511 |
| Hkdc1         | chr10:61845884-61885205 |
| Atoh7         | chr10:62562903-62563353 |
| Mypn          | chr10:62578542-62666700 |
| Ctnna3        | chr10:62892845-64466415 |
| Lrrtm3        | chr10:63391244-63553003 |
| 1700023F02Rik | chr10:65583356-65586812 |
| Rtkn2         | chr10:67442345-67506612 |
| 4930545H06Rik | chr10:67781812-67783890 |
| Tmem26        | chr10:68186493-68245402 |
| C730027H18Rik | chr10:70631484-70644788 |
| 1700049L16Rik | chr10:71442632-71443438 |
| Gm5779        | chr10:74814799-74815706 |
| Ggt1          | chr10:75036337-75048927 |
| Ggt5          | chr10:75052125-75079713 |
| Gstt4         | chr10:75277688-75285288 |
| Gm5134        | chr10:75417258-75472334 |
| Slc5a4b       | chr10:75521365-75573763 |
| Mir678        | chr10:75670070-75670154 |
| Ftcd          | chr10:76038392-76053083 |
| Gm10787       | chr10:76474739-76484959 |

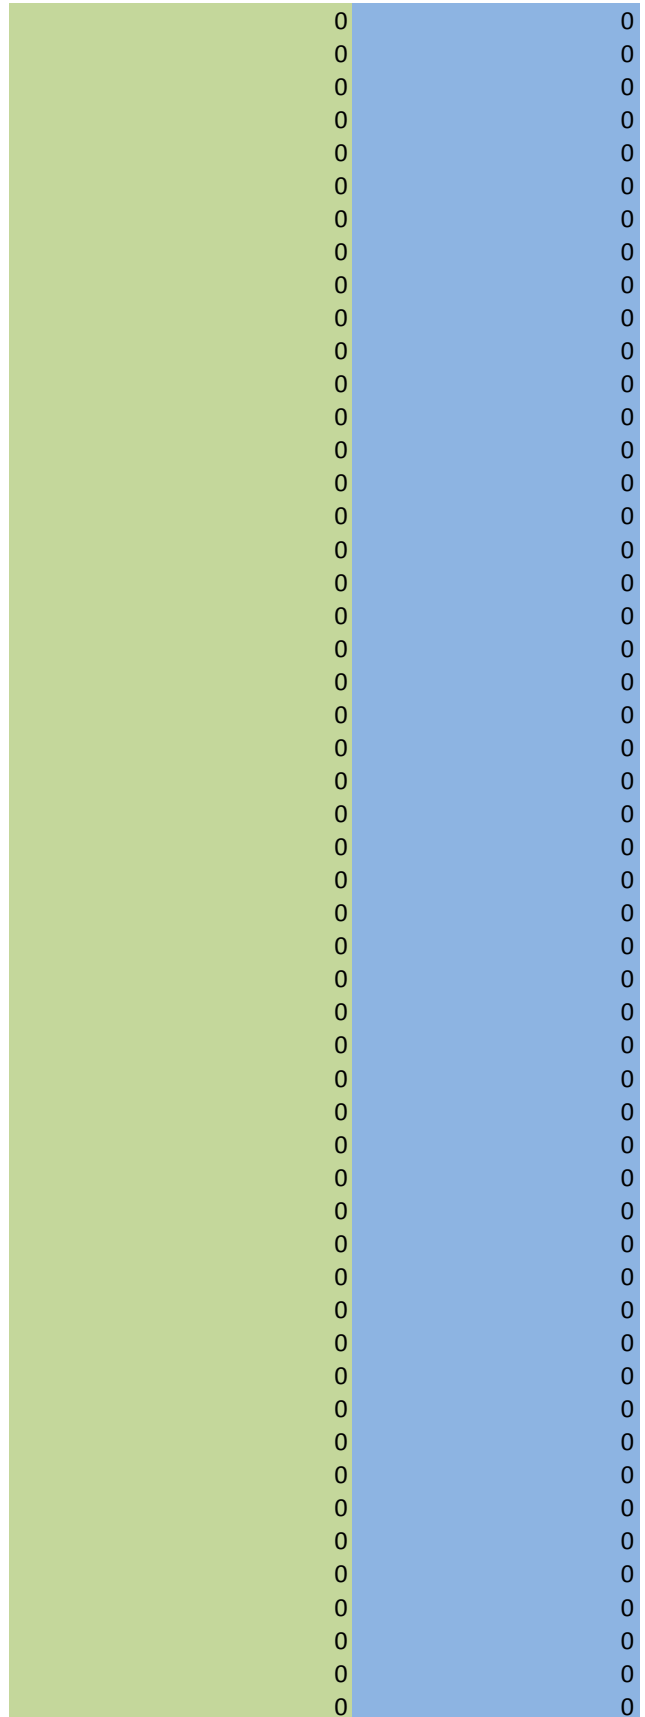

|               |                         |   |   |
|---------------|-------------------------|---|---|
| Mir1930       | chr10:77103968-77104052 | 0 | 0 |
| Gm19402       | chr10:77152701-77153502 | 0 | 0 |
| Gm10272       | chr10:77169331-77169731 | 0 | 0 |
| Gm10142       | chr10:77178551-77178914 | 0 | 0 |
| Krtap12-1     | chr10:77183330-77184001 | 0 | 0 |
| Gm10100       | chr10:77189230-77189593 | 0 | 0 |
| Gm3238        | chr10:77233377-77234070 | 0 | 0 |
| Gm19668       | chr10:77261131-77261878 | 0 | 0 |
| Gm2696        | chr10:77277426-77278149 | 0 | 0 |
| Krtap10-10    | chr10:77298691-77299996 | 0 | 0 |
| Gm10318       | chr10:77315603-77316533 | 0 | 0 |
| Gm3285        | chr10:77324719-77325383 | 0 | 0 |
| 1700009J07Rik | chr10:77356164-77358856 | 0 | 0 |
| Trpm2         | chr10:77370466-77432617 | 0 | 0 |
| Dnmt3l        | chr10:77505031-77526360 | 0 | 0 |
| Olfr1357      | chr10:78074413-78080819 | 0 | 0 |
| Ccdc105       | chr10:78209668-78215812 | 0 | 0 |
| Slc1a6        | chr10:78243240-78277570 | 0 | 0 |
| Olfr1356      | chr10:78309695-78310658 | 0 | 0 |
| Olfr1355      | chr10:78338293-78342851 | 0 | 0 |
| Olfr1354      | chr10:78379586-78380681 | 0 | 0 |
| Olfr8         | chr10:78417951-78418884 | 0 | 0 |
| Olfr1352      | chr10:78443794-78447466 | 0 | 0 |
| Vmn2r80       | chr10:78611560-78657678 | 0 | 0 |
| Vmn2r81       | chr10:78710521-78757280 | 0 | 0 |
| Vmn2r82       | chr10:78819335-78859511 | 0 | 0 |
| Theg          | chr10:79039221-79049881 | 0 | 0 |
| Prtn3         | chr10:79342411-79345917 | 0 | 0 |
| Elane         | chr10:79349056-79350961 | 0 | 0 |
| Onecut3       | chr10:79957650-79980005 | 0 | 0 |
| Atp8b3        | chr10:79982329-80001869 | 0 | 0 |
| Jsrp1         | chr10:80271240-80276243 | 0 | 0 |
| Mir1982       | chr10:80291541-80291615 | 0 | 0 |
| Diras1        | chr10:80482334-80488122 | 0 | 0 |
| Creb3l3       | chr10:80547077-80561617 | 0 | 0 |
| Snord37       | chr10:80641705-80641758 | 0 | 0 |
| Mir3057       | chr10:80734341-80734432 | 0 | 0 |
| S1pr4         | chr10:80960489-80962882 | 0 | 0 |
| Gm1553        | chr10:81949277-81955363 | 0 | 0 |
| Rfx4          | chr10:84218792-84369283 | 0 | 0 |
| Pah           | chr10:86984539-87046882 | 0 | 0 |
| Mybpc1        | chr10:87981023-88067897 | 0 | 0 |
| Spic          | chr10:88138014-88145768 | 0 | 0 |
| Ano4          | chr10:88411738-88720535 | 0 | 0 |
| Nr1h4         | chr10:88916978-88996367 | 0 | 0 |
| Mir135a-2     | chr10:91534830-91534930 | 0 | 0 |
| Mir1251       | chr10:91599884-91599968 | 0 | 0 |
| Gm17745       | chr10:92798976-92811624 | 0 | 0 |
| Mir331        | chr10:93426512-93426608 | 0 | 0 |
| Gm4792        | chr10:93756407-93761448 | 0 | 0 |
| Mir3058       | chr10:95021864-95021955 | 0 | 0 |
| Mir3966       | chr10:96886111-96886196 | 0 | 0 |

|               |                           |   |   |
|---------------|---------------------------|---|---|
| Lum           | chr10:97028134-97035337   | 0 | 0 |
| 4930473O22Rik | chr10:97053617-97059565   | 0 | 0 |
| Kera          | chr10:97069838-97076322   | 0 | 0 |
| Epyc          | chr10:97106701-97144534   | 0 | 0 |
| Gm10754       | chr10:97144047-97429724   | 0 | 0 |
| Gm8633        | chr10:97762560-97814501   | 0 | 0 |
| Gm20110       | chr10:99071804-99120768   | 0 | 0 |
| Gm18409       | chr10:99101364-99104554   | 0 | 0 |
| 1700017N19Rik | chr10:100055019-100081025 | 0 | 0 |
| Mgat4c        | chr10:101144120-101854102 | 0 | 0 |
| Mir3059       | chr10:101235325-101235406 | 0 | 0 |
| Nts           | chr10:101944389-101953052 | 0 | 0 |
| Alx1          | chr10:102470480-102491411 | 0 | 0 |
| Slc6a15       | chr10:102830441-102882013 | 0 | 0 |
| Gm4340        | chr10:103605568-103625055 | 0 | 0 |
| Lin7a         | chr10:106708886-106862199 | 0 | 0 |
| Myf5          | chr10:106919963-106923190 | 0 | 0 |
| Myf6          | chr10:106929915-106931785 | 0 | 0 |
| Otogl         | chr10:107199365-107349190 | 0 | 0 |
| 9230102K24Rik | chr10:110037705-110053017 | 0 | 0 |
| 1700020G17Rik | chr10:110238229-110333563 | 0 | 0 |
| 4933440J02Rik | chr10:111023774-111031329 | 0 | 0 |
| LOC629206     | chr10:111291576-111311432 | 0 | 0 |
| Glpr1l1       | chr10:111497244-111515566 | 0 | 0 |
| Glpr1l2       | chr10:111520409-111545154 | 0 | 0 |
| 1700010J16Rik | chr10:112163981-112222655 | 0 | 0 |
| Trhde         | chr10:113835876-114238426 | 0 | 0 |
| Tph2          | chr10:114515696-114622078 | 0 | 0 |
| Ptprr         | chr10:115455418-115711985 | 0 | 0 |
| 4933416C03Rik | chr10:115548719-115550973 | 0 | 0 |
| Ptprb         | chr10:115738429-115826594 | 0 | 0 |
| 1700030O20Rik | chr10:116160122-116166233 | 0 | 0 |
| 9530003J23Rik | chr10:116670808-116675737 | 0 | 0 |
| 4933411E08Rik | chr10:117362514-117385363 | 0 | 0 |
| Il22          | chr10:117642019-117647102 | 0 | 0 |
| Iltifb        | chr10:117726685-117732094 | 0 | 0 |
| lfng          | chr10:117878102-117882948 | 0 | 0 |
| 1700064J06Rik | chr10:118529960-118540163 | 0 | 0 |
| 1700025F24Rik | chr10:118850499-118863920 | 0 | 0 |
| 9230105E05Rik | chr10:119826578-119829849 | 0 | 0 |
| Mir763        | chr10:119885046-119885166 | 0 | 0 |
| 4921513I03Rik | chr10:120202787-120215942 | 0 | 0 |
| Avpr1a        | chr10:121885554-121890509 | 0 | 0 |
| Mirlet7i      | chr10:122422695-122422780 | 0 | 0 |
| Fam19a2       | chr10:122701131-123178260 | 0 | 0 |
| Mir26a-2      | chr10:126432585-126432669 | 0 | 0 |
| Slc26a10      | chr10:126609481-126617701 | 0 | 0 |
| Inhbc         | chr10:126793381-126807600 | 0 | 0 |
| Tac2          | chr10:127161533-127168824 | 0 | 0 |
| Rdh16         | chr10:127238208-127252895 | 0 | 0 |
| Rdh18-ps      | chr10:127261271-127283621 | 0 | 0 |
| Rdh19         | chr10:127286983-127298232 | 0 | 0 |

|          |                           |   |   |
|----------|---------------------------|---|---|
| BC089597 | chr10:127303531-127314375 | 0 | 0 |
| Rdh7     | chr10:127321082-127325789 | 0 | 0 |
| Hsd17b6  | chr10:127427991-127444564 | 0 | 0 |
| Mir677   | chr10:127522341-127522419 | 0 | 0 |
| Apon     | chr10:127691186-127692957 | 0 | 0 |
| Itga7    | chr10:128370868-128395340 | 0 | 0 |
| Mettl7b  | chr10:128395332-128398044 | 0 | 0 |
| Olf9     | chr10:128426969-128427908 | 0 | 0 |
| Olf9     | chr10:128448342-128449272 | 0 | 0 |
| Olf9     | chr10:128483187-128484117 | 0 | 0 |
| Olf9     | chr10:128516087-128517017 | 0 | 0 |
| Olf9     | chr10:128530089-128531028 | 0 | 0 |
| Olf9     | chr10:128548540-128549479 | 0 | 0 |
| Olf9     | chr10:128569886-128570822 | 0 | 0 |
| Olf9     | chr10:128597084-128598038 | 0 | 0 |
| Olf9     | chr10:128611106-128612110 | 0 | 0 |
| Olf9     | chr10:128623539-128624475 | 0 | 0 |
| Olf9     | chr10:128675206-128676145 | 0 | 0 |
| Olf9     | chr10:128687591-128688530 | 0 | 0 |
| Olf9     | chr10:128698018-128698957 | 0 | 0 |
| Olf9     | chr10:128705441-128706377 | 0 | 0 |
| Olf9     | chr10:128758680-128759619 | 0 | 0 |
| Olf9     | chr10:128769938-128770874 | 0 | 0 |
| Olf9     | chr10:128787620-128788565 | 0 | 0 |
| Olf9     | chr10:128824690-128825650 | 0 | 0 |
| Olf9     | chr10:128873869-128874808 | 0 | 0 |
| Olf9     | chr10:128899733-128900672 | 0 | 0 |
| Olf9     | chr10:128909749-128910685 | 0 | 0 |
| Olf9     | chr10:128937941-128938910 | 0 | 0 |
| Olf9     | chr10:128963284-128964223 | 0 | 0 |
| Olf9     | chr10:128977594-128978530 | 0 | 0 |
| Olf9     | chr10:129007712-129008675 | 0 | 0 |
| Olf9     | chr10:129044602-129045535 | 0 | 0 |
| Olf9     | chr10:129062179-129063115 | 0 | 0 |
| Olf9     | chr10:129084185-129085121 | 0 | 0 |
| Olf9     | chr10:129096863-129097799 | 0 | 0 |
| Mir684-1 | chr10:129102810-129102895 | 0 | 0 |
| Olf9     | chr10:129106616-129107573 | 0 | 0 |
| Olf9     | chr10:129118854-129119793 | 0 | 0 |
| Olf9     | chr10:129128168-129129095 | 0 | 0 |
| Olf9     | chr10:129141935-129142880 | 0 | 0 |
| Olf9     | chr10:129159638-129160598 | 0 | 0 |
| Olf9     | chr10:129175029-129175971 | 0 | 0 |
| Olf9     | chr10:129191568-129192504 | 0 | 0 |
| Olf9     | chr10:129204553-129205492 | 0 | 0 |
| Olf9     | chr10:129212926-129213913 | 0 | 0 |
| Olf9     | chr10:129227704-129228643 | 0 | 0 |
| Olf9     | chr10:129238619-129239579 | 0 | 0 |
| Olf9     | chr10:129279163-129280096 | 0 | 0 |
| Olf9     | chr10:129293575-129294508 | 0 | 0 |
| Olf9     | chr10:129310878-129311811 | 0 | 0 |
| Olf9     | chr10:129338831-129339782 | 0 | 0 |

|               |                           |   |   |
|---------------|---------------------------|---|---|
| Olf816        | chr10:129348393-129349332 | 0 | 0 |
| Olf818        | chr10:129382159-129383116 | 0 | 0 |
| Olf819        | chr10:129402791-129403754 | 0 | 0 |
| Olf247        | chr10:129411660-129412605 | 0 | 0 |
| Olf247        | chr10:129420535-129421480 | 0 | 0 |
| Olf820        | chr10:129454418-129455357 | 0 | 0 |
| Olf821        | chr10:129470683-129471616 | 0 | 0 |
| Olf822        | chr10:129511467-129512406 | 0 | 0 |
| Olf823        | chr10:129548896-129549844 | 0 | 0 |
| Olf824        | chr10:129563163-129564111 | 0 | 0 |
| Olf825        | chr10:129599417-129600380 | 0 | 0 |
| Olf826        | chr10:129616992-129617934 | 0 | 0 |
| Olf827        | chr10:129647215-129648184 | 0 | 0 |
| Neurod4       | chr10:129705207-129717296 | 0 | 0 |
| 5830405N20Rik | chr10:129759907-129799698 | 0 | 0 |
| Vmn2r87       | chr10:129908876-129934435 | 0 | 0 |
| Mtfp1         | chr11:3991483-3995434     | 0 | 0 |
| Mir3060       | chr11:4039366-4039449     | 0 | 0 |
| Cabp7         | chr11:4638823-4646781     | 0 | 0 |
| Ankrd36       | chr11:5469686-5589340     | 0 | 0 |
| Snora5c       | chr11:6520321-6520422     | 0 | 0 |
| Wap           | chr11:6535485-6538652     | 0 | 0 |
| Gm11978       | chr11:6550150-6560239     | 0 | 0 |
| Gm11985       | chr11:7083159-7088572     | 0 | 0 |
| 4930415F15Rik | chr11:11389268-11415193   | 0 | 0 |
| 1700042O10Rik | chr11:11768125-11785324   | 0 | 0 |
| 1700046C09Rik | chr11:14460338-14499228   | 0 | 0 |
| Pom121I12     | chr11:14499242-14500319   | 0 | 0 |
| 2810442I21Rik | chr11:16836725-16851096   | 0 | 0 |
| Fbxo48        | chr11:16851412-16854775   | 0 | 0 |
| Cnrip1        | chr11:16951936-16979375   | 0 | 0 |
| 4933406G16Rik | chr11:18965277-18975743   | 0 | 0 |
| Mir1933       | chr11:21244590-21244678   | 0 | 0 |
| 4932414J04Rik | chr11:21394732-21411183   | 0 | 0 |
| 4933430M04Rik | chr11:24381908-24469951   | 0 | 0 |
| Gm10466       | chr11:24621005-24630722   | 0 | 0 |
| 4933427E13Rik | chr11:25226106-25267137   | 0 | 0 |
| Ccdc85a       | chr11:28285691-28484296   | 0 | 0 |
| 2810471M01Rik | chr11:28581563-28593276   | 0 | 0 |
| Mir216b       | chr11:28646190-28646276   | 0 | 0 |
| Mir216a       | chr11:28657011-28657083   | 0 | 0 |
| Mir217        | chr11:28663727-28663835   | 0 | 0 |
| Hba-x         | chr11:32176599-32178115   | 0 | 0 |
| Hba-a1        | chr11:32183671-32184486   | 0 | 0 |
| Hba-a2        | chr11:32183674-32184493   | 0 | 0 |
| Hbq1b         | chr11:32186963-32187912   | 0 | 0 |
| Hba-a1        | chr11:32196488-32197303   | 0 | 0 |
| Hba-a2        | chr11:32196491-32197310   | 0 | 0 |
| Hbq1a         | chr11:32200068-32200873   | 0 | 0 |
| 1700008A04Rik | chr11:32720375-32724594   | 0 | 0 |
| Tlx3          | chr11:33100751-33103588   | 0 | 0 |
| Kcnip1        | chr11:33529340-33893193   | 0 | 0 |

|               |                         |   |   |
|---------------|-------------------------|---|---|
| Mir218-2      | chr11:35430317-35430427 | 0 | 0 |
| Mir103-1      | chr11:35595897-35595983 | 0 | 0 |
| Fbll1         | chr11:35610881-35612386 | 0 | 0 |
| Gm12130       | chr11:38305049-38333547 | 0 | 0 |
| Gabrg2        | chr11:41723696-41814180 | 0 | 0 |
| Gabra6        | chr11:42119938-42134553 | 0 | 0 |
| Mir146        | chr11:43187898-43187963 | 0 | 0 |
| Gm12159       | chr11:44916367-44930430 | 0 | 0 |
| F630206G17Rik | chr11:45621584-45656380 | 0 | 0 |
| Sox30         | chr11:45793811-45831494 | 0 | 0 |
| Itk           | chr11:46138651-46203017 | 0 | 0 |
| Fam71b        | chr11:46218231-46221484 | 0 | 0 |
| Gm12169       | chr11:46337752-46351658 | 0 | 0 |
| Gm12171       | chr11:46361914-46369570 | 0 | 0 |
| BC053393      | chr11:46385014-46402734 | 0 | 0 |
| Dppa1         | chr11:46420511-46442776 | 0 | 0 |
| Gm4926        | chr11:46450007-46458508 | 0 | 0 |
| Timd2         | chr11:46482461-46520606 | 0 | 0 |
| Havcr1        | chr11:46553724-46593080 | 0 | 0 |
| Timd4         | chr11:46624300-46657835 | 0 | 0 |
| Snord96a      | chr11:48615534-48615611 | 0 | 0 |
| Snord95       | chr11:48616640-48616708 | 0 | 0 |
| Olfr56        | chr11:48864234-48948889 | 0 | 0 |
| Olfr1396      | chr11:48926278-48927259 | 0 | 0 |
| Olfr1395      | chr11:48961760-48962714 | 0 | 0 |
| Olfr1394      | chr11:48973517-48974456 | 0 | 0 |
| Btnl9         | chr11:48981826-49000591 | 0 | 0 |
| Olfr1391      | chr11:49140914-49141850 | 0 | 0 |
| Olfr1390      | chr11:49154035-49154971 | 0 | 0 |
| Olfr1389      | chr11:49243928-49245001 | 0 | 0 |
| Olfr1388      | chr11:49257354-49258290 | 0 | 0 |
| Olfr1387      | chr11:49273182-49274118 | 0 | 0 |
| Olfr1386      | chr11:49283555-49284683 | 0 | 0 |
| Olfr1385      | chr11:49308036-49308966 | 0 | 0 |
| Olfr1384      | chr11:49327119-49328153 | 0 | 0 |
| Olfr1383      | chr11:49337226-49338162 | 0 | 0 |
| Rasgef1c      | chr11:49715336-49793725 | 0 | 0 |
| Mir340        | chr11:49883203-49883301 | 0 | 0 |
| Mir804        | chr11:50171286-50171381 | 0 | 0 |
| Prop1         | chr11:50764307-50767134 | 0 | 0 |
| Olfr1378      | chr11:50782521-50783469 | 0 | 0 |
| Olfr1377      | chr11:50798204-50799128 | 0 | 0 |
| Olfr51        | chr11:50820475-50821399 | 0 | 0 |
| Olfr54        | chr11:50840505-50841447 | 0 | 0 |
| 9230009I02Rik | chr11:50898588-50905337 | 0 | 0 |
| Mir3061       | chr11:51940247-51940338 | 0 | 0 |
| Il4           | chr11:53425962-53432167 | 0 | 0 |
| Il13          | chr11:53444824-53448204 | 0 | 0 |
| Il5           | chr11:53534295-53538605 | 0 | 0 |
| Csf2          | chr11:54060771-54063401 | 0 | 0 |
| Il3           | chr11:54078586-54080781 | 0 | 0 |
| 4930404A10Rik | chr11:54184153-54240257 | 0 | 0 |



|               |                         |   |   |
|---------------|-------------------------|---|---|
| LOC432562     | chr11:54633420-54638469 | 0 | 0 |
| Slc36a3       | chr11:54938324-54965208 | 0 | 0 |
| Nmur2         | chr11:55838491-55854489 | 0 | 0 |
| Gria1         | chr11:56825119-57143746 | 0 | 0 |
| Hand1         | chr11:57642214-57645649 | 0 | 0 |
| 1810065E05Rik | chr11:58234612-58239525 | 0 | 0 |
| Gm12253       | chr11:58246060-58255124 | 0 | 0 |
| 4930504O13Rik | chr11:58259644-58266468 | 0 | 0 |
| Olfr30        | chr11:58268416-58269482 | 0 | 0 |
| Olfr332       | chr11:58303220-58306001 | 0 | 0 |
| Olfr331       | chr11:58315099-58316056 | 0 | 0 |
| Olfr330       | chr11:58342430-58348327 | 0 | 0 |
| Olfr329-ps    | chr11:58355948-58358440 | 0 | 0 |
| Olfr328       | chr11:58364806-58365739 | 0 | 0 |
| Olfr224       | chr11:58379900-58380845 | 0 | 0 |
| Olfr325       | chr11:58394338-58395379 | 0 | 0 |
| Olfr324       | chr11:58410846-58411968 | 0 | 0 |
| 2210407C18Rik | chr11:58421707-58426994 | 0 | 0 |
| Olfr323       | chr11:58438574-58439546 | 0 | 0 |
| Trim58        | chr11:58453966-58465906 | 0 | 0 |
| Olfr179       | chr11:58479062-58480046 | 0 | 0 |
| Olfr320       | chr11:58497376-58498297 | 0 | 0 |
| Olfr319       | chr11:58515204-58516125 | 0 | 0 |
| Olfr318       | chr11:58533570-58534596 | 0 | 0 |
| Olfr317       | chr11:58545597-58546725 | 0 | 0 |
| Olfr316       | chr11:58571168-58572089 | 0 | 0 |
| Olfr314       | chr11:58599640-58600771 | 0 | 0 |
| Olfr313       | chr11:58630429-58631503 | 0 | 0 |
| Olfr312       | chr11:58644657-58645584 | 0 | 0 |
| Olfr311       | chr11:58654617-58655544 | 0 | 0 |
| Butr1         | chr11:58731558-58740467 | 0 | 0 |
| Prss38        | chr11:59186170-59189155 | 0 | 0 |
| Olfr222       | chr11:59384283-59385240 | 0 | 0 |
| Olfr223       | chr11:59402629-59403589 | 0 | 0 |
| Olfr225       | chr11:59426467-59427727 | 0 | 0 |
| Mir5100       | chr11:60542164-60542228 | 0 | 0 |
| Kcnj12        | chr11:60879305-60884633 | 0 | 0 |
| Slc47a2       | chr11:61115132-61156362 | 0 | 0 |
| Slc47a1       | chr11:61156901-61191577 | 0 | 0 |
| Snord49b      | chr11:62416587-62416650 | 0 | 0 |
| Snord49a      | chr11:62416961-62417023 | 0 | 0 |
| Snord65       | chr11:62418031-62418088 | 0 | 0 |
| Cdrt4         | chr11:62764694-62806597 | 0 | 0 |
| Myocd         | chr11:64990071-65083491 | 0 | 0 |
| Gm12295       | chr11:65091155-65101335 | 0 | 0 |
| Mir744        | chr11:65548234-65548334 | 0 | 0 |
| 2310065F04Rik | chr11:66925962-66933582 | 0 | 0 |
| Myh8          | chr11:67090625-67122135 | 0 | 0 |
| Dhrs7c        | chr11:67611772-67629504 | 0 | 0 |
| Pik3r6        | chr11:68316520-68366200 | 0 | 0 |
| Ccdc42        | chr11:68400538-68411453 | 0 | 0 |
| Odf4          | chr11:68735336-68740583 | 0 | 0 |



|               |                         |   |   |
|---------------|-------------------------|---|---|
| Olf412        | chr11:74178172-74179111 | 0 | 0 |
| Snord91a      | chr11:74718947-74719007 | 0 | 0 |
| Mir684-1      | chr11:74879408-74879493 | 0 | 0 |
| Mir212        | chr11:74986889-74986980 | 0 | 0 |
| Mir132        | chr11:74987183-74987249 | 0 | 0 |
| Mir22         | chr11:75277217-75277312 | 0 | 0 |
| Mir3971       | chr11:75364930-75365013 | 0 | 0 |
| Tusc5         | chr11:76493374-76512166 | 0 | 0 |
| Tmigd1        | chr11:76718046-76730088 | 0 | 0 |
| Mir423        | chr11:76891565-76891674 | 0 | 0 |
| Mir144        | chr11:77886506-77886572 | 0 | 0 |
| Mir451        | chr11:77886671-77886743 | 0 | 0 |
| Snord42a      | chr11:77994803-77994848 | 0 | 0 |
| Snord4a       | chr11:77995188-77995258 | 0 | 0 |
| Snord42b      | chr11:77996560-77996615 | 0 | 0 |
| Gm11194       | chr11:78207986-78219159 | 0 | 0 |
| Sebox         | chr11:78317014-78318584 | 0 | 0 |
| Mir193        | chr11:79525470-79525536 | 0 | 0 |
| Mir365-2      | chr11:79539901-79540013 | 0 | 0 |
| Spaca3        | chr11:80671890-80681316 | 0 | 0 |
| Accn1         | chr11:80693666-81781898 | 0 | 0 |
| 1700071K01Rik | chr11:81386003-81387041 | 0 | 0 |
| 5530401A14Rik | chr11:81674178-81708084 | 0 | 0 |
| Ccl2          | chr11:81849078-81850954 | 0 | 0 |
| Ccl7          | chr11:81859213-81861025 | 0 | 0 |
| Ccl11         | chr11:81871333-81876457 | 0 | 0 |
| Ccl12         | chr11:81915346-81916901 | 0 | 0 |
| Ccl8          | chr11:81928686-81930301 | 0 | 0 |
| Gm11426       | chr11:82446854-82449811 | 0 | 0 |
| Fndc8         | chr11:82705646-82714239 | 0 | 0 |
| Unc45b        | chr11:82724754-82756908 | 0 | 0 |
| 1700003F17Rik | chr11:82755842-82774183 | 0 | 0 |
| Slfn1         | chr11:82930346-82936161 | 0 | 0 |
| Slfn3         | chr11:83004831-83028656 | 0 | 0 |
| Snord7        | chr11:83107805-83107901 | 0 | 0 |
| Ccl4          | chr11:83476085-83478185 | 0 | 0 |
| Gm11428       | chr11:83517557-83519771 | 0 | 0 |
| Lhx1          | chr11:84332880-84339036 | 0 | 0 |
| 1500016L03Rik | chr11:84339161-84349333 | 0 | 0 |
| 1700109G15Rik | chr11:84530477-84533934 | 0 | 0 |
| Car4          | chr11:84771255-84779556 | 0 | 0 |
| Tbx4          | chr11:85703564-85729599 | 0 | 0 |
| Mir21         | chr11:86397568-86397660 | 0 | 0 |
| Mir301        | chr11:86926505-86926591 | 0 | 0 |
| Mir142        | chr11:87570365-87570429 | 0 | 0 |
| Mpo           | chr11:87607285-87617914 | 0 | 0 |
| Lpo           | chr11:87619929-87639616 | 0 | 0 |
| Epx           | chr11:87677499-87689038 | 0 | 0 |
| Olf462        | chr11:87702460-87703396 | 0 | 0 |
| Olf463        | chr11:87706488-87707424 | 0 | 0 |
| Olf464        | chr11:87727421-87728505 | 0 | 0 |
| Mir378b       | chr11:88166274-88166366 | 0 | 0 |

|               |                         |   |   |
|---------------|-------------------------|---|---|
| 2210409E12Rik | chr11:88833951-88834328 | 0 | 0 |
| Gm525         | chr11:88935154-88954378 | 0 | 0 |
| Nog           | chr11:89161951-89163873 | 0 | 0 |
| 4930405D11Rik | chr11:90666004-90756466 | 0 | 0 |
| Kif2b         | chr11:91436599-91438869 | 0 | 0 |
| Car10         | chr11:92960603-93463065 | 0 | 0 |
| Gm11541       | chr11:94555811-94565813 | 0 | 0 |
| Gm11545       | chr11:94616449-94622496 | 0 | 0 |
| Tmem92        | chr11:94638530-94693316 | 0 | 0 |
| Gm11544       | chr11:94706144-94710907 | 0 | 0 |
| Col1a1        | chr11:94797583-94813170 | 0 | 0 |
| Hils1         | chr11:94828974-94829770 | 0 | 0 |
| 1110035M17Rik | chr11:95561419-95574068 | 0 | 0 |
| Phospho1      | chr11:95685813-95693454 | 0 | 0 |
| Abi3          | chr11:95691385-95703790 | 0 | 0 |
| Igf2bp1       | chr11:95818477-95867258 | 0 | 0 |
| Mir3063       | chr11:95824605-95824697 | 0 | 0 |
| Gip           | chr11:95885858-95892142 | 0 | 0 |
| Hoxb13        | chr11:96055674-96057913 | 0 | 0 |
| Gm53          | chr11:96112973-96125798 | 0 | 0 |
| Mir196a-1     | chr11:96126477-96126579 | 0 | 0 |
| Hoxb9         | chr11:96132643-96137907 | 0 | 0 |
| Hoxb8         | chr11:96143218-96146639 | 0 | 0 |
| Hoxb7         | chr11:96147959-96151477 | 0 | 0 |
| Hoxb6         | chr11:96160484-96162883 | 0 | 0 |
| Mir10a        | chr11:96178478-96178588 | 0 | 0 |
| Hoxb1         | chr11:96227071-96229567 | 0 | 0 |
| Gm11529       | chr11:96308212-96325861 | 0 | 0 |
| Mir152        | chr11:96711706-96711779 | 0 | 0 |
| Tbx21         | chr11:96959320-96976645 | 0 | 0 |
| Stac2         | chr11:97897937-97914776 | 0 | 0 |
| Mir5119       | chr11:98123919-98123976 | 0 | 0 |
| Neurod2       | chr11:98186730-98190959 | 0 | 0 |
| Tcap          | chr11:98245124-98246267 | 0 | 0 |
| Pnmt          | chr11:98247945-98249411 | 0 | 0 |
| Gm12          | chr11:98459604-98460900 | 0 | 0 |
| Ccr7          | chr11:99005512-99016391 | 0 | 0 |
| Krt26         | chr11:99189797-99199279 | 0 | 0 |
| Krt40         | chr11:99398798-99404472 | 0 | 0 |
| Krtap1-5      | chr11:99441290-99442330 | 0 | 0 |
| Krtap1-3      | chr11:99451776-99452653 | 0 | 0 |
| Krtap4-1      | chr11:99488542-99489553 | 0 | 0 |
| Krtap4-2      | chr11:99495427-99496398 | 0 | 0 |
| Krtap4-7      | chr11:99504425-99505403 | 0 | 0 |
| Gm11563       | chr11:99519255-99520273 | 0 | 0 |
| Krtap4-6      | chr11:99526356-99527274 | 0 | 0 |
| Gm11595       | chr11:99633027-99634227 | 0 | 0 |
| Krtap4-8      | chr11:99641327-99641957 | 0 | 0 |
| Krtap4-9      | chr11:99646513-99647571 | 0 | 0 |
| Gm11596       | chr11:99653988-99654606 | 0 | 0 |
| Krtap4-13     | chr11:99659386-99671210 | 0 | 0 |
| Gm11554       | chr11:99659499-99671206 | 0 | 0 |



|               |                           |   |   |
|---------------|---------------------------|---|---|
| Cygb          | chr11:116506908-116515627 | 0 | 0 |
| Gm11744       | chr11:116518421-116529703 | 0 | 0 |
| Snord1a       | chr11:116535910-116535986 | 0 | 0 |
| Snord1c       | chr11:116533818-116533896 | 0 | 0 |
| Snord1b       | chr11:116535460-116535537 | 0 | 0 |
| 6030468B19Rik | chr11:117658973-117668622 | 0 | 0 |
| Gm11747       | chr11:118305513-118316309 | 0 | 0 |
| Enpp7         | chr11:118849501-118854155 | 0 | 0 |
| Mir1932       | chr11:119251785-119251875 | 0 | 0 |
| Gm11762       | chr11:119409943-119430360 | 0 | 0 |
| Mir338        | chr11:119876078-119876176 | 0 | 0 |
| Mir3065       | chr11:119876080-119876167 | 0 | 0 |
| Npb           | chr11:120469790-120470414 | 0 | 0 |
| Cd7           | chr11:120898062-120900792 | 0 | 0 |
| Tex19.2       | chr11:120977528-120979991 | 0 | 0 |
| Tex19.1       | chr11:121007456-121009627 | 0 | 0 |
| Ptchd3        | chr11:121691531-121704750 | 0 | 0 |
| 1700101O22Rik | chr12:7378844-7387136     | 0 | 0 |
| Matn3         | chr12:8954734-8978834     | 0 | 0 |
| 1700022H16Rik | chr12:9572041-9577391     | 0 | 0 |
| Osr1          | chr12:9581247-9588306     | 0 | 0 |
| Nt5c1b        | chr12:10376776-10396980   | 0 | 0 |
| Msgn1         | chr12:11215187-11215754   | 0 | 0 |
| Gm16497       | chr12:14268339-14292490   | 0 | 0 |
| 4930448C13Rik | chr12:15003194-15057195   | 0 | 0 |
| Ntsr2         | chr12:16660275-16667042   | 0 | 0 |
| Kcnf1         | chr12:17178905-17183694   | 0 | 0 |
| Mir3066       | chr12:17362197-17362280   | 0 | 0 |
| Gm17746       | chr12:25814038-25817139   | 0 | 0 |
| 4930480M12Rik | chr12:26896131-26925572   | 0 | 0 |
| Allc          | chr12:29238619-29267348   | 0 | 0 |
| Colec11       | chr12:29279037-29308155   | 0 | 0 |
| Tpo           | chr12:30739525-30817474   | 0 | 0 |
| Sntg2         | chr12:30859421-31058240   | 0 | 0 |
| 2310016D03Rik | chr12:31095423-31152223   | 0 | 0 |
| Slc26a4       | chr12:32204683-32244834   | 0 | 0 |
| Efcab10       | chr12:34079718-34086134   | 0 | 0 |
| Ferd3l        | chr12:34613289-34614174   | 0 | 0 |
| Prps1l1       | chr12:35669432-35671108   | 0 | 0 |
| Mir680-3      | chr12:35879482-35879569   | 0 | 0 |
| 9130015A21Rik | chr12:36356962-36379790   | 0 | 0 |
| 1700108M19Rik | chr12:36934931-36979985   | 0 | 0 |
| Mir1938       | chr12:40949298-40949398   | 0 | 0 |
| Foxg1         | chr12:50483869-50487854   | 0 | 0 |
| 3110039M20Rik | chr12:50490638-50508333   | 0 | 0 |
| 1810007C17Rik | chr12:50577979-50581849   | 0 | 0 |
| Gpr33         | chr12:53123990-53129050   | 0 | 0 |
| 1700031P21Rik | chr12:53700970-53703309   | 0 | 0 |
| Mir1892       | chr12:55746919-55746999   | 0 | 0 |
| Aldoart2      | chr12:56666121-56667696   | 0 | 0 |
| Gm19990       | chr12:57354229-57367368   | 0 | 0 |
| E030019B13Rik | chr12:57591414-57630407   | 0 | 0 |



|               |                           |   |   |
|---------------|---------------------------|---|---|
| Tcl1b1        | chr12:106397913-106404835 | 0 | 0 |
| Tcl1b5        | chr12:106414567-106419355 | 0 | 0 |
| Tcl1b3        | chr12:106429254-106433609 | 0 | 0 |
| Tcl1b4        | chr12:106440631-106445203 | 0 | 0 |
| Tcl1          | chr12:106454964-106460947 | 0 | 0 |
| Gm2721        | chr12:106633065-106641970 | 0 | 0 |
| 1700121N2ORik | chr12:107680861-107685876 | 0 | 0 |
| 4933406K04Rik | chr12:107923816-107954534 | 0 | 0 |
| 4930465M2ORik | chr12:108961952-108973698 | 0 | 0 |
| Mir345        | chr12:110075182-110075278 | 0 | 0 |
| Meg3          | chr12:110779205-110809939 | 0 | 0 |
| Mir1906-1     | chr12:110782750-110782830 | 0 | 0 |
| Mir770        | chr12:110801901-110801995 | 0 | 0 |
| Mir673        | chr12:110810199-110810290 | 0 | 0 |
| Mir493        | chr12:110818442-110818525 | 0 | 0 |
| Mir337        | chr12:110823998-110824095 | 0 | 0 |
| Mir540        | chr12:110824289-110824356 | 0 | 0 |
| Mir665        | chr12:110824523-110824617 | 0 | 0 |
| Mir3070a      | chr12:110826152-110826241 | 0 | 0 |
| Mir3070b      | chr12:110826801-110826890 | 0 | 0 |
| Rtl1          | chr12:110828378-110833613 | 0 | 0 |
| Mir3071       | chr12:110833527-110833607 | 0 | 0 |
| Mir431        | chr12:110828656-110828747 | 0 | 0 |
| 6430411K18Rik | chr12:110829746-110831063 | 0 | 0 |
| Mir433        | chr12:110829924-110830048 | 0 | 0 |
| Mir127        | chr12:110831055-110831125 | 0 | 0 |
| Mir434        | chr12:110832715-110832809 | 0 | 0 |
| Mir432        | chr12:110833165-110833240 | 0 | 0 |
| Mir136        | chr12:110833536-110833598 | 0 | 0 |
| Rian          | chr12:110842154-110899921 | 0 | 0 |
| Mir341        | chr12:110849709-110849805 | 0 | 0 |
| Mir1188       | chr12:110850031-110850151 | 0 | 0 |
| Mir370        | chr12:110856467-110856546 | 0 | 0 |
| AF357425      | chr12:110874221-110874290 | 0 | 0 |
| AF357426      | chr12:110881047-110881114 | 0 | 0 |
| LOC100861570  | chr12:110887826-110887897 | 0 | 0 |
| AF357359      | chr12:110888918-110888948 | 0 | 0 |
| LOC100861571  | chr12:110889633-110889705 | 0 | 0 |
| AF357355      | chr12:110892836-110892907 | 0 | 0 |
| LOC100861572  | chr12:110894554-110894625 | 0 | 0 |
| Mir882        | chr12:110920406-110920483 | 0 | 0 |
| Mir379        | chr12:110947269-110947335 | 0 | 0 |
| Mir411        | chr12:110948384-110948466 | 0 | 0 |
| Mir299        | chr12:110948847-110948910 | 0 | 0 |
| Mir380        | chr12:110950012-110950073 | 0 | 0 |
| Mir1197       | chr12:110950526-110950646 | 0 | 0 |
| Mir323        | chr12:110950717-110950803 | 0 | 0 |
| Mir758        | chr12:110951019-110951100 | 0 | 0 |
| Mir329        | chr12:110951690-110951787 | 0 | 0 |
| Mir494        | chr12:110953527-110953612 | 0 | 0 |
| Mir679        | chr12:110953786-110953860 | 0 | 0 |
| Mir1193       | chr12:110953880-110954001 | 0 | 0 |



|               |                           |   |   |
|---------------|---------------------------|---|---|
| Mir666        | chr12:110955294-110955393 | 0 | 0 |
| Mir543        | chr12:110955467-110955543 | 0 | 0 |
| Mir495        | chr12:110956963-110957026 | 0 | 0 |
| Mir667        | chr12:110958215-110958307 | 0 | 0 |
| Mir376c       | chr12:110960927-110961012 | 0 | 0 |
| Mir654        | chr12:110961427-110961511 | 0 | 0 |
| Mir376b       | chr12:110961667-110961749 | 0 | 0 |
| Mir376a       | chr12:110961990-110962058 | 0 | 0 |
| Mir300        | chr12:110962522-110962601 | 0 | 0 |
| Mir381        | chr12:110965031-110965106 | 0 | 0 |
| Mir487b       | chr12:110965542-110965624 | 0 | 0 |
| Mir539        | chr12:110966338-110966412 | 0 | 0 |
| Mir382        | chr12:110971980-110972056 | 0 | 0 |
| Mir134        | chr12:110972348-110972419 | 0 | 0 |
| Mir668        | chr12:110972941-110973007 | 0 | 0 |
| Mir485        | chr12:110973111-110973184 | 0 | 0 |
| Mirg          | chr12:110973190-110987667 | 0 | 0 |
| Mir412        | chr12:110981498-110981578 | 0 | 0 |
| Mir369        | chr12:110981627-110981706 | 0 | 0 |
| Mir410        | chr12:110981924-110982005 | 0 | 0 |
| Mir453        | chr12:110973828-110973910 | 0 | 0 |
| Mir154        | chr12:110976642-110976708 | 0 | 0 |
| Mir496        | chr12:110977328-110977407 | 0 | 0 |
| Mir377        | chr12:110978719-110978787 | 0 | 0 |
| Mir541        | chr12:110980618-110980708 | 0 | 0 |
| Mir409        | chr12:110981367-110981446 | 0 | 0 |
| Mir3072       | chr12:110986087-110986170 | 0 | 0 |
| 3110009F21Rik | chr12:111389863-111396283 | 0 | 0 |
| Dio3os        | chr12:111513594-111516278 | 0 | 0 |
| Mir1247       | chr12:111516257-111516339 | 0 | 0 |
| Dio3          | chr12:111517439-111519307 | 0 | 0 |
| A230065H16Rik | chr12:112645019-112650288 | 0 | 0 |
| BC048943      | chr12:113217533-113218962 | 0 | 0 |
| Mir3073       | chr12:113347448-113347533 | 0 | 0 |
| Mir203        | chr12:113369090-113369166 | 0 | 0 |
| A730018C14Rik | chr12:113649233-113661409 | 0 | 0 |
| B020018J22Rik | chr12:113666494-113673549 | 0 | 0 |
| A530016L24Rik | chr12:113727658-113738138 | 0 | 0 |
| Tmem179       | chr12:113738394-113749371 | 0 | 0 |
| Tex22         | chr12:114312712-114327125 | 0 | 0 |
| Adam6b        | chr12:114727775-114730046 | 0 | 0 |
| Adam6a        | chr12:114782118-114784625 | 0 | 0 |
| Gm10421       | chr12:118382995-118389742 | 0 | 0 |
| Mir153        | chr12:118489289-118489358 | 0 | 0 |
| D230030E09Rik | chr12:119756769-119768666 | 0 | 0 |
| Abcb5         | chr12:120106296-120204894 | 0 | 0 |
| Tmem196       | chr12:121184434-121257179 | 0 | 0 |
| Speer6-ps1    | chr13:3148720-3188924     | 0 | 0 |
| 1700024F13Rik | chr13:3497295-3500639     | 0 | 0 |
| Calm5         | chr13:3853418-3854007     | 0 | 0 |
| Tubal3        | chr13:3923940-3934523     | 0 | 0 |
| Akr1c19       | chr13:4232985-4247605     | 0 | 0 |

|               |                         |   |   |
|---------------|-------------------------|---|---|
| Marcks1-ps4   | chr13:4247980-4249023   | 0 | 0 |
| Akr1c6        | chr13:4433588-4456776   | 0 | 0 |
| Akr1c20       | chr13:4506404-4522579   | 0 | 0 |
| Adarb2        | chr13:8202154-8759554   | 0 | 0 |
| Zp4-ps        | chr13:11614318-11617949 | 0 | 0 |
| Actn2         | chr13:12361693-12432999 | 0 | 0 |
| Prl2c4        | chr13:12883082-12892325 | 0 | 0 |
| Prl2c3        | chr13:12883087-12892346 | 0 | 0 |
| Prl2c2        | chr13:13088390-13097597 | 0 | 0 |
| Prl2c5        | chr13:13275048-13284107 | 0 | 0 |
| Nid1          | chr13:13529868-13604542 | 0 | 0 |
| 4933412O06Rik | chr13:15873496-15894463 | 0 | 0 |
| A530046M15    | chr13:15899075-15919370 | 0 | 0 |
| 4930448F12Rik | chr13:18176780-18192036 | 0 | 0 |
| Pou6f2        | chr13:18216793-18473873 | 0 | 0 |
| Sfrp4         | chr13:19715043-19724692 | 0 | 0 |
| Txndc3        | chr13:19736947-19789629 | 0 | 0 |
| Aoah          | chr13:20885987-21116121 | 0 | 0 |
| Olfr1370      | chr13:21164217-21165168 | 0 | 0 |
| Olfr263       | chr13:21224645-21225599 | 0 | 0 |
| Olfr1368      | chr13:21233979-21234924 | 0 | 0 |
| Gpx5          | chr13:21378297-21384555 | 0 | 0 |
| Gpx6          | chr13:21404071-21411493 | 0 | 0 |
| Olfr1367      | chr13:21438798-21439749 | 0 | 0 |
| Mir1896       | chr13:21537028-21537109 | 0 | 0 |
| Olfr1366      | chr13:21628842-21629896 | 0 | 0 |
| Olfr1535      | chr13:21646908-21647889 | 0 | 0 |
| Olfr1364      | chr13:21665378-21666323 | 0 | 0 |
| Olfr1362      | chr13:21702888-21703873 | 0 | 0 |
| Olfr11        | chr13:21730448-21731390 | 0 | 0 |
| Olfr1361      | chr13:21750236-21751190 | 0 | 0 |
| Mir1983       | chr13:21988786-21988918 | 0 | 0 |
| Vmn1r188      | chr13:22179746-22180673 | 0 | 0 |
| Vmn1r189      | chr13:22193595-22194534 | 0 | 0 |
| Vmn1r191      | chr13:22270554-22271451 | 0 | 0 |
| Vmn1r192      | chr13:22279014-22279917 | 0 | 0 |
| Vmn1r193      | chr13:22310729-22311689 | 0 | 0 |
| Vmn1r194      | chr13:22336083-22336974 | 0 | 0 |
| Vmn1r195      | chr13:22370185-22371273 | 0 | 0 |
| Vmn1r196      | chr13:22385061-22385967 | 0 | 0 |
| Vmn1r197      | chr13:22419779-22420676 | 0 | 0 |
| Vmn1r198      | chr13:22446214-22447117 | 0 | 0 |
| Vmn1r199      | chr13:22474406-22475510 | 0 | 0 |
| Vmn1r200      | chr13:22486897-22487836 | 0 | 0 |
| Vmn1r-ps103   | chr13:22533140-22534112 | 0 | 0 |
| Vmn1r201      | chr13:22566486-22567389 | 0 | 0 |
| Vmn1r202      | chr13:22593205-22594114 | 0 | 0 |
| Vmn1r203      | chr13:22615919-22616855 | 0 | 0 |
| Vmn1r204      | chr13:22648069-22648978 | 0 | 0 |
| Vmn1r205      | chr13:22683848-22684799 | 0 | 0 |
| Vmn1r206      | chr13:22711965-22712904 | 0 | 0 |
| Vmn1r207-ps   | chr13:22817552-22818491 | 0 | 0 |

|               |                         |   |   |
|---------------|-------------------------|---|---|
| Vmn1r208      | chr13:22864267-22865194 | 0 | 0 |
| Vmn1r209      | chr13:22897448-22898387 | 0 | 0 |
| Vmn1r210      | chr13:22919062-22919983 | 0 | 0 |
| Vmn1r211      | chr13:22943467-22944364 | 0 | 0 |
| Vmn1r212      | chr13:22974956-22976030 | 0 | 0 |
| Vmn1r213      | chr13:23103117-23104272 | 0 | 0 |
| Vmn1r214      | chr13:23126206-23127310 | 0 | 0 |
| Vmn1r215      | chr13:23167660-23168563 | 0 | 0 |
| Vmn1r216      | chr13:23191017-23191914 | 0 | 0 |
| Vmn1r217      | chr13:23205702-23206599 | 0 | 0 |
| Vmn1r218      | chr13:23228353-23229250 | 0 | 0 |
| Vmn1r219      | chr13:23254511-23255450 | 0 | 0 |
| Vmn1r220      | chr13:23275496-23276393 | 0 | 0 |
| Vmn1r221      | chr13:23309241-23310180 | 0 | 0 |
| Vmn1r222      | chr13:23323983-23324910 | 0 | 0 |
| Vmn1r223      | chr13:23341106-23342192 | 0 | 0 |
| 4933404K08Rik | chr13:23370218-23374136 | 0 | 0 |
| Btn1a1        | chr13:23548861-23557770 | 0 | 0 |
| Btn2a2        | chr13:23568931-23580726 | 0 | 0 |
| Hfe           | chr13:23795709-23802680 | 0 | 0 |
| Trim38        | chr13:23874440-23883364 | 0 | 0 |
| Slc17a2       | chr13:23898895-23915394 | 0 | 0 |
| Slc17a3       | chr13:23931302-23952583 | 0 | 0 |
| Slc17a1       | chr13:23962141-23987599 | 0 | 0 |
| Slc17a4       | chr13:23989757-24006876 | 0 | 0 |
| Hist1h2aa     | chr13:24026330-24026720 | 0 | 0 |
| Scgn          | chr13:24045325-24083083 | 0 | 0 |
| Gm11346       | chr13:24689993-24696636 | 0 | 0 |
| Nrsn1         | chr13:25343907-25361865 | 0 | 0 |
| Gm11351       | chr13:26012902-26058185 | 0 | 0 |
| 1700092E19Rik | chr13:26375027-26404275 | 0 | 0 |
| Hdgfl1        | chr13:26860040-26862034 | 0 | 0 |
| Prl           | chr13:27149438-27157072 | 0 | 0 |
| Prl3d1        | chr13:27186057-27192129 | 0 | 0 |
| Prl3d2        | chr13:27213572-27219351 | 0 | 0 |
| Prl3d3        | chr13:27248667-27254389 | 0 | 0 |
| Prl3c1        | chr13:27288528-27295618 | 0 | 0 |
| Prl3b1        | chr13:27334298-27341609 | 0 | 0 |
| Prl3a1        | chr13:27351357-27368529 | 0 | 0 |
| Prl6a1        | chr13:27404495-27411121 | 0 | 0 |
| Prl8a2        | chr13:27437557-27446073 | 0 | 0 |
| Prl2b1        | chr13:27475213-27482715 | 0 | 0 |
| Prl8a6        | chr13:27524721-27530466 | 0 | 0 |
| Prl8a8        | chr13:27598940-27605082 | 0 | 0 |
| Prl8a9        | chr13:27649869-27656473 | 0 | 0 |
| Prl8a1        | chr13:27665790-27674040 | 0 | 0 |
| Prl7b1        | chr13:27693687-27702451 | 0 | 0 |
| Prl7a1        | chr13:27725232-27734362 | 0 | 0 |
| Prl7a2        | chr13:27750452-27759905 | 0 | 0 |
| Prl7d1        | chr13:27800866-27808606 | 0 | 0 |
| Prl7c1        | chr13:27865363-27872673 | 0 | 0 |
| Prl2a1        | chr13:27893523-27900585 | 0 | 0 |

|               |                         |   |   |
|---------------|-------------------------|---|---|
| Prl2c1        | chr13:27941270-27949577 | 0 | 0 |
| Prl4a1        | chr13:28108091-28115415 | 0 | 0 |
| Prl5a1        | chr13:28234352-28243464 | 0 | 0 |
| Agtr1a        | chr13:30428224-30474736 | 0 | 0 |
| 4930519D14Rik | chr13:30706911-30716127 | 0 | 0 |
| 4930401O12Rik | chr13:31305278-31332955 | 0 | 0 |
| Serpinb1c     | chr13:32973265-32990009 | 0 | 0 |
| Serpinb9b     | chr13:33119282-33132427 | 0 | 0 |
| Serpinb6d     | chr13:33753273-33763454 | 0 | 0 |
| Serpinb6e     | chr13:33924213-33935277 | 0 | 0 |
| Fam50b        | chr13:34831510-34839491 | 0 | 0 |
| 1700011B04Rik | chr13:35273491-35279883 | 0 | 0 |
| Nrn1          | chr13:36817494-36826323 | 0 | 0 |
| F13a1         | chr13:36959046-37142113 | 0 | 0 |
| Gcm2          | chr13:41196795-41205357 | 0 | 0 |
| Gm10790       | chr13:41961283-42008461 | 0 | 0 |
| Phactr1       | chr13:42775991-43233881 | 0 | 0 |
| Rnf182        | chr13:43711165-43766313 | 0 | 0 |
| LOC622552     | chr13:43812159-43814407 | 0 | 0 |
| Gm5083        | chr13:44216535-44220548 | 0 | 0 |
| 1700029N11Rik | chr13:44535095-44552936 | 0 | 0 |
| G630093K05Rik | chr13:48005803-48029670 | 0 | 0 |
| 4931429P17Rik | chr13:48055698-48113977 | 0 | 0 |
| Mirlet7d      | chr13:48631380-48631483 | 0 | 0 |
| Mirlet7f-1    | chr13:48633197-48633286 | 0 | 0 |
| Mirlet7a-1    | chr13:48633547-48633641 | 0 | 0 |
| Barx1         | chr13:48758404-48761876 | 0 | 0 |
| Gm906         | chr13:50340549-50345677 | 0 | 0 |
| 2310081J21Rik | chr13:50357183-50358238 | 0 | 0 |
| Gm806         | chr13:50562675-50570724 | 0 | 0 |
| Mir683-1      | chr13:50639994-50640103 | 0 | 0 |
| Mir683-2      | chr13:50696340-50696449 | 0 | 0 |
| Gm904         | chr13:50738596-50741207 | 0 | 0 |
| 2310081J21Rik | chr13:50774538-50775593 | 0 | 0 |
| Gm8765        | chr13:50793697-50798778 | 0 | 0 |
| 4930518P08Rik | chr13:50848761-50860617 | 0 | 0 |
| 4921525O09Rik | chr13:52192109-52219529 | 0 | 0 |
| Gm2848        | chr13:52665248-52668594 | 0 | 0 |
| BB123696      | chr13:52824738-52852574 | 0 | 0 |
| Drd1a         | chr13:54146552-54151027 | 0 | 0 |
| Sncb          | chr13:54860220-54867801 | 0 | 0 |
| Eif4e1b       | chr13:54885363-54889819 | 0 | 0 |
| Fgfr4         | chr13:55254178-55270120 | 0 | 0 |
| Slc34a1       | chr13:55501008-55516056 | 0 | 0 |
| Pfn3          | chr13:55516048-55516593 | 0 | 0 |
| Tifab         | chr13:56275063-56280246 | 0 | 0 |
| Neurog1       | chr13:56351859-56353524 | 0 | 0 |
| Slc25a48      | chr13:56539715-56573724 | 0 | 0 |
| Il9           | chr13:56580637-56583607 | 0 | 0 |
| Trpc7         | chr13:56874468-56996949 | 0 | 0 |
| Mir874        | chr13:58124485-58124561 | 0 | 0 |
| Mir7-1        | chr13:58494139-58494247 | 0 | 0 |



|               |                           |   |   |
|---------------|---------------------------|---|---|
| Gm4814        | chr13:93843258-93844710   | 0 | 0 |
| Bhmt          | chr13:94386845-94407713   | 0 | 0 |
| Bhmt2         | chr13:94426051-94444257   | 0 | 0 |
| Dmgdh         | chr13:94444390-94522778   | 0 | 0 |
| AW495222      | chr13:94476054-94489130   | 0 | 0 |
| Otp           | chr13:95645581-95653636   | 0 | 0 |
| Crhbp         | chr13:96201330-96214786   | 0 | 0 |
| S100z         | chr13:96247255-96248610   | 0 | 0 |
| F2rl2         | chr13:96466874-96472723   | 0 | 0 |
| Gcnt4         | chr13:97694643-97720869   | 0 | 0 |
| 1700029F12Rik | chr13:97791818-97804317   | 0 | 0 |
| Gm5086        | chr13:98329954-98353949   | 0 | 0 |
| 2310005E17Rik | chr13:99194064-99205020   | 0 | 0 |
| Tmem174       | chr13:99404932-99407365   | 0 | 0 |
| 1700024P04Rik | chr13:99754044-99754520   | 0 | 0 |
| Zfp366        | chr13:99954777-100016987  | 0 | 0 |
| Cartpt        | chr13:100668438-100670638 | 0 | 0 |
| 5930438M14    | chr13:102002081-102017506 | 0 | 0 |
| 4933416M06Rik | chr13:102024273-102063351 | 0 | 0 |
| 4922502H24Rik | chr13:102161825-102167535 | 0 | 0 |
| 4933425L06Rik | chr13:105872201-105911862 | 0 | 0 |
| Htr1a         | chr13:106233772-106238213 | 0 | 0 |
| 1700006H21Rik | chr13:108477476-108482248 | 0 | 0 |
| Mir582        | chr13:110114937-110115017 | 0 | 0 |
| Mir1904       | chr13:110694016-110694096 | 0 | 0 |
| Gapt          | chr13:111142822-111147380 | 0 | 0 |
| 3110015C05Rik | chr13:112001676-112019639 | 0 | 0 |
| Actbl2        | chr13:112045220-112047957 | 0 | 0 |
| Mir449c       | chr13:113826190-113826299 | 0 | 0 |
| Mir449b       | chr13:113827626-113827706 | 0 | 0 |
| Mir449a       | chr13:113827741-113827832 | 0 | 0 |
| Gzmk          | chr13:113962081-113971105 | 0 | 0 |
| 4921509O07Rik | chr13:114236495-114293052 | 0 | 0 |
| Hspb3         | chr13:114453103-114453884 | 0 | 0 |
| 4930544M13Rik | chr13:115397435-115488030 | 0 | 0 |
| Itga1         | chr13:115748288-115892172 | 0 | 0 |
| Gm6416        | chr13:117918831-117924691 | 0 | 0 |
| 1700003P14Rik | chr13:119344974-119377436 | 0 | 0 |
| Fgf10         | chr13:119503505-119581380 | 0 | 0 |
| Gm10413       | chr14:3500819-3509260     | 0 | 0 |
| Gm10413       | chr14:3740222-3748663     | 0 | 0 |
| Fam107a       | chr14:9128791-9142290     | 0 | 0 |
| 4930455B14Rik | chr14:9498903-9505892     | 0 | 0 |
| Fezf2         | chr14:13174405-13178379   | 0 | 0 |
| Gm5087        | chr14:13989901-14117152   | 0 | 0 |
| Synpr         | chr14:14117293-14447983   | 0 | 0 |
| Olfr720       | chr14:15007643-15008594   | 0 | 0 |
| Olfr31        | chr14:15160626-15161580   | 0 | 0 |
| Gm5458        | chr14:20413359-20421809   | 0 | 0 |
| Myoz1         | chr14:21468323-21475762   | 0 | 0 |
| Synpo2l       | chr14:21478639-21487528   | 0 | 0 |
| Dusp13        | chr14:22552617-22567844   | 0 | 0 |

|               |                         |   |   |
|---------------|-------------------------|---|---|
| E330034G19Rik | chr14:25112585-25129181 | 0 | 0 |
| Mir3075       | chr14:26353924-26354009 | 0 | 0 |
| Cphx          | chr14:26762029-26775851 | 0 | 0 |
| Cphx          | chr14:26901782-26915608 | 0 | 0 |
| Cphx          | chr14:27041393-27055221 | 0 | 0 |
| Hesx1         | chr14:27813547-27815511 | 0 | 0 |
| Mir3076       | chr14:31385334-31385394 | 0 | 0 |
| Itih4         | chr14:31699677-31715169 | 0 | 0 |
| Itih3         | chr14:31721759-31736773 | 0 | 0 |
| Snord69       | chr14:31827478-31827537 | 0 | 0 |
| Snord19       | chr14:31829404-31829458 | 0 | 0 |
| Sema3g        | chr14:32031058-32042697 | 0 | 0 |
| Colq          | chr14:32336269-32390569 | 0 | 0 |
| Msemb         | chr14:32955208-32971512 | 0 | 0 |
| 1810011H11Rik | chr14:33599148-33631154 | 0 | 0 |
| Fam170b       | chr14:33647147-33649974 | 0 | 0 |
| E130203B14Rik | chr14:33669941-33752675 | 0 | 0 |
| Gdf10         | chr14:34736772-34748468 | 0 | 0 |
| Gdf2          | chr14:34754224-34760384 | 0 | 0 |
| Rbp3          | chr14:34767207-34777402 | 0 | 0 |
| Gm5460        | chr14:34854263-34860167 | 0 | 0 |
| Antxrl        | chr14:34866655-34889185 | 0 | 0 |
| Ppyr1         | chr14:34958831-34965605 | 0 | 0 |
| Gprin2        | chr14:35007626-35014819 | 0 | 0 |
| Sncg          | chr14:35183459-35187855 | 0 | 0 |
| Opn4          | chr14:35403803-35413328 | 0 | 0 |
| Grid1         | chr14:35633321-36394301 | 0 | 0 |
| Mir346        | chr14:35707794-35707892 | 0 | 0 |
| 4930596D02Rik | chr14:36622671-36625164 | 0 | 0 |
| 4930474N05Rik | chr14:36908150-36910041 | 0 | 0 |
| Rgr           | chr14:37850675-37862150 | 0 | 0 |
| Lrit1         | chr14:37868015-37878124 | 0 | 0 |
| Lrit2         | chr14:37881234-37886921 | 0 | 0 |
| 4930529F24Rik | chr14:39711589-39772082 | 0 | 0 |
| 1700109I08Rik | chr14:40468950-40498581 | 0 | 0 |
| Dydc1         | chr14:41886199-41905486 | 0 | 0 |
| Mat1a         | chr14:41918669-41937701 | 0 | 0 |
| Mbl1          | chr14:41964744-41972248 | 0 | 0 |
| Gm10377       | chr14:43371374-43376742 | 0 | 0 |
| Gm10377       | chr14:43688720-43694109 | 0 | 0 |
| 1700001F09Rik | chr14:44020916-44026344 | 0 | 0 |
| Gm10375       | chr14:44180291-44185678 | 0 | 0 |
| Ear1          | chr14:44396430-44397304 | 0 | 0 |
| Ear10         | chr14:44500562-44501033 | 0 | 0 |
| Ang5          | chr14:44534733-44540745 | 0 | 0 |
| Ang3          | chr14:44534733-44540745 | 0 | 0 |
| Ang6          | chr14:44579490-44579934 | 0 | 0 |
| Ear2          | chr14:44680318-44681196 | 0 | 0 |
| Ear3          | chr14:44680551-44681022 | 0 | 0 |
| 4930503E14Rik | chr14:44740831-44749036 | 0 | 0 |
| BC061237      | chr14:45119792-45126016 | 0 | 0 |
| Gm8267        | chr14:45336841-45344662 | 0 | 0 |







|               |                           |   |   |
|---------------|---------------------------|---|---|
| Defb43        | chr14:63630607-63636925   | 0 | 0 |
| Defb30        | chr14:63652923-63656683   | 0 | 0 |
| Defb42        | chr14:63665827-63667443   | 0 | 0 |
| Gata4         | chr14:63817751-63864097   | 0 | 0 |
| Blk           | chr14:63991673-64036024   | 0 | 0 |
| Mir598        | chr14:64346025-64346104   | 0 | 0 |
| Prss51        | chr14:64712532-64716509   | 0 | 0 |
| 4930471C04Rik | chr14:64718131-64723072   | 0 | 0 |
| A930011O12Rik | chr14:65206951-65212798   | 0 | 0 |
| Mir124a-1     | chr14:65209493-65209578   | 0 | 0 |
| Mir3078       | chr14:65210021-65210108   | 0 | 0 |
| Pnoc          | chr14:66019509-66044309   | 0 | 0 |
| Scara5        | chr14:66285239-66383663   | 0 | 0 |
| Gulo          | chr14:66605623-66628047   | 0 | 0 |
| Adam2         | chr14:66646165-66696570   | 0 | 0 |
| Stmn4         | chr14:66963211-66980517   | 0 | 0 |
| Adra1a        | chr14:67254094-67352166   | 0 | 0 |
| Pnma2         | chr14:67530044-67538898   | 0 | 0 |
| 4930438E09Rik | chr14:67950878-68016579   | 0 | 0 |
| Adam7         | chr14:69115393-69151746   | 0 | 0 |
| 1700092C10Rik | chr14:69782855-69789900   | 0 | 0 |
| Nkx2-6        | chr14:69789858-69793597   | 0 | 0 |
| Nkx3-1        | chr14:69808748-69812715   | 0 | 0 |
| Synb          | chr14:69908454-69912356   | 0 | 0 |
| Pebp4         | chr14:70240226-70459693   | 0 | 0 |
| Mir320        | chr14:70843316-70843398   | 0 | 0 |
| Lgi3          | chr14:70930627-70938131   | 0 | 0 |
| Fgf17         | chr14:71036011-71042075   | 0 | 0 |
| 4930434J06Rik | chr14:72256515-72320245   | 0 | 0 |
| Gm9199        | chr14:73425409-73426697   | 0 | 0 |
| Cysltr2       | chr14:73428934-73448921   | 0 | 0 |
| Mir687        | chr14:73606569-73606658   | 0 | 0 |
| 4933402J15Rik | chr14:74755333-74769548   | 0 | 0 |
| Gm4278        | chr14:75374892-75386911   | 0 | 0 |
| Siah3         | chr14:75855788-75925948   | 0 | 0 |
| Spert         | chr14:75982640-75992923   | 0 | 0 |
| Gm1587        | chr14:78193751-78198775   | 0 | 0 |
| Mir1971       | chr14:78591179-78591285   | 0 | 0 |
| Tnfsf11       | chr14:78677252-78707850   | 0 | 0 |
| Lect1         | chr14:80037496-80061977   | 0 | 0 |
| 4930452G13Rik | chr14:80102726-80112737   | 0 | 0 |
| Mir759        | chr14:80138237-80138335   | 0 | 0 |
| Pcdh8         | chr14:80166578-80171119   | 0 | 0 |
| Olfm4         | chr14:80400108-80421737   | 0 | 0 |
| 4930529K09Rik | chr14:86645776-86661849   | 0 | 0 |
| 4930474H20Rik | chr14:90526697-90669567   | 0 | 0 |
| 4921530L21Rik | chr14:96280484-96281994   | 0 | 0 |
| Klhl1         | chr14:96504483-96918253   | 0 | 0 |
| 1700110M21Rik | chr14:101596906-101599286 | 0 | 0 |
| Mir5130       | chr14:103381765-103381849 | 0 | 0 |
| Ednrb         | chr14:104213841-104243390 | 0 | 0 |
| 4930432J09Rik | chr14:104376844-104426359 | 0 | 0 |

|               |                           |   |   |
|---------------|---------------------------|---|---|
| D130009I18Rik | chr14:105038363-105366000 | 0 | 0 |
| 5430440P10Rik | chr14:105826775-105836933 | 0 | 0 |
| 4930449E01Rik | chr14:105898004-105904845 | 0 | 0 |
| Trim52        | chr14:106505414-106508497 | 0 | 0 |
| 1700128A07Rik | chr14:106816403-106885701 | 0 | 0 |
| Slitrk1       | chr14:109309205-109313456 | 0 | 0 |
| Slitrk5       | chr14:112074336-112082357 | 0 | 0 |
| 4930524C18Rik | chr14:115231186-115260549 | 0 | 0 |
| Mir17         | chr14:115442892-115442976 | 0 | 0 |
| Mir18         | chr14:115443072-115443168 | 0 | 0 |
| Mir19a        | chr14:115443221-115443303 | 0 | 0 |
| Mir20a        | chr14:115443378-115443485 | 0 | 0 |
| Mir19b-1      | chr14:115443526-115443613 | 0 | 0 |
| Mir92-1       | chr14:115443648-115443728 | 0 | 0 |
| Gpc5          | chr14:115491436-116924414 | 0 | 0 |
| 4930505G20Rik | chr14:115795772-115808774 | 0 | 0 |
| Gm9376        | chr14:118666379-118666992 | 0 | 0 |
| 1700044C05Rik | chr14:118765099-118797387 | 0 | 0 |
| 1700006F04Rik | chr14:120148448-120150786 | 0 | 0 |
| Oxgr1         | chr14:120418806-120441657 | 0 | 0 |
| Timm8a2       | chr14:122433895-122437644 | 0 | 0 |
| Gm5089        | chr14:122764900-122850368 | 0 | 0 |
| Zic5          | chr14:122858381-122864880 | 0 | 0 |
| 2610035F20Rik | chr14:122869598-122874421 | 0 | 0 |
| Zic2          | chr14:122874605-122879550 | 0 | 0 |
| AA536875      | chr14:123567724-123575398 | 0 | 0 |
| C6            | chr15:4677209-4754045     | 0 | 0 |
| Heatr7b2      | chr15:4848736-4912201     | 0 | 0 |
| C7            | chr15:4938761-5013773     | 0 | 0 |
| Snord72       | chr15:5068420-5068480     | 0 | 0 |
| C9            | chr15:6395332-6448476     | 0 | 0 |
| Egflam        | chr15:7156119-7348304     | 0 | 0 |
| Ugt3a2        | chr15:9265352-9300625     | 0 | 0 |
| Agxt2         | chr15:10288333-10339493   | 0 | 0 |
| Ttc23l        | chr15:10433701-10488423   | 0 | 0 |
| Gm19276       | chr15:10758805-10762468   | 0 | 0 |
| 1700047G03Rik | chr15:11896816-11899838   | 0 | 0 |
| Mir1898       | chr15:12101246-12101329   | 0 | 0 |
| Cdh6          | chr15:12963954-13103394   | 0 | 0 |
| Cdh9          | chr15:16707855-16786532   | 0 | 0 |
| 4921515E04Rik | chr15:18007891-18299382   | 0 | 0 |
| Cdh10         | chr15:18750083-18943989   | 0 | 0 |
| Cdh18         | chr15:22966217-23404173   | 0 | 0 |
| Mir297-1      | chr15:27175876-27246498   | 0 | 0 |
| Snord123      | chr15:32171599-32171687   | 0 | 0 |
| 9430069I07Rik | chr15:34278805-34287627   | 0 | 0 |
| Kcns2         | chr15:34767135-34772092   | 0 | 0 |
| BC048602      | chr15:35236764-35258290   | 0 | 0 |
| Mir599        | chr15:35590585-35590673   | 0 | 0 |
| Mir875        | chr15:35590724-35590802   | 0 | 0 |
| Odf1          | chr15:38148957-38156490   | 0 | 0 |
| 2310043O21Rik | chr15:38479098-38524689   | 0 | 0 |



|               |                         |   |   |
|---------------|-------------------------|---|---|
| Mb            | chr15:76845916-76881098 | 0 | 0 |
| Apol7b        | chr15:77252638-77277890 | 0 | 0 |
| Apol10a       | chr15:77307476-77321499 | 0 | 0 |
| Apol11a       | chr15:77338700-77347749 | 0 | 0 |
| 1700025B11Rik | chr15:77388669-77392322 | 0 | 0 |
| Apol10b       | chr15:77414587-77426555 | 0 | 0 |
| Gm8221        | chr15:77449397-77457828 | 0 | 0 |
| Apol11b       | chr15:77464380-77473716 | 0 | 0 |
| Apol7e        | chr15:77529318-77549718 | 0 | 0 |
| Cacng2        | chr15:77824052-77949710 | 0 | 0 |
| Ncf4          | chr15:78075240-78093010 | 0 | 0 |
| Il2rb         | chr15:78310978-78325496 | 0 | 0 |
| C1qtnf6       | chr15:78353775-78360081 | 0 | 0 |
| Cyth4         | chr15:78427476-78452449 | 0 | 0 |
| Elfn2         | chr15:78500436-78548543 | 0 | 0 |
| Mir1943       | chr15:79205657-79205730 | 0 | 0 |
| Dmc1          | chr15:79391929-79435514 | 0 | 0 |
| Snord83b      | chr15:79908932-79909009 | 0 | 0 |
| Snord43       | chr15:79913288-79913336 | 0 | 0 |
| Cacna1i       | chr15:80117667-80228722 | 0 | 0 |
| Mir5113       | chr15:80770468-80770550 | 0 | 0 |
| 4930483J18Rik | chr15:81021282-81023187 | 0 | 0 |
| Mchr1         | chr15:81065928-81069394 | 0 | 0 |
| 1700029P11Rik | chr15:81810969-81811993 | 0 | 0 |
| 4930407I10Rik | chr15:81889580-81896968 | 0 | 0 |
| Mei1          | chr15:81900546-81957244 | 0 | 0 |
| Mir33         | chr15:82028551-82028620 | 0 | 0 |
| Cenpm         | chr15:82064205-82075177 | 0 | 0 |
| 1500009C09Rik | chr15:82082826-82091183 | 0 | 0 |
| Wbp2nl        | chr15:82129413-82144988 | 0 | 0 |
| Cyp2d11       | chr15:82219583-82224452 | 0 | 0 |
| Cyp2d10       | chr15:82233275-82237624 | 0 | 0 |
| Cyp2d9        | chr15:82282806-82287257 | 0 | 0 |
| Cyp2d12       | chr15:82385527-82389843 | 0 | 0 |
| Cyp2d34       | chr15:82446394-82451337 | 0 | 0 |
| Cyp2d13       | chr15:82467179-82472475 | 0 | 0 |
| Cyp2d37-ps    | chr15:82519179-82520488 | 0 | 0 |
| Cyp2d40       | chr15:82590262-82594552 | 0 | 0 |
| Scube1        | chr15:83433012-83555451 | 0 | 0 |
| Mpped1        | chr15:83610452-83688904 | 0 | 0 |
| Pnpla5        | chr15:83943050-83953605 | 0 | 0 |
| Mir1249       | chr15:84781955-84782053 | 0 | 0 |
| Smc1b         | chr15:84895118-84962387 | 0 | 0 |
| Gm19277       | chr15:84979683-84986562 | 0 | 0 |
| Mirlet7c-2    | chr15:85537032-85537127 | 0 | 0 |
| Mirlet7b      | chr15:85537748-85537833 | 0 | 0 |
| B230214G05    | chr15:88145303-88203081 | 0 | 0 |
| Zdhhc25       | chr15:88430731-88431972 | 0 | 0 |
| Mlc1          | chr15:88786313-88808983 | 0 | 0 |
| Klhdc7b       | chr15:89217321-89219139 | 0 | 0 |
| Syce3         | chr15:89220604-89240934 | 0 | 0 |
| Acrr          | chr15:89398756-89405016 | 0 | 0 |

|               |                           |   |   |
|---------------|---------------------------|---|---|
| Syt10         | chr15:89612823-89672291   | 0 | 0 |
| Spn-ps        | chr15:90721826-90728907   | 0 | 0 |
| Abcd2         | chr15:90976301-91022238   | 0 | 0 |
| Smgc          | chr15:91668758-91691866   | 0 | 0 |
| Cntn1         | chr15:91881595-92172398   | 0 | 0 |
| 9430014N10Rik | chr15:93735286-93757542   | 0 | 0 |
| D630010B17Rik | chr15:94077632-94086037   | 0 | 0 |
| Adamts20      | chr15:94100593-94234781   | 0 | 0 |
| LOC100043315  | chr15:94928052-94979749   | 0 | 0 |
| Dbx2          | chr15:95453993-95485202   | 0 | 0 |
| D030018L15Rik | chr15:95903767-95909983   | 0 | 0 |
| AI836003      | chr15:97998236-98000565   | 0 | 0 |
| Olfr288       | chr15:98016443-98025973   | 0 | 0 |
| Olfr287       | chr15:98037401-98051487   | 0 | 0 |
| Olfr286       | chr15:98057105-98064881   | 0 | 0 |
| H1fnt         | chr15:98086412-98087738   | 0 | 0 |
| Olfr285       | chr15:98143019-98143979   | 0 | 0 |
| Olfr284       | chr15:98170452-98171370   | 0 | 0 |
| Olfr283       | chr15:98208609-98209539   | 0 | 0 |
| 1700031M16Rik | chr15:98228875-98246566   | 0 | 0 |
| Olfr282       | chr15:98267900-98268828   | 0 | 0 |
| Olfr281       | chr15:98286742-98287678   | 0 | 0 |
| Lalba         | chr15:98310830-98313114   | 0 | 0 |
| Olfr279       | chr15:98327904-98328837   | 0 | 0 |
| Snora2b       | chr15:98356778-98356890   | 0 | 0 |
| Wnt10b        | chr15:98602182-98608581   | 0 | 0 |
| Wnt1          | chr15:98620287-98624261   | 0 | 0 |
| Ddn           | chr15:98634212-98638356   | 0 | 0 |
| C1ql4         | chr15:98915184-98918159   | 0 | 0 |
| Dnajc22       | chr15:98929914-98935138   | 0 | 0 |
| Fam186b       | chr15:99101448-99117611   | 0 | 0 |
| Aqp2          | chr15:99409486-99414976   | 0 | 0 |
| Aqp6          | chr15:99431830-99435908   | 0 | 0 |
| 1700030F18Rik | chr15:99748778-99762089   | 0 | 0 |
| I730030J21Rik | chr15:100560935-100563168 | 0 | 0 |
| Figl2         | chr15:100880624-100884830 | 0 | 0 |
| Ankrd33       | chr15:100946185-100950455 | 0 | 0 |
| Acvrl1        | chr15:100958967-100975767 | 0 | 0 |
| Mir1941       | chr15:101199782-101199865 | 0 | 0 |
| Gm6042        | chr15:101334246-101336744 | 0 | 0 |
| Gm5476        | chr15:101417747-101419003 | 0 | 0 |
| Gm5477        | chr15:101439304-101440910 | 0 | 0 |
| Krt71         | chr15:101564379-101573528 | 0 | 0 |
| Krt74         | chr15:101584689-101593935 | 0 | 0 |
| Krt72-ps      | chr15:101606990-101616889 | 0 | 0 |
| Krt73         | chr15:101623738-101632763 | 0 | 0 |
| Krt2          | chr15:101641119-101648600 | 0 | 0 |
| Sp7           | chr15:102187607-102196702 | 0 | 0 |
| Mir688        | chr15:102502222-102502297 | 0 | 0 |
| Hoxc12        | chr15:102767283-102768948 | 0 | 0 |
| Hoxc11        | chr15:102784956-102787132 | 0 | 0 |
| Hoxc10        | chr15:102797226-102802328 | 0 | 0 |

|               |                           |   |   |
|---------------|---------------------------|---|---|
| Mir196a-2     | chr15:102803780-102803865 | 0 | 0 |
| Hoxc9         | chr15:102807462-102814875 | 0 | 0 |
| Hoxc8         | chr15:102820969-102824685 | 0 | 0 |
| Hoxc6         | chr15:102839992-102842312 | 0 | 0 |
| Hoxc5         | chr15:102844438-102847860 | 0 | 0 |
| Mir615        | chr15:102845340-102845432 | 0 | 0 |
| Hoxc4         | chr15:102864825-102867283 | 0 | 0 |
| D930007P13Rik | chr15:102953500-102977259 | 0 | 0 |
| Mir148b       | chr15:103115555-103115652 | 0 | 0 |
| Gpr84         | chr15:103138665-103140869 | 0 | 0 |
| Gtsf1         | chr15:103232889-103260858 | 0 | 0 |
| BC048502      | chr15:103269390-103278890 | 0 | 0 |
| Pde1b         | chr15:103333728-103360483 | 0 | 0 |
| Ppp1r1a       | chr15:103360709-103368423 | 0 | 0 |
| Glycam1       | chr15:103393192-103395509 | 0 | 0 |
| Olfr161       | chr16:3592397-3593339     | 0 | 0 |
| Olfr15        | chr16:3838974-3839913     | 0 | 0 |
| 4930455F16Rik | chr16:4219911-4229116     | 0 | 0 |
| 11-Sep        | chr16:4986950-4997945     | 0 | 0 |
| Cldn26        | chr16:8409368-8425229     | 0 | 0 |
| Rpl39l        | chr16:10170320-10175004   | 0 | 0 |
| Tnp2          | chr16:10788027-10788748   | 0 | 0 |
| Prm3          | chr16:10790600-10791007   | 0 | 0 |
| Prm2          | chr16:10791473-10792190   | 0 | 0 |
| Mir1945       | chr16:11254460-11254538   | 0 | 0 |
| 1700003L19Rik | chr16:12811482-12848746   | 0 | 0 |
| Mir193b       | chr16:13449615-13449694   | 0 | 0 |
| Mir365-1      | chr16:13453932-13454019   | 0 | 0 |
| 2310015D24Rik | chr16:13514223-13520512   | 0 | 0 |
| 1810007I06Rik | chr16:13729928-13739564   | 0 | 0 |
| Mir484        | chr16:14159718-14159785   | 0 | 0 |
| A630010A05Rik | chr16:14562409-14621377   | 0 | 0 |
| Olfr19        | chr16:16673142-16674072   | 0 | 0 |
| 4933404G15Rik | chr16:16707779-16718214   | 0 | 0 |
| Igll1         | chr16:16860763-16864078   | 0 | 0 |
| Mir130b       | chr16:17124153-17124235   | 0 | 0 |
| Mir301b       | chr16:17124492-17124589   | 0 | 0 |
| Gsc2          | chr16:17913646-17915152   | 0 | 0 |
| Mir1306       | chr16:18284331-18284410   | 0 | 0 |
| Mir185        | chr16:18327493-18327558   | 0 | 0 |
| Cldn5         | chr16:18776939-18778355   | 0 | 0 |
| Olfr164       | chr16:19285886-19286834   | 0 | 0 |
| Olfr165       | chr16:19407168-19408110   | 0 | 0 |
| Olfr166       | chr16:19486932-19487871   | 0 | 0 |
| Olfr167       | chr16:19514788-19515727   | 0 | 0 |
| Olfr168       | chr16:19530072-19531011   | 0 | 0 |
| Olfr169       | chr16:19566032-19566974   | 0 | 0 |
| Olfr170       | chr16:19605817-19606759   | 0 | 0 |
| Olfr171       | chr16:19624249-19625194   | 0 | 0 |
| B3gnt5        | chr16:19760326-19772846   | 0 | 0 |
| A930003A15Rik | chr16:19876660-19884367   | 0 | 0 |
| Klh6          | chr16:19946585-19983122   | 0 | 0 |

|               |                         |   |   |
|---------------|-------------------------|---|---|
| Mir684-1      | chr16:20176222-20176307 | 0 | 0 |
| Cyp2ab1       | chr16:20308459-20325477 | 0 | 0 |
| Mir1224       | chr16:20604524-20604609 | 0 | 0 |
| Snord66       | chr16:20684328-20684386 | 0 | 0 |
| Chrd          | chr16:20733199-20742457 | 0 | 0 |
| Crygs         | chr16:22805275-22811483 | 0 | 0 |
| Kng2          | chr16:22985924-23029174 | 0 | 0 |
| Kng1          | chr16:23058372-23082151 | 0 | 0 |
| Snord2        | chr16:23109025-23109093 | 0 | 0 |
| Adipoq        | chr16:23146608-23158041 | 0 | 0 |
| Rtp1          | chr16:23429205-23434033 | 0 | 0 |
| Masp1         | chr16:23451857-23520663 | 0 | 0 |
| Sst           | chr16:23889666-23890930 | 0 | 0 |
| Rtp2          | chr16:23925633-23930880 | 0 | 0 |
| A230028O05Rik | chr16:25059724-25069144 | 0 | 0 |
| Cldn16        | chr16:26463220-26482850 | 0 | 0 |
| Ostn          | chr16:27307726-27351295 | 0 | 0 |
| Uts2d         | chr16:27353407-27370325 | 0 | 0 |
| Gm10823       | chr16:27850015-27926214 | 0 | 0 |
| Mir690        | chr16:28600020-28600129 | 0 | 0 |
| Gm1968        | chr16:29958012-29979210 | 0 | 0 |
| 9030404E10Rik | chr16:30021927-30039565 | 0 | 0 |
| Cpn2          | chr16:30256464-30267618 | 0 | 0 |
| Apod          | chr16:31296277-31314682 | 0 | 0 |
| Bex6          | chr16:32179885-32187030 | 0 | 0 |
| Mir1946a      | chr16:32267535-32267669 | 0 | 0 |
| Zdhhc19       | chr16:32496366-32507300 | 0 | 0 |
| Mir1947       | chr16:33105446-33105531 | 0 | 0 |
| Ropn1         | chr16:34651296-34678696 | 0 | 0 |
| 1700119H24Rik | chr16:34935940-34939415 | 0 | 0 |
| 1600019K03Rik | chr16:35503255-35509505 | 0 | 0 |
| Gm5416        | chr16:36210488-36217874 | 0 | 0 |
| Stfa1         | chr16:36277233-36285457 | 0 | 0 |
| BC117090      | chr16:36321750-36334418 | 0 | 0 |
| Fbxo40        | chr16:36966158-36979222 | 0 | 0 |
| Gpr156        | chr16:37916581-38007615 | 0 | 0 |
| 4930542C21Rik | chr16:38017408-38054612 | 0 | 0 |
| Cd80          | chr16:38459012-38487014 | 0 | 0 |
| 4930435E12Rik | chr16:38812317-38828862 | 0 | 0 |
| Gap43         | chr16:42248673-42340764 | 0 | 0 |
| 4932412D23Rik | chr16:42796500-42875875 | 0 | 0 |
| Mir568        | chr16:43640767-43640850 | 0 | 0 |
| Mir3081       | chr16:44558158-44558242 | 0 | 0 |
| Cd200r1       | chr16:44765848-44795090 | 0 | 0 |
| Gm609         | chr16:45416867-45493082 | 0 | 0 |
| Gcet2         | chr16:45610552-45622980 | 0 | 0 |
| Dppa4         | chr16:48283847-48294405 | 0 | 0 |
| Gm5485        | chr16:48399565-48412529 | 0 | 0 |
| Trat1         | chr16:48734802-48772069 | 0 | 0 |
| Retnlb        | chr16:48816968-48819005 | 0 | 0 |
| Retnla        | chr16:48842664-48844574 | 0 | 0 |
| Retnlg        | chr16:48872720-48874611 | 0 | 0 |



|               |                         |   |   |
|---------------|-------------------------|---|---|
| Myh15         | chr16:49057598-49199217 | 0 | 0 |
| Gm6936        | chr16:49980572-49997588 | 0 | 0 |
| G730013B05Rik | chr16:50526357-50559572 | 0 | 0 |
| Ccdc54        | chr16:50589971-50591267 | 0 | 0 |
| 4930542D17Rik | chr16:50590615-50654279 | 0 | 0 |
| 4930404A05Rik | chr16:52799620-52815857 | 0 | 0 |
| Gpr128        | chr16:56724721-56795971 | 0 | 0 |
| Gm813         | chr16:58613798-58617091 | 0 | 0 |
| E330017A01Rik | chr16:58635374-58638516 | 0 | 0 |
| Gpr15         | chr16:58717547-58718837 | 0 | 0 |
| Olfr172       | chr16:58760265-58761353 | 0 | 0 |
| Olfr173       | chr16:58796574-58797738 | 0 | 0 |
| Olfr175-ps1   | chr16:58823606-58826587 | 0 | 0 |
| Olfr176       | chr16:58872040-58872974 | 0 | 0 |
| Olfr177       | chr16:58872044-58872974 | 0 | 0 |
| Olfr178       | chr16:58889084-58890044 | 0 | 0 |
| Olfr180       | chr16:58915511-58918312 | 0 | 0 |
| Olfr181       | chr16:58925382-58928470 | 0 | 0 |
| Olfr183       | chr16:58995229-59000442 | 0 | 0 |
| Olfr186       | chr16:59026801-59027731 | 0 | 0 |
| Olfr187       | chr16:59035605-59039575 | 0 | 0 |
| Olfr190       | chr16:59073980-59074904 | 0 | 0 |
| Olfr191       | chr16:59085377-59086307 | 0 | 0 |
| Olfr192       | chr16:59097891-59098816 | 0 | 0 |
| Olfr193       | chr16:59109504-59110434 | 0 | 0 |
| Olfr194       | chr16:59118973-59119894 | 0 | 0 |
| Olfr195       | chr16:59148677-59149604 | 0 | 0 |
| Olfr196       | chr16:59167037-59167967 | 0 | 0 |
| Olfr197       | chr16:59185381-59186307 | 0 | 0 |
| Olfr198       | chr16:59201329-59202250 | 0 | 0 |
| Olfr199       | chr16:59215510-59216437 | 0 | 0 |
| Olfr201       | chr16:59268564-59269491 | 0 | 0 |
| Olfr202       | chr16:59283397-59284321 | 0 | 0 |
| Olfr203       | chr16:59302980-59303901 | 0 | 0 |
| Olfr204       | chr16:59314313-59315231 | 0 | 0 |
| Olfr205       | chr16:59328415-59329333 | 0 | 0 |
| Olfr206       | chr16:59344604-59345525 | 0 | 0 |
| Olfr207       | chr16:59361124-59362042 | 0 | 0 |
| Gabrr3        | chr16:59407207-59461565 | 0 | 0 |
| 1700022E09Rik | chr16:59466697-59469064 | 0 | 0 |
| Epha3         | chr16:63545043-63863983 | 0 | 0 |
| Htr1f         | chr16:64924554-65105610 | 0 | 0 |
| 1700010K23Rik | chr16:66657362-66664871 | 0 | 0 |
| D16Ertd519e   | chr16:70616669-70625067 | 0 | 0 |
| 4931420L22Rik | chr16:71131320-71139274 | 0 | 0 |
| 4930567J20Rik | chr16:71250148-71267421 | 0 | 0 |
| Mir691        | chr16:74342234-74342312 | 0 | 0 |
| 4930578N18Rik | chr16:76122857-76156331 | 0 | 0 |
| 1700041M19Rik | chr16:77004472-77011126 | 0 | 0 |
| Mir99a        | chr16:77599180-77599245 | 0 | 0 |
| Mirlet7c-1    | chr16:77599901-77599995 | 0 | 0 |
| Mir125b-2     | chr16:77646517-77646588 | 0 | 0 |

|               |                         |   |   |
|---------------|-------------------------|---|---|
| 4930553E22Rik | chr16:84371387-84375750 | 0 | 0 |
| 4930529L06Rik | chr16:84680033-84685392 | 0 | 0 |
| Mir155        | chr16:84714384-84714449 | 0 | 0 |
| 4930556C24Rik | chr16:85819455-85827017 | 0 | 0 |
| ORF63         | chr16:87553574-87595581 | 0 | 0 |
| Grik1         | chr16:87896141-88290503 | 0 | 0 |
| Krtap24-1     | chr16:88610953-88612524 | 0 | 0 |
| Krtap26-1     | chr16:88647068-88648041 | 0 | 0 |
| Krtap27-1     | chr16:88671290-88671899 | 0 | 0 |
| Krtap14       | chr16:88825535-88826390 | 0 | 0 |
| Krtap15       | chr16:88829253-88830089 | 0 | 0 |
| Krtap16-2     | chr16:88869162-88869655 | 0 | 0 |
| Krtap16-1     | chr16:88873909-88874514 | 0 | 0 |
| Krtap16-5     | chr16:88877757-88878283 | 0 | 0 |
| Krtap16-4     | chr16:88885030-88885334 | 0 | 0 |
| Krtap8-2      | chr16:88896212-88896694 | 0 | 0 |
| Krtap16-10b   | chr16:88932048-88932509 | 0 | 0 |
| Krtap22-2     | chr16:89010624-89011004 | 0 | 0 |
| Gm10229       | chr16:89015521-89016091 | 0 | 0 |
| Krtap6-1      | chr16:89031943-89032537 | 0 | 0 |
| Krtap16-8     | chr16:89047533-89048144 | 0 | 0 |
| Krtap20-2     | chr16:89206105-89206639 | 0 | 0 |
| Krtap16-7     | chr16:89403271-89404019 | 0 | 0 |
| Krtap6-2      | chr16:89419567-89420356 | 0 | 0 |
| Krtap8-1      | chr16:89487618-89488197 | 0 | 0 |
| Krtap7-1      | chr16:89507947-89508568 | 0 | 0 |
| Krtap11-1     | chr16:89570420-89571428 | 0 | 0 |
| Mrap          | chr16:90738568-90750021 | 0 | 0 |
| 4930563D23Rik | chr16:92319007-92321686 | 0 | 0 |
| Kcne1         | chr16:92346245-92359713 | 0 | 0 |
| 1810053B23Rik | chr16:93343960-93359788 | 0 | 0 |
| Mir802        | chr16:93369964-93370061 | 0 | 0 |
| Cldn14        | chr16:93919275-94009082 | 0 | 0 |
| Ripply3       | chr16:94550028-94558542 | 0 | 0 |
| Erg           | chr16:95581810-95751972 | 0 | 0 |
| Itgb2l        | chr16:96643904-96665221 | 0 | 0 |
| 4930548J01Rik | chr17:4119445-4122102   | 0 | 0 |
| Mir692-1      | chr17:7099577-7099686   | 0 | 0 |
| Gm1604b       | chr17:7229891-7291946   | 0 | 0 |
| Gm1604b       | chr17:8231374-8294093   | 0 | 0 |
| Ccr6          | chr17:8428907-8449994   | 0 | 0 |
| 6530411M01Rik | chr17:9340583-9360887   | 0 | 0 |
| Pabpc6        | chr17:9859361-9862569   | 0 | 0 |
| Plg           | chr17:12571474-12612250 | 0 | 0 |
| Slc22a3       | chr17:12612839-12700570 | 0 | 0 |
| Slc22a1       | chr17:12841740-12868704 | 0 | 0 |
| Pnlcd1        | chr17:13081767-13102866 | 0 | 0 |
| Snora20       | chr17:13115722-13115783 | 0 | 0 |
| Gm5091        | chr17:15368548-15377747 | 0 | 0 |
| Gm10510       | chr17:15487776-15491425 | 0 | 0 |
| Vmn2r90       | chr17:17840904-17871131 | 0 | 0 |
| Mir99b        | chr17:17967151-17967221 | 0 | 0 |

|          |                         |   |   |
|----------|-------------------------|---|---|
| Mirlet7e | chr17:17967315-17967408 | 0 | 0 |
| Mir125a  | chr17:17967775-17967843 | 0 | 0 |
| Fpr1     | chr17:18013434-18020903 | 0 | 0 |
| Fpr2     | chr17:18024787-18030916 | 0 | 0 |
| Fpr3     | chr17:18107421-18108641 | 0 | 0 |
| Fpr-rs4  | chr17:18158696-18159668 | 0 | 0 |
| Vmn2r91  | chr17:18222020-18273607 | 0 | 0 |
| Vmn2r92  | chr17:18288893-18322142 | 0 | 0 |
| Vmn2r94  | chr17:18380533-18414530 | 0 | 0 |
| Vmn2r93  | chr17:18435244-18463405 | 0 | 0 |
| Vmn2r95  | chr17:18561067-18589288 | 0 | 0 |
| Vmn2r96  | chr17:18718690-18735121 | 0 | 0 |
| Vmn2r97  | chr17:19051285-19085035 | 0 | 0 |
| Vmn2r98  | chr17:19190456-19218275 | 0 | 0 |
| Vmn2r99  | chr17:19499098-19531554 | 0 | 0 |
| Vmn2r100 | chr17:19641774-19669024 | 0 | 0 |
| Vmn2r101 | chr17:19714194-19749281 | 0 | 0 |
| Vmn2r102 | chr17:19797362-19831712 | 0 | 0 |
| Vmn2r103 | chr17:19910326-19949500 | 0 | 0 |
| Vmn2r104 | chr17:20166388-20185169 | 0 | 0 |
| Fpr-rs6  | chr17:20319041-20320061 | 0 | 0 |
| Vmn2r105 | chr17:20345193-20371836 | 0 | 0 |
| Vmn2r106 | chr17:20404510-20422394 | 0 | 0 |
| Vmn2r107 | chr17:20482388-20512736 | 0 | 0 |
| Vmn1r224 | chr17:20556126-20557023 | 0 | 0 |
| Vmn2r108 | chr17:20599336-20618200 | 0 | 0 |
| Vmn1r225 | chr17:20639262-20640159 | 0 | 0 |
| Vmn2r109 | chr17:20677480-20701720 | 0 | 0 |
| Vmn2r110 | chr17:20710792-20733223 | 0 | 0 |
| Fpr-rs3  | chr17:20760809-20761841 | 0 | 0 |
| Vmn1r226 | chr17:20824471-20825368 | 0 | 0 |
| Vmn1r227 | chr17:20872063-20873090 | 0 | 0 |
| Vmn1r228 | chr17:20913022-20914465 | 0 | 0 |
| Vmn1r229 | chr17:20951458-20952379 | 0 | 0 |
| Vmn1r230 | chr17:20983514-20984465 | 0 | 0 |
| Vmn1r231 | chr17:21026679-21027615 | 0 | 0 |
| Vmn1r232 | chr17:21050168-21051327 | 0 | 0 |
| Vmn1r233 | chr17:21130690-21131650 | 0 | 0 |
| Vmn1r234 | chr17:21365789-21366779 | 0 | 0 |
| Vmn1r235 | chr17:21397390-21399827 | 0 | 0 |
| Vmn1r236 | chr17:21423496-21424617 | 0 | 0 |
| Vmn1r237 | chr17:21450980-21451850 | 0 | 0 |
| Vmn2r111 | chr17:22684907-22710240 | 0 | 0 |
| Vmn2r112 | chr17:22738114-22756100 | 0 | 0 |
| Vmn2r114 | chr17:23427900-23449280 | 0 | 0 |
| Vmn2r116 | chr17:23521769-23538831 | 0 | 0 |
| Zscan10  | chr17:23737822-23747986 | 0 | 0 |
| Mmp25    | chr17:23766424-23782236 | 0 | 0 |
| Prss21   | chr17:24005038-24010080 | 0 | 0 |
| Dcpp1    | chr17:24017842-24019820 | 0 | 0 |
| Dcpp2    | chr17:24035688-24037754 | 0 | 0 |
| Dcpp3    | chr17:24054424-24056408 | 0 | 0 |

|               |                         |   |   |
|---------------|-------------------------|---|---|
| Mir5134       | chr17:24371471-24371549 | 0 | 0 |
| Npw           | chr17:24794274-24795370 | 0 | 0 |
| Tmem204       | chr17:25194646-25218059 | 0 | 0 |
| Ptx4          | chr17:25257704-25262213 | 0 | 0 |
| Prss34        | chr17:25435338-25437106 | 0 | 0 |
| Prss28        | chr17:25445590-25448821 | 0 | 0 |
| Prss29        | chr17:25455598-25459629 | 0 | 0 |
| Tpsab1        | chr17:25480189-25482507 | 0 | 0 |
| Tpsb2         | chr17:25503277-25505037 | 0 | 0 |
| Sstr5         | chr17:25626819-25634233 | 0 | 0 |
| Nkx2-5        | chr17:26975609-26978510 | 0 | 0 |
| Mir3083       | chr17:27085000-27085064 | 0 | 0 |
| Tulp1         | chr17:28488463-28502088 | 0 | 0 |
| 4930511111Rik | chr17:28667805-28675920 | 0 | 0 |
| Gm749         | chr17:28686431-28689563 | 0 | 0 |
| Clps          | chr17:28695158-28697659 | 0 | 0 |
| Tmem217       | chr17:29662962-29686538 | 0 | 0 |
| Umodl1        | chr17:31091627-31147655 | 0 | 0 |
| Tff3          | chr17:31262250-31266556 | 0 | 0 |
| Tff1          | chr17:31298340-31301998 | 0 | 0 |
| Tmprss3       | chr17:31316211-31335919 | 0 | 0 |
| Ubash3a       | chr17:31345010-31379348 | 0 | 0 |
| A530088E08Rik | chr17:32539958-32541753 | 0 | 0 |
| Pglyrp2       | chr17:32550044-32557920 | 0 | 0 |
| Cyp4f40       | chr17:32796427-32813425 | 0 | 0 |
| Cyp4f14       | chr17:33042014-33054287 | 0 | 0 |
| 4921501E09Rik | chr17:33201087-33205003 | 0 | 0 |
| Morc2b        | chr17:33272534-33276628 | 0 | 0 |
| Olfr63        | chr17:33405670-33406621 | 0 | 0 |
| Actl9         | chr17:33569843-33571212 | 0 | 0 |
| Adamts10      | chr17:33661140-33690727 | 0 | 0 |
| Myo1f         | chr17:33692651-33744709 | 0 | 0 |
| Mir219-1      | chr17:34161927-34162037 | 0 | 0 |
| H2-Ob         | chr17:34375849-34382853 | 0 | 0 |
| H2-Eb2        | chr17:34462619-34478355 | 0 | 0 |
| H2-Ea-ps      | chr17:34479156-34481590 | 0 | 0 |
| Btnl3         | chr17:34514076-34522973 | 0 | 0 |
| Btn3a3        | chr17:34605986-34612882 | 0 | 0 |
| Btnl5         | chr17:34624350-34634374 | 0 | 0 |
| Btnl6         | chr17:34644879-34654297 | 0 | 0 |
| Cyp21a1       | chr17:34938292-34941371 | 0 | 0 |
| Snord52       | chr17:35087894-35087953 | 0 | 0 |
| Psors1c2      | chr17:35670145-35671592 | 0 | 0 |
| Sfta2         | chr17:35786652-35787514 | 0 | 0 |
| 4833427F10Rik | chr17:35909394-35917632 | 0 | 0 |
| Mir1894       | chr17:36054833-36054914 | 0 | 0 |
| Mir877        | chr17:36097674-36097759 | 0 | 0 |
| H2-BI         | chr17:36217133-36221194 | 0 | 0 |
| 2410017I17Rik | chr17:36281962-36299319 | 0 | 0 |
| H2-T3         | chr17:36322515-36327096 | 0 | 0 |
| H2-M10.1      | chr17:36459804-36463095 | 0 | 0 |
| H2-M10.3      | chr17:36501948-36505362 | 0 | 0 |



|               |                         |   |   |
|---------------|-------------------------|---|---|
| Gm20410       | chr17:38691136-38697566 | 0 | 0 |
| Esp24         | chr17:39173639-39177172 | 0 | 0 |
| Gm20581       | chr17:39210635-39213982 | 0 | 0 |
| Gm20579       | chr17:39543303-39547937 | 0 | 0 |
| Gm4345        | chr17:39673086-39677792 | 0 | 0 |
| Gm9041        | chr17:39777901-39782612 | 0 | 0 |
| Esp38         | chr17:40087464-40092232 | 0 | 0 |
| Pgk2          | chr17:40343962-40345554 | 0 | 0 |
| Gm17495       | chr17:40656970-40667651 | 0 | 0 |
| Gm5494        | chr17:40698455-40702573 | 0 | 0 |
| Gm20580       | chr17:40735542-40739566 | 0 | 0 |
| Esp3          | chr17:40769023-40774009 | 0 | 0 |
| Gm6084        | chr17:40864068-40868731 | 0 | 0 |
| Rhag          | chr17:40948097-40977703 | 0 | 0 |
| 3110082D06Rik | chr17:42452895-42644690 | 0 | 0 |
| Gpr116        | chr17:43526414-43596506 | 0 | 0 |
| Mep1a         | chr17:43611277-43639722 | 0 | 0 |
| Gm7325        | chr17:45737915-45739051 | 0 | 0 |
| 1600014C23Rik | chr17:45869812-45870793 | 0 | 0 |
| Mir693        | chr17:46368479-46368568 | 0 | 0 |
| Pgc           | chr17:47863790-47871427 | 0 | 0 |
| 1700122O11Rik | chr17:48173694-48175243 | 0 | 0 |
| 1700067P10Rik | chr17:48226581-48227870 | 0 | 0 |
| 9830107B12Rik | chr17:48262554-48283257 | 0 | 0 |
| A530064D06Rik | chr17:48288845-48304207 | 0 | 0 |
| Trem3         | chr17:48386943-48398207 | 0 | 0 |
| Trem4         | chr17:48403660-48414724 | 0 | 0 |
| B430306N03Rik | chr17:48455486-48465836 | 0 | 0 |
| Trem2         | chr17:48485725-48491598 | 0 | 0 |
| Trem1         | chr17:48499240-48506471 | 0 | 0 |
| Tspo2         | chr17:48587759-48590826 | 0 | 0 |
| Unc5c         | chr17:48594225-48608009 | 0 | 0 |
| 1700008K24Rik | chr17:49251588-49252858 | 0 | 0 |
| Plcl2         | chr17:50648871-50827819 | 0 | 0 |
| C330011F03    | chr17:51564533-51587594 | 0 | 0 |
| Gm20098       | chr17:52022051-52104582 | 0 | 0 |
| 4932415M13Rik | chr17:53863075-53865058 | 0 | 0 |
| Sult1c2       | chr17:53968961-53985283 | 0 | 0 |
| Slc5a7        | chr17:54412914-54438359 | 0 | 0 |
| 1700025K24Rik | chr17:54491907-54509399 | 0 | 0 |
| Vmn2r118      | chr17:55731638-55763970 | 0 | 0 |
| Emr4          | chr17:55889248-55992927 | 0 | 0 |
| Lrg1          | chr17:56259100-56261369 | 0 | 0 |
| Mir7b         | chr17:56382410-56382521 | 0 | 0 |
| Arrdc5        | chr17:56433533-56439709 | 0 | 0 |
| Znrf4         | chr17:56650670-56651906 | 0 | 0 |
| Acsbg2        | chr17:56982526-57013870 | 0 | 0 |
| Slc25a41      | chr17:57172194-57181077 | 0 | 0 |
| Cd70          | chr17:57285419-57289200 | 0 | 0 |
| Vmn2r120      | chr17:57648205-57684737 | 0 | 0 |
| Cntnap5c      | chr17:57908992-58549765 | 0 | 0 |
| 2610034M16Rik | chr17:59018230-59130798 | 0 | 0 |

|               |                         |   |   |
|---------------|-------------------------|---|---|
| Lrrc30        | chr17:67980304-67982063 | 0 | 0 |
| L3mbtl4       | chr17:68623136-69129426 | 0 | 0 |
| Snord92       | chr17:71980618-71980701 | 0 | 0 |
| Snord53       | chr17:71990228-71990296 | 0 | 0 |
| Vit           | chr17:78907402-79026749 | 0 | 0 |
| 4930429F11Rik | chr17:79874963-79877225 | 0 | 0 |
| Gm10494       | chr17:79905388-79909826 | 0 | 0 |
| Ttc39d        | chr17:80615253-80617276 | 0 | 0 |
| Gm19689       | chr17:83432931-83477565 | 0 | 0 |
| Haao          | chr17:84230693-84246130 | 0 | 0 |
| 4933433H22Rik | chr17:84477999-84489215 | 0 | 0 |
| Six3os1       | chr17:86001271-86017736 | 0 | 0 |
| Six3          | chr17:86020173-86025531 | 0 | 0 |
| C330024C12Rik | chr17:87591555-87594282 | 0 | 0 |
| Lhcgr         | chr17:89140888-89191316 | 0 | 0 |
| Fshr          | chr17:89384291-89600015 | 0 | 0 |
| 4933400B14Rik | chr17:89719566-89726673 | 0 | 0 |
| Gm4719        | chr17:89778580-89784333 | 0 | 0 |
| Adcyap1       | chr17:93598761-93604829 | 0 | 0 |
| Gm10556       | chr18:4812483-4850957   | 0 | 0 |
| Gm10125       | chr18:5491498-5592435   | 0 | 0 |
| Zeb1          | chr18:5591857-5775466   | 0 | 0 |
| Mir1893       | chr18:6490561-6490644   | 0 | 0 |
| 4921524L21Rik | chr18:6603630-6638964   | 0 | 0 |
| Gjd4          | chr18:9278604-9282807   | 0 | 0 |
| Cetn1         | chr18:9618416-9619467   | 0 | 0 |
| Mir133a-1     | chr18:10782906-10782974 | 0 | 0 |
| Mir1a-2       | chr18:10785478-10785550 | 0 | 0 |
| Gata6         | chr18:11052507-11085633 | 0 | 0 |
| Mir1901       | chr18:11998869-11998947 | 0 | 0 |
| Mir1948       | chr18:12873319-12873404 | 0 | 0 |
| Hrh4          | chr18:13165498-13181391 | 0 | 0 |
| Zfp521        | chr18:13845522-14131242 | 0 | 0 |
| 8430422H06Rik | chr18:14390814-14437051 | 0 | 0 |
| Psm8          | chr18:14864659-14920808 | 0 | 0 |
| 4921533I20Rik | chr18:17392991-17393991 | 0 | 0 |
| 4930545E07Rik | chr18:17727254-17739499 | 0 | 0 |
| Mep1b         | chr18:21230844-21258700 | 0 | 0 |
| 4921528I01Rik | chr18:21969397-22329897 | 0 | 0 |
| Mir187        | chr18:24587610-24587671 | 0 | 0 |
| 4930474G06Rik | chr18:28718664-29156677 | 0 | 0 |
| 4930578E11Rik | chr18:29556369-29656070 | 0 | 0 |
| 4930527G23Rik | chr18:29601853-29625761 | 0 | 0 |
| Rit2          | chr18:31133967-31476782 | 0 | 0 |
| Proc          | chr18:32282779-32299224 | 0 | 0 |
| A830052D11Rik | chr18:32518710-32537938 | 0 | 0 |
| Gypc          | chr18:32687973-32719688 | 0 | 0 |
| 4930455D15Rik | chr18:32823295-32996941 | 0 | 0 |
| Wnt8a         | chr18:34701981-34707715 | 0 | 0 |
| Gfra3         | chr18:34849556-34880041 | 0 | 0 |
| Mir1949       | chr18:35714220-35714290 | 0 | 0 |
| Snora74a      | chr18:35716683-35716881 | 0 | 0 |

|               |                         |   |   |
|---------------|-------------------------|---|---|
| 4930471G03Rik | chr18:36265856-36269608 | 0 | 0 |
| Pcdh12        | chr18:38426745-38444055 | 0 | 0 |
| Pabpc2        | chr18:39933150-39935736 | 0 | 0 |
| Pou4f3        | chr18:42554250-42555747 | 0 | 0 |
| Spink3        | chr18:43887722-43896891 | 0 | 0 |
| Scgb3a2       | chr18:43923980-43927053 | 0 | 0 |
| Spink14       | chr18:44187522-44191862 | 0 | 0 |
| Spink6        | chr18:44231046-44243264 | 0 | 0 |
| Spink12       | chr18:44264176-44268197 | 0 | 0 |
| Gm10267       | chr18:44316057-44318957 | 0 | 0 |
| Spinkl        | chr18:44326011-44334727 | 0 | 0 |
| Spink11       | chr18:44349698-44355831 | 0 | 0 |
| Npy6r         | chr18:44429780-44437354 | 0 | 0 |
| 1700018A14Rik | chr18:46358674-46359385 | 0 | 0 |
| 4833403I15Rik | chr18:47009692-47065100 | 0 | 0 |
| Gm949         | chr18:47081468-47093876 | 0 | 0 |
| 9130209A04Rik | chr18:47612321-47630522 | 0 | 0 |
| Gm5095        | chr18:47697388-47878290 | 0 | 0 |
| G630055G22Rik | chr18:48082494-48267634 | 0 | 0 |
| 1700044K03Rik | chr18:49682942-49684094 | 0 | 0 |
| 1700065O20Rik | chr18:49962985-49977610 | 0 | 0 |
| Fam170a       | chr18:50438022-50442673 | 0 | 0 |
| Hdhd1a        | chr18:50727309-50728353 | 0 | 0 |
| Prr16         | chr18:51277551-51464295 | 0 | 0 |
| Ftmt          | chr18:52491189-52492650 | 0 | 0 |
| Lox           | chr18:52676891-52689362 | 0 | 0 |
| Gykl1         | chr18:52853332-52855247 | 0 | 0 |
| 9430076G02Rik | chr18:54581948-54612948 | 0 | 0 |
| 9330117O12    | chr18:54771397-54799524 | 0 | 0 |
| Ctxn3         | chr18:57628139-57637788 | 0 | 0 |
| 1700066O22Rik | chr18:57664075-57693406 | 0 | 0 |
| 1700011I03Rik | chr18:57693479-57890719 | 0 | 0 |
| 2210409D07Rik | chr18:57791732-57798239 | 0 | 0 |
| Slc27a6       | chr18:58715893-58772523 | 0 | 0 |
| Adamts19      | chr18:58996417-59213332 | 0 | 0 |
| Gm4841        | chr18:60427954-60432921 | 0 | 0 |
| ligp1         | chr18:60535682-60552283 | 0 | 0 |
| Mir5107       | chr18:60971729-60971817 | 0 | 0 |
| Cdx1          | chr18:61178515-61195853 | 0 | 0 |
| Pdgfrb        | chr18:61204803-61244721 | 0 | 0 |
| A530050N04Rik | chr18:61629878-61644261 | 0 | 0 |
| Mir145        | chr18:61807478-61807548 | 0 | 0 |
| Mir143        | chr18:61808849-61808912 | 0 | 0 |
| Spink7        | chr18:62752066-62755918 | 0 | 0 |
| Spink13       | chr18:62767193-62901041 | 0 | 0 |
| 1700091E21Rik | chr18:64317377-64436834 | 0 | 0 |
| St8sia3       | chr18:64414012-64435798 | 0 | 0 |
| Mir122a       | chr18:65408514-65408580 | 0 | 0 |
| Alpk2         | chr18:65425185-65553542 | 0 | 0 |
| Rax           | chr18:66094292-66098743 | 0 | 0 |
| Cplx4         | chr18:66115375-66129832 | 0 | 0 |
| Mir694        | chr18:66378917-66378987 | 0 | 0 |



|               |                         |   |   |
|---------------|-------------------------|---|---|
| Mc4r          | chr18:67017361-67020126 | 0 | 0 |
| Gm19784       | chr18:67084415-67109615 | 0 | 0 |
| B430212C06Rik | chr18:67480862-67503757 | 0 | 0 |
| Cidea         | chr18:67503217-67527448 | 0 | 0 |
| Mc5r          | chr18:68497256-68499365 | 0 | 0 |
| Mc2r          | chr18:68566560-68588913 | 0 | 0 |
| D730045A05Rik | chr18:74177560-74179742 | 0 | 0 |
| Scarna17      | chr18:74938047-74938109 | 0 | 0 |
| Snord58b      | chr18:75160721-75160776 | 0 | 0 |
| Skor2         | chr18:77095143-77139081 | 0 | 0 |
| Loxhd1        | chr18:77520696-77680996 | 0 | 0 |
| 4930465K10Rik | chr18:77952922-77954184 | 0 | 0 |
| Siglec15      | chr18:78240352-78254007 | 0 | 0 |
| Slc14a1       | chr18:78296829-78338858 | 0 | 0 |
| Gm2176        | chr18:80738630-80741285 | 0 | 0 |
| Sall3         | chr18:81163112-81183317 | 0 | 0 |
| Mir5127       | chr18:82188748-82188819 | 0 | 0 |
| Galr1         | chr18:82561887-82576169 | 0 | 0 |
| Mir5112       | chr18:82889672-82889732 | 0 | 0 |
| 2210420H20Rik | chr18:82923896-82928431 | 0 | 0 |
| 4921531P14Rik | chr18:83462183-83495276 | 0 | 0 |
| Cndp1         | chr18:84779900-84819487 | 0 | 0 |
| Fam69c        | chr18:84889633-84909828 | 0 | 0 |
| Cbln2         | chr18:86882439-86887675 | 0 | 0 |
| Cd226         | chr18:89366818-89439719 | 0 | 0 |
| Dok6          | chr18:89470526-89938528 | 0 | 0 |
| 1700030N03Rik | chr19:3153798-3197703   | 0 | 0 |
| Tbx10         | chr19:3992751-3999512   | 0 | 0 |
| BC021614      | chr19:4057486-4059294   | 0 | 0 |
| Cabp2         | chr19:4082487-4087339   | 0 | 0 |
| 2010003K11Rik | chr19:4496787-4498583   | 0 | 0 |
| Actn3         | chr19:4861222-4877884   | 0 | 0 |
| Npas4         | chr19:4984354-4989971   | 0 | 0 |
| Cd248         | chr19:5068077-5070639   | 0 | 0 |
| Tmem151a      | chr19:5079336-5085477   | 0 | 0 |
| Catsper1      | chr19:5335740-5344153   | 0 | 0 |
| Naaladl1      | chr19:6105797-6115555   | 0 | 0 |
| Gpha2         | chr19:6226400-6227768   | 0 | 0 |
| Mir194-2      | chr19:6264642-6264728   | 0 | 0 |
| Mir192        | chr19:6264843-6264932   | 0 | 0 |
| Rasgrp2       | chr19:6400582-6415216   | 0 | 0 |
| Slc22a12      | chr19:6535855-6543070   | 0 | 0 |
| Mir5046       | chr19:6904375-6904434   | 0 | 0 |
| Ccdc88b       | chr19:6919112-6932701   | 0 | 0 |
| 1700019N12Rik | chr19:6996915-6999870   | 0 | 0 |
| Slc22a19      | chr19:7747565-7785800   | 0 | 0 |
| Slc22a26      | chr19:7856472-7877157   | 0 | 0 |
| Slc22a27      | chr19:7938878-8040517   | 0 | 0 |
| Slc22a28      | chr19:8136698-8206472   | 0 | 0 |
| Slc22a8       | chr19:8665743-8686325   | 0 | 0 |
| Slc22a6       | chr19:8692485-8702789   | 0 | 0 |
| 9830166K06Rik | chr19:8726285-8737825   | 0 | 0 |

|               |                         |   |   |
|---------------|-------------------------|---|---|
| Chrm1         | chr19:8738494-8758092   | 0 | 0 |
| Mir5136       | chr19:8963188-8963264   | 0 | 0 |
| Rab3il1       | chr19:10092717-10110076 | 0 | 0 |
| Vwce          | chr19:10708722-10739700 | 0 | 0 |
| 4930524O05Rik | chr19:10720183-10722543 | 0 | 0 |
| Pga5          | chr19:10743446-10752561 | 0 | 0 |
| Cd6           | chr19:10863828-10904548 | 0 | 0 |
| Ms4a10        | chr19:11036784-11049160 | 0 | 0 |
| Ms4a15        | chr19:11052796-11067740 | 0 | 0 |
| Ms4a8a        | chr19:11141960-11155593 | 0 | 0 |
| 1700017D01Rik | chr19:11171305-11205368 | 0 | 0 |
| 1700025F22Rik | chr19:11214172-11239810 | 0 | 0 |
| Ms4a13        | chr19:11243907-11271213 | 0 | 0 |
| Ms4a1         | chr19:11325092-11340641 | 0 | 0 |
| Ms4a5         | chr19:11348355-11358303 | 0 | 0 |
| Ms4a4c        | chr19:11482150-11501736 | 0 | 0 |
| Ms4a4b        | chr19:11518047-11538038 | 0 | 0 |
| Gm8369        | chr19:11566527-11587067 | 0 | 0 |
| Ms4a4d        | chr19:11611338-11632956 | 0 | 0 |
| Ms4a6d        | chr19:11661095-11679294 | 0 | 0 |
| Ms4a2         | chr19:11691682-11698133 | 0 | 0 |
| Ms4a3         | chr19:11703986-11715324 | 0 | 0 |
| Plac1l        | chr19:11721773-11735049 | 0 | 0 |
| Oosp1         | chr19:11741949-11765541 | 0 | 0 |
| Gm97          | chr19:11771544-11786348 | 0 | 0 |
| Gif           | chr19:11822048-11837937 | 0 | 0 |
| Olfr1417      | chr19:11902566-11903514 | 0 | 0 |
| Olfr1418      | chr19:11929484-11930441 | 0 | 0 |
| Olfr1419      | chr19:11944672-11945704 | 0 | 0 |
| Olfr1423      | chr19:12110297-12111230 | 0 | 0 |
| Olfr1424      | chr19:12133298-12134240 | 0 | 0 |
| Olfr1425      | chr19:12148184-12149120 | 0 | 0 |
| Olfr1426      | chr19:12162099-12166337 | 0 | 0 |
| Olfr1427      | chr19:12173191-12174127 | 0 | 0 |
| Olfr1428      | chr19:12183089-12184034 | 0 | 0 |
| Olfr76        | chr19:12194210-12195164 | 0 | 0 |
| Olfr1431      | chr19:12284057-12284996 | 0 | 0 |
| Olfr262       | chr19:12315210-12316149 | 0 | 0 |
| Olfr235       | chr19:12342721-12343660 | 0 | 0 |
| Olfr1433      | chr19:12354343-12358478 | 0 | 0 |
| Olfr1434      | chr19:12357539-12358478 | 0 | 0 |
| Olfr1436      | chr19:12372672-12373620 | 0 | 0 |
| Olfr1437      | chr19:12396376-12397315 | 0 | 0 |
| Olfr1440      | chr19:12468754-12469702 | 0 | 0 |
| Olfr1441      | chr19:12496800-12497757 | 0 | 0 |
| Pfpl          | chr19:12502394-12506600 | 0 | 0 |
| Olfr1442      | chr19:12748668-12749733 | 0 | 0 |
| Olfr1443      | chr19:12752655-12758335 | 0 | 0 |
| Keg1          | chr19:12770279-12794386 | 0 | 0 |
| Olfr1444      | chr19:12936266-12937226 | 0 | 0 |
| Olfr1445      | chr19:12958372-12959317 | 0 | 0 |
| Olfr1446      | chr19:12964138-12965065 | 0 | 0 |

|               |                         |   |   |
|---------------|-------------------------|---|---|
| Olfr1447      | chr19:12975338-12976268 | 0 | 0 |
| Olfr1448      | chr19:12993852-12994797 | 0 | 0 |
| Olfr1449      | chr19:13009229-13010174 | 0 | 0 |
| Olfr1450      | chr19:13028080-13029058 | 0 | 0 |
| Olfr1451      | chr19:13073477-13074410 | 0 | 0 |
| Olfr1453      | chr19:13101893-13102817 | 0 | 0 |
| Olfr1454      | chr19:13137902-13138826 | 0 | 0 |
| Olfr1457      | chr19:13169182-13170136 | 0 | 0 |
| Olfr1459      | chr19:13220223-13221147 | 0 | 0 |
| Olfr1461      | chr19:13239505-13240444 | 0 | 0 |
| Olfr1462      | chr19:13265158-13266082 | 0 | 0 |
| Olfr1463      | chr19:13308741-13309674 | 0 | 0 |
| Olfr1465      | chr19:13387849-13388773 | 0 | 0 |
| Olfr1466      | chr19:13416249-13417182 | 0 | 0 |
| Olfr1467      | chr19:13439119-13440046 | 0 | 0 |
| Olfr1469      | chr19:13485060-13485990 | 0 | 0 |
| Olfr1471      | chr19:13519503-13520448 | 0 | 0 |
| Olfr1472      | chr19:13528060-13529005 | 0 | 0 |
| Olfr1474      | chr19:13545461-13546406 | 0 | 0 |
| Olfr1475      | chr19:13553741-13554686 | 0 | 0 |
| Olfr1477      | chr19:13575035-13577782 | 0 | 0 |
| Olfr1480      | chr19:13604164-13605112 | 0 | 0 |
| Olfr1484      | chr19:13659795-13660743 | 0 | 0 |
| Olfr1487      | chr19:13693653-13694601 | 0 | 0 |
| Olfr1489      | chr19:13707602-13708544 | 0 | 0 |
| Olfr1490      | chr19:13728935-13729886 | 0 | 0 |
| Olfr1491      | chr19:13779318-13780278 | 0 | 0 |
| Olfr1494      | chr19:13823597-13824545 | 0 | 0 |
| Olfr1495      | chr19:13842833-13843793 | 0 | 0 |
| Olfr1496      | chr19:13855037-13856104 | 0 | 0 |
| Olfr1497      | chr19:13869154-13870099 | 0 | 0 |
| Olfr1499      | chr19:13889133-13890078 | 0 | 0 |
| Olfr1500      | chr19:13901948-13902884 | 0 | 0 |
| Olfr1501      | chr19:13912713-13913661 | 0 | 0 |
| Olfr1502      | chr19:13936284-13937235 | 0 | 0 |
| Olfr1505      | chr19:13993511-13994462 | 0 | 0 |
| Foxb2         | chr19:16946805-16948320 | 0 | 0 |
| Rorb          | chr19:19005098-19185686 | 0 | 0 |
| E030003E18Rik | chr19:20567204-20630900 | 0 | 0 |
| C730002L08Rik | chr19:20609016-20626820 | 0 | 0 |
| Tmc1          | chr19:20857947-21028692 | 0 | 0 |
| Mir204        | chr19:22825094-22825162 | 0 | 0 |
| 1700028P14Rik | chr19:23633249-23727302 | 0 | 0 |
| E030010A14Rik | chr19:24748497-24754151 | 0 | 0 |
| Snora19       | chr19:25016727-25016781 | 0 | 0 |
| Dmrt1         | chr19:25580195-25678818 | 0 | 0 |
| Gm815         | chr19:26960414-26963137 | 0 | 0 |
| Kcnv2         | chr19:27397108-27411669 | 0 | 0 |
| Mir101b       | chr19:29209768-29209865 | 0 | 0 |
| Rln1          | chr19:29406244-29409160 | 0 | 0 |
| Pdcd1lg2      | chr19:29485408-29547417 | 0 | 0 |
| Trpd52l3      | chr19:30078279-30080510 | 0 | 0 |

|               |                         |   |   |
|---------------|-------------------------|---|---|
| Mbl2          | chr19:30307446-30314172 | 0 | 0 |
| Dkk1          | chr19:30620373-30623986 | 0 | 0 |
| A1cf          | chr19:31943250-32023896 | 0 | 0 |
| Lipf          | chr19:34035737-34051303 | 0 | 0 |
| Lipn          | chr19:34141847-34159408 | 0 | 0 |
| Ch25h         | chr19:34548273-34549625 | 0 | 0 |
| Mir107        | chr19:34895176-34895263 | 0 | 0 |
| Htr7          | chr19:36033218-36131850 | 0 | 0 |
| Ankrd1        | chr19:36186454-36194334 | 0 | 0 |
| Hhex          | chr19:37509330-37515221 | 0 | 0 |
| Cyp26c1       | chr19:37760169-37767797 | 0 | 0 |
| Cyp26a1       | chr19:37772297-37776026 | 0 | 0 |
| Pde6c         | chr19:38207270-38258441 | 0 | 0 |
| Cyp2c55       | chr19:39081508-39117177 | 0 | 0 |
| Cyp2c53-ps    | chr19:39303743-39349227 | 0 | 0 |
| Cyp2c29       | chr19:39361574-39405203 | 0 | 0 |
| Cyp2c38       | chr19:39464045-39537565 | 0 | 0 |
| Cyp2c39       | chr19:39585311-39643019 | 0 | 0 |
| Cyp2c67       | chr19:39683348-39723532 | 0 | 0 |
| Cyp2c68       | chr19:39763325-39815591 | 0 | 0 |
| Cyp2c40       | chr19:39841562-39887304 | 0 | 0 |
| Cyp2c37       | chr19:40066913-40086733 | 0 | 0 |
| Cyp2c54       | chr19:40112429-40148303 | 0 | 0 |
| Cyp2c50       | chr19:40164168-40188445 | 0 | 0 |
| Cyp2c70       | chr19:40227850-40261776 | 0 | 0 |
| E030044B06Rik | chr19:40942805-40957129 | 0 | 0 |
| Dntt          | chr19:41103764-41134015 | 0 | 0 |
| Opalin        | chr19:41137909-41151603 | 0 | 0 |
| Gm19424       | chr19:41821450-41824587 | 0 | 0 |
| Ankrd2        | chr19:42110527-42119600 | 0 | 0 |
| Mir3085       | chr19:42354571-42354660 | 0 | 0 |
| Cyp2c44       | chr19:44079511-44103737 | 0 | 0 |
| Mir5114       | chr19:44377660-44377721 | 0 | 0 |
| Wnt8b         | chr19:44567961-44588763 | 0 | 0 |
| Pax2          | chr19:44831883-44912359 | 0 | 0 |
| 1700039E22Rik | chr19:44902982-44910428 | 0 | 0 |
| Lbx1          | chr19:45308217-45309726 | 0 | 0 |
| Fgf8          | chr19:45811287-45817374 | 0 | 0 |
| Elovl3        | chr19:46206388-46210184 | 0 | 0 |
| Pitx3         | chr19:46210175-46222815 | 0 | 0 |
| Mir146b       | chr19:46417251-46417360 | 0 | 0 |
| Ina           | chr19:47089187-47098836 | 0 | 0 |
| Ins1          | chr19:52338812-52339948 | 0 | 0 |
| Tectb         | chr19:55255374-55270803 | 0 | 0 |
| 4930449E18Rik | chr19:57348449-57351542 | 0 | 0 |
| 6720468P15Rik | chr19:57583053-57587278 | 0 | 0 |
| Gm10007       | chr19:58370693-58374838 | 0 | 0 |
| 1700011F14Rik | chr19:58586491-58627575 | 0 | 0 |
| 1810007D17Rik | chr19:58680818-58704243 | 0 | 0 |
| Pnlip         | chr19:58744854-58756278 | 0 | 0 |
| Pnliprp1      | chr19:58803376-58818659 | 0 | 0 |
| Pnliprp2      | chr19:58834212-58852024 | 0 | 0 |

|               |                         |   |   |
|---------------|-------------------------|---|---|
| 1700019N19Rik | chr19:58860292-58868904 | 0 | 0 |
| Mir3086       | chr19:58986162-58986249 | 0 | 0 |
| Vax1          | chr19:59240676-59244519 | 0 | 0 |
| Kcnk18        | chr19:59294137-59311860 | 0 | 0 |
| Emx2os        | chr19:59499593-59533125 | 0 | 0 |
| Emx2          | chr19:59533179-59539847 | 0 | 0 |
| 2700089I24Rik | chr19:59567625-59635294 | 0 | 0 |
| Prlhr         | chr19:60542635-60544207 | 0 | 0 |
| Snora19       | chr19:60850232-60850288 | 0 | 0 |
| Olah          | chr2:3259259-3283841    | 0 | 0 |
| Ucma          | chr2:4897167-4906794    | 0 | 0 |
| Mcm10         | chr2:4911769-4933837    | 0 | 0 |
| 5031426D15Rik | chr2:6843747-6849768    | 0 | 0 |
| 1700061F12Rik | chr2:9111141-9119111    | 0 | 0 |
| Gata3         | chr2:9778704-9800227    | 0 | 0 |
| 4930412O13Rik | chr2:9802872-9808394    | 0 | 0 |
| 9230102O04Rik | chr2:9804667-9811167    | 0 | 0 |
| Itih2         | chr2:10016217-10052310  | 0 | 0 |
| Mir669e       | chr2:10389121-10389240  | 0 | 0 |
| Mir669b       | chr2:10389416-10389513  | 0 | 0 |
| Mir4660       | chr2:10394166-10394250  | 0 | 0 |
| Mir669a-3     | chr2:10396059-10396168  | 0 | 0 |
| Mir669k       | chr2:10396926-10397053  | 0 | 0 |
| Mir467a-4     | chr2:10397968-10398050  | 0 | 0 |
| Mir467a-1     | chr2:10397972-10398045  | 0 | 0 |
| Mir669a-2     | chr2:10398477-10398572  | 0 | 0 |
| Mir669a-1     | chr2:10398479-10398576  | 0 | 0 |
| Mir669a-12    | chr2:10398483-10398570  | 0 | 0 |
| Mir669g       | chr2:10398776-10398899  | 0 | 0 |
| Mir669j       | chr2:10399536-10399657  | 0 | 0 |
| Mir467a-9     | chr2:10400424-10400507  | 0 | 0 |
| Mir467a-1     | chr2:10400429-10400502  | 0 | 0 |
| Mir669a-2     | chr2:10400935-10401030  | 0 | 0 |
| Mir669a-1     | chr2:10400937-10401034  | 0 | 0 |
| Mir669a-5     | chr2:10400941-10401028  | 0 | 0 |
| Mir467b       | chr2:10402874-10402947  | 0 | 0 |
| Mir669a-2     | chr2:10403381-10403476  | 0 | 0 |
| Mir669a-1     | chr2:10403383-10403480  | 0 | 0 |
| Mir669a-9     | chr2:10403387-10403474  | 0 | 0 |
| Mir467a-6     | chr2:10405304-10405387  | 0 | 0 |
| Mir669a-2     | chr2:10405816-10405911  | 0 | 0 |
| Mir669a-1     | chr2:10405818-10405915  | 0 | 0 |
| Mir669a-10    | chr2:10405822-10405909  | 0 | 0 |
| Mir467a-2     | chr2:10407761-10407844  | 0 | 0 |
| Mir467a-1     | chr2:10407766-10407839  | 0 | 0 |
| Mir669a-2     | chr2:10408273-10408368  | 0 | 0 |
| Mir669a-1     | chr2:10408275-10408372  | 0 | 0 |
| Mir669a-4     | chr2:10408279-10408366  | 0 | 0 |
| Mir467a-2     | chr2:10410225-10410308  | 0 | 0 |
| Mir467a-1     | chr2:10410230-10410303  | 0 | 0 |
| Mir669p-1     | chr2:10410742-10410829  | 0 | 0 |
| Mir467a-10    | chr2:10412674-10412757  | 0 | 0 |

|               |                        |   |   |
|---------------|------------------------|---|---|
| Mir467a-1     | chr2:10412681-10412752 | 0 | 0 |
| Mir669a-2     | chr2:10413186-10413281 | 0 | 0 |
| Mir669a-1     | chr2:10413188-10413285 | 0 | 0 |
| Mir669a-10    | chr2:10413192-10413279 | 0 | 0 |
| Mir467a-7     | chr2:10415136-10415219 | 0 | 0 |
| Mir467a-1     | chr2:10415141-10415214 | 0 | 0 |
| Mir669a-2     | chr2:10415648-10415743 | 0 | 0 |
| Mir669a-1     | chr2:10415650-10415747 | 0 | 0 |
| Mir669a-11    | chr2:10415654-10415741 | 0 | 0 |
| Mir467a-9     | chr2:10417606-10417689 | 0 | 0 |
| Mir467a-1     | chr2:10417611-10417684 | 0 | 0 |
| Mir669p-1     | chr2:10418123-10418210 | 0 | 0 |
| Mir467a-9     | chr2:10420019-10420102 | 0 | 0 |
| Mir467a-1     | chr2:10420024-10420097 | 0 | 0 |
| Mir669a-2     | chr2:10420531-10420626 | 0 | 0 |
| Mir669a-1     | chr2:10420533-10420630 | 0 | 0 |
| Mir669a-6     | chr2:10420537-10420624 | 0 | 0 |
| Mir467a-7     | chr2:10422448-10422531 | 0 | 0 |
| Mir467a-1     | chr2:10422453-10422526 | 0 | 0 |
| Mir669a-2     | chr2:10422959-10423054 | 0 | 0 |
| Mir669a-1     | chr2:10422961-10423058 | 0 | 0 |
| Mir669a-11    | chr2:10422965-10423052 | 0 | 0 |
| Mir467a-10    | chr2:10424899-10424982 | 0 | 0 |
| Mir467a-1     | chr2:10424906-10424977 | 0 | 0 |
| Mir669a-1     | chr2:10425413-10425510 | 0 | 0 |
| Mir669a-12    | chr2:10425417-10425504 | 0 | 0 |
| Mir467d       | chr2:10429256-10429341 | 0 | 0 |
| Mir466        | chr2:10429544-10429617 | 0 | 0 |
| Mir669c       | chr2:10430922-10431031 | 0 | 0 |
| Mir669a-2     | chr2:10431790-10431887 | 0 | 0 |
| Mir297b       | chr2:10433293-10433402 | 0 | 0 |
| Mir669m-2     | chr2:10435060-10435158 | 0 | 0 |
| Mir669m-1     | chr2:10435061-10435155 | 0 | 0 |
| Mir466g       | chr2:10436221-10436301 | 0 | 0 |
| Mir297c       | chr2:10437446-10437543 | 0 | 0 |
| Mir297a-3     | chr2:10437446-10437548 | 0 | 0 |
| Mir669i       | chr2:10439230-10439357 | 0 | 0 |
| Mir669h       | chr2:10439781-10439906 | 0 | 0 |
| 8030442B05Rik | chr2:11259992-11320127 | 0 | 0 |
| Gm13293       | chr2:11261115-11265733 | 0 | 0 |
| Il2ra         | chr2:11564418-11614821 | 0 | 0 |
| Itga8         | chr2:12028286-12223547 | 0 | 0 |
| Mir511        | chr2:14182629-14182708 | 0 | 0 |
| 4930515L03Rik | chr2:16840304-16935353 | 0 | 0 |
| H2afb1        | chr2:17918048-17918573 | 0 | 0 |
| Ptf1a         | chr2:19367289-19369128 | 0 | 0 |
| 4921504E06Rik | chr2:19384463-19475537 | 0 | 0 |
| Gpr158        | chr2:21289193-21752169 | 0 | 0 |
| Mir3967       | chr2:22509802-22509870 | 0 | 0 |
| 4931423N10Rik | chr2:23062995-23122649 | 0 | 0 |
| Nxph2         | chr2:23176765-23257493 | 0 | 0 |
| Tbpl2         | chr2:23927240-23952115 | 0 | 0 |

|               |                        |   |   |
|---------------|------------------------|---|---|
| Il1f10        | chr2:24146715-24149340 | 0 | 0 |
| Slc34a3       | chr2:25084416-25089754 | 0 | 0 |
| Tmem210       | chr2:25143664-25144707 | 0 | 0 |
| Mir3087       | chr2:25298298-25298354 | 0 | 0 |
| Ptgds         | chr2:25322231-25325269 | 0 | 0 |
| Lcn12         | chr2:25346364-25349431 | 0 | 0 |
| Lcn8          | chr2:25508637-25511736 | 0 | 0 |
| Lcn5          | chr2:25513474-25517750 | 0 | 0 |
| Lcn6          | chr2:25532305-25537127 | 0 | 0 |
| Lcn10         | chr2:25538245-25541601 | 0 | 0 |
| Lcn13         | chr2:25555593-25558846 | 0 | 0 |
| Lcn11         | chr2:25632536-25635799 | 0 | 0 |
| Gm13539       | chr2:25640136-25642542 | 0 | 0 |
| Glt6d1        | chr2:25649486-25671356 | 0 | 0 |
| Lcn9          | chr2:25678672-25681057 | 0 | 0 |
| Sohlh1        | chr2:25698516-25702768 | 0 | 0 |
| Egfl7         | chr2:26436575-26448202 | 0 | 0 |
| Mir126        | chr2:26446876-26446949 | 0 | 0 |
| Lcn4          | chr2:26523193-26526802 | 0 | 0 |
| Tmem8c        | chr2:26917155-26927681 | 0 | 0 |
| Col5a1        | chr2:27741944-27895030 | 0 | 0 |
| Fcnb          | chr2:27931998-27940398 | 0 | 0 |
| F730016J06Rik | chr2:27977067-27979837 | 0 | 0 |
| Mir3088       | chr2:28588797-28588871 | 0 | 0 |
| Mir219-2      | chr2:29701150-29701247 | 0 | 0 |
| Mir3089       | chr2:30576729-30576813 | 0 | 0 |
| Prdm12        | chr2:31495556-31511315 | 0 | 0 |
| Qrfp          | chr2:31661687-31666038 | 0 | 0 |
| Lamc3         | chr2:31742800-31802055 | 0 | 0 |
| Mir199b       | chr2:32173979-32174089 | 0 | 0 |
| Eng           | chr2:32502114-32538189 | 0 | 0 |
| Mir2861       | chr2:32568326-32568408 | 0 | 0 |
| Mir3960       | chr2:32568419-32568492 | 0 | 0 |
| Lmx1b         | chr2:33420055-33496031 | 0 | 0 |
| C130021I20Rik | chr2:33496712-33501183 | 0 | 0 |
| 4930568D16Rik | chr2:35209737-35223249 | 0 | 0 |
| Gm13446       | chr2:35405053-35414222 | 0 | 0 |
| Olfr338       | chr2:36232297-36233218 | 0 | 0 |
| Mir684-1      | chr2:36245430-36245515 | 0 | 0 |
| Olfr339       | chr2:36276919-36277849 | 0 | 0 |
| Olfr340       | chr2:36308106-36309045 | 0 | 0 |
| Olfr341       | chr2:36334706-36335648 | 0 | 0 |
| Olfr342       | chr2:36382933-36383872 | 0 | 0 |
| Olfr344       | chr2:36424119-36425049 | 0 | 0 |
| Olfr345       | chr2:36495560-36496496 | 0 | 0 |
| Olfr346       | chr2:36543523-36544453 | 0 | 0 |
| Olfr347       | chr2:36589842-36590781 | 0 | 0 |
| Olfr348       | chr2:36642046-36642988 | 0 | 0 |
| Olfr50        | chr2:36648757-36649696 | 0 | 0 |
| Olfr3         | chr2:36667668-36668610 | 0 | 0 |
| Olfr350       | chr2:36705567-36706506 | 0 | 0 |
| Olfr351       | chr2:36714933-36715866 | 0 | 0 |

|               |                        |   |   |
|---------------|------------------------|---|---|
| Olfr352       | chr2:36725087-36726035 | 0 | 0 |
| Olfr353       | chr2:36745430-36746366 | 0 | 0 |
| Olfr354       | chr2:36762467-36763421 | 0 | 0 |
| Olfr355       | chr2:36782699-36783632 | 0 | 0 |
| Olfr356       | chr2:36792640-36793588 | 0 | 0 |
| Olfr357       | chr2:36852331-36853258 | 0 | 0 |
| Olfr358       | chr2:36860139-36861132 | 0 | 0 |
| Olfr360       | chr2:36923826-36924780 | 0 | 0 |
| Olfr361       | chr2:36940297-36941266 | 0 | 0 |
| Olfr362       | chr2:36960214-36961168 | 0 | 0 |
| Olfr365       | chr2:37056762-37057701 | 0 | 0 |
| Olfr366       | chr2:37075010-37075940 | 0 | 0 |
| Olfr367-ps    | chr2:37122470-37126907 | 0 | 0 |
| Olfr368       | chr2:37187268-37188252 | 0 | 0 |
| Snord90       | chr2:37255580-37255648 | 0 | 0 |
| Mir5128       | chr2:37543720-37543804 | 0 | 0 |
| Lhx2          | chr2:38206827-38225248 | 0 | 0 |
| Mir181a-2     | chr2:38708254-38708330 | 0 | 0 |
| Mir181b-2     | chr2:38709349-38709435 | 0 | 0 |
| Kynu          | chr2:43410848-43538235 | 0 | 0 |
| A430092G05Rik | chr2:43914757-43920844 | 0 | 0 |
| Mir5129       | chr2:44878619-44878697 | 0 | 0 |
| Gm13476       | chr2:44966657-44969604 | 0 | 0 |
| 1700019E08Rik | chr2:45552124-45553967 | 0 | 0 |
| A730015I17    | chr2:51097350-51151465 | 0 | 0 |
| Gm13490       | chr2:51512485-51587529 | 0 | 0 |
| Tnfaip6       | chr2:51893632-51912201 | 0 | 0 |
| 4930573O16Rik | chr2:52146521-52170760 | 0 | 0 |
| Rprm          | chr2:53936503-53937963 | 0 | 0 |
| Galnt13       | chr2:54288797-54970155 | 0 | 0 |
| BB557941      | chr2:56979887-57034165 | 0 | 0 |
| 4930555B11Rik | chr2:57034241-57040668 | 0 | 0 |
| Gm13546       | chr2:58016384-58029474 | 0 | 0 |
| Acvr1c        | chr2:58119863-58210169 | 0 | 0 |
| Gm13544       | chr2:58129189-58139313 | 0 | 0 |
| 5330411J11Rik | chr2:59220549-59224739 | 0 | 0 |
| Gcg           | chr2:62312586-62321710 | 0 | 0 |
| Scn7a         | chr2:66511482-66622967 | 0 | 0 |
| Gm1322        | chr2:67011890-67024269 | 0 | 0 |
| Xirp2         | chr2:67284058-67364663 | 0 | 0 |
| B3galt1       | chr2:67955769-67960747 | 0 | 0 |
| 4932414N04Rik | chr2:68495940-68586522 | 0 | 0 |
| G6pc2         | chr2:69058054-69066045 | 0 | 0 |
| Myo3b         | chr2:69877182-70267252 | 0 | 0 |
| Sp5           | chr2:70312979-70315783 | 0 | 0 |
| 8430437L04Rik | chr2:72541566-72567525 | 0 | 0 |
| 4930441J16Rik | chr2:74136996-74145774 | 0 | 0 |
| Evx2          | chr2:74493672-74497476 | 0 | 0 |
| Hoxd13        | chr2:74506366-74509655 | 0 | 0 |
| Hoxd12        | chr2:74513086-74515762 | 0 | 0 |
| Hoxd11        | chr2:74520449-74522195 | 0 | 0 |
| Hoxd10        | chr2:74530004-74533159 | 0 | 0 |



|               |                        |   |   |
|---------------|------------------------|---|---|
| Hoxd9         | chr2:74535819-74538265 | 0 | 0 |
| Hoxd8         | chr2:74543545-74545364 | 0 | 0 |
| 1700109F18Rik | chr2:74548100-74554187 | 0 | 0 |
| Hoxd3         | chr2:74550049-74586328 | 0 | 0 |
| Hoxd4         | chr2:74560034-74567216 | 0 | 0 |
| Mir10b        | chr2:74564126-74564194 | 0 | 0 |
| Hoxd1         | chr2:74601036-74603199 | 0 | 0 |
| 9430019J16Rik | chr2:75274113-75282236 | 0 | 0 |
| Cyct          | chr2:76191999-76198505 | 0 | 0 |
| Gm13944       | chr2:77300700-77318995 | 0 | 0 |
| Neurod1       | chr2:79292797-79296793 | 0 | 0 |
| Ppp1r1c       | chr2:79547936-79650470 | 0 | 0 |
| Pde1a         | chr2:79674609-79969569 | 0 | 0 |
| Gm13752       | chr2:80231520-80238373 | 0 | 0 |
| Frzb          | chr2:80252126-80287553 | 0 | 0 |
| Mir684-1      | chr2:80468861-80468947 | 0 | 0 |
| Zfp804a       | chr2:81893814-82100035 | 0 | 0 |
| Zswim2        | chr2:83755235-83781383 | 0 | 0 |
| Mir130a       | chr2:84581271-84581335 | 0 | 0 |
| Smtnl1        | chr2:84651332-84662809 | 0 | 0 |
| Prg2          | chr2:84820617-84823789 | 0 | 0 |
| Prg3          | chr2:84828371-84834043 | 0 | 0 |
| Olfr1008      | chr2:85529587-85530529 | 0 | 0 |
| Olfr1009      | chr2:85561563-85562508 | 0 | 0 |
| Olfr1010      | chr2:85593519-85594463 | 0 | 0 |
| Olfr1012      | chr2:85599595-85600531 | 0 | 0 |
| Olfr1015      | chr2:85625630-85626646 | 0 | 0 |
| Olfr1016      | chr2:85639495-85640425 | 0 | 0 |
| Olfr1018      | chr2:85663129-85664065 | 0 | 0 |
| Olfr1019      | chr2:85681013-85681946 | 0 | 0 |
| Olfr1020      | chr2:85689576-85690655 | 0 | 0 |
| Olfr1022      | chr2:85708750-85709698 | 0 | 0 |
| Olfr1023      | chr2:85726958-85727894 | 0 | 0 |
| Olfr1024      | chr2:85744225-85745209 | 0 | 0 |
| Olfr1026      | chr2:85763426-85764350 | 0 | 0 |
| Olfr1028      | chr2:85791221-85792196 | 0 | 0 |
| Olfr1029      | chr2:85815369-85816430 | 0 | 0 |
| Olfr1030      | chr2:85819468-85824955 | 0 | 0 |
| Olfr1031      | chr2:85831975-85832986 | 0 | 0 |
| Olfr1032      | chr2:85847934-85848867 | 0 | 0 |
| Olfr1033      | chr2:85860796-85884965 | 0 | 0 |
| Olfr1034      | chr2:85886600-85887623 | 0 | 0 |
| Olfr1036      | chr2:85914860-85915875 | 0 | 0 |
| Olfr1037      | chr2:85924886-85926011 | 0 | 0 |
| Olfr1038-ps   | chr2:85960380-85963194 | 0 | 0 |
| Olfr1040      | chr2:85985947-85986889 | 0 | 0 |
| Olfr1042      | chr2:85999501-86000598 | 0 | 0 |
| Olfr1043      | chr2:86002159-86003104 | 0 | 0 |
| Olfr1044      | chr2:86011027-86011972 | 0 | 0 |
| Olfr52        | chr2:86021306-86022266 | 0 | 0 |
| Olfr1045      | chr2:86037959-86038907 | 0 | 0 |
| Olfr1046      | chr2:86056914-86057865 | 0 | 0 |

|              |                        |   |   |
|--------------|------------------------|---|---|
| Olfr1047     | chr2:86068166-86069126 | 0 | 0 |
| Olfr1048     | chr2:86076027-86076990 | 0 | 0 |
| Olfr1049     | chr2:86094921-86095848 | 0 | 0 |
| Olfr1051     | chr2:86115715-86116642 | 0 | 0 |
| Olfr1052     | chr2:86137974-86138913 | 0 | 0 |
| Olfr1053     | chr2:86154499-86155442 | 0 | 0 |
| Olfr1054     | chr2:86172572-86173511 | 0 | 0 |
| Olfr1055     | chr2:86186982-86187921 | 0 | 0 |
| Olfr1056     | chr2:86195515-86196594 | 0 | 0 |
| Olfr1057     | chr2:86214619-86215567 | 0 | 0 |
| Olfr1058     | chr2:86225622-86226573 | 0 | 0 |
| Olfr1061     | chr2:86253265-86254207 | 0 | 0 |
| Olfr1062     | chr2:86262875-86263831 | 0 | 0 |
| Olfr1065     | chr2:86285169-86286161 | 0 | 0 |
| Olfr1066     | chr2:86295484-86296426 | 0 | 0 |
| Olfr228      | chr2:86322955-86323897 | 0 | 0 |
| Olfr1076     | chr2:86348617-86349559 | 0 | 0 |
| Olfr1077-ps1 | chr2:86365819-86368584 | 0 | 0 |
| Olfr1079     | chr2:86378122-86379070 | 0 | 0 |
| Olfr1080     | chr2:86393337-86398295 | 0 | 0 |
| Olfr1082     | chr2:86434041-86438966 | 0 | 0 |
| Olfr1084     | chr2:86478921-86479875 | 0 | 0 |
| Olfr1085     | chr2:86497671-86498613 | 0 | 0 |
| Olfr1086     | chr2:86516555-86517488 | 0 | 0 |
| Olfr1087     | chr2:86530188-86531130 | 0 | 0 |
| Olfr1089     | chr2:86572831-86573767 | 0 | 0 |
| Olfr1090     | chr2:86593951-86594893 | 0 | 0 |
| Olfr1093     | chr2:86625888-86626857 | 0 | 0 |
| Olfr141      | chr2:86646177-86647154 | 0 | 0 |
| Olfr1094     | chr2:86668832-86669979 | 0 | 0 |
| Olfr1095     | chr2:86690926-86691853 | 0 | 0 |
| Olfr1097     | chr2:86730382-86732320 | 0 | 0 |
| Olfr1098     | chr2:86762739-86763687 | 0 | 0 |
| Olfr1099     | chr2:86798674-86799613 | 0 | 0 |
| Olfr1100     | chr2:86817985-86818951 | 0 | 0 |
| Olfr1101     | chr2:86828398-86829331 | 0 | 0 |
| Olfr1102     | chr2:86842088-86843151 | 0 | 0 |
| Olfr1104     | chr2:86861766-86862699 | 0 | 0 |
| Olfr1105     | chr2:86873437-86874376 | 0 | 0 |
| Olfr1106     | chr2:86888452-86889391 | 0 | 0 |
| Olfr1107     | chr2:86911272-86912380 | 0 | 0 |
| Olfr1109     | chr2:86932613-86933552 | 0 | 0 |
| Olfr259      | chr2:86947603-86948542 | 0 | 0 |
| Olfr1110     | chr2:86975537-86976476 | 0 | 0 |
| Olfr1111     | chr2:86989876-86990816 | 0 | 0 |
| Olfr1112     | chr2:87031845-87032802 | 0 | 0 |
| Olfr1113     | chr2:87053050-87054031 | 0 | 0 |
| Olfr1115     | chr2:87091996-87093098 | 0 | 0 |
| Olfr1116-ps  | chr2:87109002-87109926 | 0 | 0 |
| Olfr1118     | chr2:87148920-87149916 | 0 | 0 |
| Olfr1120     | chr2:87197602-87198547 | 0 | 0 |
| Olfr1121     | chr2:87211690-87212635 | 0 | 0 |





|               |                          |   |   |
|---------------|--------------------------|---|---|
| Olfr1252      | chr2:89561321-89562266   | 0 | 0 |
| Olfr1253      | chr2:89592026-89592983   | 0 | 0 |
| Olfr1254      | chr2:89628562-89629507   | 0 | 0 |
| Olfr1255      | chr2:89656484-89657417   | 0 | 0 |
| Olfr1256      | chr2:89675179-89676100   | 0 | 0 |
| Olfr48        | chr2:89684222-89685128   | 0 | 0 |
| Olfr1257      | chr2:89720984-89721914   | 0 | 0 |
| Olfr1258      | chr2:89769967-89770903   | 0 | 0 |
| Olfr1259      | chr2:89783340-89784270   | 0 | 0 |
| Olfr1260      | chr2:89817936-89818869   | 0 | 0 |
| Olfr1261      | chr2:89833551-89834472   | 0 | 0 |
| Olfr1262      | chr2:89842564-89843479   | 0 | 0 |
| Olfr1263      | chr2:89855088-89856009   | 0 | 0 |
| Olfr1264      | chr2:89861294-89862221   | 0 | 0 |
| Olfr1265      | chr2:89877077-89878007   | 0 | 0 |
| Olfr140       | chr2:89891570-89892479   | 0 | 0 |
| Olfr1269      | chr2:89958823-89959753   | 0 | 0 |
| Olfr32        | chr2:89978336-89982450   | 0 | 0 |
| Olfr1270      | chr2:89989175-89990193   | 0 | 0 |
| Olfr1506      | chr2:90061723-90064628   | 0 | 0 |
| Olfr142       | chr2:90092225-90093143   | 0 | 0 |
| Olfr1271      | chr2:90105667-90106585   | 0 | 0 |
| Olfr1272      | chr2:90121803-90122730   | 0 | 0 |
| Olfr1273-ps   | chr2:90136092-90137016   | 0 | 0 |
| Olfr1506      | chr2:90162378-90165283   | 0 | 0 |
| Olfr1274-ps   | chr2:90240796-90241831   | 0 | 0 |
| Snord67       | chr2:91436237-91436335   | 0 | 0 |
| Mir1955       | chr2:92032133-92032231   | 0 | 0 |
| Syt13         | chr2:92755257-92796208   | 0 | 0 |
| Mir129-2      | chr2:94081520-94081610   | 0 | 0 |
| Mir670        | chr2:94101456-94101556   | 0 | 0 |
| Rag2          | chr2:101464904-101472685 | 0 | 0 |
| Rag1          | chr2:101478410-101489689 | 0 | 0 |
| 4930547E08Rik | chr2:103644608-103650779 | 0 | 0 |
| A930018P22Rik | chr2:103962925-103964903 | 0 | 0 |
| Mir1902       | chr2:104269017-104269097 | 0 | 0 |
| AI314831      | chr2:104916694-104966667 | 0 | 0 |
| Wt1           | chr2:104966685-105013771 | 0 | 0 |
| 0610012H03Rik | chr2:105064498-105220017 | 0 | 0 |
| Pax6os1       | chr2:105376236-105510487 | 0 | 0 |
| Gm14015       | chr2:106303979-106363260 | 0 | 0 |
| Fshb          | chr2:106896297-106899808 | 0 | 0 |
| Fibin         | chr2:110201081-110203150 | 0 | 0 |
| 4930430A15Rik | chr2:111033410-111069757 | 0 | 0 |
| Olfr1275      | chr2:111071009-111071948 | 0 | 0 |
| Olfr1276      | chr2:111097273-111098212 | 0 | 0 |
| Olfr1277      | chr2:111109610-111110522 | 0 | 0 |
| Olfr1278      | chr2:111132426-111133368 | 0 | 0 |
| Olfr1279      | chr2:111146357-111147299 | 0 | 0 |
| Olfr1280      | chr2:111155637-111156555 | 0 | 0 |
| Olfr1281      | chr2:111168577-111169495 | 0 | 0 |
| Olfr1282      | chr2:111175315-111176233 | 0 | 0 |

|               |                          |   |   |
|---------------|--------------------------|---|---|
| Olfr1283      | chr2:111208790-111209708 | 0 | 0 |
| Olfr1284      | chr2:111219158-111220094 | 0 | 0 |
| Olfr1286      | chr2:111260188-111261106 | 0 | 0 |
| Olfr1287      | chr2:111289298-111290216 | 0 | 0 |
| Olfr1288      | chr2:111318942-111319881 | 0 | 0 |
| Olfr1289      | chr2:111323588-111324485 | 0 | 0 |
| Olfr1290      | chr2:111329374-111330313 | 0 | 0 |
| Olfr1294      | chr2:111377505-111378444 | 0 | 0 |
| Olfr1295      | chr2:111404660-111405599 | 0 | 0 |
| Olfr1297      | chr2:111461290-111462229 | 0 | 0 |
| Olfr1298      | chr2:111485213-111486152 | 0 | 0 |
| Olfr1299      | chr2:111501609-111505323 | 0 | 0 |
| Olfr1300-ps1  | chr2:111507593-111533476 | 0 | 0 |
| Olfr1301      | chr2:111594407-111595346 | 0 | 0 |
| Olfr1302      | chr2:111620469-111621417 | 0 | 0 |
| Olfr1303      | chr2:111653942-111654881 | 0 | 0 |
| Olfr1305      | chr2:111713071-111714010 | 0 | 0 |
| Olfr1306      | chr2:111752146-111753085 | 0 | 0 |
| Olfr1307      | chr2:111784672-111785611 | 0 | 0 |
| Olfr1308      | chr2:111800265-111801228 | 0 | 0 |
| Olfr1309      | chr2:111823290-111824253 | 0 | 0 |
| Olfr1310      | chr2:111848402-111849341 | 0 | 0 |
| Olfr1311      | chr2:111861070-111862009 | 0 | 0 |
| Olfr1312      | chr2:111882233-111883187 | 0 | 0 |
| Olfr1313      | chr2:111911802-111912738 | 0 | 0 |
| Olfr1314      | chr2:111931917-111932856 | 0 | 0 |
| Olfr1316      | chr2:111970027-111970972 | 0 | 0 |
| Olfr1317      | chr2:111982103-111983054 | 0 | 0 |
| Chrm5         | chr2:112319228-112320974 | 0 | 0 |
| Tmco5b        | chr2:113125888-113137347 | 0 | 0 |
| Grem1         | chr2:113588831-113598805 | 0 | 0 |
| Gjd2          | chr2:113835336-113839355 | 0 | 0 |
| A530058N18Rik | chr2:113839300-113858028 | 0 | 0 |
| Actc1         | chr2:113873024-113878547 | 0 | 0 |
| C130080G10Rik | chr2:113880131-113887238 | 0 | 0 |
| 4930528P14Rik | chr2:115155001-115170016 | 0 | 0 |
| 3110099E03Rik | chr2:115319248-115337937 | 0 | 0 |
| Mir1951       | chr2:115464460-115464549 | 0 | 0 |
| 2810405F15Rik | chr2:115900283-115901832 | 0 | 0 |
| Tmco5         | chr2:116704426-116718236 | 0 | 0 |
| Mir674        | chr2:117010862-117010962 | 0 | 0 |
| 4930412B13Rik | chr2:117647663-117734872 | 0 | 0 |
| Gpr176        | chr2:118102833-118199155 | 0 | 0 |
| 1700054M17Rik | chr2:118130649-118133902 | 0 | 0 |
| Phgr1         | chr2:118598504-118603900 | 0 | 0 |
| Patl2         | chr2:121945843-122011925 | 0 | 0 |
| 4933406J08Rik | chr2:122012007-122032129 | 0 | 0 |
| Duoxa2        | chr2:122124635-122128621 | 0 | 0 |
| Slc28a2       | chr2:122252212-122286866 | 0 | 0 |
| Gm14085       | chr2:122310676-122353776 | 0 | 0 |
| Mir147        | chr2:122466538-122466617 | 0 | 0 |
| 4930517E11Rik | chr2:123949371-123955692 | 0 | 0 |

|               |                          |   |   |
|---------------|--------------------------|---|---|
| 4930583P06Rik | chr2:124043414-124048094 | 0 | 0 |
| Ctxn2         | chr2:124962427-124973577 | 0 | 0 |
| Astl          | chr2:127164374-127183387 | 0 | 0 |
| Adra2b        | chr2:127189021-127192957 | 0 | 0 |
| Gm14047       | chr2:129195637-129201469 | 0 | 0 |
| F830045P16Rik | chr2:129284094-129362338 | 0 | 0 |
| Tmc2          | chr2:130020929-130090181 | 0 | 0 |
| Snord110      | chr2:130101250-130101309 | 0 | 0 |
| Snord57       | chr2:130103761-130103824 | 0 | 0 |
| 1700020A23Rik | chr2:130230994-130231810 | 0 | 0 |
| 4933425O20Rik | chr2:130232257-130233530 | 0 | 0 |
| Oxt           | chr2:130401908-130402724 | 0 | 0 |
| Avp           | chr2:130406412-130408277 | 0 | 0 |
| Adam33        | chr2:130876552-130889550 | 0 | 0 |
| Siglec1       | chr2:130894955-130912501 | 0 | 0 |
| Mir103-2      | chr2:131113787-131113873 | 0 | 0 |
| Erv3          | chr2:131679413-131685483 | 0 | 0 |
| 4921508D12Rik | chr2:132250476-132278235 | 0 | 0 |
| 1700026D11Rik | chr2:132316463-132349793 | 0 | 0 |
| AU019990      | chr2:132423931-132478800 | 0 | 0 |
| Hao1          | chr2:134323096-134380088 | 0 | 0 |
| 9630028H03Rik | chr2:135406265-135408956 | 0 | 0 |
| 6330527O06Rik | chr2:135883662-135895653 | 0 | 0 |
| Pak7          | chr2:135906823-136213703 | 0 | 0 |
| Mir1952       | chr2:138645664-138645743 | 0 | 0 |
| Otor          | chr2:142904227-142907435 | 0 | 0 |
| 9430032N09Rik | chr2:143573318-143614922 | 0 | 0 |
| Banf2         | chr2:143858837-143899715 | 0 | 0 |
| Gm5535        | chr2:143998885-144015026 | 0 | 0 |
| 1700010M22Rik | chr2:144649401-144650151 | 0 | 0 |
| Gm14092       | chr2:145375190-145380718 | 0 | 0 |
| 4933406D12Rik | chr2:146368666-146371844 | 0 | 0 |
| Nkx2-4        | chr2:146909611-146911081 | 0 | 0 |
| Nkx2-2as      | chr2:147009818-147157417 | 0 | 0 |
| Cst11         | chr2:148576096-148581114 | 0 | 0 |
| Cst11         | chr2:148594353-148597233 | 0 | 0 |
| 8030411F24Rik | chr2:148607744-148611672 | 0 | 0 |
| Cst12         | chr2:148615096-148619173 | 0 | 0 |
| Cst8          | chr2:148624574-148631320 | 0 | 0 |
| Cst13         | chr2:148645834-148656146 | 0 | 0 |
| Cst9          | chr2:148660882-148664473 | 0 | 0 |
| 9230104L09Rik | chr2:148672449-148676670 | 0 | 0 |
| Cst10         | chr2:149230984-149236014 | 0 | 0 |
| Tmem90b       | chr2:149656518-149830128 | 0 | 0 |
| Gm14139       | chr2:150007490-150019015 | 0 | 0 |
| Vsx1          | chr2:150506439-150514873 | 0 | 0 |
| Gm14151       | chr2:150912521-150918086 | 0 | 0 |
| Gm14151       | chr2:150923980-150929545 | 0 | 0 |
| 4930442J19Rik | chr2:151127774-151141739 | 0 | 0 |
| 4921509C19Rik | chr2:151296277-151301887 | 0 | 0 |
| Rad21l        | chr2:151471139-151494269 | 0 | 0 |
| Rspo4         | chr2:151668662-151700404 | 0 | 0 |

|               |                          |   |   |
|---------------|--------------------------|---|---|
| Mir1953       | chr2:151793264-151793353 | 0 | 0 |
| Scrt2         | chr2:151907264-151921538 | 0 | 0 |
| Tcf15         | chr2:151969344-151974832 | 0 | 0 |
| Defb23        | chr2:152284790-152290356 | 0 | 0 |
| Defb20        | chr2:152302798-152305670 | 0 | 0 |
| Defb22        | chr2:152311401-152315874 | 0 | 0 |
| Defb26        | chr2:152333491-152337472 | 0 | 0 |
| Defb28        | chr2:152343990-152347183 | 0 | 0 |
| Defb29        | chr2:152364449-152365777 | 0 | 0 |
| Defb21        | chr2:152398479-152400679 | 0 | 0 |
| Defb19        | chr2:152401821-152406048 | 0 | 0 |
| Defb45        | chr2:152418926-152422221 | 0 | 0 |
| Defb36        | chr2:152430062-152438465 | 0 | 0 |
| Defb25        | chr2:152448091-152448789 | 0 | 0 |
| Rem1          | chr2:152452743-152460927 | 0 | 0 |
| Cox4i2        | chr2:152579908-152590773 | 0 | 0 |
| Mylk2         | chr2:152737087-152748801 | 0 | 0 |
| Foxs1         | chr2:152757633-152758944 | 0 | 0 |
| Dusp15        | chr2:152766730-152777318 | 0 | 0 |
| Xkr7          | chr2:152857587-152881511 | 0 | 0 |
| BC020535      | chr2:152891737-152907471 | 0 | 0 |
| Sun5          | chr2:153681925-153696820 | 0 | 0 |
| Bpifb2        | chr2:153700780-153721006 | 0 | 0 |
| Bpifb6        | chr2:153726123-153738529 | 0 | 0 |
| Bpifb3        | chr2:153743965-153758732 | 0 | 0 |
| Bpifb4        | chr2:153766597-153789588 | 0 | 0 |
| Bpifa6        | chr2:153800680-153826231 | 0 | 0 |
| Bpifa2        | chr2:153834011-153841809 | 0 | 0 |
| Bpifa3        | chr2:153956082-153964091 | 0 | 0 |
| a             | chr2:154839305-154876748 | 0 | 0 |
| 2310005A03Rik | chr2:154923526-154925815 | 0 | 0 |
| Mir499        | chr2:155448615-155448694 | 0 | 0 |
| Gdf5          | chr2:155766760-155771100 | 0 | 0 |
| Spag4         | chr2:155890948-155895235 | 0 | 0 |
| Gm14169       | chr2:156434933-156439158 | 0 | 0 |
| Gm1332        | chr2:156912790-156922217 | 0 | 0 |
| 1700060C20Rik | chr2:158017743-158021470 | 0 | 0 |
| Bpi           | chr2:158083976-158110267 | 0 | 0 |
| Gm14204       | chr2:158421207-158436459 | 0 | 0 |
| Slc32a1       | chr2:158436493-158441483 | 0 | 0 |
| Mir3474       | chr2:158464318-158464376 | 0 | 0 |
| 4933416E03Rik | chr2:159773076-159807025 | 0 | 0 |
| 9130015L21Rik | chr2:159842388-159866356 | 0 | 0 |
| C330008G21Rik | chr2:162216548-162219682 | 0 | 0 |
| 9430021M05Rik | chr2:162486898-162500940 | 0 | 0 |
| Gtsf1l        | chr2:162912766-162915337 | 0 | 0 |
| Tox2          | chr2:163051189-163148838 | 0 | 0 |
| 2310001K24Rik | chr2:163298280-163298739 | 0 | 0 |
| R3hdml        | chr2:163318053-163328348 | 0 | 0 |
| 0610008F07Rik | chr2:163319539-163367457 | 0 | 0 |
| Hnf4a         | chr2:163372923-163398643 | 0 | 0 |
| Wisp2         | chr2:163646569-163658883 | 0 | 0 |



|               |                          |   |   |
|---------------|--------------------------|---|---|
| Kcnk15        | chr2:163679485-163684610 | 0 | 0 |
| Rims4         | chr2:163689616-163744419 | 0 | 0 |
| Wfdc15a       | chr2:164024607-164025853 | 0 | 0 |
| Wfdc15b       | chr2:164040189-164047399 | 0 | 0 |
| Svs2          | chr2:164061664-164064077 | 0 | 0 |
| Svs3b         | chr2:164080098-164082379 | 0 | 0 |
| Svs4          | chr2:164101691-164104043 | 0 | 0 |
| Svs3a         | chr2:164115003-164117236 | 0 | 0 |
| Svs6          | chr2:164142486-164144186 | 0 | 0 |
| Svs5          | chr2:164158500-164160130 | 0 | 0 |
| Wfdc6a        | chr2:164405018-164410947 | 0 | 0 |
| Spinlw1       | chr2:164413842-164419071 | 0 | 0 |
| Wfdc6b        | chr2:164439199-164443713 | 0 | 0 |
| Wfdc16        | chr2:164460207-164464302 | 0 | 0 |
| Wfdc9         | chr2:164475124-164480466 | 0 | 0 |
| Wfdc10        | chr2:164481545-164482868 | 0 | 0 |
| Wfdc11        | chr2:164488393-164499587 | 0 | 0 |
| Spint4        | chr2:164524000-164527948 | 0 | 0 |
| Gm14316       | chr2:164540804-164543568 | 0 | 0 |
| Mmp9          | chr2:164773750-164781346 | 0 | 0 |
| Cd40          | chr2:164881135-164897154 | 0 | 0 |
| 1700025C18Rik | chr2:164904192-164916250 | 0 | 0 |
| Cdh22         | chr2:164937006-165060237 | 0 | 0 |
| Zfp663        | chr2:165176796-165187619 | 0 | 0 |
| Slc13a3       | chr2:165230794-165298697 | 0 | 0 |
| Gm11468       | chr2:166099407-166120331 | 0 | 0 |
| 5031425F14Rik | chr2:166272950-166284270 | 0 | 0 |
| Snord12       | chr2:166890792-166890858 | 0 | 0 |
| Ptgis         | chr2:167028695-167066037 | 0 | 0 |
| E130018N17Rik | chr2:167978102-167980013 | 0 | 0 |
| Kcng1         | chr2:168087197-168094831 | 0 | 0 |
| Cyp24a1       | chr2:170308464-170322638 | 0 | 0 |
| Gm16796       | chr2:170324856-170337427 | 0 | 0 |
| 4930470P17Rik | chr2:170404917-170427517 | 0 | 0 |
| Dok5          | chr2:170557306-170705275 | 0 | 0 |
| 1700028P15Rik | chr2:171782378-171788299 | 0 | 0 |
| Mc3r          | chr2:172073991-172076614 | 0 | 0 |
| 1300015D01Rik | chr2:172950249-172958705 | 0 | 0 |
| Pck1          | chr2:172978573-172984754 | 0 | 0 |
| 1700021F07Rik | chr2:173348092-173354003 | 0 | 0 |
| Mir296        | chr2:174092547-174092626 | 0 | 0 |
| Mir298        | chr2:174093004-174093086 | 0 | 0 |
| Nespas        | chr2:174106737-174120937 | 0 | 0 |
| Edn3          | chr2:174586273-174609543 | 0 | 0 |
| 4930591A17Rik | chr2:179149640-179151585 | 0 | 0 |
| Mir3091       | chr2:179992240-179992316 | 0 | 0 |
| Gata5         | chr2:180059792-180069384 | 0 | 0 |
| Gm14318       | chr2:180067561-180075437 | 0 | 0 |
| B230312C02Rik | chr2:180105562-180120590 | 0 | 0 |
| Gm6307        | chr2:180120308-180136507 | 0 | 0 |
| Mir1a-1       | chr2:180123752-180123829 | 0 | 0 |
| Mir133a-2     | chr2:180133083-180133187 | 0 | 0 |

|               |                          |   |   |
|---------------|--------------------------|---|---|
| Ntsr1         | chr2:180234680-180279684 | 0 | 0 |
| Bhlhe23       | chr2:180509085-180511605 | 0 | 0 |
| Mir124a-3     | chr2:180628744-180628812 | 0 | 0 |
| Birc7         | chr2:180663727-180668715 | 0 | 0 |
| Nkain4        | chr2:180669476-180689404 | 0 | 0 |
| Chrna4        | chr2:180757015-180773882 | 0 | 0 |
| Eef1a2        | chr2:180882396-180891720 | 0 | 0 |
| Abhd16b       | chr2:181227910-181229685 | 0 | 0 |
| 4930526D03Rik | chr2:181431499-181433147 | 0 | 0 |
| Opr1          | chr2:181449720-181455690 | 0 | 0 |
| 1700008P02Rik | chr3:6615412-6620443     | 0 | 0 |
| 1700010I02Rik | chr3:7925302-7954887     | 0 | 0 |
| Stmn2         | chr3:8509526-8561604     | 0 | 0 |
| 4930539M17Rik | chr3:9061963-9071076     | 0 | 0 |
| Pmp2          | chr3:10179850-10183885   | 0 | 0 |
| Fabp9         | chr3:10193623-10197222   | 0 | 0 |
| Fabp4         | chr3:10204342-10208576   | 0 | 0 |
| Fabp12        | chr3:10244208-10301183   | 0 | 0 |
| Gm10745       | chr3:11823228-11844359   | 0 | 0 |
| 4930539N22Rik | chr3:13597138-13652865   | 0 | 0 |
| Slc7a12       | chr3:14480698-14505818   | 0 | 0 |
| Car1          | chr3:14766213-14808365   | 0 | 0 |
| Car3          | chr3:14863537-14872373   | 0 | 0 |
| A930001A20Rik | chr3:14971200-15002727   | 0 | 0 |
| Gm9733        | chr3:15296550-15332302   | 0 | 0 |
| Sirpb1a       | chr3:15371826-15426427   | 0 | 0 |
| Sirpb1b       | chr3:15495753-15575065   | 0 | 0 |
| LOC100038947  | chr3:15695146-15748487   | 0 | 0 |
| Gm5150        | chr3:15848069-15906332   | 0 | 0 |
| 2610100L16Rik | chr3:17689920-17700071   | 0 | 0 |
| Mir124a-2     | chr3:17695661-17695770   | 0 | 0 |
| Cypt12        | chr3:17848443-17848952   | 0 | 0 |
| 4930433B08Rik | chr3:18368284-18380477   | 0 | 0 |
| Dnajc5b       | chr3:19408594-19510862   | 0 | 0 |
| Trim55        | chr3:19544459-19591599   | 0 | 0 |
| Crh           | chr3:19593400-19595396   | 0 | 0 |
| Cpa3          | chr3:20115514-20142080   | 0 | 0 |
| Cpb1          | chr3:20149382-20174651   | 0 | 0 |
| Agtr1b        | chr3:20213394-20266099   | 0 | 0 |
| Rpr12         | chr3:22150291-22150529   | 0 | 0 |
| Spata16       | chr3:26536552-26882134   | 0 | 0 |
| 1700125G22Rik | chr3:27052947-27055941   | 0 | 0 |
| Mir3092       | chr3:27483821-27483917   | 0 | 0 |
| Slc2a2        | chr3:28596824-28627282   | 0 | 0 |
| Gm1527        | chr3:28791538-28825646   | 0 | 0 |
| Egfem1        | chr3:28981498-29589978   | 0 | 0 |
| Mir551b       | chr3:29315744-29315842   | 0 | 0 |
| Mecom         | chr3:30135490-30408409   | 0 | 0 |
| Arpm1         | chr3:30495994-30498792   | 0 | 0 |
| Lrriq4        | chr3:30543428-30571353   | 0 | 0 |
| Samd7         | chr3:30645214-30666096   | 0 | 0 |
| Mir1897       | chr3:34537385-34537464   | 0 | 0 |

|               |                        |   |   |
|---------------|------------------------|---|---|
| Gm3143        | chr3:34598561-34615584 | 0 | 0 |
| Gm6639        | chr3:35496073-35565085 | 0 | 0 |
| Qrfpr         | chr3:36078347-36121197 | 0 | 0 |
| E330009D11    | chr3:36398725-36405731 | 0 | 0 |
| Trpc3         | chr3:36519403-36589089 | 0 | 0 |
| Adad1         | chr3:36962577-37010434 | 0 | 0 |
| Il2           | chr3:37019641-37024876 | 0 | 0 |
| Il21          | chr3:37121680-37131540 | 0 | 0 |
| Fgf2          | chr3:37247574-37303752 | 0 | 0 |
| LOC626410     | chr3:37797734-37891650 | 0 | 0 |
| 5430434I15Rik | chr3:38102072-38107041 | 0 | 0 |
| 1700017G19Rik | chr3:40403786-40421834 | 0 | 0 |
| C430002E04Rik | chr3:41291602-41297121 | 0 | 0 |
| 2610316D01Rik | chr3:45084360-45182182 | 0 | 0 |
| Pcdh10        | chr3:45182319-45238501 | 0 | 0 |
| 1700027H10Rik | chr3:45220505-45243231 | 0 | 0 |
| Pabpc4l       | chr3:46246118-46251863 | 0 | 0 |
| 1700018B24Rik | chr3:48409652-48413022 | 0 | 0 |
| LOC622124     | chr3:52710677-52731588 | 0 | 0 |
| 4931419H13Rik | chr3:54859163-54887924 | 0 | 0 |
| Sohlh2        | chr3:54985965-55013879 | 0 | 0 |
| Tm4sf4        | chr3:57229331-57245597 | 0 | 0 |
| 1700007F19Rik | chr3:57945628-57967729 | 0 | 0 |
| 4930593A02Rik | chr3:58496510-58592446 | 0 | 0 |
| Gm5538        | chr3:59533707-59556319 | 0 | 0 |
| Gm8298        | chr3:59664972-59681235 | 0 | 0 |
| Gpr149        | chr3:62333884-62409062 | 0 | 0 |
| Vmn2r2        | chr3:63920353-63941402 | 0 | 0 |
| Vmn2r3        | chr3:64062882-64091339 | 0 | 0 |
| Vmn2r4        | chr3:64192542-64213979 | 0 | 0 |
| Vmn2r6        | chr3:64341482-64363740 | 0 | 0 |
| Vmn2r7        | chr3:64494581-64523524 | 0 | 0 |
| Veph1         | chr3:65858747-66100741 | 0 | 0 |
| Ptx3          | chr3:66023808-66029728 | 0 | 0 |
| Shox2         | chr3:66777190-66785693 | 0 | 0 |
| lqcj          | chr3:67696141-67860515 | 0 | 0 |
| Il12a         | chr3:68494565-68502469 | 0 | 0 |
| Mir15b        | chr3:68813693-68813757 | 0 | 0 |
| Mir16-2       | chr3:68813823-68813918 | 0 | 0 |
| Gm1647        | chr3:68935154-68961099 | 0 | 0 |
| Otol1         | chr3:69811534-69832630 | 0 | 0 |
| Gm6634        | chr3:70576300-70611213 | 0 | 0 |
| Slitrk3       | chr3:72852046-72860865 | 0 | 0 |
| LOC626082     | chr3:72870272-73398752 | 0 | 0 |
| 4930509J09Rik | chr3:73155127-73285573 | 0 | 0 |
| Gm20356       | chr3:73813140-73821199 | 0 | 0 |
| Serpini2      | chr3:75046292-75074000 | 0 | 0 |
| Fstl5         | chr3:75878482-76513927 | 0 | 0 |
| Rxfp1         | chr3:79448637-79541716 | 0 | 0 |
| Accn5         | chr3:81800843-81825155 | 0 | 0 |
| Gucy1a3       | chr3:81896348-81949799 | 0 | 0 |
| Npy2r         | chr3:82342304-82352007 | 0 | 0 |

|               |                        |   |   |
|---------------|------------------------|---|---|
| Rbm46         | chr3:82641154-82680405 | 0 | 0 |
| 4930564K09Rik | chr3:82680626-82747560 | 0 | 0 |
| Fgg           | chr3:82811817-82818971 | 0 | 0 |
| Fga           | chr3:82830074-82837539 | 0 | 0 |
| Fgb           | chr3:82846226-82853712 | 0 | 0 |
| 1700028M03Rik | chr3:83359288-83378040 | 0 | 0 |
| Snord73a      | chr3:85942712-85942780 | 0 | 0 |
| Rnu73b        | chr3:85944538-85944609 | 0 | 0 |
| Fcrls         | chr3:87054886-87067446 | 0 | 0 |
| Cd5l          | chr3:87161802-87174996 | 0 | 0 |
| Fcrl1         | chr3:87180308-87196055 | 0 | 0 |
| Fcrl5         | chr3:87239703-87304600 | 0 | 0 |
| Ntrk1         | chr3:87582165-87599084 | 0 | 0 |
| Bcan          | chr3:87791452-87804278 | 0 | 0 |
| Hapl2         | chr3:87825671-87831433 | 0 | 0 |
| Mir3093       | chr3:88019092-88019179 | 0 | 0 |
| Mir9-1        | chr3:88019519-88019608 | 0 | 0 |
| Mir1905       | chr3:88340222-88340304 | 0 | 0 |
| Mir720        | chr3:88920530-88920594 | 0 | 0 |
| Mir92b        | chr3:89031037-89031120 | 0 | 0 |
| She           | chr3:89635291-89662768 | 0 | 0 |
| Mir190b       | chr3:89873941-89874021 | 0 | 0 |
| S100a2        | chr3:90394168-90395430 | 0 | 0 |
| S100a5        | chr3:90412443-90415702 | 0 | 0 |
| S100a8        | chr3:90472992-90473956 | 0 | 0 |
| 9130204L05Rik | chr3:90892058-90894727 | 0 | 0 |
| Lelp1         | chr3:91938915-91946676 | 0 | 0 |
| Sprr2b        | chr3:92120626-92122007 | 0 | 0 |
| Sprr2d        | chr3:92143061-92144795 | 0 | 0 |
| Sprr2e        | chr3:92156064-92157371 | 0 | 0 |
| Sprr2f        | chr3:92169108-92170364 | 0 | 0 |
| Sprr2g        | chr3:92177836-92179151 | 0 | 0 |
| Sprr4         | chr3:92304184-92304415 | 0 | 0 |
| Lce6a         | chr3:92424006-92425582 | 0 | 0 |
| Lce1a1        | chr3:92450453-92452229 | 0 | 0 |
| Lce1b         | chr3:92459571-92460848 | 0 | 0 |
| Lce1a2        | chr3:92472534-92474237 | 0 | 0 |
| Lce1d         | chr3:92489420-92491132 | 0 | 0 |
| Lce1e         | chr3:92511321-92512996 | 0 | 0 |
| Lce1g         | chr3:92554072-92556260 | 0 | 0 |
| Lce1h         | chr3:92567136-92568987 | 0 | 0 |
| Lce1i         | chr3:92581131-92582821 | 0 | 0 |
| Lce1k         | chr3:92610212-92611813 | 0 | 0 |
| Lce1l         | chr3:92653870-92655208 | 0 | 0 |
| 2310050C09Rik | chr3:92672280-92674127 | 0 | 0 |
| Lce1m         | chr3:92821728-92822982 | 0 | 0 |
| Gm4858        | chr3:92872744-92879427 | 0 | 0 |
| Flg2          | chr3:93001194-93025298 | 0 | 0 |
| Tchhl1        | chr3:93272675-93275902 | 0 | 0 |
| Tdpoz2        | chr3:93455492-93456585 | 0 | 0 |
| Tdpoz1        | chr3:93473254-93480205 | 0 | 0 |
| Tdpoz4        | chr3:93600319-93601432 | 0 | 0 |

|               |                          |   |   |
|---------------|--------------------------|---|---|
| Tdpoz3        | chr3:93629941-93631039   | 0 | 0 |
| Gm9125        | chr3:93740554-93747465   | 0 | 0 |
| Gm10697       | chr3:93764213-93765236   | 0 | 0 |
| Gm9125        | chr3:93851902-93858807   | 0 | 0 |
| Tdpoz5        | chr3:93875543-93876566   | 0 | 0 |
| Gm10696       | chr3:93978333-93982115   | 0 | 0 |
| 4930558C23Rik | chr3:95190379-95206763   | 0 | 0 |
| Hormad1       | chr3:95363598-95391593   | 0 | 0 |
| BC107364      | chr3:96237710-96256229   | 0 | 0 |
| Hfe2          | chr3:96329107-96333139   | 0 | 0 |
| Ankrd34a      | chr3:96400558-96403701   | 0 | 0 |
| 4930442L01Rik | chr3:96633748-96635993   | 0 | 0 |
| Gja8          | chr3:96722944-96729853   | 0 | 0 |
| Gja5          | chr3:96836338-96857557   | 0 | 0 |
| Olfr1402      | chr3:97214139-97215102   | 0 | 0 |
| Adam30        | chr3:97964734-97967096   | 0 | 0 |
| Reg4          | chr3:98026078-98040671   | 0 | 0 |
| Hsd3b2        | chr3:98515029-98528466   | 0 | 0 |
| Tbx15         | chr3:99057682-99158183   | 0 | 0 |
| 4930406D18Rik | chr3:100230327-100241677 | 0 | 0 |
| Cd2           | chr3:101079830-101091862 | 0 | 0 |
| Nhlh2         | chr3:101814067-101819415 | 0 | 0 |
| 2410057H14Rik | chr3:102524153-102539340 | 0 | 0 |
| Nr1h5         | chr3:102743580-102768056 | 0 | 0 |
| Syt6          | chr3:103379203-103439102 | 0 | 0 |
| 4930564D02Rik | chr3:104869761-104881724 | 0 | 0 |
| 1700095B22Rik | chr3:105251107-105255873 | 0 | 0 |
| Adora3        | chr3:105673775-105726960 | 0 | 0 |
| I830077J02Rik | chr3:105728808-105735582 | 0 | 0 |
| Chi3l3        | chr3:105950471-105970482 | 0 | 0 |
| Olfr266       | chr3:106624524-106625475 | 0 | 0 |
| Kcna3         | chr3:106839079-106841047 | 0 | 0 |
| AI504432      | chr3:106842421-106857240 | 0 | 0 |
| Kcna10        | chr3:106986060-106998639 | 0 | 0 |
| Alx3          | chr3:107397948-107408687 | 0 | 0 |
| Scarna2       | chr3:108357259-108357320 | 0 | 0 |
| 4930443G12Rik | chr3:108883416-108919500 | 0 | 0 |
| Ntng1         | chr3:109582967-109946390 | 0 | 0 |
| Gm6602        | chr3:111684820-111884919 | 0 | 0 |
| Amy2b         | chr3:112950573-112959645 | 0 | 0 |
| Amy2a5        | chr3:113052095-113061617 | 0 | 0 |
| Amy2a2        | chr3:113082754-113094367 | 0 | 0 |
| Amy2a5        | chr3:113084762-113094229 | 0 | 0 |
| Amy2a2        | chr3:113115366-113126970 | 0 | 0 |
| Amy2a5        | chr3:113117374-113126832 | 0 | 0 |
| Amy2a2        | chr3:113147966-113159576 | 0 | 0 |
| Amy2a5        | chr3:113149974-113159438 | 0 | 0 |
| Col11a1       | chr3:113733457-113923244 | 0 | 0 |
| Vcam1         | chr3:115812937-115832606 | 0 | 0 |
| Gpr88         | chr3:115952571-115956402 | 0 | 0 |
| 1700061I17Rik | chr3:116763439-116780683 | 0 | 0 |
| 4833424O15Rik | chr3:117278378-117392424 | 0 | 0 |

|               |                          |   |   |
|---------------|--------------------------|---|---|
| Mir137        | chr3:118136774-118136847 | 0 | 0 |
| A730020M07Rik | chr3:121337855-121349371 | 0 | 0 |
| 4930432M17Rik | chr3:121373680-121385900 | 0 | 0 |
| Mir760        | chr3:121996502-121996621 | 0 | 0 |
| Myoz2         | chr3:122709123-122737905 | 0 | 0 |
| 1700006A11Rik | chr3:124104072-124128946 | 0 | 0 |
| 1700003H04Rik | chr3:124268808-124284009 | 0 | 0 |
| Ndst4         | chr3:125107008-125427904 | 0 | 0 |
| Mir302b       | chr3:127248145-127248219 | 0 | 0 |
| Mir302c       | chr3:127248280-127248348 | 0 | 0 |
| Mir302a       | chr3:127248413-127248482 | 0 | 0 |
| Mir302d       | chr3:127248541-127248607 | 0 | 0 |
| Mir367        | chr3:127248650-127248725 | 0 | 0 |
| Neurog2       | chr3:127336062-127338549 | 0 | 0 |
| 9830132P13    | chr3:127619088-127658138 | 0 | 0 |
| D030025E07Rik | chr3:127819932-127934523 | 0 | 0 |
| Gm5712        | chr3:129136590-129137630 | 0 | 0 |
| 6330410L21Rik | chr3:129456675-129466800 | 0 | 0 |
| Lrit3         | chr3:129491208-129506948 | 0 | 0 |
| Mir1895       | chr3:133903468-133903547 | 0 | 0 |
| 4930539C22Rik | chr3:134067106-134086599 | 0 | 0 |
| Bdh2          | chr3:134944184-134967389 | 0 | 0 |
| Bank1         | chr3:135716327-135989010 | 0 | 0 |
| Emcn          | chr3:137004041-137094033 | 0 | 0 |
| 4930579F01Rik | chr3:137827098-137849677 | 0 | 0 |
| Adh6-ps1      | chr3:138037084-138051255 | 0 | 0 |
| Adh4          | chr3:138078460-138093856 | 0 | 0 |
| Mir1956       | chr3:138189384-138189449 | 0 | 0 |
| 4930425O10Rik | chr3:138374498-138389948 | 0 | 0 |
| Pdha2         | chr3:140872967-140875319 | 0 | 0 |
| Gbp1          | chr3:142257810-142282140 | 0 | 0 |
| Gm6260        | chr3:143333855-143375107 | 0 | 0 |
| Gm6289        | chr3:144542288-144558975 | 0 | 0 |
| AI747448      | chr3:144573884-144595493 | 0 | 0 |
| Clca3         | chr3:144667500-144695740 | 0 | 0 |
| Col24a1       | chr3:144955435-145214969 | 0 | 0 |
| Gm10636       | chr3:146030116-146041908 | 0 | 0 |
| Dnase2b       | chr3:146244336-146278562 | 0 | 0 |
| 4930503B20Rik | chr3:146309222-146314281 | 0 | 0 |
| Ptgfr         | chr3:151461573-151500492 | 0 | 0 |
| AI115009      | chr3:152329876-152344396 | 0 | 0 |
| St6galnac5    | chr3:152483673-152645171 | 0 | 0 |
| 5730460C07Rik | chr3:153452268-153455051 | 0 | 0 |
| Asb17         | chr3:153507210-153516579 | 0 | 0 |
| 2510003D18Rik | chr3:153513337-153515388 | 0 | 0 |
| Snord45c      | chr3:153575092-153575153 | 0 | 0 |
| Snord45b      | chr3:153573530-153573575 | 0 | 0 |
| Lhx8          | chr3:153969257-153993524 | 0 | 0 |
| AI606473      | chr3:153993784-153997651 | 0 | 0 |
| Tnni3k        | chr3:154449254-154718371 | 0 | 0 |
| 4930570G19Rik | chr3:156209716-156224710 | 0 | 0 |
| Negr1         | chr3:156224757-156979411 | 0 | 0 |

|               |                          |   |   |
|---------------|--------------------------|---|---|
| Mir186        | chr3:157207242-157207313 | 0 | 0 |
| Rpe65         | chr3:159262144-159288271 | 0 | 0 |
| Vmn1r2        | chr4:3099229-3100150     | 0 | 0 |
| Mos           | chr4:3797804-3799252     | 0 | 0 |
| Penk          | chr4:4060682-4065592     | 0 | 0 |
| 4930423M02Rik | chr4:5559474-5569431     | 0 | 0 |
| Cyp7a1        | chr4:6192758-6202778     | 0 | 0 |
| 8430436N08Rik | chr4:7487834-7500948     | 0 | 0 |
| Gdf6          | chr4:9771518-9789492     | 0 | 0 |
| 4930448K20Rik | chr4:9843111-9844544     | 0 | 0 |
| 1700123O12Rik | chr4:10435177-10724949   | 0 | 0 |
| Mir684-2      | chr4:11061243-11061329   | 0 | 0 |
| Slc26a7       | chr4:14432343-14548925   | 0 | 0 |
| Lrrc69        | chr4:14592900-14723199   | 0 | 0 |
| Gm11837       | chr4:14857787-14880177   | 0 | 0 |
| Necab1        | chr4:14879391-15076278   | 0 | 0 |
| Mmp16         | chr4:17780628-18045881   | 0 | 0 |
| Slc7a13       | chr4:19745873-19769360   | 0 | 0 |
| Atp6v0d2      | chr4:19803984-19849713   | 0 | 0 |
| 4930480G23Rik | chr4:19906591-19932886   | 0 | 0 |
| Prdm13        | chr4:21604626-21613110   | 0 | 0 |
| 4930548K13Rik | chr4:26562966-26632596   | 0 | 0 |
| 4930556G01Rik | chr4:30591745-30782894   | 0 | 0 |
| Gja10         | chr4:32687839-32689357   | 0 | 0 |
| Cnr1          | chr4:34011606-34035806   | 0 | 0 |
| Spaca1        | chr4:34115288-34137042   | 0 | 0 |
| Gm136         | chr4:34691036-34703508   | 0 | 0 |
| Cga           | chr4:34841027-34854623   | 0 | 0 |
| 2410114N07Rik | chr4:34857037-34858730   | 0 | 0 |
| Lingo2        | chr4:35653896-36898777   | 0 | 0 |
| Mir876        | chr4:36592405-36592486   | 0 | 0 |
| Mir873        | chr4:36615542-36615619   | 0 | 0 |
| 1700009N14Rik | chr4:39397325-39398811   | 0 | 0 |
| 4930509K18Rik | chr4:40260264-40264752   | 0 | 0 |
| Tmem215       | chr4:40419212-40422686   | 0 | 0 |
| 4933428C19Rik | chr4:40429872-40472581   | 0 | 0 |
| Mir207        | chr4:40669949-40670028   | 0 | 0 |
| Mir5123       | chr4:40797088-40797171   | 0 | 0 |
| Mir3094       | chr4:40940727-40940791   | 0 | 0 |
| Gm3893        | chr4:41763293-42104673   | 0 | 0 |
| Gm13304       | chr4:41774206-41775337   | 0 | 0 |
| Ccl21b        | chr4:41774242-41775337   | 0 | 0 |
| Gm13298       | chr4:41836783-41842582   | 0 | 0 |
| Gm10591       | chr4:41985509-41986640   | 0 | 0 |
| Ccl21b        | chr4:41985545-41986640   | 0 | 0 |
| Gm1987        | chr4:42231042-42232176   | 0 | 0 |
| Ccl21a        | chr4:42231044-42232176   | 0 | 0 |
| Ccl19         | chr4:42248503-42250497   | 0 | 0 |
| Ccl21b        | chr4:42391949-42393044   | 0 | 0 |
| Ccl21c        | chr4:42391949-42393080   | 0 | 0 |
| Gm13298       | chr4:42535970-42541769   | 0 | 0 |
| Ccl21c        | chr4:42625654-42626785   | 0 | 0 |

|               |                        |   |   |
|---------------|------------------------|---|---|
| Ccl21b        | chr4:42625690-42626785 | 0 | 0 |
| Ccl19         | chr4:42768056-42770050 | 0 | 0 |
| Ccl21a        | chr4:42786391-42787523 | 0 | 0 |
| Gm1987        | chr4:42786391-42787525 | 0 | 0 |
| BC049635      | chr4:42880874-42887075 | 0 | 0 |
| Sit1          | chr4:43494954-43496581 | 0 | 0 |
| Olfr70        | chr4:43707871-43713679 | 0 | 0 |
| 5430416O09Rik | chr4:43742905-43747406 | 0 | 0 |
| A630077J23Rik | chr4:43764730-43772336 | 0 | 0 |
| Olfr159       | chr4:43782921-43783881 | 0 | 0 |
| Olfr29-ps1    | chr4:43794236-43795199 | 0 | 0 |
| Olfr155       | chr4:43867163-43868335 | 0 | 0 |
| Mir5106       | chr4:44234066-44234139 | 0 | 0 |
| 2900093L17Rik | chr4:45247594-45256862 | 0 | 0 |
| Gm829         | chr4:45696460-45736578 | 0 | 0 |
| Baat          | chr4:49502289-49519430 | 0 | 0 |
| Grin3a        | chr4:49678097-49857953 | 0 | 0 |
| Ppp3r2        | chr4:49691618-49694855 | 0 | 0 |
| Cylc2         | chr4:51229549-51242800 | 0 | 0 |
| C630028M04Rik | chr4:51980965-52063982 | 0 | 0 |
| 2700081L22Rik | chr4:52443155-52451836 | 0 | 0 |
| 4930552N02Rik | chr4:52827475-52841141 | 0 | 0 |
| Olfr275       | chr4:52838270-52839230 | 0 | 0 |
| Olfr273       | chr4:52868429-52869383 | 0 | 0 |
| Olfr272       | chr4:52923704-52924664 | 0 | 0 |
| Olfr270       | chr4:52983500-52984439 | 0 | 0 |
| Nipsnap3a     | chr4:53002155-53013726 | 0 | 0 |
| 4930522O17Rik | chr4:53259067-53263992 | 0 | 0 |
| Gm12505       | chr4:55423314-55431714 | 0 | 0 |
| Actl7b        | chr4:56752876-56754297 | 0 | 0 |
| Mir32         | chr4:56908100-56908170 | 0 | 0 |
| Gm12530       | chr4:57184942-57189426 | 0 | 0 |
| 1700042G15Rik | chr4:57372663-57377164 | 0 | 0 |
| Txndc8        | chr4:57996900-58021996 | 0 | 0 |
| Musk          | chr4:58298833-58387175 | 0 | 0 |
| Mir3095       | chr4:58453883-58453970 | 0 | 0 |
| Mup4          | chr4:59969677-59973537 | 0 | 0 |
| Mup6          | chr4:60016420-60019086 | 0 | 0 |
| Mup7          | chr4:60079340-60083347 | 0 | 0 |
| Mup15         | chr4:60079340-60152730 | 0 | 0 |
| Mup2          | chr4:60148804-60152729 | 0 | 0 |
| Mup8          | chr4:60231492-60235471 | 0 | 0 |
| Mup9          | chr4:60432031-60434824 | 0 | 0 |
| Mup1          | chr4:60510884-60514832 | 0 | 0 |
| Mup10         | chr4:60591132-60595027 | 0 | 0 |
| Gm2083        | chr4:60591132-60675237 | 0 | 0 |
| Mup2          | chr4:60591132-60675243 | 0 | 0 |
| Mup11         | chr4:60671338-60675267 | 0 | 0 |
| Mup12         | chr4:60732253-60736153 | 0 | 0 |
| Mup13         | chr4:60885338-60889318 | 0 | 0 |
| Mup14         | chr4:60961068-60965030 | 0 | 0 |
| Mup2          | chr4:60961070-61100735 | 0 | 0 |



|               |                        |   |   |
|---------------|------------------------|---|---|
| Mup15         | chr4:61096818-61100736 | 0 | 0 |
| Mup16         | chr4:61176624-61180518 | 0 | 0 |
| Mup17         | chr4:61252962-61256864 | 0 | 0 |
| LOC100048884  | chr4:61331211-61335128 | 0 | 0 |
| Mup19         | chr4:61439361-61443258 | 0 | 0 |
| Mup5          | chr4:61492352-61496214 | 0 | 0 |
| Mup20         | chr4:61711268-61715151 | 0 | 0 |
| Mup3          | chr4:61744510-61748346 | 0 | 0 |
| Mup21         | chr4:61808865-61811875 | 0 | 0 |
| Ambp          | chr4:62804312-62815176 | 0 | 0 |
| Mir455        | chr4:62917884-62917966 | 0 | 0 |
| Gm11213       | chr4:63257934-63266295 | 0 | 0 |
| Tnfsf8        | chr4:63493857-63522318 | 0 | 0 |
| Gm11487       | chr4:73062065-73066106 | 0 | 0 |
| LOC100502924  | chr4:73281698-73288074 | 0 | 0 |
| LOC100502924  | chr4:73296797-73303176 | 0 | 0 |
| LOC100502924  | chr4:73311921-73318299 | 0 | 0 |
| Gm428         | chr4:73329417-73333463 | 0 | 0 |
| Gm13871       | chr4:73518122-73522170 | 0 | 0 |
| Gm11757       | chr4:73518123-73522170 | 0 | 0 |
| Gm11758       | chr4:73518127-73522170 | 0 | 0 |
| Gm13871       | chr4:73532968-73537016 | 0 | 0 |
| Gm11757       | chr4:73532969-73537016 | 0 | 0 |
| Gm11758       | chr4:73532973-73537016 | 0 | 0 |
| Gm13871       | chr4:73547809-73551857 | 0 | 0 |
| Gm11757       | chr4:73547810-73551857 | 0 | 0 |
| Gm11758       | chr4:73547814-73551857 | 0 | 0 |
| Gm11756       | chr4:73562631-73566664 | 0 | 0 |
| 2310002L09Rik | chr4:73585274-73596750 | 0 | 0 |
| Frmf3         | chr4:73659506-73848118 | 0 | 0 |
| Cer1          | chr4:82527654-82531055 | 0 | 0 |
| Gm11413       | chr4:83024220-83036572 | 0 | 0 |
| Fam154a       | chr4:86090601-86204207 | 0 | 0 |
| Mir491        | chr4:87767943-87768029 | 0 | 0 |
| Gm12597       | chr4:88203576-88204149 | 0 | 0 |
| lfna14        | chr4:88217132-88217702 | 0 | 0 |
| lfna9         | chr4:88237716-88238289 | 0 | 0 |
| lfna12        | chr4:88248483-88249280 | 0 | 0 |
| C87499        | chr4:88273223-88280090 | 0 | 0 |
| lfna13        | chr4:88289544-88290363 | 0 | 0 |
| Gm13280       | chr4:88322190-88322760 | 0 | 0 |
| lfna2         | chr4:88329110-88329683 | 0 | 0 |
| lfnaB         | chr4:88336502-88337172 | 0 | 0 |
| lfna7         | chr4:88462128-88462704 | 0 | 0 |
| lfna11        | chr4:88465822-88466469 | 0 | 0 |
| lfna6         | chr4:88473319-88473889 | 0 | 0 |
| lfna5         | chr4:88481428-88481998 | 0 | 0 |
| lfna4         | chr4:88487719-88488363 | 0 | 0 |
| lfna1         | chr4:88495990-88496560 | 0 | 0 |
| lfne          | chr4:88525441-88526105 | 0 | 0 |
| Mir31         | chr4:88556460-88556566 | 0 | 0 |
| Cdkn2a        | chr4:88920376-88940523 | 0 | 0 |

|               |                          |   |   |
|---------------|--------------------------|---|---|
| Zfp352        | chr4:89885510-89892378   | 0 | 0 |
| Gm12633       | chr4:90026315-90028005   | 0 | 0 |
| Izumo3        | chr4:91811008-91813912   | 0 | 0 |
| Mir872        | chr4:94331847-94331928   | 0 | 0 |
| 4930579C15Rik | chr4:94573983-94595501   | 0 | 0 |
| Cyp2j13       | chr4:95709350-95744231   | 0 | 0 |
| Cyp2j12       | chr4:95766008-95807843   | 0 | 0 |
| Cyp2j5        | chr4:96294122-96330810   | 0 | 0 |
| E130114P18Rik | chr4:97234565-97251282   | 0 | 0 |
| A730085A09Rik | chr4:98460458-98465728   | 0 | 0 |
| Foxd3         | chr4:99322989-99325362   | 0 | 0 |
| Ube2u         | chr4:100151471-100222750 | 0 | 0 |
| Mir101a       | chr4:101019549-101019632 | 0 | 0 |
| Lepr          | chr4:101390011-101487959 | 0 | 0 |
| Gm12794       | chr4:101613011-101615788 | 0 | 0 |
| Gm12789       | chr4:101659444-101662836 | 0 | 0 |
| Sgip1         | chr4:102432967-102643782 | 0 | 0 |
| Gm12709       | chr4:102639870-102662360 | 0 | 0 |
| Tctex1d1      | chr4:102658983-102678199 | 0 | 0 |
| BB031773      | chr4:102676710-102684570 | 0 | 0 |
| Insl5         | chr4:102690477-102699333 | 0 | 0 |
| 4930456L15Rik | chr4:102963563-102984437 | 0 | 0 |
| LOC622167     | chr4:103055104-103164793 | 0 | 0 |
| Cdcp2         | chr4:106769495-106780353 | 0 | 0 |
| Glis1         | chr4:107107323-107307664 | 0 | 0 |
| Dmrtb1        | chr4:107348894-107356767 | 0 | 0 |
| Fam159a       | chr4:108040381-108055954 | 0 | 0 |
| Mir761        | chr4:108690259-108690335 | 0 | 0 |
| 4930522H14Rik | chr4:109177936-109203902 | 0 | 0 |
| Skint8        | chr4:111592159-111622961 | 0 | 0 |
| Skint7        | chr4:111645531-111660826 | 0 | 0 |
| Skint3        | chr4:111904849-111973073 | 0 | 0 |
| Skint9        | chr4:112058573-112106590 | 0 | 0 |
| Skint2        | chr4:112286356-112320445 | 0 | 0 |
| Skint10       | chr4:112383434-112447466 | 0 | 0 |
| Skint6        | chr4:112477220-112959578 | 0 | 0 |
| Skint5        | chr4:113150495-113672108 | 0 | 0 |
| Skint11       | chr4:113835988-113917633 | 0 | 0 |
| Tal1          | chr4:114732131-114744360 | 0 | 0 |
| Cyp4x1        | chr4:114781286-114806582 | 0 | 0 |
| Cyp4a29-ps    | chr4:114914688-114927162 | 0 | 0 |
| Cyp4a30b-ps   | chr4:115125208-115143667 | 0 | 0 |
| Cyp4a14       | chr4:115158804-115168746 | 0 | 0 |
| Gm12839       | chr4:115254642-115255732 | 0 | 0 |
| Kncn          | chr4:115557004-115560569 | 0 | 0 |
| Dmbx1         | chr4:115587723-115612531 | 0 | 0 |
| 1700042G07Rik | chr4:115845976-115846902 | 0 | 0 |
| Snord38a      | chr4:116827120-116827179 | 0 | 0 |
| Snord55       | chr4:116828375-116828453 | 0 | 0 |
| Gm1661        | chr4:116885937-116924522 | 0 | 0 |
| Mpl           | chr4:118115021-118130100 | 0 | 0 |
| Tie1          | chr4:118143795-118162454 | 0 | 0 |

|               |                          |   |   |
|---------------|--------------------------|---|---|
| Olfr62        | chr4:118338123-118339071 | 0 | 0 |
| Olfr1342      | chr4:118362107-118363055 | 0 | 0 |
| Olfr1341      | chr4:118382013-118382952 | 0 | 0 |
| Olfr1340      | chr4:118398853-118399801 | 0 | 0 |
| Olfr1339      | chr4:118407135-118408083 | 0 | 0 |
| Olfr1338      | chr4:118426199-118427141 | 0 | 0 |
| Olfr1337      | chr4:118454240-118455188 | 0 | 0 |
| Olfr1335      | chr4:118481459-118482467 | 0 | 0 |
| Olfr1333      | chr4:118502089-118503043 | 0 | 0 |
| Olfr1331      | chr4:118541387-118542341 | 0 | 0 |
| Olfr1330      | chr4:118565689-118566637 | 0 | 0 |
| Olfr1329      | chr4:118589128-118590070 | 0 | 0 |
| Olfr1328      | chr4:118606503-118607445 | 0 | 0 |
| Lao1          | chr4:118634571-118641515 | 0 | 0 |
| Guca2b        | chr4:119329207-119331550 | 0 | 0 |
| Mir30c-1      | chr4:120442138-120442227 | 0 | 0 |
| Mir30e        | chr4:120445210-120445302 | 0 | 0 |
| Rims3         | chr4:120550473-120564165 | 0 | 0 |
| Tmco2         | chr4:120778255-120781831 | 0 | 0 |
| Gm12886       | chr4:121087339-121095704 | 0 | 0 |
| Gm12887       | chr4:121286608-121294730 | 0 | 0 |
| 9530002B09Rik | chr4:122366501-122382378 | 0 | 0 |
| Nt5c1a        | chr4:122878795-122893450 | 0 | 0 |
| 1700057H15Rik | chr4:124126868-124163202 | 0 | 0 |
| 4933407E24Rik | chr4:124246421-124252781 | 0 | 0 |
| Mir697        | chr4:124408937-124409046 | 0 | 0 |
| Epha10        | chr4:124559028-124595044 | 0 | 0 |
| 1700125G02Rik | chr4:124568131-124572026 | 0 | 0 |
| Rspo1         | chr4:124663673-124686343 | 0 | 0 |
| 2610028E06Rik | chr4:125565094-125599554 | 0 | 0 |
| Gja4          | chr4:126988664-126991222 | 0 | 0 |
| CK137956      | chr4:127604835-127648085 | 0 | 0 |
| 4930465A12Rik | chr4:127810766-127844211 | 0 | 0 |
| Hmgb4         | chr4:127937455-127938139 | 0 | 0 |
| Tlr12         | chr4:128292689-128295863 | 0 | 0 |
| Fam167b       | chr4:129254058-129255824 | 0 | 0 |
| E330017L17Rik | chr4:129583469-129586240 | 0 | 0 |
| Gm853         | chr4:129886352-129899539 | 0 | 0 |
| Snord85       | chr4:130305552-130305617 | 0 | 0 |
| Matn1         | chr4:130500299-130511391 | 0 | 0 |
| Snora61       | chr4:131866221-131866283 | 0 | 0 |
| Snord99       | chr4:131866617-131866673 | 0 | 0 |
| Fgr           | chr4:132530009-132557797 | 0 | 0 |
| Mir5122       | chr4:132925690-132925779 | 0 | 0 |
| Lin28a        | chr4:133559244-133574731 | 0 | 0 |
| Grrp1         | chr4:133807024-133810021 | 0 | 0 |
| Trim63        | chr4:133871034-133885544 | 0 | 0 |
| 1700021N21Rik | chr4:134004679-134006086 | 0 | 0 |
| Mir700        | chr4:134972469-134972548 | 0 | 0 |
| 1700029M20Rik | chr4:135182569-135186113 | 0 | 0 |
| Myom3         | chr4:135315629-135371479 | 0 | 0 |
| Htr1d         | chr4:135979438-136000317 | 0 | 0 |

|               |                          |   |   |
|---------------|--------------------------|---|---|
| 4930549C01Rik | chr4:136166351-136169128 | 0 | 0 |
| Lactbl1       | chr4:136178535-136194025 | 0 | 0 |
| Gm13003       | chr4:136714996-136720981 | 0 | 0 |
| Gm13011       | chr4:136957468-136965706 | 0 | 0 |
| Cela3b        | chr4:136976922-136986435 | 0 | 0 |
| 1700013G24Rik | chr4:137009210-137011376 | 0 | 0 |
| Ldlrad2       | chr4:137126790-137131095 | 0 | 0 |
| Pla2g2d       | chr4:138331649-138338058 | 0 | 0 |
| Pla2g5        | chr4:138355161-138419384 | 0 | 0 |
| Pla2g2a       | chr4:138387771-138391104 | 0 | 0 |
| Pax7          | chr4:139293995-139388883 | 0 | 0 |
| Padi6         | chr4:140283269-140298558 | 0 | 0 |
| 4930515B02Rik | chr4:140428607-140433972 | 0 | 0 |
| Gm13031       | chr4:140503580-140513817 | 0 | 0 |
| 6330545A04Rik | chr4:140769870-140776029 | 0 | 0 |
| Clnka         | chr4:140940525-140954621 | 0 | 0 |
| Clnkb         | chr4:140960271-140971903 | 0 | 0 |
| Hspb7         | chr4:140976693-140981225 | 0 | 0 |
| Gm694         | chr4:140988586-140992020 | 0 | 0 |
| 1810035I16Rik | chr4:141400235-141402905 | 0 | 0 |
| Lrrc38        | chr4:142939652-142960931 | 0 | 0 |
| Pramel1       | chr4:142984343-142989722 | 0 | 0 |
| Oog4          | chr4:143027066-143040205 | 0 | 0 |
| Gm13040       | chr4:143101214-143107736 | 0 | 0 |
| Gm13043       | chr4:143101245-143107734 | 0 | 0 |
| Gm13057       | chr4:143125856-143132374 | 0 | 0 |
| Gm13057       | chr4:143141602-143148139 | 0 | 0 |
| BC080695      | chr4:143157369-143163701 | 0 | 0 |
| Gm13088       | chr4:143243662-143247149 | 0 | 0 |
| Gm13078       | chr4:143309357-143319061 | 0 | 0 |
| Gm13084       | chr4:143399893-143405996 | 0 | 0 |
| Gm13103       | chr4:143436399-143443540 | 0 | 0 |
| Gm13109       | chr4:143538484-143540919 | 0 | 0 |
| Pramef17      | chr4:143581021-143584272 | 0 | 0 |
| Pramel4       | chr4:143649028-143659221 | 0 | 0 |
| Gm13102       | chr4:143689782-143700004 | 0 | 0 |
| Oog3          | chr4:143747458-143752554 | 0 | 0 |
| Oog2          | chr4:143780619-143786837 | 0 | 0 |
| Pramel5       | chr4:143860535-143870369 | 0 | 0 |
| Gm13128       | chr4:143920151-143923368 | 0 | 0 |
| Gm13119       | chr4:143947866-143954322 | 0 | 0 |
| Gm13125       | chr4:143962662-143967836 | 0 | 0 |
| 1700012P22Rik | chr4:144008093-144028675 | 0 | 0 |
| Aadacl3       | chr4:144043673-144053659 | 0 | 0 |
| 9430007A20Rik | chr4:144109724-144119256 | 0 | 0 |
| Gm13124       | chr4:144144902-144155037 | 0 | 0 |
| Gm13177       | chr4:144203609-144213301 | 0 | 0 |
| Gm436         | chr4:144259839-144276271 | 0 | 0 |
| Gm13178       | chr4:144293093-144311307 | 0 | 0 |
| Gm438         | chr4:144367106-144376486 | 0 | 0 |
| Gm13242       | chr4:145260599-145294340 | 0 | 0 |
| 1700095A21Rik | chr4:145651165-145679000 | 0 | 0 |



|               |                        |   |   |
|---------------|------------------------|---|---|
| Mir1960       | chr5:30497278-30497356 | 0 | 0 |
| Otof          | chr5:30669350-30764305 | 0 | 0 |
| Cib4          | chr5:30787956-30848209 | 0 | 0 |
| Gm9899        | chr5:30876359-30890992 | 0 | 0 |
| Kcnk3         | chr5:30890542-30927643 | 0 | 0 |
| Tcf23         | chr5:31271049-31279391 | 0 | 0 |
| Trim54        | chr5:31418984-31439999 | 0 | 0 |
| Ucn           | chr5:31440361-31441268 | 0 | 0 |
| 4930548H24Rik | chr5:31788231-31790635 | 0 | 0 |
| 4930557J02Rik | chr5:34461388-34477988 | 0 | 0 |
| Mir3097       | chr5:35363697-35363764 | 0 | 0 |
| Adra2c        | chr5:35621214-35624412 | 0 | 0 |
| 4930478P22Rik | chr5:35704201-35710326 | 0 | 0 |
| Hmx1          | chr5:35731765-35735521 | 0 | 0 |
| Cpz           | chr5:35844866-35868275 | 0 | 0 |
| Cytl1         | chr5:38126757-38131059 | 0 | 0 |
| Drd5          | chr5:38710747-38713549 | 0 | 0 |
| 4930487D11Rik | chr5:38735627-38740436 | 0 | 0 |
| 4930513D17Rik | chr5:39852987-39994813 | 0 | 0 |
| Nkx3-2        | chr5:42152721-42155459 | 0 | 0 |
| C1qtnf7       | chr5:43906807-44007825 | 0 | 0 |
| Bst1          | chr5:44210131-44234707 | 0 | 0 |
| Ldb2          | chr5:44863371-45190946 | 0 | 0 |
| Clrn2         | chr5:45844989-45855388 | 0 | 0 |
| Sod3          | chr5:52755042-52760977 | 0 | 0 |
| 8030423F21Rik | chr5:52998788-53010250 | 0 | 0 |
| 5033403H07Rik | chr5:53364250-53383531 | 0 | 0 |
| Cckar         | chr5:54089723-54098943 | 0 | 0 |
| Gm10440       | chr5:54741230-54749781 | 0 | 0 |
| 4932441J04Rik | chr5:57961322-58109158 | 0 | 0 |
| 4930459L07Rik | chr5:58834478-58844237 | 0 | 0 |
| 4933402J10Rik | chr5:60354357-60377241 | 0 | 0 |
| 1700027F09Rik | chr5:64846051-64859181 | 0 | 0 |
| C030018K13Rik | chr5:64868246-64875205 | 0 | 0 |
| Mir574        | chr5:65361556-65361634 | 0 | 0 |
| Rhoh          | chr5:66254807-66287939 | 0 | 0 |
| Phox2b        | chr5:67485635-67490365 | 0 | 0 |
| C330024D21Rik | chr5:67855136-67862070 | 0 | 0 |
| 4930425K10Rik | chr5:68324850-68334320 | 0 | 0 |
| Gm5108        | chr5:68332907-68368309 | 0 | 0 |
| Grxcr1        | chr5:68423073-68557637 | 0 | 0 |
| Yipf7         | chr5:69907908-69933886 | 0 | 0 |
| Gabrg1        | chr5:71142285-71233856 | 0 | 0 |
| Gabra2        | chr5:71352295-71487088 | 0 | 0 |
| Gabra4        | chr5:71960972-72049547 | 0 | 0 |
| Zar1          | chr5:72968352-72972323 | 0 | 0 |
| Cnga1         | chr5:72994935-73033991 | 0 | 0 |
| Txk           | chr5:73087216-73144012 | 0 | 0 |
| Snora26       | chr5:74489554-74489675 | 0 | 0 |
| Gm6116        | chr5:75345218-75362393 | 0 | 0 |
| Gsx2          | chr5:75471625-75473918 | 0 | 0 |
| Gm19583       | chr5:75506345-75543132 | 0 | 0 |

|               |                        |   |   |
|---------------|------------------------|---|---|
| Kdr           | chr5:76329298-76374453 | 0 | 0 |
| Gm7271        | chr5:76913101-76945653 | 0 | 0 |
| Mir5098       | chr5:77701781-77701863 | 0 | 0 |
| Pea15b        | chr5:77940219-77940773 | 0 | 0 |
| Mir1187       | chr5:83227968-83228090 | 0 | 0 |
| Tecrl         | chr5:83707146-83784220 | 0 | 0 |
| Stap1         | chr5:86500852-86533018 | 0 | 0 |
| Gnrhr         | chr5:86611022-86626895 | 0 | 0 |
| Ugt2b34       | chr5:87318794-87335962 | 0 | 0 |
| Ugt2b1        | chr5:87345663-87355528 | 0 | 0 |
| Ugt2b35       | chr5:87429884-87442299 | 0 | 0 |
| Ugt2b36       | chr5:87494951-87521580 | 0 | 0 |
| Ugt2b5        | chr5:87553971-87569365 | 0 | 0 |
| Ugt2b37       | chr5:87669516-87683813 | 0 | 0 |
| Ugt2a3        | chr5:87753996-87766220 | 0 | 0 |
| Ugt2b38       | chr5:87838964-87853228 | 0 | 0 |
| Ugt2a1        | chr5:87888514-87919896 | 0 | 0 |
| Ugt2a2        | chr5:87888517-87911283 | 0 | 0 |
| Sult1e1       | chr5:88004992-88020636 | 0 | 0 |
| Mir3969       | chr5:88024926-88025018 | 0 | 0 |
| Csn1s1        | chr5:88095248-88111599 | 0 | 0 |
| Csn1s2a       | chr5:88203591-88217822 | 0 | 0 |
| Csn1s2b       | chr5:88237146-88253446 | 0 | 0 |
| 4930432K09Rik | chr5:88254721-88275411 | 0 | 0 |
| Gm7337        | chr5:88279383-88282037 | 0 | 0 |
| Odam          | chr5:88314719-88321767 | 0 | 0 |
| 1700066N21Rik | chr5:88337612-88408376 | 0 | 0 |
| Csn3          | chr5:88354657-88361289 | 0 | 0 |
| 4931407G18Rik | chr5:88408475-88410566 | 0 | 0 |
| Smr3a         | chr5:88431549-88437559 | 0 | 0 |
| Smr2          | chr5:88515580-88538078 | 0 | 0 |
| Gm7714        | chr5:88697943-88711860 | 0 | 0 |
| Prol1         | chr5:88746336-88757842 | 0 | 0 |
| Amtn          | chr5:88805132-88814941 | 0 | 0 |
| Ambn          | chr5:88885035-88897554 | 0 | 0 |
| Enam          | chr5:88916999-88935074 | 0 | 0 |
| Gc            | chr5:89846535-89886923 | 0 | 0 |
| Npffr2        | chr5:89956453-90012765 | 0 | 0 |
| Gm7056        | chr5:90045460-90051636 | 0 | 0 |
| Afp           | chr5:90919739-90937933 | 0 | 0 |
| Ppbp          | chr5:91197543-91199086 | 0 | 0 |
| Pf4           | chr5:91201460-91202409 | 0 | 0 |
| Gm19619       | chr5:91686596-91712102 | 0 | 0 |
| 1700063O14Rik | chr5:92195267-92196326 | 0 | 0 |
| Cxcl9         | chr5:92750356-92757105 | 0 | 0 |
| Cxcl11        | chr5:92788570-92792322 | 0 | 0 |
| C87414        | chr5:94064210-94100489 | 0 | 0 |
| BC061212      | chr5:94495479-94499571 | 0 | 0 |
| A430089I19Rik | chr5:94731543-94735821 | 0 | 0 |
| Gm3139        | chr5:94955308-94967392 | 0 | 0 |
| AU018829      | chr5:95294540-95307276 | 0 | 0 |
| Gm16367       | chr5:95294551-95306423 | 0 | 0 |

|               |                          |   |   |
|---------------|--------------------------|---|---|
| A430089I19Rik | chr5:95380098-95384376   | 0 | 0 |
| Gm6367        | chr5:95417718-95455565   | 0 | 0 |
| AU018829      | chr5:95611642-95624361   | 0 | 0 |
| Gm16367       | chr5:95611653-95623508   | 0 | 0 |
| D5ErtD577e    | chr5:95885824-95914608   | 0 | 0 |
| Gm3286        | chr5:95902559-95914124   | 0 | 0 |
| Gm3286        | chr5:95939760-95951421   | 0 | 0 |
| BC061212      | chr5:96161110-96165192   | 0 | 0 |
| E330014E10Rik | chr5:96204888-96233249   | 0 | 0 |
| Gm3286        | chr5:96221657-96233254   | 0 | 0 |
| Cxcl13        | chr5:96385957-96390087   | 0 | 0 |
| Fgf5          | chr5:98683202-98706049   | 0 | 0 |
| Prkg2         | chr5:99358791-99466098   | 0 | 0 |
| A930011G23Rik | chr5:99726262-100158079  | 0 | 0 |
| Nkx6-1        | chr5:102088215-102093730 | 0 | 0 |
| 4930429D17Rik | chr5:103659393-103728048 | 0 | 0 |
| 1700016H13Rik | chr5:104077605-104084751 | 0 | 0 |
| Hsd17b13      | chr5:104384460-104406407 | 0 | 0 |
| Gm17660       | chr5:104499079-104506627 | 0 | 0 |
| Sparcl1       | chr5:104508127-104543107 | 0 | 0 |
| Dspp          | chr5:104599730-104609146 | 0 | 0 |
| Dmp1          | chr5:104631635-104643121 | 0 | 0 |
| lbsp          | chr5:104728305-104740491 | 0 | 0 |
| Mepe          | chr5:104754347-104767630 | 0 | 0 |
| Abcg3         | chr5:105364075-105411736 | 0 | 0 |
| Barhl2        | chr5:106881541-106887185 | 0 | 0 |
| Lpcat2b       | chr5:107860567-107864058 | 0 | 0 |
| 4930428O21Rik | chr5:108127230-108132499 | 0 | 0 |
| Tmed11        | chr5:109206253-109224382 | 0 | 0 |
| Vmn2r8        | chr5:109226211-109237773 | 0 | 0 |
| Vmn2r10       | chr5:109424557-109435455 | 0 | 0 |
| Vmn2r11       | chr5:109475891-109488471 | 0 | 0 |
| Vmn2r12       | chr5:109514867-109526883 | 0 | 0 |
| Vmn2r13       | chr5:109585086-109621126 | 0 | 0 |
| Vmn2r17       | chr5:109849031-109882406 | 0 | 0 |
| Gm1679        | chr5:110783114-110785106 | 0 | 0 |
| Galnt9        | chr5:110973363-111050401 | 0 | 0 |
| Mir701        | chr5:111433162-111433271 | 0 | 0 |
| E130006D01Rik | chr5:112163303-112190748 | 0 | 0 |
| 1700028D13Rik | chr5:112635782-112639022 | 0 | 0 |
| Cryba4        | chr5:112675552-112681522 | 0 | 0 |
| Crybb1        | chr5:112684840-112698602 | 0 | 0 |
| Asphd2        | chr5:112814465-112821233 | 0 | 0 |
| Gm6588        | chr5:112878445-112880758 | 0 | 0 |
| 1700034G24Rik | chr5:113011955-113019016 | 0 | 0 |
| Crybb2        | chr5:113487284-113497786 | 0 | 0 |
| Aym1          | chr5:113786313-113786841 | 0 | 0 |
| Wscd2         | chr5:113919466-114039679 | 0 | 0 |
| 1700069L16Rik | chr5:114142432-114174781 | 0 | 0 |
| Dao           | chr5:114453834-114475469 | 0 | 0 |
| Svop          | chr5:114476921-114541389 | 0 | 0 |
| Tmem233       | chr5:116490542-116533255 | 0 | 0 |



|               |                          |   |   |
|---------------|--------------------------|---|---|
| Hrk           | chr5:118619772-118639487 | 0 | 0 |
| 4930413E15Rik | chr5:119402347-119411270 | 0 | 0 |
| Gm7538        | chr5:119644321-119650027 | 0 | 0 |
| G630008E18    | chr5:120075950-120084471 | 0 | 0 |
| Tbx5          | chr5:120284671-120335227 | 0 | 0 |
| Lhx5          | chr5:120881894-120891466 | 0 | 0 |
| Oas1e         | chr5:121236320-121245539 | 0 | 0 |
| Oas1d         | chr5:121364826-121371656 | 0 | 0 |
| Rph3a         | chr5:121390508-121459527 | 0 | 0 |
| Myl2          | chr5:122550988-122556863 | 0 | 0 |
| Il31          | chr5:123930161-123932110 | 0 | 0 |
| Lrrc43        | chr5:123939333-123958213 | 0 | 0 |
| 4933438B17Rik | chr5:127511158-127568899 | 0 | 0 |
| 4930572K03Rik | chr5:127650934-127664726 | 0 | 0 |
| Tmem132c      | chr5:127722195-128046160 | 0 | 0 |
| 1700085B03Rik | chr5:127737229-127761993 | 0 | 0 |
| Tmem132d      | chr5:128263860-128938937 | 0 | 0 |
| 13-Sep        | chr5:130189265-130214386 | 0 | 0 |
| Snora15       | chr5:130300436-130300552 | 0 | 0 |
| Caln1         | chr5:130845327-131316515 | 0 | 0 |
| A330070K13Rik | chr5:130854720-130860501 | 0 | 0 |
| Wbscr17       | chr5:131350820-131783392 | 0 | 0 |
| Wbscr28       | chr5:135377463-135382603 | 0 | 0 |
| Cldn13        | chr5:135390119-135391400 | 0 | 0 |
| Fzd9          | chr5:135724807-135726917 | 0 | 0 |
| Fkbp6         | chr5:135767573-135825861 | 0 | 0 |
| Trim50        | chr5:135829165-135843524 | 0 | 0 |
| Ccl26         | chr5:136036317-136039439 | 0 | 0 |
| Ccl24         | chr5:136045806-136048913 | 0 | 0 |
| Styx11        | chr5:136223089-136254255 | 0 | 0 |
| Upk3b         | chr5:136514365-136520863 | 0 | 0 |
| Mir721        | chr5:136851585-136851673 | 0 | 0 |
| Myl10         | chr5:137169015-137176964 | 0 | 0 |
| Emid2         | chr5:137217633-137358977 | 0 | 0 |
| Vgf           | chr5:137506164-137509221 | 0 | 0 |
| Epo           | chr5:137924247-137927044 | 0 | 0 |
| Actl6b        | chr5:137994782-138010801 | 0 | 0 |
| Irs3          | chr5:138084259-138086942 | 0 | 0 |
| Gjc3          | chr5:138395036-138404187 | 0 | 0 |
| Azgp1         | chr5:138422748-138431460 | 0 | 0 |
| Smok3a        | chr5:138462503-138475893 | 0 | 0 |
| Smok3b        | chr5:138478451-138491861 | 0 | 0 |
| Mir25         | chr5:138606548-138606632 | 0 | 0 |
| Mir93         | chr5:138606750-138606838 | 0 | 0 |
| Mir106b       | chr5:138606964-138607046 | 0 | 0 |
| BC055004      | chr5:138667131-138693103 | 0 | 0 |
| Gm5294        | chr5:139296033-139297573 | 0 | 0 |
| Mir339        | chr5:139845603-139845699 | 0 | 0 |
| 4930500L23Rik | chr5:139999704-140017293 | 0 | 0 |
| Uncx          | chr5:140019851-140024132 | 0 | 0 |
| Grifin        | chr5:141039142-141041021 | 0 | 0 |
| Radil         | chr5:142960794-143027031 | 0 | 0 |

|               |                          |   |   |
|---------------|--------------------------|---|---|
| Pap0lb        | chr5:143003693-143006030 | 0 | 0 |
| Mmd2          | chr5:143039434-143084706 | 0 | 0 |
| Tff1          | chr5:143285576-143289234 | 0 | 0 |
| Cngb1         | chr5:143419271-143435263 | 0 | 0 |
| Spdyb         | chr5:143977994-143987561 | 0 | 0 |
| 4930448H16Rik | chr5:143988670-143996427 | 0 | 0 |
| Ocm           | chr5:144780675-144811478 | 0 | 0 |
| Kpna7         | chr5:145744612-145770505 | 0 | 0 |
| Gm4871        | chr5:145790468-145793633 | 0 | 0 |
| 1700018F24Rik | chr5:145803858-145806547 | 0 | 0 |
| Cyp3a57       | chr5:146106138-146151381 | 0 | 0 |
| Cyp3a16       | chr5:146197177-146230592 | 0 | 0 |
| Cyp3a41a      | chr5:146319532-146345599 | 0 | 0 |
| Cyp3a41a      | chr5:146505623-146531712 | 0 | 0 |
| Cyp3a44       | chr5:146585558-146617450 | 0 | 0 |
| Cyp3a11       | chr5:146666182-146691430 | 0 | 0 |
| Cyp3a25       | chr5:146788769-146821194 | 0 | 0 |
| Cyp3a59       | chr5:146890833-146924859 | 0 | 0 |
| Gm6408        | chr5:147293518-147296278 | 0 | 0 |
| Gm6370        | chr5:147302938-147305708 | 0 | 0 |
| Gm3415        | chr5:147313952-147328478 | 0 | 0 |
| 4930449I24Rik | chr5:147313974-147316759 | 0 | 0 |
| Gm3402        | chr5:147325698-147328478 | 0 | 0 |
| Gm3404        | chr5:147337376-147340129 | 0 | 0 |
| Gm3409        | chr5:147349223-147352003 | 0 | 0 |
| Gm3415        | chr5:147367688-147370491 | 0 | 0 |
| Gm3402        | chr5:147367711-147370491 | 0 | 0 |
| Gpr12         | chr5:147393725-147396815 | 0 | 0 |
| Gsx1          | chr5:148000271-148002522 | 0 | 0 |
| 2210019I11Rik | chr5:148040173-148083097 | 0 | 0 |
| Pdx1          | chr5:148081706-148086725 | 0 | 0 |
| Cdx2          | chr5:148112475-148118825 | 0 | 0 |
| Prhoxnb       | chr5:148126559-148134016 | 0 | 0 |
| D5Ert605e     | chr5:148230195-148234620 | 0 | 0 |
| 2210417A02Rik | chr5:149553415-149554715 | 0 | 0 |
| 8430423G03Rik | chr5:149761825-149763234 | 0 | 0 |
| 4930500F04Rik | chr5:150650321-150666855 | 0 | 0 |
| Rxfp2         | chr5:150821249-150884761 | 0 | 0 |
| Gm5           | chr5:151302321-151304794 | 0 | 0 |
| Zar1l         | chr5:151309643-151320734 | 0 | 0 |
| Kl            | chr5:151755181-151796392 | 0 | 0 |
| Calcr         | chr6:3635719-3714713     | 0 | 0 |
| Mir653        | chr6:3671300-3671385     | 0 | 0 |
| Mir489        | chr6:3671896-3672003     | 0 | 0 |
| Tfpi2         | chr6:3912594-3918354     | 0 | 0 |
| Gng11         | chr6:3953986-3958445     | 0 | 0 |
| Col1a2        | chr6:4455696-4491543     | 0 | 0 |
| Sgce          | chr6:4624349-4697204     | 0 | 0 |
| 1700019G24Rik | chr6:5913896-5927393     | 0 | 0 |
| Dlx6as1       | chr6:6770545-6819533     | 0 | 0 |
| Dlx6          | chr6:6813333-6817970     | 0 | 0 |
| Dlx6as2       | chr6:6813796-6815150     | 0 | 0 |



|               |                        |   |   |
|---------------|------------------------|---|---|
| Prss2         | chr6:41471774-41475078 | 0 | 0 |
| 1700034O15Rik | chr6:41634429-41635716 | 0 | 0 |
| Kel           | chr6:41636328-41654324 | 0 | 0 |
| Olfr459       | chr6:41721351-41722296 | 0 | 0 |
| Pip           | chr6:41797547-41802061 | 0 | 0 |
| Sval2         | chr6:41810337-41814321 | 0 | 0 |
| Sval1         | chr6:41901626-41906097 | 0 | 0 |
| Sval3         | chr6:41918138-41923089 | 0 | 0 |
| Sva           | chr6:41988392-41992850 | 0 | 0 |
| Olfr453       | chr6:42694037-42694991 | 0 | 0 |
| Olfr38        | chr6:42712052-42713006 | 0 | 0 |
| Olfr452       | chr6:42740039-42740993 | 0 | 0 |
| Olfr450       | chr6:42767471-42768404 | 0 | 0 |
| Olfr449       | chr6:42787881-42788817 | 0 | 0 |
| Olfr448       | chr6:42846451-42847384 | 0 | 0 |
| Olfr447       | chr6:42861523-42862456 | 0 | 0 |
| Olfr446       | chr6:42877231-42878158 | 0 | 0 |
| Olfr444       | chr6:42905498-42906431 | 0 | 0 |
| Olfr441       | chr6:43065742-43066675 | 0 | 0 |
| Olfr237-ps1   | chr6:43103305-43104238 | 0 | 0 |
| Olfr437       | chr6:43117058-43117991 | 0 | 0 |
| Olfr13        | chr6:43123986-43124919 | 0 | 0 |
| Olfr435       | chr6:43151644-43152586 | 0 | 0 |
| Olfr434       | chr6:43166913-43167879 | 0 | 0 |
| Olfr47        | chr6:43185608-43186574 | 0 | 0 |
| Mir704        | chr6:47753574-47753651 | 0 | 0 |
| Gimap4        | chr6:48634576-48642061 | 0 | 0 |
| Gimap6        | chr6:48651581-48658243 | 0 | 0 |
| Gimap7        | chr6:48668619-48674635 | 0 | 0 |
| Gimap3        | chr6:48714462-48720850 | 0 | 0 |
| Doxl2         | chr6:48925141-48928744 | 0 | 0 |
| Svs1          | chr6:48936859-48941723 | 0 | 0 |
| Gpymb         | chr6:48986516-49008181 | 0 | 0 |
| Stk31         | chr6:49345602-49419501 | 0 | 0 |
| Npy           | chr6:49772727-49779504 | 0 | 0 |
| Npvf          | chr6:50600869-50604392 | 0 | 0 |
| Mir148a       | chr6:51219810-51219909 | 0 | 0 |
| 2700086A05Rik | chr6:52151122-52163596 | 0 | 0 |
| Hoxa6         | chr6:52156363-52158623 | 0 | 0 |
| Mira          | chr6:52164489-52165287 | 0 | 0 |
| Hoxa9         | chr6:52174052-52177369 | 0 | 0 |
| Mir196b       | chr6:52180079-52180164 | 0 | 0 |
| Hoxa10        | chr6:52181195-52190853 | 0 | 0 |
| Hoxa11        | chr6:52192104-52195766 | 0 | 0 |
| Hoxa11as      | chr6:52195241-52199768 | 0 | 0 |
| Hoxa13        | chr6:52208851-52210874 | 0 | 0 |
| 5730457N03Rik | chr6:52258382-52264826 | 0 | 0 |
| Evx1          | chr6:52263491-52268372 | 0 | 0 |
| 1700094M24Rik | chr6:52442444-52450079 | 0 | 0 |
| 9430076C15Rik | chr6:53237288-53347210 | 0 | 0 |
| Crhr2         | chr6:55040041-55082966 | 0 | 0 |
| Inmt          | chr6:55120620-55124984 | 0 | 0 |





|               |                          |   |   |
|---------------|--------------------------|---|---|
| Vmn1r54       | chr6:90219099-90220047   | 0 | 0 |
| BC048671      | chr6:90251263-90255442   | 0 | 0 |
| Chst13        | chr6:90258344-90275179   | 0 | 0 |
| Uroc1         | chr6:90283282-90314542   | 0 | 0 |
| AY512915      | chr6:95240567-95283987   | 0 | 0 |
| 1700123L14Rik | chr6:96114496-96116199   | 0 | 0 |
| Fam19a4       | chr6:96781202-97010405   | 0 | 0 |
| Gm765         | chr6:98188007-98292748   | 0 | 0 |
| 1700049E22Rik | chr6:100477393-100483420 | 0 | 0 |
| Gm9871        | chr6:101724242-101751976 | 0 | 0 |
| Cntn6         | chr6:104443037-104813399 | 0 | 0 |
| Il5ra         | chr6:106660372-106699031 | 0 | 0 |
| 1700054K19Rik | chr6:112160701-112162512 | 0 | 0 |
| D630042P16Rik | chr6:112309317-112338017 | 0 | 0 |
| Cav3          | chr6:112409498-112422866 | 0 | 0 |
| Cidec         | chr6:113374629-113385749 | 0 | 0 |
| Olfr211       | chr6:116443628-116444558 | 0 | 0 |
| Olfr212       | chr6:116456533-116467983 | 0 | 0 |
| Olfr213       | chr6:116490472-116491456 | 0 | 0 |
| Olfr214       | chr6:116506444-116507407 | 0 | 0 |
| Olfr215       | chr6:116532029-116532962 | 0 | 0 |
| 1700030F04Rik | chr6:117629224-117701787 | 0 | 0 |
| 1700069P05Rik | chr6:118196712-118198472 | 0 | 0 |
| Mir706        | chr6:119984245-119984329 | 0 | 0 |
| Cecr6         | chr6:120438956-120443825 | 0 | 0 |
| 1700072O05Rik | chr6:120504813-120524222 | 0 | 0 |
| Iqsec3        | chr6:121322950-121423696 | 0 | 0 |
| A2m           | chr6:121586190-121629256 | 0 | 0 |
| Mug1          | chr6:121788558-121839075 | 0 | 0 |
| Mug2          | chr6:121956815-122035985 | 0 | 0 |
| Gm10319       | chr6:122086645-122100976 | 0 | 0 |
| Mug-ps1       | chr6:122126070-122198584 | 0 | 0 |
| Klrg1         | chr6:122220618-122232851 | 0 | 0 |
| Rimklb        | chr6:122403626-122436323 | 0 | 0 |
| Gdf3          | chr6:122555420-122560089 | 0 | 0 |
| Nanog         | chr6:122657585-122663796 | 0 | 0 |
| Nanogpd       | chr6:122657800-122663573 | 0 | 0 |
| Clec4a3       | chr6:122902532-122919896 | 0 | 0 |
| Clec4a4       | chr6:122940384-122974439 | 0 | 0 |
| Clec4b1       | chr6:122999979-123021573 | 0 | 0 |
| Clec4b2       | chr6:123123040-123154689 | 0 | 0 |
| Vmn2r19       | chr6:123258350-123286555 | 0 | 0 |
| Vmn2r23       | chr6:123652838-123692257 | 0 | 0 |
| Vmn2r27       | chr6:124141613-124181802 | 0 | 0 |
| 1700013D24Rik | chr6:124297611-124307104 | 0 | 0 |
| C1rb          | chr6:124520447-124531062 | 0 | 0 |
| Gm5077        | chr6:124574642-124586103 | 0 | 0 |
| Mir141        | chr6:124667931-124668003 | 0 | 0 |
| Mir200c       | chr6:124668339-124668408 | 0 | 0 |
| Scarna10      | chr6:125136378-125136449 | 0 | 0 |
| Tuba3a        | chr6:125228291-125236060 | 0 | 0 |
| Kcna5         | chr6:126482568-126485573 | 0 | 0 |

|               |                          |   |   |
|---------------|--------------------------|---|---|
| Kcna1         | chr6:126586480-126595819 | 0 | 0 |
| Akap3         | chr6:126803115-126824326 | 0 | 0 |
| Dyrk4         | chr6:126826216-126871857 | 0 | 0 |
| Fgf6          | chr6:126965559-126974736 | 0 | 0 |
| Prmt8         | chr6:127639026-127719177 | 0 | 0 |
| Clec2h        | chr6:128612402-128627392 | 0 | 0 |
| 4930431A04Rik | chr6:128656525-128673064 | 0 | 0 |
| BC035044      | chr6:128798061-128841142 | 0 | 0 |
| Clec2i        | chr6:128837631-128846866 | 0 | 0 |
| Clec2e        | chr6:129041833-129050921 | 0 | 0 |
| Cd69          | chr6:129217342-129225387 | 0 | 0 |
| 4922502D21Rik | chr6:129272182-129281799 | 0 | 0 |
| Clec12b       | chr6:129325530-129335892 | 0 | 0 |
| Clec1b        | chr6:129347314-129355431 | 0 | 0 |
| Clec9a        | chr6:129358879-129374782 | 0 | 0 |
| Clec1a        | chr6:129376701-129402018 | 0 | 0 |
| Clec7a        | chr6:129411608-129422795 | 0 | 0 |
| Olr1          | chr6:129435265-129457183 | 0 | 0 |
| D630042F21Rik | chr6:129462574-129469245 | 0 | 0 |
| Klre1         | chr6:129528303-129535845 | 0 | 0 |
| Klrd1         | chr6:129541828-129548793 | 0 | 0 |
| Klrk1         | chr6:129560338-129573859 | 0 | 0 |
| Klrc3         | chr6:129589102-129593306 | 0 | 0 |
| Klrc2         | chr6:129606363-129610614 | 0 | 0 |
| Klrc1         | chr6:129624876-129628928 | 0 | 0 |
| Mir680-1      | chr6:129641552-129641661 | 0 | 0 |
| Klri1         | chr6:129647235-129667150 | 0 | 0 |
| Klri2         | chr6:129679058-129690502 | 0 | 0 |
| Gm156         | chr6:129716664-129725867 | 0 | 0 |
| Klra17        | chr6:129781171-129826690 | 0 | 0 |
| Klra5         | chr6:129849008-129863242 | 0 | 0 |
| Klra22        | chr6:129922099-130330826 | 0 | 0 |
| Klra15        | chr6:129922110-130330680 | 0 | 0 |
| Klra18        | chr6:129993749-130017276 | 0 | 0 |
| Klra4         | chr6:129994034-130017289 | 0 | 0 |
| Klra12        | chr6:129994041-130256499 | 0 | 0 |
| Klra33        | chr6:129994056-130015320 | 0 | 0 |
| Klra13-ps     | chr6:130241178-130256450 | 0 | 0 |
| Klra23        | chr6:130241178-130258379 | 0 | 0 |
| Klra1         | chr6:130313935-130336892 | 0 | 0 |
| Klra6         | chr6:129963050-129976972 | 0 | 0 |
| Klra19        | chr6:129963051-129976978 | 0 | 0 |
| Klra21        | chr6:130032615-130079897 | 0 | 0 |
| Klra8         | chr6:130065243-130079916 | 0 | 0 |
| Klra14        | chr6:130099123-130110766 | 0 | 0 |
| Klra9         | chr6:130128699-130143130 | 0 | 0 |
| Klra7         | chr6:130168622-130183340 | 0 | 0 |
| Klra10        | chr6:130219211-130231946 | 0 | 0 |
| Klra3         | chr6:130273304-130287644 | 0 | 0 |
| Klra2         | chr6:131169252-131197380 | 0 | 0 |
| Gm4736        | chr6:132064238-132314153 | 0 | 0 |
| Gm8882        | chr6:132311122-132314152 | 0 | 0 |



|               |                          |   |   |
|---------------|--------------------------|---|---|
| Prb1          | chr6:132156812-132160539 | 0 | 0 |
| Prpmp5        | chr6:132261607-132264761 | 0 | 0 |
| 5530400C23Rik | chr6:133242233-133245808 | 0 | 0 |
| Gm5885        | chr6:133479206-133482780 | 0 | 0 |
| Gm5886        | chr6:133714016-133717421 | 0 | 0 |
| Kap           | chr6:133799872-133803685 | 0 | 0 |
| Gprc5d        | chr6:135056008-135068301 | 0 | 0 |
| E330021D16Rik | chr6:136350340-136364090 | 0 | 0 |
| Gucy2c        | chr6:136645804-136730263 | 0 | 0 |
| Mgp           | chr6:136820955-136824326 | 0 | 0 |
| Erp27         | chr6:136855907-136870701 | 0 | 0 |
| Pde6h         | chr6:136903043-136912004 | 0 | 0 |
| Ptpro         | chr6:137200819-137413154 | 0 | 0 |
| Lmo3          | chr6:138313001-138530489 | 0 | 0 |
| Igbp1b        | chr6:138605613-138606965 | 0 | 0 |
| 4922502N22Rik | chr6:139264117-139271097 | 0 | 0 |
| Rergl         | chr6:139441702-139450430 | 0 | 0 |
| Plcz1         | chr6:139938242-139989938 | 0 | 0 |
| Capza3        | chr6:139990045-139991307 | 0 | 0 |
| Gm10400       | chr6:141289073-141292908 | 0 | 0 |
| Slco1c1       | chr6:141472906-141518698 | 0 | 0 |
| Slco1b2       | chr6:141578038-141635156 | 0 | 0 |
| Slco1a4       | chr6:141753960-141804692 | 0 | 0 |
| Slco1a1       | chr6:141855801-141895483 | 0 | 0 |
| Gm6614        | chr6:141920716-141957266 | 0 | 0 |
| Slco1a6       | chr6:142034288-142134670 | 0 | 0 |
| Iapp          | chr6:142246944-142252339 | 0 | 0 |
| Gys2          | chr6:142371132-142421629 | 0 | 0 |
| Kcnj8         | chr6:142513458-142519876 | 0 | 0 |
| 5330439B14Rik | chr6:142563114-142574982 | 0 | 0 |
| Gm7457        | chr6:142762750-142782014 | 0 | 0 |
| St8sia1       | chr6:142770060-142912972 | 0 | 0 |
| 1700060C16Rik | chr6:143541872-143599808 | 0 | 0 |
| 4933425H06Rik | chr6:144621387-144642352 | 0 | 0 |
| 1700073E17Rik | chr6:145336144-145340743 | 0 | 0 |
| Iftld1        | chr6:145345754-145383445 | 0 | 0 |
| Tuba3b        | chr6:145564482-145569997 | 0 | 0 |
| 1700023A16Rik | chr6:146798631-146819926 | 0 | 0 |
| 1700049E15Rik | chr6:147638762-147650896 | 0 | 0 |
| Speer9-ps1    | chr7:3128145-3144993     | 0 | 0 |
| AU018091      | chr7:3154659-3169204     | 0 | 0 |
| Mir290        | chr7:3218626-3218709     | 0 | 0 |
| Mir291a       | chr7:3218919-3219001     | 0 | 0 |
| Mir292        | chr7:3219189-3219271     | 0 | 0 |
| Mir291b       | chr7:3219482-3219561     | 0 | 0 |
| Mir293        | chr7:3220343-3220423     | 0 | 0 |
| Mir294        | chr7:3220641-3220725     | 0 | 0 |
| Mir295        | chr7:3220773-3220842     | 0 | 0 |
| Nlrp12        | chr7:3221510-3249741     | 0 | 0 |
| Cacng8        | chr7:3394458-3415366     | 0 | 0 |
| Cacng6        | chr7:3425422-3435658     | 0 | 0 |
| Tarm1         | chr7:3489956-3503433     | 0 | 0 |

|               |                        |   |   |
|---------------|------------------------|---|---|
| Oscar         | chr7:3561416-3567735   | 0 | 0 |
| Mir3572       | chr7:3607563-3607649   | 0 | 0 |
| 9430041J12Rik | chr7:4025726-4072330   | 0 | 0 |
| Lilra5        | chr7:4189355-4195065   | 0 | 0 |
| Ncr1          | chr7:4289325-4296766   | 0 | 0 |
| Gp6           | chr7:4320314-4349346   | 0 | 0 |
| Fam71e2       | chr7:4704828-4722872   | 0 | 0 |
| Vmn1r55       | chr7:5098091-5099024   | 0 | 0 |
| Vmn1r56       | chr7:5146517-5148349   | 0 | 0 |
| Vmn1r57       | chr7:5172079-5173012   | 0 | 0 |
| Nlrp2         | chr7:5250148-5302637   | 0 | 0 |
| Vmn1r59       | chr7:5405428-5406361   | 0 | 0 |
| Vmn2r28       | chr7:5432057-5445453   | 0 | 0 |
| Vmn1r60       | chr7:5495798-5496701   | 0 | 0 |
| Vmn1r61       | chr7:5562012-5562915   | 0 | 0 |
| Vmn1r62       | chr7:5626205-5628199   | 0 | 0 |
| Vmn1r186      | chr7:5626923-5627826   | 0 | 0 |
| Vmn1r63       | chr7:5753949-5757047   | 0 | 0 |
| Vmn1r187      | chr7:5754330-5755233   | 0 | 0 |
| Vmn1r64       | chr7:5835181-5836144   | 0 | 0 |
| Nlrp4c        | chr7:5996762-6056751   | 0 | 0 |
| Galp          | chr7:6148691-6167739   | 0 | 0 |
| Zscan5b       | chr7:6173879-6191014   | 0 | 0 |
| Gm6792        | chr7:6204311-6233463   | 0 | 0 |
| Gm16532       | chr7:6367885-6383797   | 0 | 0 |
| Olfr1344      | chr7:6392612-6393578   | 0 | 0 |
| Olfr1336      | chr7:6413221-6414166   | 0 | 0 |
| Olfr1346      | chr7:6426822-6427764   | 0 | 0 |
| Olfr5         | chr7:6432926-6439524   | 0 | 0 |
| Olfr1347      | chr7:6440623-6441583   | 0 | 0 |
| Olfr1348      | chr7:6453996-6454935   | 0 | 0 |
| Olfr1349      | chr7:6467184-6468138   | 0 | 0 |
| Zim1          | chr7:6628153-6649143   | 0 | 0 |
| Usp29         | chr7:6683451-6919931   | 0 | 0 |
| Zim3          | chr7:6908396-6929373   | 0 | 0 |
| Mir3099       | chr7:6756297-6756381   | 0 | 0 |
| Aurkc         | chr7:6948095-6955802   | 0 | 0 |
| Vmn2r40       | chr7:9246438-9270107   | 0 | 0 |
| Vmn2r51       | chr7:10672546-10691008 | 0 | 0 |
| Vmn2r52       | chr7:10744000-10761635 | 0 | 0 |
| Vmn1r66       | chr7:10859176-10860700 | 0 | 0 |
| Vmn1r67       | chr7:11032137-11033136 | 0 | 0 |
| Vmn1r68       | chr7:11112558-11113518 | 0 | 0 |
| Vmn1r69       | chr7:11165104-11166836 | 0 | 0 |
| Vmn1r70       | chr7:11218935-11219832 | 0 | 0 |
| Nlrp4b        | chr7:11273141-11315507 | 0 | 0 |
| Vmn1r71       | chr7:11332850-11334887 | 0 | 0 |
| Zscan4a       | chr7:11379589-11384414 | 0 | 0 |
| Zscan4b       | chr7:11486088-11490399 | 0 | 0 |
| Zscan4c       | chr7:11591093-11595896 | 0 | 0 |
| Zscan4d       | chr7:11746991-11751497 | 0 | 0 |
| Zscan4e       | chr7:11891726-11896031 | 0 | 0 |

|               |                        |   |   |
|---------------|------------------------|---|---|
| Zscan4f       | chr7:11983263-11987667 | 0 | 0 |
| Vmn1r72       | chr7:12254947-12255868 | 0 | 0 |
| Vmn1r73       | chr7:12341605-12342517 | 0 | 0 |
| Vmn1r74       | chr7:12432123-12433038 | 0 | 0 |
| Vmn1r75       | chr7:12465691-12466609 | 0 | 0 |
| Vmn1r76       | chr7:12515659-12516634 | 0 | 0 |
| Vmn1r78       | chr7:12737812-12738754 | 0 | 0 |
| Vmn1r79       | chr7:12761541-12762462 | 0 | 0 |
| Vmn1r80       | chr7:12778313-12779240 | 0 | 0 |
| Gm4224        | chr7:12806664-12811156 | 0 | 0 |
| Vmn1r81       | chr7:12845107-12846028 | 0 | 0 |
| Vmn1r82       | chr7:12890153-12891068 | 0 | 0 |
| Vmn1r83       | chr7:12906556-12907477 | 0 | 0 |
| Vmn1r84       | chr7:12947156-12948113 | 0 | 0 |
| 2900092C05Rik | chr7:13097899-13141670 | 0 | 0 |
| Vmn2r53       | chr7:13166818-13191893 | 0 | 0 |
| Vmn2r54       | chr7:13200581-13221483 | 0 | 0 |
| Vmn2r55       | chr7:13237054-13270340 | 0 | 0 |
| Vmn2r56       | chr7:13279346-13318454 | 0 | 0 |
| Vmn1r85       | chr7:13669637-13670564 | 0 | 0 |
| Vmn1r86       | chr7:13687345-13688296 | 0 | 0 |
| Vmn1r87       | chr7:13716819-13717707 | 0 | 0 |
| Vmn1r88       | chr7:13763067-13764018 | 0 | 0 |
| Vmn1r89       | chr7:13804687-13805638 | 0 | 0 |
| Cabp5         | chr7:13983503-13994227 | 0 | 0 |
| Bsph1         | chr7:14036189-14058798 | 0 | 0 |
| 9230107M04Rik | chr7:14140214-14156416 | 0 | 0 |
| Sult2a5       | chr7:14209315-14256156 | 0 | 0 |
| Sult2a2       | chr7:14318854-14364986 | 0 | 0 |
| Sult2a1       | chr7:14381594-14422759 | 0 | 0 |
| Sult2a4       | chr7:14495025-14574937 | 0 | 0 |
| Sult2a3       | chr7:14652903-14708342 | 0 | 0 |
| Sult2a6       | chr7:14807751-14840219 | 0 | 0 |
| 2810007J24Rik | chr7:14996034-15031936 | 0 | 0 |
| Sult2a7       | chr7:15050507-15078275 | 0 | 0 |
| Gm4745        | chr7:15245056-15251345 | 0 | 0 |
| Obox2         | chr7:15974199-15983892 | 0 | 0 |
| Obox1         | chr7:16132605-16142195 | 0 | 0 |
| Obox3         | chr7:16210654-16225126 | 0 | 0 |
| Obox5         | chr7:16335718-16344623 | 0 | 0 |
| Obox6         | chr7:16418598-16425028 | 0 | 0 |
| Crx           | chr7:16451295-16465304 | 0 | 0 |
| Snord23       | chr7:16524110-16524209 | 0 | 0 |
| Zfp541        | chr7:16657290-16681677 | 0 | 0 |
| C5ar1         | chr7:16832091-16844889 | 0 | 0 |
| Npas1         | chr7:17041069-17062129 | 0 | 0 |
| Ceacam-ps1    | chr7:17234378-17242827 | 0 | 0 |
| Ceacam15      | chr7:17256679-17261054 | 0 | 0 |
| Ceacam9       | chr7:17307277-17311459 | 0 | 0 |
| Ptgir         | chr7:17491838-17496254 | 0 | 0 |
| Ceacam3       | chr7:17735748-17748580 | 0 | 0 |
| Psg29         | chr7:17788825-17801105 | 0 | 0 |

|            |                        |   |   |
|------------|------------------------|---|---|
| Psg-ps1    | chr7:18257661-18267409 | 0 | 0 |
| Ceacam5    | chr7:18298600-18346470 | 0 | 0 |
| Ceacam14   | chr7:18398030-18400976 | 0 | 0 |
| Ceacam11   | chr7:18557515-18563905 | 0 | 0 |
| Ceacam13   | chr7:18595237-18604569 | 0 | 0 |
| Ceacam12   | chr7:18651277-18663335 | 0 | 0 |
| Igfl3      | chr7:18761842-18767211 | 0 | 0 |
| Mill1      | chr7:18830695-18851441 | 0 | 0 |
| Psg18      | chr7:18931156-18940356 | 0 | 0 |
| Psg28      | chr7:19007884-19017404 | 0 | 0 |
| Psg27      | chr7:19141862-19152654 | 0 | 0 |
| Psg21      | chr7:19232002-19242074 | 0 | 0 |
| Psg22      | chr7:19303438-19312597 | 0 | 0 |
| Psg19      | chr7:19374473-19383859 | 0 | 0 |
| Psg17      | chr7:19399285-19406940 | 0 | 0 |
| Nanos2     | chr7:19572872-19574311 | 0 | 0 |
| Mir3100    | chr7:19672176-19672241 | 0 | 0 |
| Mir330     | chr7:19766813-19766911 | 0 | 0 |
| Mir343     | chr7:19971991-19972066 | 0 | 0 |
| Apoc2      | chr7:20256927-20262213 | 0 | 0 |
| Apoc4      | chr7:20263442-20266765 | 0 | 0 |
| Nlrp9b     | chr7:20593371-20648287 | 0 | 0 |
| Vmn1r91    | chr7:20686506-20687430 | 0 | 0 |
| Gm16442    | chr7:20707004-20707928 | 0 | 0 |
| Gm10666    | chr7:20723471-20724437 | 0 | 0 |
| Vmn1r94    | chr7:20752808-20753726 | 0 | 0 |
| Vmn1r143   | chr7:20779058-20779982 | 0 | 0 |
| Gm6164     | chr7:20790032-20790956 | 0 | 0 |
| Vmn1r118   | chr7:20818256-20819177 | 0 | 0 |
| Gm4187     | chr7:20918490-20919414 | 0 | 0 |
| Vmn1r-ps79 | chr7:20941974-20944267 | 0 | 0 |
| Gm8660     | chr7:20959841-20960759 | 0 | 0 |
| Vmn1r100   | chr7:21003290-21004214 | 0 | 0 |
| Vmn1r149   | chr7:21027018-21027942 | 0 | 0 |
| Gm10670    | chr7:21059308-21060274 | 0 | 0 |
| Vmn1r103   | chr7:21094965-21095883 | 0 | 0 |
| Vmn1r104   | chr7:21119185-21120109 | 0 | 0 |
| Gm8677     | chr7:21130182-21131106 | 0 | 0 |
| Gm4141     | chr7:21160669-21161590 | 0 | 0 |
| Gm4541     | chr7:21196232-21215690 | 0 | 0 |
| Vmn1r165   | chr7:21254266-21255190 | 0 | 0 |
| Gm8693     | chr7:21287647-21288568 | 0 | 0 |
| Gm4567     | chr7:21309847-21315960 | 0 | 0 |
| Vmn1r157   | chr7:21357946-21358840 | 0 | 0 |
| Vmn1r130   | chr7:21453935-21454859 | 0 | 0 |
| Vmn1r111   | chr7:21487314-21488235 | 0 | 0 |
| Gm4567     | chr7:21509530-21515643 | 0 | 0 |
| Vmn1r112   | chr7:21556203-21557097 | 0 | 0 |
| Vmn1r113   | chr7:21572303-21573227 | 0 | 0 |
| Vmn1r114   | chr7:21596239-21597205 | 0 | 0 |
| Vmn1r115   | chr7:21629116-21630004 | 0 | 0 |
| Vmn1r116   | chr7:21657274-21658198 | 0 | 0 |

|            |                        |   |   |
|------------|------------------------|---|---|
| Vmn1r117   | chr7:21668216-21669140 | 0 | 0 |
| Gm4498     | chr7:21696445-21697366 | 0 | 0 |
| Vmn1r119   | chr7:21796550-21797474 | 0 | 0 |
| Vmn1r120   | chr7:21837885-21838803 | 0 | 0 |
| Vmn1r121   | chr7:21882587-21883532 | 0 | 0 |
| Vmn1r122   | chr7:21918229-21919147 | 0 | 0 |
| Vmn1r123   | chr7:21947203-21948127 | 0 | 0 |
| Vmn1r124   | chr7:22044712-22045636 | 0 | 0 |
| Vmn1r125   | chr7:22057197-22058121 | 0 | 0 |
| Vmn1r126   | chr7:22085520-22086486 | 0 | 0 |
| Gm4175     | chr7:22085544-22086486 | 0 | 0 |
| Vmn1r127   | chr7:22103962-22104880 | 0 | 0 |
| Vmn1r128   | chr7:22134391-22135315 | 0 | 0 |
| Vmn1r129   | chr7:22145386-22146310 | 0 | 0 |
| Gm4541     | chr7:22230791-22250942 | 0 | 0 |
| Vmn1r107   | chr7:22296798-22297722 | 0 | 0 |
| Gm4179     | chr7:22330188-22331109 | 0 | 0 |
| Vmn1r132   | chr7:22397763-22400165 | 0 | 0 |
| Vmn1r139   | chr7:22399110-22400004 | 0 | 0 |
| Gm4175     | chr7:22545549-22546494 | 0 | 0 |
| Gm4177     | chr7:22580829-22581747 | 0 | 0 |
| Vmn1r163   | chr7:22617369-22618293 | 0 | 0 |
| Gm5725     | chr7:22628362-22629286 | 0 | 0 |
| Gm10662    | chr7:22694452-22706308 | 0 | 0 |
| Gm5891     | chr7:22694452-22706310 | 0 | 0 |
| Gm4541     | chr7:22713597-22733746 | 0 | 0 |
| Vmn1r165   | chr7:22779605-22780529 | 0 | 0 |
| Vmn1r111   | chr7:22812995-22813916 | 0 | 0 |
| Vmn1r132   | chr7:22880538-22882940 | 0 | 0 |
| Vmn1r139   | chr7:22881885-22882779 | 0 | 0 |
| Gm16442    | chr7:22902340-22903264 | 0 | 0 |
| Gm10666    | chr7:22918794-22919760 | 0 | 0 |
| Vmn1r94    | chr7:22948136-22949054 | 0 | 0 |
| Vmn1r143   | chr7:22974395-22975319 | 0 | 0 |
| Gm6164     | chr7:22985359-22986283 | 0 | 0 |
| Vmn1r118   | chr7:23013582-23014503 | 0 | 0 |
| Gm4133     | chr7:23113812-23114736 | 0 | 0 |
| Vmn1r-ps79 | chr7:23137281-23139574 | 0 | 0 |
| Gm8660     | chr7:23155140-23156058 | 0 | 0 |
| Vmn1r148   | chr7:23197249-23199687 | 0 | 0 |
| Vmn1r100   | chr7:23198601-23199525 | 0 | 0 |
| Vmn1r149   | chr7:23222324-23223248 | 0 | 0 |
| Gm10670    | chr7:23248128-23249094 | 0 | 0 |
| Vmn1r151   | chr7:23283779-23284697 | 0 | 0 |
| Vmn1r152   | chr7:23307985-23308909 | 0 | 0 |
| Gm5726     | chr7:23318982-23319906 | 0 | 0 |
| Gm4201     | chr7:23349441-23350362 | 0 | 0 |
| Gm4541     | chr7:23385002-23404469 | 0 | 0 |
| Vmn1r165   | chr7:23443036-23443960 | 0 | 0 |
| Gm8693     | chr7:23476415-23477336 | 0 | 0 |
| Gm4567     | chr7:23498616-23504729 | 0 | 0 |
| Vmn1r157   | chr7:23546715-23547609 | 0 | 0 |

|               |                        |   |   |
|---------------|------------------------|---|---|
| Vmn1r158      | chr7:23574877-23575801 | 0 | 0 |
| Vmn1r159      | chr7:23627706-23628624 | 0 | 0 |
| Vmn1r160      | chr7:23656242-23657166 | 0 | 0 |
| Gm4214        | chr7:23768747-23769692 | 0 | 0 |
| Gm4216        | chr7:23804024-23804942 | 0 | 0 |
| Vmn1r163      | chr7:23840558-23841482 | 0 | 0 |
| Gm5725        | chr7:23851551-23852475 | 0 | 0 |
| Gm10662       | chr7:23917641-23929497 | 0 | 0 |
| Gm5891        | chr7:23917641-23929499 | 0 | 0 |
| Gm4541        | chr7:23936779-23963780 | 0 | 0 |
| Vmn1r107      | chr7:24002350-24003274 | 0 | 0 |
| Vmn1r111      | chr7:24035780-24036701 | 0 | 0 |
| Nlrp4e        | chr7:24086210-24147296 | 0 | 0 |
| Nlrp5         | chr7:24170915-24226940 | 0 | 0 |
| Vmn1r167      | chr7:24289660-24290608 | 0 | 0 |
| Vmn1r168      | chr7:24325738-24326668 | 0 | 0 |
| Vmn1r169      | chr7:24362203-24363118 | 0 | 0 |
| Vmn1r170      | chr7:24391193-24392108 | 0 | 0 |
| Vmn1r171      | chr7:24417006-24418587 | 0 | 0 |
| Vmn1r172      | chr7:24443334-24445682 | 0 | 0 |
| Vmn1r173      | chr7:24487360-24488302 | 0 | 0 |
| Vmn1r174      | chr7:24538929-24539871 | 0 | 0 |
| Vmn1r175      | chr7:24593304-24594219 | 0 | 0 |
| Vmn1r176      | chr7:24619830-24620745 | 0 | 0 |
| Vmn1r177      | chr7:24650538-24651468 | 0 | 0 |
| Vmn1r178      | chr7:24678547-24679462 | 0 | 0 |
| Vmn1r179      | chr7:24713404-24714376 | 0 | 0 |
| Vmn1r180      | chr7:24737405-24738375 | 0 | 0 |
| Vmn1r181      | chr7:24768979-24770067 | 0 | 0 |
| V1rd18        | chr7:24788109-24789266 | 0 | 0 |
| V1rd19        | chr7:24788129-24789047 | 0 | 0 |
| Vmn1r183      | chr7:24839792-24840710 | 0 | 0 |
| Gm4598        | chr7:25446312-25448128 | 0 | 0 |
| Tex101        | chr7:25453030-25457069 | 0 | 0 |
| Lypd4         | chr7:25649638-25654710 | 0 | 0 |
| D930028M14Rik | chr7:25937475-25941649 | 0 | 0 |
| Cyp2b13       | chr7:26846513-26881215 | 0 | 0 |
| Cyp2b9        | chr7:26958427-26995679 | 0 | 0 |
| Vmn1r184      | chr7:27051849-27052794 | 0 | 0 |
| Nlrp4a        | chr7:27220131-27260477 | 0 | 0 |
| Nlrp9a        | chr7:27320083-27359165 | 0 | 0 |
| Vmn1r185      | chr7:27396137-27397097 | 0 | 0 |
| Cyp2b23       | chr7:27450245-27471449 | 0 | 0 |
| Cyp2a22       | chr7:27716649-27724405 | 0 | 0 |
| Cyp2a12       | chr7:27814108-27821834 | 0 | 0 |
| Mir3101       | chr7:27961024-27961112 | 0 | 0 |
| Mia1          | chr7:27964759-27966168 | 0 | 0 |
| LOC100302567  | chr7:29136558-29136652 | 0 | 0 |
| Lrfn1         | chr7:29237003-29252567 | 0 | 0 |
| 1700028B04Rik | chr7:29281959-29282511 | 0 | 0 |
| Sycn          | chr7:29325903-29327229 | 0 | 0 |
| C330005M16Rik | chr7:29392655-29416034 | 0 | 0 |

|               |                        |   |   |
|---------------|------------------------|---|---|
| Mir1963       | chr7:29868654-29868713 | 0 | 0 |
| Catsperg2     | chr7:30482237-30512034 | 0 | 0 |
| Mir1964       | chr7:30558312-30558395 | 0 | 0 |
| Kirrel2       | chr7:31232784-31242534 | 0 | 0 |
| Nphs1as       | chr7:31247182-31250610 | 0 | 0 |
| Prodh2        | chr7:31278676-31298421 | 0 | 0 |
| Gm1082        | chr7:31300140-31307212 | 0 | 0 |
| 4930479M11Rik | chr7:31455740-31456624 | 0 | 0 |
| 2200002J24Rik | chr7:31483944-31485553 | 0 | 0 |
| Ffar2         | chr7:31603375-31608794 | 0 | 0 |
| Ffar3         | chr7:31639348-31641197 | 0 | 0 |
| Ffar1         | chr7:31645586-31646489 | 0 | 0 |
| Cd22          | chr7:31650422-31665361 | 0 | 0 |
| Mag           | chr7:31684201-31699851 | 0 | 0 |
| Hamp2         | chr7:31707390-31709200 | 0 | 0 |
| Abph          | chr7:32075537-32076835 | 0 | 0 |
| Abpe          | chr7:32087787-32089996 | 0 | 0 |
| Gm5325        | chr7:32160610-32161935 | 0 | 0 |
| Gm4684        | chr7:32488797-32490773 | 0 | 0 |
| Gm5326        | chr7:33226559-33227863 | 0 | 0 |
| Gm5894        | chr7:34063384-34065360 | 0 | 0 |
| Abpd          | chr7:34149361-34151338 | 0 | 0 |
| Scgb2b1-ps    | chr7:34410163-34438300 | 0 | 0 |
| Abpz          | chr7:34522211-34524314 | 0 | 0 |
| Gm12769       | chr7:34528817-34530122 | 0 | 0 |
| Abpg          | chr7:34728015-34730004 | 0 | 0 |
| Abpb          | chr7:34796950-34798961 | 0 | 0 |
| Abpa          | chr7:34806585-34807900 | 0 | 0 |
| Gm12776       | chr7:34880449-34885856 | 0 | 0 |
| Plekhf1       | chr7:39005672-39013013 | 0 | 0 |
| Gm5591        | chr7:39303157-39313212 | 0 | 0 |
| Gm16387       | chr7:46511993-46519904 | 0 | 0 |
| Gm5114        | chr7:46662663-46668530 | 0 | 0 |
| 4933402C06Rik | chr7:47930106-47946630 | 0 | 0 |
| A230077H06Rik | chr7:48104522-48153694 | 0 | 0 |
| Vstm2b        | chr7:48154647-48185338 | 0 | 0 |
| 4930433I11Rik | chr7:48242978-48250203 | 0 | 0 |
| Gm4884        | chr7:48288088-48300672 | 0 | 0 |
| Gm5592        | chr7:48539696-48545553 | 0 | 0 |
| Vmn2r-ps54    | chr7:48923383-48982563 | 0 | 0 |
| Vmn2r58       | chr7:49092250-49128040 | 0 | 0 |
| Vmn2r59       | chr7:49267161-49314351 | 0 | 0 |
| Vmn2r60       | chr7:49371840-49451146 | 0 | 0 |
| Vmn2r61       | chr7:49515422-49556125 | 0 | 0 |
| Vmn2r-ps60    | chr7:49685474-49685739 | 0 | 0 |
| 4933421I07Rik | chr7:49700831-49703450 | 0 | 0 |
| Siglec5       | chr7:50606774-50614840 | 0 | 0 |
| Siglecg       | chr7:50663649-50673719 | 0 | 0 |
| Lim2          | chr7:50685470-50691361 | 0 | 0 |
| Nkg7          | chr7:50692507-50693616 | 0 | 0 |
| Cldnd2        | chr7:50696185-50698690 | 0 | 0 |
| 4931406B18Rik | chr7:50747413-50761308 | 0 | 0 |

|               |                        |   |   |
|---------------|------------------------|---|---|
| Klk6          | chr7:51079913-51087397 | 0 | 0 |
| Klk4          | chr7:51136541-51141174 | 0 | 0 |
| Klk15         | chr7:51189140-51194960 | 0 | 0 |
| Klk1b7-ps     | chr7:51200381-51201297 | 0 | 0 |
| Klk1b8        | chr7:51206041-51210308 | 0 | 0 |
| Klk1b1        | chr7:51222137-51226685 | 0 | 0 |
| Klk1b9        | chr7:51231430-51235746 | 0 | 0 |
| Klk1b26       | chr7:51268047-51272335 | 0 | 0 |
| Egfbp2        | chr7:51268053-51272339 | 0 | 0 |
| Klk1b21       | chr7:51357661-51361949 | 0 | 0 |
| Klk1b22       | chr7:51368052-51372246 | 0 | 0 |
| Klk1b16       | chr7:51392136-51396974 | 0 | 0 |
| Klk1b24       | chr7:51443632-51447821 | 0 | 0 |
| Klk1b4        | chr7:51462804-51467124 | 0 | 0 |
| Snord88c      | chr7:51505224-51505308 | 0 | 0 |
| Snord88a      | chr7:51505519-51505591 | 0 | 0 |
| Lrrc4b        | chr7:51697856-51718714 | 0 | 0 |
| Izumo2        | chr7:51964112-51975212 | 0 | 0 |
| Mir707        | chr7:52105068-52105141 | 0 | 0 |
| Mir150        | chr7:52377126-52377191 | 0 | 0 |
| Snord35b      | chr7:52378395-52378481 | 0 | 0 |
| Snord33       | chr7:52382233-52382315 | 0 | 0 |
| Mir5121       | chr7:52382287-52382361 | 0 | 0 |
| Snord35a      | chr7:52381716-52381805 | 0 | 0 |
| Snord34       | chr7:52381972-52382038 | 0 | 0 |
| Snord32a      | chr7:52382752-52382833 | 0 | 0 |
| Slc17a7       | chr7:52419290-52431509 | 0 | 0 |
| Pth2          | chr7:52436364-52437208 | 0 | 0 |
| Ccdc155       | chr7:52439045-52460262 | 0 | 0 |
| 1700039E15Rik | chr7:52538242-52544363 | 0 | 0 |
| Ntn5          | chr7:52939783-52949924 | 0 | 0 |
| Saa3          | chr7:53967367-53971046 | 0 | 0 |
| Saa4          | chr7:53983368-53987913 | 0 | 0 |
| Saa1          | chr7:53995868-53998350 | 0 | 0 |
| Saa2          | chr7:54007202-54009684 | 0 | 0 |
| Mrgpra6       | chr7:54441135-54444725 | 0 | 0 |
| Mrgpra1       | chr7:54590244-54609610 | 0 | 0 |
| Mrgpra2a      | chr7:54681698-54707509 | 0 | 0 |
| Mrgpra2b      | chr7:54719176-54744952 | 0 | 0 |
| Mrgpra3       | chr7:54844319-54856742 | 0 | 0 |
| Mrgpra4       | chr7:55236163-55237666 | 0 | 0 |
| Mrgprx1       | chr7:55276340-55282967 | 0 | 0 |
| Mrgprb5       | chr7:55423386-55424355 | 0 | 0 |
| Mrgprb4       | chr7:55453582-55454548 | 0 | 0 |
| Mrgprb8       | chr7:55643895-55645018 | 0 | 0 |
| Mrgprb1       | chr7:55699482-55711712 | 0 | 0 |
| Mrgprx2       | chr7:55733988-55754640 | 0 | 0 |
| Mrgprb2       | chr7:55806335-55813456 | 0 | 0 |
| Mrgprb3       | chr7:55898232-55899171 | 0 | 0 |
| Csrp3         | chr7:56085767-56103421 | 0 | 0 |
| 1700081H22Rik | chr7:57772678-57831254 | 0 | 0 |
| 4933405O20Rik | chr7:57854559-57855898 | 0 | 0 |





|               |                          |   |   |
|---------------|--------------------------|---|---|
| BC048679      | chr7:88639159-88643216   | 0 | 0 |
| Mir1839       | chr7:88674801-88674874   | 0 | 0 |
| LOC434205     | chr7:89215272-89226644   | 0 | 0 |
| 4933430H16Rik | chr7:90086447-90119901   | 0 | 0 |
| Olfr291       | chr7:92002080-92005828   | 0 | 0 |
| Olfr290       | chr7:92064290-92065238   | 0 | 0 |
| Vmn2r65       | chr7:92088678-92112519   | 0 | 0 |
| Vmn2r66       | chr7:92143154-92160530   | 0 | 0 |
| Vmn2r67       | chr7:92284749-92304412   | 0 | 0 |
| Vmn2r68-ps    | chr7:92370027-92386214   | 0 | 0 |
| Vmn2r69       | chr7:92554885-92564186   | 0 | 0 |
| Vmn2r70       | chr7:92707212-92717598   | 0 | 0 |
| Vmn2r71       | chr7:92763971-92773057   | 0 | 0 |
| Vmn2r72-ps    | chr7:92886293-92903491   | 0 | 0 |
| Vmn2r73       | chr7:93006056-93024448   | 0 | 0 |
| Vmn2r74       | chr7:93100376-93109992   | 0 | 0 |
| Vmn2r75       | chr7:93296551-93320234   | 0 | 0 |
| Vmn2r76       | chr7:93373715-93394711   | 0 | 0 |
| Olfr310       | chr7:93417239-93418321   | 0 | 0 |
| Olfr309       | chr7:93454694-93455621   | 0 | 0 |
| Olfr308       | chr7:93469533-93470460   | 0 | 0 |
| Olfr307       | chr7:93483962-93484904   | 0 | 0 |
| Olfr305       | chr7:93511885-93512845   | 0 | 0 |
| Olfr304       | chr7:93534166-93535168   | 0 | 0 |
| Olfr303       | chr7:93543046-93544006   | 0 | 0 |
| Olfr301       | chr7:93552358-93561809   | 0 | 0 |
| Olfr299       | chr7:93613922-93614915   | 0 | 0 |
| Olfr298       | chr7:93637060-93638059   | 0 | 0 |
| Olfr297       | chr7:93675268-93676201   | 0 | 0 |
| Olfr295       | chr7:93733786-93734716   | 0 | 0 |
| Olfr294       | chr7:93764145-93765153   | 0 | 0 |
| Olfr293       | chr7:93812173-93813184   | 0 | 0 |
| Olfr292       | chr7:93836850-93843894   | 0 | 0 |
| Folh1         | chr7:93867485-93924374   | 0 | 0 |
| Vmn2r77       | chr7:93943650-93960542   | 0 | 0 |
| Nox4          | chr7:94395304-94547116   | 0 | 0 |
| Fam181b       | chr7:100228388-100230231 | 0 | 0 |
| Gdpd4         | chr7:105068467-105198173 | 0 | 0 |
| Snord15a      | chr7:106631294-106631442 | 0 | 0 |
| Mir326        | chr7:106700778-106700873 | 0 | 0 |
| Olfr520       | chr7:106883654-106884605 | 0 | 0 |
| Olfr521       | chr7:106915673-106916639 | 0 | 0 |
| Mir3102       | chr7:108030819-108030923 | 0 | 0 |
| Mir139        | chr7:108623889-108623957 | 0 | 0 |
| Olfr544       | chr7:109632627-109636821 | 0 | 0 |
| Olfr545       | chr7:109642336-109643287 | 0 | 0 |
| Olfr547       | chr7:109683262-109684202 | 0 | 0 |
| Olfr549       | chr7:109702799-109703750 | 0 | 0 |
| Olfr550       | chr7:109726982-109728020 | 0 | 0 |
| Olfr551       | chr7:109736254-109737333 | 0 | 0 |
| Olfr552       | chr7:109752869-109753823 | 0 | 0 |
| Olfr553       | chr7:109762520-109763501 | 0 | 0 |

|         |                          |   |   |
|---------|--------------------------|---|---|
| Olfr554 | chr7:109788761-109789715 | 0 | 0 |
| Olfr555 | chr7:109807336-109808284 | 0 | 0 |
| Olfr556 | chr7:109818414-109819437 | 0 | 0 |
| Olfr557 | chr7:109846729-109847786 | 0 | 0 |
| Olfr558 | chr7:109850836-109860568 | 0 | 0 |
| Olfr33  | chr7:109861968-109862925 | 0 | 0 |
| Olfr559 | chr7:109872045-109873002 | 0 | 0 |
| Olfr78  | chr7:109889234-109907985 | 0 | 0 |
| Olfr560 | chr7:109901496-109902441 | 0 | 0 |
| Olfr561 | chr7:109923039-109923984 | 0 | 0 |
| Olfr564 | chr7:109951993-109952944 | 0 | 0 |
| Olfr566 | chr7:110004834-110005785 | 0 | 0 |
| Olfr568 | chr7:110025635-110026577 | 0 | 0 |
| Olfr569 | chr7:110035720-110036665 | 0 | 0 |
| Olfr570 | chr7:110048882-110049821 | 0 | 0 |
| Olfr571 | chr7:110057382-110058351 | 0 | 0 |
| Olfr572 | chr7:110076143-110077100 | 0 | 0 |
| Olfr574 | chr7:110096980-110098021 | 0 | 0 |
| Olfr575 | chr7:110103177-110104134 | 0 | 0 |
| Olfr576 | chr7:110113615-110114554 | 0 | 0 |
| Olfr577 | chr7:110121565-110122504 | 0 | 0 |
| Olfr578 | chr7:110132734-110133676 | 0 | 0 |
| Olfr582 | chr7:110189994-110190954 | 0 | 0 |
| Olfr583 | chr7:110199813-110200773 | 0 | 0 |
| Olfr584 | chr7:110234033-110234993 | 0 | 0 |
| Olfr585 | chr7:110246256-110247213 | 0 | 0 |
| Olfr586 | chr7:110270342-110271296 | 0 | 0 |
| Olfr589 | chr7:110303305-110304259 | 0 | 0 |
| Olfr591 | chr7:110321204-110322149 | 0 | 0 |
| Olfr592 | chr7:110335116-110336055 | 0 | 0 |
| Olfr593 | chr7:110360375-110361359 | 0 | 0 |
| Olfr594 | chr7:110368233-110369169 | 0 | 0 |
| Usp-ps  | chr7:110397851-110403414 | 0 | 0 |
| Dub2a   | chr7:110398599-110401019 | 0 | 0 |
| Olfr596 | chr7:110458236-110459175 | 0 | 0 |
| Olfr597 | chr7:110468926-110469874 | 0 | 0 |
| Olfr598 | chr7:110477001-110477961 | 0 | 0 |
| Olfr599 | chr7:110486569-110487517 | 0 | 0 |
| Olfr600 | chr7:110494495-110495440 | 0 | 0 |
| Olfr601 | chr7:110506737-110507727 | 0 | 0 |
| Olfr603 | chr7:110531575-110532514 | 0 | 0 |
| Usp17l5 | chr7:110565209-110567688 | 0 | 0 |
| Olfr605 | chr7:110590653-110591664 | 0 | 0 |
| Olfr606 | chr7:110599852-110600812 | 0 | 0 |
| Olfr608 | chr7:110618554-110619505 | 0 | 0 |
| Olfr609 | chr7:110640430-110641390 | 0 | 0 |
| Olfr610 | chr7:110654510-110655458 | 0 | 0 |
| Olfr611 | chr7:110665924-110666896 | 0 | 0 |
| Olfr612 | chr7:110686774-110687746 | 0 | 0 |
| Olfr615 | chr7:110708992-110709934 | 0 | 0 |
| Olfr616 | chr7:110712837-110713791 | 0 | 0 |
| Olfr617 | chr7:110732537-110733494 | 0 | 0 |

|               |                          |   |   |
|---------------|--------------------------|---|---|
| Olfr618       | chr7:110745831-110746788 | 0 | 0 |
| Olfr619       | chr7:110752102-110753225 | 0 | 0 |
| Olfr620       | chr7:110759923-110760865 | 0 | 0 |
| Olfr622       | chr7:110787698-110788652 | 0 | 0 |
| Olfr623       | chr7:110808757-110809832 | 0 | 0 |
| Olfr624       | chr7:110818616-110819543 | 0 | 0 |
| Olfr243       | chr7:110865109-110866060 | 0 | 0 |
| Olfr628       | chr7:110880441-110881392 | 0 | 0 |
| Olfr629       | chr7:110888714-110889836 | 0 | 0 |
| Olfr630       | chr7:110902663-110905864 | 0 | 0 |
| Olfr67        | chr7:110935725-110940344 | 0 | 0 |
| Hbb-bh2       | chr7:110987637-110989035 | 0 | 0 |
| Hbb-bh1       | chr7:110990151-110991676 | 0 | 0 |
| Hbb-y         | chr7:111000267-111001721 | 0 | 0 |
| Olfr66        | chr7:111029819-111030755 | 0 | 0 |
| Olfr64        | chr7:111041323-111042985 | 0 | 0 |
| Olfr65        | chr7:111054855-111055961 | 0 | 0 |
| Olfr631       | chr7:111063575-111078425 | 0 | 0 |
| Olfr632       | chr7:111085895-111086849 | 0 | 0 |
| Olfr633       | chr7:111095081-111096020 | 0 | 0 |
| Olfr638       | chr7:111151772-111152738 | 0 | 0 |
| Olfr639       | chr7:111160263-111161214 | 0 | 0 |
| Olfr640       | chr7:111169885-111170830 | 0 | 0 |
| Olfr641       | chr7:111188311-111189250 | 0 | 0 |
| Olfr642       | chr7:111197921-111198866 | 0 | 0 |
| Olfr643       | chr7:111207169-111208114 | 0 | 0 |
| Olfr644       | chr7:111216598-111217543 | 0 | 0 |
| Olfr645       | chr7:111232644-111233592 | 0 | 0 |
| Olfr646       | chr7:111254794-111255733 | 0 | 0 |
| 4931431F19Rik | chr7:111276426-111278337 | 0 | 0 |
| UbqIn3        | chr7:111289136-111291786 | 0 | 0 |
| UbqInl        | chr7:111296772-111299070 | 0 | 0 |
| Olfr648       | chr7:111327969-111328920 | 0 | 0 |
| Olfr649       | chr7:111337780-111338719 | 0 | 0 |
| Trim6         | chr7:111367308-111383666 | 0 | 0 |
| LOC622070     | chr7:111463544-111473352 | 0 | 0 |
| Trim30b       | chr7:111503911-111507160 | 0 | 0 |
| Trim30e-ps1   | chr7:111681472-111683875 | 0 | 0 |
| Olfr651       | chr7:111701397-111702466 | 0 | 0 |
| Olfr652       | chr7:111712665-111713726 | 0 | 0 |
| Olfr653       | chr7:111728137-111729183 | 0 | 0 |
| Olfr654       | chr7:111736268-111737294 | 0 | 0 |
| Olfr655       | chr7:111744766-111745693 | 0 | 0 |
| Olfr656       | chr7:111766170-111767160 | 0 | 0 |
| Olfr657       | chr7:111784189-111785149 | 0 | 0 |
| Olfr658       | chr7:111791393-111795819 | 0 | 0 |
| Olfr659       | chr7:111819217-111820186 | 0 | 0 |
| Olfr661       | chr7:111836530-111837490 | 0 | 0 |
| Olfr663       | chr7:111852082-111853117 | 0 | 0 |
| Dub1a         | chr7:111988825-111991018 | 0 | 0 |
| Dub1          | chr7:112005529-112011181 | 0 | 0 |
| Olfr665       | chr7:112029222-112030173 | 0 | 0 |

|              |                          |   |   |
|--------------|--------------------------|---|---|
| Olfr666      | chr7:112041183-112042140 | 0 | 0 |
| Olfr667      | chr7:112064827-112065808 | 0 | 0 |
| Olfr668      | chr7:112073319-112074276 | 0 | 0 |
| Olfr669      | chr7:112087041-112087995 | 0 | 0 |
| Olfr670      | chr7:112108305-112109244 | 0 | 0 |
| Olfr671      | chr7:112123555-112124497 | 0 | 0 |
| Olfr672      | chr7:112144477-112145416 | 0 | 0 |
| Olfr675      | chr7:112172538-112173480 | 0 | 0 |
| Olfr676      | chr7:112183713-112184667 | 0 | 0 |
| Olfr677      | chr7:112204761-112205700 | 0 | 0 |
| Olfr678      | chr7:112217982-112218924 | 0 | 0 |
| Olfr679      | chr7:112234231-112235179 | 0 | 0 |
| Olfr681      | chr7:112269972-112270920 | 0 | 0 |
| Olfr683      | chr7:112291863-112292823 | 0 | 0 |
| Olfr684      | chr7:112305255-112306194 | 0 | 0 |
| Olfr685      | chr7:112328874-112329825 | 0 | 0 |
| Olfr686      | chr7:112351901-112352855 | 0 | 0 |
| Olfr688      | chr7:112436608-112437574 | 0 | 0 |
| Olfr689      | chr7:112462519-112463482 | 0 | 0 |
| Olfr690      | chr7:112477730-112478792 | 0 | 0 |
| Cckbr        | chr7:112574333-112584852 | 0 | 0 |
| Gm18853      | chr7:113072848-113077205 | 0 | 0 |
| Gm17757      | chr7:113072857-113077205 | 0 | 0 |
| Gm8989       | chr7:113219245-113221378 | 0 | 0 |
| Gm18853      | chr7:113329256-113333613 | 0 | 0 |
| Gm17757      | chr7:113329265-113333613 | 0 | 0 |
| Gm8989       | chr7:113465909-113468042 | 0 | 0 |
| Gm4759       | chr7:113565063-113584587 | 0 | 0 |
| Olfr693      | chr7:113821047-113821999 | 0 | 0 |
| Olfr694      | chr7:113832295-113833243 | 0 | 0 |
| Olfr695      | chr7:113857245-113859859 | 0 | 0 |
| Olfr697      | chr7:113884421-113885470 | 0 | 0 |
| Olfr698      | chr7:113895964-113896900 | 0 | 0 |
| Olfr699      | chr7:113933562-113934513 | 0 | 0 |
| Olfr700      | chr7:113949023-113949974 | 0 | 0 |
| Olfr701      | chr7:113957657-113964223 | 0 | 0 |
| Olfr702      | chr7:113967002-113970257 | 0 | 0 |
| Olfr703      | chr7:113988126-113989086 | 0 | 0 |
| Olfr704      | chr7:114008495-114009443 | 0 | 0 |
| Olfr705      | chr7:114016806-114017757 | 0 | 0 |
| Olfr707      | chr7:114034697-114035621 | 0 | 0 |
| Olfr1532-ps1 | chr7:114057713-114058637 | 0 | 0 |
| Olfr710      | chr7:114087580-114091826 | 0 | 0 |
| Olfr6        | chr7:114099497-114100448 | 0 | 0 |
| Olfr711      | chr7:114114881-114118965 | 0 | 0 |
| Olfr2        | chr7:114144388-114146119 | 0 | 0 |
| Olfr713      | chr7:114179649-114180624 | 0 | 0 |
| Olfr714      | chr7:114217343-114218297 | 0 | 0 |
| Olfr17       | chr7:114240980-114241928 | 0 | 0 |
| Gm10081      | chr7:114249425-114250373 | 0 | 0 |
| Olfr715      | chr7:114271865-114272996 | 0 | 0 |
| Olfr716      | chr7:114290831-114291776 | 0 | 0 |

|               |                          |   |   |
|---------------|--------------------------|---|---|
| Nlrp14        | chr7:114310503-114341617 | 0 | 0 |
| Rbmxl2        | chr7:114352958-114354430 | 0 | 0 |
| Olfrml1       | chr7:114710946-114734879 | 0 | 0 |
| Ovch2         | chr7:114925057-114944693 | 0 | 0 |
| Olfr467       | chr7:114958099-114959020 | 0 | 0 |
| Olfr469       | chr7:114966036-114966981 | 0 | 0 |
| Olfr470       | chr7:114988300-114989245 | 0 | 0 |
| Olfr472       | chr7:115046232-115047165 | 0 | 0 |
| Olfr473       | chr7:115077035-115077968 | 0 | 0 |
| Olfr474       | chr7:115098156-115099089 | 0 | 0 |
| Olfr476       | chr7:115110912-115111845 | 0 | 0 |
| Olfr477       | chr7:115133880-115134813 | 0 | 0 |
| Olfr478       | chr7:115174910-115175855 | 0 | 0 |
| Olfr479       | chr7:115198497-115199481 | 0 | 0 |
| Olfr480       | chr7:115209281-115210310 | 0 | 0 |
| Olfr481       | chr7:115224309-115225248 | 0 | 0 |
| Olfr482       | chr7:115238110-115239082 | 0 | 0 |
| Olfr483       | chr7:115246824-115247772 | 0 | 0 |
| Olfr484       | chr7:115267809-115268775 | 0 | 0 |
| Olfr485       | chr7:115302431-115303385 | 0 | 0 |
| Olfr486       | chr7:115315311-115316256 | 0 | 0 |
| Olfr487       | chr7:115355096-115356041 | 0 | 0 |
| Olfr488       | chr7:115398705-115399650 | 0 | 0 |
| Olfr490       | chr7:115429693-115430638 | 0 | 0 |
| Olfr491       | chr7:115460409-115461342 | 0 | 0 |
| Olfr492       | chr7:115466243-115467188 | 0 | 0 |
| Olfr493       | chr7:115489548-115490493 | 0 | 0 |
| Olfr494       | chr7:115511005-115511950 | 0 | 0 |
| Olfr495       | chr7:115538635-115539628 | 0 | 0 |
| Olfr497       | chr7:115566086-115567031 | 0 | 0 |
| Olfr498       | chr7:115608839-115609832 | 0 | 0 |
| Olfr502       | chr7:115666517-115667462 | 0 | 0 |
| Olfr503       | chr7:115688040-115689012 | 0 | 0 |
| Olfr504       | chr7:115708350-115709307 | 0 | 0 |
| Olfr506       | chr7:115755822-115756767 | 0 | 0 |
| Olfr507       | chr7:115765327-115766278 | 0 | 0 |
| Olfr508       | chr7:115773507-115774440 | 0 | 0 |
| Olfr509       | chr7:115789122-115790088 | 0 | 0 |
| Olfr510       | chr7:115810931-115811876 | 0 | 0 |
| Olfr512       | chr7:115856868-115857849 | 0 | 0 |
| Olfr513       | chr7:115898371-115899301 | 0 | 0 |
| Olfr514       | chr7:115968578-115969511 | 0 | 0 |
| Olfr516       | chr7:115988577-115989522 | 0 | 0 |
| Olfr517       | chr7:116011721-116012666 | 0 | 0 |
| Olfr518       | chr7:116024116-116025118 | 0 | 0 |
| Olfr519       | chr7:116036974-116037919 | 0 | 0 |
| Ascl3         | chr7:116870978-116875246 | 0 | 0 |
| Scube2        | chr7:116942204-117009193 | 0 | 0 |
| 1600010M07Rik | chr7:117141890-117150160 | 0 | 0 |
| Mrv1          | chr7:118011780-118125609 | 0 | 0 |
| Gm16336       | chr7:118048498-118049365 | 0 | 0 |
| 4930543E12Rik | chr7:120243749-120285529 | 0 | 0 |

|               |                          |   |   |
|---------------|--------------------------|---|---|
| Pth           | chr7:120529089-120532087 | 0 | 0 |
| A730082K24Rik | chr7:122092163-122127481 | 0 | 0 |
| 1700003G18Rik | chr7:123225275-123236663 | 0 | 0 |
| Gpr139        | chr7:126287836-126327888 | 0 | 0 |
| Umod          | chr7:126606379-126622769 | 0 | 0 |
| Pdilt         | chr7:126630100-126666996 | 0 | 0 |
| Acsm5         | chr7:126669778-126686874 | 0 | 0 |
| Acsm2         | chr7:126697853-126744208 | 0 | 0 |
| Abca15        | chr7:127472197-127551201 | 0 | 0 |
| Abca16        | chr7:127565214-127688325 | 0 | 0 |
| Hs3st2        | chr7:128535809-128645282 | 0 | 0 |
| 2010110P09Rik | chr7:129363009-129366053 | 0 | 0 |
| Cacng3        | chr7:129815257-129912907 | 0 | 0 |
| Aqp8          | chr7:130605807-130611517 | 0 | 0 |
| 3100003L05Rik | chr7:131769183-131852449 | 0 | 0 |
| 4933440M02Rik | chr7:132475295-132493300 | 0 | 0 |
| 4930571K23Rik | chr7:132512374-132514527 | 0 | 0 |
| Il21r         | chr7:132746942-132777084 | 0 | 0 |
| Il27          | chr7:133732808-133738424 | 0 | 0 |
| 4930451I11Rik | chr7:133973987-133975010 | 0 | 0 |
| Zg16          | chr7:134193669-134195491 | 0 | 0 |
| Qprt          | chr7:134251283-134265543 | 0 | 0 |
| Mir684-1      | chr7:134542429-134542514 | 0 | 0 |
| Mir762        | chr7:134852000-134852076 | 0 | 0 |
| Itgad         | chr7:135317459-135349017 | 0 | 0 |
| 4931431B13Rik | chr7:135335563-135346842 | 0 | 0 |
| Mir3103       | chr7:135431882-135431949 | 0 | 0 |
| Gm4265        | chr7:137105678-137122183 | 0 | 0 |
| 4933402N03Rik | chr7:138281860-138289797 | 0 | 0 |
| 1700029B22Rik | chr7:138289952-138294092 | 0 | 0 |
| 5430419D17Rik | chr7:138317915-138394459 | 0 | 0 |
| Cuzd1         | chr7:138452067-138465806 | 0 | 0 |
| 1700007K09Rik | chr7:138469444-138473013 | 0 | 0 |
| Hmx2          | chr7:138697575-138700096 | 0 | 0 |
| Gpr26         | chr7:139158142-139177316 | 0 | 0 |
| Nkx1-2        | chr7:139787921-139791320 | 0 | 0 |
| Foxi2         | chr7:142602049-142605298 | 0 | 0 |
| Gm10578       | chr7:144426365-144434292 | 0 | 0 |
| Stk32c        | chr7:146289536-146399206 | 0 | 0 |
| Gpr123        | chr7:147020072-147063987 | 0 | 0 |
| Mir202        | chr7:147143587-147143659 | 0 | 0 |
| Sprn          | chr7:147336526-147340558 | 0 | 0 |
| Olfr522       | chr7:147347908-147348847 | 0 | 0 |
| Olfr523       | chr7:147362002-147362956 | 0 | 0 |
| Olfr524       | chr7:147387710-147388667 | 0 | 0 |
| Cd163l1       | chr7:147404165-147417044 | 0 | 0 |
| 5830411N06Rik | chr7:147433199-147485690 | 0 | 0 |
| Olfr525       | chr7:147508599-147509529 | 0 | 0 |
| Olfr527       | chr7:147521762-147522680 | 0 | 0 |
| Olfr60        | chr7:147530950-147531886 | 0 | 0 |
| Olfr530       | chr7:147558583-147559507 | 0 | 0 |
| Olfr531       | chr7:147586028-147586943 | 0 | 0 |

|               |                          |   |   |
|---------------|--------------------------|---|---|
| Olf532        | chr7:147604740-147605670 | 0 | 0 |
| Olf533        | chr7:147652101-147653064 | 0 | 0 |
| Olf535        | chr7:147678538-147679477 | 0 | 0 |
| Olf536        | chr7:147686751-147693217 | 0 | 0 |
| Olf538        | chr7:147760053-147760986 | 0 | 0 |
| Olf46         | chr7:147787238-147797023 | 0 | 0 |
| Olf61         | chr7:147823601-147824537 | 0 | 0 |
| Olf53         | chr7:147832350-147838818 | 0 | 0 |
| Olf539        | chr7:147853187-147854147 | 0 | 0 |
| Olf45         | chr7:147876805-147877741 | 0 | 0 |
| Olf541        | chr7:147890151-147891090 | 0 | 0 |
| C330022C24Rik | chr7:148023119-148031588 | 0 | 0 |
| Nlrp6         | chr7:148106800-148114439 | 0 | 0 |
| Ifitm6        | chr7:148201710-148202791 | 0 | 0 |
| Drd4          | chr7:148477904-148480900 | 0 | 0 |
| Mir3104       | chr7:149178083-149178146 | 0 | 0 |
| Krtap5-3      | chr7:149387268-149388920 | 0 | 0 |
| Krtap5-5      | chr7:149414699-149415876 | 0 | 0 |
| Krtap5-1      | chr7:149482281-149482974 | 0 | 0 |
| Tnni2         | chr7:149628372-149630310 | 0 | 0 |
| Gm14492       | chr7:149676984-149692676 | 0 | 0 |
| Nctc1         | chr7:149730513-149744503 | 0 | 0 |
| Mir675        | chr7:149762968-149763052 | 0 | 0 |
| Igf2as        | chr7:149845597-149856261 | 0 | 0 |
| Mir483        | chr7:149840828-149840901 | 0 | 0 |
| Ins2          | chr7:149864560-149865613 | 0 | 0 |
| Tnfrsf26      | chr7:150793589-150813750 | 0 | 0 |
| Mrgprg        | chr7:150949614-150952898 | 0 | 0 |
| Fgf4          | chr7:152047290-152051148 | 0 | 0 |
| Mrgprf        | chr7:152486813-152495462 | 0 | 0 |
| Mrgprd        | chr7:152500739-152509964 | 0 | 0 |
| 1700019B03Rik | chr8:3470861-3487178     | 0 | 0 |
| Retn          | chr8:3655769-3659818     | 0 | 0 |
| 1810033B17Rik | chr8:3665761-3668905     | 0 | 0 |
| Clec4g        | chr8:3716070-3720651     | 0 | 0 |
| Cd209a        | chr8:3743394-3748984     | 0 | 0 |
| Cd209e        | chr8:3847972-3854286     | 0 | 0 |
| Cd209d        | chr8:3871823-3878499     | 0 | 0 |
| Cd209b        | chr8:3917656-3926814     | 0 | 0 |
| Cd209f        | chr8:4102792-4105764     | 0 | 0 |
| Cd209g        | chr8:4134735-4137707     | 0 | 0 |
| Slc10a2       | chr8:5085622-5105232     | 0 | 0 |
| 4933430N04Rik | chr8:9125411-9132288     | 0 | 0 |
| Myo16         | chr8:10153922-10633950   | 0 | 0 |
| B930025P03Rik | chr8:10870421-10882454   | 0 | 0 |
| 3930402G23Rik | chr8:10924426-10928457   | 0 | 0 |
| Spaca7        | chr8:12573048-12600738   | 0 | 0 |
| Gm15348       | chr8:12706943-12719127   | 0 | 0 |
| Mir1968       | chr8:13189030-13189098   | 0 | 0 |
| Adprhl1       | chr8:13235661-13254162   | 0 | 0 |
| Atp4b         | chr8:13386208-13396778   | 0 | 0 |
| Fam70b        | chr8:13435458-13461451   | 0 | 0 |



|           |                        |   |   |
|-----------|------------------------|---|---|
| BB014433  | chr8:15041445-15046078 | 0 | 0 |
| Mir3106   | chr8:16168756-16168838 | 0 | 0 |
| Xkr5      | chr8:18932728-18950973 | 0 | 0 |
| Defb40    | chr8:18974939-18978116 | 0 | 0 |
| Defb37    | chr8:18986232-18991055 | 0 | 0 |
| Defb38    | chr8:19023463-19026529 | 0 | 0 |
| Defb39    | chr8:19052825-19064810 | 0 | 0 |
| Defb12    | chr8:19111930-19114833 | 0 | 0 |
| Defb34    | chr8:19123751-19126540 | 0 | 0 |
| Defb46    | chr8:19239915-19242143 | 0 | 0 |
| Defb5     | chr8:19247591-19250828 | 0 | 0 |
| Defa-ps13 | chr8:19300676-19304794 | 0 | 0 |
| Defb8     | chr8:19445769-19447606 | 0 | 0 |
| Defb7     | chr8:19495096-19497775 | 0 | 0 |
| Gm15056   | chr8:22040296-22041664 | 0 | 0 |
| Gm6040    | chr8:22056168-22061750 | 0 | 0 |
| AY761185  | chr8:22083372-22084427 | 0 | 0 |
| Defa21    | chr8:22165223-22166196 | 0 | 0 |
| Defa23    | chr8:22194718-22195695 | 0 | 0 |
| Defa-rs7  | chr8:22194718-22195696 | 0 | 0 |
| Defa25    | chr8:22224120-22224964 | 0 | 0 |
| Gm14851   | chr8:22234649-22235729 | 0 | 0 |
| Gm15284   | chr8:22274328-22275277 | 0 | 0 |
| Defa22    | chr8:22301955-22302928 | 0 | 0 |
| Defa23    | chr8:22331251-22332228 | 0 | 0 |
| Defa-rs7  | chr8:22331251-22332229 | 0 | 0 |
| Gm15293   | chr8:22341282-22342125 | 0 | 0 |
| Gm15292   | chr8:22389440-22390140 | 0 | 0 |
| Defa3     | chr8:22427087-22428056 | 0 | 0 |
| Defa5     | chr8:22437072-22438054 | 0 | 0 |
| Gm15299   | chr8:22455224-22456066 | 0 | 0 |
| Defa-rs1  | chr8:22465566-22466699 | 0 | 0 |
| Gm7849    | chr8:22565898-22566989 | 0 | 0 |
| Gm7861    | chr8:22566010-22566989 | 0 | 0 |
| Defa20    | chr8:22619727-22620709 | 0 | 0 |
| Gm15308   | chr8:22639501-22640484 | 0 | 0 |
| Gm6696    | chr8:22693498-22694339 | 0 | 0 |
| Gm7849    | chr8:22703846-22704937 | 0 | 0 |
| Gm7861    | chr8:22703958-22704937 | 0 | 0 |
| Defa26    | chr8:22728639-22729444 | 0 | 0 |
| Defa17    | chr8:22766238-22767208 | 0 | 0 |
| Defa4     | chr8:22776268-22776440 | 0 | 0 |
| Gm15315   | chr8:22776268-22777205 | 0 | 0 |
| Defa-ps1  | chr8:22805483-22806325 | 0 | 0 |
| AY761184  | chr8:22812995-22814119 | 0 | 0 |
| Defa24    | chr8:22844965-22845943 | 0 | 0 |
| Defa6     | chr8:22845008-22845849 | 0 | 0 |
| Defb50    | chr8:22934010-22941768 | 0 | 0 |
| Defb2     | chr8:22950397-22953953 | 0 | 0 |
| Defb10    | chr8:22969372-22972482 | 0 | 0 |
| Defb9     | chr8:22992184-22995906 | 0 | 0 |
| Defb11    | chr8:23015845-23016904 | 0 | 0 |

|               |                        |   |   |
|---------------|------------------------|---|---|
| Defb15        | chr8:23040284-23043182 | 0 | 0 |
| Defb35        | chr8:23048823-23051350 | 0 | 0 |
| Defb13        | chr8:23057233-23059094 | 0 | 0 |
| C86695        | chr8:23069185-23074775 | 0 | 0 |
| Ccdc70        | chr8:23081067-23084513 | 0 | 0 |
| Mir486        | chr8:24253026-24253154 | 0 | 0 |
| Mir3107       | chr8:24253044-24253134 | 0 | 0 |
| Nkx6-3        | chr8:24263742-24269420 | 0 | 0 |
| Ido2          | chr8:25642363-25686805 | 0 | 0 |
| Ido1          | chr8:25694612-25707481 | 0 | 0 |
| Adam18        | chr8:25712717-25785227 | 0 | 0 |
| Adam3         | chr8:25787705-25836297 | 0 | 0 |
| 2310008N11Rik | chr8:27925068-27934895 | 0 | 0 |
| Got11         | chr8:28307930-28313019 | 0 | 0 |
| Gm9731        | chr8:28406516-28407672 | 0 | 0 |
| Tex24         | chr8:28454865-28459660 | 0 | 0 |
| Chrna6        | chr8:28513683-28524416 | 0 | 0 |
| Poteg         | chr8:28558141-28605644 | 0 | 0 |
| Gm8096        | chr8:29193665-29195325 | 0 | 0 |
| Mir1186       | chr8:32213392-32213514 | 0 | 0 |
| 7420700N18Rik | chr8:32478220-32492910 | 0 | 0 |
| 5430403N17    | chr8:36927138-36946011 | 0 | 0 |
| Mir383        | chr8:39315186-39315256 | 0 | 0 |
| Gm6213        | chr8:40383333-40453622 | 0 | 0 |
| Adam24        | chr8:41760447-41767553 | 0 | 0 |
| Adam25        | chr8:41837561-41841530 | 0 | 0 |
| 4930529F22Rik | chr8:41878626-41882657 | 0 | 0 |
| Adam39        | chr8:41908362-41912215 | 0 | 0 |
| Fgl1          | chr8:42276787-42300510 | 0 | 0 |
| 2810404M03Rik | chr8:42912620-43131556 | 0 | 0 |
| Triml1        | chr8:44215160-44226840 | 0 | 0 |
| Triml2        | chr8:44268475-44279238 | 0 | 0 |
| Zfp42         | chr8:44380420-44392363 | 0 | 0 |
| Adam26b       | chr8:44605217-44613491 | 0 | 0 |
| Adam26a       | chr8:44653629-44662061 | 0 | 0 |
| Gm5346        | chr8:44710328-44712539 | 0 | 0 |
| Adam34        | chr8:44735662-44750914 | 0 | 0 |
| Gm5347        | chr8:44759011-44784845 | 0 | 0 |
| Gm6329        | chr8:46245847-46250499 | 0 | 0 |
| F11           | chr8:46326523-46347385 | 0 | 0 |
| Helt          | chr8:47377401-47380025 | 0 | 0 |
| Enpp6         | chr8:48072278-48180249 | 0 | 0 |
| Gm2516        | chr8:51453465-51501443 | 0 | 0 |
| Spata4        | chr8:55686133-55695451 | 0 | 0 |
| Adam29        | chr8:58349708-58385761 | 0 | 0 |
| Gira3         | chr8:58419621-58604149 | 0 | 0 |
| Hand2         | chr8:59799779-59803314 | 0 | 0 |
| Scrg1         | chr8:59934719-59956382 | 0 | 0 |
| Gm15881       | chr8:61178642-61179593 | 0 | 0 |
| BC030500      | chr8:61390551-61393095 | 0 | 0 |
| Aadat         | chr8:62984920-63024474 | 0 | 0 |
| Spock3        | chr8:65430028-65835893 | 0 | 0 |

|               |                          |   |   |
|---------------|--------------------------|---|---|
| Gm4975        | chr8:66403490-66430967   | 0 | 0 |
| Tll1          | chr8:66493566-66684790   | 0 | 0 |
| Mir710        | chr8:66993128-66993238   | 0 | 0 |
| Tktl2         | chr8:69035638-69037677   | 0 | 0 |
| Npy5r         | chr8:69203863-69211993   | 0 | 0 |
| Nat3          | chr8:70047752-70072526   | 0 | 0 |
| Hapln4        | chr8:72607427-72614761   | 0 | 0 |
| Il12rb1       | chr8:73332347-73345322   | 0 | 0 |
| Snora68       | chr8:73419657-73419755   | 0 | 0 |
| Mir1969       | chr8:73449423-73449517   | 0 | 0 |
| 1700026F02Rik | chr8:73530626-73550654   | 0 | 0 |
| Plvap         | chr8:74021651-74035668   | 0 | 0 |
| Olfr372       | chr8:74581558-74582574   | 0 | 0 |
| Olfr373       | chr8:74623660-74624605   | 0 | 0 |
| Olfr374       | chr8:74630938-74634408   | 0 | 0 |
| Mir28b        | chr8:75540410-75540490   | 0 | 0 |
| Isx           | chr8:77397072-77417405   | 0 | 0 |
| 1700007B14Rik | chr8:77972592-78508406   | 0 | 0 |
| Gm10649       | chr8:79272985-79424072   | 0 | 0 |
| 1700092C02Rik | chr8:80148070-80152855   | 0 | 0 |
| Ednra         | chr8:80186927-80248351   | 0 | 0 |
| Pou4f2        | chr8:80956907-80960551   | 0 | 0 |
| 1700011L22Rik | chr8:81734328-81772482   | 0 | 0 |
| Gypa          | chr8:83017943-83034684   | 0 | 0 |
| 4933434I20Rik | chr8:85872370-85903301   | 0 | 0 |
| Clgn          | chr8:85913789-85950728   | 0 | 0 |
| Olfr370       | chr8:86064991-86066087   | 0 | 0 |
| Mir1199       | chr8:86535413-86535532   | 0 | 0 |
| Palm3         | chr8:86545372-86554194   | 0 | 0 |
| Il27ra        | chr8:86554184-86566474   | 0 | 0 |
| Mir709        | chr8:86609997-86610085   | 0 | 0 |
| Mir181d       | chr8:86702614-86702686   | 0 | 0 |
| Mir181c       | chr8:86702771-86702860   | 0 | 0 |
| Mir23a        | chr8:86732416-86732491   | 0 | 0 |
| Mir27a        | chr8:86732570-86732657   | 0 | 0 |
| Mir3074-2     | chr8:86732723-86732806   | 0 | 0 |
| Olfr371       | chr8:87754395-87755334   | 0 | 0 |
| Gm10637       | chr8:89693645-89723749   | 0 | 0 |
| Cbln1         | chr8:89992751-89996491   | 0 | 0 |
| Gm2694        | chr8:89996710-90049453   | 0 | 0 |
| 4933402J07Rik | chr8:90087805-90113096   | 0 | 0 |
| Sall1         | chr8:91551142-91568061   | 0 | 0 |
| Irx6          | chr8:95198300-95203979   | 0 | 0 |
| Ces1a         | chr8:95544113-95572091   | 0 | 0 |
| Ces5a         | chr8:96038094-96059607   | 0 | 0 |
| Mt3           | chr8:96676506-96678048   | 0 | 0 |
| Mir138-2      | chr8:96848210-96848281   | 0 | 0 |
| Ccdc102a      | chr8:97426768-97441998   | 0 | 0 |
| Cngb1         | chr8:97762942-97830485   | 0 | 0 |
| Prss54        | chr8:98083191-98099097   | 0 | 0 |
| Mir1186b      | chr8:98487443-98487506   | 0 | 0 |
| Cdh8          | chr8:101552668-101940357 | 0 | 0 |

|               |                          |   |   |
|---------------|--------------------------|---|---|
| 4933400L20Rik | chr8:106127698-106204282 | 0 | 0 |
| Cdh5          | chr8:106625524-106668402 | 0 | 0 |
| Cdh16         | chr8:107125814-107148296 | 0 | 0 |
| Ces2a         | chr8:107257902-107265534 | 0 | 0 |
| 4932416K20Rik | chr8:107319136-107322692 | 0 | 0 |
| Ces2b         | chr8:107355543-107362552 | 0 | 0 |
| Ces3a         | chr8:107572498-107582314 | 0 | 0 |
| Ces3b         | chr8:107607654-107617491 | 0 | 0 |
| Mir328        | chr8:107832263-107832360 | 0 | 0 |
| Plekhg4       | chr8:107899280-107906762 | 0 | 0 |
| Dpep3         | chr8:108497419-108503319 | 0 | 0 |
| 1110028F18Rik | chr8:109111042-109118720 | 0 | 0 |
| Mir140        | chr8:110075143-110075213 | 0 | 0 |
| Mir3108       | chr8:111460759-111460838 | 0 | 0 |
| Pmfbp1        | chr8:112017926-112066542 | 0 | 0 |
| Snord71       | chr8:112363211-112363275 | 0 | 0 |
| Calb2         | chr8:112666437-112692106 | 0 | 0 |
| Snord111      | chr8:113362434-113362498 | 0 | 0 |
| Mir3473d      | chr8:113540349-113540430 | 0 | 0 |
| Clec18a       | chr8:113593396-113605608 | 0 | 0 |
| Chst5         | chr8:114413034-114434099 | 0 | 0 |
| Cntnap4       | chr8:115093942-115406607 | 0 | 0 |
| Gm10280       | chr8:115591161-115617233 | 0 | 0 |
| Adamts18      | chr8:116222036-116372739 | 0 | 0 |
| Clec3a        | chr8:116941933-116952033 | 0 | 0 |
| 4930563M20Rik | chr8:119305611-119325312 | 0 | 0 |
| Slc38a8       | chr8:122003502-122025598 | 0 | 0 |
| Adad2         | chr8:122136646-122140826 | 0 | 0 |
| Kcng4         | chr8:122147753-122159580 | 0 | 0 |
| 1110050K14Rik | chr8:123578781-123606932 | 0 | 0 |
| Foxf1a        | chr8:123608373-123610779 | 0 | 0 |
| Foxc2         | chr8:123640070-123642794 | 0 | 0 |
| Foxl1         | chr8:123651584-123654544 | 0 | 0 |
| 1700018B08Rik | chr8:124054683-124065854 | 0 | 0 |
| BC048644      | chr8:124431732-124442328 | 0 | 0 |
| Car5a         | chr8:124440043-124468812 | 0 | 0 |
| Snord68       | chr8:125626957-125627005 | 0 | 0 |
| Cpne7         | chr8:125641273-125659085 | 0 | 0 |
| Dpep1         | chr8:125710134-125725713 | 0 | 0 |
| Mir1967       | chr8:126546540-126546622 | 0 | 0 |
| Mir1903       | chr8:130883140-130883220 | 0 | 0 |
| Ccdc7         | chr8:131503918-131589392 | 0 | 0 |
| 1700008F21Rik | chr8:131591033-131707632 | 0 | 0 |
| Mir101c       | chr9:3038668-3038743     | 0 | 0 |
| Gria4         | chr9:4417892-4796234     | 0 | 0 |
| Ddi1          | chr9:6265027-6266547     | 0 | 0 |
| Mmp1b         | chr9:7367669-7388026     | 0 | 0 |
| Mmp3          | chr9:7445821-7455974     | 0 | 0 |
| Mmp1a         | chr9:7464140-7476869     | 0 | 0 |
| Mmp10         | chr9:7502359-7510240     | 0 | 0 |
| Mmp8          | chr9:7558428-7568486     | 0 | 0 |
| Mmp27         | chr9:7571457-7581393     | 0 | 0 |

|               |                        |   |   |
|---------------|------------------------|---|---|
| Mmp20         | chr9:7628230-7674968   | 0 | 0 |
| Mmp7          | chr9:7692110-7699416   | 0 | 0 |
| 1700128F08Rik | chr9:8221888-8241987   | 0 | 0 |
| Mir1899       | chr9:8246785-8246881   | 0 | 0 |
| Cntn5         | chr9:9660890-10904775  | 0 | 0 |
| 4930568E12Rik | chr9:13091266-13105855 | 0 | 0 |
| 1700012B09Rik | chr9:14562637-14575474 | 0 | 0 |
| Folr4         | chr9:14690257-14708395 | 0 | 0 |
| Scarna9       | chr9:15130732-15130774 | 0 | 0 |
| 4930540M03Rik | chr9:15424300-15445664 | 0 | 0 |
| Mtnr1b        | chr9:15667057-15679000 | 0 | 0 |
| Ubtfl1        | chr9:18208861-18215946 | 0 | 0 |
| Mbd3l2        | chr9:18235058-18250760 | 0 | 0 |
| Mbd3l1        | chr9:18282838-18289736 | 0 | 0 |
| Olfr24        | chr9:18559135-18560077 | 0 | 0 |
| Olfr828       | chr9:18619797-18620736 | 0 | 0 |
| Olfr829       | chr9:18661070-18662036 | 0 | 0 |
| Olfr830       | chr9:18679772-18680720 | 0 | 0 |
| Olfr832       | chr9:18749093-18750032 | 0 | 0 |
| Olfr835       | chr9:18839568-18840504 | 0 | 0 |
| Olfr836       | chr9:18925400-18926355 | 0 | 0 |
| Olfr837       | chr9:18941371-18942411 | 0 | 0 |
| Olfr843       | chr9:19052800-19053907 | 0 | 0 |
| Olfr845       | chr9:19142902-19143844 | 0 | 0 |
| Olfr846       | chr9:19164858-19165800 | 0 | 0 |
| Olfr847       | chr9:19179384-19180323 | 0 | 0 |
| Olfr849       | chr9:19245358-19246297 | 0 | 0 |
| Olfr850       | chr9:19281744-19282692 | 0 | 0 |
| Olfr851       | chr9:19301193-19302132 | 0 | 0 |
| Olfr853       | chr9:19341454-19342372 | 0 | 0 |
| Olfr854       | chr9:19370878-19371826 | 0 | 0 |
| Olfr855       | chr9:19388954-19389946 | 0 | 0 |
| Olfr857       | chr9:19517272-19518202 | 0 | 0 |
| Olfr58        | chr9:19584726-19588508 | 0 | 0 |
| Olfr859       | chr9:19612763-19613693 | 0 | 0 |
| Olfr860       | chr9:19650066-19654191 | 0 | 0 |
| Olfr862       | chr9:19687826-19688747 | 0 | 0 |
| Olfr77        | chr9:19721672-19726954 | 0 | 0 |
| Olfr866       | chr9:19831402-19832479 | 0 | 0 |
| Olfr867       | chr9:19858909-19859905 | 0 | 0 |
| Olfr868       | chr9:19903069-19906134 | 0 | 0 |
| Olfr869       | chr9:19933563-19942533 | 0 | 0 |
| Olfr870       | chr9:19975077-19976013 | 0 | 0 |
| Olfr871       | chr9:20016650-20017797 | 0 | 0 |
| Olfr872       | chr9:20041605-20065357 | 0 | 0 |
| Olfr39        | chr9:20086794-20091092 | 0 | 0 |
| Olfr873       | chr9:20104654-20105614 | 0 | 0 |
| Olfr18        | chr9:20118335-20140538 | 0 | 0 |
| Col5a3        | chr9:20574493-20619478 | 0 | 0 |
| Rdh8          | chr9:20622947-20630607 | 0 | 0 |
| Mir1900       | chr9:20836694-20836772 | 0 | 0 |
| Mir199a-1     | chr9:21300938-21301008 | 0 | 0 |

|               |                        |   |   |
|---------------|------------------------|---|---|
| Gm6607        | chr9:22134585-22135134 | 0 | 0 |
| Bmper         | chr9:23027519-23289646 | 0 | 0 |
| Npsr1         | chr9:23902461-24120842 | 0 | 0 |
| Dpy1912       | chr9:24361491-24500737 | 0 | 0 |
| Cypt4         | chr9:24429628-24430272 | 0 | 0 |
| Cypt9         | chr9:24429647-24430181 | 0 | 0 |
| Tbx20         | chr9:24525255-24578747 | 0 | 0 |
| Glb1l3        | chr9:26625537-26668408 | 0 | 0 |
| Spata19       | chr9:27204405-27209295 | 0 | 0 |
| Mir3471-1     | chr9:30942991-31066970 | 0 | 0 |
| Gm7244        | chr9:31078985-31082970 | 0 | 0 |
| 7630403G23Rik | chr9:33849955-33866604 | 0 | 0 |
| 4933422A05Rik | chr9:35088689-35093008 | 0 | 0 |
| Gm5916        | chr9:35927518-35936364 | 0 | 0 |
| Gm7257        | chr9:36239468-36242523 | 0 | 0 |
| Gm9513        | chr9:36283222-36284765 | 0 | 0 |
| Gm5615        | chr9:36339987-36349548 | 0 | 0 |
| Gm17689       | chr9:36388862-36390220 | 0 | 0 |
| A630095E13Rik | chr9:36443338-36446187 | 0 | 0 |
| 1700027I24Rik | chr9:36476440-36500774 | 0 | 0 |
| Acrv1         | chr9:36500804-36506422 | 0 | 0 |
| Robo4         | chr9:37209630-37221607 | 0 | 0 |
| Robo3         | chr9:37223629-37240760 | 0 | 0 |
| Olfr160       | chr9:37518932-37519865 | 0 | 0 |
| Olfr151       | chr9:37537561-37538646 | 0 | 0 |
| Olfr874       | chr9:37553720-37554653 | 0 | 0 |
| Olfr875       | chr9:37580221-37581225 | 0 | 0 |
| Olfr876       | chr9:37611473-37612521 | 0 | 0 |
| Olfr877       | chr9:37662404-37663340 | 0 | 0 |
| Olfr145       | chr9:37704990-37705923 | 0 | 0 |
| Olfr878       | chr9:37726132-37727197 | 0 | 0 |
| Olfr884       | chr9:37854808-37855738 | 0 | 0 |
| Olfr885       | chr9:37868906-37869836 | 0 | 0 |
| Olfr887       | chr9:37892422-37893352 | 0 | 0 |
| Olfr888       | chr9:37916272-37917217 | 0 | 0 |
| Olfr889       | chr9:37923382-37924312 | 0 | 0 |
| Olfr890       | chr9:37950721-37951666 | 0 | 0 |
| Olfr891       | chr9:37987455-37988406 | 0 | 0 |
| Olfr893       | chr9:38016636-38017578 | 0 | 0 |
| Olfr894       | chr9:38026402-38027351 | 0 | 0 |
| Olfr143       | chr9:38061003-38061945 | 0 | 0 |
| Olfr895       | chr9:38076099-38077050 | 0 | 0 |
| Olfr25        | chr9:38137076-38138144 | 0 | 0 |
| Olfr898       | chr9:38156669-38157620 | 0 | 0 |
| Olfr899       | chr9:38175132-38176128 | 0 | 0 |
| Olfr900       | chr9:38185467-38186418 | 0 | 0 |
| Olfr147       | chr9:38209295-38211414 | 0 | 0 |
| Olfr902       | chr9:38256376-38257432 | 0 | 0 |
| Olfr904       | chr9:38271627-38272560 | 0 | 0 |
| Olfr905       | chr9:38280333-38281266 | 0 | 0 |
| Olfr906       | chr9:38295615-38296551 | 0 | 0 |
| Olfr907       | chr9:38306255-38307188 | 0 | 0 |

|              |                        |   |   |
|--------------|------------------------|---|---|
| Olfr908      | chr9:38323618-38324550 | 0 | 0 |
| Olfr911-ps1  | chr9:38331314-38332254 | 0 | 0 |
| Olfr910      | chr9:38345466-38347414 | 0 | 0 |
| Olfr912      | chr9:38387828-38389796 | 0 | 0 |
| Olfr913      | chr9:38400387-38402746 | 0 | 0 |
| Olfr914      | chr9:38414051-38415002 | 0 | 0 |
| Olfr915      | chr9:38454174-38455107 | 0 | 0 |
| Olfr916      | chr9:38465042-38465975 | 0 | 0 |
| Olfr917      | chr9:38472497-38473427 | 0 | 0 |
| Olfr918      | chr9:38480088-38481066 | 0 | 0 |
| Olfr919      | chr9:38505013-38505961 | 0 | 0 |
| Olfr921      | chr9:38580672-38583939 | 0 | 0 |
| Olfr922      | chr9:38622992-38624124 | 0 | 0 |
| Olfr923      | chr9:38635199-38636267 | 0 | 0 |
| Olfr924      | chr9:38655700-38656627 | 0 | 0 |
| Olfr26       | chr9:38662644-38663575 | 0 | 0 |
| Olfr926      | chr9:38684762-38685689 | 0 | 0 |
| Olfr930      | chr9:38737757-38738684 | 0 | 0 |
| Olfr933      | chr9:38783262-38784189 | 0 | 0 |
| Olfr934      | chr9:38789694-38790627 | 0 | 0 |
| Olfr935      | chr9:38802091-38803018 | 0 | 0 |
| Olfr146      | chr9:38826203-38827124 | 0 | 0 |
| Olfr936      | chr9:38854198-38855134 | 0 | 0 |
| Olfr937      | chr9:38867313-38868249 | 0 | 0 |
| Olfr938      | chr9:38885380-38886328 | 0 | 0 |
| Olfr27       | chr9:38935751-38952655 | 0 | 0 |
| Olfr242      | chr9:38951686-38952603 | 0 | 0 |
| Olfr943      | chr9:38973894-38992709 | 0 | 0 |
| Olfr944      | chr9:39024943-39025879 | 0 | 0 |
| Olfr1537-ps1 | chr9:39045071-39046016 | 0 | 0 |
| Olfr945      | chr9:39065304-39066264 | 0 | 0 |
| Olfr947-ps1  | chr9:39095510-39107066 | 0 | 0 |
| Olfr948      | chr9:39126231-39127197 | 0 | 0 |
| Olfr951      | chr9:39201377-39202322 | 0 | 0 |
| Olfr952      | chr9:39233709-39234654 | 0 | 0 |
| Olfr954      | chr9:39269017-39269962 | 0 | 0 |
| Olfr955      | chr9:39277364-39278309 | 0 | 0 |
| Olfr44       | chr9:39291788-39301573 | 0 | 0 |
| Olfr957      | chr9:39318367-39319303 | 0 | 0 |
| Olfr958      | chr9:39357515-39358454 | 0 | 0 |
| Olfr959      | chr9:39379906-39380842 | 0 | 0 |
| Olfr960      | chr9:39430709-39431660 | 0 | 0 |
| Olfr961      | chr9:39454312-39455257 | 0 | 0 |
| Olfr963      | chr9:39476643-39477579 | 0 | 0 |
| Olfr149      | chr9:39509416-39510352 | 0 | 0 |
| Olfr965      | chr9:39526813-39527752 | 0 | 0 |
| Olfr150      | chr9:39544401-39545340 | 0 | 0 |
| Olfr967      | chr9:39557972-39558905 | 0 | 0 |
| Olfr968      | chr9:39579356-39580383 | 0 | 0 |
| Olfr969      | chr9:39602961-39603897 | 0 | 0 |
| Olfr970      | chr9:39627225-39628161 | 0 | 0 |
| Olfr971      | chr9:39647020-39647944 | 0 | 0 |

|               |                        |   |   |
|---------------|------------------------|---|---|
| Olfr972       | chr9:39680861-39681806 | 0 | 0 |
| Olfr229       | chr9:39717389-39718313 | 0 | 0 |
| Olfr974       | chr9:39749846-39750779 | 0 | 0 |
| Olfr975       | chr9:39757421-39758354 | 0 | 0 |
| Olfr976       | chr9:39761841-39764654 | 0 | 0 |
| Olfr978       | chr9:39801396-39802332 | 0 | 0 |
| Olfr979       | chr9:39807790-39808835 | 0 | 0 |
| Olfr980       | chr9:39813578-39814614 | 0 | 0 |
| Olfr981       | chr9:39829979-39830912 | 0 | 0 |
| Olfr982       | chr9:39881881-39882847 | 0 | 0 |
| Olfr983       | chr9:39899601-39901143 | 0 | 0 |
| Olfr984       | chr9:39908128-39909073 | 0 | 0 |
| Olfr985       | chr9:39934508-39935624 | 0 | 0 |
| Tmem225       | chr9:39955706-39958463 | 0 | 0 |
| Bsx           | chr9:40682209-40686055 | 0 | 0 |
| Crtam         | chr9:40780880-40812669 | 0 | 0 |
| Mir100        | chr9:41339507-41339587 | 0 | 0 |
| Mirlet7a-2    | chr9:41344798-41344894 | 0 | 0 |
| Mir125b-1     | chr9:41390008-41390085 | 0 | 0 |
| 4930546K05Rik | chr9:41990320-42017314 | 0 | 0 |
| D630033O11Rik | chr9:43067961-43088158 | 0 | 0 |
| Pdzd3         | chr9:44055394-44059547 | 0 | 0 |
| Treh          | chr9:44481320-44494387 | 0 | 0 |
| Cd3g          | chr9:44777654-44788514 | 0 | 0 |
| Cd3e          | chr9:44806825-44817673 | 0 | 0 |
| Scn2b         | chr9:44925958-44938153 | 0 | 0 |
| Scn4b         | chr9:44947124-44962144 | 0 | 0 |
| Il10ra        | chr9:45061921-45077229 | 0 | 0 |
| Apoc3         | chr9:46041133-46043380 | 0 | 0 |
| Apoa4         | chr9:46048926-46051541 | 0 | 0 |
| Apoa5         | chr9:46076690-46080002 | 0 | 0 |
| 2900052N01Rik | chr9:46721685-46735449 | 0 | 0 |
| Gm4791        | chr9:46806823-46811943 | 0 | 0 |
| Gm8884        | chr9:48262444-48262828 | 0 | 0 |
| Nnmt          | chr9:48399994-48413182 | 0 | 0 |
| Htr3b         | chr9:48743112-48773095 | 0 | 0 |
| Drd2          | chr9:49148766-49215319 | 0 | 0 |
| Mir34c        | chr9:50911138-50911215 | 0 | 0 |
| Mir34b        | chr9:50911666-50911750 | 0 | 0 |
| 4933407I05Rik | chr9:51722533-51735108 | 0 | 0 |
| Rab39         | chr9:53492214-53514337 | 0 | 0 |
| Sln           | chr9:53698057-53701656 | 0 | 0 |
| Cyp19a1       | chr9:54013743-54041249 | 0 | 0 |
| 1700104A03Rik | chr9:54116386-54149377 | 0 | 0 |
| Chrna5        | chr9:54828686-54855586 | 0 | 0 |
| Odf3l1        | chr9:56696465-56699770 | 0 | 0 |
| 1700041C23Rik | chr9:57023081-57033915 | 0 | 0 |
| 4930430J02Rik | chr9:57238876-57248171 | 0 | 0 |
| Cplx3         | chr9:57447798-57454088 | 0 | 0 |
| Lman1l        | chr9:57454839-57468581 | 0 | 0 |
| 1600029O15Rik | chr9:58050703-58056615 | 0 | 0 |
| Loxl1         | chr9:58135529-58161019 | 0 | 0 |





|               |                          |   |   |
|---------------|--------------------------|---|---|
| 7420426K07Rik | chr9:98803537-98805041   | 0 | 0 |
| Foxl2os       | chr9:98849573-98855729   | 0 | 0 |
| Foxl2         | chr9:98856025-98858545   | 0 | 0 |
| Gm6432        | chr9:99129794-99137658   | 0 | 0 |
| A4gnt         | chr9:99512920-99522786   | 0 | 0 |
| Cldn18        | chr9:99591215-99617686   | 0 | 0 |
| 4930519F24Rik | chr9:99922718-99935089   | 0 | 0 |
| Gm5627        | chr9:102641977-102659015 | 0 | 0 |
| Trf           | chr9:103111205-103132616 | 0 | 0 |
| 1300017J02Rik | chr9:103152859-103190627 | 0 | 0 |
| Mir2136       | chr9:104328442-104328517 | 0 | 0 |
| Cpne4         | chr9:104472117-104936874 | 0 | 0 |
| 1700080E11Rik | chr9:105045673-105047412 | 0 | 0 |
| Mir135a-1     | chr9:106056454-106056544 | 0 | 0 |
| Mirlet7g      | chr9:106081170-106081258 | 0 | 0 |
| lqcf1         | chr9:106402297-106404581 | 0 | 0 |
| lqcf5         | chr9:106416903-106418334 | 0 | 0 |
| lqcf3         | chr9:106445719-106463956 | 0 | 0 |
| lqcf4         | chr9:106470649-106473298 | 0 | 0 |
| lqcf6         | chr9:106528912-106529943 | 0 | 0 |
| 4921517D21Rik | chr9:107830799-107834792 | 0 | 0 |
| BC048562      | chr9:108338812-108348414 | 0 | 0 |
| Mir191        | chr9:108470649-108470723 | 0 | 0 |
| Mir425        | chr9:108471107-108471192 | 0 | 0 |
| Tmem89        | chr9:108816949-108817894 | 0 | 0 |
| Mir711        | chr9:108871966-108872048 | 0 | 0 |
| Fbxw13        | chr9:109081740-109098489 | 0 | 0 |
| Fbxw20        | chr9:109119945-109137238 | 0 | 0 |
| Fbxw14        | chr9:109173638-109190190 | 0 | 0 |
| Fbxw28        | chr9:109225399-109242173 | 0 | 0 |
| Fbxw22        | chr9:109280922-109306808 | 0 | 0 |
| Fbxw16        | chr9:109334831-109351654 | 0 | 0 |
| Fbxw19        | chr9:109381088-109398368 | 0 | 0 |
| Fbxw15        | chr9:109455115-109470776 | 0 | 0 |
| Fbxw24        | chr9:109503629-109528573 | 0 | 0 |
| Fbxw18        | chr9:109579247-109605214 | 0 | 0 |
| Fbxw26        | chr9:109620079-109648603 | 0 | 0 |
| Camp          | chr9:109749890-109751970 | 0 | 0 |
| Ngp           | chr9:110322311-110325516 | 0 | 0 |
| Myl3          | chr9:110666184-110672298 | 0 | 0 |
| Prss42        | chr9:110700688-110706248 | 0 | 0 |
| Prss44        | chr9:110716497-110720503 | 0 | 0 |
| Prss50        | chr9:110760470-110767132 | 0 | 0 |
| Gm590         | chr9:110817242-110819365 | 0 | 0 |
| Tdgf1         | chr9:110842111-110848662 | 0 | 0 |
| 2900079G21Rik | chr9:112136780-112251429 | 0 | 0 |
| Mir128-2      | chr9:112021139-112021215 | 0 | 0 |
| AU023762      | chr9:113405863-113496270 | 0 | 0 |
| Susd5         | chr9:113966471-114007851 | 0 | 0 |
| Bcl2a1c       | chr9:114239252-114239696 | 0 | 0 |
| 4930525D18Rik | chr9:114250228-114273745 | 0 | 0 |
| 4930428G15Rik | chr9:115245278-115251042 | 0 | 0 |

|               |                          |   |   |
|---------------|--------------------------|---|---|
| 4933432G23Rik | chr9:118338956-118346166 | 0 | 0 |
| Eomes         | chr9:118387306-118395250 | 0 | 0 |
| Mir26a-1      | chr9:118940913-118941003 | 0 | 0 |
| Slc22a14      | chr9:119078573-119099511 | 0 | 0 |
| Scn10a        | chr9:119517573-119628150 | 0 | 0 |
| Scn11a        | chr9:119662882-119734574 | 0 | 0 |
| Ccr8          | chr9:120001250-120004024 | 0 | 0 |
| Mobp          | chr9:120058859-120085209 | 0 | 0 |
| 1700020M21Rik | chr9:120822891-120824368 | 0 | 0 |
| 4930593C16Rik | chr9:120833572-120839920 | 0 | 0 |
| Lyzl4         | chr9:121486960-121550684 | 0 | 0 |
| 4930596M17Rik | chr9:121496137-121523373 | 0 | 0 |
| Hhatl         | chr9:121693133-121701625 | 0 | 0 |
| Ccbp2         | chr9:121807581-121820182 | 0 | 0 |
| Cyp8b1        | chr9:121823473-121825423 | 0 | 0 |
| 1700048O20Rik | chr9:121846392-121856134 | 0 | 0 |
| Fam198a       | chr9:121860105-121889326 | 0 | 0 |
| Mir138-1      | chr9:122591993-122592092 | 0 | 0 |
| Gm9524        | chr9:122656463-122711192 | 0 | 0 |
| Clec3b        | chr9:123060063-123066550 | 0 | 0 |
| Ccr1l1        | chr9:123891781-123893241 | 0 | 0 |
| Ccr3          | chr9:123936702-123946421 | 0 | 0 |
| Ccr2          | chr9:124016921-124023879 | 0 | 0 |
| Gm14346       | chrX:3241669-3243629     | 0 | 0 |
| Gm3706        | chrX:3241674-3243629     | 0 | 0 |
| Gm14351       | chrX:3241678-3243629     | 0 | 0 |
| Gm3750        | chrX:3242047-3243544     | 0 | 0 |
| Gm14351       | chrX:3410667-3412618     | 0 | 0 |
| Gm14345       | chrX:3410667-3412627     | 0 | 0 |
| Gm14346       | chrX:3461360-3463320     | 0 | 0 |
| Gm14351       | chrX:3461369-3463320     | 0 | 0 |
| Gm14354       | chrX:3546313-3547091     | 0 | 0 |
| Gm14346       | chrX:3665477-3667437     | 0 | 0 |
| Gm14351       | chrX:3665486-3667437     | 0 | 0 |
| Gm3706        | chrX:3748108-3750057     | 0 | 0 |
| Gm3750        | chrX:3748193-3749684     | 0 | 0 |
| Gm14347       | chrX:3907010-3908970     | 0 | 0 |
| Gm10922       | chrX:3993613-3995573     | 0 | 0 |
| Gm10921       | chrX:4074963-4076923     | 0 | 0 |
| Gm5925        | chrX:4219982-4221937     | 0 | 0 |
| Gm3706        | chrX:4446441-4448390     | 0 | 0 |
| Gm3750        | chrX:4446526-4448017     | 0 | 0 |
| Gm3763        | chrX:4598165-4600108     | 0 | 0 |
| Mycs          | chrX:5044021-5046383     | 0 | 0 |
| Gm14374       | chrX:5246184-5248144     | 0 | 0 |
| AU022751      | chrX:5658335-5660538     | 0 | 0 |
| Bmp15         | chrX:5891223-5897841     | 0 | 0 |
| 5430428K19Rik | chrX:6029493-6151781     | 0 | 0 |
| Ccnb3         | chrX:6556777-6618745     | 0 | 0 |
| Akap4         | chrX:6644644-6655732     | 0 | 0 |
| Mir500        | chrX:6814808-6814900     | 0 | 0 |
| Mir501        | chrX:6818368-6818477     | 0 | 0 |

|               |                        |   |   |
|---------------|------------------------|---|---|
| Mir362        | chrX:6819108-6819172   | 0 | 0 |
| Mir188        | chrX:6825114-6825182   | 0 | 0 |
| Mir532        | chrX:6825527-6825623   | 0 | 0 |
| Mir684-1      | chrX:7330214-7330299   | 0 | 0 |
| Eras          | chrX:7501401-7505733   | 0 | 0 |
| Gata1         | chrX:7536385-7544941   | 0 | 0 |
| Glod5         | chrX:7581326-7595618   | 0 | 0 |
| Was           | chrX:7658591-7667617   | 0 | 0 |
| Slc38a5       | chrX:7848517-7857302   | 0 | 0 |
| Gm14459       | chrX:8091177-8102080   | 0 | 0 |
| Ssx9          | chrX:8325555-8331713   | 0 | 0 |
| Gm5634        | chrX:8539259-8540101   | 0 | 0 |
| Gm14511       | chrX:8552837-8553685   | 0 | 0 |
| Gm14458       | chrX:8563025-8563881   | 0 | 0 |
| Fthl17        | chrX:8610611-8611459   | 0 | 0 |
| Gm5635        | chrX:8640215-8640948   | 0 | 0 |
| Gm5132        | chrX:9149085-9149517   | 0 | 0 |
| 1700054O13Rik | chrX:9424072-9424626   | 0 | 0 |
| 4930557A04Rik | chrX:9426828-9427378   | 0 | 0 |
| Srpx          | chrX:9615102-9694787   | 0 | 0 |
| Otc           | chrX:9829484-9898150   | 0 | 0 |
| Gm4906        | chrX:10904947-10905277 | 0 | 0 |
| Gm14635       | chrX:11916904-11932122 | 0 | 0 |
| Gm5382        | chrX:13788273-13788783 | 0 | 0 |
| Ppp1r2-ps9    | chrX:14687711-14688615 | 0 | 0 |
| Cypt1         | chrX:16099997-16100815 | 0 | 0 |
| Cypt7         | chrX:16100006-16100741 | 0 | 0 |
| Cypt8         | chrX:16100006-16100741 | 0 | 0 |
| Maob          | chrX:16286406-16394492 | 0 | 0 |
| Dusp21        | chrX:17722995-17723818 | 0 | 0 |
| 4930578C19Rik | chrX:17995552-18038400 | 0 | 0 |
| Mir221        | chrX:18723419-18723514 | 0 | 0 |
| Mir222        | chrX:18724018-18724097 | 0 | 0 |
| Rgn           | chrX:20126943-20139213 | 0 | 0 |
| 4930453H23Rik | chrX:20783705-20798791 | 0 | 0 |
| Agtr2         | chrX:21061751-21065957 | 0 | 0 |
| Ppp1r2-ps7    | chrX:22038721-22040669 | 0 | 0 |
| Gm5934        | chrX:24051433-24077886 | 0 | 0 |
| Gm4297        | chrX:24129375-24152021 | 0 | 0 |
| Gm5935        | chrX:24330287-24352290 | 0 | 0 |
| Gm10147       | chrX:24475577-24498454 | 0 | 0 |
| Gm10230       | chrX:24475577-24498486 | 0 | 0 |
| Gm10486       | chrX:24475577-24498514 | 0 | 0 |
| Gm10058       | chrX:24475581-24498483 | 0 | 0 |
| Gm10096       | chrX:24475594-24498514 | 0 | 0 |
| Gm5169        | chrX:24704608-24728581 | 0 | 0 |
| Gm1993        | chrX:24975421-24997578 | 0 | 0 |
| Gm5168        | chrX:25455339-25478167 | 0 | 0 |
| Gm2012        | chrX:25628008-26362795 | 0 | 0 |
| Slx           | chrX:25949782-25972691 | 0 | 0 |
| Gm6121        | chrX:26339869-26362795 | 0 | 0 |
| Gm2030        | chrX:25714102-25737170 | 0 | 0 |



|               |                        |   |   |
|---------------|------------------------|---|---|
| Gm10921       | chrX:30245481-30247441 | 0 | 0 |
| Gm14345       | chrX:30291071-30293031 | 0 | 0 |
| Gm14351       | chrX:30291080-30293031 | 0 | 0 |
| Gm2799        | chrX:30598310-30600259 | 0 | 0 |
| Gm2799        | chrX:30732633-30734583 | 0 | 0 |
| Gmcl1l        | chrX:30732633-30734588 | 0 | 0 |
| Gm2825        | chrX:30977792-30979742 | 0 | 0 |
| Gm2837        | chrX:31060181-31060959 | 0 | 0 |
| Gm2863        | chrX:31349046-31350997 | 0 | 0 |
| Gm2913        | chrX:31750506-31752466 | 0 | 0 |
| Gm14351       | chrX:31750515-31752466 | 0 | 0 |
| Gm2933        | chrX:31750733-31752434 | 0 | 0 |
| Gm2933        | chrX:31875768-31877469 | 0 | 0 |
| Gm4836        | chrX:32607378-32630294 | 0 | 0 |
| Gm10486       | chrX:32607378-32630311 | 0 | 0 |
| Gm14819       | chrX:32607406-32630311 | 0 | 0 |
| Gm10488       | chrX:32607409-32630292 | 0 | 0 |
| Gm10058       | chrX:32607409-32630307 | 0 | 0 |
| Gm10147       | chrX:32607438-32630311 | 0 | 0 |
| Gm10487       | chrX:32944181-32967071 | 0 | 0 |
| Gm10486       | chrX:32944181-32967088 | 0 | 0 |
| Gm10230       | chrX:32944209-32967088 | 0 | 0 |
| Gm10488       | chrX:32944212-32967069 | 0 | 0 |
| Gm10058       | chrX:32944212-32967084 | 0 | 0 |
| Gm10147       | chrX:32944241-32967088 | 0 | 0 |
| Gm6268        | chrX:33943471-33944649 | 0 | 0 |
| Gm15008       | chrX:34450828-34451980 | 0 | 0 |
| Sowahd        | chrX:34588839-34590413 | 0 | 0 |
| Gm9           | chrX:34748496-34751036 | 0 | 0 |
| Rhox1         | chrX:34753799-34762253 | 0 | 0 |
| Rhox2a        | chrX:34784986-34789685 | 0 | 0 |
| Rhox2e        | chrX:34784986-34831309 | 0 | 0 |
| Rhox2b        | chrX:34826611-34831313 | 0 | 0 |
| Rhox3a        | chrX:34789913-34798973 | 0 | 0 |
| Rhox3e        | chrX:34794872-34798793 | 0 | 0 |
| Rhox2c        | chrX:34868165-34872882 | 0 | 0 |
| Rhox3c        | chrX:34884374-34888286 | 0 | 0 |
| Rhox2d        | chrX:34907916-34912222 | 0 | 0 |
| Rhox3-ps      | chrX:34918350-34922313 | 0 | 0 |
| Rhox2e        | chrX:34944974-34956316 | 0 | 0 |
| Rhox3e        | chrX:34961481-34965404 | 0 | 0 |
| Rhox2f        | chrX:34985927-34990666 | 0 | 0 |
| Rhox3f        | chrX:34995858-35000003 | 0 | 0 |
| Rhox3g-ps     | chrX:35037938-35042776 | 0 | 0 |
| Rhox2g        | chrX:35053618-35057977 | 0 | 0 |
| Rhox3h        | chrX:35072194-35083271 | 0 | 0 |
| Rhox2h        | chrX:35083503-35087784 | 0 | 0 |
| Rhox6         | chrX:35180231-35183034 | 0 | 0 |
| Rhox7         | chrX:35184862-35194348 | 0 | 0 |
| Rhox8         | chrX:35227952-35232121 | 0 | 0 |
| Rhox9         | chrX:35252273-35254947 | 0 | 0 |
| 4930525M21Rik | chrX:35367084-35371992 | 0 | 0 |

|               |                        |   |   |
|---------------|------------------------|---|---|
| 4930430D24Rik | chrX:35391375-35396291 | 0 | 0 |
| Rhox10        | chrX:35419651-35424865 | 0 | 0 |
| Rhox11        | chrX:35429774-35438316 | 0 | 0 |
| Rhox12        | chrX:35457238-35464084 | 0 | 0 |
| Rhox13        | chrX:35474016-35483143 | 0 | 0 |
| Mir3110       | chrX:35563617-35563697 | 0 | 0 |
| 6030498E09Rik | chrX:36125956-36315865 | 0 | 0 |
| Cypt15        | chrX:36699442-36700138 | 0 | 0 |
| Cypt14        | chrX:37216095-37216781 | 0 | 0 |
| Sh2d1a        | chrX:39855784-39875252 | 0 | 0 |
| Gm362         | chrX:40944165-40946707 | 0 | 0 |
| Dcaf12l2      | chrX:41718633-41721514 | 0 | 0 |
| 1110059M19Rik | chrX:42444080-42445967 | 0 | 0 |
| 4930515L19Rik | chrX:43620735-43682088 | 0 | 0 |
| Actrt1        | chrX:43682183-43683522 | 0 | 0 |
| Gm595         | chrX:46194642-46230890 | 0 | 0 |
| Arhgap36      | chrX:46823626-46853427 | 0 | 0 |
| Olfr1320      | chrX:47036680-47037640 | 0 | 0 |
| Olfr1321      | chrX:47080149-47081109 | 0 | 0 |
| Igsf1         | chrX:47135713-47150922 | 0 | 0 |
| Olfr1322      | chrX:47238645-47239578 | 0 | 0 |
| Olfr1323      | chrX:47362482-47363412 | 0 | 0 |
| Olfr1324      | chrX:47778672-47779671 | 0 | 0 |
| Usp26         | chrX:49107135-49154410 | 0 | 0 |
| 1700080O16Rik | chrX:49321871-49325949 | 0 | 0 |
| Mir717        | chrX:49775583-49775692 | 0 | 0 |
| A630012P03Rik | chrX:49929019-49972224 | 0 | 0 |
| Mir363        | chrX:50094869-50094944 | 0 | 0 |
| Mir92-2       | chrX:50095014-50095105 | 0 | 0 |
| Mir19b-2      | chrX:50095159-50095243 | 0 | 0 |
| Mir20b        | chrX:50095289-50095369 | 0 | 0 |
| Mir18b        | chrX:50095507-50095590 | 0 | 0 |
| Mir106a       | chrX:50095679-50095744 | 0 | 0 |
| Kis2          | chrX:50095739-50097770 | 0 | 0 |
| Mir450b       | chrX:50401173-50401255 | 0 | 0 |
| Mir450-1      | chrX:50401330-50401421 | 0 | 0 |
| Mir450-2      | chrX:50401475-50401544 | 0 | 0 |
| Mir542        | chrX:50402579-50402664 | 0 | 0 |
| C430049B03Rik | chrX:50406288-50410367 | 0 | 0 |
| Mir351        | chrX:50406431-50406530 | 0 | 0 |
| Mir503        | chrX:50407160-50407231 | 0 | 0 |
| Mir322        | chrX:50407431-50407526 | 0 | 0 |
| Plac1         | chrX:50423178-50467582 | 0 | 0 |
| Fam122c       | chrX:50626609-50654678 | 0 | 0 |
| Etd           | chrX:50788094-50796753 | 0 | 0 |
| 4933416I08Rik | chrX:50989667-50994509 | 0 | 0 |
| 4930502E18Rik | chrX:51028007-51041399 | 0 | 0 |
| 1700013H16Rik | chrX:51046077-51061008 | 0 | 0 |
| Zfp36l3       | chrX:51075862-51079571 | 0 | 0 |
| Xlr           | chrX:51086924-51100873 | 0 | 0 |
| Gm16430       | chrX:51834384-51851190 | 0 | 0 |
| Gm16430       | chrX:51925387-51942193 | 0 | 0 |









|               |                          |   |   |
|---------------|--------------------------|---|---|
| Mir374        | chrX:100768398-100768493 | 0 | 0 |
| Mir374c       | chrX:100768423-100768472 | 0 | 0 |
| Zcchc13       | chrX:100825924-100827003 | 0 | 0 |
| Mir672        | chrX:101311513-101311613 | 0 | 0 |
| 1700121L16Rik | chrX:102012114-102037794 | 0 | 0 |
| Mir384        | chrX:102539620-102539708 | 0 | 0 |
| Cypt2-ps      | chrX:102695110-102695976 | 0 | 0 |
| Tlr13         | chrX:103338613-103355832 | 0 | 0 |
| Fnd3c2        | chrX:103430584-103450711 | 0 | 0 |
| Fndc3c1       | chrX:103615381-103680568 | 0 | 0 |
| Gm5127        | chrX:103778524-103905896 | 0 | 0 |
| Zcchc5        | chrX:104032420-104035982 | 0 | 0 |
| P2ry10        | chrX:104284673-104300309 | 0 | 0 |
| A630033H20Rik | chrX:104344265-104369000 | 0 | 0 |
| Gpr174        | chrX:104451216-104492108 | 0 | 0 |
| Itm2a         | chrX:104592533-104598699 | 0 | 0 |
| 4933401B06Rik | chrX:104737920-104739139 | 0 | 0 |
| Tbx22         | chrX:104863302-104884319 | 0 | 0 |
| Fam46d        | chrX:105011910-105068248 | 0 | 0 |
| Gm732         | chrX:105141073-105143775 | 0 | 0 |
| Gm7134        | chrX:107568091-107570495 | 0 | 0 |
| Pou3f4        | chrX:108009803-108010889 | 0 | 0 |
| Cylc1         | chrX:108305756-108319213 | 0 | 0 |
| Tex16         | chrX:109207128-109240935 | 0 | 0 |
| 4933403O08Rik | chrX:109352657-109357461 | 0 | 0 |
| Sat11         | chrX:109497913-109520388 | 0 | 0 |
| 2010106E10Rik | chrX:109608882-109671952 | 0 | 0 |
| Klh4          | chrX:111588128-111674307 | 0 | 0 |
| Ube2dnl       | chrX:112018620-112019550 | 0 | 0 |
| 4930524E20Rik | chrX:112021190-112022119 | 0 | 0 |
| Cpxcr1        | chrX:113562552-113592392 | 0 | 0 |
| Gm14920       | chrX:114128365-114128713 | 0 | 0 |
| Tgif2lx2      | chrX:115540835-115541867 | 0 | 0 |
| Tgif2lx1      | chrX:115540843-115541865 | 0 | 0 |
| Tgif2lx2      | chrX:115593314-115594346 | 0 | 0 |
| Tgif2lx1      | chrX:115593316-115594338 | 0 | 0 |
| Pabpc5        | chrX:117040804-117043774 | 0 | 0 |
| Pcdh11x       | chrX:117403935-118020059 | 0 | 0 |
| 4932411N23Rik | chrX:123346993-123350397 | 0 | 0 |
| Gm382         | chrX:123574503-123598518 | 0 | 0 |
| 4921511C20Rik | chrX:123928824-123930430 | 0 | 0 |
| 4930558G05Rik | chrX:125586059-125601682 | 0 | 0 |
| Tnmd          | chrX:130385546-130400116 | 0 | 0 |
| Mir3112       | chrX:130609854-130609936 | 0 | 0 |
| Taf7l         | chrX:130994654-131011029 | 0 | 0 |
| B230119M05Rik | chrX:131219100-131221001 | 0 | 0 |
| Nxf2          | chrX:131479069-131499293 | 0 | 0 |
| AV320801      | chrX:131702162-131712171 | 0 | 0 |
| Pramel3       | chrX:131836854-131847175 | 0 | 0 |
| Gm7903        | chrX:131907822-131917932 | 0 | 0 |
| Gm5128        | chrX:131968373-131978536 | 0 | 0 |
| Gm15023       | chrX:132029126-132039133 | 0 | 0 |

|               |                          |   |   |
|---------------|--------------------------|---|---|
| Nxf7          | chrX:132114325-132128394 | 0 | 0 |
| Prame         | chrX:132147540-132162244 | 0 | 0 |
| 1700008I05Rik | chrX:132189236-132228329 | 0 | 0 |
| Tmsb15a       | chrX:132253205-132255212 | 0 | 0 |
| Nxf3          | chrX:132606637-132619794 | 0 | 0 |
| 5730412P04Rik | chrX:132639141-132649959 | 0 | 0 |
| Tceal7        | chrX:132758579-132760639 | 0 | 0 |
| Kir3dl2       | chrX:132982645-133003580 | 0 | 0 |
| Kir3dl1       | chrX:133052537-133068847 | 0 | 0 |
| Rab9b         | chrX:133392689-133403079 | 0 | 0 |
| 1700014N06Rik | chrX:133461863-133462912 | 0 | 0 |
| Esx1          | chrX:133649935-133654865 | 0 | 0 |
| Il1rapl2      | chrX:134106087-135381494 | 0 | 0 |
| Tex13a        | chrX:134742703-134744119 | 0 | 0 |
| Nrk           | chrX:135448968-135543629 | 0 | 0 |
| Serpina7      | chrX:135613788-135619775 | 0 | 0 |
| 4930513O06Rik | chrX:135620781-135627942 | 0 | 0 |
| C330013F16Rik | chrX:135774764-135892277 | 0 | 0 |
| Trap1a        | chrX:135868221-135872704 | 0 | 0 |
| Ripply1       | chrX:136314219-136316892 | 0 | 0 |
| Nup62cl       | chrX:136542211-136597107 | 0 | 0 |
| Mir3475       | chrX:136845486-136845551 | 0 | 0 |
| Frmpr3        | chrX:136916509-136929079 | 0 | 0 |
| Irs4          | chrX:138145540-138159760 | 0 | 0 |
| Gucy2f        | chrX:138513831-138631479 | 0 | 0 |
| Kcne1l        | chrX:138739295-138740741 | 0 | 0 |
| Capn6         | chrX:140236779-140261955 | 0 | 0 |
| Dcx           | chrX:140290384-140367762 | 0 | 0 |
| A730046J19Rik | chrX:140588237-140600817 | 0 | 0 |
| Mir680-2      | chrX:140732332-140732442 | 0 | 0 |
| Zcchc16       | chrX:141123449-141556953 | 0 | 0 |
| Htr2c         | chrX:143397055-143631820 | 0 | 0 |
| Snora35       | chrX:143428932-143429051 | 0 | 0 |
| Mir764        | chrX:143436801-143436909 | 0 | 0 |
| Mir1912       | chrX:143443983-143444070 | 0 | 0 |
| Mir1264       | chrX:143445143-143445229 | 0 | 0 |
| Mir1298       | chrX:143499447-143499545 | 0 | 0 |
| Mir448        | chrX:143592752-143592864 | 0 | 0 |
| Il13ra2       | chrX:143818020-143838375 | 0 | 0 |
| Ott           | chrX:144427535-144467717 | 0 | 0 |
| Gm15093       | chrX:144435111-144467717 | 0 | 0 |
| Gm15107       | chrX:144615266-144659253 | 0 | 0 |
| Ott           | chrX:144615266-144955989 | 0 | 0 |
| Gm15093       | chrX:144756676-144789273 | 0 | 0 |
| Gm15114       | chrX:144923491-144955989 | 0 | 0 |
| Gm15127       | chrX:145098146-145138392 | 0 | 0 |
| Luzp4         | chrX:145317118-145358682 | 0 | 0 |
| Ott           | chrX:145522857-145739546 | 0 | 0 |
| Gm15093       | chrX:145706919-145739546 | 0 | 0 |
| Ott           | chrX:145532494-145572695 | 0 | 0 |
| Gm15093       | chrX:145540098-145572695 | 0 | 0 |
| Ott           | chrX:145882159-145922327 | 0 | 0 |

|               |                          |   |   |
|---------------|--------------------------|---|---|
| Gm15093       | chrX:145889719-145922327 | 0 | 0 |
| Gm10439       | chrX:146029143-146071164 | 0 | 0 |
| Gm15127       | chrX:146219021-146419525 | 0 | 0 |
| Gm15097       | chrX:146219046-146261237 | 0 | 0 |
| Gm15091       | chrX:146376197-146419525 | 0 | 0 |
| Gm15104       | chrX:146747493-146747907 | 0 | 0 |
| Mirlet7f-2    | chrX:148346888-148346971 | 0 | 0 |
| Mir98         | chrX:148347756-148347864 | 0 | 0 |
| Gm7157        | chrX:148997876-148998512 | 0 | 0 |
| Gpr143        | chrX:149216463-149243189 | 0 | 0 |
| Foxr2         | chrX:149553330-149567404 | 0 | 0 |
| Cypt3         | chrX:149993135-149993972 | 0 | 0 |
| Gm15144       | chrX:150436132-150447183 | 0 | 0 |
| Gm10057       | chrX:150436132-150447185 | 0 | 0 |
| 4921511M17Rik | chrX:150457322-150468370 | 0 | 0 |
| Gm10057       | chrX:150457322-150468372 | 0 | 0 |
| Gm15144       | chrX:150478528-150489582 | 0 | 0 |
| Gm10057       | chrX:150478528-150489584 | 0 | 0 |
| Gm15144       | chrX:150544175-150555228 | 0 | 0 |
| Gm16445       | chrX:150587113-150591430 | 0 | 0 |
| 4930524N10Rik | chrX:150773767-150777935 | 0 | 0 |
| 4930542N07Rik | chrX:150916544-150919225 | 0 | 0 |
| Gm5647        | chrX:151009770-151013873 | 0 | 0 |
| Gm16390       | chrX:151321345-151324810 | 0 | 0 |
| Magea6        | chrX:151358554-151360658 | 0 | 0 |
| Magea3        | chrX:151383005-151384112 | 0 | 0 |
| Magea8        | chrX:151420317-151430393 | 0 | 0 |
| Magea2        | chrX:151461743-151467835 | 0 | 0 |
| Magea5        | chrX:151487603-151496096 | 0 | 0 |
| Magea1        | chrX:151523061-151524333 | 0 | 0 |
| 1700042B14Rik | chrX:151559523-151582392 | 0 | 0 |
| Ptchd1        | chrX:152004278-152057870 | 0 | 0 |
| 4930503H13Rik | chrX:152974025-152974660 | 0 | 0 |
| Smpx          | chrX:154136904-154190523 | 0 | 0 |
| Mir3473       | chrX:159312849-159312927 | 0 | 0 |
| Grpr          | chrX:159951835-159987579 | 0 | 0 |
| 1700045I19Rik | chrX:160198071-160199261 | 0 | 0 |
| Tmem27        | chrX:160528118-160556791 | 0 | 0 |
| Asb9          | chrX:160935834-160977684 | 0 | 0 |
| Gira2         | chrX:161566948-161764913 | 0 | 0 |
| Gm1720        | chrX:163099956-163127744 | 0 | 0 |
| Gm8817        | chrX:163501380-163508302 | 0 | 0 |
| Tlr8          | chrX:163680663-163701720 | 0 | 0 |
| Amelx         | chrX:165614045-165625141 | 0 | 0 |
| 4933400A11Rik | chrX:166214309-166217567 | 0 | 0 |
| Zfy1          | chrY:61649-133852        | 0 | 0 |
| Tspy-ps       | chrY:392206-395311       | 0 | 0 |
| Usp9y         | chrY:635403-796225       | 0 | 0 |
| Zfy2          | chrY:1362122-1426357     | 0 | 0 |
| Gm6026        | chrY:1855008-1855344     | 0 | 0 |
| Gm16501       | chrY:1976248-1976584     | 0 | 0 |
| Rbmy1a1       | chrY:2156898-2168120     | 0 | 0 |
